# Supplementary material for: De novo construction of C–O axial chirality via cobalt-catalyzed atroposelective C–H activation/annulation
Source: Royal Society of Chemistry journal article supplement (doi:10.1039/d6sc02299e), 2026-05-06
Supplement: d6sc02299e1.pdf [file d6sc02299e1.pdf]

## Supplementary Information

### De novo construction of C-O axial chirality via cobalt-catalyzed atroposelective C-H activation/annulation

Yanbo Zhang,<sup>a†</sup> Yichao Xie,<sup>a†</sup> Baicheng Guo,<sup>a</sup> Yingchao Dou,<sup>\*a</sup> Dandan Yang,<sup>\*a</sup> and Jun-Long Niu<sup>\*a,b</sup>

<sup>a</sup>College of Chemistry, Pingyuan Laboratory, Zhengzhou University, Zhengzhou 450001. China.

<sup>b</sup>State Key Laboratory of Coking Coal Resources Green Exploitation, Zhengzhou University, Zhengzhou 450001, China.

<sup>†</sup>These authors contributed equally to this work: Yanbo Zhang, Yichao Xie.

<sup>\*</sup>Corresponding authors. Email: yingchaodou@zzu.edu.cn; yangdandan@zzu.edu.cn; niujunlong@zzu.edu.cn

## Table of Contents

|                                                            |      |
|------------------------------------------------------------|------|
| 1. General Information .....                               | S3   |
| 2. Optimization of reaction conditions .....               | S4   |
| 3. General procedure for the synthesis of substrates ..... | S13  |
| 4. General procedure for synthesis of 3 and 5. ....        | S35  |
| 5. Mechanistic studies .....                               | S37  |
| 6. Synthetic applications .....                            | S46  |
| 7. Study on product stabilities.....                       | S61  |
| 8. The non-linear effect studies .....                     | S68  |
| 9. X-ray crystal structure of 3za and 5a.....              | S70  |
| 10. Optical properties. ....                               | S74  |
| 11. Characterization data and HPLC chromatograms .....     | S78  |
| 12. NMR spectra for new compounds .....                    | S159 |
| 13. Supplementary references .....                         | S293 |

## 1. General Information

All materials were commercially obtained and used without further purification.  $^1\text{H}$  NMR,  $^{13}\text{C}$  NMR and  $^{19}\text{F}$  NMR spectra were recorded at 600 MHz and 400 MHz, 151 MHz and 101MHz, 565 MHz and 377 MHz respectively on a Bruker DPX instrument using  $\text{Me}_4\text{Si}$  as an internal standard. Chemical shift multiplicities are reported as follows: (s = singlet, d = doublet, t = triplet, q = quartet, m = multiplet, br = broad, dd = doublet of doublet, dt = doublet of triplet, td = triplet of doublet). Melting points were measured on a WC-1 instrument and uncorrected, and the melting point is determined using compounds that have not been recrystallized. High-resolution mass spectra (HRMS) were recorded on a Quadrupole Time-of-flight Mass Spectrometry (WATERS, G2-XS QTOF, ESI). The conversion of starting materials was monitored by thin layer chromatography (TLC) using silica gel plates (silica gel 60 F254 0.25 mm), and components were visualized by observation under UV light (254 and 365 nm). Column chromatography was performed on silica gel 200-300 mesh. The enantiomeric excess (ee) of the products was determined by high-performance liquid chromatography (HPLC) with a chiral stationary phase in comparison with the authentic racemate sample. Optical Rotations were measured on an Anton Paar MCP 200 polarimeter at 589 nm using a thermostated cell (10 cm). Specific rotations are reported as follows:  $[\alpha]_{\text{D}}^{25}$  = value (c = concentration in g/100 mL, solvent). The absolute configuration of **3za** and **5a** was assigned by the X-ray analysis. Single-crystal X-ray diffraction data were collected on a Rigaku XtaLAB Pro diffractometer with Cu-K $\alpha$  radiation ( $\lambda = 1.54184 \text{ \AA}$ ) for compound **3za** and **5a**. The structure was solved by Direct Method of SHELXS-97 and refined by full-matrix least-squares techniques using the SHELXL-97 program.

## 2. Optimization of reaction conditions

Table S1. Optimization of ligands<sup>a</sup>

$\text{Co(OAc)}_2 \cdot 4\text{H}_2\text{O}$  (10 mol%)  
 $\text{L}$  (20 mol%)  
 $\text{Mn(OAc)}_2 \cdot 4\text{H}_2\text{O}$  (0.5 equiv)  
 2-BuOH, 60 °C, 10 h

---

R = H, **L1**: 91% yield, 75% ee

R = Me, **L2**: 56% yield, 85% ee

R = Ph, **L3**: 17% yield, 95% ee

R = OMe, **L4**: 23% yield, 90% ee

R = Cl, **L5**: 79% yield, 71% ee

R = Br, **L6**: 60% yield, 69% ee

R = OMe, **L7**: 91% yield, 75% ee

**L8**, 46% yield, 96% ee

R<sup>1</sup> = R<sup>2</sup> = <sup>t</sup>Bu, **L9**, trace

R<sup>1</sup> = <sup>t</sup>Bu, R<sup>2</sup> = H, **L10**, trace

R<sup>1</sup> = R<sup>2</sup> = Cl, **L11**, 37% yield, 86% ee

| Entry    | Ligand     | Yield (%) | ee (%)    |
|----------|------------|-----------|-----------|
| 1        | <b>L1</b>  | 91        | 75        |
| 2        | <b>L2</b>  | 56        | 85        |
| 3        | <b>L3</b>  | 17        | 95        |
| 4        | <b>L4</b>  | 23        | 90        |
| 5        | <b>L5</b>  | 79        | 71        |
| 6        | <b>L6</b>  | 60        | 69        |
| 7        | <b>L7</b>  | 91        | 75        |
| <b>8</b> | <b>L8</b>  | <b>46</b> | <b>96</b> |
| 9        | <b>L9</b>  | trace     | --        |
| 10       | <b>L10</b> | trace     | --        |
| 11       | <b>L11</b> | 37        | 86        |

<sup>a</sup>Unless otherwise mentioned, all reactions were carried out using **1a** (0.12 mmol, 54 mg), **2a** (0.1 mmol, 23 mg, 1.0 eq),  $\text{Co(OAc)}_2 \cdot 4\text{H}_2\text{O}$  (0.01 mmol, 2.5 mg, 10 mol%), Ligand (0.02 mmol, 20 mol%),  $\text{Mn(OAc)}_2 \cdot 4\text{H}_2\text{O}$  (0.05 mmol, 13 mg, 0.5 equiv) in 2-BuOH (1 mL) at 60 °C for 10 h, isolated yield. The ee value was determined by HPLC analysis.

**Table S2. Optimization of solvent<sup>a</sup>**

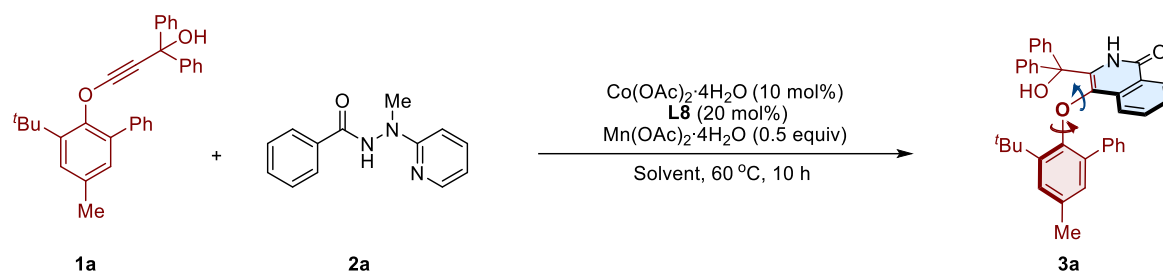

| Entry    | Solvent            | Yield (%) | ee (%)    |
|----------|--------------------|-----------|-----------|
| 1        | DCE                | 3         | 69        |
| 2        | 1,4-Dioxane        | 6         | 57        |
| 3        | THF                | trace     | --        |
| 4        | MeCN               | trace     | --        |
| 5        | MeOH               | 3         | 90        |
| 6        | EtOH               | 21        | 94        |
| 7        | <i>n</i> -PrOH     | 17        | 93        |
| 8        | <i>n</i> -BuOH     | 24        | 89        |
| <b>9</b> | <b>2-BuOH</b>      | <b>46</b> | <b>96</b> |
| 10       | <i>t</i> -BuOH     | 45        | 95        |
| 12       | 2-Methyl-2-Butanol | 33        | 95        |
| 13       | Ethylene glycol    | trace     | --        |

<sup>a</sup>Unless otherwise mentioned, all reactions were carried out using **1a** (0.12 mmol, 54 mg), **2a** (0.1 mmol, 23 mg, 1.0 eq),  $\text{Co}(\text{OAc})_2 \cdot 4\text{H}_2\text{O}$  (0.01 mmol, 2.5 mg, 10 mol%), **L8** (0.02 mmol, 6.6 mg, 20 mol%),  $\text{Mn}(\text{OAc})_2 \cdot 4\text{H}_2\text{O}$  (0.05 mmol, 13 mg, 0.5 equiv) in solvent (1 mL) at 60 °C for 10 h, isolated yield. The ee value was determined by HPLC analysis.

**Table S3. Optimization of Oxidants.<sup>a</sup>**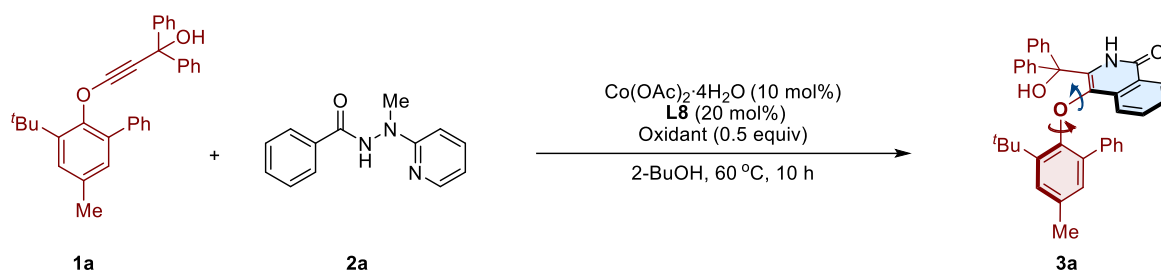

| Entry    | Oxidant                                    | Yield (%) | ee (%)    |
|----------|--------------------------------------------|-----------|-----------|
| 1        | O <sub>2</sub>                             | 19        | 93        |
| 2        | Mn(OAc) <sub>3</sub> ·2H <sub>2</sub> O    | 15        | 95        |
| <b>3</b> | <b>Mn(OAc)<sub>2</sub>·4H<sub>2</sub>O</b> | <b>46</b> | <b>96</b> |
| 4        | Ag <sub>2</sub> CO <sub>3</sub>            | 16        | 91        |
| 5        | AgOAc                                      | 19        | 93        |

<sup>a</sup>Unless otherwise mentioned, all reactions were carried out using **1a** (0.12 mmol, 54 mg), **2a** (0.1 mmol, 23 mg, 1.0 eq),  $\text{Co}(\text{OAc})_2 \cdot 4\text{H}_2\text{O}$  (0.01 mmol, 2.5 mg, 10 mol%), **L8** (0.02 mmol, 6.6 mg, 20 mol%), Oxidant (0.5 equiv) in 2-BuOH (1 mL) at 60 °C for 10 h, isolated yield. The ee value was determined by HPLC analysis.

**Table S4. Optimization of Additives.<sup>a</sup>**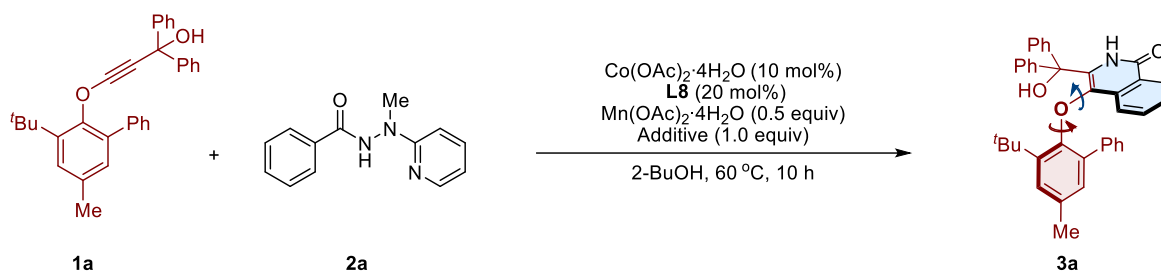

| Entry | Additive                        | Yield (%) | ee (%) |
|-------|---------------------------------|-----------|--------|
| 1     | NaOPiv·H <sub>2</sub> O         | 44        | 95     |
| 2     | 1-AdCOOH                        | 33        | 94     |
| 3     | PivOH                           | 22        | 91     |
| 4     | PhCOOH                          | 21        | 95     |
| 5     | Na <sub>2</sub> CO <sub>3</sub> | 41        | 96     |

<sup>a</sup>Unless otherwise mentioned, all reactions were carried out using **1a** (0.12 mmol, 54 mg), **2a** (0.1 mmol, 23 mg, 1.0 eq),  $\text{Co}(\text{OAc})_2 \cdot 4\text{H}_2\text{O}$  (0.01 mmol, 2.5 mg, 10 mol%), **L8** (0.02 mmol, 6.6 mg, 20 mol%),  $\text{Mn}(\text{OAc})_2 \cdot 4\text{H}_2\text{O}$  (0.05 mmol, 13 mg, 0.5 equiv), Additive (1.0 equiv) in 2-BuOH (1 mL) at 60 °C for 10 h, isolated yield. The ee value was determined by HPLC analysis.

**Table S5. Optimization of amounts of Mn salt <sup>a</sup>**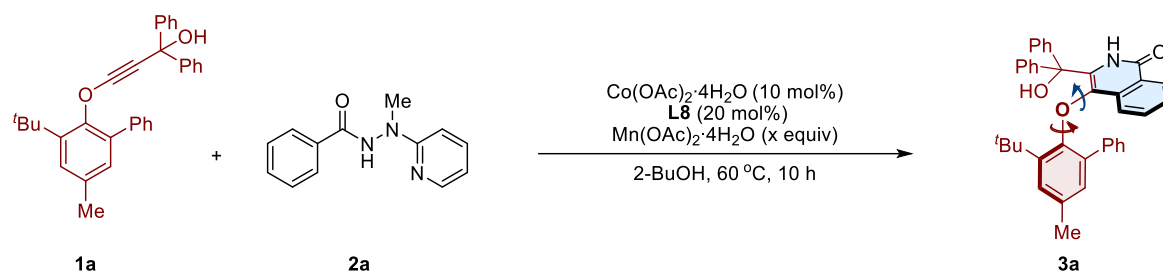

| Entry    | Mn Salt (x equiv) | Yield (%) | ee (%)    |
|----------|-------------------|-----------|-----------|
| 1        | 0.1               | 11        | 96        |
| 2        | 0.3               | 39        | 96        |
| <b>3</b> | <b>0.5</b>        | <b>46</b> | <b>96</b> |
| 4        | 0.6               | 45        | 96        |
| 5        | 0.7               | 43        | 96        |

<sup>a</sup>Unless otherwise mentioned, all reactions were carried out using **1a** (0.12 mmol, 54 mg), **2a** (0.1 mmol, 23 mg, 1.0 eq),  $\text{Co}(\text{OAc})_2 \cdot 4\text{H}_2\text{O}$  (0.01 mmol, 2.5 mg, 10 mol%), **L8** (0.02 mmol, 6.6 mg, 20 mol%),  $\text{Mn}(\text{OAc})_2 \cdot 4\text{H}_2\text{O}$  (x equiv) in 2-BuOH (1 mL) at 60 °C for 10 h, isolated yield. The ee value was determined by HPLC analysis.

**Table S6. Optimization of Co Salt. <sup>a</sup>**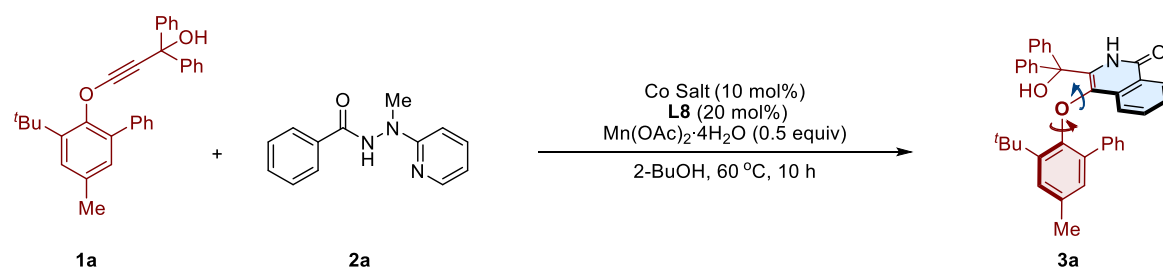

| Entry    | Co salt                                                               | Yield (%) | ee (%)    |
|----------|-----------------------------------------------------------------------|-----------|-----------|
| <b>1</b> | <b><math>\text{Co}(\text{OAc})_2 \cdot 4\text{H}_2\text{O}</math></b> | <b>46</b> | <b>96</b> |
| 2        | $\text{Co}(\text{OAc})_2$                                             | 40        | 95        |
| 3        | $\text{Co}(\text{acac})_2$                                            | trace     | --        |
| 4        | $\text{Co}(\text{ClO}_4)_2 \cdot 6\text{H}_2\text{O}$                 | 3         | 93        |
| 5        | $\text{CoF}_3$                                                        | N.R.      | --        |
| 6        | $\text{CoBr}_2$                                                       | 18        | 95        |
| 7        | $\text{Co}(\text{SO}_4)_2 \cdot 7\text{H}_2\text{O}$                  | trace     | --        |

<sup>a</sup>Unless otherwise mentioned, all reactions were carried out using **1a** (0.12 mmol, 54 mg), **2a** (0.1 mmol, 23 mg, 1.0 eq), Co Salt (0.01 mmol, 10 mol%), **L8** (0.02 mmol, 6.6 mg, 20 mol%),  $\text{Mn}(\text{OAc})_2 \cdot 4\text{H}_2\text{O}$  (0.05 mmol, 13 mg, 0.5 equiv) in 2-BuOH (1 mL) at 60 °C for 10 h, isolated yield. The ee value was determined by HPLC analysis.

**Table S7. Optimization of amounts of cobalt salt and ligand<sup>a</sup>**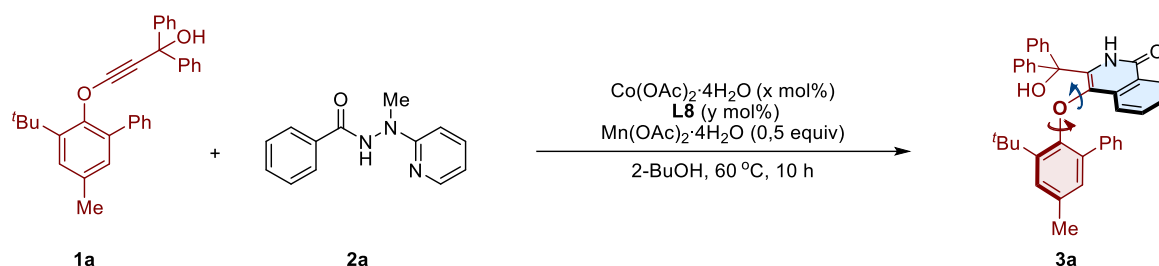

| Entry | X (%) | Y (%) | Yield (%) | ee (%) |
|-------|-------|-------|-----------|--------|
| 1     | 10    | 10    | 46        | 96     |
| 2     | 20    | 20    | 43        | 96     |

<sup>a</sup>Unless otherwise mentioned, all reactions were carried out using **1a** (0.12 mmol, 54 mg), **2a** (0.1 mmol, 23 mg, 1.0 eq),  $\text{Co(OAc)}_2 \cdot 4\text{H}_2\text{O}$  (x mol%), **L8** (y mol%),  $\text{Mn(OAc)}_2 \cdot 4\text{H}_2\text{O}$  (0.05 mmol, 13 mg, 0.5 equiv) in 2-BuOH (1 mL) at 60 °C for 10 h, isolated yield. The ee value was determined by HPLC analysis.

**Table S8. Optimization of Temperature.<sup>a</sup>**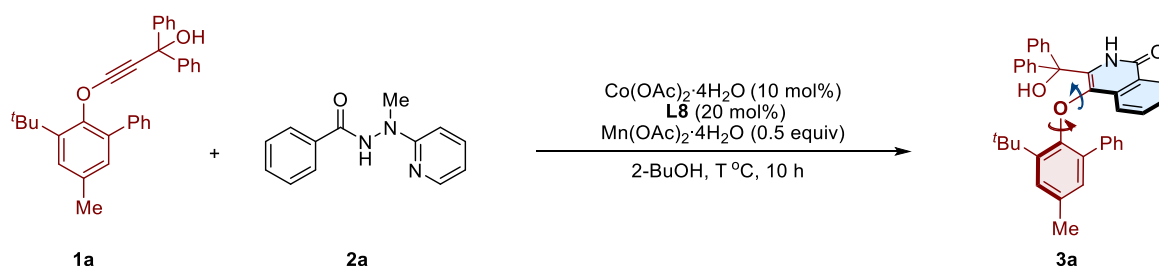

| Entry | T (°C) | Yield (%) | ee (%) |
|-------|--------|-----------|--------|
| 1     | 60     | 45        | 96     |
| 2     | 80     | 46        | 94     |
| 3     | 100    | 43        | 92     |

<sup>a</sup>Unless otherwise mentioned, all reactions were carried out using **1a** (0.12 mmol, 54 mg), **2a** (0.1 mmol, 23 mg, 1.0 eq),  $\text{Co(OAc)}_2 \cdot 4\text{H}_2\text{O}$  (0.01 mmol, 2.5 mg, 10 mol%), **L8** (0.02 mmol, 6.6 mg, 20 mol%),  $\text{Mn(OAc)}_2 \cdot 4\text{H}_2\text{O}$  (0.05 mmol, 13 mg, 0.5 equiv) in 2-BuOH (1 mL) at T °C for 10 h, isolated yield. The ee value was determined by HPLC analysis.

**Table S9. Optimization of time.<sup>a</sup>**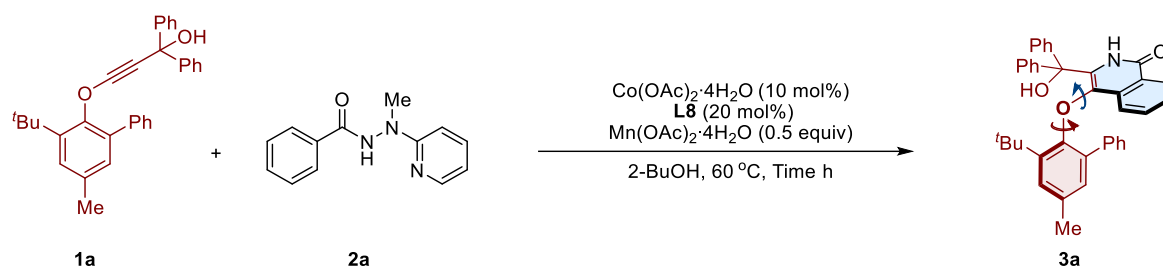

| Entry    | Time (h)  | Yield (%) | ee (%)    |
|----------|-----------|-----------|-----------|
| 1        | 10        | 46        | 96        |
| 2        | 20        | 63        | 96        |
| 3        | 30        | 78        | 96        |
| <b>4</b> | <b>36</b> | <b>89</b> | <b>96</b> |

<sup>a</sup>Unless otherwise mentioned, all reactions were carried out using **1a** (0.12 mmol, 54 mg), **2a** (0.1 mmol, 23 mg, 1.0 eq),  $\text{Co}(\text{OAc})_2 \cdot 4\text{H}_2\text{O}$  (0.01 mmol, 2.5 mg, 10 mol%), **L8** (0.02 mmol, 6.6 mg, 20 mol%),  $\text{Mn}(\text{OAc})_2 \cdot 4\text{H}_2\text{O}$  (0.05 mmol, 13 mg, 0.5 equiv) in 2-BuOH (1 mL) at 60 °C for Time h, isolated yield. The ee value was determined by HPLC analysis.

**Table S10. Optimization of directing group.<sup>a</sup>**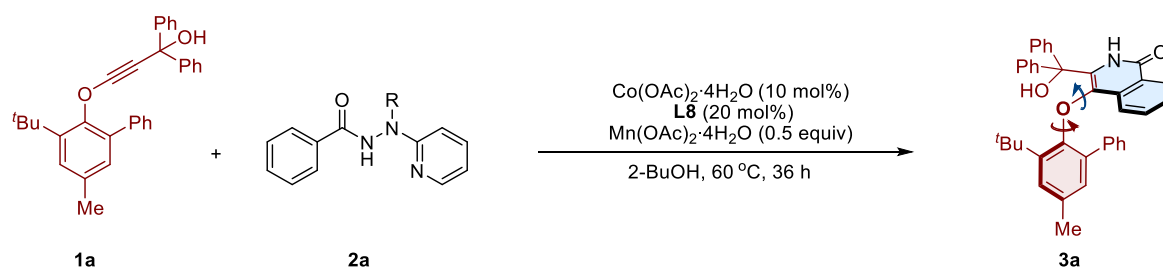

| Entry | R  | Yield (%) | ee (%) |
|-------|----|-----------|--------|
| 1     | Et | 81        | 96     |
| 2     | Pr | 77        | 96     |
| 3     | Bn | 18        | 96     |

<sup>a</sup>Unless otherwise mentioned, all reactions were carried out using **1a** (0.12 mmol, 54 mg), **2a** (0.1 mmol, 23 mg, 1.0 eq),  $\text{Co}(\text{OAc})_2 \cdot 4\text{H}_2\text{O}$  (0.01 mmol, 2.5 mg, 10 mol%), **L8** (0.02 mmol, 6.6 mg, 20 mol%),  $\text{Mn}(\text{OAc})_2 \cdot 4\text{H}_2\text{O}$  (0.05 mmol, 13 mg, 0.5 equiv) in 2-BuOH (1 mL) at 60 °C for 36 h, isolated yield. The ee value was determined by HPLC analysis.

**Table S11. Optimization of ligands<sup>a</sup>**

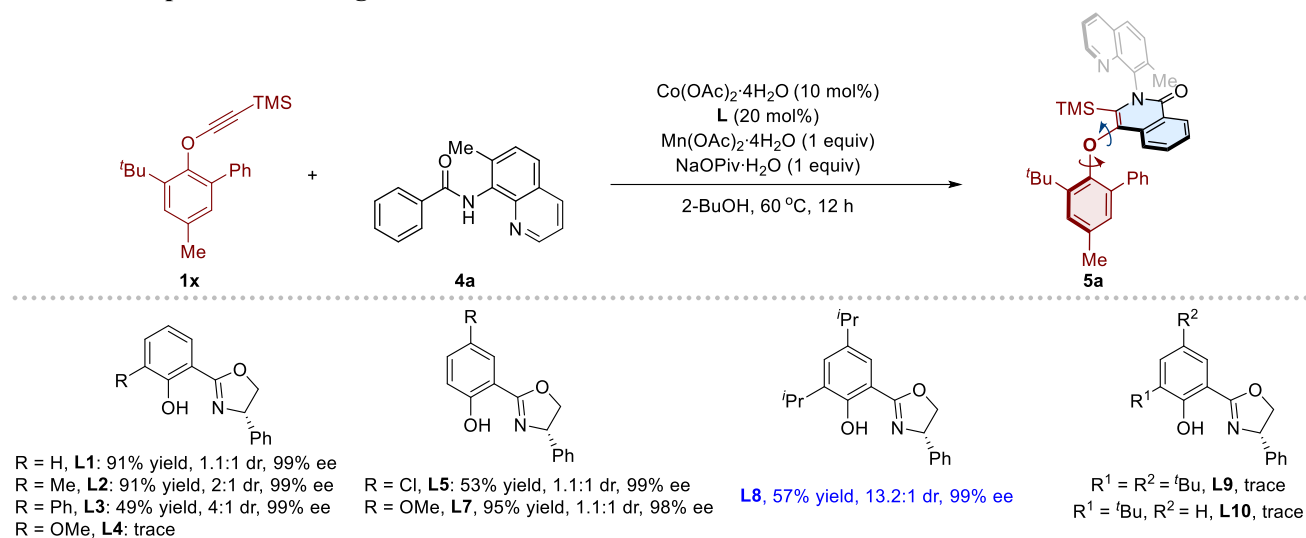

| Entry | Ligand     | Yield (%) | dr     | ee (%) |
|-------|------------|-----------|--------|--------|
| 1     | <b>L1</b>  | 91        | 1.1:1  | 99     |
| 2     | <b>L2</b>  | 91        | 2:1    | 99     |
| 3     | <b>L3</b>  | 49        | 4:1    | 99     |
| 4     | <b>L4</b>  | trace     | --     | --     |
| 5     | <b>L5</b>  | 53        | 1.1:1  | 99     |
| 6     | <b>L7</b>  | 95        | 1.1:1  | 98     |
| 7     | <b>L8</b>  | 57        | 13.2:1 | 99     |
| 8     | <b>L9</b>  | trace     | --     | --     |
| 9     | <b>L10</b> | trace     | --     | --     |

<sup>a</sup>Unless otherwise mentioned, all reactions were carried out using **1x** (0.12 mmol, 39.8 mg, 1.2 equiv), **4a** (0.1 mmol, 26.2 mg),  $\text{Co}(\text{OAc})_2 \cdot 4\text{H}_2\text{O}$  (0.01 mmol, 2.5 mg, 10 mol%), Ligand (0.02 mmol, 20 mol%),  $\text{Mn}(\text{OAc})_2 \cdot 4\text{H}_2\text{O}$  (0.1 mmol, 24.5 mg, 1 equiv),  $\text{NaOPiv} \cdot \text{H}_2\text{O}$  (0.1 mmol, 14.4 mg, 1 equiv) in 2-BuOH (1 mL) at 60 °C under air for 12 h, isolated yield. ee and dr values were determined by HPLC analysis.

**Table S12. Optimization of temperature.<sup>a</sup>**

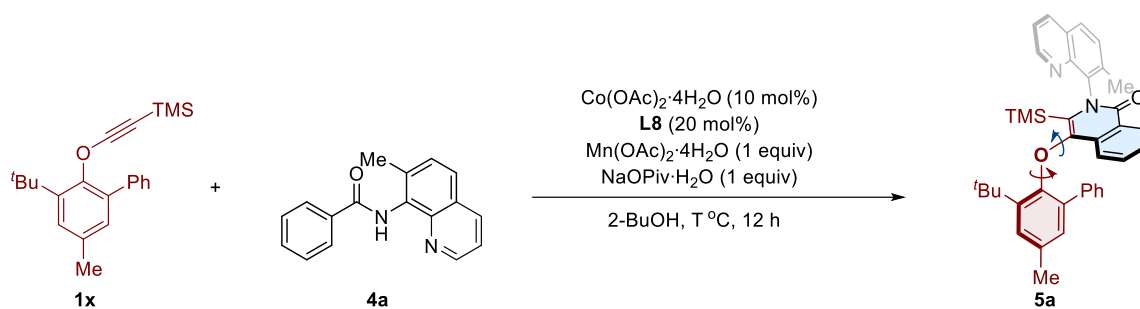

| Entry    | T (°C)    | Yield (%) | dr            | ee (%)     |
|----------|-----------|-----------|---------------|------------|
| 1        | 25        | trace     | --            | --         |
| 2        | 30        | 17        | 17.3:1        | 99%        |
| <b>3</b> | <b>40</b> | <b>26</b> | <b>17.3:1</b> | <b>99%</b> |
| 4        | 50        | 36        | 15.5          | 99%        |
| 5        | 60        | 57        | 13.2:1        | 99%        |
| 6        | 70        | 64        | 13:1          | 98%        |
| 7        | 100       | 35        | 10:1          | 91%        |

<sup>a</sup>Unless otherwise mentioned, all reactions were carried out using **1x** (0.12 mmol, 39.8 mg, 1.2 equiv), **4a** (0.1 mmol, 26.2 mg),  $\text{Co}(\text{OAc})_2 \cdot 4\text{H}_2\text{O}$  (0.01 mmol, 2.5 mg, 10 mol%), **L8** (0.02 mmol, 6.4 mg, 20 mol%),  $\text{Mn}(\text{OAc})_2 \cdot 4\text{H}_2\text{O}$  (0.1 mmol, 24.5 mg, 1.0 equiv),  $\text{NaOPiv} \cdot \text{H}_2\text{O}$  (0.1 mmol, 14.4 mg, 1 equiv) in 2-BuOH (1 mL) at T °C under air for 12 h, isolated yield. ee and dr values were determined by HPLC analysis.

**Table S13. Optimization of time.<sup>a</sup>**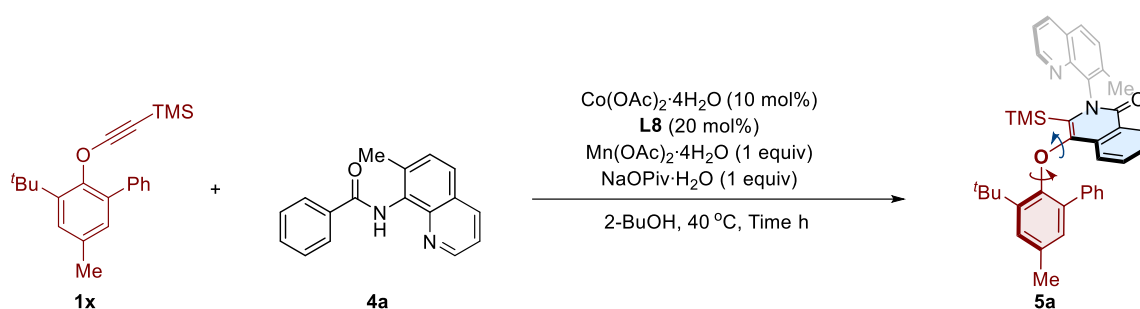

| Entry    | Time (h)  | Yield (%) | dr            | ee (%)    |
|----------|-----------|-----------|---------------|-----------|
| 1        | 12        | 26        | 17.3:1        | 99        |
| 2        | 24        | 36        | 17.3:1        | 99        |
| <b>3</b> | <b>36</b> | <b>48</b> | <b>17.3:1</b> | <b>99</b> |
| 4        | 48        | 50        | 17.3:1        | 99        |

<sup>a</sup>Unless otherwise mentioned, all reactions were carried out using **1x** (0.12 mmol, 39.8 mg, 1.2 equiv), **4a** (0.1 mmol, 26.2 mg),  $\text{Co}(\text{OAc})_2 \cdot 4\text{H}_2\text{O}$  (0.01 mmol, 2.5 mg, 10 mol%), **L8** (0.02 mmol, 6.4 mg, 20 mol%),  $\text{Mn}(\text{OAc})_2 \cdot 4\text{H}_2\text{O}$  (0.1 mmol, 24.5 mg, 1.0 equiv),  $\text{NaOPiv} \cdot \text{H}_2\text{O}$  (0.1 mmol, 14.4 mg, 1 equiv) in 2-BuOH (1 mL) at 40 °C under air for Time h, isolated yield. ee and dr values were determined by HPLC analysis.

**Table S14. Optimization of the amounts of Mn salt.<sup>a</sup>**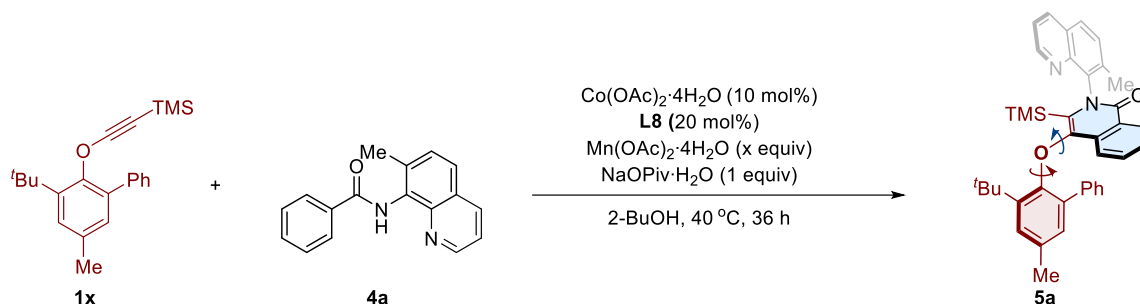

| Entry    | Mn Salt (x equiv) | Yield (%)  | dr          | ee (%)     |
|----------|-------------------|------------|-------------|------------|
| 1        | 0.8               | 72%        | 17.3:1      | 99%        |
| 2        | 0.6               | 76%        | 17.7:1      | 99%        |
| <b>3</b> | <b>0.5</b>        | <b>86%</b> | <b>19:1</b> | <b>99%</b> |
| 4        | 0.3               | 64%        | 16.2:1      | 99%        |

<sup>a</sup>Unless otherwise mentioned, all reactions were carried out using **1x** (0.12 mmol, 39.8 mg, 1.2 equiv), **4a** (0.1 mmol, 26.2 mg),  $\text{Co}(\text{OAc})_2 \cdot 4\text{H}_2\text{O}$  (0.01 mmol, 2.5 mg, 10 mol%), **L8** (0.02 mmol, 6.4 mg, 20 mol%),  $\text{Mn}(\text{OAc})_2 \cdot 4\text{H}_2\text{O}$  (x equiv),  $\text{NaOPiv} \cdot \text{H}_2\text{O}$  (0.1 mmol, 14.4 mg, 1 equiv) in 2-BuOH (1 mL) at 40 °C under air for 36 h, isolated yield. ee and dr values were determined by HPLC analysis.

### 3. General procedure for the synthesis of substrates

#### 3.1 Preparation of benzamide substrates

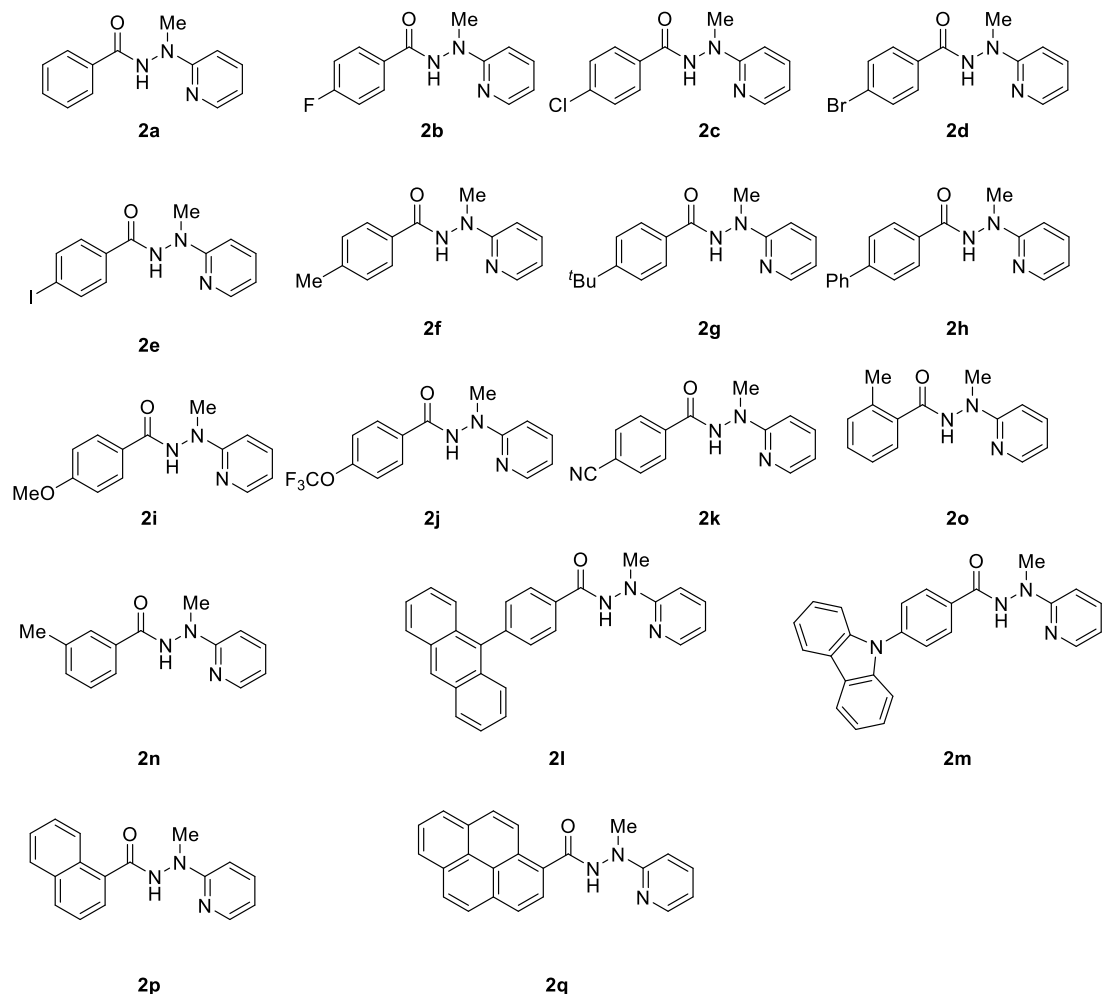

The known substrates **2a-2k**, **2n-2p** were synthesized as reported.<sup>1-2</sup>

According to the references,<sup>1-3</sup> the new compounds **2l**, **2m**, **2q** were synthesized as follows.

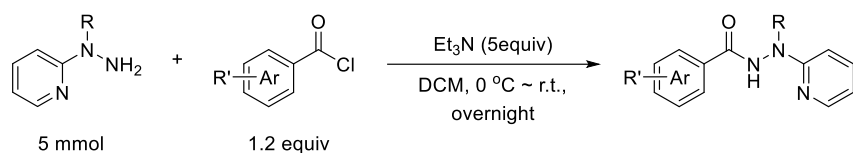

A solution of 2-(1-methylhydrazine)pyridine derivative (5 mmol) and  $\text{Et}_3\text{N}$  (25mmol, 5 equiv) in dichloromethane was added dropwise to acid chloride solution at 0 °C. The resulting mixture was allowed to warm to room temperature and then stirred for 12 h. The mixture was quenched with saturated  $\text{NaHCO}_3$  solution and extracted with DCM for three times. These extracts were combined and dried over  $\text{Na}_2\text{SO}_4$ . The residue was purified by flash column chromatography on silica gel (PE: EA = 2:1 to 1:1) to give the amide.

#### 4-(anthracen-9-yl)-N'-methyl-N'-(pyridin-2-yl)benzohydrazide (2l)

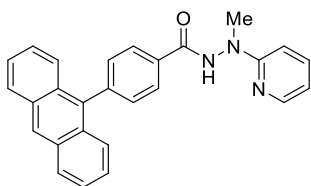

White solid. (1.7 g, 84% yield).

**<sup>1</sup>H NMR** (600 MHz, DMSO-*d*<sub>6</sub>) δ 10.98 (s, 1H), 8.73 (s, 1H), 8.20 (dd, *J* = 16.5, 8.0 Hz, 5H), 7.62 – 7.52 (m, 7H), 7.49 – 7.44 (m, 2H), 6.87 (d, *J* = 8.5 Hz, 1H), 6.75 (dd, *J* = 7.1, 4.9 Hz, 1H), 3.41 (s, 3H).

**<sup>13</sup>C NMR** (151 MHz, DMSO-*d*<sub>6</sub>) δ 165.9, 160.1, 147.8, 142.4, 137.9, 135.8, 132.5, 131.7, 131.4, 129.8, 129.0, 128.3, 127.4, 126.6, 126.2, 125.9, 114.2, 107.3, 38.2.

**HRMS** (ESI): *m/z* [M+H]<sup>+</sup> calcd for [C<sub>27</sub>H<sub>22</sub>N<sub>3</sub>O]<sup>+</sup> required 404.1757, found 404.1765.

#### 4-(9H-carbazol-9-yl)-N'-methyl-N'-(pyridin-2-yl)benzohydrazide (2m)

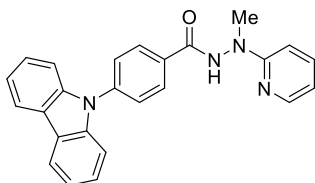

White solid. (1.8 g, 92% yield).

**<sup>1</sup>H NMR** (600 MHz, CDCl<sub>3</sub>) δ 9.11 (s, 1H), 8.22 (d, *J* = 5.0 Hz, 1H), 8.13 (t, *J* = 9.0 Hz, 4H), 7.63 (d, *J* = 8.0 Hz, 2H), 7.53 (t, *J* = 7.9 Hz, 1H), 7.43 – 7.37 (m, 4H), 7.30 (t, *J* = 7.4 Hz, 2H), 6.81 (d, *J* = 8.5 Hz, 1H), 6.74 (t, *J* = 6.1 Hz, 1H), 3.47 (s, 3H).

**<sup>13</sup>C NMR** (151 MHz, CDCl<sub>3</sub>) δ 165.8, 159.2, 147.6, 141.4, 140.3, 137.9, 131.1, 129.1, 126.8, 126.2, 123.8, 120.6, 120.5, 114.9, 109.7, 107.2, 39.1.

**HRMS** (ESI): *m/z* [M+H]<sup>+</sup> calcd for [C<sub>25</sub>H<sub>21</sub>N<sub>4</sub>O]<sup>+</sup> required 393.1710, found 393.1721.

#### N'-methyl-N'-(pyridin-2-yl)pyrene-1-carbohydrazide (2q)

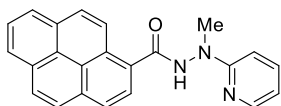

White solid. (1.23 g, 70% yield).

**<sup>1</sup>H NMR** (600 MHz, DMSO-*d*<sub>6</sub>) δ 10.93 (s, 1H), 8.60 (d, *J* = 9.2 Hz, 1H), 8.43 – 8.25 (m, 8H), 8.15 (t, *J* = 7.6 Hz, 1H), 7.74 – 7.60 (m, 1H), 7.03 (d, *J* = 8.5 Hz, 1H), 6.79 (dd, *J* = 7.1, 4.8 Hz, 1H), 3.52 (s, 3H).

**<sup>13</sup>C NMR** (151 MHz, DMSO-*d*<sub>6</sub>) δ 168.6, 160.1, 147.9, 138.1, 132.6, 131.2, 130.7, 129.7, 129.2, 129.1, 128.9, 127.7, 127.2, 126.5, 126.3, 126.0, 124.9, 124.7, 124.4, 124.1, 114.4, 107.3, 38.3.

**HRMS** (ESI): *m/z* [M+H]<sup>+</sup> calcd for [C<sub>23</sub>H<sub>18</sub>N<sub>3</sub>O]<sup>+</sup> required 352.1444, found 352.1452.

### N'-ethyl-N'-(pyridin-2-yl)benzohydrazide (2r)

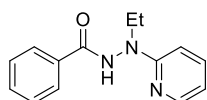

White solid. (1.01 g, 83% yield).

**<sup>1</sup>H NMR** (600 MHz, CDCl<sub>3</sub>) δ 8.40 (s, 1H), 8.19 (d, *J* = 6.0 Hz, 1H), 7.89 (d, *J* = 7.9 Hz, 2H), 7.55 (t, *J* = 7.6 Hz, 1H), 7.47 (dt, *J* = 15.1, 8.1 Hz, 3H), 6.75 (d, *J* = 8.5 Hz, 1H), 6.73 – 6.68 (m, 1H), 3.93 (q, *J* = 7.1 Hz, 2H), 1.25 (t, *J* = 7.1 Hz, 3H).

**<sup>13</sup>C NMR** (151 MHz, CDCl<sub>3</sub>) δ 166.9, 158.8, 147.8, 137.9, 133.0, 132.3, 128.9, 127.4, 114.9, 107.6, 45.1, 12.1.

**HRMS** (ESI): *m/z* [M+H]<sup>+</sup> calcd for [C<sub>14</sub>H<sub>16</sub>N<sub>3</sub>O]<sup>+</sup> required 242.1293, found 242.1295.

### N'-propyl-N'-(pyridin-2-yl)benzohydrazide (2s)

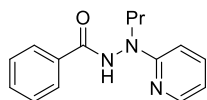

White solid. (1.07 g, 84% yield).

**<sup>1</sup>H NMR** (600 MHz, CDCl<sub>3</sub>) δ 8.64 (s, 1H), 8.17 (d, *J* = 4.9 Hz, 1H), 7.85 (d, *J* = 7.6 Hz, 2H), 7.52 (t, *J* = 7.5 Hz, 1H), 7.43 (dt, *J* = 23.6, 7.4 Hz, 3H), 6.68 (dd, *J* = 17.5, 7.4 Hz, 2H), 3.79 (t, *J* = 7.6 Hz, 2H), 1.67 (q, *J* = 7.5 Hz, 2H), 0.93 (t, *J* = 7.4 Hz, 3H).

**<sup>13</sup>C NMR** (151 MHz, CDCl<sub>3</sub>) δ 166.7, 158.9, 147.7, 137.6, 132.8, 132.1, 128.7, 127.3, 114.5, 107.1, 51.9, 20.4, 11.4.

**HRMS** (ESI): *m/z* [M+H]<sup>+</sup> calcd for [C<sub>15</sub>H<sub>18</sub>N<sub>3</sub>O]<sup>+</sup> required 256.1444, found 256.1468.

### N'-benzyl-N'-(pyridin-2-yl)benzohydrazide (2t)

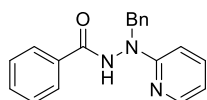

White solid. (1.23 g, 81% yield).

**<sup>1</sup>H NMR** (400 MHz, CDCl<sub>3</sub>) δ 8.23 (d, *J* = 5.0 Hz, 1H), 8.04 (d, *J* = 32.8 Hz, 1H), 7.68 (d, *J* = 8.3 Hz, 2H), 7.56 – 7.46 (m, 2H), 7.36 (ddd, *J* = 34.1, 14.0, 6.3 Hz, 6H), 6.83 – 6.70 (m, 2H), 5.16 (d, *J* = 3.1 Hz, 2H).

**<sup>13</sup>C NMR (151 MHz, CDCl<sub>3</sub>)** δ 66.8, 159.1, 147.9, 138.0, 137.5, 132.8, 132.3, 128.9, 128.8, 127.7, 127.3, 115.1, 107.2, 53.0

**HRMS** (ESI): *m/z* [M+H]<sup>+</sup> calcd for [C<sub>19</sub>H<sub>18</sub>N<sub>3</sub>O]<sup>+</sup> required 304.1450, found 304.1455.

### 3.2 The procedure for the synthesis of **1**

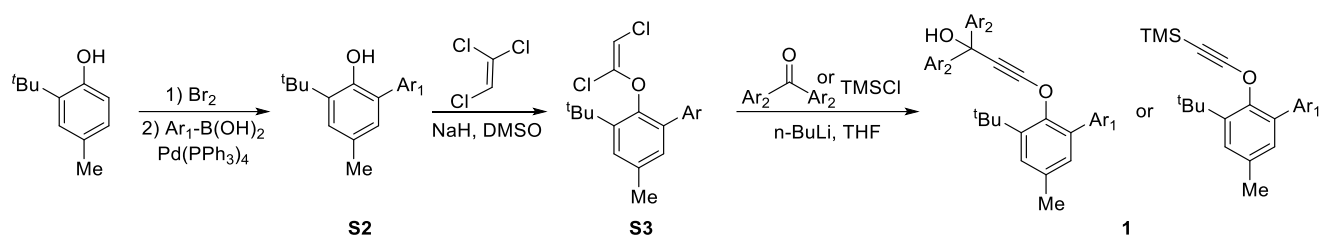

**1** were synthesized according to literature procedures.<sup>3-6</sup>

To a solution of 2-tert-butyl-4-methylphenol (5.0 g, 10 mmol) in  $\text{CH}_2\text{Cl}_2$  (25 mL) was added  $\text{Br}_2$  (10 mmol, 1 equiv.) in one portion at  $0^\circ\text{C}$ . After stirring for 2 h at room temperature, the reaction was quenched with aqueous  $\text{NaHCO}_3$ . The organic layer was washed with brine and dried over  $\text{MgSO}_4$ . After filtration, the filtrate was concentrated in vacuo and the residue was purified by column chromatography on silica gel to provide **S1** as a colorless oil.

To a flask containing  $\text{Pd}(\text{PPh}_3)_4$  (0.48 mmol, 5 mol%),  $\text{Ar-B(OH)}_2$  (1.2 equiv.),  $\text{Na}_2\text{CO}_3$  (19 mmol, 2 equiv.) and **S1** (9.5 mmol) were added  $\text{THF}$  (28 mL) and  $\text{H}_2\text{O}$  (8 mL). After stirring for 12 h at  $90^\circ\text{C}$ , the reaction mixture was cooled to room temperature and  $\text{EtOAc}$  (5 mL) was added to the reaction mixture. The mixture was extracted with  $\text{EtOAc}$ , and the organic layer was washed with brine and dried over  $\text{MgSO}_4$ . After filtration, the filtrate was concentrated in vacuo and the residue was purified by column chromatography on silica gel to provide **S2** as a colorless oil.

To a solution of **S2** (6.2 mmol, 1.0 equiv) in  $\text{DMSO}$  (20 mL) was added  $\text{NaOH}$  (6.2 mmol, 1.0 equiv). The mixture was stirred at room temperature for 2 h. Afterwards 1,1,2-trichloroethylene was slowly added and the reaction mixture was stirred overnight. After the completion of the reaction (monitored by TLC), the reaction mixture was quenched with water (50 mL) and the layers were separated. The aqueous layer was extracted with  $\text{DCM}$  (30 mL x 3). The combined organic layers were washed with brine, dried over  $\text{Na}_2\text{SO}_4$ , filtered, and evaporated. The residue was purified by column chromatography on silica gel, eluting with petroleum ether to give **S3** as a white solid.

To a solution of **S3** (5.7 mmol, 1.0 equiv) in  $\text{THF}$  (20 mL) was added dropwise  $n\text{-BuLi}$  (2.5 M solution in hexane, 12.5 mmol, 2.2 equiv) at  $-78^\circ\text{C}$ . The solution was then stirred at room temperature for 2 h. After cooling to  $-78^\circ\text{C}$  again, the  $\text{TMSCl}$  or Aryl ketone (1.1 equiv) is added dropwise and the mixture is stirred for 16 h at room temperature. After completion of the reaction (monitored by TLC), the reaction was quenched with water and the reaction mixture was extracted with  $\text{EtOAc}$ . The organic layers were washed with water and brine, dried over  $\text{Na}_2\text{SO}_4$ , filtered, and evaporated. The solvent was removed under vacuum and the residue was purified by flash chromatography on silica gel (PE: EA = 30:1) to afford compound **1**.

### 3-((3-(tert-butyl)-5-methyl-[1,1'-biphenyl]-2-yl)oxy)-1,1-diphenylprop-2-yn-1-ol (1a)

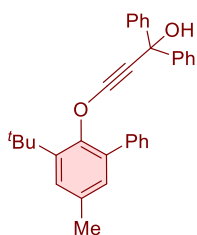

Yellow oil. (2.90 g, 67% yield).

**<sup>1</sup>H NMR** (600 MHz, CDCl<sub>3</sub>) δ 7.50 (d, *J* = 7.5 Hz, 2H), 7.42 – 7.39 (m, 2H), 7.36 (t, *J* = 7.2 Hz, 1H), 7.25 – 7.21 (m, 4H), 7.17 (t, *J* = 7.4 Hz, 4H), 7.14 (d, *J* = 5.0 Hz, 3H), 7.03 (s, 1H), 2.35 (s, 3H), 1.93 (s, 1H), 1.47 (s, 9H).

**<sup>13</sup>C NMR** (151 MHz, CDCl<sub>3</sub>) δ 151.1, 147.4, 145.9, 141.1, 137.8, 135.6, 134.3, 130.6, 129.7, 128.6, 128.3, 128.0, 127.6, 127.5, 127.2, 126.9, 126.2, 126.0, 94.2, 74.1, 44.0, 35.3, 30.8, 21.3.

**HRMS** (ESI): *m/z* [M+H]<sup>+</sup> calcd for [C<sub>32</sub>H<sub>31</sub>O<sub>2</sub>]<sup>+</sup> required 447.2324, found 447.2348.

### 3-((3-(tert-butyl)-4'-fluoro-5-methyl-[1,1'-biphenyl]-2-yl)oxy)-1,1-diphenylprop-2-yn-1-ol (1b)

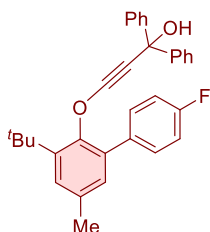

Yellow oil. (2.45 g, 53% yield).

**<sup>1</sup>H NMR** (600 MHz, CDCl<sub>3</sub>) δ 7.50 – 7.42 (m, 2H), 7.22 (d, *J* = 6.6 Hz, 4H), 7.17 (dt, *J* = 21.9, 7.3 Hz, 7H), 7.06 (t, *J* = 8.6 Hz, 2H), 6.99 (s, 1H), 2.35 (s, 3H), 2.12 (s, 1H), 1.46 (d, *J* = 1.8 Hz, 9H).

**<sup>13</sup>C NMR** (151 MHz, CDCl<sub>3</sub>) δ 163.4 (d, <sup>1</sup>*J*<sub>C-F</sub> = 247.2 Hz), 151.0, 145.8, 141.3, 135.7, 133.6 (d, <sup>4</sup>*J*<sub>C-F</sub> = 3.3 Hz), 133.5, 131.3 (d, <sup>3</sup>*J*<sub>C-F</sub> = 8.1 Hz), 130.5, 127.99, 127.6, 127.3, 126.0, 115.6 (d, <sup>2</sup>*J*<sub>C-F</sub> = 21.2 Hz), 94.1, 74.2, 43.8, 35.3, 30.8, 21.3.

**<sup>19</sup>F NMR** (565 MHz, CDCl<sub>3</sub>) δ -114.27.

**HRMS** (ESI): *m/z* [M+Na]<sup>+</sup> calcd for [C<sub>32</sub>H<sub>29</sub>FNao<sub>2</sub>]<sup>+</sup> required 487.2049, found 487.2056

### 3-((3-(tert-butyl)-4'-chloro-5-methyl-[1,1'-biphenyl]-2-yl)oxy)-1,1-diphenylprop-2-yn-1-ol (1c)

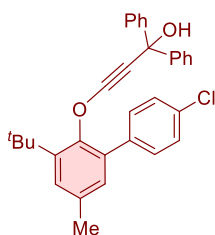

Yellow oil. (2.41 g, 51% yield).

**<sup>1</sup>H NMR** (600 MHz, CDCl<sub>3</sub>) δ 7.42 (d, *J* = 8.3 Hz, 2H), 7.35 (d, *J* = 8.4 Hz, 2H), 7.24 – 7.18 (m, 8H), 7.18 – 7.13 (m, 3H), 6.99 (s, 1H), 2.35 (s, 3H), 2.15 (s, 1H), 1.46 (s, 9H).

**<sup>13</sup>C NMR** (151 MHz, CDCl<sub>3</sub>) δ 151.0, 145.7, 141.4, 136.1, 135.8, 133.8, 133.3, 130.9, 130.4, 128.8, 128.0, 127.9, 127.3, 126.0, 94.1, 74.2, 43.9, 35.3, 30.8, 21.3.

**HRMS** (ESI): *m/z* [M+H]<sup>+</sup> calcd for [C<sub>32</sub>H<sub>30</sub>ClO<sub>2</sub>]<sup>+</sup> required 481.1934, found 481.1945.

### 3-((3-(tert-butyl)-4',5-dimethyl-[1,1'-biphenyl]-2-yl)oxy)-1,1-diphenylprop-2-yn-1-ol (1d)

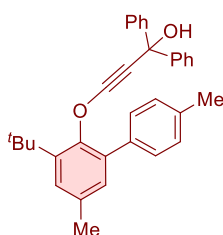

Yellow oil. (1.97 g, 43% yield).

**<sup>1</sup>H NMR** (600 MHz, CDCl<sub>3</sub>) δ 7.39 (d, *J* = 7.8 Hz, 2H), 7.24 (d, *J* = 8.1 Hz, 4H), 7.21 (d, *J* = 7.4 Hz, 2H), 7.17 (d, *J* = 7.7 Hz, 4H), 7.16 – 7.10 (m, 3H), 7.02 (s, 1H), 2.38 (s, 3H), 2.34 (s, 3H), 1.98 (s, 1H), 1.46 (s, 9H).

**<sup>13</sup>C NMR** (151 MHz, CDCl<sub>3</sub>) δ 151.1, 145.9, 141.0, 137.5, 135.5, 134.9, 134.3, 130.5, 129.6, 129.2, 128.3, 127.9, 127.2, 127.1, 126.2, 126.1, 94.2, 74.1, 44.0, 35.3, 30.8, 21.4, 21.3.

**HRMS** (ESI): *m/z* [M+K]<sup>+</sup> calcd for [C<sub>33</sub>H<sub>32</sub>KO<sub>2</sub>]<sup>+</sup> required 499.2039, found 499.1947.

### 3-((3,4'-di-tert-butyl-5-methyl-[1,1'-biphenyl]-2-yl)oxy)-1,1-diphenylprop-2-yn-1-ol (1e)

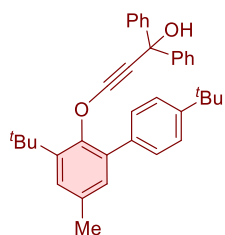

Yellow oil. (1.86 g, 37% yield).

**<sup>1</sup>H NMR** (600 MHz, CDCl<sub>3</sub>) δ 7.44 (s, 4H), 7.25 (d, *J* = 8.5 Hz, 4H), 7.17 (t, *J* = 7.4 Hz, 4H), 7.13 (d, *J* = 9.5 Hz, 3H), 7.03 (s, 1H), 2.33 (s, 3H), 1.83 (s, 1H), 1.46 (s, 9H), 1.31 (s, 9H).

**<sup>13</sup>C NMR** (151 MHz, CDCl<sub>3</sub>) δ 151.2, 150.8, 145.9, 140.9, 135.4, 134.8, 134.1, 130.6, 129.4, 127.9, 127.2, 127.1, 126.0, 125.4, 94.2, 74.0, 44.3, 35.3, 34.7, 31.5, 30.8, 21.3.

**HRMS** (ESI): *m/z* [M+H]<sup>+</sup> calcd for [C<sub>36</sub>H<sub>39</sub>O<sub>2</sub>]<sup>+</sup> required 503.2950, found 503.2960.

### 3-((3-(tert-butyl)-5-methyl-[1,1':4',1''-terphenyl]-2-yl)oxy)-1,1-diphenylprop-2-yn-1-ol (1f)

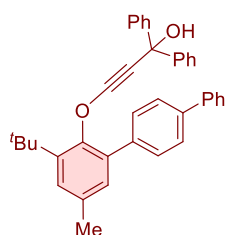

Yellow oil. (2.24 g, 43% yield).

**<sup>1</sup>H NMR** (600 MHz, CDCl<sub>3</sub>) δ 7.62 (d, *J* = 7.9 Hz, 2H), 7.58 (d, *J* = 7.4 Hz, 4H), 7.43 (t, *J* = 7.6 Hz, 2H), 7.34 (t, *J* = 7.4 Hz, 1H), 7.22 (d, *J* = 7.3 Hz, 4H), 7.15 (s, 1H), 7.10 (q, *J* = 8.2 Hz, 7H), 2.36 (s, 3H), 2.01 (s, 1H), 1.48 (s, 9H).

**<sup>13</sup>C NMR** (151 MHz, CDCl<sub>3</sub>) δ 151.2, 145.8, 141.1, 140.7, 140.6, 136.7, 135.6, 133.9, 130.5, 130.1, 128.9, 127.9, 127.6, 127.5, 127.3, 127.2, 127.1, 126.0, 94.2, 74.1, 44.2, 35.3, 30.8, 21.3.

**HRMS** (ESI): *m/z* [M+Na]<sup>+</sup> calcd for [C<sub>38</sub>H<sub>34</sub>NaO<sub>2</sub>]<sup>+</sup> required 545.2457, found 545.2466.

**3-((3-(tert-butyl)-5-methyl-4'-(trifluoromethyl)-[1,1'-biphenyl]-2-yl)oxy)-1,1-diphenylprop-2-yn-1-ol (1g)**

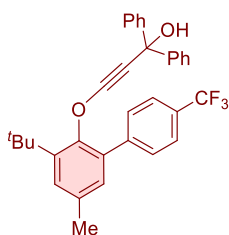

Yellow oil. (1.95 g, 38% yield).

**<sup>1</sup>H NMR** (600 MHz, CDCl<sub>3</sub>) δ 7.61 (d, *J* = 8.3 Hz, 2H), 7.57 (d, *J* = 8.3 Hz, 2H), 7.21 – 7.13 (m, 11H), 7.00 (s, 1H), 2.36 (s, 3H), 2.05 (s, 1H), 1.48 (s, 9H).

**<sup>13</sup>C NMR** (151 MHz, CDCl<sub>3</sub>) δ 151.1, 145.6, 141.5, 141.3, 136.0, 133.2, 130.4, 129.9, 128.4, 128.0, 127.4, 125.9, 125.4, 125.3 (q, <sup>1</sup>*J*<sub>C-F</sub> = 272.0 Hz), 123.5, 94.0, 74.1, 44.0, 35.4, 30.8, 21.2.

**<sup>19</sup>F NMR** (565 MHz, CDCl<sub>3</sub>) δ -62.31.

**HRMS** (ESI): *m/z* [M+Na]<sup>+</sup> calcd for [C<sub>33</sub>H<sub>29</sub>F<sub>3</sub>NaO<sub>2</sub>]<sup>+</sup> required 537.2017, found 537.2007.

**3-((3-(tert-butyl)-3',5-dimethyl-[1,1'-biphenyl]-2-yl)oxy)-1,1-diphenylprop-2-yn-1-ol (1h)**

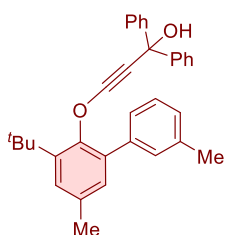

Yellow oil. (2.53 g, 55% yield).

**<sup>1</sup>H NMR** (600 MHz, CDCl<sub>3</sub>) δ 7.30 (d, *J* = 4.3 Hz, 3H), 7.24 (d, *J* = 8.3 Hz, 4H), 7.21 – 7.15 (m, 5H), 7.14 (d, *J* = 7.1 Hz, 3H), 7.02 (s, 1H), 2.34 (s, 3H), 2.31 (s, 3H), 1.94 (s, 1H), 1.46 (s, 9H).

**<sup>13</sup>C NMR** (151 MHz, CDCl<sub>3</sub>) δ 151.1, 145.9, 141.0, 138.3, 137.8, 135.4, 134.4, 130.6, 130.4, 128.5, 128.3, 127.9, 127.4, 127.2, 126.8, 126.0, 94.2, 74.1, 44.1, 35.3, 30.8, 21.5, 21.3.

**HRMS** (ESI): *m/z* [M+H]<sup>+</sup> calcd for [C<sub>33</sub>H<sub>33</sub>O<sub>2</sub>]<sup>+</sup> required 461.2481, found 461.2474.

### 3-((3-(tert-butyl)-5-methyl-[1,1'-biphenyl]-2-yl)oxy)-1,1-bis(4-fluorophenyl)prop-2-yn-1-ol (1i)

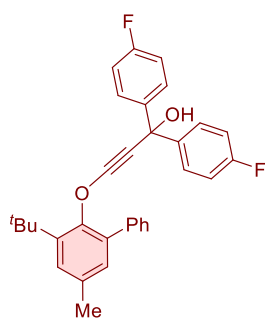

Yellow oil. (2.41 g, 50% yield).

**<sup>1</sup>H NMR** (600 MHz, CDCl<sub>3</sub>) δ 7.50 (d, *J* = 7.4 Hz, 2H), 7.41 (t, *J* = 7.3 Hz, 2H), 7.37 (d, *J* = 7.1 Hz, 1H), 7.15 (t, *J* = 7.1 Hz, 5H), 7.04 (s, 1H), 6.85 (t, *J* = 8.5 Hz, 4H), 2.35 (s, 3H), 1.97 (s, 1H), 1.46 (s, 9H).

**<sup>13</sup>C NMR** (151 MHz, CDCl<sub>3</sub>) δ 162.9 (d, <sup>1</sup>*J*<sub>C-F</sub> = 246.0 Hz), 151.0, 141.6 (d, <sup>4</sup>*J*<sub>C-F</sub> = 3.2 Hz), 141.1, 137.8, 135.8, 134.2, 130.7, 129.7, 128.6, 127.8, 127.7, 127.5 (d, <sup>3</sup>*J*<sub>C-F</sub> = 8.3 Hz), 114.8 (d, <sup>2</sup>*J*<sub>C-F</sub> = 21.5 Hz), 94.5, 73.2, 43.6, 35.3, 30.8, 21.3.

**<sup>19</sup>F NMR** (565 MHz, CDCl<sub>3</sub>) δ -115.66.

**HRMS** (ESI): *m/z* [M+K]<sup>+</sup> calcd for [C<sub>32</sub>H<sub>28</sub>F<sub>2</sub>KO<sub>2</sub>]<sup>+</sup> required 521.1694, found 521.1654.

### 3-((3-(tert-butyl)-5-methyl-[1,1'-biphenyl]-2-yl)oxy)-1,1-bis(4-chlorophenyl)prop-2-yn-1-ol (1j)

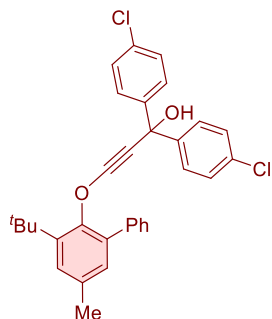

Yellow oil. (3.13 g, 61% yield).

**<sup>1</sup>H NMR** (600 MHz, CDCl<sub>3</sub>) δ 7.52 (d, *J* = 8.3 Hz, 2H), 7.44 (t, *J* = 7.4 Hz, 2H), 7.39 (t, *J* = 7.2 Hz, 1H), 7.17 (d, *J* = 8.6 Hz, 5H), 7.13 (d, *J* = 8.7 Hz, 4H), 7.07 (s, 1H), 2.38 (s, 3H), 1.99 (s, 1H), 1.48 (s, 9H).

**<sup>13</sup>C NMR** (151 MHz, CDCl<sub>3</sub>) δ 150.9, 144.1, 141.1, 137.8, 135.8, 134.1, 133.3, 130.7, 129.7, 128.6, 128.2, 127.7, 127.6, 127.4, 94.6, 73.2, 43.2, 35.3, 30.8, 21.3.

**HRMS** (ESI): *m/z* [M+H]<sup>+</sup> calcd for [C<sub>32</sub>H<sub>29</sub>Cl<sub>2</sub>O<sub>2</sub>]<sup>+</sup> required 515.1545, found 515.1536.

**1,1-bis(4-bromophenyl)-3-((3-(tert-butyl)-5-methyl-[1,1'-biphenyl]-2-yl)oxy)prop-2-yn-1-ol (1k)**

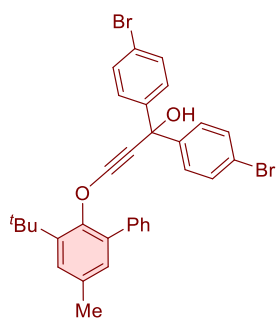

Yellow oil. (3.68 g, 61% yield).

**<sup>1</sup>H NMR** (600 MHz, CDCl<sub>3</sub>) δ 7.51 (d, *J* = 7.9 Hz, 2H), 7.43 (t, *J* = 7.5 Hz, 2H), 7.39 (t, *J* = 7.1 Hz, 1H), 7.31 (d, *J* = 8.0 Hz, 4H), 7.17 (s, 1H), 7.06 (d, *J* = 7.8 Hz, 5H), 2.38 (s, 3H), 1.97 (s, 1H), 1.47 (s, 9H).

**<sup>13</sup>C NMR** (151 MHz, CDCl<sub>3</sub>) δ 150.9, 144.5, 141.0, 137.7, 135.9, 134.1, 131.2, 130.7, 129.7, 128.6, 127.8, 127.7, 127.6, 121.5, 94.6, 73.3, 43.1, 35.3, 30.8, 21.3.

**HRMS** (ESI): *m/z* [M+K]<sup>+</sup> calcd for [C<sub>32</sub>H<sub>28</sub>Br<sub>2</sub>KO<sub>2</sub>]<sup>+</sup> required 641.0093, found 641.0100.

**3-((3-(tert-butyl)-5-methyl-[1,1'-biphenyl]-2-yl)oxy)-1,1-di-p-tolylprop-2-yn-1-ol (1l)**

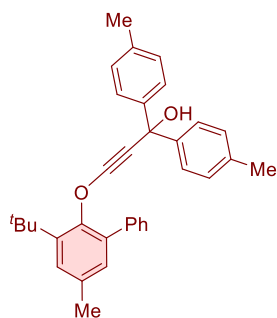

Yellow oil. (3.08 g, 65% yield).

**<sup>1</sup>H NMR** (600 MHz, CDCl<sub>3</sub>) δ 7.54 (d, *J* = 7.8 Hz, 2H), 7.44 (t, *J* = 7.5 Hz, 2H), 7.40 (t, *J* = 7.3 Hz, 1H), 7.16 (s, 1H), 7.13 (d, *J* = 8.1 Hz, 4H), 7.06 (s, 1H), 7.00 (d, *J* = 8.0 Hz, 4H), 2.38 (s, 3H), 2.29 (s, 6H), 1.89 (s, 1H), 1.49 (s, 9H).

**<sup>13</sup>C NMR** (151 MHz, CDCl<sub>3</sub>) δ 151.1, 143.2, 141.1, 137.8, 136.7, 135.5, 134.4, 130.6, 129.7, 128.6, 128.6, 127.6, 127.4, 125.9, 94.0, 73.8, 44.2, 35.3, 30.8, 21.3, 21.1.

**HRMS** (ESI): *m/z* [M+H]<sup>+</sup> calcd for [C<sub>34</sub>H<sub>35</sub>O<sub>2</sub>]<sup>+</sup> required 475.2637, found 475.2629

**1,1-di([1,1'-biphenyl]-4-yl)-3-((3-(tert-butyl)-5-methyl-[1,1'-biphenyl]-2-yl)oxy)prop-2-yn-1-ol (1m)**

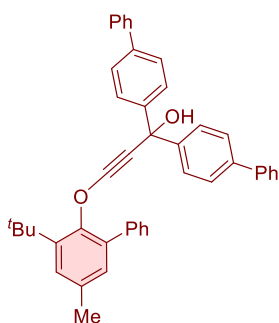

Yellow oil. (2.39 g, 40% yield).

<sup>1</sup>H NMR (600 MHz, CDCl<sub>3</sub>) δ 7.54 (t, *J* = 6.8 Hz, 6H), 7.43 (d, *J* = 8.6 Hz, 6H), 7.41 – 7.37 (m, 5H), 7.36 – 7.28 (m, 6H), 7.15 (s, 1H), 7.05 (s, 1H), 2.35 (s, 3H), 2.01 (s, 1H), 1.49 (s, 9H).

<sup>13</sup>C NMR (151 MHz, CDCl<sub>3</sub>) δ 151.1, 144.9, 141.1, 141.0, 140.2, 137.8, 135.7, 134.3, 130.6, 129.8, 128.9, 128.6, 127.7, 127.5, 127.3, 127.2, 126.8, 126.5, 94.4, 73.8, 43.9, 35.4, 30.8, 21.3.

HRMS (ESI): *m/z* [M+H]<sup>+</sup> calcd for [C<sub>44</sub>H<sub>39</sub>O<sub>2</sub>]<sup>+</sup> required 599.2950, found 599.2934.

**3-((3-(tert-butyl)-5-methyl-[1,1'-biphenyl]-2-yl)oxy)-1,1-bis(4-methoxyphenyl)prop-2-yn-1-ol (1n)**

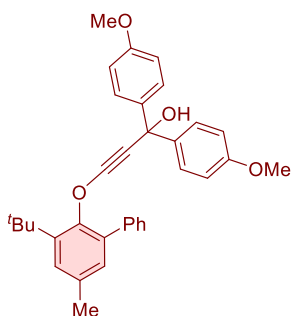

Yellow oil. (3.04 g, 60% yield).

<sup>1</sup>H NMR (600 MHz, CDCl<sub>3</sub>) δ 7.44 (dt, *J* = 15.0, 7.5 Hz, 4H), 7.35 (t, *J* = 7.1 Hz, 1H), 7.20 – 7.14 (m, 3H), 7.01 (s, 1H), 6.84 (d, *J* = 8.7 Hz, 2H), 6.67 (d, *J* = 8.5 Hz, 2H), 6.53 (d, *J* = 8.5 Hz, 2H), 6.20 (s, 1H), 3.82 (s, 3H), 3.77 (s, 3H), 2.33 (s, 3H), 1.39 (s, 9H).

<sup>13</sup>C NMR (151 MHz, CDCl<sub>3</sub>) δ 163.8, 161.2, 159.9, 159.0, 144.7, 142.0, 139.7, 136.6, 134.9, 134.1, 131.4, 130.5, 130.4, 129.7, 129.6, 128.2, 127.2, 127.0, 113.9, 113.7, 113.1, 55.5, 55.3, 34.9, 30.9, 21.3.

HRMS (ESI): *m/z* [M+H]<sup>+</sup> calcd for [C<sub>34</sub>H<sub>34</sub>KO<sub>4</sub>]<sup>+</sup> required 545.2094, found 545.2104

**4,4'-(3-((3-(tert-butyl)-5-methyl-[1,1'-biphenyl]-2-yl)oxy)-1-hydroxyprop-2-yne-1,1-diyl)dibenzonitrile (1o)**

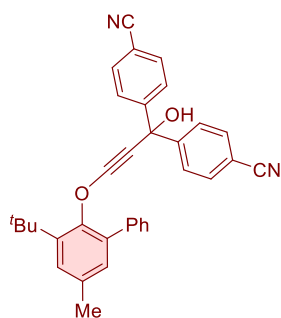

Yellow oil. (3.12 g, 63% yield).

**<sup>1</sup>H NMR** (600 MHz, CDCl<sub>3</sub>) δ 7.50 (dd, *J* = 15.1, 7.4 Hz, 6H), 7.44 (t, *J* = 7.3 Hz, 2H), 7.40 (d, *J* = 7.7 Hz, 1H), 7.30 (d, *J* = 7.8 Hz, 4H), 7.18 (s, 1H), 7.07 (s, 1H), 2.38 (s, 3H), 2.19 (s, 1H), 1.47 (s, 9H).

**<sup>13</sup>C NMR** (151 MHz, CDCl<sub>3</sub>) δ 150.7, 149.7, 141.0, 137.7, 136.2, 133.9, 132.2, 130.7, 129.7, 128.7, 127.8, 127.7, 126.6, 118.6, 111.7, 95.4, 73.3, 42.1, 35.3, 30.7, 21.3

**HRMS** (ESI): *m/z* [M+Na]<sup>+</sup> calcd for [C<sub>34</sub>H<sub>28</sub>N<sub>2</sub>NaO<sub>2</sub>]<sup>+</sup> required 519.2048, found 519.2103.

**3-((3-(tert-butyl)-5-methyl-[1,1'-biphenyl]-2-yl)oxy)-1,1-bis(3-chlorophenyl)prop-2-yn-1-ol (1p)**

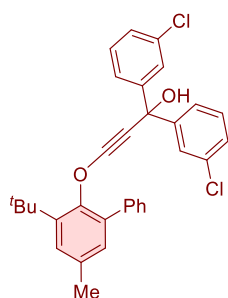

Yellow oil. (3.08 g, 60% yield).

**<sup>1</sup>H NMR** (600 MHz, CDCl<sub>3</sub>) δ 7.51 (d, *J* = 7.0 Hz, 2H), 7.42 (t, *J* = 7.6 Hz, 2H), 7.36 (t, *J* = 7.4 Hz, 1H), 7.26 (s, 2H), 7.17 – 7.08 (m, 5H), 7.05 (s, 3H), 2.35 (s, 3H), 1.99 (s, 1H), 1.47 (s, 9H).

**<sup>13</sup>C NMR** (151 MHz, CDCl<sub>3</sub>) δ 150.92, 147.30, 140.99, 137.64, 135.83, 134.22, 134.04, 130.60, 129.69, 129.38, 128.70, 127.82, 127.67, 127.58, 126.20, 124.25, 94.72, 73.22, 42.99, 35.31, 30.75, 21.27.

**HRMS** (ESI): *m/z* [M+H]<sup>+</sup> calcd for [C<sub>32</sub>H<sub>29</sub>Cl<sub>2</sub>O<sub>2</sub>]<sup>+</sup> required 515.1545, found 515.1519.

**9-(((3-(tert-butyl)-5-methyl-[1,1'-biphenyl]-2-yl)oxy)ethynyl)-9H-fluoren-9-ol (1q)**

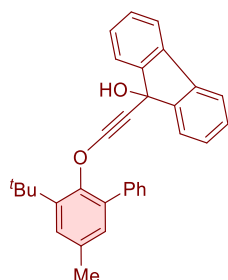

Yellow oil. (1.46 g, 33% yield).

**<sup>1</sup>H NMR** (600 MHz, CDCl<sub>3</sub>) δ 7.48 (d, *J* = 7.5 Hz, 2H), 7.44 (d, *J* = 7.6 Hz, 2H), 7.34 (t, *J* = 7.5 Hz, 2H), 7.30 – 7.23 (m, 5H), 7.20 (t, *J* = 7.4 Hz, 2H), 7.11 (s, 1H), 7.00 (s, 1H), 2.34 (s, 3H), 1.90 (s, 1H), 1.39 (s, 9H).

**<sup>13</sup>C NMR** (151 MHz, CDCl<sub>3</sub>) δ 151.0, 147.8, 141.0, 139.0, 137.7, 135.4, 134.4, 130.5, 129.6, 129.1, 128.5, 128.2, 127.5, 127.4, 124.2, 119.9, 90.4, 74.0, 40.9, 35.2, 30.7, 21.2.

**HRMS** (ESI): *m/z* [M+H]<sup>+</sup> calcd for [C<sub>32</sub>H<sub>29</sub>O<sub>2</sub>]<sup>+</sup> required 445.2168, found 445.2152.

**1-(((3-(tert-butyl)-5-methyl-[1,1'-biphenyl]-2-yl)oxy)ethynyl)cyclopentan-1-ol (1t)**

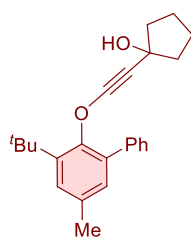

Yellow oil. (2.33 g, 67% yield).

**<sup>1</sup>H NMR** (600 MHz, CDCl<sub>3</sub>) δ 7.52 (d, *J* = 7.5 Hz, 2H), 7.45 (t, *J* = 7.5 Hz, 2H), 7.38 (t, *J* = 7.4 Hz, 1H), 7.15 (s, 1H), 7.05 (s, 1H), 2.37 (s, 3H), 1.65 – 1.59 (m, 2H), 1.55 (d, *J* = 9.4 Hz, 2H), 1.47 (d, *J* = 3.9 Hz, 4H), 1.45 (s, 9H).

**<sup>13</sup>C NMR** (151 MHz, CDCl<sub>3</sub>) δ 150.8, 140.4, 137.6, 134.7, 133.8, 130.0, 129.2, 127.9, 126.9, 126.8, 90.4, 73.5, 43.9, 41.8, 34.7, 30.2, 22.8, 20.7.

**HRMS** (ESI): *m/z* [M+Na]<sup>+</sup> calcd for [C<sub>24</sub>H<sub>28</sub>NaO<sub>2</sub>]<sup>+</sup> required 371.1987, found 371.1990.

**1-(((3-(tert-butyl)-5-methyl-[1,1'-biphenyl]-2-yl)oxy)ethynyl)cyclohexan-1-ol (1u)**

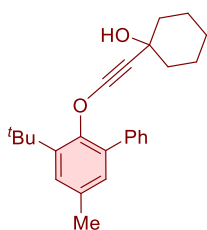

Yellow oil. (1.41 g, 39% yield).

**<sup>1</sup>H NMR** (600 MHz, CDCl<sub>3</sub>) δ 7.53 (d, *J* = 7.6 Hz, 2H), 7.45 (t, *J* = 7.6 Hz, 2H), 7.38 (t, *J* = 7.4 Hz, 1H), 7.15 (s, 1H), 7.05 (s, 1H), 2.37 (s, 3H), 1.46 (s, 9H), 1.45 – 1.41 (m, 3H), 1.38 – 1.28 (m, 2H), 1.28 – 1.23 (m, 2H), 1.13 (qd, *J* = 10.0, 3.4 Hz, 2H), 1.04 (q, *J* = 10.9 Hz, 1H).

**<sup>13</sup>C NMR** (151 MHz, CDCl<sub>3</sub>) δ 151.3, 141.0, 138.1, 135.3, 134.4, 130.6, 129.7, 128.5, 127.5, 127.4, 91.6, 68.3, 43.9, 40.2, 35.3, 30.7, 25.3, 23.5, 21.3.

**HRMS** (ESI): *m/z* [M+H]<sup>+</sup> calcd for [C<sub>25</sub>H<sub>31</sub>O<sub>2</sub>]<sup>+</sup> required 363.2324, found 363.2314.

**3-(2-(tert-butyl)-4,6-dimethylphenoxy)-1,1-diphenylprop-2-yn-1-ol (1v)**

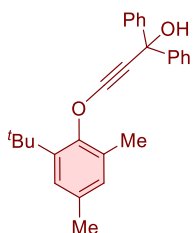

Yellow oil. (3.07 g, 80% yield).

**<sup>1</sup>H NMR** (600 MHz, CDCl<sub>3</sub>) δ 7.56 (d, *J* = 7.7 Hz, 4H), 7.27 (t, *J* = 7.5 Hz, 4H), 7.21 (q, *J* = 7.5 Hz, 2H), 6.97 (s, 1H), 6.86 (s, 1H), 2.61 (s, 1H), 2.38 (s, 3H), 2.27 (s, 3H), 1.43 (s, 9H).

**<sup>13</sup>C NMR** (151 MHz, CDCl<sub>3</sub>) δ 152.5, 146.1, 140.7, 135.4, 130.7, 130.4, 128.2, 127.5, 126.2, 125.9, 94.7, 74.7, 43.0, 35.1, 30.9, 21.2, 16.6.

**HRMS** (ESI): *m/z* [M+H]<sup>+</sup> calcd for [C<sub>27</sub>H<sub>29</sub>O<sub>2</sub>]<sup>+</sup> required 385.2168, found 385.2177.

**(((3-(tert-butyl)-5-methyl-[1,1'-biphenyl]-2-yl)oxy)ethynyl)trimethylsilane (1x)**

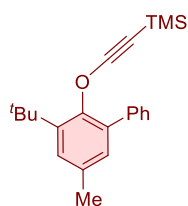

Yellow oil. (2.01 g, 60% yield).

**<sup>1</sup>H NMR (600 MHz, CDCl<sub>3</sub>)** δ 7.48 (d, *J* = 7.7 Hz, 2H), 7.42 (t, *J* = 7.6 Hz, 2H), 7.36 (t, *J* = 7.3 Hz, 1H), 7.15 (s, 1H), 7.04 (s, 1H), 2.37 (s, 3H), 1.46 (s, 9H), -0.15 (s, 9H).

**<sup>13</sup>C NMR (151 MHz, CDCl<sub>3</sub>)** δ 150.8, 141.0, 137.7, 135.3, 134.8, 130.6, 129.6, 128.4, 127.4, 127.3, 106.6, 38.9, 35.3, 30.8, 21.3, 0.4.

**HRMS (ESI):** *m/z* [M+H]<sup>+</sup> calcd for [C<sub>22</sub>H<sub>28</sub>OSi]<sup>+</sup> required 336.1909, found 336.1929.

**(((3-(tert-butyl)-4',5-dimethyl-[1,1'-biphenyl]-2-yl)oxy)ethynyl)trimethylsilane (1y)**

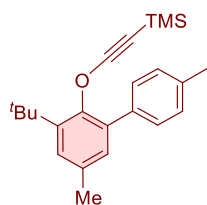

Yellow oil. (2.33 g, 67% yield).

**<sup>1</sup>H NMR (600 MHz, CDCl<sub>3</sub>)** δ 7.37 (d, *J* = 8.0 Hz, 2H), 7.24 (d, *J* = 7.7 Hz, 2H), 7.13 (s, 1H), 7.04 (s, 1H), 2.42 (s, 3H), 2.36 (s, 3H), 1.46 (s, 9H).

**<sup>13</sup>C NMR (151 MHz, CDCl<sub>3</sub>)** δ 150.8, 140.8, 137.1, 135.2, 134.7, 130.6, 129.4, 129.1, 127.1, 106.5, 39.0, 35.3, 30.7, 21.3, 21.3, 0.3.

**HRMS (ESI):** *m/z* [M+H]<sup>+</sup> calcd for [C<sub>23</sub>H<sub>31</sub>OSi]<sup>+</sup> required 351.2144, found 351.2141.

**(((3,4'-di-tert-butyl-5-methyl-[1,1'-biphenyl]-2-yl)oxy)ethynyl)trimethylsilane (1z)**

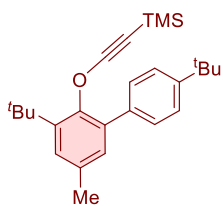

Yellow oil. (2.59 g, 66% yield).

**<sup>1</sup>H NMR (400 MHz, Chloroform-*d*)**  $\delta$  7.47 – 7.40 (m, 4H), 7.12 (s, 1H), 7.05 (s, 1H), 2.36 (s, 3H), 1.45 (s, 9H), 1.38 (s, 9H), -0.16 (s, 9H).

**<sup>13</sup>C NMR (101 MHz, CDCl<sub>3</sub>)**  $\delta$  150.9, 150.2, 140.8, 135.3, 134.6, 130.7, 129.1, 127.1, 125.4, 106.7, 38.7, 35.3, 34.7, 31.6, 30.7, 21.3, 0.5.

**HRMS (ESI):**  $m/z$  [M+NH<sub>4</sub>]<sup>+</sup> calcd for [C<sub>26</sub>H<sub>40</sub>NOSi]<sup>+</sup> required 410.2879, found 410.2852.

**(((3-(tert-butyl)-5-methyl-[1,1':4',1''-terphenyl]-2-yl)oxy)ethynyl)trimethylsilane (1za)**

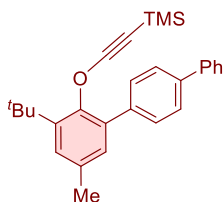

Yellow oil. (3.00 g, 73% yield).

**<sup>1</sup>H NMR (600 MHz, CDCl<sub>3</sub>)**  $\delta$  7.68 – 7.64 (m, 4H), 7.58 (d,  $J$  = 8.1 Hz, 2H), 7.48 (t,  $J$  = 7.6 Hz, 2H), 7.41 – 7.35 (m, 1H), 7.17 (s, 1H), 7.10 (s, 1H), 2.39 (s, 3H), 1.48 (s, 9H), -0.16 (s, 9H).

**<sup>13</sup>C NMR (151 MHz, CDCl<sub>3</sub>)**  $\delta$  150.9, 141.3, 141.0, 140.4, 136.7, 135.4, 134.3, 130.6, 129.9, 128.9, 127.4, 127.4, 127.3, 127.2, 106.6, 39.3, 35.3, 30.7, 21.3, 0.4.

**HRMS (ESI):**  $m/z$  [M+Na]<sup>+</sup> calcd for [C<sub>28</sub>H<sub>32</sub>NaOSi]<sup>+</sup> required 435.2120, found 435.2115.

**(((3-(tert-butyl)-4'-chloro-5-methyl-[1,1'-biphenyl]-2-yl)oxy)ethynyl)trimethylsilane (1zb)**

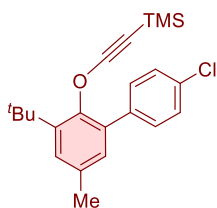

Yellow oil. (2.22 g, 60% yield).

**<sup>1</sup>H NMR (600 MHz, CDCl<sub>3</sub>)** δ 7.47 – 7.36 (m, 4H), 7.16 (s, 1H), 7.01 (s, 1H), 2.37 (s, 3H), 1.45 (s, 9H), -0.11 (s, 9H).

**<sup>13</sup>C NMR (151 MHz, CDCl<sub>3</sub>)** δ 150.7, 141.1, 136.1, 135.5, 133.6, 133.5, 130.9, 130.3, 128.6, 127.7, 106.3, 39.4, 35.3, 30.7, 21.3, 0.3.

**HRMS (ESI):** m/z [M+Na]<sup>+</sup> calcd for [C<sub>22</sub>H<sub>27</sub>ClNaOSi]<sup>+</sup> required 393.1417, found 393.1395.

**(((3-(tert-butyl)-5-methyl-4'-(trifluoromethyl)-[1,1'-biphenyl]-2-yl)oxy)ethynyl)trimethylsilane (1zc)**

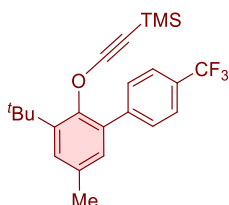

Yellow oil. (3.23 g, 80% yield).

**<sup>1</sup>H NMR (600 MHz, CDCl<sub>3</sub>)** δ 7.75 – 7.67 (m, 2H), 7.61 (dd, J = 8.4, 4.0 Hz, 2H), 7.21 (s, 1H), 7.04 (s, 1H), 2.39 (s, 3H), 1.47 (s, 9H), -0.15 (s, 9H).

**<sup>19</sup>F NMR (565 MHz, Chloroform-*d*)** δ -62.48.

**<sup>13</sup>C NMR (151 MHz, CDCl<sub>3</sub>)** δ 150.8, 141.5, 141.3, 135.7, 133.3, 130.3, 129.9, 129.8, 128.2, 125.4(q, <sup>1</sup>J<sub>C-F</sub> = 272.8 Hz), 123.6, 106.2, 39.5, 35.3, 30.7, 21.3, 0.2.

**HRMS (ESI):** m/z [M+Na]<sup>+</sup> calcd for [C<sub>23</sub>H<sub>27</sub>F<sub>3</sub>NaOSi]<sup>+</sup> required 427.1681, found 427.1668.

**((2-(tert-butyl)-4-methyl-6-(naphthalen-1-yl)phenoxy)ethynyl)trimethylsilane (1zd)**

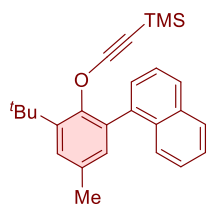

Yellow oil. (0.77 g, 20% yield).

**<sup>1</sup>H NMR (400 MHz, Chloroform-*d*)**  $\delta$  7.93 (s, 1H), 7.91 – 7.85 (m, 3H), 7.62 (d,  $J = 8.4$  Hz, 1H), 7.52 – 7.47 (m, 2H), 7.18 (d,  $J = 2.9$  Hz, 1H), 7.15 (d,  $J = 2.9$  Hz, 1H), 2.40 (s, 3H), 1.48 (s, 9H), -0.42 (s, 9H).

**<sup>13</sup>C NMR (101 MHz, CDCl<sub>3</sub>)**  $\delta$  151.0, 140.9, 135.4, 135.2, 134.6, 133.7, 132.8, 130.8, 128.5, 128.3, 127.8, 127.7 (2C), 127.4, 126.1, 106.3, 39.2, 35.3, 30.7, 21.3, -0.0.

**HRMS (ESI):**  $m/z$  [M+H]<sup>+</sup> calcd for [C<sub>26</sub>H<sub>31</sub>OSi]<sup>+</sup> required 387.2144, found 387.2138.

**((3-(tert-butyl)-3',5-dimethyl-[1,1'-biphenyl]-2-yl)oxy)ethynyl)trimethylsilane (1ze)**

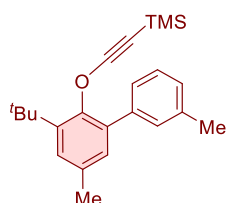

Yellow oil. (1.96 g, 56% yield).

**<sup>1</sup>H NMR (400 MHz, Chloroform-*d*)**  $\delta$  7.33 – 7.27 (m, 3H), 7.18 (d,  $J = 7.0$  Hz, 1H), 7.14 (s, 1H), 7.04 (s, 1H), 2.42 (s, 3H), 2.36 (s, 3H), 1.46 (s, 9H), -0.14 (s, 9H).

**<sup>13</sup>C NMR (101 MHz, CDCl<sub>3</sub>)**  $\delta$  150.7, 140.8, 137.8, 137.5, 135.2, 134.8, 130.6, 130.2, 128.3, 128.2, 127.2, 126.7, 106.6, 38.9, 35.3, 30.7, 21.6, 21.3, 0.3.

**HRMS (ESI):**  $m/z$  [M+H]<sup>+</sup> calcd for [C<sub>23</sub>H<sub>31</sub>OSi]<sup>+</sup> required 351.2144, found 351.2141.

**(((3,5-di-tert-butyl-[1,1'-biphenyl]-2-yl)oxy)ethynyl)trimethylsilane (1zf)**

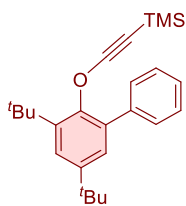

Yellow oil. (2.38 g, 60% yield).

**<sup>1</sup>H NMR (600 MHz, CDCl<sub>3</sub>)** δ 7.56 – 7.35 (m, 6H), 7.23 (ddd, J = 11.3, 4.4, 2.2 Hz, 1H), 1.50 (s, 9H), 1.37 (s, 9H), -0.12 (s, 9H).

**<sup>13</sup>C NMR (151 MHz, CDCl<sub>3</sub>)** δ 150.5, 148.4, 140.3, 138.1, 134.2, 129.7, 128.4, 127.4, 127.3, 123.8, 106.5, 39.0, 35.6, 34.9, 31.7, 30.8, 0.4.

**HRMS (ESI):** m/z [M+H]<sup>+</sup> calcd for [C<sub>25</sub>H<sub>35</sub>OSi]<sup>+</sup> required 379.2457, found 379.2450.

**(((3-(tert-butyl)-5-methyl-[1,1'-biphenyl]-2-yl)oxy)ethynyl)dimethyl(phenyl)silane (1zg)**

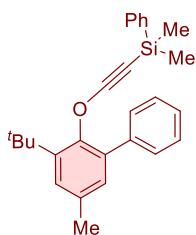

Yellow oil. (2.03 g, 51% yield).

**<sup>1</sup>H NMR (600 MHz, CDCl<sub>3</sub>)** δ 7.51 (ddt, J = 8.0, 2.9, 1.4 Hz, 2H), 7.45 – 7.39 (m, 2H), 7.39 – 7.26 (m, 6H), 7.17 (s, 1H), 7.06 (s, 1H), 2.38 (s, 3H), 1.49 (s, 9H), 0.11 (s, 6H).

**<sup>13</sup>C NMR (151 MHz, CDCl<sub>3</sub>)** δ 150.7, 141.0, 138.3, 137.5, 135.5, 134.8, 133.8, 130.7, 129.6, 129.0, 128.5, 127.6, 127.5, 127.4, 108.0, 37.0, 35.3, 30.8, 21.3, -0.3.

**HRMS (ESI):** m/z [M+H]<sup>+</sup> calcd for [C<sub>27</sub>H<sub>31</sub>OSi]<sup>+</sup> required 399.2144, found 399.2133.

**((2-(tert-butyl)-4,6-dimethylphenoxy)ethynyl)trimethylsilane (1zh)**

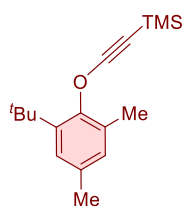

Yellow oil. (1.54 g, 56% yield).

**<sup>1</sup>H NMR (400 MHz, Chloroform-*d*)**  $\delta$  7.00 (s, 1H), 6.91 (s, 1H), 2.44 (s, 3H), 2.31 (s, 3H), 1.43 (s, 9H), 0.14 (s, 9H).

**<sup>13</sup>C NMR (101 MHz, CDCl<sub>3</sub>)**  $\delta$  152.1, 140.6, 135.3, 130.6 (2C), 125.9, 107.2, 38.3, 35.1, 30.8, 21.2, 16.6, 0.7

**HRMS (ESI):**  $m/z$  [M+H]<sup>+</sup> calcd for [C<sub>17</sub>H<sub>27</sub>OSi]<sup>+</sup> required 275.1831, found 275.1484.

**1-(((3-(tert-butyl)-5-methyl-[1,1'-biphenyl]-2-yl)oxy)ethynyl)cyclobutan-1-ol (1zi)**

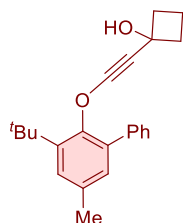

Colorless oil. (2.14 g, 64% yield).

**<sup>1</sup>H NMR (400 MHz, Chloroform-*d*)**  $\delta$  7.56 – 7.50 (m, 2H), 7.45 (t, *J* = 7.5 Hz, 2H), 7.41 – 7.35 (m, 1H), 7.15 (s, 1H), 7.05 (s, 1H), 2.37 (s, 3H), 2.00 – 1.87 (m, 4H), 1.45 (s, 9H), 1.35 (td, *J* = 8.4, 2.9 Hz, 2H).

**<sup>13</sup>C NMR (101 MHz, CDCl<sub>3</sub>)**  $\delta$  151.2, 140.9, 138.0, 135.3, 134.3, 130.5, 129.6, 128.5, 127.5, 127.4, 91.1, 67.4, 44.1, 38.6, 35.3, 30.7, 21.3, 12.6.

**HRMS (ESI):**  $m/z$  [M+H]<sup>+</sup> calcd for [C<sub>23</sub>H<sub>27</sub>O<sub>2</sub>]<sup>+</sup> required 335.2011, found 335.2009.

**4-((3-(tert-butyl)-5-methyl-[1,1'-biphenyl]-2-yl)oxy)-2-methylbut-3-yn-2-ol (1zj)**

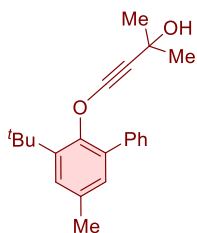

Colorless oil. (1.93 g, 60% yield).

**<sup>1</sup>H NMR (600 MHz, Chloroform-*d*)**  $\delta$  7.54 – 7.49 (m, 2H), 7.45 (t, *J* = 7.6 Hz, 2H), 7.38 (dd, *J* = 8.7, 6.1 Hz, 1H), 7.14 (s, 1H), 7.05 (s, 1H), 2.37 (s, 3H), 1.44 (s, 9H), 1.11 (s, 6H).

**<sup>13</sup>C NMR (151 MHz, CDCl<sub>3</sub>)**  $\delta$  151.2, 140.9, 138.2, 135.2, 134.2, 130.6, 129.7, 128.5, 127.4 (2C), 90.0, 64.7, 45.4, 35.3, 31.6, 30.7, 21.2.

**HRMS (ESI):** *m/z* [M+H]<sup>+</sup> calcd for [C<sub>22</sub>H<sub>27</sub>O<sub>2</sub>]<sup>+</sup> required 323.2011, found 323.2002.

**4-((3-(tert-butyl)-5-methyl-[1,1'-biphenyl]-2-yl)oxy)-2-methylbut-3-yn-2-ol (1zk)**

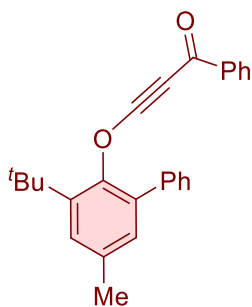

Yellow oil. (1.48 g, 40% yield).

**<sup>1</sup>H NMR (600 MHz, Chloroform-*d*)**  $\delta$  7.71 (d, *J* = 7.5 Hz, 2H), 7.53 (d, *J* = 7.4 Hz, 2H), 7.50 (t, *J* = 7.4 Hz, 1H), 7.39 – 7.33 (m, 4H), 7.26 (t, *J* = 7.4 Hz, 1H), 7.21 (s, 1H), 7.12 (s, 1H), 2.41 (s, 3H), 1.49 (s, 9H).

**<sup>13</sup>C NMR (151 MHz, CDCl<sub>3</sub>)**  $\delta$  177.8, 150.7, 141.0, 137.3, 136.6, 136.5, 134.5, 133.3, 130.7, 129.5, 129.3, 128.7, 128.2, 128.1, 127.7, 101.5, 44.0, 35.3, 30.8, 21.3.

**HRMS (ESI):** *m/z* [M+H]<sup>+</sup> calcd for [C<sub>26</sub>H<sub>25</sub>O<sub>2</sub>]<sup>+</sup> required 369.1855, found 369.1846.

**3-((3,5-dimethyl-[1,1'-biphenyl]-2-yl)oxy)-1,1-diphenylprop-2-yn-1-ol (1zo)**

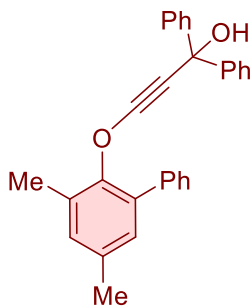

Yellow oil. (1.07 g, 53% yield).

$^1\text{H NMR}$  (400 MHz,  $\text{CDCl}_3$ )  $\delta$  7.63 (d,  $J = 6.6$  Hz, 2H), 7.57 – 7.40 (m, 7H), 7.35 – 7.22 (m, 6H), 7.09 (d,  $J = 13.5$  Hz, 2H), 2.48 (s, 3H), 2.43 (s, 1H), 2.40 (s, 3H).

$^{13}\text{C NMR}$  (101 MHz,  $\text{CDCl}_3$ )  $\delta$  150.2, 145.9, 137.3, 135.9, 133.1, 131.4, 129.8, 129.6, 129.4, 128.5, 128.0, 127.7, 127.2, 125.9, 94.3, 74.2, 42.2, 20.9, 16.3.

**HRMS** (ESI):  $m/z$   $[\text{M}+\text{H}]^+$  calcd for  $[\text{C}_{29}\text{H}_{25}\text{O}_2]^+$  required 405.1855, found 405.1865.

**Table S15. The reaction of 1zo with 2a**

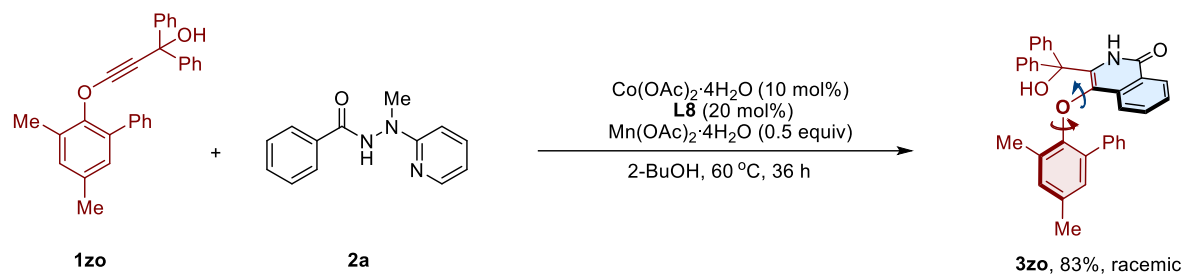

## 4. General procedure for synthesis of products 3 and 5.

### 4.1 General procedure for synthesis of products 3 and racemic products 3

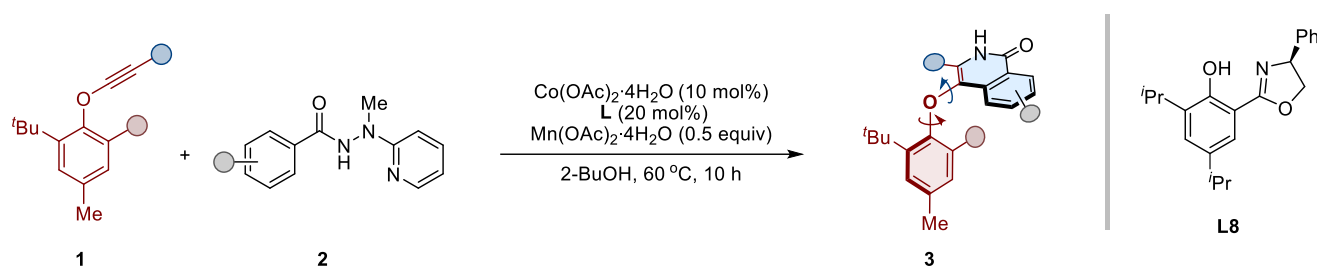

An oven-dried Schleck tube charged with magnetic stirrer was added **1** (0.12 mmol, 1.2 equiv), benzamide **2** (0.1 mmol, 1.0 eq),  $\text{Co(OAc)}_2\cdot 4\text{H}_2\text{O}$  (0.01 mmol, 2.5 mg, 10 mol%), **L8** (0.02 mmol, 6.6 mg, 20 mol%),  $\text{Mn(OAc)}_2\cdot 4\text{H}_2\text{O}$  (0.05 mmol, 13 mg, 0.5 equiv), and anhydrous solvent 2-BuOH (1 mL). Then, the reaction system was placed in preheated metal bath stirred at 60 °C for 36 h. After the reaction was completed, the mixture was cooled to room temperature and diluted with  $\text{CH}_2\text{Cl}_2$  and filtered over a Celite. The reaction solution was concentrated in vacuum and purified on silica gel chromatography to afford the corresponding products **3**.

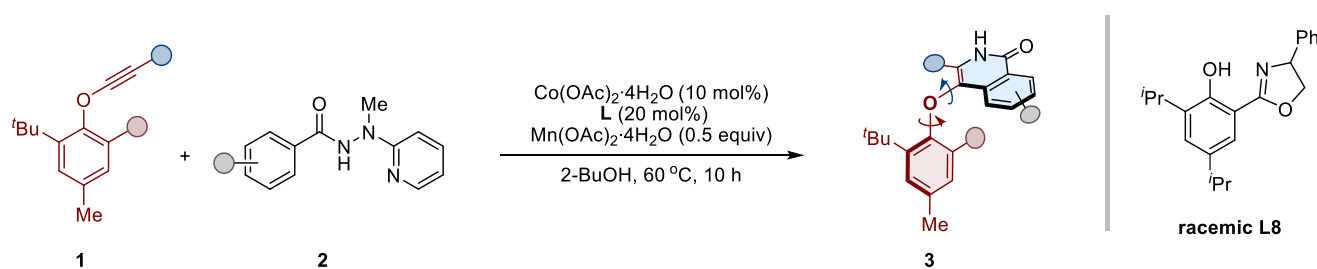

An oven-dried Schleck tube charged with magnetic stirrer was added **1** (0.12 mmol, 1.2 equiv), benzamide **2** (0.1 mmol, 1.0 eq),  $\text{Co(OAc)}_2\cdot 4\text{H}_2\text{O}$  (0.01 mmol, 2.5 mg, 10 mol%), racemic **L8** (0.02 mmol, 6.6 mg, 20 mol%),  $\text{Mn(OAc)}_2\cdot 4\text{H}_2\text{O}$  (0.05 mmol, 13 mg, 0.5 equiv), and anhydrous solvent 2-BuOH (1 mL). Then, the reaction system was placed in preheated metal bath stirred at 60 °C for 36 h. After the reaction was completed, the mixture was cooled to room temperature and diluted with  $\text{CH}_2\text{Cl}_2$  and filtered over a Celite. The reaction solution was concentrated in vacuum and purified on silica gel chromatography to afford the corresponding products **3**.

## 4.2 General procedure for synthesis of products **5** and racemic products **5**

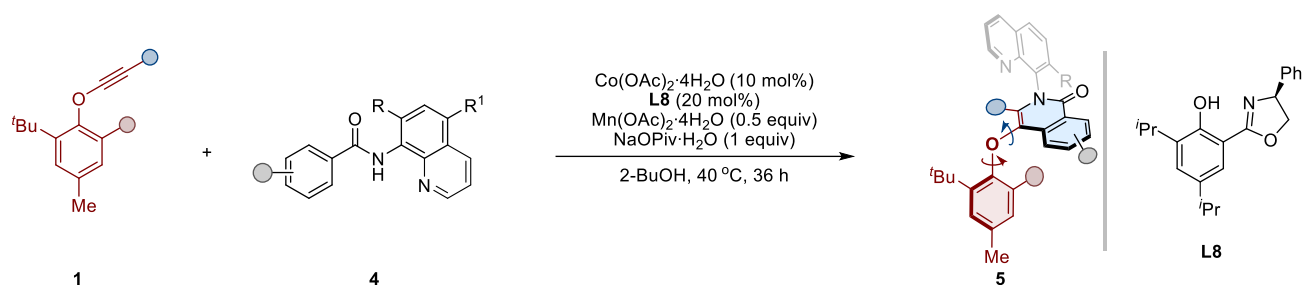

An oven-dried Schleck tube charged with magnetic stirrer was added **1** (0.12 mmol, 1.2 equiv), benzamide **4** (0.1 mmol, 1.0 eq),  $\text{Co(OAc)}_2 \cdot 4\text{H}_2\text{O}$  (0.01 mmol, 2.5 mg, 10 mol%), **L8** (0.02 mmol, 6.6 mg, 20 mol%),  $\text{Mn(OAc)}_2 \cdot 4\text{H}_2\text{O}$  (0.05 mmol, 13 mg, 0.5 equiv),  $\text{NaOPiv} \cdot \text{H}_2\text{O}$  (0.1 mmol, 14.4 mg, 1.0 equiv), and anhydrous solvent 2-BuOH (1 mL). Then, the reaction system was placed in preheated metal bath stirred at 40 °C for 36 h. After the reaction was completed, The mixture was cooled to room temperature and diluted with  $\text{CH}_2\text{Cl}_2$  and filtered over a Celite. The reaction solution was concentrated in vacuum and purified on silica gel chromatography to afford the corresponding products **5**.

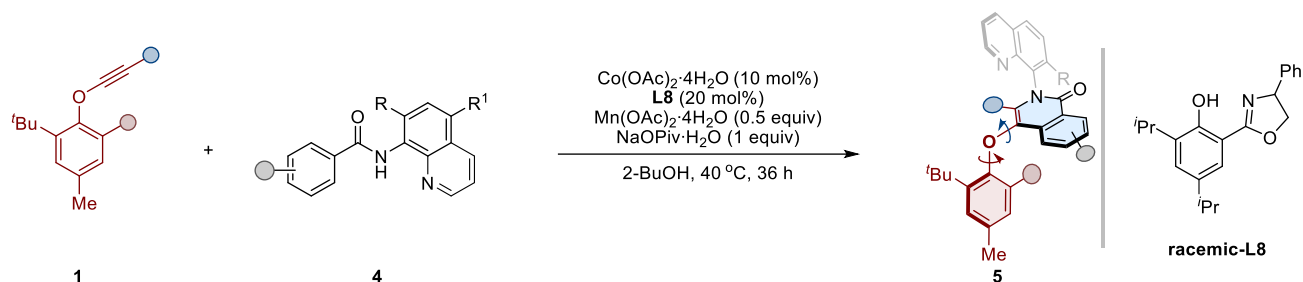

An oven-dried Schleck tube charged with magnetic stirrer was added **1** (0.12 mmol, 1.2 equiv), benzamide **4** (0.1 mmol, 1.0 eq),  $\text{Co(OAc)}_2 \cdot 4\text{H}_2\text{O}$  (0.01 mmol, 2.5 mg, 10 mol%), racemic **L8** (0.02 mmol, 6.6 mg, 20 mol%),  $\text{Mn(OAc)}_2 \cdot 4\text{H}_2\text{O}$  (0.05 mmol, 13 mg, 0.5 equiv),  $\text{NaOPiv} \cdot \text{H}_2\text{O}$  (0.1 mmol, 14.4 mg, 1.0 equiv), and anhydrous solvent 2-BuOH (1 mL). Then, the reaction system was placed in preheated metal bath stirred at 40 °C for 36 h. After the reaction was completed, The mixture was cooled to room temperature and diluted with  $\text{CH}_2\text{Cl}_2$  and filtered over a Celite. The reaction solution was concentrated in vacuum and purified on silica gel chromatography to afford the corresponding products **5**.

## 5. Mechanistic studies

### 5.1 H/D exchange experiments

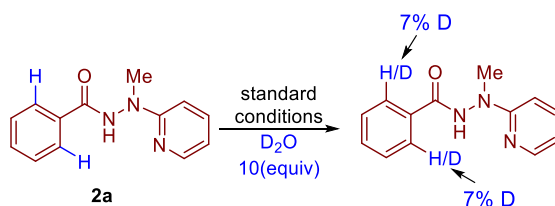

An oven dried Schlenk tube charged with magnetic stirrer added benzamide **2a** (0.1 mmol, 23 mg, 1.0 eq),  $Co(OAc)_2 \cdot 4H_2O$  (0.01 mmol, 2.5 mg, 10 mol%), **L8** (0.02 mmol, 6.6 mg, 20 mol%),  $Mn(OAc)_2 \cdot 4H_2O$  (0.05 mmol, 13 mg, 0.5 equiv),  $D_2O$  (10 equiv) with subsequent addition of 2-BuOH (1 mL) as solvent. Then, the reaction system was placed in preheated metal bath stirred at 60 °C for 36 h. After the reaction was completed, the reaction mixture was diluted with DCM and filtered through a pad of Celite. The reaction solution was detected by TLC, and then concentrated in vacuum. The product was purified by flash column chromatography using petroleum ether/ethyl acetate (1:1) as eluent.  $^1H$  NMR analysis showed that the D contents in the recovered amide were 7%.

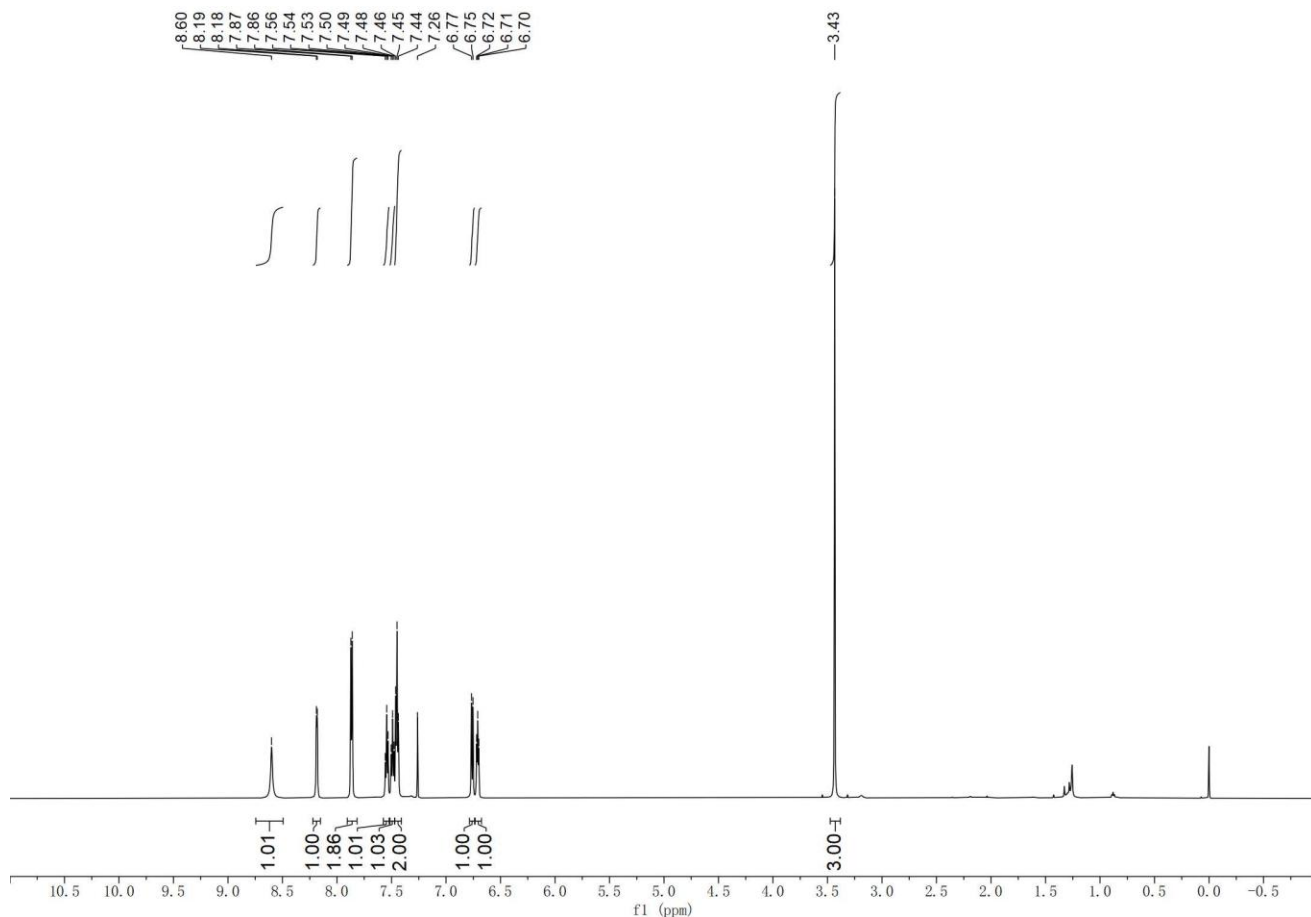

$^1H$  NMR spectrum of recovered amide **2a**

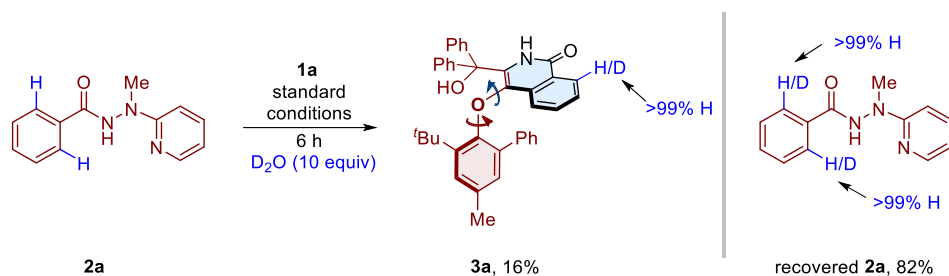

An oven-dried schlenk tube charged with magnetic stirrer added benzamide **2a** (0.1 mmol), **1a** (0.12 mmol),  $\text{Co(OAc)}_2 \cdot 4\text{H}_2\text{O}$  (0.01 mmol, 2.5 mg, 10 mol%), **L8** (0.02 mmol, 6.6 mg, 20 mol%),  $\text{Mn(OAc)}_2 \cdot 4\text{H}_2\text{O}$  (0.05 mmol, 13 mg, 0.5 equiv),  $\text{D}_2\text{O}$  (10 equiv) with subsequent addition of 2-BuOH (1 mL) as solvent. Then, the reaction system was placed in preheated metal bath stirred at 60 °C for 6 h. After the reaction was completed, the reaction mixture was diluted with DCM and filtered through a pad of Celite. The reaction solution was detected by TLC, and then concentrated in vacuum. The product was purified by flash column chromatography using petroleum ether/ethyl acetate (1:1) as eluent.  $^1\text{H}$  NMR analysis showed that the H contents in the **3a** and recovered amide were >99%.

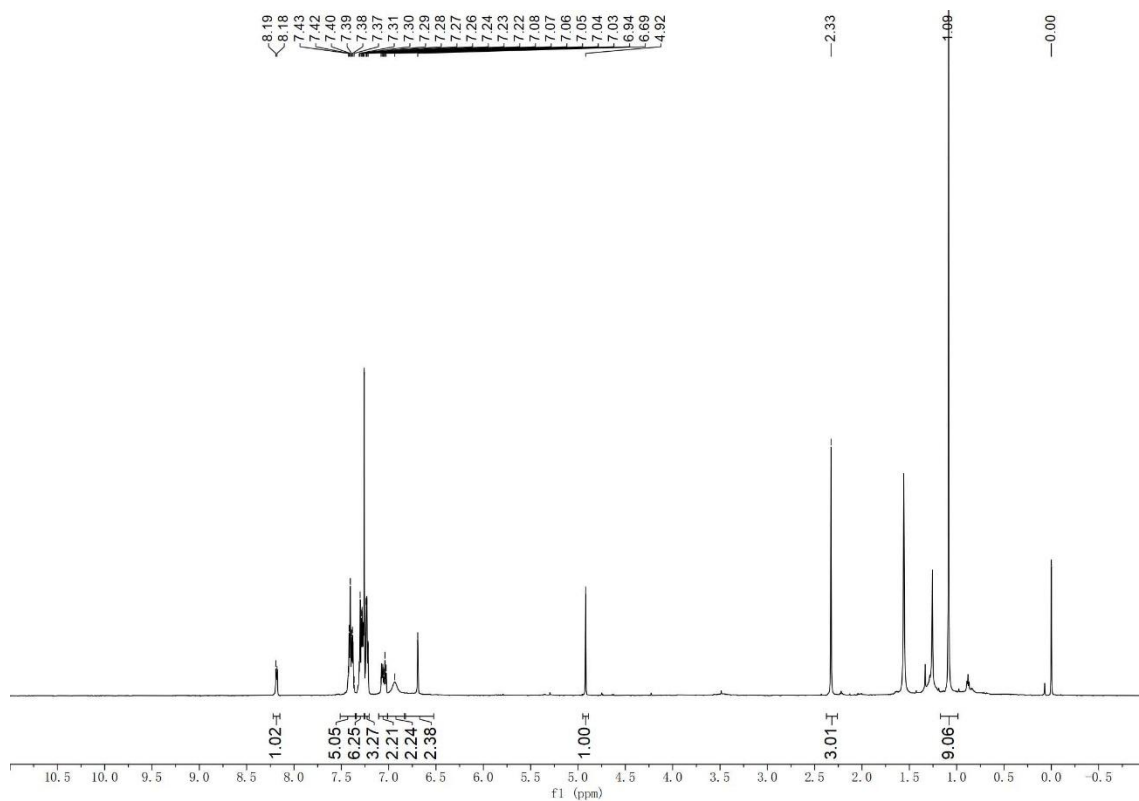

$^1\text{H}$  NMR spectrum of product **3a**

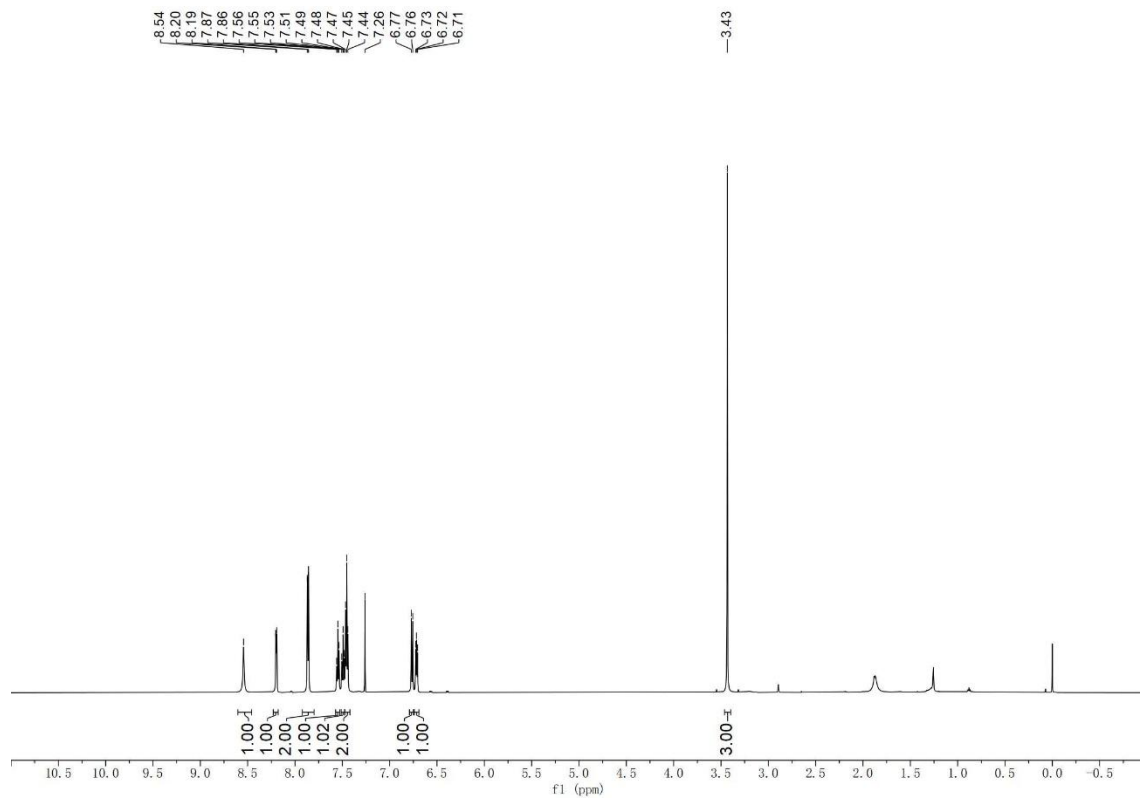

<sup>1</sup>H NMR spectrum of recovered amide **2a**

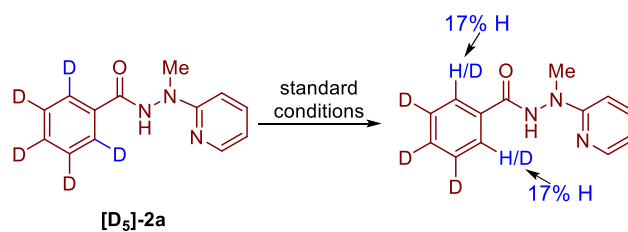

An oven dried Schlenk tube charged with magnetic stirrer added Deuterated benzamide **[D<sub>5</sub>]-2a** (0.1 mmol, 23 mg, 1.0 eq), Co(OAc)<sub>2</sub>·4H<sub>2</sub>O (0.01 mmol, 2.5 mg, 10 mol%), **L8** (0.02 mmol, 6.6 mg, 20 mol%), Mn(OAc)<sub>2</sub>·4H<sub>2</sub>O (0.05 mmol, 13 mg, 0.5 equiv) with subsequent addition of 2-BuOH (1 mL) as solvent. Then, the reaction system was placed in preheated metal bath stirred at 60 °C for 36 h. After the reaction was completed, the reaction mixture was diluted with DCM and filtered through a pad of Celite. The reaction solution was detected by TLC, and then concentrated in vacuum. The product was purified by flash column chromatography using petroleum ether/ethyl acetate (1:1) as eluent. <sup>1</sup>H NMR analysis showed that the H contents in the recovered amide were 17%.

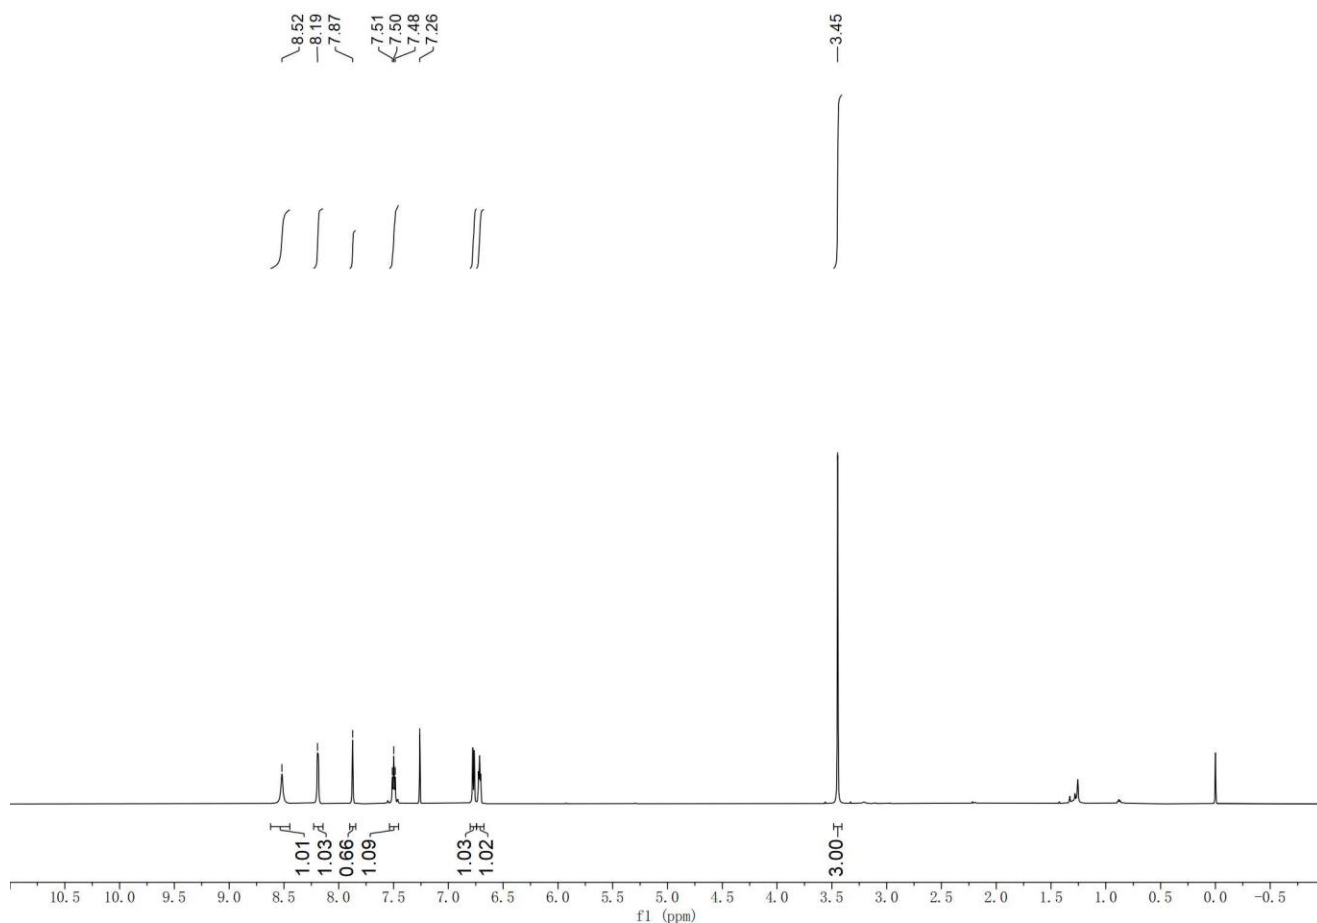

<sup>1</sup>H NMR spectrum of recovered amide **[D<sub>5</sub>]-2a**

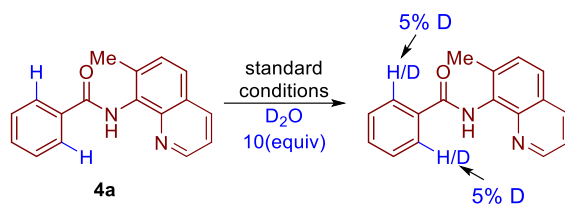

An oven dried Schlenk tube charged with magnetic stirrer added benzamide **4a** (0.1 mmol, 26 mg, 1.0 eq),  $\text{Co}(\text{OAc})_2 \cdot 4\text{H}_2\text{O}$  (0.01 mmol, 2.5 mg, 10 mol%), **L8** (0.02 mmol, 6.6 mg, 20 mol%),  $\text{Mn}(\text{OAc})_2 \cdot 4\text{H}_2\text{O}$  (0.05 mmol, 13 mg, 0.5 equiv),  $\text{D}_2\text{O}$  (10 equiv) with subsequent addition of 2-BuOH (1 mL) as solvent. Then, the reaction system was placed in preheated metal bath stirred at 40 °C for 36 h. After the reaction was completed, the reaction mixture was diluted with DCM and filtered through a pad of Celite. The reaction solution was detected by TLC, and then concentrated in vacuum. The product was purified by flash column chromatography using petroleum ether/ethyl acetate (2:1) as eluent.  $^1\text{H}$  NMR analysis showed that the D contents in the recovered amide were 5%.

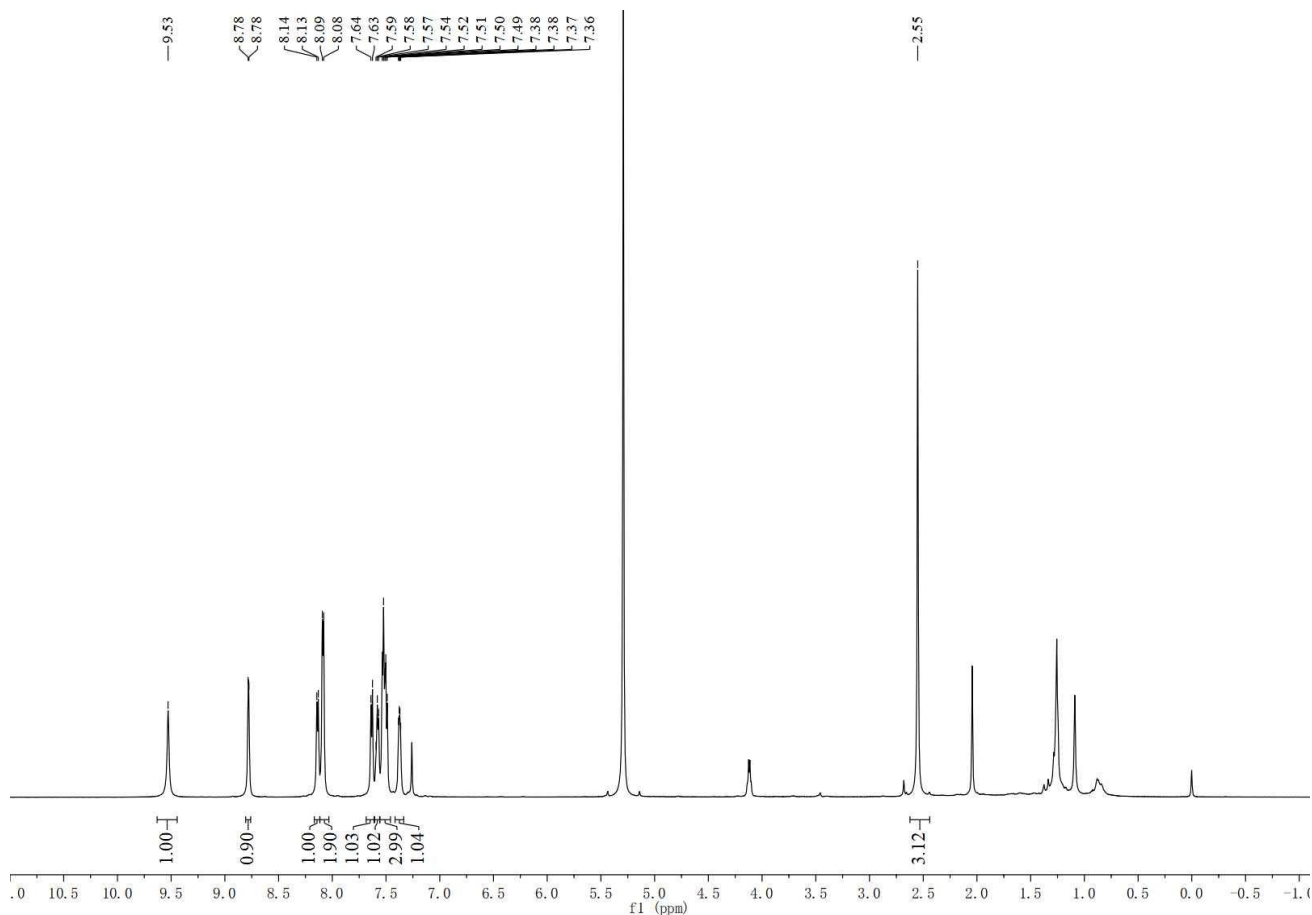

$^1\text{H}$  NMR spectrum of recovered amide **4a**

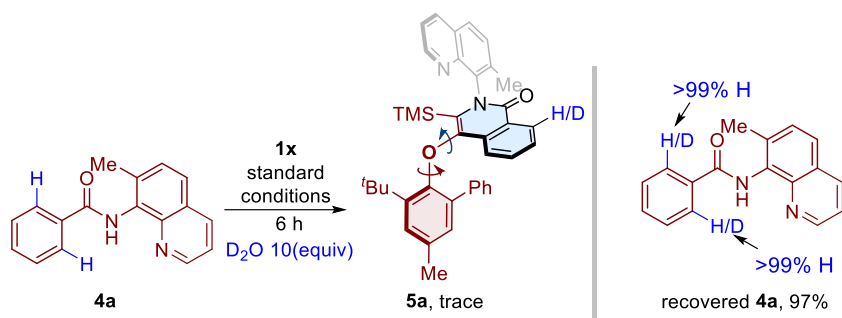

An oven-dried schlenk tube charged with magnetic stirrer added benzamide **4a** (0.1 mmol), **1x** (0.12 mmol),  $Co(OAc)_2 \cdot 4H_2O$  (0.01 mmol, 2.5 mg, 10 mol%), **L8** (0.02 mmol, 6.6 mg, 20 mol%),  $Mn(OAc)_2 \cdot 4H_2O$  (0.05 mmol, 13 mg, 0.5 equiv),  $NaOPiv \cdot H_2O$  (0.1 mmol, 14.4 mg, 1 equiv),  $D_2O$  (10 equiv) with subsequent addition of 2-BuOH (1 mL) as solvent. Then, the reaction system was placed in preheated metal bath stirred at 40 °C for 6 h. After the reaction was completed, the reaction mixture was diluted with DCM and filtered through a pad of Celite. The reaction solution was detected by TLC, and then concentrated in vacuum. The product was purified by flash column chromatography using petroleum ether/ethyl acetate (2:1) as eluent.  $^1H$  NMR analysis showed that the H contents in the **5a** and recovered amide were >99%.

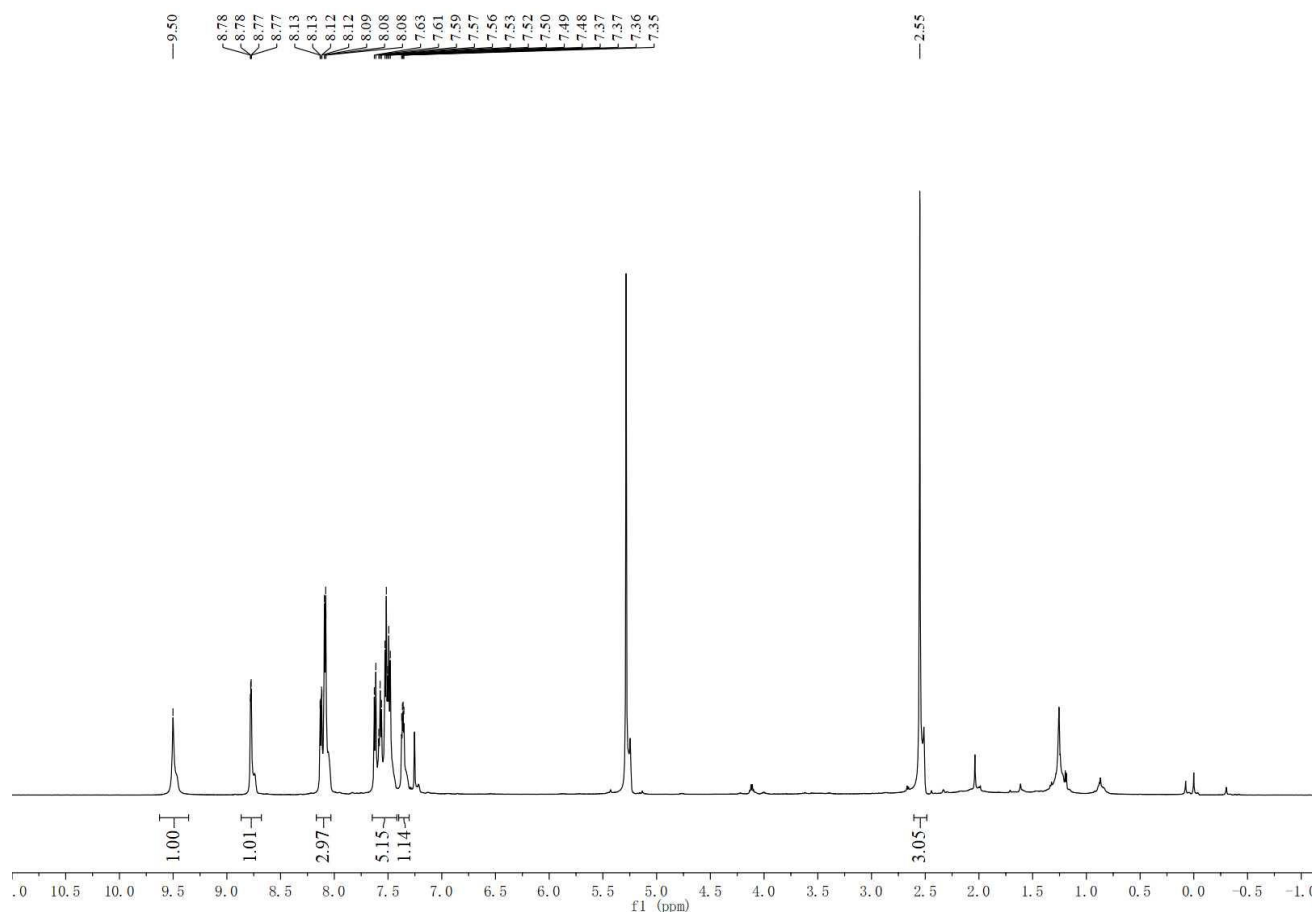

$^1H$  NMR spectrum of recovered amide **4a**

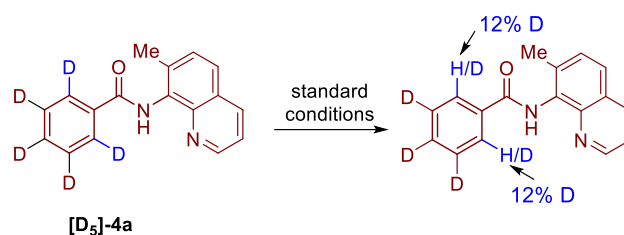

An oven dried Schlenk tube charged with magnetic stirrer added Deuterated benzamide **[D<sub>5</sub>]-4a** (0.1 mmol, 27 mg, 1.0 eq), Co(OAc)<sub>2</sub>·4H<sub>2</sub>O (0.01 mmol, 2.5 mg, 10 mol%), **L8** (0.02 mmol, 6.6 mg, 20 mol%), Mn(OAc)<sub>2</sub>·4H<sub>2</sub>O (0.05 mmol, 13 mg, 0.5 equiv) with subsequent addition of 2-BuOH (1 mL) as solvent. Then, the reaction system was placed in preheated metal bath stirred at 40 °C for 36 h. After the reaction was completed, the reaction mixture was diluted with DCM and filtered through a pad of Celite. The reaction solution was detected by TLC, and then concentrated in vacuum. The product was purified by flash column chromatography using petroleum ether/ethyl acetate (2:1) as eluent. <sup>1</sup>H NMR analysis showed that the H contents in the recovered amide were 12%.

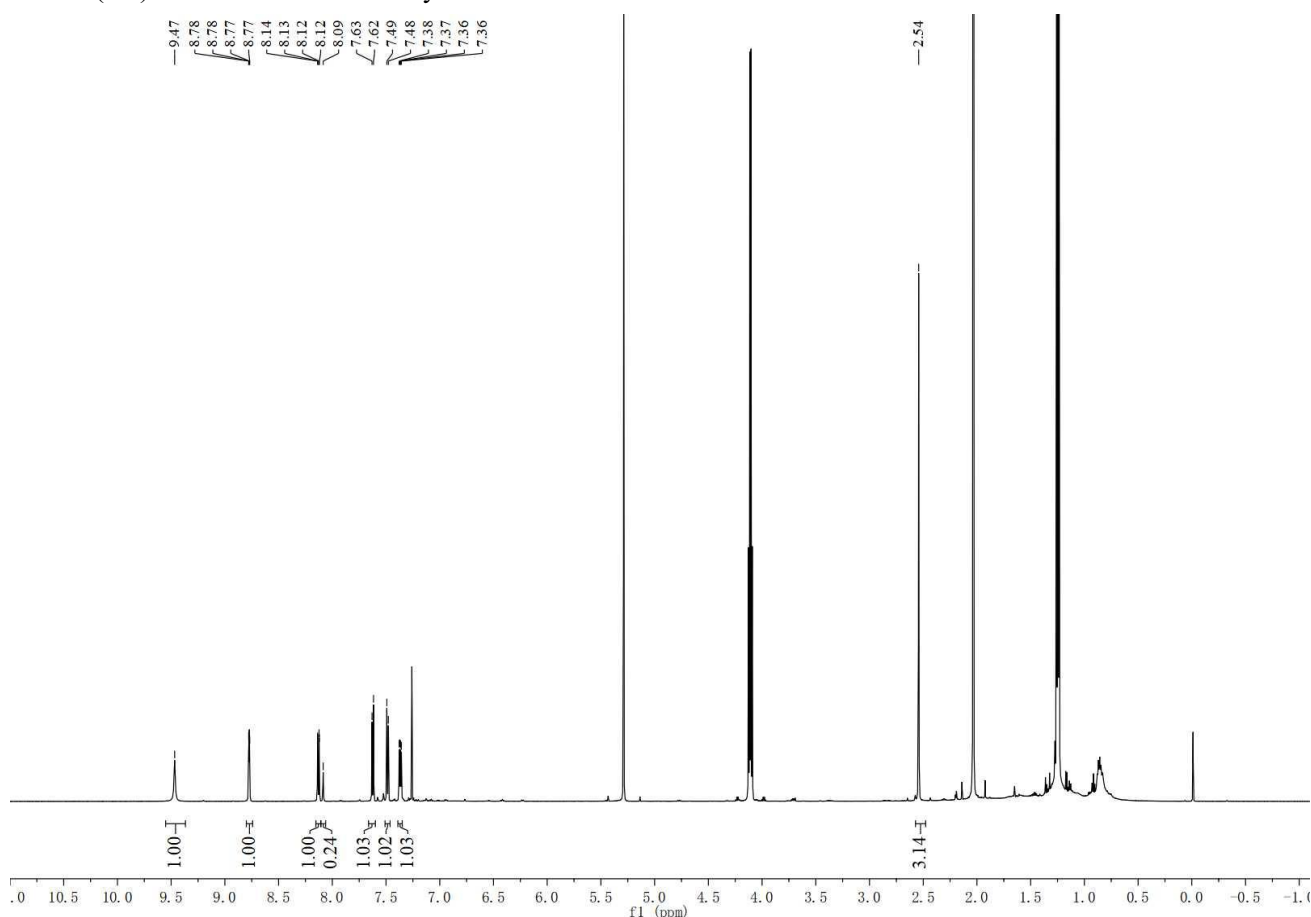

## 5.2 Parallel KIE experiments

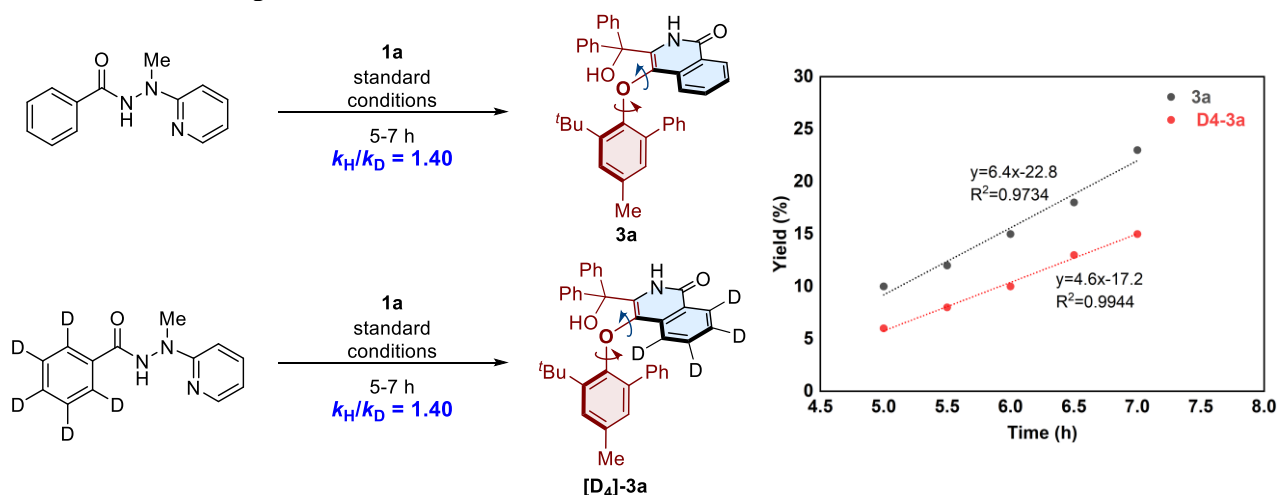

An oven dried Schlenk tube charged with magnetic stirrer added Deuterated benzamide **[D<sub>5</sub>]-2a** or benzamide **2a** (0.1 mmol, 23 mg, 1.0 eq),  $\text{Co}(\text{OAc})_2 \cdot 4\text{H}_2\text{O}$  (0.01 mmol, 2.5 mg, 10 mol%), **L8** (0.02 mmol, 6.6 mg, 20 mol%),  $\text{Mn}(\text{OAc})_2 \cdot 4\text{H}_2\text{O}$  (0.05 mmol, 13 mg, 0.5 equiv) with subsequent addition of 2-BuOH (1 mL) as solvent. To this reaction mixture, **1a** (0.12 mmol, 54 mg, 1.2 equiv) was added. Then, the reaction system was stirred at 60 °C for 5.0 h, 5.5 h, 6.0 h, 6.5 h, 7.0 h. After the reaction was completed, and immediately quenched with Ethyl acetate, and filtered through a pad of Celite. The reaction solution was removed under reduced pressure and  $^1\text{H}$  NMR was taken using anisole (0.05 mmol, 5.4mg) as the internal standard. The KIE was determined as  $k_H/k_D = 6.40/4.60 = 1.40$ .

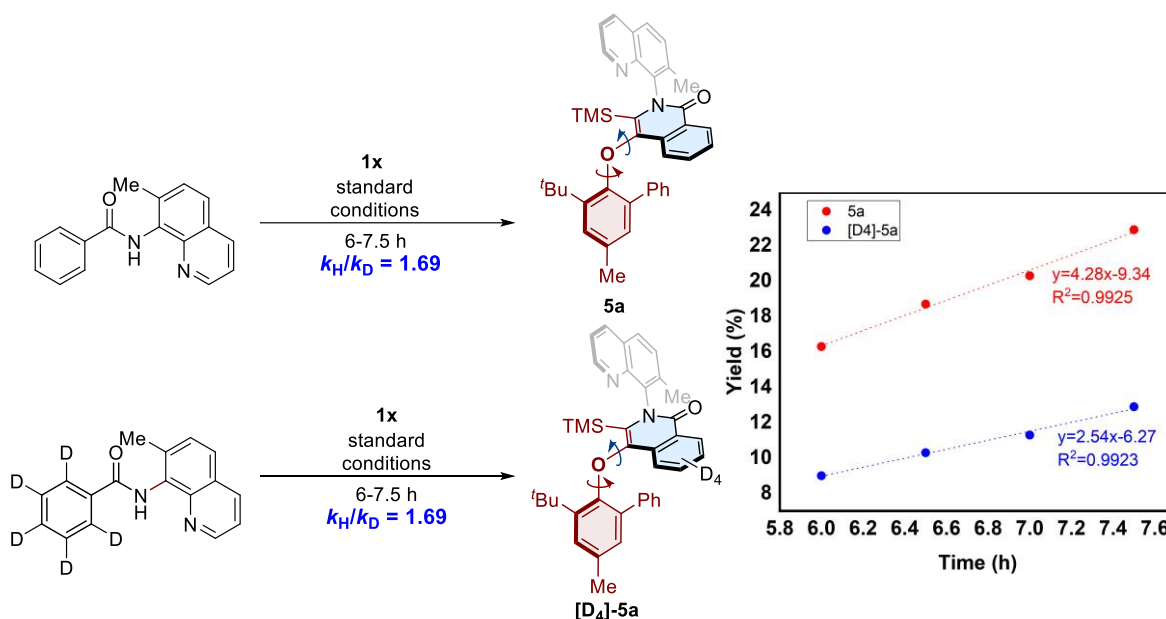

An oven dried schlenk tube charged with magnetic stirrer added Deuterated benzamide **[D<sub>5</sub>]-4a** or benzamide **4a** (0.1 mmol, 26.2 mg, 1.0 equiv), **1x** (0.12 mmol, 39.8 mg, 1.2 equiv),  $\text{Co}(\text{OAc})_2 \cdot 4\text{H}_2\text{O}$  (0.01 mmol, 2.5 mg, 10 mol%), **L8** (0.02 mmol, 6.5 mg, 20 mol%),  $\text{Mn}(\text{OAc})_2 \cdot 4\text{H}_2\text{O}$  (0.05 mmol, 12.3mg, 0.5 equiv),  $\text{NaOPiv} \cdot \text{H}_2\text{O}$  (0.1 mmol, 14.4 mg, 1 equiv), 2-BuOH (1 mL) as solvent. Then, the reaction system was placed in preheated metal bath stirred at 40 °C under Air for 6 h, 6.5 h, 7 h, 7.5 h. After the reaction was completed, and immediately quenched with Ethyl acetate. and filtered through a pad of Celite. The reaction solution was removed under reduced pressure and <sup>1</sup>H NMR was taken using anisole (0.05 mmol, 5.4mg) as the internal standard. The KIE was determined as  $k_H/k_D = 4.28/2.54 = 1.69$ .

## 6.0 Synthetic applications

### 6.1. Gram-scale synthesis of 3a

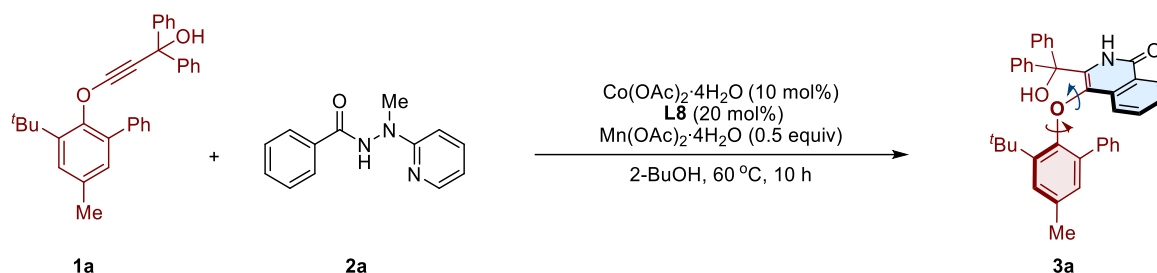

An oven-dried Schleck tube charged with magnetic stirrer was added **1a** (3.0 mmol, 1.4 g, 1.2 equiv), benzamide **2a** (2.5 mmol, 568 mg, 1.0 eq),  $\text{Co}(\text{OAc})_2 \cdot 4\text{H}_2\text{O}$  (0.25 mmol, 63 mg, 10 mol%), **L8** (0.5 mmol, 161.6 mg, 20 mol%),  $\text{Mn}(\text{OAc})_2 \cdot 4\text{H}_2\text{O}$  (1.25 mmol, 307.5 mg, 0.5 equiv), and anhydrous solvent 2-BuOH (20 mL) under air. Then, the reaction system was placed in preheated metal bath stirred at 60 °C for 36 h. After the reaction was completed, the mixture was cooled to room temperature and diluted with  $\text{CH}_2\text{Cl}_2$  and filtered over a Celite. The reaction solution was concentrated in vacuum and purified on silica gel chromatography to afford the corresponding products **3a** (1.2 g, 83%, 96% ee).

### 6.1. Gram-scale synthesis of 5a

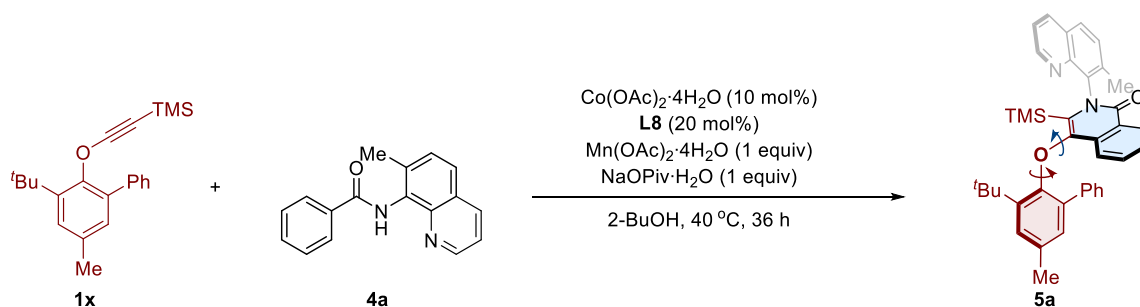

An oven dried Schleck tube charged with magnetic stirrer added benzamide **4a** (2.5 mmol, 655 mg, 1.0 eq), **1x** (2.8 mmol, 0.94 g, 1.2 equiv),  $\text{Co}(\text{OAc})_2 \cdot 4\text{H}_2\text{O}$  (0.25 mmol, 63 mg, 10 mol%), **L8** (0.5 mmol, 161.6 mg, 20 mol%),  $\text{Mn}(\text{OAc})_2 \cdot 4\text{H}_2\text{O}$  (1.25 mmol, 307.5 mg, 0.5 equiv),  $\text{NaOPiv} \cdot \text{H}_2\text{O}$  (2.5 mmol, 360.4 mg, 1.0 equiv), and anhydrous solvent 2-BuOH (20 mL) under air. Then, the reaction system was placed in preheated metal bath stirred at 40 °C for 36 h. After the reaction was completed. The mixture was cooled to room temperature and diluted with  $\text{CH}_2\text{Cl}_2$  and filtered over a Celite. The reaction solution was concentrated in vacuum and purified on silica gel chromatography to afford the corresponding products **5a** (1.1 g, 76%, 19:1 dr ,99% ee).

### 6.3. Transformations and Synthetic Applications of 3a and 5a

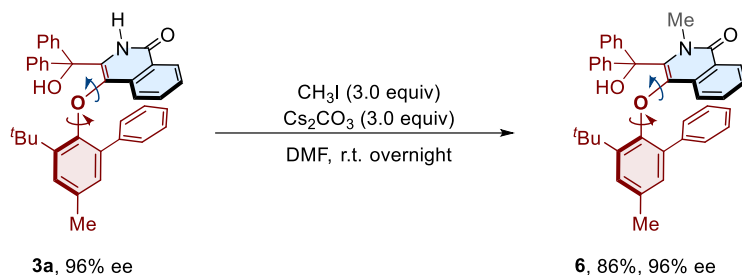

An oven-dried Schleck tube was charged with **3a** (0.1 mmol, 57.0 mg, 1.0 eq), MeI (0.3 mmol, 43.0 mg, 3.0 eq) and Cs<sub>2</sub>CO<sub>3</sub> (0.3 mmol, 98.0 mg, 3.0 eq) in DMF (2 mL). Then, the reaction mixture was stirred at room temperature for overnight. After the completion of the reaction as indicated by TLC, water was added to quench the reaction. The product was extracted by ethyl acetate, washed with brine, dried over anhydrous Na<sub>2</sub>SO<sub>4</sub>, evaporated the solvent under vacuum, and purified by silica gel column chromatography (petroleum ether/dichloromethane = 2/1) to afford the product **6** as a white solid (49.9 mg, 86% yield, 96% ee).

#### (S<sub>a</sub>)-4-((3-(tert-butyl)-5-methyl-[1,1'-biphenyl]-2-yl)oxy)-3-(hydroxydiphenylmethyl)-2-methylisoquinolin-1(2H)-one (**6**)

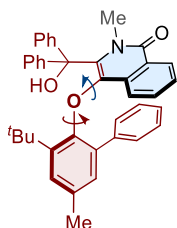

(PE:DCM = 2:1) White solid. (49.9 mg, 86% yield, 96% ee). mp: 176–177 °C.

**<sup>1</sup>H NMR** (600 MHz, CDCl<sub>3</sub>) δ 7.93 (d, *J* = 8.2 Hz, 1H), 7.35 (t, *J* = 7.6 Hz, 1H), 7.28 (d, *J* = 9.5 Hz, 7H), 7.25 – 7.18 (m, 6H), 6.79 (t, *J* = 7.4 Hz, 1H), 6.68 (t, *J* = 7.6 Hz, 2H), 6.64 (s, 1H), 6.45 (s, 2H), 5.63 (s, 1H), 3.50 (s, 3H), 2.32 (s, 3H), 1.16 (s, 9H).

**<sup>13</sup>C NMR** (151 MHz, CDCl<sub>3</sub>) δ 153.5, 150.7, 147.4, 146.7, 140.7, 140.1, 139.8, 138.2, 132.6, 132.4, 132.1, 131.6, 129.5, 129.1, 129.0, 128.2, 128.1, 127.8, 127.3, 127.0, 126.6, 126.3, 126.0, 125.9, 124.4, 122.0, 119.3, 83.2, 53.4, 35.2, 30.3, 21.0.

**HRMS** (ESI): *m/z* [M+H]<sup>+</sup> calcd for [C<sub>40</sub>H<sub>38</sub>NO<sub>3</sub>]<sup>+</sup> required 580.2852, found 580.2853.

[α]<sub>D</sub><sup>25</sup> = +44.67 (c = 0.05, CH<sub>2</sub>Cl<sub>2</sub>).

**HPLC Condition:** The enantiomeric excess was determined by HPLC analysis on a Daicel Chiralcel IC, Hexanes/IPA = 95/5, 0.6 mL/min, λ = 254 nm, t (minor) = 8.474 min, t (major) = 8.901 min.

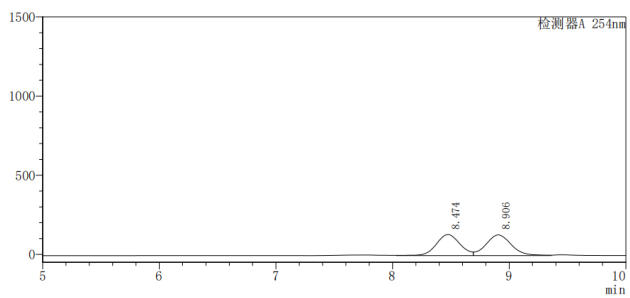

| Peak | RetTime | Area    | Height | Area%  |
|------|---------|---------|--------|--------|
| 1    | 8.474   | 1879966 | 132697 | 48.972 |
| 2    | 8.906   | 1958918 | 130531 | 51.028 |

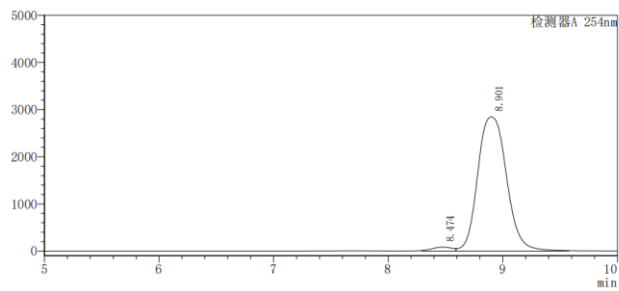

| Peak | RetTime | Area     | Height  | Area%  |
|------|---------|----------|---------|--------|
| 1    | 8.474   | 1029783  | 82249   | 2.028  |
| 2    | 8.901   | 49744665 | 2846300 | 97.972 |

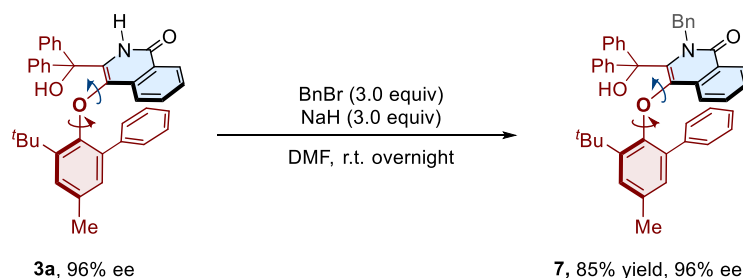

An oven-dried Schleck tube was charged with **3a** (0.1 mmol, 57.0 mg, 1.0 eq), BnBr (0.3 mmol, 53.1 mg, 3.0 eq) and NaH (0.3 mmol, 12.0 mg, 3.0 eq) in DMF (2 mL). Then, the reaction mixture was stirred at room temperature for overnight. After the completion of the reaction as indicated by TLC, water was added to quench the reaction. The product was extracted by ethyl acetate, washed with brine, dried over anhydrous Na<sub>2</sub>SO<sub>4</sub>, evaporated the solvent under vacuum, and purified by silica gel column chromatography (petroleum ether/dichloromethane = 2/1) to afford the product **7** as a white solid (55.8 mg, 85% yield, 96% ee).

**(S<sub>a</sub>)-2-benzyl-4-((3-(tert-butyl)-5-methyl-[1,1'-biphenyl]-2-yl)oxy)-3-(hydroxydiphenylmethyl)isoquinolin-1(2H)-one (7)**

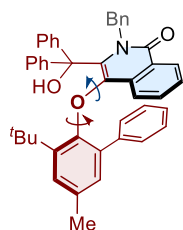

(PE:DCM = 2:1) White solid. (55.8 mg, 85% yield, 96% ee). mp: 202–203 °C.

<sup>1</sup>H NMR (600 MHz, CDCl<sub>3</sub>) δ 8.02 (d, *J* = 8.2 Hz, 1H), 7.35 (t, *J* = 7.5 Hz, 1H), 7.28 (t, *J* = 6.3 Hz, 8H), 7.25 – 7.15 (m, 8H), 7.08 (d, *J* = 7.9 Hz, 2H), 6.67 – 6.59 (m, 4H), 6.49 (s, 2H), 5.53 (s, 1H), 5.03 (d, *J* = 12.6 Hz, 1H), 4.91 (d, *J* = 12.6 Hz, 1H), 2.32 (s, 3H), 1.15 (s, 9H).

<sup>13</sup>C NMR (151 MHz, CDCl<sub>3</sub>) δ 152.7, 150.6, 147.5, 146.7, 140.8, 140.2, 139.9, 138.1, 137.9, 132.7, 132.5, 132.0, 131.6, 129.5, 129.2, 129.1, 128.3, 128.1 (2C), 128.0, 127.7, 127.6, 127.2, 127.1, 126.7, 126.4, 126.1, 125.9, 124.5, 122.0, 119.4, 83.3, 67.2, 35.2, 30.3, 21.0.

HRMS (ESI): *m/z* [M+H]<sup>+</sup> calcd for [C<sub>46</sub>H<sub>42</sub>NO<sub>3</sub>]<sup>+</sup> required 656.3165, found 656.3171.

[α]<sub>D</sub><sup>25</sup> = +53.33 (c = 0.05, CH<sub>2</sub>Cl<sub>2</sub>).

**HPLC Condition:** The enantiomeric excess was determined by HPLC analysis on a Daicel Chiralcel IC, Hexanes/IPA = 95/5, 0.6 mL/min, λ = 254 nm, t (minor) = 4.186 min, t (major) = 4.630 min.

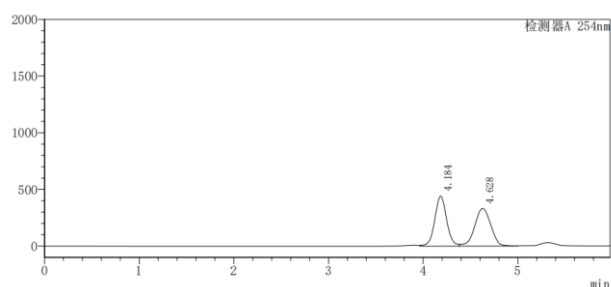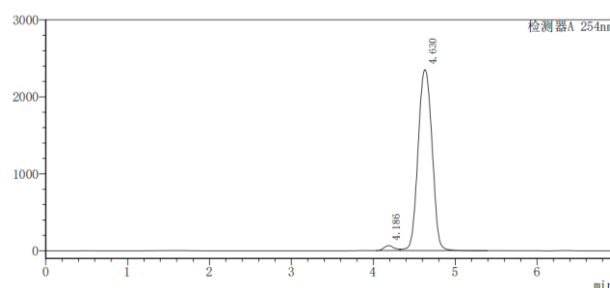

| Peak | RetTime | Area    | Height | Area%  |
|------|---------|---------|--------|--------|
| 1    | 4.184   | 3868446 | 442220 | 49.657 |
| 2    | 4.628   | 3921895 | 332416 | 50.343 |

| Peak | RetTime | Area     | Height  | Area%  |
|------|---------|----------|---------|--------|
| 1    | 4.186   | 573349   | 65551   | 2.013  |
| 2    | 4.630   | 27909324 | 2351187 | 97.987 |

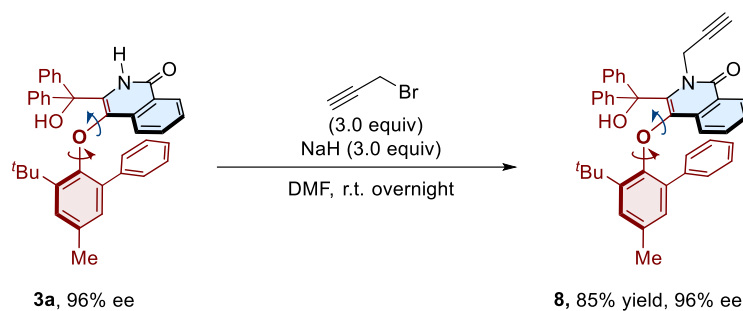

An oven-dried Schleck tube was charged with **3a** (0.1 mmol, 57.0 mg, 1.0 eq), 3-bromoprop-1-yne (0.3 mmol, 36.0 mg, 3.0 eq) and NaH (0.3 mmol, 12.0 mg, 3.0 eq) in DMF (2 mL). Then, the reaction mixture was stirred at room temperature for overnight. After the completion of the reaction as indicated by TLC, water was added to quench the reaction. The product was extracted by ethyl acetate, washed with brine, dried over anhydrous Na<sub>2</sub>SO<sub>4</sub>, evaporated the solvent under vacuum, and purified by silica gel column chromatography (petroleum ether/dichloromethane = 4/1) to afford the product **8** as a yellow oil (53.2 mg, 85% yield, 96% ee).

**(S<sub>a</sub>)-4-((3-(tert-butyl)-5-methyl-[1,1'-biphenyl]-2-yl)oxy)-3-(hydroxydiphenylmethyl)-2-(prop-2-yn-1-yl)isoquinolin-1(2H)-one (**8**)**

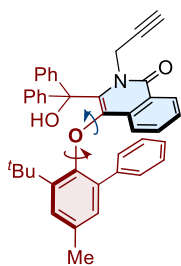

(PE:DCM = 4:1) yellow oil. (53.2 mg, 85% yield, 96% ee).

**<sup>1</sup>H NMR** (600 MHz, CDCl<sub>3</sub>) δ 7.98 (d, *J* = 8.2 Hz, 1H), 7.37 (t, *J* = 7.6 Hz, 1H), 7.30 (p, *J* = 7.6 Hz, 5H), 7.26 – 7.23 (m, 2H), 7.21 (d, *J* = 8.8 Hz, 6H), 6.81 (t, *J* = 7.4 Hz, 1H), 6.72 (t, *J* = 7.6 Hz, 2H), 6.67 (s, 1H), 6.59 (s, 2H), 5.41 (s, 1H), 4.48 (d, *J* = 14.3 Hz, 1H), 4.33 (d, *J* = 19.3 Hz, 1H), 2.33 (s, 4H), 1.15 (s, 9H).

**<sup>13</sup>C NMR** (151 MHz, CDCl<sub>3</sub>) δ 151.6, 150.6, 147.6, 146.5, 141.3, 140.2, 139.9, 138.0, 132.7, 132.6, 132.0, 131.6, 129.6, 129.3, 129.0, 128.1, 128.0, 127.8, 127.3, 127.0, 126.6, 126.5, 126.3, 126.2, 124.4, 122.0, 119.1, 83.4, 79.6, 73.8, 53.4, 35.2, 30.3, 21.0.

**HRMS** (ESI): *m/z* [M+K]<sup>+</sup> calcd for [C<sub>42</sub>H<sub>37</sub>KNO<sub>3</sub>]<sup>+</sup> required 642.2411, found 642.2405.

[α]<sub>D</sub><sup>25</sup> = -38.33 (c = 0.05, CH<sub>2</sub>Cl<sub>2</sub>).

**HPLC Condition:** The enantiomeric excess was determined by HPLC analysis on a Daicel Chiralcel IC, Hexanes/IPA = 95/5, 0.8 mL/min, λ = 254 nm, *t* (minor) = 4.186 min, *t* (major) = 4.630 min.

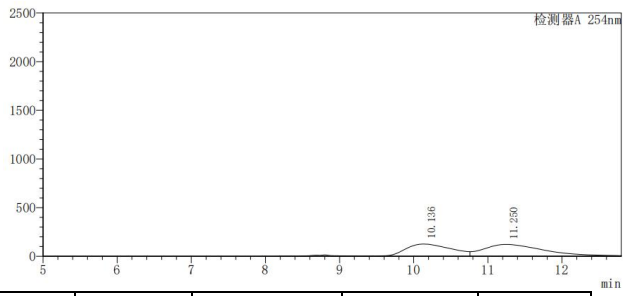

| Peak | RetTime | Area    | Height | Area%  |
|------|---------|---------|--------|--------|
| 1    | 10.136  | 5373182 | 120467 | 49.657 |
| 2    | 11.250  | 7055726 | 245705 | 50.343 |

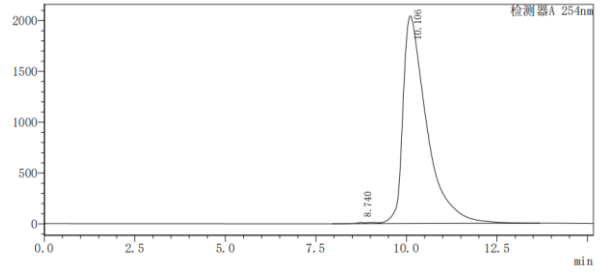

| Peak | RetTime | Area     | Height  | Area%  |
|------|---------|----------|---------|--------|
| 1    | 8.740   | 421116   | 13537   | 2.213  |
| 2    | 10.106  | 93670719 | 2042385 | 97.787 |

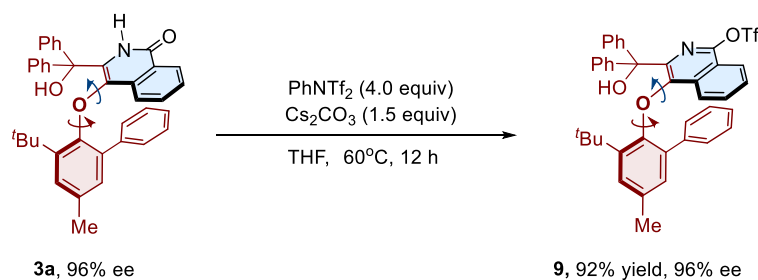

An oven-dried Schleck tube was charged with **3a** (0.1 mmol, 57.0 mg, 1.0 eq),  $\text{Cs}_2\text{CO}_3$  (0.15 mmol, 48.9 mg)  $\text{PhNTf}_2$  (0.4 mmol, 142.8 mg) and THF (2 mL). The resulted mixture was stirred at 60 °C for 12 h. After the reaction was completed, the solvent was removed under reduced pressure. Then the residue was purified by silica gel column chromatography (petroleum ether/ dichloromethane = 2/1) to afford the product **9** as a white solid (64.2 mg, 92% yield, 96% ee).

**(*S*<sub>a</sub>)-4-((3-(tert-butyl)-5-methyl-[1,1'-biphenyl]-2-yl)oxy)-3-(hydroxydiphenylmethyl)isoquinolin-1-yl trifluoromethanesulfonate (**9**)**

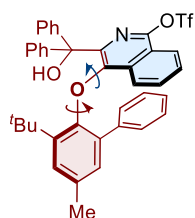

(PE:DCM = 2:1) White solid. (64.2 mg, 92% yield, 96% ee). mp: 150–151 °C.

**<sup>1</sup>H NMR** (600 MHz,  $\text{CDCl}_3$ )  $\delta$  7.85 (d,  $J$  = 8.4 Hz, 1H), 7.55 (t,  $J$  = 7.6 Hz, 1H), 7.40 (t,  $J$  = 7.9 Hz, 1H), 7.34 – 7.28 (m, 4H), 7.28 – 7.20 (m, 6H), 7.15 – 7.08 (m, 2H), 6.91 (t,  $J$  = 7.4 Hz, 1H), 6.89 – 6.77 (m, 2H), 6.67 (d,  $J$  = 75.8 Hz, 3H), 5.13 (s, 1H), 2.36 (s, 3H), 1.12 (s, 9H).

**<sup>13</sup>C NMR** (151 MHz,  $\text{CDCl}_3$ )  $\delta$  150.4, 146.9, 146.4, 145.3, 144.3, 142.0, 140.2, 137.3, 133.9, 133.0, 132.1, 131.9, 130.1, 129.5, 128.9, 128.4 (2C), 128.1, 127.8, 127.7, 127.3, 127.1 (2C), 127.0, 123.4, 122.7, 120.6, 119.5, 117.3, 83.5, 35.1, 30.3, 21.1.

**<sup>19</sup>F NMR** (565 MHz,  $\text{CDCl}_3$ )  $\delta$  -72.97.

**HRMS** (ESI):  $m/z$   $[\text{M}+\text{H}]^+$  calcd for  $[\text{C}_{40}\text{H}_{35}\text{F}_3\text{NO}_5\text{S}]^+$  required 698.2188, found 698.2178.

$[\alpha]_{\text{D}}^{25} = +14.00$  ( $c = 0.5$ ,  $\text{CH}_2\text{Cl}_2$ ).

**HPLC Condition:** The enantiomeric excess was determined by HPLC analysis on a Daicel Chiralcel IC, Hexanes/IPA = 95/5, 0.6 mL/min,  $\lambda = 254$  nm,  $t$  (minor) = 4.351 min,  $t$  (major) = 4.875 min.

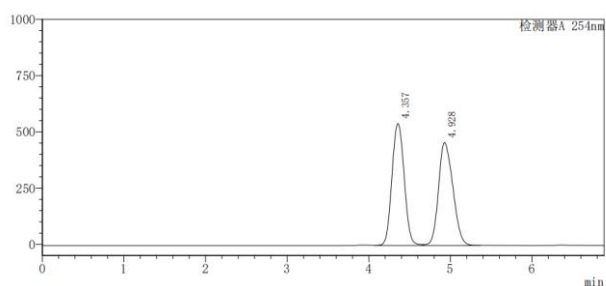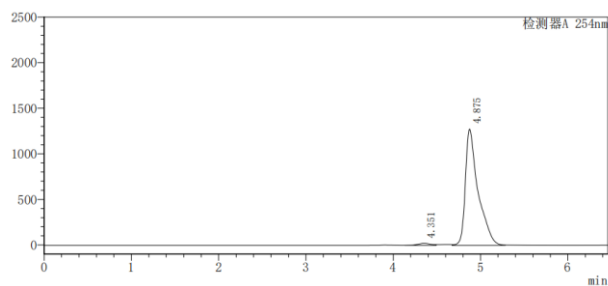

| Peak | RetTime | Area    | Height | Area%  |
|------|---------|---------|--------|--------|
| 1    | 4.357   | 5681156 | 542941 | 50.217 |
| 2    | 4.928   | 5632006 | 457536 | 49.783 |

| Peak | RetTime | Area     | Height  | Area%  |
|------|---------|----------|---------|--------|
| 1    | 4.351   | 252342   | 23169   | 1.915  |
| 2    | 4.875   | 12926459 | 1277841 | 98.085 |

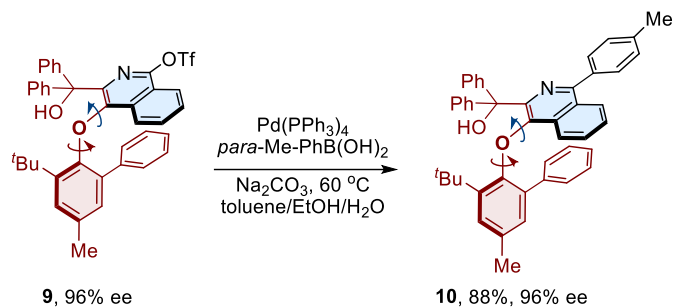

An oven-dried Schleck tube was charged with **9** (0.1 mmol, 70.0 mg, 1.0 eq), *p*-tolylboronic acid (0.2 mmol, 27.2 mg), Pd(PPh<sub>3</sub>)<sub>4</sub> (4 mol%, 4.6 mg), Na<sub>2</sub>CO<sub>3</sub> (0.2 mmol, 21.2 mg) and toluene:EtOH:H<sub>2</sub>O (2 mL, 10:1:1). Then, the reaction mixture was stirred at 60 °C for 12 h. After the completion of the reaction as indicated by TLC, water was added to quench the reaction. The solvent was evaporated under vacuum and the residue was purified by flash column chromatography (petroleum ether/ dichloromethane = 1/1) to afford the product **10** as a white solid (56.3 mg, 88% yield, 96% ee).

**(S<sub>a</sub>)-4-((3-(tert-butyl)-5-methyl-[1,1'-biphenyl]-2-yl)oxy)-1-(p-tolyl)isoquinolin-3-yl)diphenylmethanol (10)**

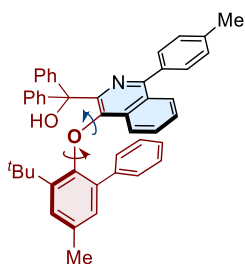

(PE:DCM = 1:1) White solid. (56.3 mg, 88% yield, 96% ee). mp: 172–173 °C.

<sup>1</sup>H NMR (600 MHz, CDCl<sub>3</sub>) δ 7.77 (t, *J* = 8.3 Hz, 4H), 7.38 – 7.30 (m, 3H), 7.30 – 7.13 (m, 14H), 6.53 (t, *J* = 7.5 Hz, 1H), 6.39 (s, 1H), 6.29 (t, *J* = 7.6 Hz, 2H), 5.26 (s, 1H), 2.39 (s, 3H), 2.20 (s, 3H), 1.15 (s, 9H).

<sup>13</sup>C NMR (151 MHz, CDCl<sub>3</sub>) δ 151.2, 150.8, 145.9, 144.9, 144.5, 139.6, 139.2, 138.7, 138.5, 136.1, 132.2, 132.1, 131.8, 130.1, 130.0, 129.7, 129.1, 128.9, 128.4, 128.3 (2C), 128.2, 128.0, 127.6, 127.4, 127.3, 126.3, 126.2, 125.4, 122.4, 80.4, 35.4, 30.3, 21.5, 21.0.

HRMS (ESI): *m/z* [M+Na]<sup>+</sup> calcd for [C<sub>46</sub>H<sub>41</sub>NNaO<sub>2</sub>]<sup>+</sup> required 662.3035, found 662.3033.

[α]<sub>D</sub><sup>25</sup> = +23.00 (c = 0.05, CH<sub>2</sub>Cl<sub>2</sub>).

**HPLC Condition:** The enantiomeric excess was determined by HPLC analysis on a Daicel Chiralcel AD-H, Hexanes/IPA = 95/5, 0.8 mL/min, λ = 254 nm, *t* (minor) = 4.848 min, *t* (major) = 7.533 min.

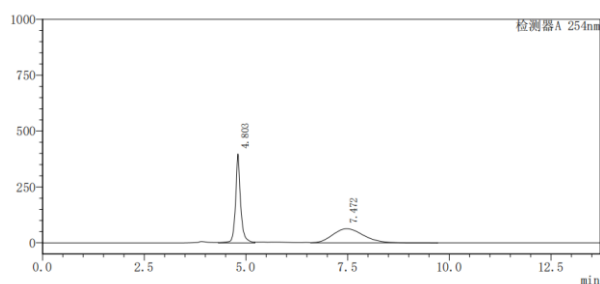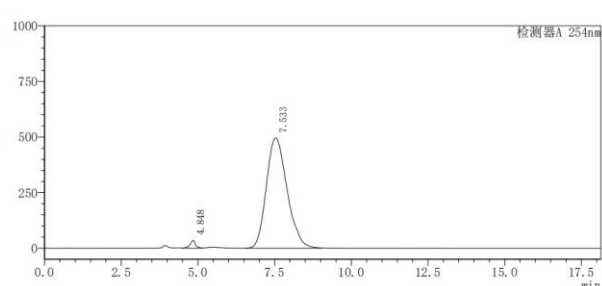

| Peak | RetTime | Area    | Height | Area%  |
|------|---------|---------|--------|--------|
| 1    | 4.803   | 3456521 | 398745 | 50.743 |
| 2    | 7.472   | 3355328 | 63371  | 49.257 |

| Peak | RetTime | Area     | Height | Area%  |
|------|---------|----------|--------|--------|
| 1    | 4.848   | 443101   | 35634  | 1.867  |
| 2    | 7.533   | 23292470 | 496241 | 98.133 |

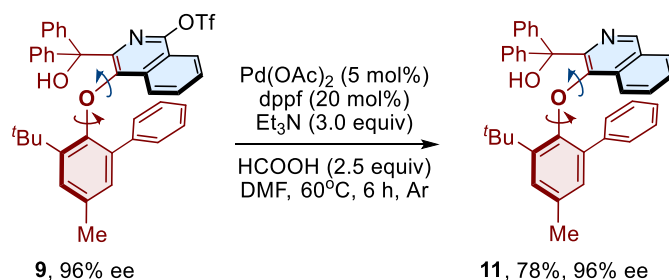

An oven-dried Schleck tube was charged with **9** (0.1 mmol, 70.0 mg, 1.0 eq)  $\text{Pd(OAc)}_2$  (5 mol%, 1.1 mg),  $\text{dppf}$  (10 mol%, 5.5 mg),  $\text{HCOOH}$  (0.25 mmol, 2.5 equiv),  $\text{Et}_3\text{N}$  (0.3 mmol, 3 equiv) and  $\text{DMF}$  (2 mL). The resulted mixture was stirred at 60 °C for 3 h. After the completion of the reaction as indicated by TLC, water was added to quench the reaction. The product was extracted by ethyl acetate, washed with brine, dried over anhydrous  $\text{Na}_2\text{SO}_4$ , evaporated the solvent under vacuum, and purified by silica gel column chromatography (petroleum ether/dichloromethane = 1/1) to afford the product **11** as a white solid (42.9 mg, 78% yield, 96% ee).

**(*S*<sub>a</sub>)-4-((3-(tert-butyl)-5-methyl-[1,1'-biphenyl]-2-yl)oxy)isoquinolin-3-yl)diphenylmethanol (**11**)**

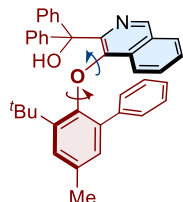

(PE:DCM = 1:1) White solid. (42.9 mg, 78% yield, 96% ee). mp: 145–146 °C.

<sup>1</sup>H NMR (600 MHz,  $\text{CDCl}_3$ )  $\delta$  8.52 (s, 1H), 7.71 (d,  $J$  = 8.2 Hz, 1H), 7.44 – 7.36 (m, 3H), 7.28 (dd,  $J$  = 21.3, 9.2 Hz, 8H), 7.20 (t,  $J$  = 9.6 Hz, 3H), 6.78 (t,  $J$  = 7.3 Hz, 1H), 6.72 – 6.54 (m, 3H), 6.31 (s, 1H), 6.16 (s, 2H), 2.33 (s, 3H), 1.13 (s, 9H).

<sup>13</sup>C NMR (151 MHz,  $\text{CDCl}_3$ )  $\delta$  150.6, 146.8, 146.4, 145.8, 144.2, 143.6, 140.1, 138.0, 133.2, 133.1, 131.9, 129.6, 129.1, 128.9, 128.8, 128.7 (2C), 128.2, 127.8 (2C), 127.7, 127.4, 127.1, 126.7, 126.5, 126.4, 122.2, 82.8, 35.2, 30.3, 21.1.

HRMS (ESI):  $m/z$   $[\text{M}+\text{H}]^+$  calcd for  $[\text{C}_{39}\text{H}_{36}\text{NO}_2]^+$  required 550.2746, found 550.2747.

$[\alpha]_{\text{D}}^{25} = -37.33$  ( $c = 0.05$ ,  $\text{CH}_2\text{Cl}_2$ ).

**HPLC Condition:** The enantiomeric excess was determined by HPLC analysis on a Daicel Chiralcel IC, Hexanes/IPA = 80/20, 0.8 mL/min,  $\lambda = 254$  nm,  $t$  (minor) = 4.253 min,  $t$  (major) = 5.136 min.

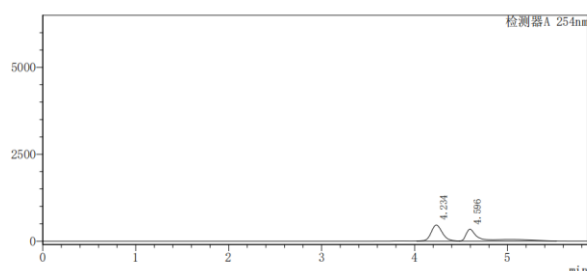

| Peak | RetTime | Area    | Height | Area%  |
|------|---------|---------|--------|--------|
| 1    | 4.234   | 1541482 | 51782  | 51.891 |

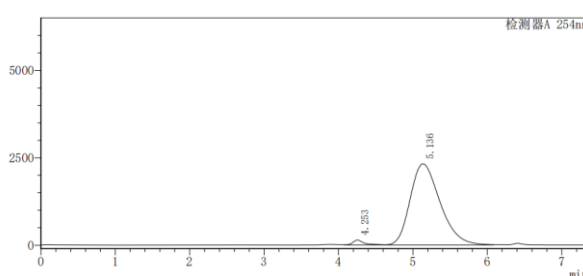

| Peak | RetTime | Area    | Height | Area% |
|------|---------|---------|--------|-------|
| 1    | 4.253   | 1604148 | 142890 | 2.102 |

|   |       |         |       |        |
|---|-------|---------|-------|--------|
| 2 | 4.596 | 1429152 | 51939 | 48.109 |
|---|-------|---------|-------|--------|

|   |       |          |         |        |
|---|-------|----------|---------|--------|
| 2 | 5.136 | 65177543 | 2324317 | 97.898 |
|---|-------|----------|---------|--------|

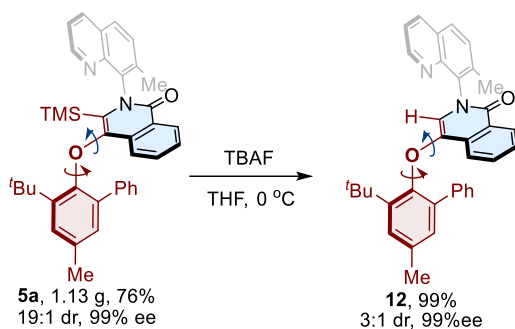

An oven-dried Schleck tube was charged with **5a** (0.1 mmol, 59.6 mg, 1.0 eq), TBAF (0.2 mmol, 52.3 mg, 2 eq), and THF (3 mL) under Ar. The resulted mixture was stirred at 0 °C for 15 min. After the completion of the reaction as indicated by TLC, water was added to quench the reaction. The product was extracted by ethyl acetate, washed with brine, dried over anhydrous Na<sub>2</sub>SO<sub>4</sub>, evaporated the solvent under vacuum, and purified by silica gel column chromatography (PE/ EA = 2/1) to afford the product **12** as a white solid (52.4 mg, 99% yield, 3:1 dr, 99% ee).

**(*S*<sub>aC-O</sub>,*S*<sub>aC-N</sub>)-4-((3-(tert-butyl)-5-methyl-[1,1'-biphenyl]-2-yl)oxy)-2-(7-methylquinolin-8-yl)isoquinolin-1(2H)-one (**12**)**

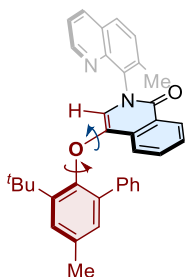

(PE:EA = 2:1) White solid. (52.4 mg, 99% yield, 3:1 dr, 99% ee). mp: 143–144 °C.

**<sup>1</sup>H NMR** (600 MHz, CDCl<sub>3</sub>) δ 8.68 – 8.60 (m, 1H), 8.35 (d, *J* = 8.1 Hz, 1H), 8.17 (d, *J* = 8.3 Hz, 1H), 8.07 (d, *J* = 8.0 Hz, 1H), 7.80 – 7.74 (m, 2H), 7.55 – 7.50 (m, 1H), 7.46 (d, *J* = 8.5 Hz, 1H), 7.40 (d, *J* = 7.7 Hz, 2H), 7.16 – 7.12 (m, 2H), 7.07 (t, *J* = 7.3 Hz, 2H), 7.01 (d, *J* = 7.4 Hz, 1H), 6.98 (s, 1H), 5.92 (s, 1H), 2.30 (s, 3H), 2.16 (s, 3H), 1.46 (s, 9H).

**<sup>13</sup>C NMR** (151 MHz, CDCl<sub>3</sub>) δ 159.8, 150.8, 148.4, 143.6, 138.7, 138.0, 137.8, 135.6, 135.4, 134.4, 132.7, 132.0, 130.3, 129.5, 129.2, 128.8, 128.4, 128.2, 128.0, 127.8, 127.7, 127.6, 127.2, 127.0, 125.9, 121.3, 120.9, 117.7, 35.4, 31.2, 21.3, 18.4.

**HRMS** (ESI): *m/z* [M+H]<sup>+</sup> calcd for [C<sub>36</sub>H<sub>33</sub>N<sub>2</sub>O<sub>2</sub>]<sup>+</sup> required 525.6720, found 525.6712.

[α]<sub>D</sub><sup>25</sup> = -73.33 (c = 0.05, CH<sub>2</sub>Cl<sub>2</sub>).

**HPLC Condition:** The enantiomeric excess was determined by HPLC analysis on a Daicel Chiralcel IC, Hexanes/IPA = 90/10, 1.0 mL/min, λ = 254 nm, *t* (minor) = 162.894 min, *t* (major) = 93.134 min. The dr value was determined by **<sup>1</sup>H NMR**.

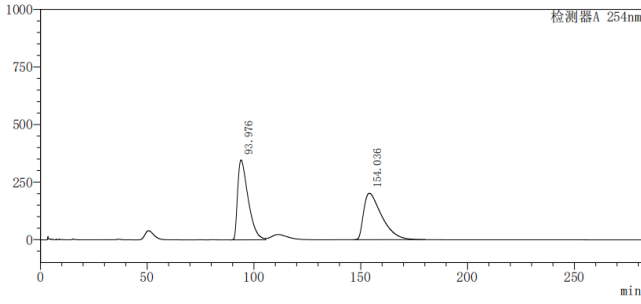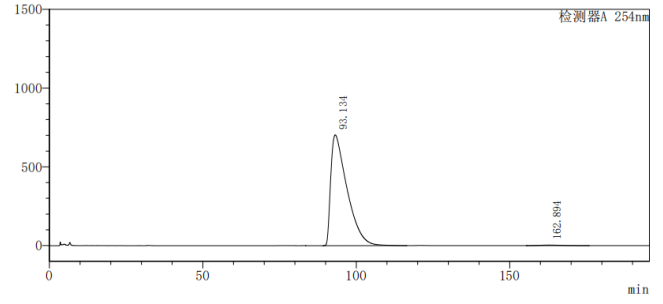

| Peak | RetTime | Area      | Height | Area%  |
|------|---------|-----------|--------|--------|
| 1    | 93.976  | 118748463 | 347586 | 50.062 |
| 2    | 154.036 | 118456383 | 202100 | 49.938 |

| Peak | RetTime | Area      | Height | Area%  |
|------|---------|-----------|--------|--------|
| 1    | 93.134  | 260078450 | 703743 | 99.334 |
| 2    | 162.894 | 1744313   | 3503   | 0.666  |

8.64  
8.64  
8.63  
8.35  
8.34  
8.17  
8.16  
8.08  
8.07  
7.78  
7.77  
7.76  
7.74  
7.52  
7.51  
7.47  
7.45  
7.41  
7.39  
7.26  
7.15  
7.14  
7.13  
7.09  
7.07  
7.06  
7.01  
6.98

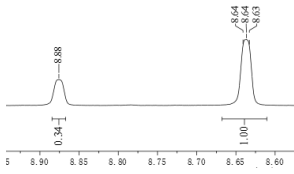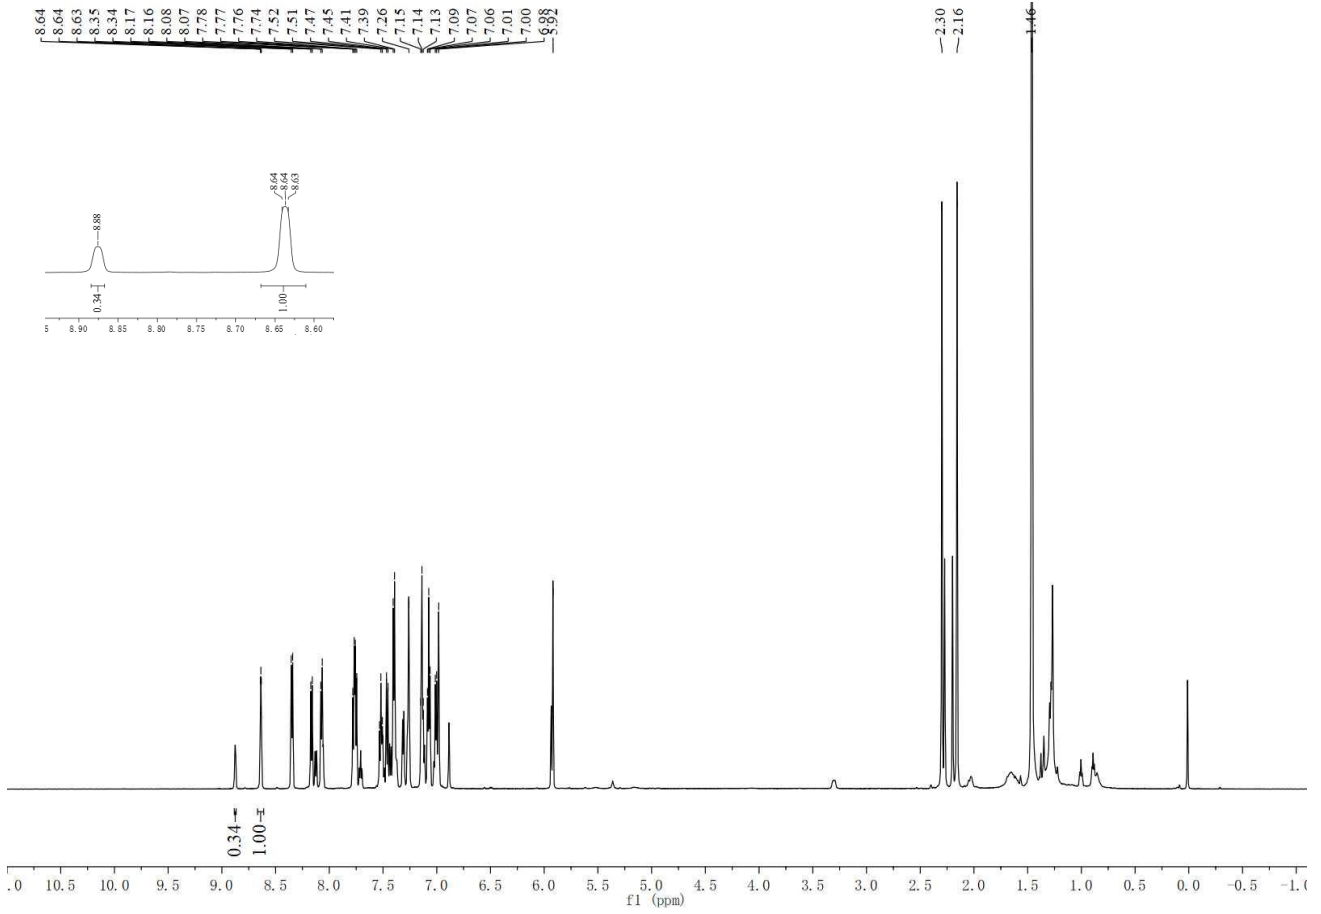

## 7. Study on product stabilities

The enantiomerization barrier, corresponding to the barrier to rotation for the following atropisomers, was obtained by kinetic of racemization of an enantiomer. The slope of the firstorder kinetic line gives the racemization constant ( $k_{\text{racemization}} = 2 \times k_{\text{enantiomerization}}$ ). According to the Eyring equation, the enantiomerization barrier ( $\Delta G^\ddagger_{\text{enantiomerization}}$ ) can be obtained from enantiomerization constant ( $k_{\text{enantiomerization}}$ ),  $R = 8.31451 \text{ J}\cdot\text{K}^{-1}\cdot\text{mol}^{-1}$ ,  $h = 6.62608 \times 10^{-34} \text{ J}\cdot\text{s}$  and  $k_B = 1.38066 \times 10^{-23} \text{ J}\cdot\text{K}^{-1}$ .<sup>7,8,9,10</sup>

$$\Delta G^\ddagger_{\text{enantiomerization}} = RT \cdot \ln \frac{Tk_B}{hk_{\text{enantiomerization}}}$$

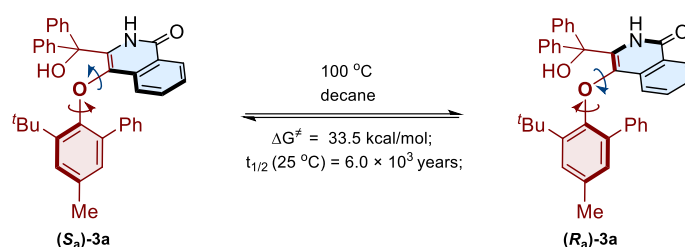

A solution of (*S<sub>a</sub>*)-**3a** (10.0 mg, 96% ee) in decane (1 mL) was heated at the specific temperatures (Table S16). The de value was determined by chiral HPLC analysis at different intervals. The recovery of compounds **3a** was 90%.

Table S16. Thermal racemization of product **3a** at 100 °C

| Time (h) | 0      | 1      | 2      | 4      | 6      | 8      | 10     | 12     |
|----------|--------|--------|--------|--------|--------|--------|--------|--------|
| ee (%)   | 96.508 | 96.498 | 96.314 | 96.086 | 95.890 | 95.612 | 95.236 | 94.960 |

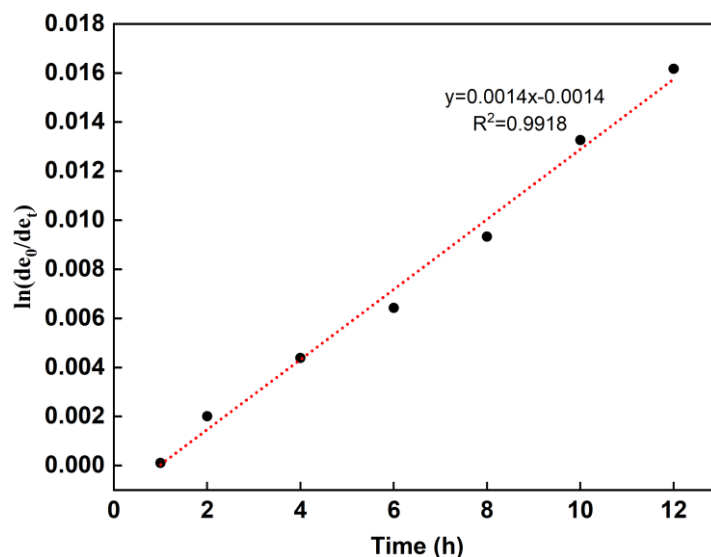

Figure S1. The plot of  $\ln(\text{de}_0/\text{de}_t)$  vs time of **3a** at 100 °C

$k_{\text{racemization}} (100 \text{ °C}) = 0.0014 \text{ h}^{-1} = 3.89 \times 10^{-7} \text{ s}^{-1}$ ;  $k_{\text{enantiomerization}} (100 \text{ °C}) = 7.8 \times 10^{-7} \text{ s}^{-1}$ ;  $\Delta G^\ddagger_{\text{enantiomerization}} = 140.03 \text{ kJ/mol} = 33.5 \text{ kcal/mol}$ ;  $t_{1/2} (25 \text{ °C}) = 6.0 \times 10^3 \text{ years}$ .

$$k_{\text{racemization}} = \ln\left(\frac{de_0}{de_t}\right)/t$$

de (%) = ([major diastereomer] - [minor diastereomer]) / ([major diastereomer] + [minor diastereomer]) × 100% = (% major diastereomer - % minor diastereomer)

Based on increasing retention time, the four peaks were designated as Peak (8.062min) to Peak (12.195 min). According to the liquid chromatography and single-crystal data of product **5a**, the configuration of Peak (10.448 min) was determined as (*S*<sub>a,C-O</sub>, *S*<sub>a,C-N</sub>), and its enantiomer, Peak (12.195 min), as (*R*<sub>a,C-O</sub>, *R*<sub>a,C-N</sub>). Combined with previous studies on the Co/Salox-catalyzed C-N axially chiral system<sup>10</sup> (ee > 99%), the configuration of Peak (8.062min) was assigned as (*S*<sub>a,C-O</sub>, *R*<sub>a,C-N</sub>); therefore, the configuration of Peak (9.008 min) is (*R*<sub>a,C-O</sub>, *S*<sub>a,C-N</sub>). Consequently, the de value for the C-O axis is given by % area [Peak (10.448 min) + Peak (8.062min)] – % area [Peak (12.195 min) + Peak (9.008 min)], and the de value for the C-N axis is given by % area [Peak (10.448 min) + Peak (9.008 min)] – % area [Peak (8.062min) + Peak (12.195 min)].

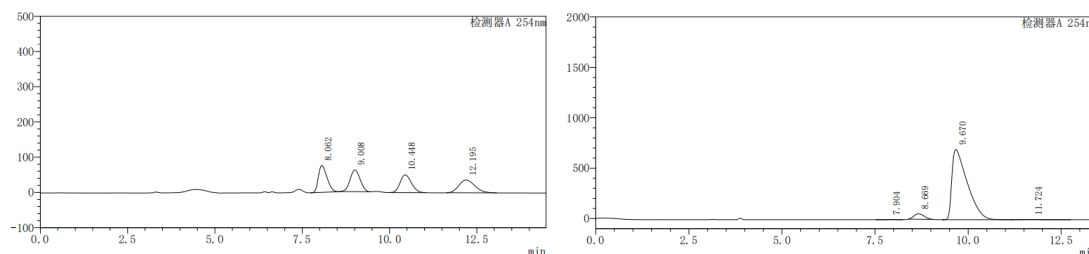

| Peak | RetTime | Area    | Height | Area%  |
|------|---------|---------|--------|--------|
| 1    | 8.062   | 1311582 | 76253  | 27.067 |
| 2    | 9.008   | 1241730 | 62093  | 25.626 |
| 3    | 10.448  | 1132267 | 50457  | 23.367 |
| 4    | 12.195  | 1160039 | 36429  | 23.940 |

| Peak | RetTime | Area     | Height | Area%  |
|------|---------|----------|--------|--------|
| 1    | 7.904   | 25664    | 2403   | 0.121  |
| 2    | 8.669   | 1030602  | 53640  | 4.869  |
| 3    | 9.670   | 20022539 | 696924 | 94.591 |
| 4    | 11.724  | 87512    | 2293   | 0.413  |

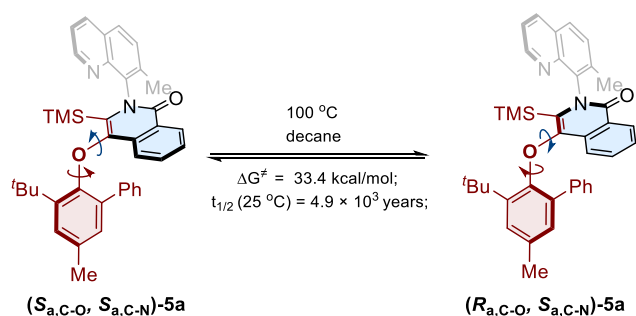

A solution of (*S*<sub>a,C-O</sub>, *S*<sub>a,C-N</sub>)-**5a** (10.0 mg, 99% ee) in decane (3 mL) was heated at the specific temperatures (Table S17). The de value was determined by chiral HPLC analysis at different intervals. The recovery of compounds **5a** was 91%.

**Table S17.** Thermal racemization of product **5a** at 100 °C

| Time (h) | 0      | 1      | 2     | 4      | 6      | 8      | 10     | 12     |
|----------|--------|--------|-------|--------|--------|--------|--------|--------|
| de (%)   | 98.702 | 98.386 | 98.14 | 97.992 | 97.548 | 97.252 | 97.087 | 96.665 |

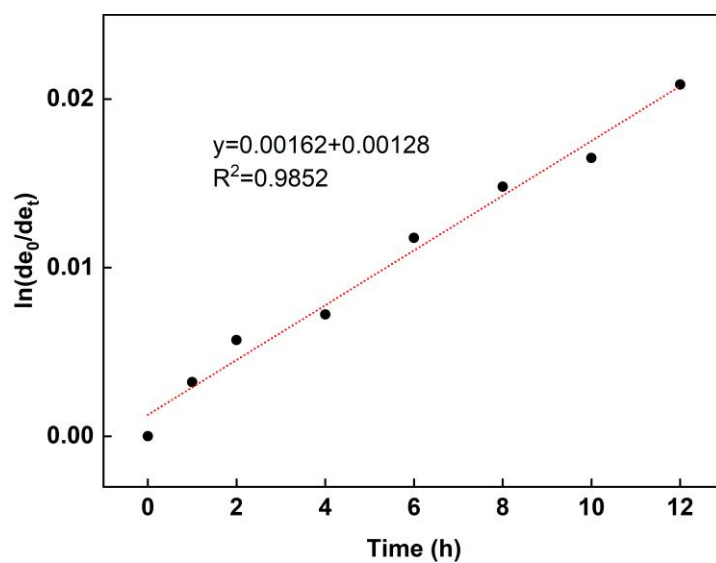

**Figure S2.** The plot of  $\ln(\text{de}_0/\text{de}_t)$  vs time of **5a** at 100 °C

$k_{\text{racemization}} (100 \text{ }^\circ\text{C}) = 0.0162 \text{ h}^{-1} = 4.5 \times 10^{-6} \text{ s}^{-1}$ ;  $k_{\text{enantiomerization}} (100 \text{ }^\circ\text{C}) = 2.25 \times 10^{-7} \text{ s}^{-1}$ ;  $\Delta G^\ddagger_{\text{enantiomerization}} = 147.1 \text{ kJ/mol} = 33.4 \text{ kcal/mol}$ ;  $t_{1/2} (25 \text{ }^\circ\text{C}) = 4.9 \times 10^3 \text{ years}$ .

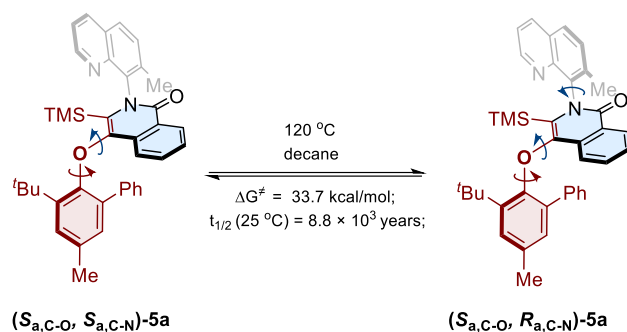

A solution of  $(S_{a,C-O}, S_{a,C-N})\text{-5a}$  (10.0 mg, 99% ee) in decane (3 mL) was heated at the specific temperatures (Table S18). The de value was determined by chiral HPLC analysis at different intervals. The recovery of compounds **5a** was 89%.

**Table S18.** Thermal racemization of product **5a** at 120 °C

| Time (h) | 0      | 1      | 2      | 4      | 6      | 8      | 10     | 12     |
|----------|--------|--------|--------|--------|--------|--------|--------|--------|
| de (%)   | 98.074 | 96.608 | 96.446 | 94.839 | 91.433 | 89.242 | 87.842 | 86.686 |

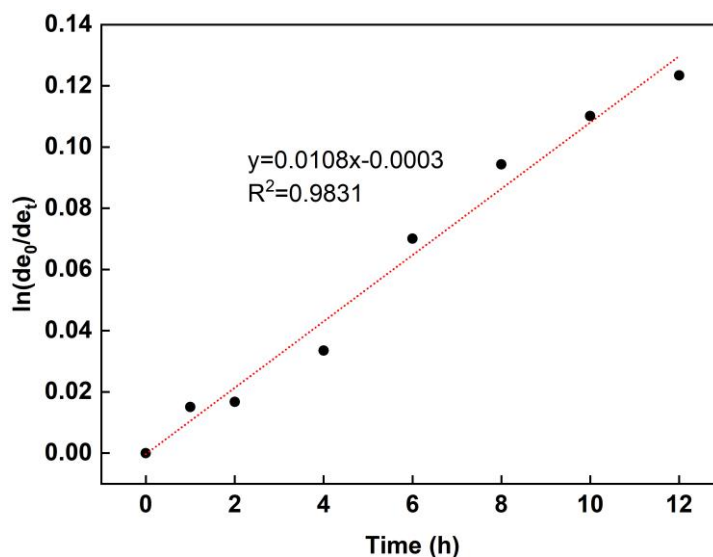

**Figure S3.** The plot of  $\ln(\text{de}_0/\text{de}_t)$  vs time of **5a** at 120 °C

$k_{\text{racemization}}(120\text{ }^\circ\text{C}) = 0.0108\text{ h}^{-1} = 3.0 \times 10^{-6}\text{ s}^{-1}$ ;  $k_{\text{enantiomerization}}(120\text{ }^\circ\text{C}) = 1.5.0 \times 10^{-6}\text{ s}^{-1}$ ;  $\Delta G^\ddagger_{\text{enantiomerization}} = 140.9\text{ kJ/mol} = 33.7\text{ kcal/mol}$ ;  $t_{1/2}(25\text{ }^\circ\text{C}) = 8.8 \times 10^3\text{ years}$ .

## Determination of the rotational barrier of **3zm** by variable-temperature NMR

Rotation around the stereogenic axis was induced thermally by heating the compounds, and the evolution of the diastereomeric ratio was monitored over time. The rate constant ( $k$ ) was determined using the method of initial rates according to the following equation<sup>11</sup>:

$$k = \ln \frac{(C_t(3a) - C_e(3a)) / (C_0(3a) - C_e(3a))}{t}$$

Where  $C$  represents the percentage of the major diastereomer determined from the <sup>1</sup>H NMR spectrum.  $C_0$ ,  $C_t$ , and  $C_e$  correspond to the percentages of the major diastereomer at the initial time ( $t = 0$ ), at time  $t$ , and at equilibrium, respectively.  $C_e$  was obtained by heating the NMR tube for an extended period until the diastereomeric ratio became constant. The diastereomerization constant ( $k_{\text{diastereomerization}}$ ) and the enantiomerization rate constant ( $k_{\text{enantiomerization}}$ ) were derived from the extrapolated kinetic data as shown in the corresponding graph. The Eyring equation was then applied to calculate the rotational energy barrier:

$$\Delta G^\ddagger_{\text{enantiomerization}} = RT \cdot \ln \frac{Tk_B}{hk}$$

$$k_{\text{diastereomerization}} = 2k_{\text{enantiomerization}}$$

Where:  $R = 8.31451 \text{ J}\cdot\text{K}^{-1}\cdot\text{mol}^{-1}$ ;  $h = 6.62608\cdot 10^{-34} \text{ J}\cdot\text{s}$  (Planck constant);  $k_B = 1.38066\cdot 10^{-23} \text{ J}\cdot\text{K}^{-1}$  (Boltzmann constant) and  $k$  is the previously calculated kinetic constant.

Protocol: Compound **3zl** (10.3 mg) was dissolved in  $\text{dmsO-d}_6$  (0.6 mL) in an NMR tube and placed in an oil bath preheated to 130 °C. The sample was periodically removed, cooled to room temperature, and analyzed by <sup>1</sup>H NMR spectroscopy to determine the percentage of the major diastereomer as a function of time (**Table S19 and Figure S4-S5**). Complete diastereomerization was achieved after heating for 5 h at 130 °C, affording a diastereomeric ratio of 1.14: 1 ( $C_e = 53.48\%$ ).

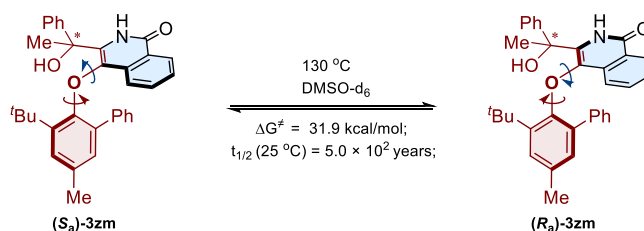

A solution of ( $S_a$ )-**3zm** (10.0 mg, 8.33:1 dr) in  $\text{dmsO-d}_6$  (0.6 mL) was heated at the specific temperatures (**Table S19**). The dr value was determined by <sup>1</sup>H NMR analysis at different intervals.

**Table S19.** The variation of product **3zm** at 130 °C in diastereomeric ratio over time

| time(min) | dr     | % of Major diastereomer (C <sub>i</sub> ) | $\ln((C_i - C_e)/(C_0 - C_e))$ |
|-----------|--------|-------------------------------------------|--------------------------------|
| 0         | 8.33:1 | 89.2857142857142                          | 0                              |
| 30        | 5.6:1  | 84.7457627118644                          | -0.135567                      |
| 90        | 3.33:1 | 76.9230769230769                          | -0.423472                      |
| 120       | 2.77:1 | 73.5294117647058                          | -0.580134                      |
| 150       | 2.66:1 | 72.7106369249631                          | -0.621505                      |
| 180       | 2.22:1 | 69.1012608405297                          | -0.829328                      |
| 210       | 1.91:1 | 0.66555183946488                          | -1.007194                      |

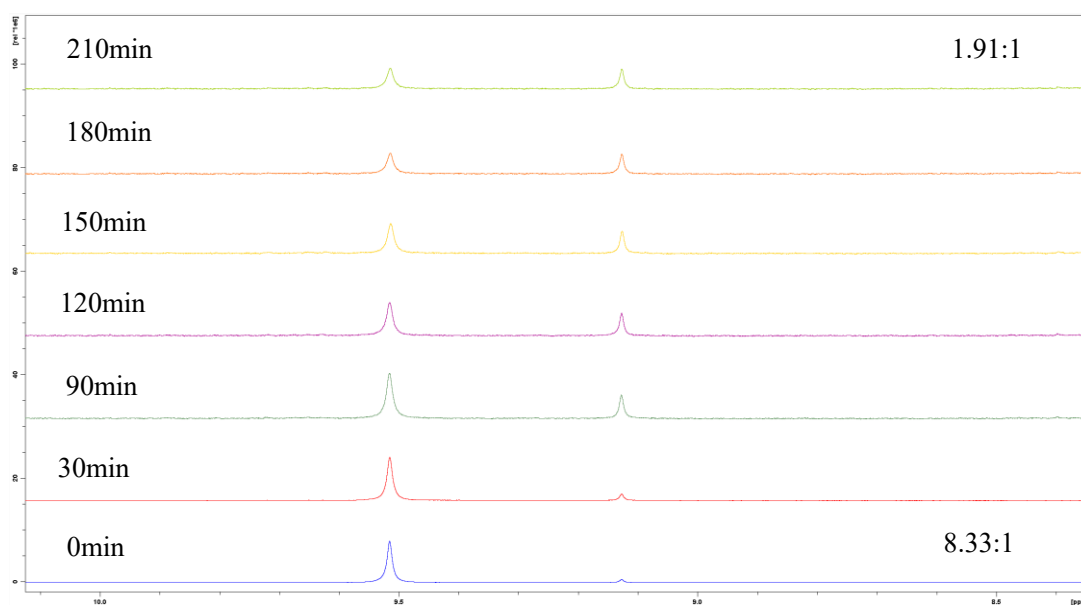

**Figure S4.** Stacked <sup>1</sup>H NMR spectra of **3zm** (alcohol region)

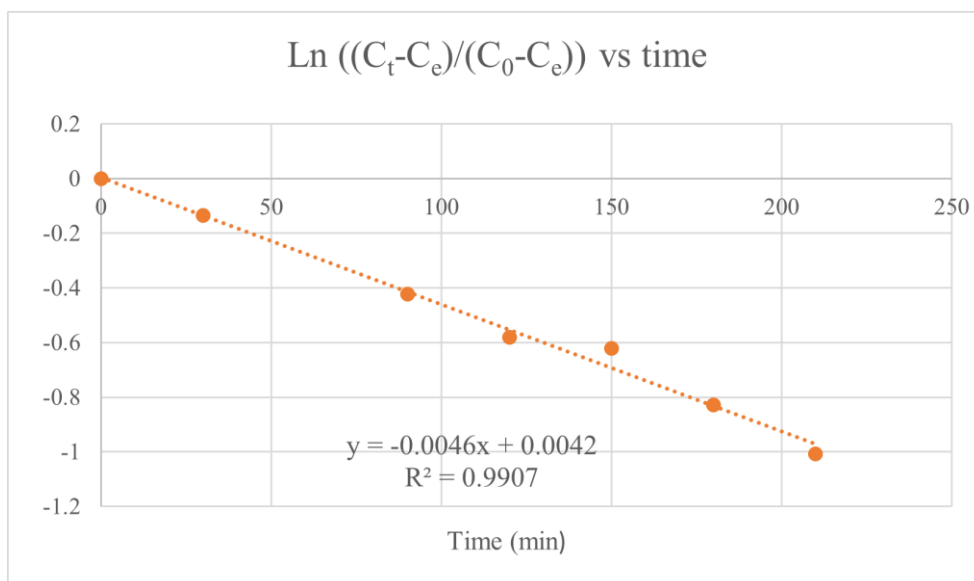

**Figure S5.** Ln  $((C_t - C_e)/(C_0 - C_e))$  vs time of **3zm** at 130 °C

$k_{\text{diastereomerization}} = 0.046 \text{ min}^{-1} = 7.66 \times 10^{-5} \text{ s}^{-1}$ ;  $k_{\text{enantiomerization}} = 0.023 \text{ min}^{-1} = 3.38 \times 10^{-5} \text{ s}^{-1}$   $\Delta G^\ddagger = 133.8 \text{ kJ.mol}^{-1} = 31.9 \text{ kcal/mol}$ ; half-life of diastereomerization:  $t_{1/2}$  at 130 °C = 0.1 days = 2.5 h;  $t_{1/2}$  at 25 °C = 500 years

## 8. The non-linear effect studies

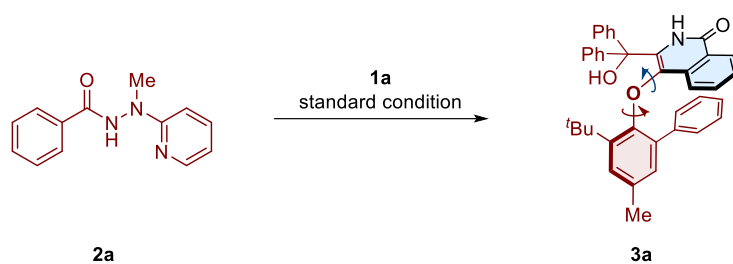

**Table S20.** The nonlinear effect study between the ee of **L8** and the ee of **3a**

|                 |   |    |    |    |    |     |
|-----------------|---|----|----|----|----|-----|
| ee of <b>L8</b> | 0 | 20 | 40 | 60 | 80 | 100 |
| ee of <b>5a</b> | 0 | 23 | 41 | 63 | 81 | 96  |

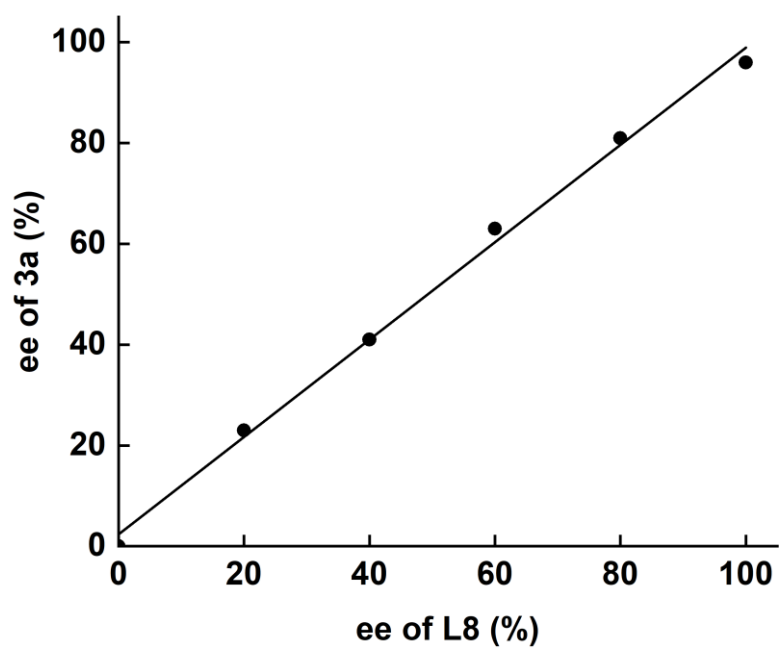

**Figure S6.** The nonlinear effect study between the ee of **L8** and the ee of **3a**

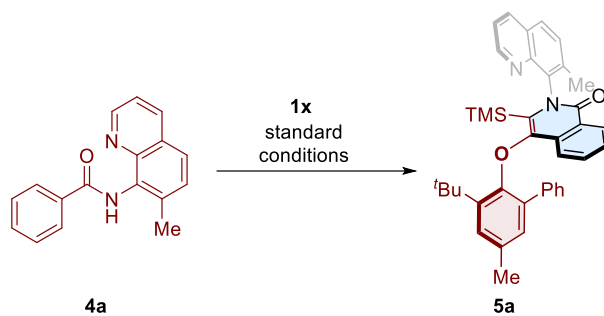

**Table S21.** The nonlinear effect study between the ee of **L8** and the ee of **5a**

|                 |   |    |    |    |    |     |
|-----------------|---|----|----|----|----|-----|
| ee of <b>L8</b> | 0 | 20 | 40 | 60 | 80 | 100 |
| de of <b>5a</b> | 0 | 41 | 57 | 80 | 89 | 99  |

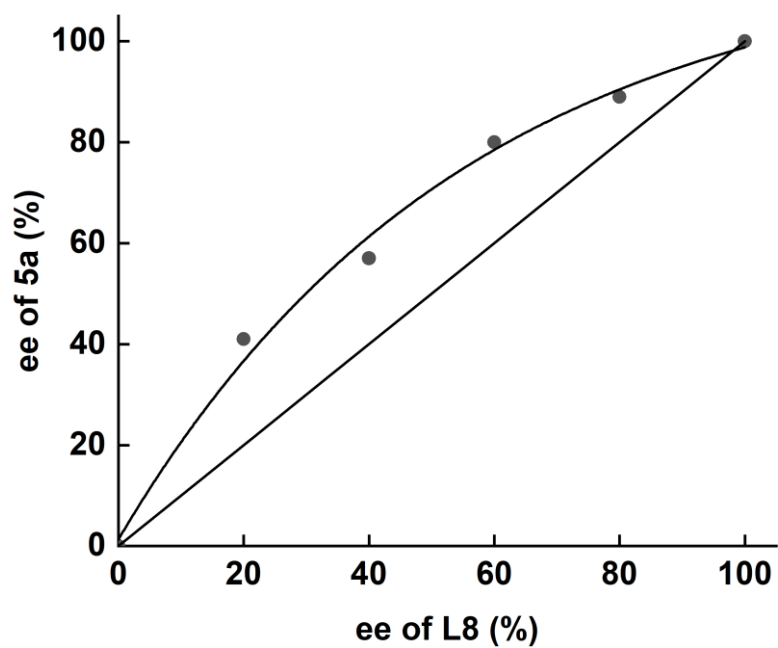

**Figure S7.** The nonlinear effect study between the ee of **L8** and the ee of **5a**

## 9. X-ray crystal structure of 3za and 5a.

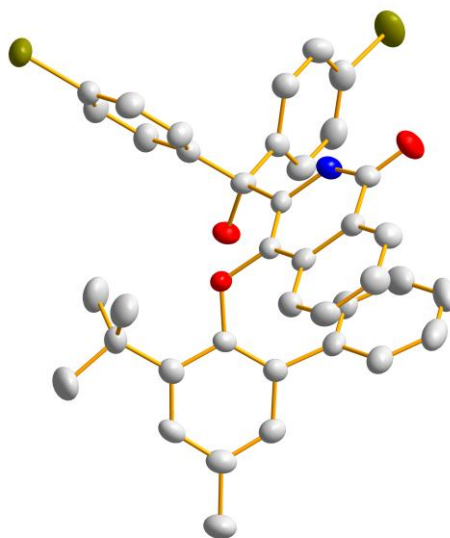

**Figure S8.** X-ray molecular structure of **3za** (CCDC 2516693).

### Crystal data and structure refinement for 3za

|                              |                                                                                 |
|------------------------------|---------------------------------------------------------------------------------|
| Identification code          | <b>3za</b>                                                                      |
| Empirical formula            | C <sub>40</sub> H <sub>35</sub> Br <sub>2</sub> Cl <sub>2</sub> NO <sub>3</sub> |
| Formula weight               | 808.41                                                                          |
| Temperature/K                | 100.00(10)                                                                      |
| Crystal system               | orthorhombic                                                                    |
| Space group                  | P2 <sub>1</sub> 2 <sub>1</sub> 2 <sub>1</sub>                                   |
| a/Å                          | 9.10830(10)                                                                     |
| b/Å                          | 12.79910(10)                                                                    |
| c/Å                          | 30.4943(3)                                                                      |
| $\alpha$ /°                  | 90                                                                              |
| $\beta$ /°                   | 90                                                                              |
| $\gamma$ /°                  | 90                                                                              |
| Volume/Å <sup>3</sup>        | 3554.97(6)                                                                      |
| Z                            | 4                                                                               |
| $\rho$ calcg/cm <sup>3</sup> | 1.510                                                                           |
| $\mu$ /mm <sup>-1</sup>      | 4.589                                                                           |
| F(000)                       | 1640.0                                                                          |
| Crystal size/mm <sup>3</sup> | 0.125 × 0.082 × 0.054                                                           |
| Radiation                    | Cu K $\alpha$ ( $\lambda$ = 1.54184)                                            |

|                                             |                                                                        |
|---------------------------------------------|------------------------------------------------------------------------|
| 2 $\theta$ range for data collection/°      | 5.796 to 153.74                                                        |
| Index ranges                                | -11 $\leq$ h $\leq$ 10, -12 $\leq$ k $\leq$ 16, -38 $\leq$ l $\leq$ 36 |
| Reflections collected                       | 21865                                                                  |
| Independent reflections                     | 7226 [R <sub>int</sub> = 0.0276, R <sub>sigma</sub> = 0.0263]          |
| Data/restraints/parameters                  | 7226/1/448                                                             |
| Goodness-of-fit on F <sup>2</sup>           | 1.057                                                                  |
| Final R indexes [I $\geq$ 2 $\sigma$ (I)]   | R <sub>1</sub> = 0.0270, wR <sub>2</sub> = 0.0710                      |
| Final R indexes [all data]                  | R <sub>1</sub> = 0.0281, wR <sub>2</sub> = 0.0718                      |
| Largest diff. peak/hole / e Å <sup>-3</sup> | 0.49/-0.70                                                             |
| Flack parameter                             | -0.029(6)                                                              |

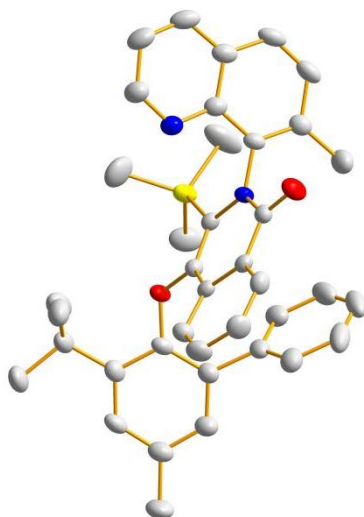

**Figure S9.** X-ray molecular structure of **5a** (CCDC 2504636).

**Crystal data and structure refinement for 5a**

|                                        |                                                                                  |
|----------------------------------------|----------------------------------------------------------------------------------|
| Identification code                    | <b>5a</b>                                                                        |
| Empirical formula                      | C <sub>40</sub> H <sub>42</sub> Cl <sub>2</sub> N <sub>2</sub> O <sub>2</sub> Si |
| Formula weight                         | 681.74                                                                           |
| Temperature/K                          | 100.00(10)                                                                       |
| Crystal system                         | orthorhombic                                                                     |
| Space group                            | P212121                                                                          |
| a/Å                                    | 11.91760(10)                                                                     |
| b/Å                                    | 13.74860(10)                                                                     |
| c/Å                                    | 22.4163(2)                                                                       |
| $\alpha$ /°                            | 90                                                                               |
| $\beta$ /°                             | 90                                                                               |
| $\gamma$ /°                            | 90                                                                               |
| Volume/Å <sup>3</sup>                  | 3672.92(5)                                                                       |
| Z                                      | 4                                                                                |
| $\rho_{\text{calc}}$ /cm <sup>3</sup>  | 1.233                                                                            |
| $\mu$ /mm <sup>-1</sup>                | 2.181                                                                            |
| F(000)                                 | 1440                                                                             |
| Crystal size/mm <sup>3</sup>           | 0.153 × 0.122 × 0.121                                                            |
| Radiation                              | Cu K $\alpha$ ( $\lambda$ = 1.54184)                                             |
| 2 $\theta$ range for data collection/° | 7.544 to 148.006                                                                 |

|                                             |                                                              |
|---------------------------------------------|--------------------------------------------------------------|
| Index ranges                                | $-14 \leq h \leq 14, -14 \leq k \leq 17, -27 \leq l \leq 27$ |
| Reflections collected                       | 19214                                                        |
| Independent reflections                     | 7228 [Rint = 0.0233, Rsigma = 0.0216]                        |
| Data/restraints/parameters                  | 7228/1/442                                                   |
| Goodness-of-fit on F <sup>2</sup>           | 1.039                                                        |
| Final R indexes [ $I \geq 2\sigma(I)$ ]     | R1 = 0.0361, wR2 = 0.0973                                    |
| Final R indexes [all data]                  | R1 = 0.0368, wR2 = 0.0978                                    |
| Largest diff. peak/hole / e Å <sup>-3</sup> | 0.44/-0.52                                                   |
| Flack parameter                             | 0.014(7)                                                     |

#### Method for crystal growth:

The 10 mg of pure compound **3za** and **5a** was dissolved in 1 mL DCM in a little sample bottle. And 2 mL *n*-hexane was added dropwise in the bottle. Then, the bottle is sealed with plastic film, and two holes are made in the plastic film. The bottle was placed in a quiet environment.

#### Crystal measurement:

A DCM and ethyl acetate mixture of **3za** (CCDC 2516693) and **5a** (CCDC 2504636) were slowly evaporated at ambient temperature over a period of three days, to afford single crystals suitable for an X-ray crystallographic study. Single-crystal X-ray diffraction data were collected on a Rigaku XtaLAB Pro diffractometer with Cu-K $\alpha$  radiation ( $\lambda = 1.54184 \text{ \AA}$ ) for compound **3za** and **5a**. The structure was solved by Direct Method of SHELXS-97 and refined by full-matrix least-squares techniques using the SHELXL-97 program. Non-hydrogen atoms were refined with anisotropic temperature parameters, and hydrogen atoms of the ligands were refined as rigid groups.

## 10. Optical properties.

### 10.1 The optical properties were characterized by UV-Vis absorption and photoluminescence spectroscopy

**Table S21.** UV-Vis absorption data, fluorescence spectra data and quantum yields of **3a-3q**.

| Compounds | $\lambda_{\text{abs}}$ (nm) <sup>a</sup> | $\lambda_{\text{ex}}$ (nm) <sup>b</sup> | $\lambda_{\text{em}}$ (nm) <sup>c</sup> | QY (%) <sup>d</sup> |
|-----------|------------------------------------------|-----------------------------------------|-----------------------------------------|---------------------|
| <b>3a</b> | 284                                      | 255                                     | 410                                     | 2.27                |
| <b>3b</b> | 285                                      | 255                                     | 407                                     | -- <sup>e</sup>     |
| <b>3c</b> | 286                                      | 255                                     | 409                                     | -- <sup>e</sup>     |
| <b>3d</b> | 286                                      | 263                                     | 373                                     | -- <sup>e</sup>     |
| <b>3e</b> | 285                                      | 263                                     | 373                                     | -- <sup>e</sup>     |
| <b>3f</b> | 288                                      | 255                                     | 406                                     | -- <sup>e</sup>     |
| <b>3g</b> | 287                                      | 255                                     | 408                                     | -- <sup>e</sup>     |
| <b>3h</b> | 279                                      | 269                                     | 444                                     | -- <sup>e</sup>     |
| <b>3i</b> | 321                                      | 255                                     | 402                                     | -- <sup>e</sup>     |
| <b>3j</b> | 288                                      | 255                                     | 415                                     | 4.16                |
| <b>3k</b> | 281                                      | 262                                     | 371                                     | 3.43                |
| <b>3l</b> | 257                                      | 255                                     | 421                                     | -- <sup>e</sup>     |
| <b>3m</b> | 288                                      | 310                                     | 421                                     | -- <sup>e</sup>     |
| <b>3n</b> | 287                                      | 301                                     | 409                                     | -- <sup>e</sup>     |
| <b>3o</b> | 286                                      | 261                                     | 372                                     | -- <sup>e</sup>     |
| <b>3p</b> | 286                                      | 292                                     | 445                                     | -- <sup>e</sup>     |
| <b>3q</b> | 329                                      | 325                                     | 518                                     | 2.50                |

<sup>a</sup>UV-Vis absorption data, <sup>b</sup>excitation wavelength (concentration:  $1 \times 10^{-5}$  mol/L, in  $\text{CH}_2\text{Cl}_2$ ), <sup>c</sup>maximum emission wavelength (concentration:  $1 \times 10^{-5}$  mol/L, in  $\text{CH}_2\text{Cl}_2$ ), <sup>d</sup>Quantum yield (concentration:  $1 \times 10^{-5}$  mol/L, in  $\text{CH}_2\text{Cl}_2$ ). <sup>e</sup>The QY was not measured.

**Table S22.** UV-Vis absorption data, fluorescence spectra data and quantum yields of **3r-3zn**.

| Compounds  | $\lambda_{\text{abs}}$ (nm) <sup>a</sup> | $\lambda_{\text{ex}}$ (nm) <sup>b</sup> | $\lambda_{\text{em}}$ (nm) <sup>c</sup> | QY (%) <sup>d</sup> |
|------------|------------------------------------------|-----------------------------------------|-----------------------------------------|---------------------|
| <b>3r</b>  | 276                                      | 255                                     | 407                                     | -- <sup>e</sup>     |
| <b>3s</b>  | 273                                      | 255                                     | 409                                     | -- <sup>e</sup>     |
| <b>3t</b>  | 275                                      | 255                                     | 411                                     | -- <sup>e</sup>     |
| <b>3u</b>  | 274                                      | 257                                     | 408                                     | -- <sup>e</sup>     |
| <b>3v</b>  | 274                                      | 261                                     | 412                                     | -- <sup>e</sup>     |
| <b>3w</b>  | 276                                      | 255                                     | 408                                     | -- <sup>e</sup>     |
| <b>3x</b>  | 274                                      | 306                                     | 409                                     | -- <sup>e</sup>     |
| <b>3y</b>  | 274                                      | 305                                     | 407                                     | -- <sup>e</sup>     |
| <b>3z</b>  | 276                                      | 255                                     | 406                                     | -- <sup>e</sup>     |
| <b>3za</b> | 275                                      | 308                                     | 409                                     | -- <sup>e</sup>     |
| <b>3zb</b> | 316                                      | 308                                     | 409                                     | -- <sup>e</sup>     |
| <b>3zc</b> | 261                                      | 257                                     | 412                                     | -- <sup>e</sup>     |
| <b>3zd</b> | 275                                      | 255                                     | 409                                     | -- <sup>e</sup>     |
| <b>3ze</b> | 274                                      | 241                                     | 405                                     | -- <sup>e</sup>     |
| <b>3zf</b> | 277                                      | 306                                     | 408                                     | -- <sup>e</sup>     |
| <b>3zh</b> | 284                                      | 263                                     | 373                                     | -- <sup>e</sup>     |
| <b>3zi</b> | 286                                      | 298                                     | 414                                     | -- <sup>e</sup>     |
| <b>3zj</b> | 286                                      | 296                                     | 414                                     | -- <sup>e</sup>     |
| <b>3zk</b> | 286                                      | 255                                     | 409                                     | -- <sup>e</sup>     |
| <b>3zm</b> | 285                                      | 304                                     | 412                                     | -- <sup>e</sup>     |
| <b>3zn</b> | 286                                      | 255                                     | 410                                     | -- <sup>e</sup>     |

<sup>a</sup>UV-Vis absorption data, <sup>b</sup>excitation wavelength (concentration:  $1 \times 10^{-5}$  mol/L, in  $\text{CH}_2\text{Cl}_2$ ), <sup>c</sup>maximum emission wavelength (concentration:  $1 \times 10^{-5}$  mol/L, in  $\text{CH}_2\text{Cl}_2$ ), <sup>d</sup>Quantum yield (concentration:  $1 \times 10^{-5}$  mol/L, in  $\text{CH}_2\text{Cl}_2$ ). <sup>e</sup>The QY was not measured.

**Table S23.** UV-Vis absorption data, fluorescence spectra data and quantum yields of **5a-5zd**.

| <b>Compounds</b> | $\lambda_{\text{abs}}$ (nm) <sup>a</sup> | $\lambda_{\text{ex}}$ (nm) <sup>b</sup> | $\lambda_{\text{em}}$ (nm) <sup>c</sup> | <b>QY (%)</b> <sup>d</sup> |
|------------------|------------------------------------------|-----------------------------------------|-----------------------------------------|----------------------------|
| <b>5a</b>        | 321                                      | 260                                     | 446                                     | 0.2                        |
| <b>5b</b>        | 321                                      | 260                                     | 436                                     | -- <sup>e</sup>            |
| <b>5c</b>        | 320                                      | 290                                     | 444                                     | -- <sup>e</sup>            |
| <b>5d</b>        | 321                                      | 295                                     | 447                                     | -- <sup>e</sup>            |
| <b>5g</b>        | 321                                      | 285                                     | 500                                     | -- <sup>e</sup>            |
| <b>5h</b>        | 281                                      | 330                                     | 466                                     | -- <sup>e</sup>            |
| <b>5h</b>        | 321                                      | 285                                     | 496                                     | -- <sup>e</sup>            |
| <b>5i</b>        | 321                                      | 295                                     | 460                                     | 0.71                       |
| <b>5j</b>        | 321                                      | 295                                     | 501                                     | 4.56                       |
| <b>5k</b>        | 321                                      | 340                                     | 466                                     | -- <sup>e</sup>            |
| <b>5m</b>        | 286                                      | 335                                     | 426                                     | 6.88                       |
| <b>5n</b>        | 321                                      | 255                                     | 445                                     | -- <sup>e</sup>            |
| <b>5q</b>        | 321                                      | 285                                     | 482                                     | -- <sup>e</sup>            |
| <b>5r</b>        | 321                                      | 290                                     | 398                                     | -- <sup>e</sup>            |
| <b>5s</b>        | 321                                      | 350                                     | 462                                     | -- <sup>e</sup>            |
| <b>5t</b>        | 321                                      | 350                                     | 444                                     | -- <sup>e</sup>            |
| <b>5u</b>        | 321                                      | 285                                     | 432                                     | -- <sup>e</sup>            |
| <b>5v</b>        | 284                                      | 375                                     | 540                                     | -- <sup>e</sup>            |
| <b>5w</b>        | 321                                      | 260                                     | 502                                     | -- <sup>e</sup>            |
| <b>5x</b>        | 321                                      | 270                                     | 415                                     | -- <sup>e</sup>            |
| <b>5zc</b>       | 309                                      | 265                                     | 467                                     | -- <sup>e</sup>            |
| <b>5zd</b>       | 294                                      | 275                                     | 414                                     | -- <sup>e</sup>            |

<sup>a</sup>UV-Vis absorption data, <sup>b</sup>excitation wavelength (concentration:  $1 \times 10^{-4}$  mol/L, in  $\text{CH}_2\text{Cl}_2$ ), <sup>c</sup>maximum emission wavelength (concentration:  $1 \times 10^{-4}$  mol/L, in  $\text{CH}_2\text{Cl}_2$ ), <sup>d</sup>Quantum yield (concentration:  $1 \times 10^{-4}$  mol/L, in  $\text{CH}_2\text{Cl}_2$ ). <sup>e</sup>The QY was not measured.

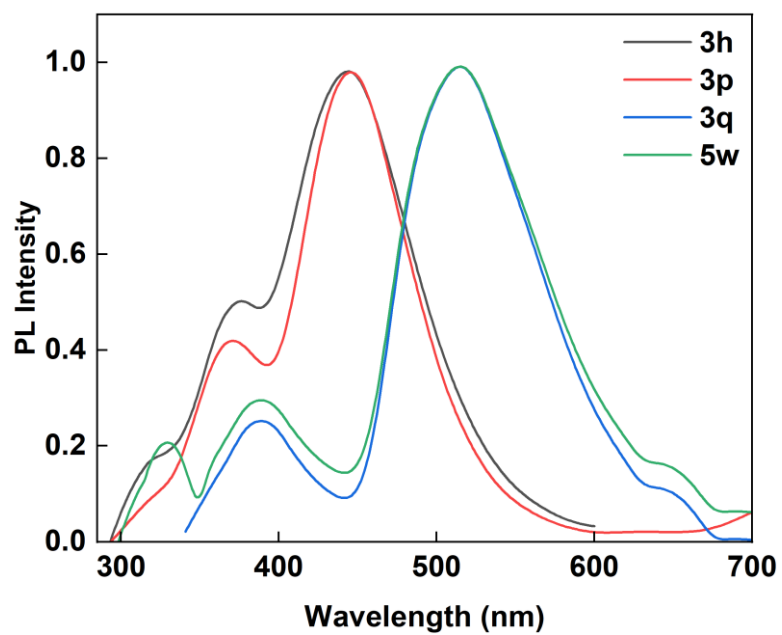

**Figure S10.** The Fluorescence emission spectrum of 3h, 3p, 3q and 5w

## 11. Characterization data and HPLC chromatograms

(*S<sub>a</sub>*)-4-((3-(tert-butyl)-5-methyl-[1,1'-biphenyl]-2-yl)oxy)-3-(hydroxydiphenylmethyl)isoquinolin-1(2H)-one

(3a)

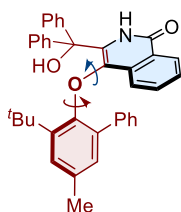

(PE:EA = 4:1) White solid. (50.4 mg, 89% yield, 96% ee). mp: 125–126 °C.

<sup>1</sup>H NMR (600 MHz, CDCl<sub>3</sub>) δ 8.21 – 8.15 (m, 1H), 7.42 – 7.34 (m, 5H), 7.32 – 7.26 (m, 6H), 7.26 – 7.22 (m, 3H), 7.07 (dd, *J* = 6.9, 3.0 Hz, 1H), 7.03 (t, *J* = 7.3 Hz, 1H), 6.92 (s, 2H), 6.69 (s, 2H), 4.96 (s, 1H), 2.31 (s, 3H), 1.09 (s, 9H).

<sup>13</sup>C NMR (151 MHz, CDCl<sub>3</sub>) δ 159.4, 149.9, 145.7, 141.5, 139.5, 138.0, 133.9, 133.4, 132.5, 132.4, 132.2, 131.7, 130.1, 129.9, 129.1, 129.0, 128.7, 128.3, 128.2, 128.1, 127.5, 126.8, 126.6, 126.5, 125.2, 122.1, 81.2, 35.0, 30.1, 20.9.

HRMS (ESI): *m/z* [M+Na]<sup>+</sup> calcd for [C<sub>39</sub>H<sub>35</sub>NNaO<sub>3</sub>]<sup>+</sup> required 588.2515, found 588.2511.

[α]<sub>D</sub><sup>25</sup> = +84.67 (c = 0.05, CH<sub>2</sub>Cl<sub>2</sub>).

**HPLC Condition:** The enantiomeric excess was determined by HPLC analysis on a Daicel Chiralcel IC, Hexanes/IPA = 80/20, 1.0 mL/min, λ = 254 nm, *t* (minor) = 6.360 min, *t* (major) = 8.761 min.

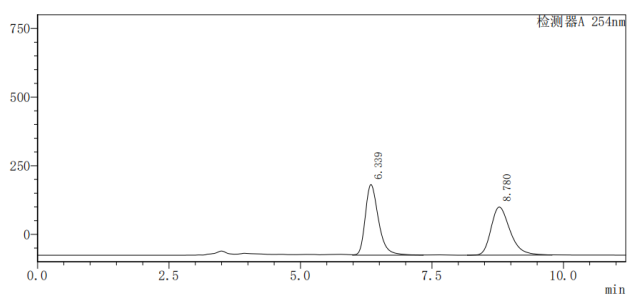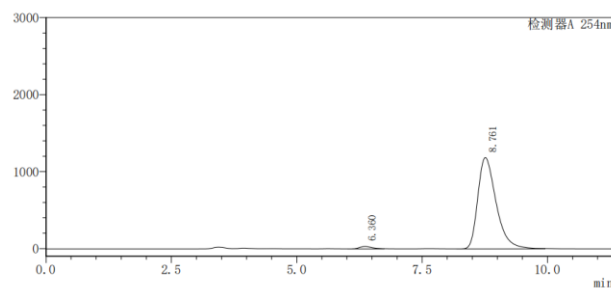

| Peak | Ret. Time | Area    | Height | Area%  |
|------|-----------|---------|--------|--------|
| 1    | 6.339     | 4498838 | 257041 | 50.526 |
| 2    | 8.780     | 4405196 | 175220 | 49.474 |

| Peak | Ret. Time | Area     | Height  | Area%  |
|------|-----------|----------|---------|--------|
| 1    | 6.360     | 576664   | 32628   | 1.874  |
| 2    | 8.761     | 30195835 | 1186981 | 98.126 |

**(*S<sub>a</sub>*)-4-((3-(tert-butyl)-5-methyl-[1,1'-biphenyl]-2-yl)oxy)-6-fluoro-3-(hydroxydiphenylmethyl)isoquinolin-1(2H)-one (3b)**

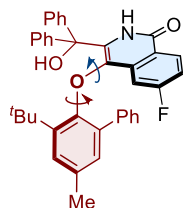

(PE:EA = 4:1) White solid. (40.3 mg, 69% yield, 96% ee). mp: 123–124 °C.

<sup>1</sup>H NMR (600 MHz, CDCl<sub>3</sub>) δ 8.18 (t, *J* = 7.4 Hz, 1H), 7.41 (d, *J* = 7.0 Hz, 3H), 7.33 – 7.20 (m, 9H), 7.07 (dt, *J* = 14.5, 8.4 Hz, 2H), 6.96 (s, 3H), 6.72 (s, 1H), 6.67 (d, *J* = 11.0 Hz, 1H), 4.85 (s, 1H), 2.33 (s, 3H), 1.08 (s, 9H).

<sup>13</sup>C NMR (151 MHz, CDCl<sub>3</sub>) δ 165.6 (d, <sup>1</sup>*J*<sub>C-F</sub> = 252.1 Hz), 158.8, 149.3, 145.5, 141.3, 139.6, 138.0, 135.7 (d, <sup>3</sup>*J*<sub>C-F</sub> = 10.4 Hz), 133.4 (d, <sup>4</sup>*J*<sub>C-F</sub> = 3.2 Hz), 133.0, 132.3 (d, <sup>3</sup>*J*<sub>C-F</sub> = 7.2 Hz), 131.6, 131.5, 131.4, 130.2, 129.3, 129.1, 128.8, 128.4, 127.4, 127.0, 126.9, 121.9, 115.4 (d, <sup>2</sup>*J*<sub>C-F</sub> = 23.5 Hz), 108.1 (d, <sup>2</sup>*J*<sub>C-F</sub> = 25.4 Hz), 81.3, 35.1, 30.2, 21.0.

<sup>19</sup>F NMR (565 MHz, CDCl<sub>3</sub>) δ -104.72.

HRMS (ESI): *m/z* [M+K]<sup>+</sup> calcd for [C<sub>39</sub>H<sub>34</sub>FKNO<sub>3</sub>]<sup>+</sup> required 622.2160, found 622.2151.

[α]<sub>D</sub><sup>25</sup> = -22.67 (c = 0.05, CH<sub>2</sub>Cl<sub>2</sub>).

**HPLC Condition:** The enantiomeric excess was determined by HPLC analysis on a Daicel Chiralcel IC, Hexanes/IPA = 80/20, 1.0 mL/min, λ = 254 nm, *t* (minor) = 5.268 min, *t* (major) = 6.777 min.

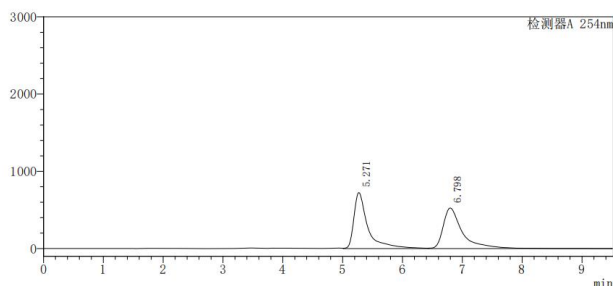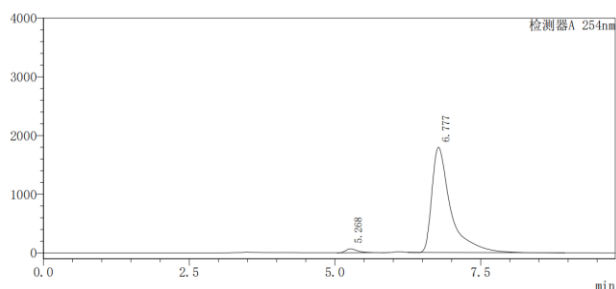

| Peak | Ret. Time | Area     | Height | Area%  |
|------|-----------|----------|--------|--------|
| 1    | 5.271     | 11758245 | 724220 | 50.128 |
| 2    | 6.798     | 11698298 | 525099 | 49.872 |

| Peak | Ret. Time | Area     | Height  | Area%  |
|------|-----------|----------|---------|--------|
| 1    | 5.268     | 921377   | 67615   | 2.240  |
| 2    | 6.777     | 40215660 | 1791565 | 97.760 |

**(*S*<sub>a</sub>)-4-((3-(tert-butyl)-5-methyl-[1,1'-biphenyl]-2-yl)oxy)-6-chloro-3-(hydroxydiphenylmethyl)isoquinolin-1(2H)-one (3c)**

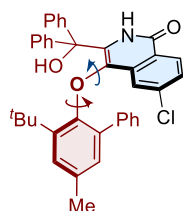

(PE:EA = 4:1) White solid. (43.2 mg, 72% yield, 96% ee). mp: 117–118 °C.

<sup>1</sup>H NMR (600 MHz, CDCl<sub>3</sub>) δ 8.09 (d, *J* = 8.6 Hz, 1H), 7.41 (d, *J* = 6.9 Hz, 3H), 7.31 (d, *J* = 7.6 Hz, 4H), 7.29 – 7.24 (m, 4H), 7.22 (d, *J* = 7.2 Hz, 2H), 7.05 (t, *J* = 7.3 Hz, 1H), 7.01 (s, 1H), 6.96 (s, 2H), 6.73 (s, 2H), 4.85 (s, 1H), 2.34 (s, 3H), 1.08 (s, 9H).

<sup>13</sup>C NMR (151 MHz, CDCl<sub>3</sub>) δ 158.9, 149.5, 145.5, 141.3, 139.6, 138.6, 138.0, 134.6, 133.1, 133.0, 132.3 (2C), 131.5, 130.3, 130.0, 129.3, 129.1, 128.8, 128.4, 128.3, 127.4, 127.1, 127.0, 126.7, 123.6, 122.0, 81.3, 35.1, 30.2, 21.0.

HRMS (ESI): *m/z* [M+K]<sup>+</sup> calcd for [C<sub>39</sub>H<sub>34</sub>ClKNO<sub>3</sub>]<sup>+</sup> required 638.1864, found 638.1854.

[α]<sub>D</sub><sup>25</sup> = -51.33 (c = 0.05, CH<sub>2</sub>Cl<sub>2</sub>).

**HPLC Condition:** The enantiomeric excess was determined by HPLC analysis on a Daicel Chiralcel IC, Hexanes/IPA = 80/20, 1.0 mL/min, λ = 254 nm, *t* (minor) = 5.209 min, *t* (major) = 6.952 min.

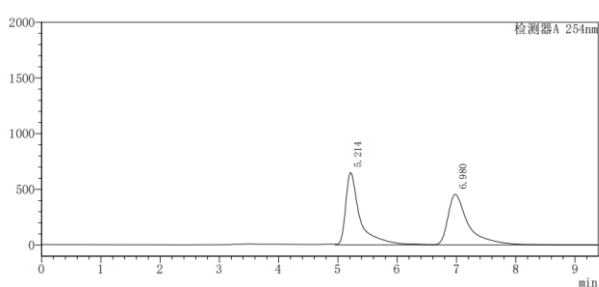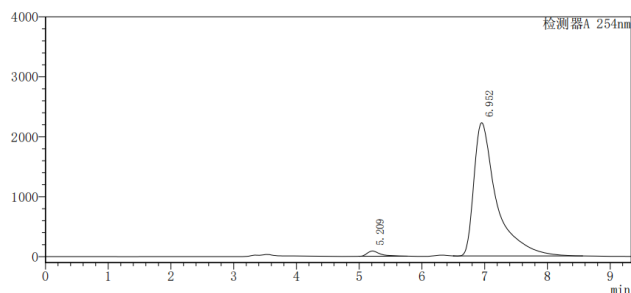

| Peak | Ret. Time | Area     | Height | Area%  |
|------|-----------|----------|--------|--------|
| 1    | 5.214     | 11069934 | 649554 | 50.286 |
| 2    | 6.980     | 10944073 | 452947 | 49.714 |

| Peak | Ret. Time | Area     | Height  | Area%  |
|------|-----------|----------|---------|--------|
| 1    | 5.209     | 1256332  | 87382   | 2.199  |
| 2    | 6.952     | 55865539 | 2222876 | 97.801 |

**(*S*<sub>a</sub>)-6-bromo-4-((3-(tert-butyl)-5-methyl-[1,1'-biphenyl]-2-yl)oxy)-3-(hydroxydiphenylmethyl)isoquinolin-1(2H)-one (3d)**

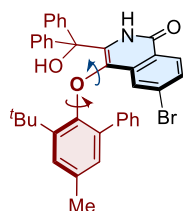

(PE:EA = 4:1) White solid. (59.3 mg, 92% yield, 96% ee). mp: 118–119 °C.

<sup>1</sup>H NMR (600 MHz, CDCl<sub>3</sub>) δ 8.01 (d, *J* = 8.5 Hz, 1H), 7.47 (d, *J* = 8.6 Hz, 1H), 7.40 (d, *J* = 6.6 Hz, 3H), 7.30 (d, *J* = 7.2 Hz, 4H), 7.26 (d, *J* = 7.7 Hz, 3H), 7.22 (d, *J* = 7.2 Hz, 2H), 7.18 (s, 1H), 7.05 (t, *J* = 7.4 Hz, 1H), 6.96 (s, 2H), 6.74 (s, 2H), 4.86 (s, 1H), 2.34 (s, 3H), 1.08 (s, 9H).

<sup>13</sup>C NMR (151 MHz, CDCl<sub>3</sub>) δ 159.0, 149.5, 145.5, 141.3, 139.6, 138.0, 134.7, 133.1, 132.9, 132.4, 132.2, 131.4, 130.3, 129.9, 129.8, 129.3, 129.1, 128.7, 128.4, 128.3, 127.4, 127.1, 127.0, 126.7, 125.2, 123.9, 81.3, 35.1, 30.1, 21.0.

HRMS (ESI): *m/z* [M+H]<sup>+</sup> calcd for [C<sub>39</sub>H<sub>35</sub>BrNO<sub>3</sub>]<sup>+</sup> required 644.1800, found 644.1802.

[α]<sub>D</sub><sup>25</sup> = -77.33 (c = 0.05, CH<sub>2</sub>Cl<sub>2</sub>).

**HPLC Condition:** The enantiomeric excess was determined by HPLC analysis on a Daicel Chiralcel IC, Hexanes/IPA = 80/20, 1.0 mL/min, λ = 254 nm, *t* (minor) = 5.355 min, *t* (major) = 7.119 min.

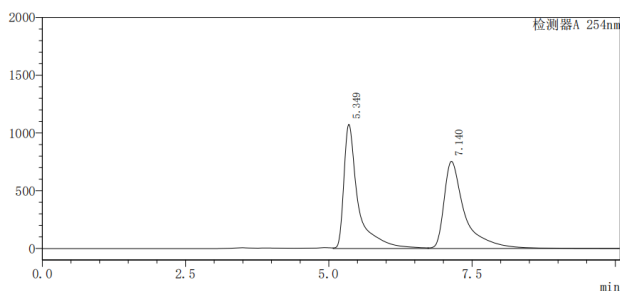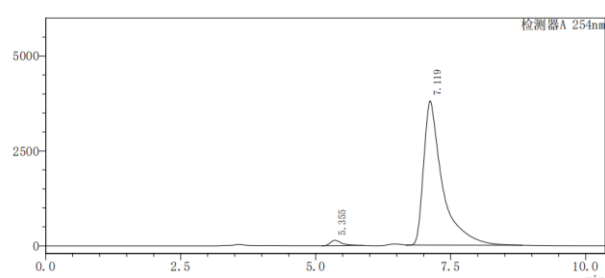

| Peak | Ret. Time | Area     | Height  | Area%  |
|------|-----------|----------|---------|--------|
| 1    | 5.349     | 18802881 | 1075669 | 49.807 |
| 2    | 7.140     | 18948747 | 755178  | 50.193 |

| Peak | Ret. Time | Area     | Height  | Area%  |
|------|-----------|----------|---------|--------|
| 1    | 5.355     | 2038306  | 140829  | 2.168  |
| 2    | 7.119     | 91967063 | 3804672 | 97.832 |

**(*S*<sub>a</sub>)-4-((3-(tert-butyl)-5-methyl-[1,1'-biphenyl]-2-yl)oxy)-3-(hydroxydiphenylmethyl)-6-iodoisoquinolin-1(2H)-one (3e)**

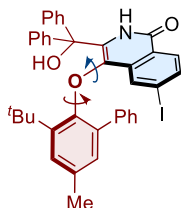

(PE:EA = 4:1) White solid. (60.2 mg, 87% yield, 97% ee). mp: 136–138 °C.

<sup>1</sup>H NMR (600 MHz, CDCl<sub>3</sub>) δ 7.84 (d, *J* = 8.4 Hz, 1H), 7.66 (dd, *J* = 8.4, 1.6 Hz, 1H), 7.42 – 7.37 (m, 4H), 7.35 – 7.27 (m, 4H), 7.27 – 7.24 (m, 3H), 7.24 – 7.20 (m, 2H), 7.06 (t, *J* = 7.3 Hz, 1H), 6.97 (s, 2H), 6.74 (s, 2H), 4.88 (s, 1H), 2.35 (s, 3H), 1.08 (s, 9H).

<sup>13</sup>C NMR (151 MHz, CDCl<sub>3</sub>) δ 159.1, 149.6, 145.5, 141.3, 139.7, 137.9, 135.4, 134.4, 133.2, 132.7, 132.5, 132.1, 131.7, 131.2, 130.3, 129.6, 129.3, 129.1, 128.8, 128.4, 128.2, 127.4, 127.0, 126.8, 124.3, 99.6, 81.3, 35.1, 30.1, 21.0.

HRMS (ESI): *m/z* [M+H]<sup>+</sup> calcd for [C<sub>39</sub>H<sub>35</sub>INO<sub>3</sub>]<sup>+</sup> required 692.1662, found 692.1654.

[α]<sub>D</sub><sup>25</sup> = -57.33 (c = 0.05, CH<sub>2</sub>Cl<sub>2</sub>).

**HPLC Condition:** The enantiomeric excess was determined by HPLC analysis on a Daicel Chiralcel IC, Hexanes/IPA = 80/20, 1.0 mL/min, λ = 254 nm, *t* (minor) = 5.681 min, *t* (major) = 7.516 min.

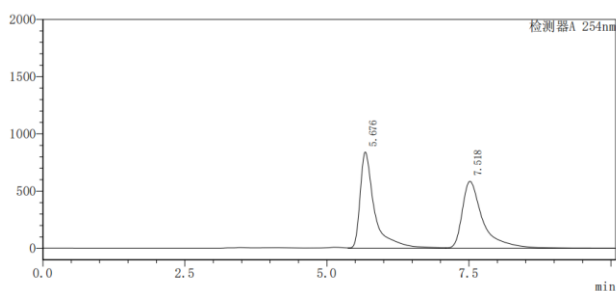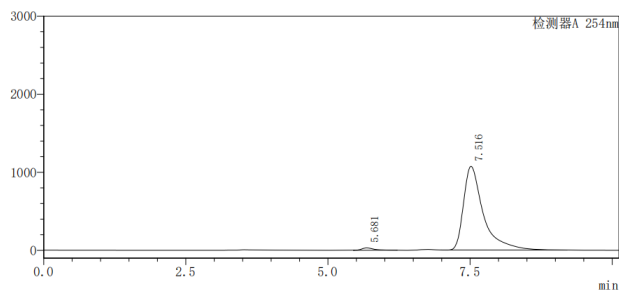

| Peak | Ret. Time | Area     | Height | Area%  |
|------|-----------|----------|--------|--------|
| 1    | 5.676     | 14978713 | 841146 | 50.299 |
| 2    | 7.518     | 14800371 | 585281 | 49.701 |

| Peak | Ret. Time | Area     | Height  | Area%  |
|------|-----------|----------|---------|--------|
| 1    | 5.681     | 440806   | 29768   | 1.669  |
| 2    | 7.516     | 25966813 | 1072073 | 98.331 |

**(*S<sub>a</sub>*)-4-((3-(tert-butyl)-5-methyl-[1,1'-biphenyl]-2-yl)oxy)-3-(hydroxydiphenylmethyl)-6-methylisoquinolin-1(2H)-one (3f)**

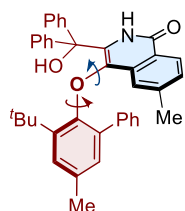

(PE:EA = 4:1) White solid. (55.1 mg, 95% yield, 97% ee). mp: 121–122 °C.

<sup>1</sup>H NMR (600 MHz, CDCl<sub>3</sub>) δ 8.07 (d, *J* = 8.2 Hz, 1H), 7.39 (d, *J* = 6.7 Hz, 3H), 7.32 – 7.15 (m, 10H), 7.05 (t, *J* = 7.5 Hz, 1H), 6.95 (s, 2H), 6.82 (s, 1H), 6.69 (s, 2H), 4.94 (d, *J* = 1.4 Hz, 1H), 2.33 (s, 3H), 2.20 (s, 3H), 1.09 (s, 9H).

<sup>13</sup>C NMR (151 MHz, CDCl<sub>3</sub>) δ 159.5, 150.0, 145.9, 142.2, 141.6, 139.7, 138.1, 133.9, 133.5, 132.7, 132.6, 132.1, 130.2, 130.1, 129.2, 129.0, 128.8, 128.3 (2C), 128.2, 128.1, 128.0, 127.5, 126.9, 126.6, 123.1, 122.2, 81.4, 35.1, 30.2, 22.2, 21.0.

HRMS (ESI): *m/z* [M+H]<sup>+</sup> calcd for [C<sub>40</sub>H<sub>38</sub>NO<sub>3</sub>]<sup>+</sup> required 580.2852, found 580.2848.

[α]<sub>D</sub><sup>25</sup> = -28.00 (c = 0.05, CH<sub>2</sub>Cl<sub>2</sub>).

**HPLC Condition:** The enantiomeric excess was determined by HPLC analysis on a Daicel Chiralcel IC, Hexanes/IPA = 80/20, 1.0 mL/min, λ = 254 nm, *t* (minor) = 7.113 min, *t* (major) = 11.175 min.

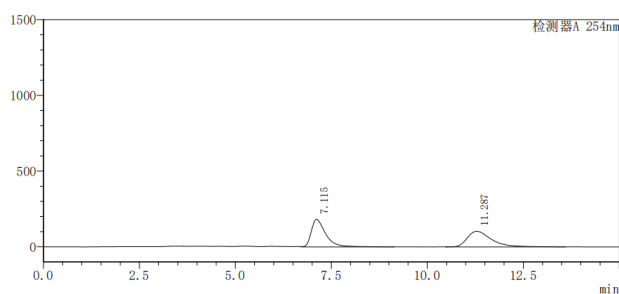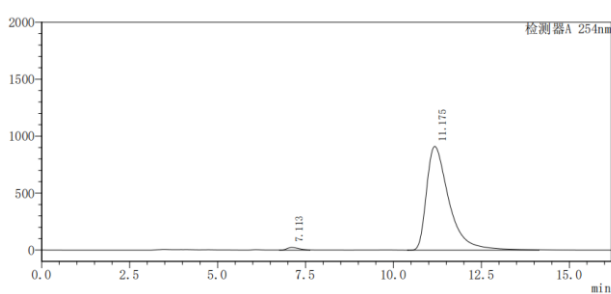

| Peak | Ret. Time | Area    | Height | Area%  |
|------|-----------|---------|--------|--------|
| 1    | 7.115     | 4797297 | 182793 | 51.027 |
| 2    | 11.287    | 4604176 | 104043 | 48.973 |

| Peak | Ret. Time | Area     | Height | Area%  |
|------|-----------|----------|--------|--------|
| 1    | 7.113     | 604083   | 24295  | 1.468  |
| 2    | 11.175    | 40548068 | 911026 | 98.532 |

**(*S*<sub>a</sub>)-6-(tert-butyl)-4-((3-(tert-butyl)-5-methyl-[1,1'-biphenyl]-2-yl)oxy)-3-(hydroxydiphenylmethyl)isoquinolin-1(2H)-one (3g)**

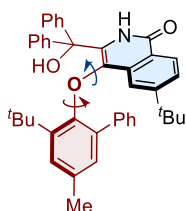

(PE:EA = 4:1) White solid. (50.4 mg, 87% yield, 99% ee). mp: 118–119 °C.

<sup>1</sup>H NMR (600 MHz, CDCl<sub>3</sub>) δ 8.11 (d, *J* = 8.5 Hz, 1H), 7.44 (d, *J* = 8.5 Hz, 1H), 7.39 (t, *J* = 7.0 Hz, 3H), 7.30 (d, *J* = 6.0 Hz, 3H), 7.25 (d, *J* = 5.6 Hz, 5H), 7.19 (s, 1H), 7.06 (d, *J* = 11.1 Hz, 2H), 6.97 (s, 2H), 6.71 (s, 2H), 5.05 (s, 1H), 2.31 (s, 3H), 1.09 (s, 9H), 1.08 (s, 9H).

<sup>13</sup>C NMR (151 MHz, CDCl<sub>3</sub>) δ 159.4, 155.0, 150.1, 146.0, 141.6, 139.9, 137.9, 134.2, 133.0, 132.9, 132.8, 132.0, 130.1, 129.7, 129.2, 129.0, 128.9, 128.3, 128.2, 128.1, 127.5, 127.0, 126.7, 124.5, 123.0, 119.2, 81.4, 35.3, 35.1, 30.9, 30.2, 20.9.

HRMS (ESI): *m/z* [M+H]<sup>+</sup> calcd for [C<sub>43</sub>H<sub>44</sub>NO<sub>3</sub>]<sup>+</sup> required 622.3321, found 622.3319.

[α]<sub>D</sub><sup>25</sup> = -30.00 (*c* = 0.05, CH<sub>2</sub>Cl<sub>2</sub>).

**HPLC Condition:** The enantiomeric excess was determined by HPLC analysis on a Daicel Chiralcel IC, Hexanes/IPA = 80/20, 1.0 mL/min, λ = 254 nm, *t* (minor) = 6.565 min, *t* (major) = 8.081 min.

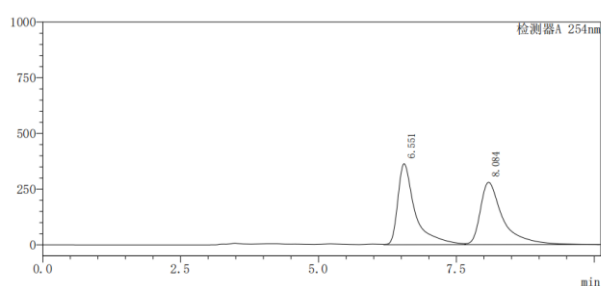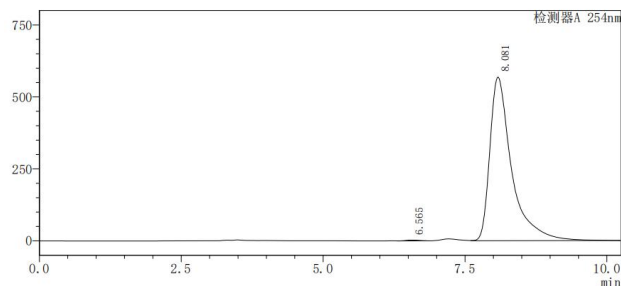

| Peak | Ret. Time | Area    | Height | Area%  |
|------|-----------|---------|--------|--------|
| 1    | 6.551     | 7971529 | 364122 | 49.976 |
| 2    | 8.084     | 7979234 | 280288 | 50.024 |

| Peak | Ret. Time | Area     | Height | Area%  |
|------|-----------|----------|--------|--------|
| 1    | 6.565     | 46149    | 2893   | 0.302  |
| 2    | 8.081     | 15211221 | 568388 | 99.698 |

**(*S*<sub>a</sub>)-4-((3-(tert-butyl)-5-methyl-[1,1'-biphenyl]-2-yl)oxy)-3-(hydroxydiphenylmethyl)-6-phenylisoquinolin-1(2H)-one (3h)**

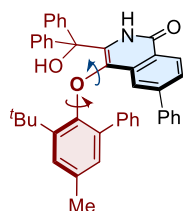

(PE:EA = 3:1) White solid. (59.7 mg, 93% yield, 96% ee). mp: 133–135 °C.

<sup>1</sup>H NMR (600 MHz, CDCl<sub>3</sub>) δ 8.24 (d, *J* = 8.3 Hz, 1H), 7.64 (dd, *J* = 8.4, 1.7 Hz, 1H), 7.43 – 7.38 (m, 3H), 7.37 – 7.32 (m, 3H), 7.32 – 7.25 (m, 10H), 7.21 – 7.16 (m, 2H), 7.08 (tt, *J* = 7.4, 1.3 Hz, 1H), 6.99 (s, 2H), 6.79 (d, *J* = 2.2 Hz, 2H), 5.05 (s, 1H), 2.39 (s, 3H), 1.06 (s, 9H).

<sup>13</sup>C NMR (151 MHz, CDCl<sub>3</sub>) δ 159.3, 150.2, 145.8, 143.8, 141.5, 140.2, 139.7, 137.9, 134.1, 133.3, 133.1, 133.0, 132.0, 130.2, 130.1, 129.2, 129.0, 128.9 (2C), 128.8, 128.3, 128.2, 128.1, 127.5, 127.2, 127.0, 126.8, 125.4, 124.1, 120.5, 81.3, 35.1, 30.1, 20.9.

HRMS (ESI): *m/z* [M+K]<sup>+</sup> calcd for [C<sub>45</sub>H<sub>39</sub>KNO<sub>3</sub>]<sup>+</sup> required 680.2567, found 680.2565.

[α]<sub>D</sub><sup>25</sup> = -35.33 (c = 0.05, CH<sub>2</sub>Cl<sub>2</sub>).

**HPLC Condition:** The enantiomeric excess was determined by HPLC analysis on a Daicel Chiralcel IC, Hexanes/IPA = 80/20, 1.0 mL/min, λ = 254 nm, *t* (minor) = 7.636 min, *t* (major) = 10.873 min.

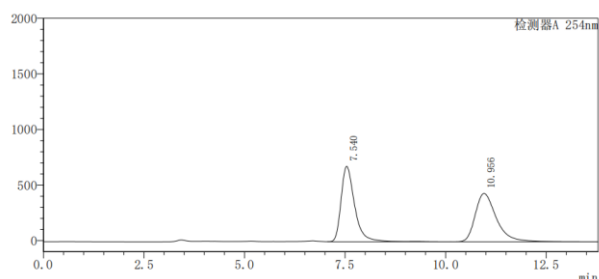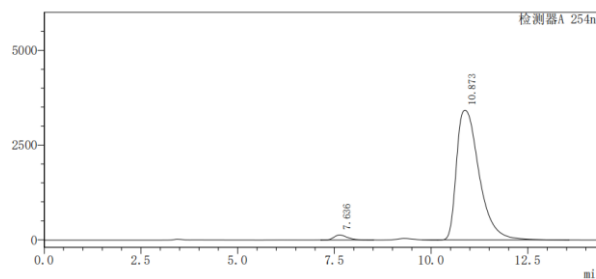

| Peak | Ret. Time | Area     | Height | Area%  |
|------|-----------|----------|--------|--------|
| 1    | 7.540     | 15974506 | 678291 | 50.262 |
| 2    | 10.956    | 15807670 | 434301 | 49.738 |

| Peak | Ret. Time | Area      | Height  | Area%  |
|------|-----------|-----------|---------|--------|
| 1    | 7.636     | 3224910   | 134138  | 2.271  |
| 2    | 10.873    | 138799516 | 3421034 | 97.729 |

**(*S*<sub>a</sub>)-4-((3-(tert-butyl)-5-methyl-[1,1'-biphenyl]-2-yl)oxy)-3-(hydroxydiphenylmethyl)-6-methoxyisoquinolin-1(2H)-one (3i)**

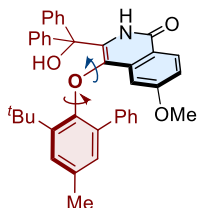

(PE:EA = 4:1) White solid. (53.1 mg, 89% yield, 99% ee). mp: 114–115 °C.

<sup>1</sup>H NMR (600 MHz, CDCl<sub>3</sub>) δ 8.09 (d, *J* = 8.9 Hz, 1H), 7.38 (t, *J* = 4.7 Hz, 3H), 7.30 (d, *J* = 6.7 Hz, 3H), 7.24 (d, *J* = 8.5 Hz, 5H), 7.13 (s, 1H), 7.09 (t, *J* = 7.2 Hz, 1H), 7.00 (s, 2H), 6.94 (d, *J* = 8.7 Hz, 1H), 6.73 (s, 2H), 6.41 (s, 1H), 4.95 (s, 1H), 3.38 (s, 3H), 2.31 (s, 3H), 1.09 (s, 9H).

<sup>13</sup>C NMR (151 MHz, CDCl<sub>3</sub>) δ 162.2, 159.2, 149.9, 145.9, 141.4, 139.8, 137.9, 135.1, 133.8, 133.2, 132.8, 132.0, 130.8, 130.2, 129.2, 129.0, 128.8, 128.3, 128.2, 127.9, 127.4, 127.1, 126.8, 119.1, 116.8, 103.4, 81.3, 55.0, 35.1, 30.3, 20.9.

HRMS (ESI): *m/z* [M+Na]<sup>+</sup> calcd for [C<sub>40</sub>H<sub>37</sub>NNaO<sub>4</sub>]<sup>+</sup> required 618.2620, found 618.2580.

[α]<sub>D</sub><sup>25</sup> = -2.67 (c = 0.5, CH<sub>2</sub>Cl<sub>2</sub>).

**HPLC Condition:** The enantiomeric excess was determined by HPLC analysis on a Daicel Chiralcel IC, Hexanes/IPA = 80/20, 1.0 mL/min, λ = 254 nm, *t* (minor) = 8.578 min, *t* (major) = 13.543 min.

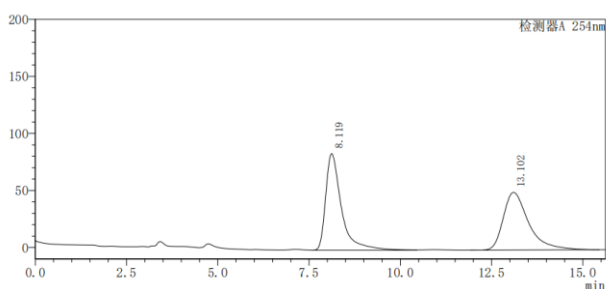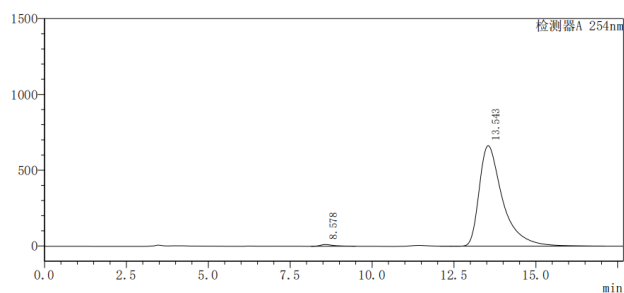

| Peak | Ret. Time | Area    | Height | Area%  |
|------|-----------|---------|--------|--------|
| 1    | 8.119     | 2554769 | 84744  | 51.062 |
| 2    | 13.102    | 2448467 | 50611  | 48.938 |

| Peak | Ret. Time | Area     | Height | Area%  |
|------|-----------|----------|--------|--------|
| 1    | 8.578     | 311808   | 11055  | 0.938  |
| 2    | 13.543    | 32938300 | 662872 | 99.062 |

**(*S*<sub>a</sub>)-4-((3-(tert-butyl)-5-methyl-[1,1'-biphenyl]-2-yl)oxy)-3-(hydroxydiphenylmethyl)-6-(trifluoromethoxy)isoquinolin-1(2H)-one (3j)**

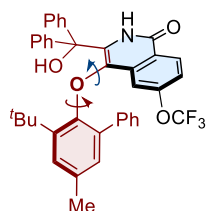

(PE:EA = 4:1) White solid. (56.7 mg, 88% yield, 96% ee). mp: 115–116 °C.

<sup>1</sup>H NMR (600 MHz, CDCl<sub>3</sub>) δ 8.20 (d, *J* = 8.7 Hz, 1H), 7.42 (d, *J* = 7.5 Hz, 3H), 7.35 – 7.20 (m, 10H), 7.16 (d, *J* = 8.8 Hz, 1H), 7.09 – 7.04 (m, 1H), 6.97 (s, 2H), 6.86 (s, 1H), 6.73 (d, *J* = 2.4 Hz, 1H), 4.89 (s, 1H), 2.33 (s, 3H), 1.06 (s, 9H).

<sup>13</sup>C NMR (151 MHz, CDCl<sub>3</sub>) δ 158.6, 151.8, 149.3, 145.5, 141.3, 139.7, 137.9, 134.9, 133.40, 133.4 (2C), 132.3, 131.7, 130.9, 130.2, 129.4, 129.2, 128.8, 128.5, 128.4, 127.4, 127.1, 126.8, 123.4, 121.1, 119.4, 112.7, 81.4, 35.1, 30.1, 29.8, 20.9.

<sup>19</sup>F NMR (565 MHz, CDCl<sub>3</sub>) δ -57.69.

HRMS (ESI): *m/z* [M+H]<sup>+</sup> calcd for [C<sub>40</sub>H<sub>35</sub>F<sub>3</sub>NO<sub>4</sub>]<sup>+</sup> required 650.2518, found 650.2526.

[α]<sub>D</sub><sup>25</sup> = -4.67 (c = 0.05, CH<sub>2</sub>Cl<sub>2</sub>).

**HPLC Condition:** The enantiomeric excess was determined by HPLC analysis on a Daicel Chiralcel IC, Hexanes/IPA = 90/10, 1.0 mL/min, λ = 254 nm, *t* (minor) = 7.776 min, *t* (major) = 11.152 min.

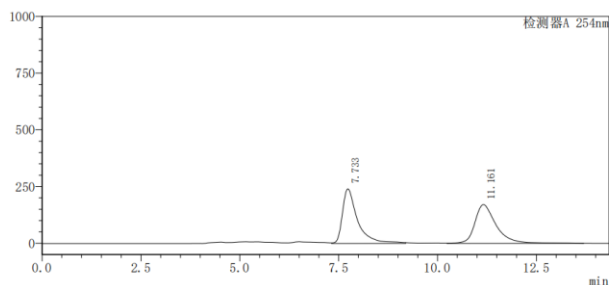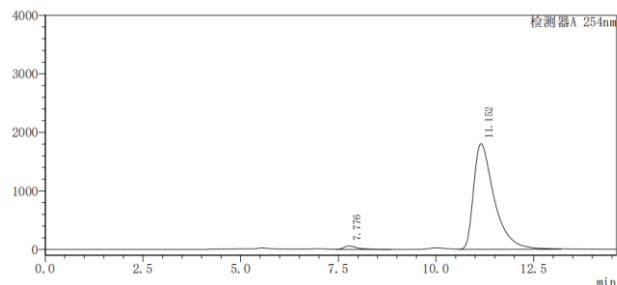

| Peak | Ret. Time | Area    | Height | Area%  |
|------|-----------|---------|--------|--------|
| 1    | 7.733     | 6398240 | 240860 | 49.916 |
| 2    | 11.161    | 6419731 | 170806 | 50.084 |

| Peak | Ret. Time | Area     | Height  | Area%  |
|------|-----------|----------|---------|--------|
| 1    | 7.776     | 1518630  | 59489   | 2.227  |
| 2    | 11.152    | 66678981 | 1806209 | 97.773 |

**(*S*<sub>a</sub>)-4-((3-(tert-butyl)-5-methyl-[1,1'-biphenyl]-2-yl)oxy)-3-(hydroxydiphenylmethyl)-1-oxo-1,2-dihydroisoquinoline-6-carbonitrile (3k)**

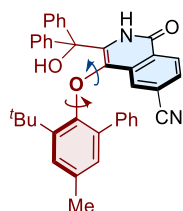

(PE:EA = 3:1) Yellow solid. (47.9 mg, 81% yield, 94% ee). mp: 124–125 °C.

<sup>1</sup>H NMR (600 MHz, CDCl<sub>3</sub>) δ 8.23 (d, *J* = 8.3 Hz, 1H), 7.56 (d, *J* = 8.3 Hz, 1H), 7.42 (d, *J* = 6.5 Hz, 4H), 7.35 (s, 1H), 7.34 – 7.26 (m, 6H), 7.22 (d, *J* = 7.3 Hz, 2H), 7.03 (t, *J* = 7.3 Hz, 1H), 6.92 (s, 2H), 6.71 (s, 2H), 4.78 (s, 1H), 2.34 (s, 3H), 1.09 (s, 9H).

<sup>13</sup>C NMR (151 MHz, CDCl<sub>3</sub>) δ 158.3, 149.4, 145.1, 141.0, 139.5, 137.9, 133.6, 133.5, 132.8, 132.4, 132.2, 131.8, 130.2, 129.5, 129.4, 129.2, 128.8, 128.6, 128.5, 128.4, 127.5, 127.3, 127.0, 126.8, 126.7, 118.0, 115.4, 81.3, 35.1, 30.1, 21.0.

HRMS (ESI): *m/z* [M+H]<sup>+</sup> calcd for [C<sub>40</sub>H<sub>35</sub>N<sub>2</sub>O<sub>3</sub>]<sup>+</sup> required 591.2648, found 591.2643.

[α]<sub>D</sub><sup>25</sup> = -26.00 (c = 0.05, CH<sub>2</sub>Cl<sub>2</sub>).

**HPLC Condition:** The enantiomeric excess was determined by HPLC analysis on a Daicel Chiralcel IC, Hexanes/IPA = 90/10, 0.8 mL/min, λ = 254 nm, *t* (minor) = 29.519 min, *t* (major) = 23.183 min.

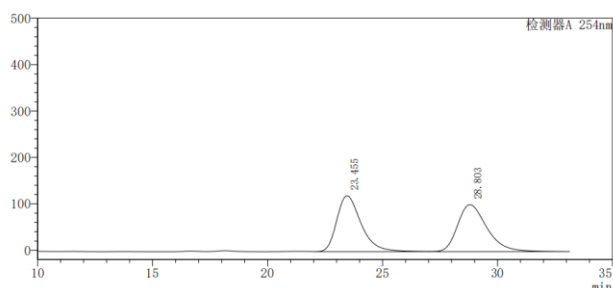

| Peak | Ret. Time | Area    | Height | Area%  |
|------|-----------|---------|--------|--------|
| 1    | 23.455    | 8880204 | 120546 | 49.726 |
| 2    | 28.803    | 8978016 | 101276 | 50.274 |

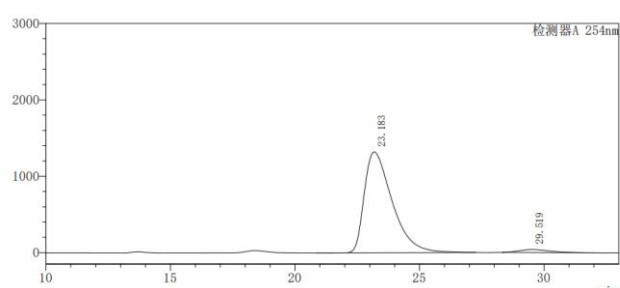

| Peak | Ret. Time | Area      | Height  | Area%  |
|------|-----------|-----------|---------|--------|
| 1    | 23.183    | 102436673 | 1318541 | 96.901 |
| 2    | 29.519    | 3275968   | 38528   | 3.099  |

**(S<sub>a</sub>)-6-(anthracen-9-yl)-4-((3-(tert-butyl)-5-methyl-[1,1'-biphenyl]-2-yl)oxy)-3-(hydroxydiphenylmethyl)isoquinolin-1(2H)-one (3l)**

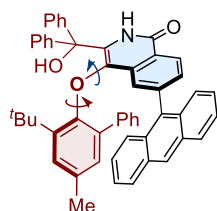

(PE:EA = 2:1) White solid. (40.1 mg, 54% yield, 65% ee). mp: 172–173 °C.

<sup>1</sup>H NMR (600 MHz, CDCl<sub>3</sub>) δ 8.42 (d, *J* = 12.5 Hz, 2H), 8.06 – 7.92 (m, 2H), 7.58 (d, *J* = 8.8 Hz, 1H), 7.47 – 7.37 (m, 9H), 7.32 (s, 5H), 7.27 (q, *J* = 8.1 Hz, 3H), 7.23 – 7.18 (m, 1H), 7.16 (d, *J* = 6.8 Hz, 2H), 7.10 (s, 1H), 7.02 (s, 1H), 6.70 (s, 1H), 6.58 (s, 1H), 4.91 (s, 1H), 1.83 (s, 3H), 0.84 (s, 9H).

<sup>13</sup>C NMR (151 MHz, CDCl<sub>3</sub>) δ 159.5, 149.9, 145.8, 142.8, 141.5, 139.5, 138.2, 135.5, 134.2, 133.5, 132.7, 132.2, 132.1, 131.3, 131.2, 130.8, 130.6, 130.5, 129.7, 129.6, 129.2, 129.1, 128.9, 128.6, 128.4, 128.3, 127.9, 127.4, 127.3, 127.1, 127.0, 126.3, 126.2, 125.7, 125.6, 125.3, 125.2, 125.1, 124.6, 81.5, 34.8, 29.9, 20.5.

HRMS (ESI): *m/z* [M+H]<sup>+</sup> calcd for [C<sub>53</sub>H<sub>44</sub>NO<sub>3</sub>]<sup>+</sup> required 742.3321, found 742.3315

[α]<sub>D</sub><sup>25</sup> = -14.00 (c = 0.05, CH<sub>2</sub>Cl<sub>2</sub>).

**HPLC Condition:** The enantiomeric excess was determined by HPLC analysis on a Daicel Chiralcel IC, Hexanes/IPA = 80/20, 1.0 mL/min, λ = 254 nm, *t* (minor) = 10.167 min, *t* (major) = 8.503 min.

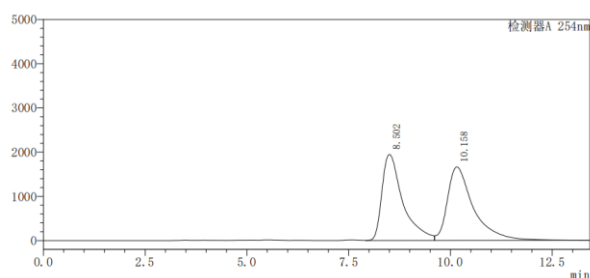

| Peak | Ret. Time | Area     | Height  | Area%  |
|------|-----------|----------|---------|--------|
| 1    | 8.502     | 69141485 | 1945892 | 48.343 |
| 2    | 10.158    | 73880330 | 1660927 | 51.657 |

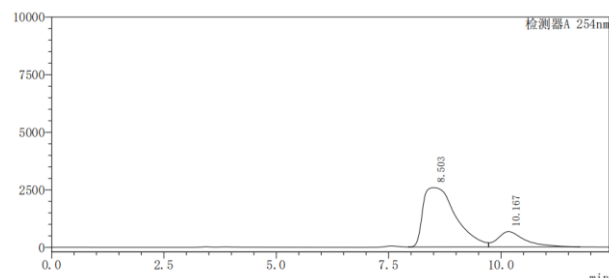

| Peak | Ret. Time | Area      | Height  | Area%  |
|------|-----------|-----------|---------|--------|
| 1    | 8.503     | 130718382 | 2576678 | 82.374 |
| 2    | 10.167    | 127969992 | 664297  | 17.626 |

**(*S*<sub>a</sub>)-4-((3-(tert-butyl)-5-methyl-[1,1'-biphenyl]-2-yl)oxy)-6-(9H-carbazol-9-yl)-3-(hydroxydiphenylmethyl)isoquinolin-1(2H)-one (3m)**

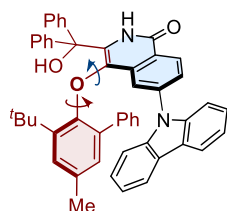

(PE:EA = 2:1) Yellow solid. (62.2 mg, 85% yield, 85% ee). mp: 168–170 °C.

<sup>1</sup>H NMR (600 MHz, CDCl<sub>3</sub>) δ 8.36 (d, *J* = 8.5 Hz, 1H), 8.14 – 8.07 (m, 2H), 7.65 (d, *J* = 8.3 Hz, 1H), 7.55 (s, 1H), 7.46 (dd, *J* = 11.1, 6.9 Hz, 3H), 7.37 (s, 3H), 7.34 – 7.29 (m, 9H), 7.20 (d, *J* = 7.5 Hz, 2H), 7.12 (d, *J* = 10.1 Hz, 2H), 7.01 (s, 3H), 6.82 (s, 1H), 4.81 (s, 1H), 2.33 (s, 3H), 1.00 (s, 9H).

<sup>13</sup>C NMR (151 MHz, CDCl<sub>3</sub>) δ 159.1, 149.7, 145.6, 141.6, 141.4, 140.1, 139.5, 138.3, 135.2, 133.7, 132.8, 132.5, 131.7, 131.5, 130.3, 129.4, 129.2, 128.8, 128.7, 128.5, 127.5, 126.9, 126.6, 126.3, 124.7, 124.2, 120.8, 120.4, 118.8, 110.0, 81.3, 35.1, 30.1, 21.1.

HRMS (ESI): *m/z* [M+K]<sup>+</sup> calcd for [C<sub>51</sub>H<sub>42</sub>KN<sub>2</sub>O<sub>3</sub>]<sup>+</sup> required 769.2833, found 769.2824.

[α]<sub>D</sub><sup>25</sup> = +36.67 (c = 0.05, CH<sub>2</sub>Cl<sub>2</sub>).

**HPLC Condition:** The enantiomeric excess was determined by HPLC analysis on a Daicel Chiralcel IC, Hexanes/IPA = 80/20, 1.0 mL/min, λ = 254 nm, *t* (minor) = 7.688 min, *t* (major) = 5.084 min.

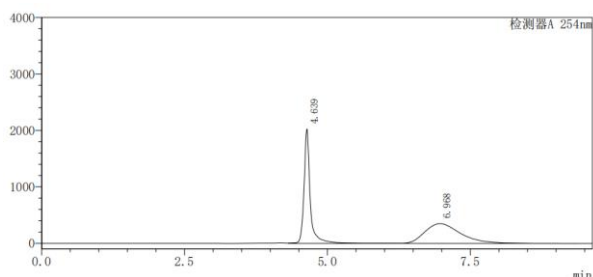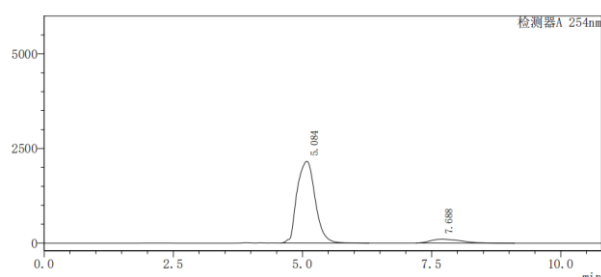

| Peak | Ret. Time | Area     | Height  | Area%  |
|------|-----------|----------|---------|--------|
| 1    | 4.639     | 15365351 | 2025507 | 50.088 |
| 2    | 6.968     | 15311411 | 350682  | 49.912 |

| Peak | Ret. Time | Area     | Height  | Area%  |
|------|-----------|----------|---------|--------|
| 1    | 5.084     | 52727058 | 2162021 | 92.553 |
| 2    | 7.688     | 4242431  | 105133  | 7.447  |

**(*S*<sub>a</sub>)-4-((3-(tert-butyl)-5-methyl-[1,1'-biphenyl]-2-yl)oxy)-3-(hydroxydiphenylmethyl)-7-methylisoquinolin-1(2H)-one (3n)**

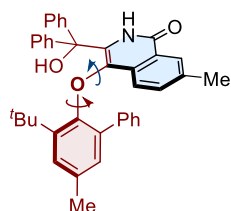

(PE:EA = 4:1) White solid. (49.3 mg, 85% yield, 96% ee). mp: 118–120 °C.

<sup>1</sup>H NMR (600 MHz, CDCl<sub>3</sub>) δ 8.01 (s, 1H), 7.39 (d, *J* = 7.3 Hz, 3H), 7.31 – 7.19 (m, 10H), 7.06 (t, *J* = 7.3 Hz, 1H), 6.95 (t, *J* = 7.9 Hz, 3H), 6.70 (s, 2H), 4.94 (s, 1H), 2.42 (s, 3H), 2.32 (s, 3H), 1.07 (s, 9H).

<sup>13</sup>C NMR (151 MHz, CDCl<sub>3</sub>) δ 159.5, 150.0, 146.0, 141.6, 139.7, 138.0, 137.0, 134.3, 133.3, 132.7, 132.6, 132.1, 131.1, 130.2, 129.2, 129.0, 128.9, 128.8, 128.3, 128.2, 128.1, 127.9, 127.5, 126.9, 126.6, 125.3, 122.2, 81.3, 35.1, 30.2, 21.3, 21.0.

HRMS (ESI): *m/z* [M+H]<sup>+</sup> calcd for [C<sub>40</sub>H<sub>38</sub>NO<sub>3</sub>]<sup>+</sup> required 580.2852, found 580.2849.

[α]<sub>D</sub><sup>25</sup> = -20.00 (c = 0.05, CH<sub>2</sub>Cl<sub>2</sub>).

**HPLC Condition:** The enantiomeric excess was determined by HPLC analysis on a Daicel Chiralcel IC, Hexanes/IPA = 80/20, 1.0 mL/min, λ = 254 nm, *t* (minor) = 5.870 min, *t* (major) = 9.357 min.

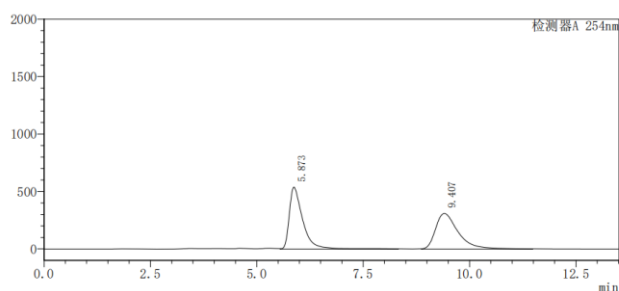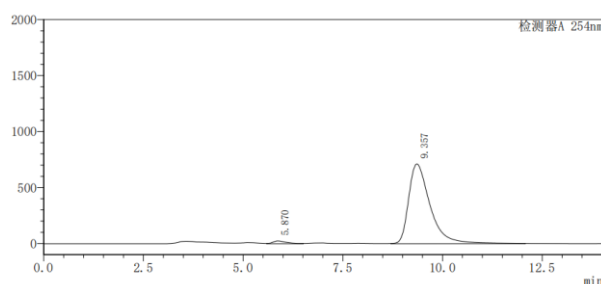

| Peak | Ret. Time | Area     | Height | Area%  |
|------|-----------|----------|--------|--------|
| 1    | 5.873     | 12053137 | 539999 | 50.996 |
| 2    | 9.407     | 11582321 | 310636 | 49.004 |

| Peak | Ret. Time | Area     | Height | Area%  |
|------|-----------|----------|--------|--------|
| 1    | 5.870     | 582557   | 24949  | 2.135  |
| 2    | 9.357     | 26706259 | 712500 | 97.865 |

**(*S*<sub>a</sub>)-4-((3-(tert-butyl)-5-methyl-[1,1'-biphenyl]-2-yl)oxy)-3-(hydroxydiphenylmethyl)-8-methylisoquinolin-1(2H)-one (3o)**

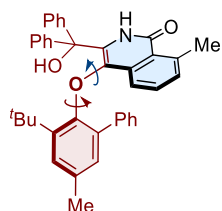

(PE:EA = 4:1) White solid. (20.3 mg, 35% yield, 95% ee). mp: 121–122 °C.

<sup>1</sup>H NMR (600 MHz, CDCl<sub>3</sub>) δ 7.40 (t, *J* = 8.8 Hz, 3H), 7.33 – 7.18 (m, 10H), 7.12 (d, *J* = 7.3 Hz, 1H), 7.09 (s, 1H), 7.01 (d, *J* = 8.0 Hz, 2H), 6.88 (s, 2H), 6.66 (s, 1H), 4.82 (s, 1H), 2.74 (s, 3H), 2.30 (s, 3H), 1.10 (s, 9H).

<sup>13</sup>C NMR (151 MHz, CDCl<sub>3</sub>) δ 160.6, 149.9, 145.8, 142.6, 141.6, 139.2, 138.2, 135.1, 133.7, 132.4, 132.0, 131.8, 131.0, 130.1, 129.7, 129.1, 129.0, 128.7, 128.4, 128.3, 128.2, 127.6, 126.5, 126.2, 123.4, 120.1, 81.1, 35.2, 30.2, 23.6, 20.9.

HRMS (ESI): *m/z* [M+H]<sup>+</sup> calcd for [C<sub>40</sub>H<sub>38</sub>NO<sub>3</sub>]<sup>+</sup> required 580.2852, found 580.2849.

[α]<sub>D</sub><sup>25</sup> = -2.00 (c = 0.05, CH<sub>2</sub>Cl<sub>2</sub>).

**HPLC Condition:** The enantiomeric excess was determined by HPLC analysis on a Daicel Chiralcel IC, Hexanes/IPA = 80/20, 1.0 mL/min, λ = 254 nm, *t* (minor) = 5.020 min, *t* (major) = 6.020 min.

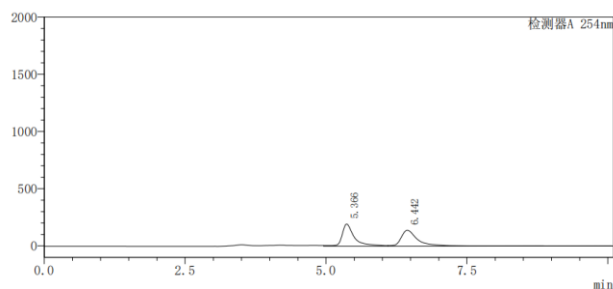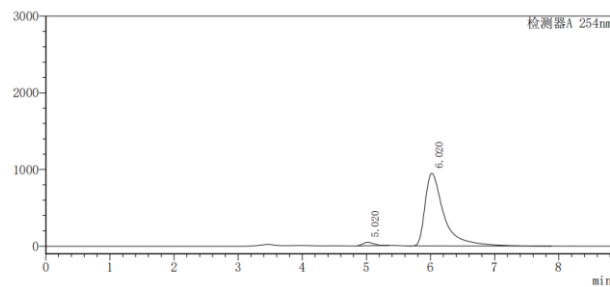

| Peak | Ret. Time | Area    | Height | Area%  |
|------|-----------|---------|--------|--------|
| 1    | 5.366     | 2980705 | 194067 | 49.519 |
| 2    | 6.442     | 3038663 | 138737 | 50.481 |

| Peak | Ret. Time | Area     | Height | Area%  |
|------|-----------|----------|--------|--------|
| 1    | 5.020     | 517785   | 43770  | 2.603  |
| 2    | 6.020     | 19370528 | 946801 | 97.397 |

**(*S*<sub>a</sub>)-4-((3-(tert-butyl)-5-methyl-[1,1'-biphenyl]-2-yl)oxy)-3-(hydroxydiphenylmethyl)benzo[*h*]isoquinolin-1(2*H*)-one (3p)**

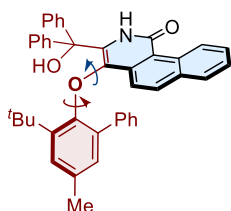

(PE:EA = 1:1) Yellow solid. (11.1 mg, 18% yield, 95% ee). mp: 130–131 °C.

<sup>1</sup>H NMR (600 MHz, CDCl<sub>3</sub>) δ 9.94 (d, *J* = 8.7 Hz, 1H), 7.80 (dd, *J* = 18.5, 8.5 Hz, 2H), 7.69 (t, *J* = 7.8 Hz, 1H), 7.59 (t, *J* = 7.4 Hz, 2H), 7.44 (t, *J* = 8.2 Hz, 3H), 7.35 (d, *J* = 7.4 Hz, 2H), 7.32 – 7.25 (m, 6H), 7.21 (d, *J* = 7.5 Hz, 2H), 6.93 (t, *J* = 7.4 Hz, 1H), 6.67 (s, 3H), 4.83 (s, 1H), 2.32 (s, 3H), 1.14 (s, 9H).

<sup>13</sup>C NMR (151 MHz, CDCl<sub>3</sub>) δ 160.0, 150.3, 145.7, 141.4, 139.2, 138.1, 135.2, 134.3, 133.2, 132.6, 132.3, 132.0, 131.9, 131.8, 131.7, 129.3, 129.2, 128.8, 128.6, 128.4, 128.3, 128.0, 127.6, 127.4, 126.9, 126.7, 126.4, 119.4, 118.8, 81.3, 35.2, 30.2, 21.0.

HRMS (ESI): *m/z* [M+K]<sup>+</sup> calcd for [C<sub>43</sub>H<sub>37</sub>KNO<sub>3</sub>]<sup>+</sup> required 654.2411, found 654.2421.

[α]<sub>D</sub><sup>25</sup> = -30.67 (c = 0.05, CH<sub>2</sub>Cl<sub>2</sub>).

**HPLC Condition:** The enantiomeric excess was determined by HPLC analysis on a Daicel Chiralcel IC, Hexanes/IPA = 80/20, 1.0 mL/min, λ = 254 nm, *t* (minor) = 5.123 min, *t* (major) = 9.393 min.

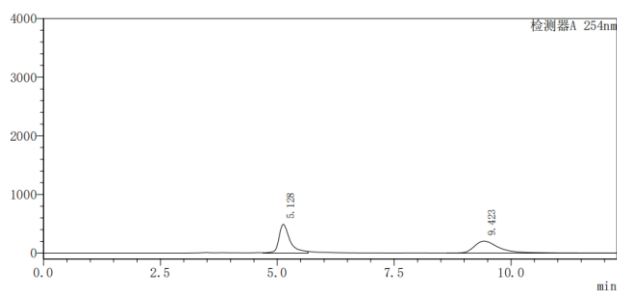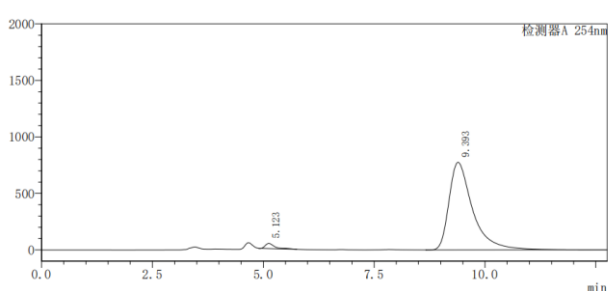

| Peak | Ret. Time | Area    | Height | Area%  |
|------|-----------|---------|--------|--------|
| 1    | 5.128     | 8206904 | 491950 | 51.774 |
| 2    | 9.423     | 7644497 | 206201 | 48.226 |

| Peak | Ret. Time | Area     | Height | Area%  |
|------|-----------|----------|--------|--------|
| 1    | 5.123     | 685230   | 45853  | 2.324  |
| 2    | 9.393     | 28799276 | 775248 | 97.676 |

**(*S*<sub>a</sub>)-7-((3-(tert-butyl)-5-methyl-[1,1'-biphenyl]-2-yl)oxy)-8-(hydroxydiphenylmethyl)phenaleno[1,9-*gh*]isoquinolin-10(9H)-one (3q)**

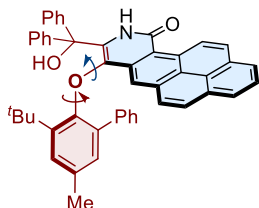

(PE:EA = 3:1) Yellow solid. (49.0 mg, 71% yield, 94% ee). mp: 179–180 °C.

<sup>1</sup>H NMR (600 MHz, CDCl<sub>3</sub>) δ 10.33 (d, *J* = 9.5 Hz, 1H), 8.34 (d, *J* = 9.5 Hz, 1H), 8.30 (d, *J* = 7.7 Hz, 1H), 8.16 (d, *J* = 7.4 Hz, 1H), 8.04 – 8.01 (m, 2H), 7.95 (s, 1H), 7.62 (d, *J* = 9.0 Hz, 1H), 7.55 (s, 1H), 7.48 – 7.44 (m, 3H), 7.41 (d, *J* = 7.3 Hz, 2H), 7.32 – 7.17 (m, 7H), 6.90 (t, *J* = 7.4 Hz, 1H), 6.60 (s, 3H), 4.97 (s, 1H), 2.33 (s, 3H), 1.25 (s, 9H).

<sup>13</sup>C NMR (151 MHz, CDCl<sub>3</sub>) δ 161.0, 150.3, 145.9, 141.6, 139.3, 138.2, 133.9, 133.8, 132.8, 132.5, 132.2, 132.1, 132.0, 131.0, 130.7, 130.6, 130.5, 129.7, 129.3, 128.8, 128.4, 128.3, 128.2, 127.7, 127.6, 126.7, 126.5, 126.4, 126.3, 126.2, 123.8, 123.2, 118.3, 116.3, 81.3, 35.3, 30.4, 21.0.

HRMS (ESI): *m/z* [M+H]<sup>+</sup> calcd for [C<sub>49</sub>H<sub>40</sub>NO<sub>3</sub>]<sup>+</sup> required 690.3008, found 690.3009.

[α]<sub>D</sub><sup>25</sup> = -150 (c = 0.05, CH<sub>2</sub>Cl<sub>2</sub>).

**HPLC Condition:** The enantiomeric excess was determined by HPLC analysis on a Daicel Chiralcel IC, Hexanes/IPA = 90/10, 0.8 mL/min, λ = 254 nm, *t* (minor) = 12.172 min, *t* (major) = 17.032 min.

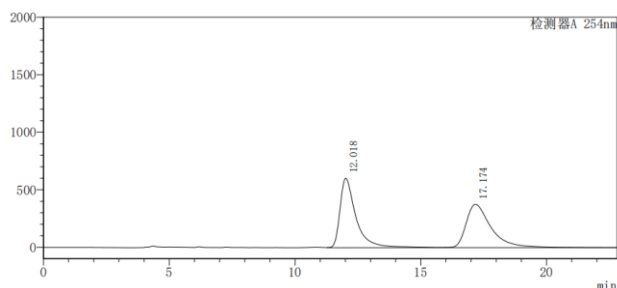

| Peak | Ret. Time | Area     | Height | Area%  |
|------|-----------|----------|--------|--------|
| 1    | 12.018    | 26579820 | 602962 | 50.627 |
| 2    | 17.174    | 25921933 | 376385 | 49.373 |

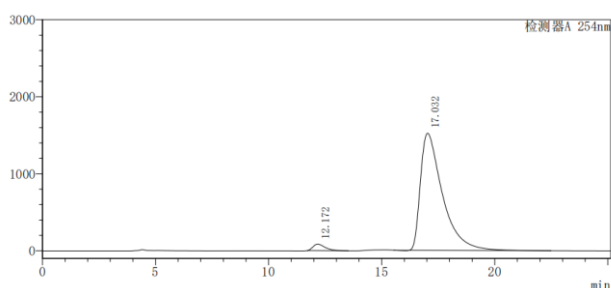

| Peak | Ret. Time | Area      | Height  | Area%  |
|------|-----------|-----------|---------|--------|
| 1    | 12.172    | 3207087   | 85867   | 3.013  |
| 2    | 17.032    | 103235342 | 1520813 | 96.987 |

**(*S*<sub>a</sub>)-4-((3-(tert-butyl)-4'-fluoro-5-methyl-[1,1'-biphenyl]-2-yl)oxy)-3-(hydroxydiphenylmethyl)isoquinolin-1(2H)-one (3r)**

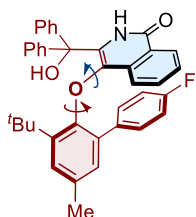

(PE:EA = 4:1) White solid. (54.9 mg, 94% yield, 96% ee). mp: 119–120 °C.

<sup>1</sup>H NMR (600 MHz, CDCl<sub>3</sub>) δ 8.23 (d, *J* = 7.5 Hz, 1H), 7.43 – 7.36 (m, 5H), 7.31 (t, *J* = 6.9 Hz, 4H), 7.24 (s, 5H), 7.05 (d, *J* = 8.4 Hz, 1H), 6.64 (s, 4H), 4.86 (s, 1H), 2.32 (s, 3H), 1.07 (s, 9H).

<sup>13</sup>C NMR (151 MHz, CDCl<sub>3</sub>) δ 162.6 (d, <sup>1</sup>*J*<sub>C-F</sub> = 247.5 Hz), 159.5, 150.0, 145.6, 141.4, 139.8, 134.0, 133.9, 133.8, 133.3, 132.8, 132.3, 131.9, 131.5, 130.1, 129.4, 129.2, 128.7, 128.5, 128.4 (2C), 128.3, 127.5, 126.8, 125.4, 122.1, 113.6 (d, <sup>2</sup>*J*<sub>C-F</sub> = 21.4 Hz), 81.4, 35.1, 30.2, 21.0.

<sup>19</sup>F NMR (565 MHz, CDCl<sub>3</sub>) δ -114.74.

HRMS (ESI): *m/z* [M+H]<sup>+</sup> calcd for [C<sub>39</sub>H<sub>35</sub>FNO<sub>3</sub>]<sup>+</sup> required 584.2601, found 584.2588.

[α]<sub>D</sub><sup>25</sup> = -11.33 (c = 0.05, CH<sub>2</sub>Cl<sub>2</sub>).

**HPLC Condition:** The enantiomeric excess was determined by HPLC analysis on a Daicel Chiralcel IC, Hexanes/IPA = 80/20, 1.0 mL/min, λ = 254 nm, *t* (minor) = 6.208 min, *t* (major) = 8.256 min.

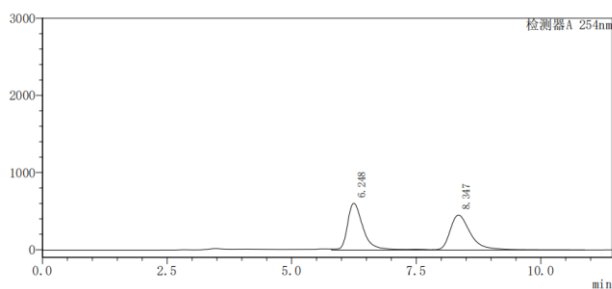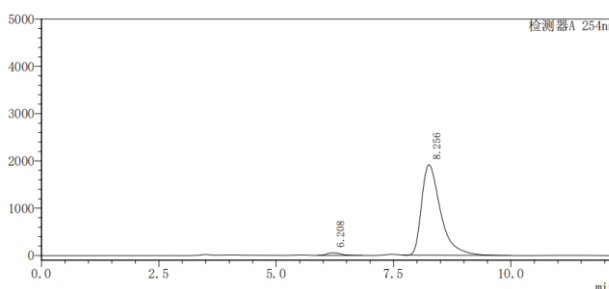

| Peak | Ret. Time | Area     | Height | Area%  |
|------|-----------|----------|--------|--------|
| 1    | 6.248     | 13191548 | 606033 | 50.847 |
| 2    | 8.347     | 12752214 | 452214 | 49.153 |

| Peak | Ret. Time | Area     | Height  | Area%  |
|------|-----------|----------|---------|--------|
| 1    | 6.208     | 1072957  | 55968   | 1.963  |
| 2    | 8.256     | 53578317 | 1910857 | 98.037 |

**(*S*<sub>a</sub>)-4-((3-(tert-butyl)-4'-chloro-5-methyl-[1,1'-biphenyl]-2-yl)oxy)-3-(hydroxydiphenylmethyl)isoquinolin-1(2*H*)-one (3s)**

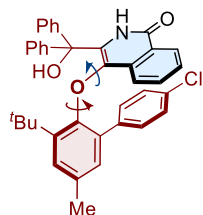

(PE:EA = 4:1) White solid. (53.4 mg, 89% yield, 97% ee). mp: 118–120 °C.

<sup>1</sup>H NMR (600 MHz, CDCl<sub>3</sub>) δ 8.26 (d, *J* = 7.7 Hz, 1H), 7.41 (h, *J* = 7.3 Hz, 6H), 7.30 (d, *J* = 7.2 Hz, 3H), 7.24 (d, *J* = 7.6 Hz, 3H), 7.21 (d, *J* = 6.4 Hz, 2H), 7.03 (d, *J* = 7.6 Hz, 1H), 6.94 (s, 2H), 6.64 (s, 2H), 4.79 (s, 1H), 2.32 (s, 3H), 1.07 (s, 9H).

<sup>13</sup>C NMR (151 MHz, CDCl<sub>3</sub>) δ 159.4, 150.0, 145.5, 141.4, 139.9, 136.5, 133.9, 133.3, 133.2, 132.8, 132.0, 131.9, 131.5, 131.4, 130.3, 129.4, 129.2, 128.7, 128.6, 128.5, 128.4, 128.3, 127.5, 126.9, 126.8, 125.4, 122.2, 81.4, 35.1, 30.2, 21.0.

HRMS (ESI): *m/z* [M+Na]<sup>+</sup> calcd for [C<sub>39</sub>H<sub>34</sub>ClNNaO<sub>3</sub>]<sup>+</sup> required 622.2125, found 622.2123.

[α]<sub>D</sub><sup>25</sup> = -4.00 (c = 0.05, CH<sub>2</sub>Cl<sub>2</sub>).

**HPLC Condition:** The enantiomeric excess was determined by HPLC analysis on a Daicel Chiralcel IC, Hexanes/IPA = 80/20, 1.0 mL/min, λ = 254 nm, *t* (minor) = 5.593 min, *t* (major) = 7.434 min.

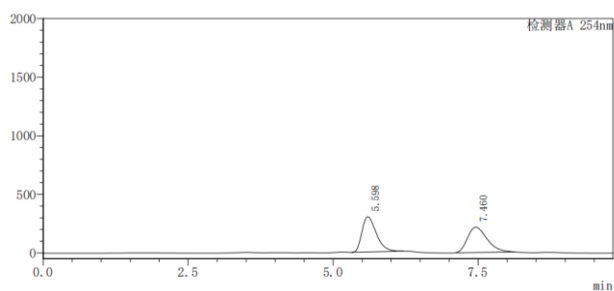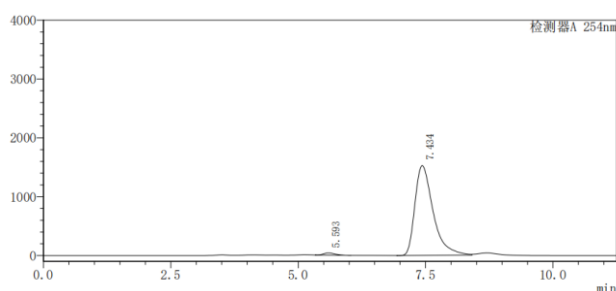

| Peak | Ret. Time | Area    | Height | Area%  |
|------|-----------|---------|--------|--------|
| 1    | 5.598     | 5175380 | 300782 | 50.460 |
| 2    | 7.460     | 5080937 | 216108 | 49.540 |

| Peak | Ret. Time | Area     | Height  | Area%  |
|------|-----------|----------|---------|--------|
| 1    | 5.593     | 577567   | 37290   | 1.500  |
| 2    | 7.434     | 37935022 | 1526483 | 98.500 |

**(*S*<sub>a</sub>)-4-((3-(tert-butyl)-4',5-dimethyl-[1,1'-biphenyl]-2-yl)oxy)-3-(hydroxydiphenylmethyl)isoquinolin-1(2H)-one (3t)**

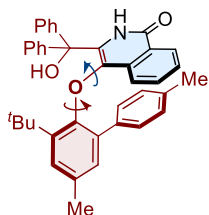

(PE:EA = 4:1) White solid. (52.2 mg, 90% yield, 97% ee). mp: 119–120 °C.

<sup>1</sup>H NMR (600 MHz, CDCl<sub>3</sub>) δ 8.21 (d, *J* = 7.7 Hz, 1H), 7.42 – 7.34 (m, 5H), 7.32 – 7.27 (m, 3H), 7.26 – 7.19 (m, 6H), 7.05 (d, *J* = 9.1 Hz, 1H), 6.77 (s, 2H), 6.69 (s, 2H), 4.92 (s, 1H), 2.32 (s, 3H), 2.22 (s, 3H), 1.07 (s, 9H).

<sup>13</sup>C NMR (151 MHz, CDCl<sub>3</sub>) δ 159.6, 150.1, 145.8, 141.6, 139.6, 136.6, 135.0, 134.1, 133.4, 132.7, 132.6, 132.2, 131.7, 130.1, 129.9, 129.3, 129.0, 128.9, 128.4, 128.3, 128.2, 128.1, 127.5, 127.3, 126.7, 125.4, 122.3, 81.4, 35.1, 30.2, 21.2, 21.0.

HRMS (ESI): *m/z* [M+H]<sup>+</sup> calcd for [C<sub>40</sub>H<sub>38</sub>NO<sub>3</sub>]<sup>+</sup> required 580.2852, found 580.2845.

[α]<sub>D</sub><sup>25</sup> = -6.00 (c = 0.05, CH<sub>2</sub>Cl<sub>2</sub>).

**HPLC Condition:** The enantiomeric excess was determined by HPLC analysis on a Daicel Chiralcel IC, Hexanes/IPA = 80/20, 1.0 mL/min, λ = 254 nm, *t* (minor) = 8.400 min, *t* (major) = 11.073 min.

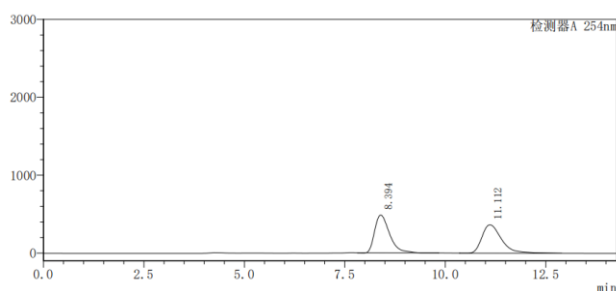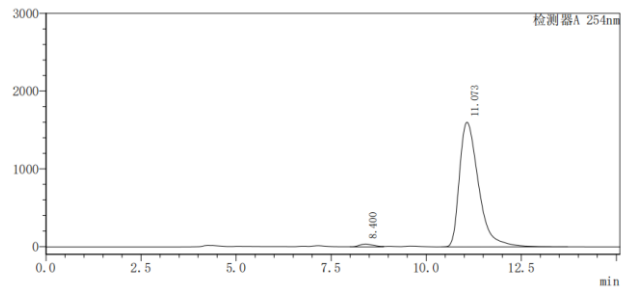

| Peak | Ret. Time | Area     | Height | Area%  |
|------|-----------|----------|--------|--------|
| 1    | 8.394     | 12418908 | 485993 | 50.276 |
| 2    | 11.112    | 12282541 | 365555 | 49.724 |

| Peak | Ret. Time | Area     | Height  | Area%  |
|------|-----------|----------|---------|--------|
| 1    | 8.400     | 932933   | 36146   | 1.643  |
| 2    | 11.073    | 55845687 | 1602864 | 98.357 |

**(*S*<sub>a</sub>)-4-((3,4'-di-tert-butyl-5-methyl-[1,1'-biphenyl]-2-yl)oxy)-3-(hydroxydiphenylmethyl)isoquinolin-1(2H)-one (3u)**

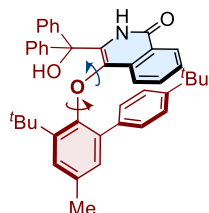

(PE:EA = 4:1) White solid. (52.9 mg, 85% yield, 94% ee). mp: 113–114 °C.

<sup>1</sup>H NMR (600 MHz, CDCl<sub>3</sub>) δ 8.19 (d, *J* = 7.2 Hz, 1H), 7.40 (d, *J* = 6.7 Hz, 3H), 7.36 (q, *J* = 7.0 Hz, 2H), 7.28 (q, *J* = 6.6 Hz, 5H), 7.22 (d, *J* = 5.8 Hz, 3H), 7.13 (s, 1H), 7.04 (d, *J* = 8.0 Hz, 1H), 6.98 (s, 2H), 6.72 (s, 2H), 4.94 (s, 1H), 2.32 (s, 3H), 1.21 (s, 9H), 1.08 (s, 9H).

<sup>13</sup>C NMR (151 MHz, CDCl<sub>3</sub>) δ 159.3, 150.1, 149.8, 145.8, 141.6, 139.5, 134.9, 133.9, 133.5, 132.6, 132.5, 132.1, 131.6, 130.0, 129.9, 129.3, 129.0, 128.3, 128.2, 128.1, 128.0, 127.9, 127.5, 126.6, 125.4, 123.4, 122.2, 81.4, 35.0, 34.4, 31.3, 30.2, 21.0.

HRMS (ESI): *m/z* [M+H]<sup>+</sup> calcd for [C<sub>43</sub>H<sub>44</sub>NO<sub>3</sub>]<sup>+</sup> required 622.3321, found 622.3324.

[α]<sub>D</sub><sup>25</sup> = +3.33 (c = 0.05, CH<sub>2</sub>Cl<sub>2</sub>).

**HPLC Condition:** The enantiomeric excess was determined by HPLC analysis on a Daicel Chiralcel IC, Hexanes/IPA = 95/5, 0.6 mL/min, λ = 254 nm, *t* (minor) = 10.552 min, *t* (major) = 13.277 min.

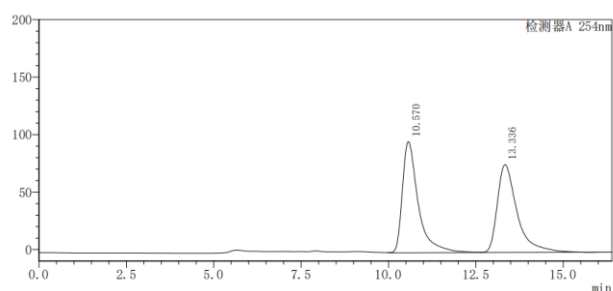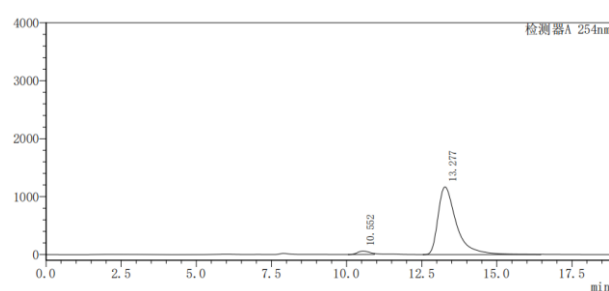

| Peak | Ret. Time | Area    | Height | Area%  |
|------|-----------|---------|--------|--------|
| 1    | 10.570    | 3050868 | 96655  | 50.430 |
| 2    | 13.336    | 2998829 | 76445  | 49.570 |

| Peak | Ret. Time | Area     | Height  | Area%  |
|------|-----------|----------|---------|--------|
| 1    | 10.552    | 1684001  | 59912   | 3.268  |
| 2    | 13.277    | 49851998 | 1168738 | 96.732 |

**(*S*<sub>a</sub>)-4-((3-(tert-butyl)-5-methyl-[1,1':4',1''-terphenyl]-2-yl)oxy)-3-(hydroxydiphenylmethyl)isoquinolin-1(2H)-one (3v)**

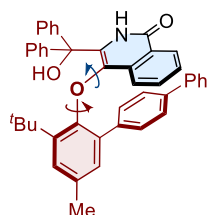

(PE:EA = 4:1) White solid. (61.7 mg, 96% yield, 97% ee). mp: 123–124 °C.

<sup>1</sup>H NMR (600 MHz, CDCl<sub>3</sub>) δ 8.23 (d, *J* = 6.8 Hz, 1H), 7.45 (d, *J* = 7.6 Hz, 2H), 7.43 – 7.37 (m, 4H), 7.35 – 7.27 (m, 7H), 7.24 (d, *J* = 7.2 Hz, 4H), 7.20 (d, *J* = 8.3 Hz, 4H), 7.07 (d, *J* = 7.5 Hz, 1H), 6.74 (s, 2H), 4.87 (s, 1H), 2.34 (s, 3H), 1.09 (s, 9H).

<sup>13</sup>C NMR (151 MHz, CDCl<sub>3</sub>) δ 159.4, 150.2, 145.6, 141.5, 141.0, 140.2, 139.8, 137.0, 134.1, 133.5, 132.8, 132.4, 132.0, 131.8, 130.6, 130.2, 129.3, 129.0, 128.9, 128.8, 128.4, 128.3, 128.3, 127.5, 127.4, 127.3, 126.7, 125.5, 125.4, 122.3, 81.5, 35.1, 30.2, 21.0.

HRMS (ESI): *m/z* [M+Na]<sup>+</sup> calcd for [C<sub>45</sub>H<sub>39</sub>NNaO<sub>3</sub>]<sup>+</sup> required 664.2828, found 664.2830.

[α]<sub>D</sub><sup>25</sup> = -12.67 (c = 0.05, CH<sub>2</sub>Cl<sub>2</sub>).

**HPLC Condition:** The enantiomeric excess was determined by HPLC analysis on a Daicel Chiralcel IC, Hexanes/IPA = 80/20, 1.0 mL/min, λ = 254 nm, *t* (minor) = 5.188 min, *t* (major) = 7.353 min.

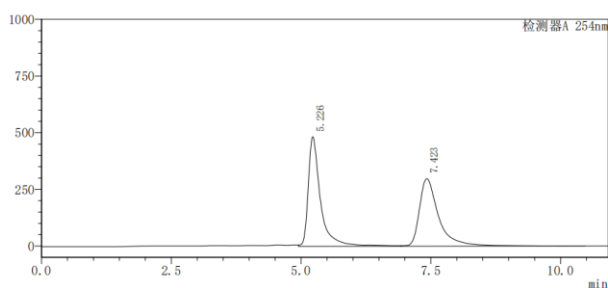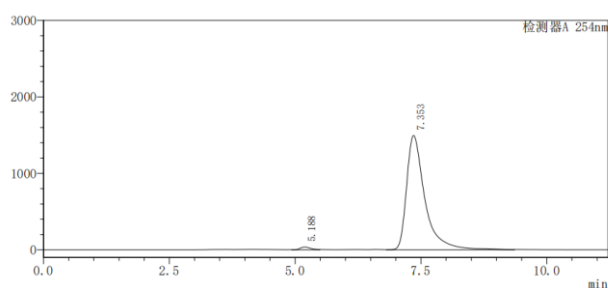

| Peak | Ret. Time | Area    | Height | Area%  |
|------|-----------|---------|--------|--------|
| 1    | 5.226     | 8025325 | 483783 | 51.019 |
| 2    | 7.423     | 7704598 | 297979 | 48.981 |

| Peak | Ret. Time | Area     | Height  | Area%  |
|------|-----------|----------|---------|--------|
| 1    | 5.188     | 550019   | 36170   | 1.425  |
| 2    | 7.353     | 38037698 | 1495107 | 98.575 |

**(*S*<sub>a</sub>)-4-((3-(tert-butyl)-5-methyl-4'-(trifluoromethyl)-[1,1'-biphenyl]-2-yl)oxy)-3-(hydroxydiphenylmethyl)isoquinolin-1(2H)-one (3w)**

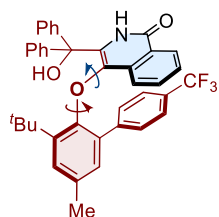

(PE:EA = 4:1) White solid. (58.4 mg, 92% yield, 95% ee). mp: 124–125 °C.

<sup>1</sup>H NMR (600 MHz, CDCl<sub>3</sub>) δ 8.24 (d, *J* = 7.4 Hz, 1H), 7.43 – 7.38 (m, 5H), 7.36 – 7.19 (m, 9H), 7.16 (d, *J* = 6.5 Hz, 2H), 7.03 (d, *J* = 7.4 Hz, 1H), 6.64 (s, 2H), 4.73 (s, 1H), 2.34 (s, 3H), 1.08 (s, 9H).

<sup>13</sup>C NMR (151 MHz, CDCl<sub>3</sub>) δ 159.2, 150.0, 145.4, 142.0, 141.2, 140.0, 133.8, 133.3, 133.0, 131.9, 131.7, 131.3, 130.7, 130.5, 129.5, 129.3, 129.1, 129.0, 128.9, 128.7, 128.4, 127.4, 126.9, 125.4, 125.0 (d, <sup>1</sup>*J*<sub>C-F</sub> = 272.1 Hz), 123.4, 123.4, 122.1, 81.4, 35.2, 30.1, 21.0.

<sup>19</sup>F NMR (565 MHz, CDCl<sub>3</sub>) δ -62.66.

HRMS (ESI): *m/z* [M+Na]<sup>+</sup> calcd for [C<sub>40</sub>H<sub>34</sub>F<sub>3</sub>NNaO<sub>3</sub>]<sup>+</sup> required 656.2388, found 656.2379.

[α]<sub>D</sub><sup>25</sup> = -11.33 (c = 0.05, CH<sub>2</sub>Cl<sub>2</sub>).

**HPLC Condition:** The enantiomeric excess was determined by HPLC analysis on a Daicel Chiralcel IC, Hexanes/IPA = 90/10, 0.8 mL/min, λ = 254 nm, *t* (minor) = 6.856 min, *t* (major) = 10.312 min.

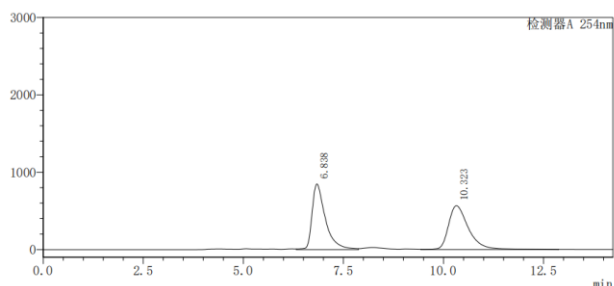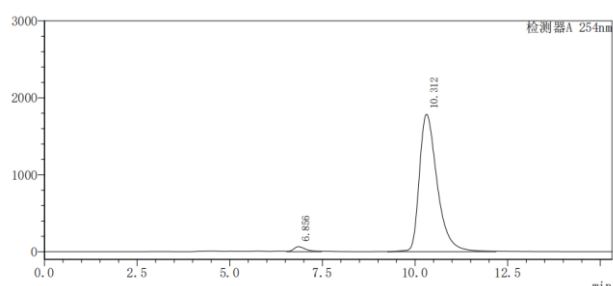

| Peak | Ret. Time | Area     | Height | Area%  |
|------|-----------|----------|--------|--------|
| 1    | 6.838     | 19673504 | 848193 | 49.917 |
| 2    | 10.323    | 19739114 | 565337 | 50.083 |

| Peak | Ret. Time | Area     | Height  | Area%  |
|------|-----------|----------|---------|--------|
| 1    | 6.856     | 1539983  | 66315   | 2.497  |
| 2    | 10.312    | 60145345 | 1786370 | 97.503 |

**(*S*<sub>a</sub>)-4-((3-(tert-butyl)-3',5-dimethyl-[1,1'-biphenyl]-2-yl)oxy)-3-(hydroxydiphenylmethyl)isoquinolin-1(2H)-one (3x)**

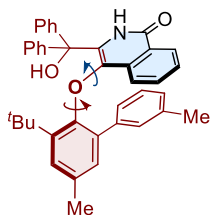

(PE:EA = 4:1) White solid. (46.4 mg, 80% yield, 96% ee). mp: 120–121 °C.

<sup>1</sup>H NMR (600 MHz, CDCl<sub>3</sub>) δ 8.24 (d, *J* = 9.3 Hz, 1H), 7.39 (dd, *J* = 7.7, 4.6 Hz, 6H), 7.31 – 7.21 (m, 9H), 7.10 (d, *J* = 9.4 Hz, 1H), 6.87 (d, *J* = 7.4 Hz, 2H), 6.67 (s, 1H), 4.86 (s, 1H), 2.31 (s, 3H), 1.99 (s, 3H), 1.08 (s, 9H).

<sup>13</sup>C NMR (151 MHz, CDCl<sub>3</sub>) δ 159.5, 150.1, 145.9, 141.5, 139.5, 138.0, 136.3, 134.1, 133.7, 132.6, 132.5, 132.2, 131.8, 130.8, 130.1, 129.2, 129.0, 128.9, 128.3, 128.2, 128.1, 127.6, 127.4, 126.6, 126.5, 125.4, 122.2, 81.2, 35.1, 30.2, 21.3, 20.9.

HRMS (ESI): *m/z* [M+H]<sup>+</sup> calcd for [C<sub>40</sub>H<sub>38</sub>NO<sub>3</sub>]<sup>+</sup> required 580.2852, found 580.2842.

[α]<sub>D</sub><sup>25</sup> = -7.33 (c = 0.05, CH<sub>2</sub>Cl<sub>2</sub>).

**HPLC Condition:** The enantiomeric excess was determined by HPLC analysis on a Daicel Chiralcel IC, Hexanes/IPA = 80/20, 1.0 mL/min, λ = 254 nm, *t* (minor) = 5.606 min, *t* (major) = 7.248 min.

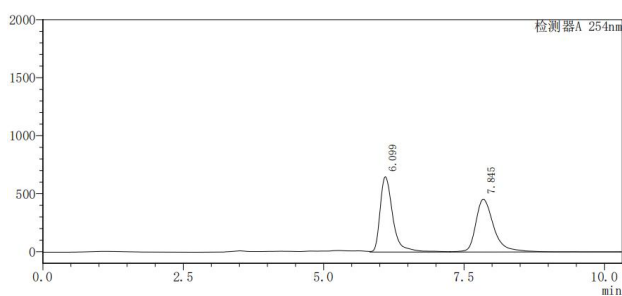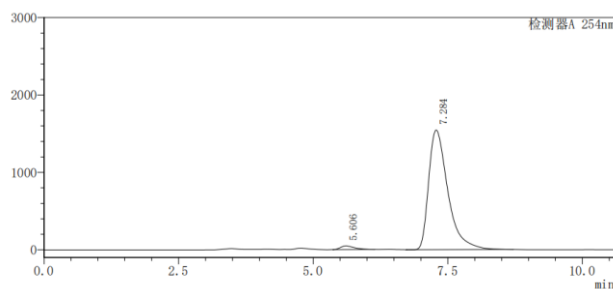

| Peak | Ret. Time | Area     | Height | Area%  |
|------|-----------|----------|--------|--------|
| 1    | 6.099     | 10263987 | 649033 | 50.217 |
| 2    | 7.845     | 10175362 | 455416 | 49.783 |

| Peak | Ret. Time | Area     | Height  | Area%  |
|------|-----------|----------|---------|--------|
| 1    | 5.606     | 872131   | 47836   | 2.224  |
| 2    | 7.284     | 38337518 | 1545964 | 97.776 |

**(*S*<sub>a</sub>)-3-(bis(4-fluorophenyl)(hydroxy)methyl)-4-((3-(tert-butyl)-5-methyl-[1,1'-biphenyl]-2-yl)oxy)isoquinolin-1(2H)-one (3y)**

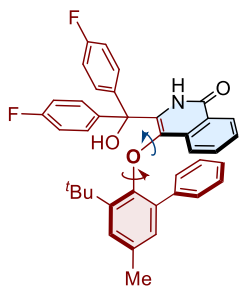

(PE:EA = 4:1) White solid. (55.4 mg, 92% yield, 97% ee). mp: 130–131 °C.

<sup>1</sup>H NMR (600 MHz, CDCl<sub>3</sub>) δ 8.19 (d, *J* = 7.5 Hz, 1H), 7.46 – 7.36 (m, 2H), 7.32 – 7.14 (m, 6H), 7.10 (t, *J* = 8.6 Hz, 2H), 7.08 – 7.03 (m, 2H), 6.99 (t, *J* = 8.7 Hz, 2H), 6.94 (s, 2H), 6.69 (s, 2H), 5.01 (s, 1H), 2.33 (s, 3H), 1.12 (s, 9H).

<sup>13</sup>C NMR (151 MHz, CDCl<sub>3</sub>) δ 164.0 (d, <sup>1</sup>*J*<sub>C-F</sub> = 250.0 Hz), 162.0 (d, <sup>1</sup>*J*<sub>C-F</sub> = 247.8 Hz), 159.5, 149.8, 141.6, 141.5, 139.5, 138.0, 137.3, 137.2, 134.1, 133.3, 132.9, 132.6, 132.3, 131.9, 130.8 (d, <sup>3</sup>*J*<sub>C-F</sub> = 8.3 Hz), 130.2, 129.3, 129.2, 128.4 (d, <sup>3</sup>*J*<sub>C-F</sub> = 12.9 Hz), 127.0, 126.6, 125.4, 122.2, 116.2 (d, <sup>2</sup>*J*<sub>C-F</sub> = 22.0 Hz), 115.2 (d, <sup>2</sup>*J*<sub>C-F</sub> = 21.6 Hz), 80.6, 35.1, 30.2, 21.0.

<sup>19</sup>F NMR (565 MHz, CDCl<sub>3</sub>) δ -112.06, -113.81.

HRMS (ESI): *m/z* [M+K]<sup>+</sup> calcd for [C<sub>39</sub>H<sub>33</sub>F<sub>2</sub>KNO<sub>3</sub>]<sup>+</sup> required 640.2066, found 640.2063.

[α]<sub>D</sub><sup>25</sup> = -21.33 (c = 0.05, CH<sub>2</sub>Cl<sub>2</sub>).

**HPLC Condition:** The enantiomeric excess was determined by HPLC analysis on a Daicel Chiralcel IC, Hexanes/IPA = 80/20, 1.0 mL/min, λ = 254 nm, *t* (minor) = 5.210 min, *t* (major) = 10.284 min.

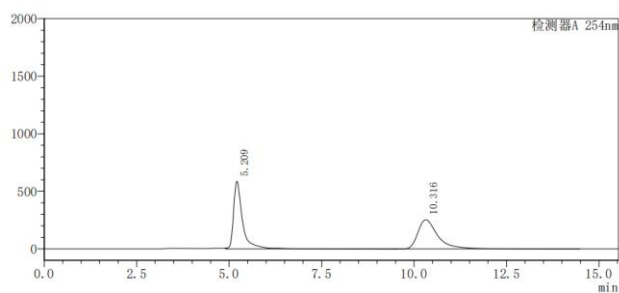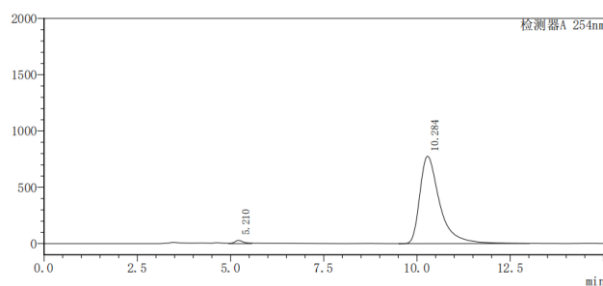

| Peak | Ret. Time | Area     | Height | Area%  |
|------|-----------|----------|--------|--------|
| 1    | 5.209     | 10085247 | 587630 | 51.460 |
| 2    | 10.316    | 9512808  | 253727 | 48.540 |

| Peak | Ret. Time | Area     | Height | Area%  |
|------|-----------|----------|--------|--------|
| 1    | 5.210     | 505693   | 29439  | 1.721  |
| 2    | 10.284    | 28877447 | 776440 | 98.279 |

**(*S<sub>a</sub>*)-3-(bis(4-chlorophenyl)(hydroxy)methyl)-4-((3-(tert-butyl)-5-methyl-[1,1'-biphenyl]-2-yl)oxy)isoquinolin-1(2H)-one (3z)**

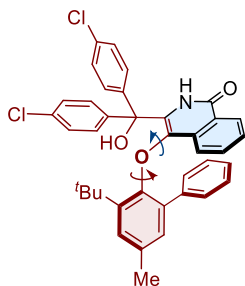

(PE:EA = 4:1) White solid. (60.2 mg, 95% yield, 97% ee). mp: 135–136 °C.

<sup>1</sup>H NMR (600 MHz, CDCl<sub>3</sub>) δ 8.19 (d, *J* = 6.5 Hz, 1H), 7.40 (t, *J* = 9.0 Hz, 4H), 7.30 – 7.24 (m, 3H), 7.17 (t, *J* = 9.3 Hz, 5H), 7.07 – 7.03 (m, 2H), 6.92 (s, 2H), 6.68 (s, 2H), 5.01 (s, 1H), 2.33 (s, 3H), 1.11 (s, 9H).

<sup>13</sup>C NMR (151 MHz, CDCl<sub>3</sub>) δ 159.5, 149.8, 144.1, 139.7, 139.5, 137.9, 135.7, 134.5, 134.2, 133.2, 133.0, 132.6, 132.3, 132.0, 130.2, 129.4, 128.9, 128.8, 128.6, 128.4, 128.3, 127.1, 127.0, 126.6, 125.4, 122.3, 80.6, 35.1, 30.2, 21.0.

HRMS (ESI): *m/z* [M+Na]<sup>+</sup>calcd for [C<sub>39</sub>H<sub>33</sub>Cl<sub>2</sub>NNaO<sub>3</sub>]<sup>+</sup> required 656.1735, found 656.1729.

[α]<sub>D</sub><sup>25</sup> = -3.67 (c = 0.05, CH<sub>2</sub>Cl<sub>2</sub>).

**HPLC Condition:** The enantiomeric excess was determined by HPLC analysis on a Daicel Chiralcel IC, Hexanes/IPA = 80/20, 1.0 mL/min, λ = 254 nm, *t* (minor) = 5.092 min, *t* (major) = 15.830 min.

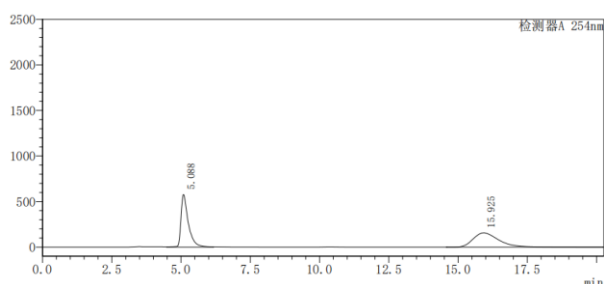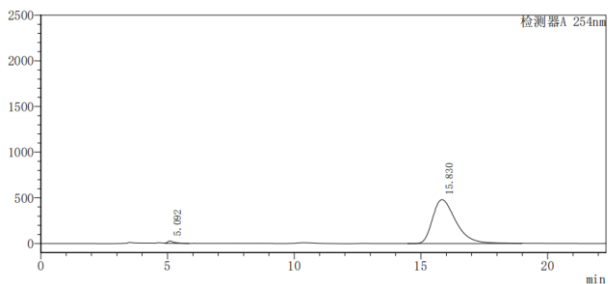

| Peak | Ret. Time | Area     | Height | Area%  |
|------|-----------|----------|--------|--------|
| 1    | 5.088     | 10658167 | 577841 | 51.322 |
| 2    | 15.925    | 10108881 | 156655 | 48.678 |

| Peak | Ret. Time | Area     | Height | Area%  |
|------|-----------|----------|--------|--------|
| 1    | 5.092     | 484922   | 26844  | 1.544  |
| 2    | 15.830    | 30917096 | 480150 | 98.456 |

**(*S*<sub>a</sub>)-3-(bis(4-bromophenyl)(hydroxy)methyl)-4-((3-(*tert*-butyl)-5-methyl-[1,1'-biphenyl]-2-yl)oxy)isoquinolin-1(2*H*)-one (3za)**

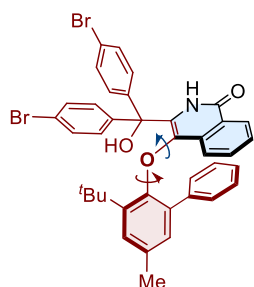

(PE:EA = 4:1) White solid. (70.2 mg, 97% yield, 97% ee). mp: 175–176 °C.

<sup>1</sup>H NMR (600 MHz, CDCl<sub>3</sub>) δ 8.20 (d, *J* = 7.3 Hz, 1H), 7.55 (d, *J* = 8.3 Hz, 2H), 7.46 – 7.37 (m, 4H), 7.26 (s, 1H), 7.10 (dd, *J* = 11.8, 8.5 Hz, 5H), 7.07 – 7.03 (m, 2H), 6.93 (s, 2H), 6.69 (s, 2H), 4.99 (s, 1H), 2.33 (s, 3H), 1.11 (s, 9H).

<sup>13</sup>C NMR (151 MHz, CDCl<sub>3</sub>) δ 159.5, 149.8, 144.6, 140.1, 139.6, 137.9, 134.2, 133.2, 133.0, 132.6, 132.4, 132.3, 132.0, 131.6, 130.5, 130.2, 129.2, 128.7, 128.5, 128.4, 127.1, 127.0, 126.7, 125.4, 124.0, 122.7, 122.3, 80.7, 35.2, 30.3, 21.0.

HRMS (ESI): *m/z* [M+Na]<sup>+</sup> calcd for [C<sub>39</sub>H<sub>33</sub>Br<sub>2</sub>NNaO<sub>3</sub>]<sup>+</sup> required 744.0704, found 744.0708.

[α]<sub>D</sub><sup>25</sup> = -16.00 (c = 0.05, CH<sub>2</sub>Cl<sub>2</sub>).

**HPLC Condition:** The enantiomeric excess was determined by HPLC analysis on a Daicel Chiralcel IC, Hexanes/IPA = 80/20, 1.0 mL/min, λ = 254 nm, *t* (minor) = 5.200 min, *t* (major) = 19.816 min.

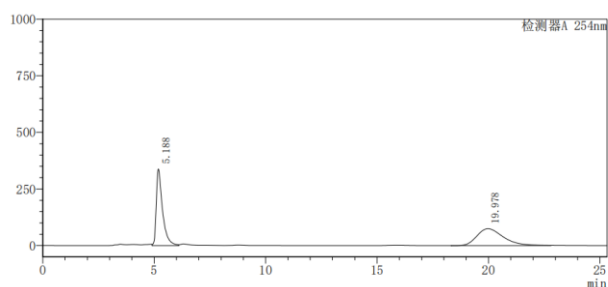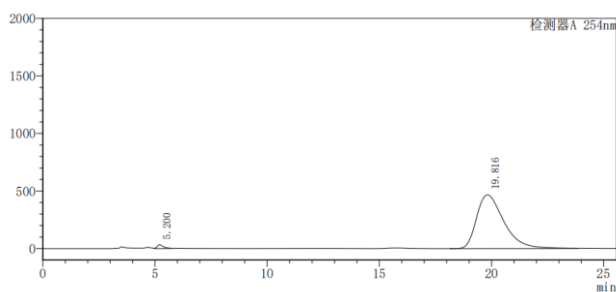

| Peak | Ret. Time | Area    | Height | Area%  |
|------|-----------|---------|--------|--------|
| 1    | 5.188     | 6608384 | 338241 | 51.397 |
| 2    | 19.978    | 6249225 | 74789  | 48.603 |

| Peak | Ret. Time | Area     | Height | Area%  |
|------|-----------|----------|--------|--------|
| 1    | 5.200     | 658537   | 33998  | 1.640  |
| 2    | 19.816    | 39502872 | 467078 | 98.360 |

(*S<sub>a</sub>*)-4-((3-(*tert*-butyl)-5-methyl-[1,1'-biphenyl]-2-yl)oxy)-3-(hydroxydi-*p*-tolylmethyl)isoquinolin-1(2*H*)-one  
(3zb)

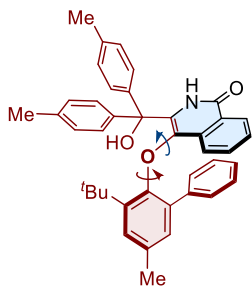

(PE:EA = 4:1) White solid. (57.1 mg, 93% yield, 96% ee). mp: 127–128 °C.

<sup>1</sup>H NMR (600 MHz, CDCl<sub>3</sub>) δ 8.17 (d, *J* = 6.0 Hz, 1H), 7.37 (d, *J* = 4.1 Hz, 2H), 7.29 (d, *J* = 9.9 Hz, 1H), 7.24 (d, *J* = 7.5 Hz, 1H), 7.20 (d, *J* = 7.8 Hz, 2H), 7.16 (d, *J* = 7.8 Hz, 2H), 7.08 (s, 5H), 7.01 (t, *J* = 7.6 Hz, 1H), 6.91 (s, 2H), 6.68 (s, 2H), 4.80 (s, 1H), 2.38 (s, 3H), 2.34 (s, 3H), 2.32 (s, 3H), 1.10 (s, 9H).

<sup>13</sup>C NMR (151 MHz, CDCl<sub>3</sub>) δ 159.5, 150.0, 143.0, 139.5, 139.0, 138.7, 138.1, 137.9, 133.9, 133.5, 132.4, 132.3, 131.7, 130.4, 130.2, 129.8, 128.9, 128.7, 128.3, 128.2, 127.4, 126.8, 126.6, 126.5, 125.3, 122.1, 81.2, 35.1, 30.3, 21.2, 21.1, 21.0.

HRMS (ESI): *m/z* [M+H]<sup>+</sup> calcd for [C<sub>41</sub>H<sub>40</sub>NO<sub>3</sub>]<sup>+</sup> required 594.3008, found 594.3010.

[α]<sub>D</sub><sup>25</sup> = -4.67 (c = 0.05, CH<sub>2</sub>Cl<sub>2</sub>).

**HPLC Condition:** The enantiomeric excess was determined by HPLC analysis on a Daicel Chiralcel IC, Hexanes/IPA = 95/5, 0.6 mL/min, λ = 254 nm, *t* (minor) = 6.775 min, *t* (major) = 10.055 min.

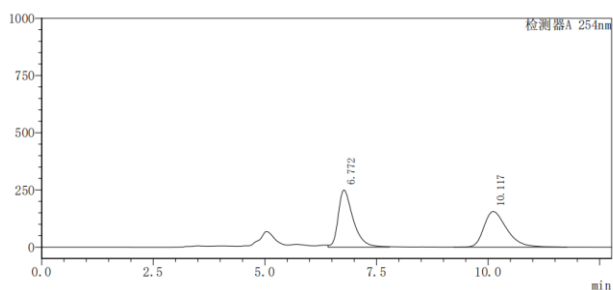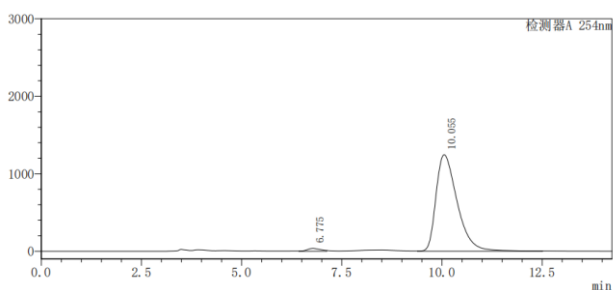

| Peak | Ret. Time | Area    | Height | Area%  |
|------|-----------|---------|--------|--------|
| 1    | 6.772     | 5800688 | 249843 | 50.976 |
| 2    | 10.117    | 5578603 | 155745 | 49.024 |

| Peak | Ret. Time | Area     | Height  | Area%  |
|------|-----------|----------|---------|--------|
| 1    | 6.775     | 828523   | 36873   | 1.776  |
| 2    | 10.055    | 45811923 | 1245061 | 98.224 |

**(*S<sub>a</sub>*)-4-((3-(tert-butyl)-5-methyl-[1,1'-biphenyl]-2-yl)oxy)-3-(di([1,1'-biphenyl]-4-yl)(hydroxy)methyl)isoquinolin-1(2H)-one (3zc)**

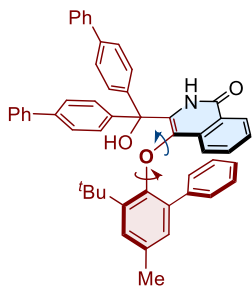

(PE:EA = 2:1) White solid. (66.1 mg, 92% yield, 96% ee). mp: 166–165 °C.

<sup>1</sup>H NMR (600 MHz, CDCl<sub>3</sub>) δ 8.22 (d, *J* = 8.9 Hz, 1H), 7.68 – 7.58 (m, 6H), 7.55 (d, *J* = 8.1 Hz, 2H), 7.45 (q, *J* = 8.0 Hz, 4H), 7.43 – 7.28 (m, 9H), 7.24 (d, *J* = 7.3 Hz, 1H), 7.13 – 7.04 (m, 2H), 6.97 (s, 2H), 6.70 (s, 2H), 4.96 (s, 1H), 2.33 (s, 3H), 1.10 (s, 9H).

<sup>13</sup>C NMR (151 MHz, CDCl<sub>3</sub>) δ 159.6, 150.0, 144.8, 142.2, 141.2, 140.8, 140.4, 140.3, 139.6, 138.0, 134.1, 133.5, 132.7, 132.6, 132.3, 131.8, 130.3, 130.0, 129.3, 129.0, 128.8, 128.4, 128.3, 128.0, 127.9, 127.8, 127.6, 127.4, 127.2, 127.1, 126.9, 126.8, 126.6, 125.4, 122.2, 81.1, 35.1, 30.3, 21.0.

HRMS (ESI): *m/z* [M+H]<sup>+</sup> calcd for [C<sub>51</sub>H<sub>44</sub>NO<sub>3</sub>]<sup>+</sup> required 718.3381, found 718.3384.

[α]<sub>D</sub><sup>25</sup> = +31.33 (c = 0.05, CH<sub>2</sub>Cl<sub>2</sub>).

**HPLC Condition:** The enantiomeric excess was determined by HPLC analysis on a Daicel Chiralcel IC, Hexanes/IPA = 80/20, 1.0 mL/min, λ = 254 nm, *t* (minor) = 8.756 min, *t* (major) = 20.226 min.

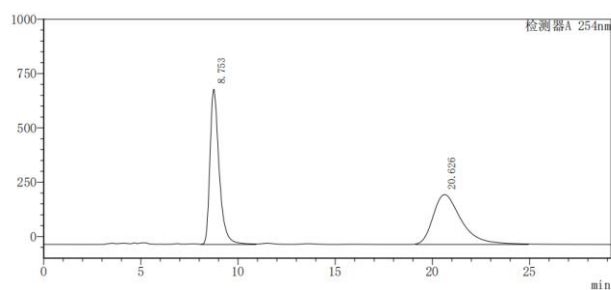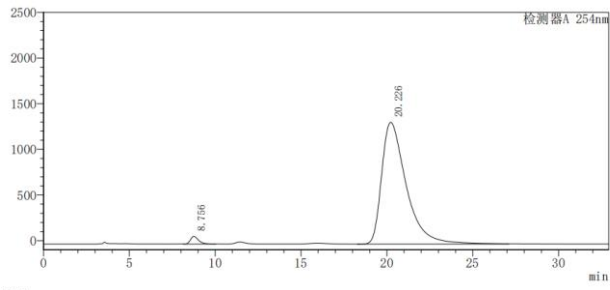

| Peak | Ret. Time | Area     | Height | Area%  |
|------|-----------|----------|--------|--------|
| 1    | 8.753     | 23563138 | 714481 | 50.274 |
| 2    | 20.626    | 23306316 | 229948 | 49.726 |

| Peak | Ret. Time | Area      | Height  | Area%  |
|------|-----------|-----------|---------|--------|
| 1    | 8.756     | 2795234   | 83978   | 2.060  |
| 2    | 20.226    | 132872415 | 1333160 | 97.940 |

**(*S*<sub>a</sub>)-4-((3-(tert-butyl)-5-methyl-[1,1'-biphenyl]-2-yl)oxy)-3-(hydroxybis(4-methoxyphenyl)methyl)isoquinolin-1(2H)-one (3zd)**

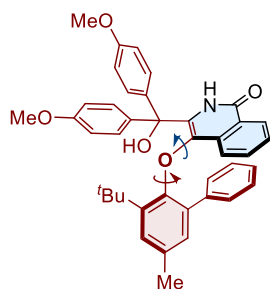

(PE:EA = 4:1) White solid. (52.0 mg, 83% yield, 96% ee). mp: 124–125 °C.

<sup>1</sup>H NMR (600 MHz, CDCl<sub>3</sub>) δ 8.18 (d, *J* = 6.3 Hz, 1H), 7.37 (d, *J* = 6.1 Hz, 2H), 7.28 (s, 1H), 7.25 (d, *J* = 5.7 Hz, 1H), 7.18 (d, *J* = 8.4 Hz, 2H), 7.12 (d, *J* = 8.4 Hz, 2H), 7.07 (d, *J* = 6.0 Hz, 1H), 7.03 (t, *J* = 7.5 Hz, 1H), 6.92 (d, *J* = 8.7 Hz, 4H), 6.81 (d, *J* = 8.8 Hz, 2H), 6.69 (s, 2H), 4.82 (s, 1H), 3.84 (s, 3H), 3.80 (s, 3H), 2.32 (s, 3H), 1.13 (s, 9H).

<sup>13</sup>C NMR (151 MHz, CDCl<sub>3</sub>) δ 160.1, 159.6, 159.5, 149.9, 139.5, 138.2, 138.1, 133.8, 133.5, 132.5, 132.4, 132.2, 131.7, 130.5, 130.2, 130.1, 128.7, 128.3, 128.2, 126.8, 126.6, 126.5, 125.2, 122.1, 114.4, 113.6, 80.9, 55.5, 55.4, 35.1, 30.2, 21.0.

HRMS (ESI): *m/z* [M+Na]<sup>+</sup> calcd for [C<sub>41</sub>H<sub>39</sub>NNaO<sub>5</sub>]<sup>+</sup> required 648.2726, found 648.2736.

[α]<sub>D</sub><sup>25</sup> = +8.00 (c = 0.05, CH<sub>2</sub>Cl<sub>2</sub>).

**HPLC Condition:** The enantiomeric excess was determined by HPLC analysis on a Daicel Chiralcel IC, Hexanes/IPA = 80/20, 1.0 mL/min, λ = 254 nm, *t* (minor) = 10.067 min, *t* (major) = 25.770 min.

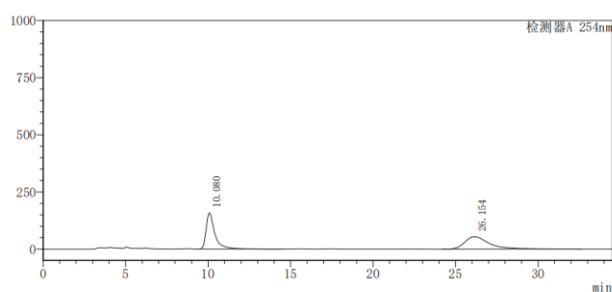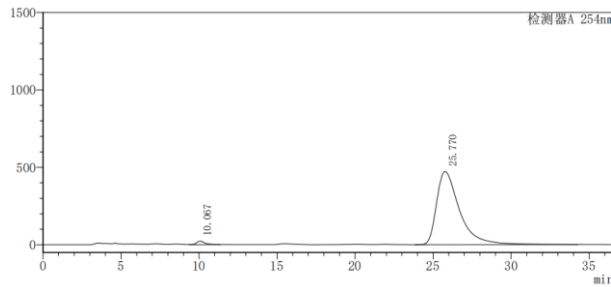

| Peak | Ret. Time | Area    | Height | Area%  |
|------|-----------|---------|--------|--------|
| 1    | 10.080    | 5747166 | 157522 | 50.967 |
| 2    | 26.154    | 5528976 | 54257  | 49.033 |

| Peak | Ret. Time | Area     | Height | Area%  |
|------|-----------|----------|--------|--------|
| 1    | 10.067    | 916603   | 22931  | 1.841  |
| 2    | 25.770    | 48881574 | 472787 | 98.159 |

**(*S*<sub>a</sub>)-4,4'-((4-((3-(tert-butyl)-5-methyl-[1,1'-biphenyl]-2-yl)oxy)-1-oxo-1,2-dihydroisoquinolin-3-yl)(hydroxy)methylene)dibenzonitrile (3ze)**

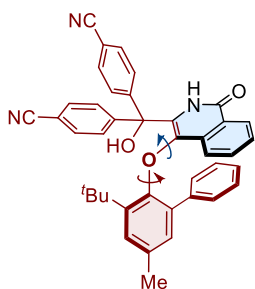

(PE:EA = 2:1) White solid. (54.8 mg, 89% yield, 97% ee). mp: 171–173 °C.

**<sup>1</sup>H NMR** (600 MHz, CDCl<sub>3</sub>) δ 8.17 (d, *J* = 7.6 Hz, 1H), 7.72 (d, *J* = 8.4 Hz, 2H), 7.64 (d, *J* = 8.5 Hz, 2H), 7.43 (dd, *J* = 18.7, 8.1 Hz, 4H), 7.35 (d, *J* = 8.4 Hz, 2H), 7.26 (s, 1H), 7.05 (d, *J* = 7.5 Hz, 3H), 6.92 (s, 2H), 6.68 (d, *J* = 2.2 Hz, 2H), 5.35 (s, 1H), 2.33 (s, 3H), 1.08 (s, 9H).

**<sup>13</sup>C NMR** (151 MHz, CDCl<sub>3</sub>) δ 159.4, 150.0, 149.6, 145.4, 139.4, 137.8, 134.5, 133.4, 133.0, 132.9, 132.6, 132.5, 132.3, 132.2, 130.0, 129.5, 128.5, 128.4, 128.3, 127.5, 127.1, 127.0, 126.8, 125.5, 122.4, 118.3, 117.9, 113.8, 112.9, 80.4, 35.1, 30.2, 21.0.

**HRMS** (ESI): *m/z* [M+Na]<sup>+</sup> calcd for [C<sub>41</sub>H<sub>33</sub>N<sub>3</sub>NaO<sub>3</sub>]<sup>+</sup> required 638.2420, found 638.2430.

[α]<sub>D</sub><sup>25</sup> = -28.67 (c = 0.05, CH<sub>2</sub>Cl<sub>2</sub>).

**HPLC Condition:** The enantiomeric excess was determined by HPLC analysis on a Daicel Chiralcel IC, Hexanes/IPA = 80/20, 1.0 mL/min, λ = 254 nm, *t* (minor) = 29.345 min, *t* (major) = 95.116 min.

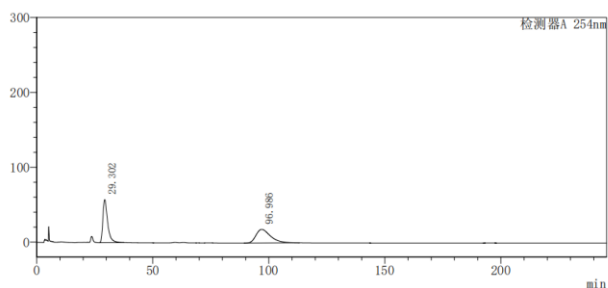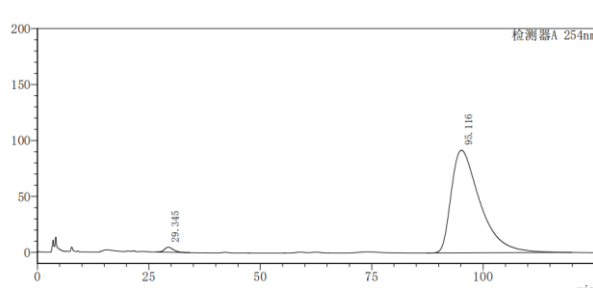

| Peak | Ret. Time | Area    | Height | Area%  |
|------|-----------|---------|--------|--------|
| 1    | 29.302    | 8225356 | 57486  | 50.819 |
| 2    | 96.986    | 7960340 | 18226  | 49.181 |

| Peak | Ret. Time | Area     | Height | Area%  |
|------|-----------|----------|--------|--------|
| 1    | 29.345    | 642743   | 4487   | 1.532  |
| 2    | 95.116    | 41312631 | 91731  | 98.468 |

**(S<sub>a</sub>)-3-(bis(3-chlorophenyl)(hydroxy)methyl)-4-((3-(tert-butyl)-5-methyl-[1,1'-biphenyl]-2-yl)oxy)isoquinolin-1(2H)-one (3zf)**

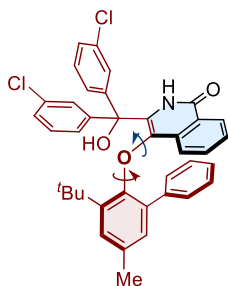

(PE:EA = 4:1) White solid. (57.8 mg, 91% yield, 96% ee). mp: 148–149 °C.

<sup>1</sup>H NMR (600 MHz, CDCl<sub>3</sub>) δ 8.22 (d, *J* = 7.5 Hz, 1H), 7.46 (s, 1H), 7.43 – 7.39 (m, 3H), 7.31 (q, *J* = 7.4 Hz, 3H), 7.24 (d, *J* = 9.6 Hz, 3H), 7.07 (dd, *J* = 12.7, 7.8 Hz, 3H), 6.93 (d, *J* = 7.9 Hz, 3H), 6.69 (s, 2H), 5.09 (s, 1H), 2.33 (s, 3H), 1.12 (s, 9H).

<sup>13</sup>C NMR (151 MHz, CDCl<sub>3</sub>) δ 159.5, 149.8, 147.3, 143.0, 139.6, 137.8, 135.7, 134.9, 134.2, 133.2, 133.0, 132.7, 132.2, 132.0, 130.2, 130.1, 129.8, 129.7, 129.1, 128.8, 128.5, 128.4, 128.3, 127.7, 127.2, 127.1, 127.0, 126.8, 125.7, 125.5, 122.3, 80.6, 35.2, 30.1, 21.0.

HRMS (ESI): *m/z* [M+Na]<sup>+</sup> calcd for [C<sub>39</sub>H<sub>33</sub>Cl<sub>2</sub>NNaO<sub>3</sub>]<sup>+</sup> required 656.1735, found 656.1738.

[α]<sub>D</sub><sup>25</sup> = -4.00 (c = 0.05, CH<sub>2</sub>Cl<sub>2</sub>).

**HPLC Condition:** The enantiomeric excess was determined by HPLC analysis on a Daicel Chiralcel IC, Hexanes/IPA = 90/10, 0.8 mL/min, λ = 254 nm, *t* (minor) = 7.795 min, *t* (major) = 11.893 min.

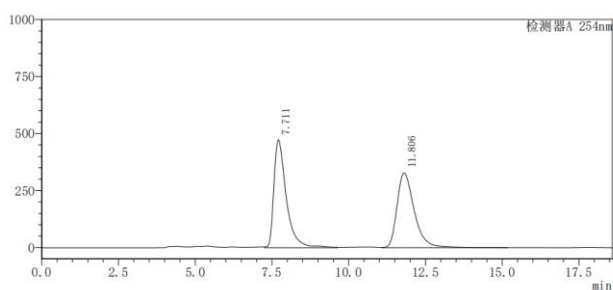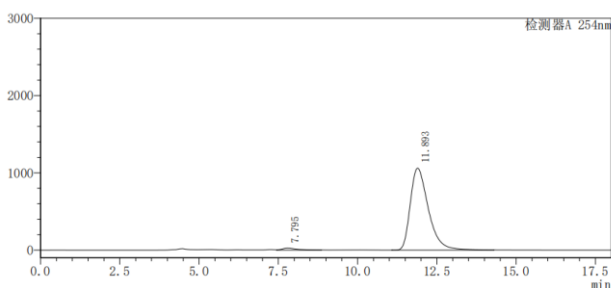

| Peak | Ret. Time | Area     | Height | Area%  |
|------|-----------|----------|--------|--------|
| 1    | 7.711     | 13282207 | 472823 | 51.045 |
| 2    | 11.806    | 12738524 | 327970 | 48.955 |

| Peak | Ret. Time | Area     | Height  | Area%  |
|------|-----------|----------|---------|--------|
| 1    | 7.795     | 925874   | 25610   | 2.145  |
| 2    | 11.893    | 42243592 | 1060975 | 97.855 |

**(*S*<sub>a</sub>)-4-((3-(tert-butyl)-5-methyl-[1,1'-biphenyl]-2-yl)oxy)-3-(9-hydroxy-9H-fluoren-9-yl)isoquinolin-1(2H)-one**  
**(3zg)**

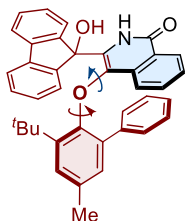

(PE:EA = 2:1) White solid. (31.0 mg, 55% yield, 85% ee). mp: 124–125 °C.

<sup>1</sup>H NMR (600 MHz, CDCl<sub>3</sub>) δ 8.13 (d, *J* = 7.9 Hz, 1H), 7.81 (d, *J* = 7.6 Hz, 1H), 7.68 (d, *J* = 7.6 Hz, 1H), 7.60 (d, *J* = 7.5 Hz, 2H), 7.50 (t, *J* = 7.5 Hz, 1H), 7.41 (dd, *J* = 16.7, 8.2 Hz, 2H), 7.37 – 7.32 (m, 3H), 7.25 (d, *J* = 11.1 Hz, 3H), 7.18 – 7.16 (m, 2H), 7.12 – 7.03 (m, 2H), 6.67 (s, 2H), 5.24 (s, 1H), 2.36 (s, 3H), 1.67 (s, 9H).

<sup>13</sup>C NMR (151 MHz, CDCl<sub>3</sub>) δ 160.0, 150.3, 148.6, 144.3, 141.5, 139.1, 138.9, 134.5, 134.0, 132.9, 132.7, 131.8, 131.1, 130.0, 129.2, 128.6, 128.5, 128.4, 128.3, 127.0, 126.7, 125.6, 126.4, 124.8, 122.1, 121.0, 120.7, 84.1, 35.8, 30.9, 21.0.

HRMS (ESI): *m/z* [M+H]<sup>+</sup> calcd for [C<sub>39</sub>H<sub>34</sub>NO<sub>3</sub>]<sup>+</sup> required 564.2539, found 564.2530.

[α]<sub>D</sub><sup>25</sup> = -8.00 (c = 0.05, CH<sub>2</sub>Cl<sub>2</sub>).

**HPLC Condition:** The enantiomeric excess was determined by HPLC analysis on a Daicel Chiralcel IC, Hexanes/IPA = 90/10, 0.8 mL/min, λ = 254 nm, *t* (minor) = 23.063 min, *t* (major) = 35.714 min.

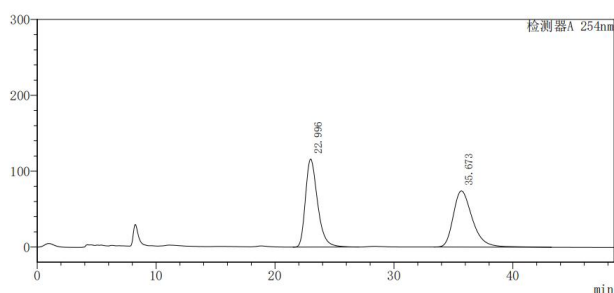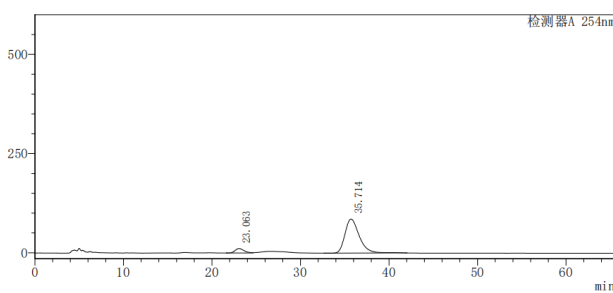

| Peak | Ret. Time | Area    | Height | Area%  |
|------|-----------|---------|--------|--------|
| 1    | 22.996    | 8221178 | 116001 | 49.862 |
| 2    | 35.673    | 8266602 | 74039  | 50.138 |

| Peak | Ret. Time | Area    | Height | Area%  |
|------|-----------|---------|--------|--------|
| 1    | 23.063    | 800316  | 11266  | 7.686  |
| 2    | 35.714    | 9611683 | 85760  | 92.314 |

**(*S*<sub>a</sub>)-4-((3-(tert-butyl)-5-methyl-[1,1'-biphenyl]-2-yl)oxy)-3-(hydroxydi(thiophen-3-yl)methyl)isoquinolin-1(2*H*)-one (3zh)**

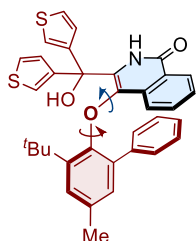

(PE:EA = 4:1) White solid. (46.8 mg, 81% yield, 80% ee). mp: 123–124 °C.

<sup>1</sup>H NMR (600 MHz, CDCl<sub>3</sub>) δ 8.97 (s, 1H), 8.25 (d, *J* = 7.4 Hz, 1H), 7.37 (p, *J* = 6.9 Hz, 2H), 7.26 (d, *J* = 8.3 Hz, 2H), 7.18 (d, *J* = 5.1 Hz, 1H), 7.06 (dd, *J* = 16.5, 3.8 Hz, 3H), 7.00 (t, *J* = 5.0 Hz, 1H), 6.96 – 6.86 (m, 4H), 6.63 (s, 1H), 6.50 (s, 2H), 5.54 (s, 1H), 2.33 (s, 3H), 1.53 (s, 9H).

<sup>13</sup>C NMR (151 MHz, CDCl<sub>3</sub>) δ 152.2, 151.5, 150.0, 139.5, 139.3 (2C), 132.9, 132.5, 131.8, 131.6, 131.0, 129.0, 128.9, 128.4, 128.1, 127.2 (2C), 127.1, 126.7, 125.1, 124.8, 124.4, 123.5, 122.6, 65.2, 35.7, 31.2, 21.1.

HRMS (ESI): *m/z* [M+K]<sup>+</sup> calcd for [C<sub>35</sub>H<sub>31</sub>KNO<sub>3</sub>S<sub>2</sub>]<sup>+</sup> required 616.1382, found 616.1391.

[α]<sub>D</sub><sup>25</sup> = -31.33 (c = 0.05, CH<sub>2</sub>Cl<sub>2</sub>).

**HPLC Condition:** The enantiomeric excess was determined by HPLC analysis on a Daicel Chiralcel IB, Hexanes/IPA = 90/10, 1.0 mL/min, λ = 254 nm, *t* (minor) = 9.781 min, *t* (major) = 8.458 min.

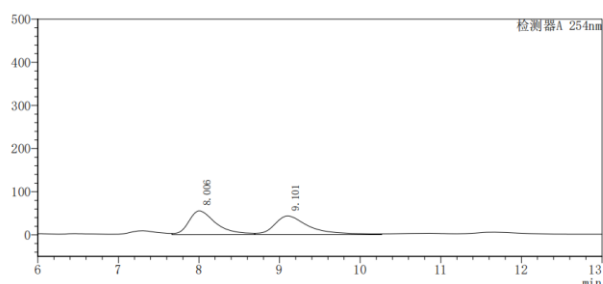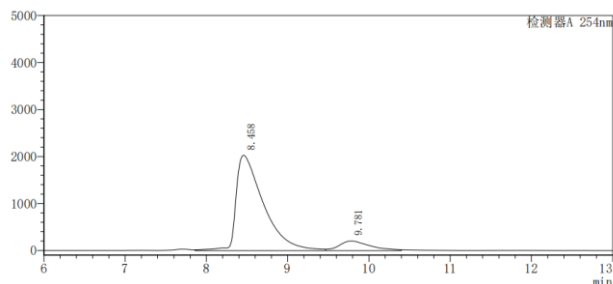

| Peak | Ret. Time | Area    | Height | Area%  |
|------|-----------|---------|--------|--------|
| 1    | 8.006     | 1309897 | 55157  | 50.021 |
| 2    | 9.101     | 1308785 | 43284  | 49.979 |

| Peak | Ret. Time | Area     | Height  | Area%  |
|------|-----------|----------|---------|--------|
| 1    | 8.458     | 47663675 | 2029429 | 89.843 |
| 2    | 9.781     | 5388583  | 203797  | 10.157 |

**(S<sub>a</sub>)-4-((3-(tert-butyl)-5-methyl-[1,1'-biphenyl]-2-yl)oxy)-3-(2-hydroxypropan-2-yl)isoquinolin-1(2H)-one (3zi)**

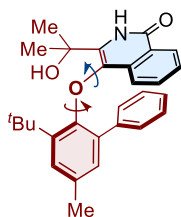

(PE:EA = 4:1) White solid. (42.0 mg, 95% yield, 77% ee). mp: 128–129 °C.

<sup>1</sup>H NMR (600 MHz, CDCl<sub>3</sub>) δ 9.28 (s, 1H), 8.22 (d, *J* = 6.6 Hz, 1H), 7.40 – 7.34 (m, 2H), 7.32 (s, 1H), 7.15 (d, *J* = 8.0 Hz, 1H), 6.99 (t, *J* = 7.4 Hz, 1H), 6.90 – 6.71 (m, 2H), 6.61 (s, 1H), 6.53 (d, *J* = 67.7 Hz, 2H), 4.08 (s, 1H), 2.32 (s, 3H), 1.88 (s, 3H), 1.63 (s, 3H), 1.59 (s, 9H).

<sup>13</sup>C NMR (151 MHz, CDCl<sub>3</sub>) δ 151.0, 139.0, 138.9, 134.7, 132.9, 132.3, 132.2, 131.9, 131.6, 131.5, 131.4, 129.8, 128.2, 128.0, 126.9, 126.7, 126.5, 126.4, 126.1, 126.0, 122.4, 71.2, 35.8, 30.9, 30.8, 28.6, 20.9.

HRMS (ESI): *m/z* [M+H]<sup>+</sup> calcd for [C<sub>29</sub>H<sub>32</sub>NO<sub>3</sub>]<sup>+</sup> required 442.2382, found 442.2377.

[α]<sub>D</sub><sup>25</sup> = -8.33 (c = 0.05, CH<sub>2</sub>Cl<sub>2</sub>).

**HPLC Condition:** The enantiomeric excess was determined by HPLC analysis on a Daicel Chiralcel IC, Hexanes/IPA = 80/20, 1.0 mL/min, λ = 254 nm, *t* (minor) = 6.491 min, *t* (major) = 8.011 min.

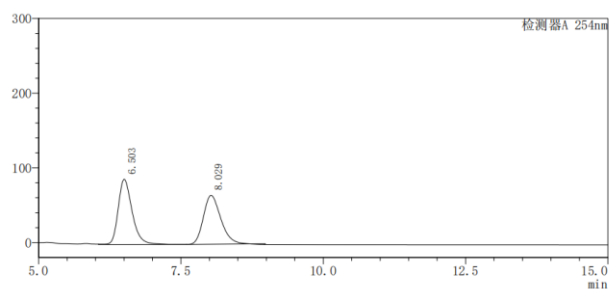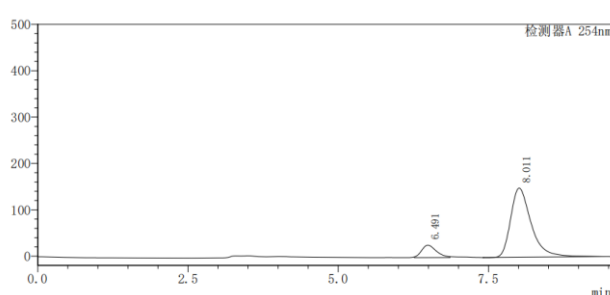

| Peak | Ret. Time | Area    | Height | Area%  |
|------|-----------|---------|--------|--------|
| 1    | 6.503     | 1484318 | 87290  | 51.860 |
| 2    | 8.029     | 1377848 | 65431  | 48.140 |

| Peak | Ret. Time | Area    | Height | Area%  |
|------|-----------|---------|--------|--------|
| 1    | 6.491     | 458374  | 26891  | 11.463 |
| 2    | 8.011     | 3540364 | 149078 | 88.537 |

**(S<sub>a</sub>)-4-((3-(tert-butyl)-5-methyl-[1,1'-biphenyl]-2-yl)oxy)-3-(1-hydroxycyclopentyl)isoquinolin-1(2H)-one (3zj)**

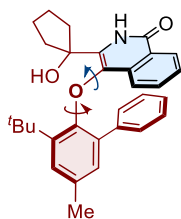

(PE:EA = 2:1) White solid. (35.1 mg, 75% yield, 72% ee). mp: 187–188 °C.

<sup>1</sup>H NMR (600 MHz, CDCl<sub>3</sub>) δ 9.41 (s, 1H), 8.21 (d, *J* = 7.5 Hz, 1H), 7.37 (t, *J* = 6.8 Hz, 2H), 7.31 (s, 1H), 7.15 (d, *J* = 7.9 Hz, 1H), 6.99 (t, *J* = 7.3 Hz, 1H), 6.84 (s, 2H), 6.59 (d, *J* = 20.4 Hz, 3H), 4.11 (s, 1H), 2.89 – 2.79 (m, 1H), 2.32 (s, 3H), 2.27 – 2.17 (m, 1H), 2.11 – 1.96 (m, 3H), 1.94 – 1.80 (m, 3H), 1.56 (s, 9H).

<sup>13</sup>C NMR (151 MHz, CDCl<sub>3</sub>) δ 150.9, 138.9, 138.8, 134.7, 132.3, 132.2, 131.6 (2C), 131.4, 131.2, 129.7, 128.2, 127.9, 126.8, 126.4, 126.0, 122.3, 81.3, 41.9, 37.9, 35.7, 30.7, 23.7, 22.7, 20.9.

HRMS (ESI): *m/z* [M+H]<sup>+</sup> calcd for [C<sub>31</sub>H<sub>34</sub>NO<sub>3</sub>]<sup>+</sup> required 468.2539, found 468.2529.

[α]<sub>D</sub><sup>25</sup> = -5.67 (c = 0.05, CH<sub>2</sub>Cl<sub>2</sub>).

**HPLC Condition:** The enantiomeric excess was determined by HPLC analysis on a Daicel Chiralcel IC, Hexanes/IPA = 80/20, 1.0 mL/min, λ = 254 nm, *t* (minor) = 6.398 min, *t* (major) = 10.720 min.

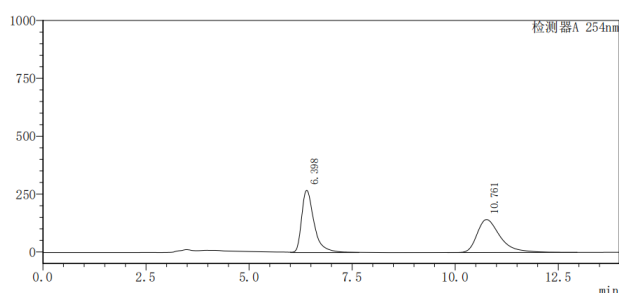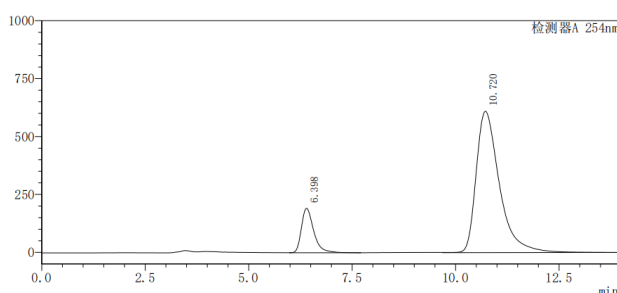

| Peak | Ret. Time | Area    | Height | Area%  |
|------|-----------|---------|--------|--------|
| 1    | 6.398     | 5643198 | 268854 | 50.520 |
| 2    | 10.761    | 5526979 | 142314 | 49.480 |

| Peak | Ret. Time | Area     | Height | Area%  |
|------|-----------|----------|--------|--------|
| 1    | 6.398     | 3957824  | 191878 | 14.252 |
| 2    | 10.720    | 23812976 | 609950 | 85.748 |

**(S<sub>a</sub>)-4-((3-(tert-butyl)-5-methyl-[1,1'-biphenyl]-2-yl)oxy)-3-(1-hydroxycyclohexyl)isoquinolin-1(2H)-one (3zk)**

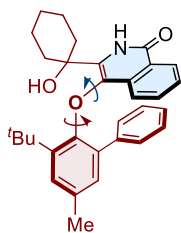

(PE:EA = 2:1) White solid. (35.2 mg, 73% yield, 81% ee). mp: 193–194 °C.

**<sup>1</sup>H NMR** (600 MHz, CDCl<sub>3</sub>) δ 9.40 (s, 1H), 8.21 (s, 1H), 7.39 – 7.31 (m, 3H), 7.17 – 7.12 (m, 1H), 6.98 (t, *J* = 7.4 Hz, 1H), 6.82 (s, 2H), 6.61 (s, 3H), 3.73 (s, 1H), 2.63 – 2.58 (m, 1H), 2.32 (s, 3H), 2.20 – 2.11 (m, 1H), 1.93 (d, *J* = 12.8 Hz, 1H), 1.83 – 1.69 (m, 4H), 1.63 (s, 3H), 1.62 (s, 9H).

**<sup>13</sup>C NMR** (151 MHz, CDCl<sub>3</sub>) δ 151.0, 139.0, 138.8, 134.8, 133.5, 132.4, 131.9, 131.6, 131.5, 131.1, 129.9, 128.2, 128.0, 126.8, 126.4, 125.9, 122.4, 73.1, 36.4, 35.8, 34.1, 31.0, 24.5, 21.8, 21.6, 20.9.

**HRMS** (ESI): *m/z* [M+Na]<sup>+</sup> calcd for [C<sub>32</sub>H<sub>35</sub>NNaO<sub>3</sub>]<sup>+</sup> required 504.2515, found 504.2509.

[α]<sub>D</sub><sup>25</sup> = -4.67 (c = 0.05, CH<sub>2</sub>Cl<sub>2</sub>).

**HPLC Condition:** The enantiomeric excess was determined by HPLC analysis on a Daicel Chiralcel IC, Hexanes/IPA = 80/20, 1.0 mL/min, λ = 254 nm, *t* (minor) = 6.484 min, *t* (major) = 8.689 min.

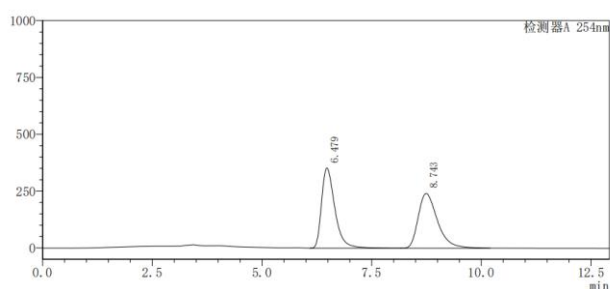

| Peak | Ret. Time | Area    | Height | Area%  |
|------|-----------|---------|--------|--------|
| 1    | 6.479     | 7443266 | 352736 | 50.253 |
| 2    | 8.743     | 7368270 | 241062 | 49.747 |

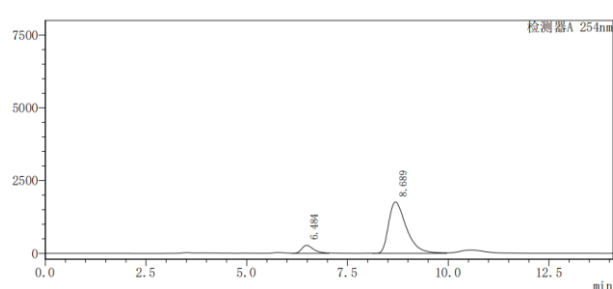

| Peak | Ret. Time | Area     | Height  | Area%  |
|------|-----------|----------|---------|--------|
| 1    | 6.484     | 5820531  | 278505  | 9.674  |
| 2    | 8.689     | 54347056 | 1763336 | 90.326 |

**(S<sub>a</sub>)-4-(2-(tert-butyl)-4,6-dimethylphenoxy)-3-(hydroxydiphenylmethyl)isoquinolin-1(2H)-one (3zl)**

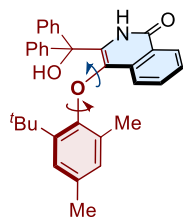

(PE:EA = 4:1) White solid. (45.4 mg, 90% yield, 27% ee). mp: 117–118 °C.

**<sup>1</sup>H NMR** (600 MHz, DMSO) δ 10.02 (s, 1H), 8.28 (d, *J* = 8.0 Hz, 1H), 7.58 (d, *J* = 7.8 Hz, 2H), 7.45 – 7.32 (m, 7H), 7.29 (s, 1H), 7.19 (t, *J* = 7.3 Hz, 1H), 7.13 (t, *J* = 7.6 Hz, 2H), 6.99 – 6.90 (m, 2H), 6.31 (s, 1H), 2.12 (s, 3H), 1.01 (s, 9H), 0.38 (s, 3H).

**<sup>13</sup>C NMR** (151 MHz, DMSO) δ 158.9, 150.8, 142.7, 141.8, 137.8, 133.2, 131.5, 131.0, 130.9, 130.8, 129.0, 128.4, 128.2, 127.9, 127.6, 127.2, 127.1, 126.5, 126.4, 125.9, 124.8, 120.8, 77.4, 34.5, 29.6, 20.3, 15.9.

**HRMS** (ESI): *m/z* [M+K]<sup>+</sup> calcd for [C<sub>34</sub>H<sub>33</sub>KNO<sub>3</sub>]<sup>+</sup> required 542.2098, found 542.2090.

[α]<sub>D</sub><sup>25</sup> = -31.33 (c = 0.05, CH<sub>2</sub>Cl<sub>2</sub>).

**HPLC Condition:** The enantiomeric excess was determined by HPLC analysis on a Daicel Chiralcel IC, Hexanes/IPA = 80/20, 1.0 mL/min, λ = 254 nm, *t* (minor) = 8.220 min, *t* (major) = 6.835 min.

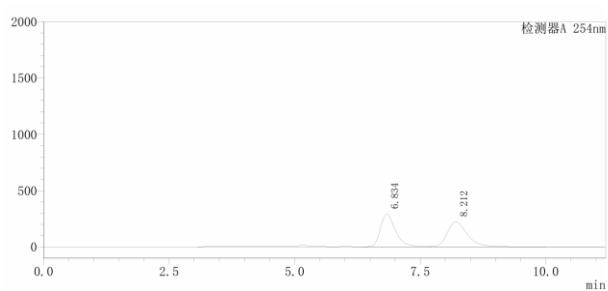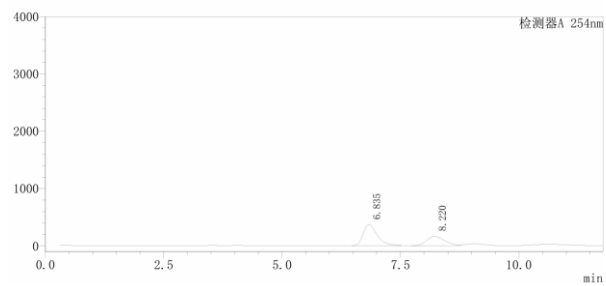

| Peak | Ret. Time | Area    | Height | Area%  |
|------|-----------|---------|--------|--------|
| 1    | 6.834     | 6129910 | 291023 | 49.770 |
| 2    | 8.212     | 6186537 | 220891 | 50.230 |

| Peak | Ret. Time | Area    | Height | Area%  |
|------|-----------|---------|--------|--------|
| 1    | 6.835     | 7692724 | 369173 | 63.704 |
| 2    | 8.220     | 4382941 | 163621 | 36.296 |

**(*S*<sub>a</sub>)-4-((3-(tert-butyl)-5-methyl-[1,1'-biphenyl]-2-yl)oxy)-3-(1-hydroxy-1-phenylethyl)isoquinolin-1(2H)-one**  
**(3zm)**

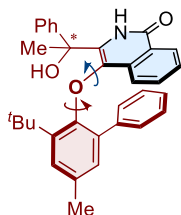

(PE:EA = 4:1) White solid. (43.9 mg, 87% yield, 83% ee, 8:1 dr). mp: 121–122 °C.

<sup>1</sup>H NMR (600 MHz, CDCl<sub>3</sub>) δ 8.78 (s, 1H), 8.19 – 8.15 (m, 1H), 7.35 (dd, *J* = 8.6, 5.6 Hz, 4H), 7.28 – 7.21 (m, 4H), 7.12 – 6.96 (m, 2H), 6.86 (s, 2H), 6.62 (s, 3H), 4.62 (s, 1H), 2.31 (s, 3H), 1.91 (s, 3H), 1.27 (s, 9H).

<sup>13</sup>C NMR (151 MHz, CDCl<sub>3</sub>) δ 160.5, 150.1, 146.7, 139.3, 138.2, 133.7, 133.4, 132.3 (2C), 132.2, 131.7, 131.0, 130.0, 128.5, 128.2, 128.1, 127.9, 126.7, 126.5, 126.4, 125.4, 125.0, 122.1, 75.7, 35.3, 30.6, 28.6, 20.9.

HRMS (ESI): *m/z* [M+K]<sup>+</sup> calcd for [C<sub>34</sub>H<sub>33</sub>KNO<sub>3</sub>]<sup>+</sup> required 542.2098, found 542.2088.

[α]<sub>D</sub><sup>25</sup> = -3.33 (c = 0.05, CH<sub>2</sub>Cl<sub>2</sub>).

**HPLC Condition:** The enantiomeric excess was determined by HPLC analysis on a Daicel Chiralcel IC, Hexanes/IPA = 80/20, 1.0 mL/min, λ = 254 nm, *t* (minor) = 7.225 min, *t* (major) = 6.189 min. The dr value was determined by <sup>1</sup>HNMR

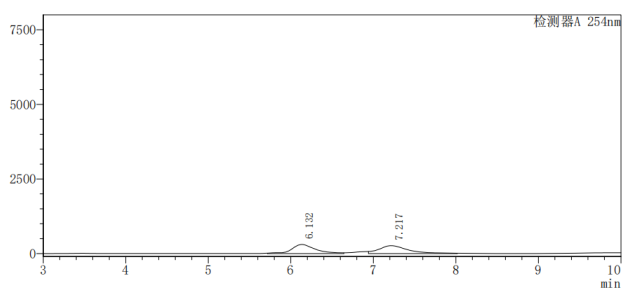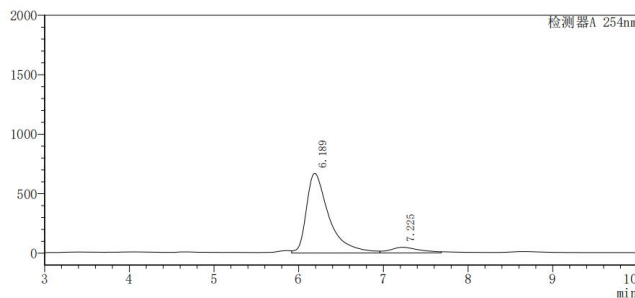

| Peak | Ret. Time | Area    | Height | Area%  |
|------|-----------|---------|--------|--------|
| 1    | 6.132     | 6125473 | 304803 | 48.378 |
| 2    | 7.217     | 6536318 | 264251 | 51.622 |

| Peak | Ret. Time | Area     | Height | Area%  |
|------|-----------|----------|--------|--------|
| 1    | 6.189     | 12436623 | 669676 | 91.466 |
| 2    | 7.225     | 1160410  | 47373  | 8.534  |

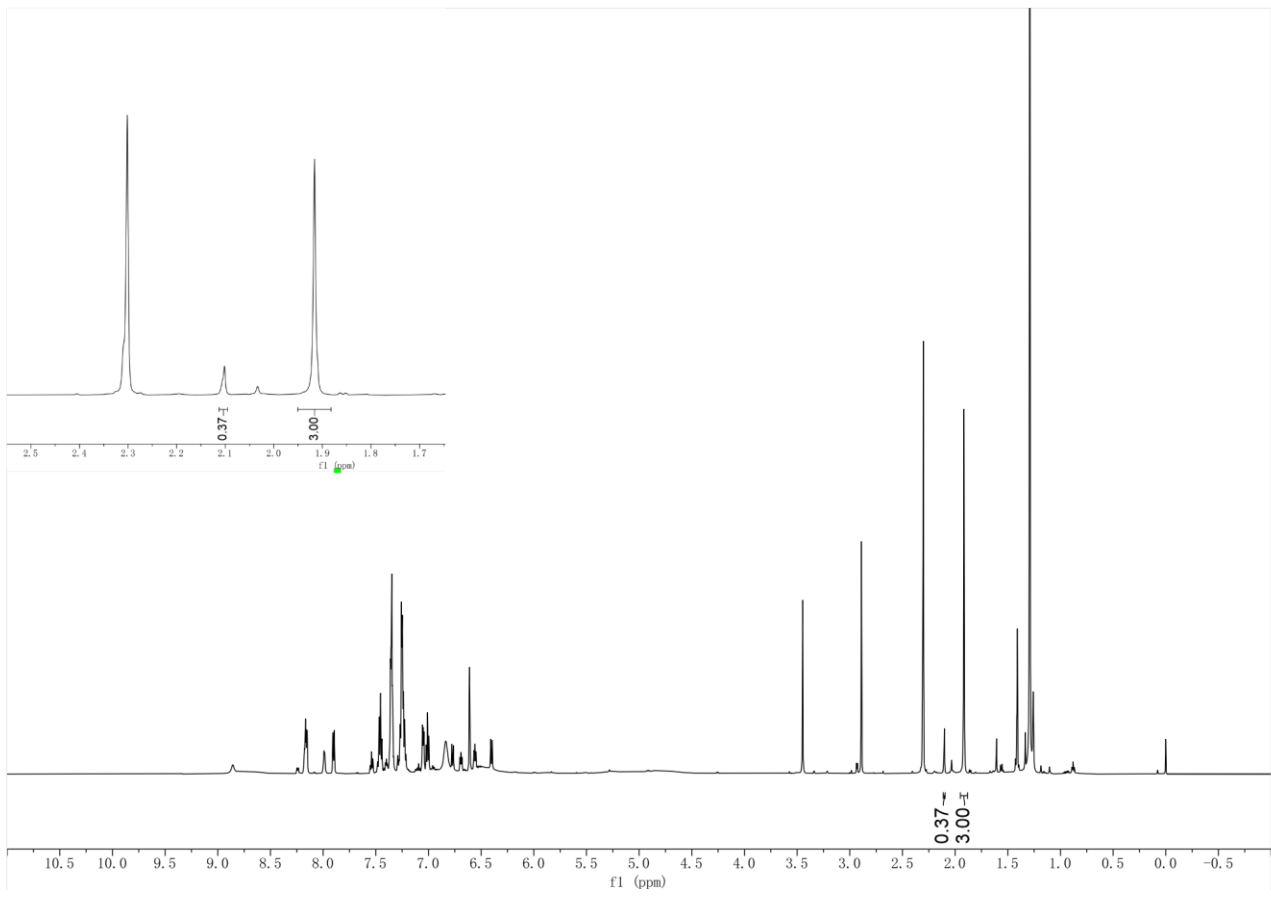

**(S<sub>a</sub>)-4-((3-(tert-butyl)-5-methyl-[1,1'-biphenyl]-2-yl)oxy)-3-(trimethylsilyl)isoquinolin-1(2H)-one (3zn)**

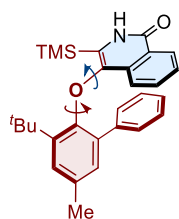

(PE:EA = 4:1) White solid. (16.0 mg, 35% yield, 82% ee). mp: 124–125 °C.

**<sup>1</sup>H NMR** (600 MHz, CDCl<sub>3</sub>) δ 8.22 (d, *J* = 7.4 Hz, 1H), 7.65 (s, 1H), 7.40 – 7.36 (m, 2H), 7.31 (s, 1H), 7.07 (d, *J* = 7.7 Hz, 1H), 7.01 (t, *J* = 7.5 Hz, 1H), 6.84 (t, *J* = 7.5 Hz, 2H), 6.62 (s, 1H), 6.46 (s, 2H), 2.33 (s, 3H), 1.58 (s, 9H), 0.39 (s, 9H).

**<sup>13</sup>C NMR** (151 MHz, CDCl<sub>3</sub>) δ 151.4, 142.8, 139.1, 139.0, 133.3, 132.2, 131.9, 131.6, 131.5, 129.9, 129.3, 128.2, 128.1, 126.8, 126.7, 126.4, 122.2, 35.8, 30.9, 21.0, -0.88.

**HRMS** (ESI): *m/z* [M+H]<sup>+</sup> calcd for [C<sub>29</sub>H<sub>34</sub>NO<sub>2</sub>Si]<sup>+</sup> required 456.2359, found 456.2358.

[α]<sub>D</sub><sup>25</sup> = -3.67 (c = 0.05, CH<sub>2</sub>Cl<sub>2</sub>).

**HPLC Condition:** The enantiomeric excess was determined by HPLC analysis on a Daicel Chiralcel IC, Hexanes/IPA = 90/10, 1.0 mL/min, λ = 254 nm, *t* (minor) = 9.221 min, *t* (major) = 9.888 min.

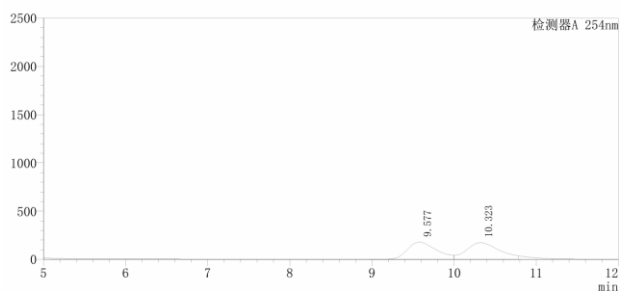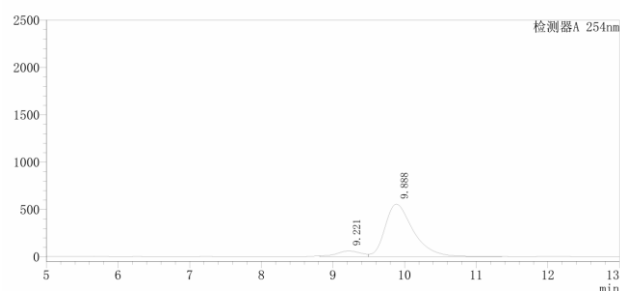

| Peak | Ret. Time | Area    | Height | Area%  |
|------|-----------|---------|--------|--------|
| 1    | 9.577     | 4455184 | 179548 | 47.874 |
| 2    | 10.323    | 4850793 | 174495 | 52.126 |

| Peak | Ret. Time | Area     | Height | Area%  |
|------|-----------|----------|--------|--------|
| 1    | 9.221     | 1497977  | 61444  | 8.881  |
| 2    | 9.888     | 15369711 | 555374 | 91.119 |

**(*S*<sub>a</sub>)-4-((3-(tert-butyl)-5-methyl-[1,1'-biphenyl]-2-yl)oxy)-2-(methyl(pyridin-2-yl)amino)-3-(trimethylsilyl)isoquinolin-1(2H)-one (3zn')**

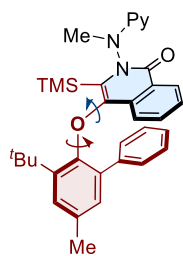

(PE:EA = 4:1) White solid. (11.8 mg, 21% yield, single diastereomer, 99% ee). mp: 134–135 °C.

<sup>1</sup>H NMR (600 MHz, CDCl<sub>3</sub>) δ 8.31 – 8.20 (m, 2H), 7.42 (p, *J* = 7.1 Hz, 2H), 7.36 (d, *J* = 9.6 Hz, 2H), 7.31 (d, *J* = 8.0 Hz, 1H), 7.09 (t, *J* = 7.5 Hz, 1H), 6.96 (t, *J* = 8.0 Hz, 2H), 6.71 (t, *J* = 6.1 Hz, 1H), 6.55 (d, *J* = 49.7 Hz, 3H), 6.11 (s, 1H), 3.28 (s, 3H), 2.33 (s, 3H), 1.61 (s, 9H), 0.29 (s, 9H).

<sup>13</sup>C NMR (151 MHz, CDCl<sub>3</sub>) δ 160.1, 159.9, 151.5, 148.0, 142.8, 139.9, 138.6, 137.6, 137.5, 133.3, 132.4, 132.0, 131.6, 131.5, 130.1, 128.8, 128.6, 127.1, 127.0, 126.8, 126.7, 122.9, 115.5, 107.7, 39.4, 36.0, 31.4, 20.9, 2.7.

HRMS (ESI): *m/z* [M+H]<sup>+</sup> calcd for [C<sub>35</sub>H<sub>40</sub>N<sub>3</sub>O<sub>2</sub>Si]<sup>+</sup> required 562.2890, found 562.2893.

[α]<sub>D</sub><sup>25</sup> = -4.67 (c = 0.5, CH<sub>2</sub>Cl<sub>2</sub>).

**HPLC Condition:** The enantiomeric excess was determined by HPLC analysis on a Daicel Chiralcel IC, Hexanes/IPA = 80/20, 1.0 mL/min, λ = 254 nm, *t* (minor) = 19.884 min, *t* (major) = 35.215 min.

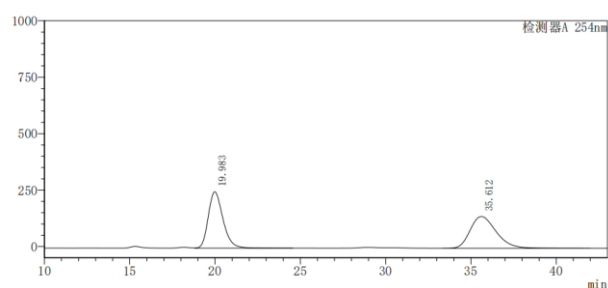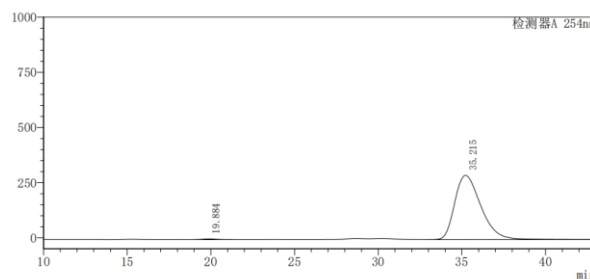

| Peak | Ret. Time | Area     | Height | Area%  |
|------|-----------|----------|--------|--------|
| 1    | 19.983    | 15010191 | 249849 | 50.033 |
| 2    | 35.612    | 14990145 | 141100 | 49.967 |

| Peak | Ret. Time | Area     | Height | Area%  |
|------|-----------|----------|--------|--------|
| 1    | 19.884    | 185393   | 3175   | 0.582  |
| 2    | 35.215    | 31674649 | 291207 | 99.418 |

**4-((3,5-dimethyl-[1,1'-biphenyl]-2-yl)oxy)-3-(hydroxydiphenylmethyl)isoquinolin-1(2H)-one (3zo)**

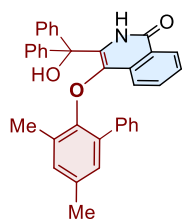

(PE:EA = 4:1) White solid. (43.4 mg, 83% yield, racemic). mp: 124–125 °C.

**<sup>1</sup>H NMR** (600 MHz, CDCl<sub>3</sub>) δ 8.43 (s, 1H), 8.25 (d, *J* = 7.0 Hz, 1H), 7.43 – 7.37 (m, 2H), 7.33 – 7.22 (m, 11H), 7.10 (t, *J* = 7.4 Hz, 1H), 7.00 (t, *J* = 7.6 Hz, 2H), 6.89 (d, *J* = 7.4 Hz, 2H), 6.83 (s, 1H), 6.74 (s, 1H), 4.32 (s, 1H), 2.26 (s, 3H), 1.58 (s, 3H).

**<sup>13</sup>C NMR** (151 MHz, CDCl<sub>3</sub>) δ 160.3, 149.1, 142.9, 142.7, 138.3, 134.1, 133.6, 132.5, 132.3, 131.9, 130.7, 130.2, 129.5, 128.7, 128.6, 128.5, 128.4, 128.3, 128.1, 127.7, 127.4, 127.0, 126.9, 126.7, 125.3, 121.3, 80.4, 20.5, 17.5.

**HRMS** (ESI): *m/z* [M+K]<sup>+</sup> calcd for [C<sub>36</sub>H<sub>29</sub>NNaO<sub>3</sub>]<sup>+</sup> required 546.2045, found 546.2052.

**HPLC Condition:** The enantiomeric excess was determined by HPLC analysis on a Daicel Chiralcel AD-H, Hexanes/IPA = 96/4, 0.8 mL/min, λ = 254 nm, *t* (minor) = 21.120 min, *t* (major) = 23.276 min.

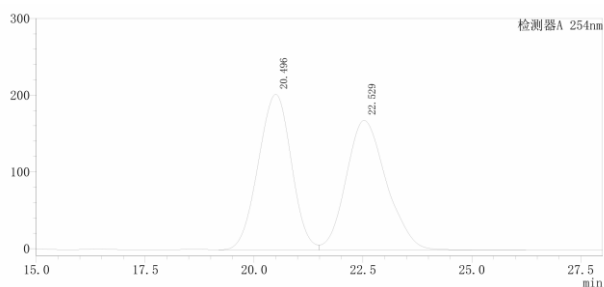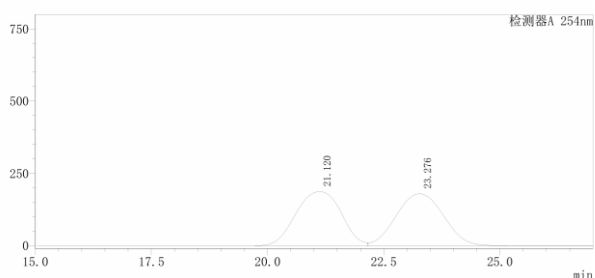

| Peak | Ret. Time | Area     | Height | Area%  |
|------|-----------|----------|--------|--------|
| 1    | 20.496    | 10762675 | 203081 | 49.714 |
| 2    | 22.529    | 10886563 | 169197 | 50.286 |

| Peak | Ret. Time | Area     | Height | Area%  |
|------|-----------|----------|--------|--------|
| 1    | 21.120    | 12865327 | 188497 | 49.736 |
| 2    | 23.276    | 13001751 | 180999 | 50.264 |

**(*S*<sub>a,C-O</sub>,*S*<sub>a,C-N</sub>)-4-((3-(tert-butyl)-5-methyl-[1,1'-biphenyl]-2-yl)oxy)-2-(7-methylquinolin-8-yl)-3-(trimethylsilyl)isoquinolin-1(2H)-one (5a)**

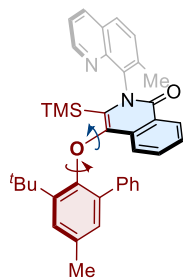

(PE:EA = 2:1) White solid. (51.3 mg, 86% yield, 19:1 dr, 99% ee). mp: 166–167 °C.

<sup>1</sup>H NMR (600 MHz, CDCl<sub>3</sub>) δ 8.69 (dd, *J* = 4.2, 1.7 Hz, 1H), 8.37 – 8.30 (m, 1H), 8.09 (dd, *J* = 8.2, 1.7 Hz, 1H), 7.76 (d, *J* = 8.5 Hz, 1H), 7.43 (ddd, *J* = 9.2, 7.1, 3.4 Hz, 3H), 7.36 (d, *J* = 2.4 Hz, 1H), 7.29 – 7.26 (m, 1H), 7.26 – 7.22 (m, 1H), 7.08 (tt, *J* = 7.4, 1.3 Hz, 1H), 6.96 (d, *J* = 8.7 Hz, 2H), 6.56 (d, *J* = 2.3 Hz, 3H), 2.34 (s, 3H), 2.05 (s, 3H), 1.63 (s, 9H), -0.29 (s, 9H).

<sup>13</sup>C NMR (151 MHz, CDCl<sub>3</sub>) δ 161.4, 151.2, 150.7, 145.4, 143.6, 139.9, 139.8, 139.2, 137.2, 135.7, 134.5, 133.1, 132.9, 132.5, 131.5, 131.0, 130.0, 129.4, 129.0, 128.4, 128.2, 127.7, 126.9, 126.8, 126.8, 126.5, 122.6, 120.9, 35.9, 31.0, 20.9, 19.7, 1.9.

HRMS (ESI): *m/z* [M+H]<sup>+</sup> calcd for [C<sub>39</sub>H<sub>41</sub>N<sub>2</sub>O<sub>2</sub>Si]<sup>+</sup> required 597.2937, found 597.2966.

[α]<sub>D</sub><sup>20</sup> = -36.67 (c = 0.05, CH<sub>2</sub>Cl<sub>2</sub>).

**HPLC Condition:** The enantiomeric excess and dr value were determined by HPLC analysis on a Daicel Chiralcel AD-H, Hexanes/IPA = 94/6, 1.0 mL/min, λ = 254 nm, *t* (minor) = 11.724 min, *t* (major) = 9.670 min.

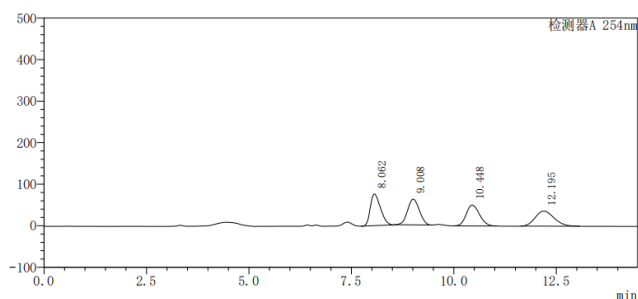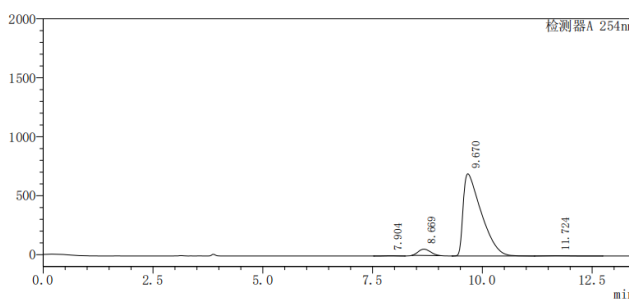

| Peak | Ret. Time | Area    | Height | Area%  |
|------|-----------|---------|--------|--------|
| 1    | 8.062     | 1311582 | 76253  | 27.067 |
| 2    | 9.008     | 1241730 | 62093  | 25.626 |
| 3    | 10.448    | 1132267 | 50457  | 23.367 |
| 4    | 12.195    | 1160039 | 36429  | 23.940 |

| Peak | Ret. Time | Area     | Height | Area%  |
|------|-----------|----------|--------|--------|
| 1    | 7.904     | 25664    | 2403   | 0.121  |
| 2    | 8.669     | 1030602  | 53640  | 4.869  |
| 3    | 9.670     | 20022539 | 696924 | 94.591 |
| 4    | 11.724    | 87512    | 2293   | 0.413  |

(*S*<sub>a,C-O</sub>,*S*<sub>a,C-N</sub>)-4-((3-(tert-butyl)-5-methyl-[1,1'-biphenyl]-2-yl)oxy)-6-fluoro-2-(7-methylquinolin-8-yl)-3-(trimethylsilyl)isoquinolin-1(2H)-one (**5b**)

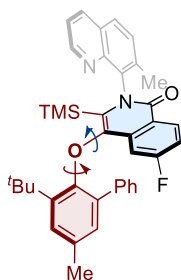

(PE:EA = 2:1) White solid. (56.5 mg, 92% yield, 15:1 dr, 99% ee). mp: 116–117 °C.

<sup>1</sup>H NMR (600 MHz, CDCl<sub>3</sub>) δ 8.69 (dd, *J* = 4.2, 1.7 Hz, 1H), 8.34 (dd, *J* = 8.8, 6.0 Hz, 1H), 8.09 (dd, *J* = 8.2, 1.7 Hz, 1H), 7.77 (d, *J* = 8.4 Hz, 1H), 7.44 (d, *J* = 8.4 Hz, 1H), 7.37 (d, *J* = 2.4 Hz, 1H), 7.28 (dd, *J* = 8.2, 4.2 Hz, 1H), 7.15 – 7.09 (m, 2H), 7.00 (t, *J* = 7.6 Hz, 2H), 6.85 (dd, *J* = 11.4, 2.5 Hz, 1H), 6.82 – 6.21 (m, 3H), 2.35 (s, 3H), 2.06 (s, 3H), 1.63 (s, 9H), -0.28 (s, 9H).

<sup>13</sup>C NMR (151 MHz, CDCl<sub>3</sub>) δ 165.2 (d, <sup>1</sup>*J*<sub>C-F</sub> = 250.4 Hz), 160.8, 150.8, 150.6, 145.3, 142.8 (d, <sup>4</sup>*J*<sub>C-F</sub> = 3.2 Hz), 139.8 (2C), 139.2, 136.9, 136.4, 135.7, 135.2 (d, <sup>3</sup>*J*<sub>C-F</sub> = 10.1 Hz), 132.9, 132.4, 132.1 (d, <sup>3</sup>*J*<sub>C-F</sub> = 10.0 Hz), 132.0, 130.0, 129.3, 128.6, 128.3, 127.7, 127.0, 126.9, 123.0, 121.0, 115.4 (d, <sup>2</sup>*J*<sub>C-F</sub> = 23.4 Hz), 108.3 (d, <sup>2</sup>*J*<sub>C-F</sub> = 25.3 Hz), 35.9, 31.0, 20.9, 19.6, 1.9.

<sup>19</sup>F NMR (565 MHz, CDCl<sub>3</sub>) δ -106.3, -106.8.

HRMS (ESI): *m/z* [M+K]<sup>+</sup> calcd for [C<sub>39</sub>H<sub>39</sub>FKN<sub>2</sub>O<sub>2</sub>Si]<sup>+</sup> required 653.2402, found 653.2387.

[α]<sub>D</sub><sup>20</sup> = +86.67 (c = 0.05, CH<sub>2</sub>Cl<sub>2</sub>).

**HPLC Condition:** The enantiomeric excess and dr value were determined by HPLC analysis on a Daicel Chiralcel AD-H, Hexanes/IPA = 94/6, 1.0 mL/min, λ = 254 nm, *t* (minor) = 11.061 min, *t* (major) = 8.863 min.

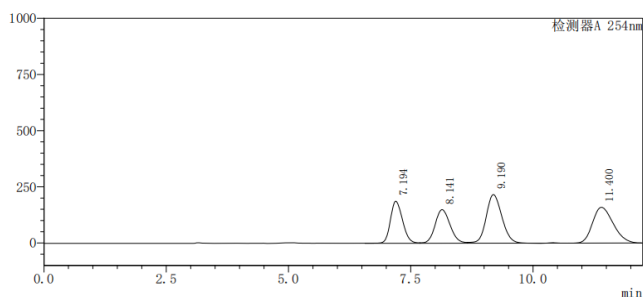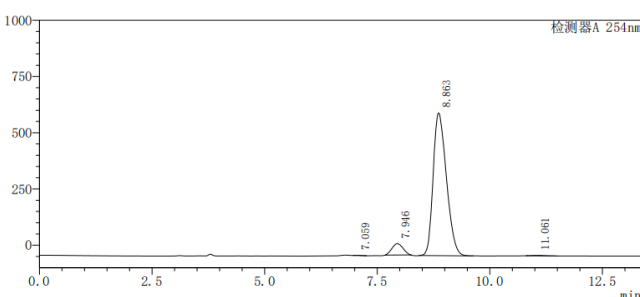

| Peak | Ret. Time | Area    | Height | Area%  |
|------|-----------|---------|--------|--------|
| 1    | 7.194     | 3232728 | 187306 | 20.276 |
| 2    | 8.141     | 3189038 | 149623 | 20.002 |
| 3    | 9.190     | 4851429 | 216516 | 30.428 |
| 4    | 11.400    | 4670512 | 159490 | 29.294 |

| Peak | Ret. Time | Area     | Height | Area%  |
|------|-----------|----------|--------|--------|
| 1    | 7.059     | 9097     | 950    | 0.065  |
| 2    | 7.946     | 859944   | 50379  | 6.179  |
| 3    | 8.863     | 13008161 | 634070 | 93.465 |
| 4    | 11.061    | 40465    | 1971   | 0.291  |

**(*S*<sub>a,C-O</sub>,*S*<sub>a,C-N</sub>)-4-((3-(tert-butyl)-5-methyl-[1,1'-biphenyl]-2-yl)oxy)-6-chloro-2-(7-methylquinolin-8-yl)-3-(trimethylsilyl)isoquinolin-1(2H)-one (5c)**

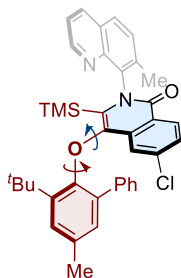

(PE:EA = 2:1) White solid. (57.4 mg, 91% yield, 12:1 dr, 99% ee). mp: 121–123 °C.

**<sup>1</sup>H NMR** (600 MHz, CDCl<sub>3</sub>) δ 8.68 (dd, *J* = 4.2, 1.7 Hz, 1H), 8.23 (d, *J* = 8.5 Hz, 1H), 8.09 (dd, *J* = 8.2, 1.7 Hz, 1H), 7.77 (d, *J* = 8.4 Hz, 1H), 7.44 (d, *J* = 8.5 Hz, 1H), 7.39 – 7.34 (m, 2H), 7.28 (dd, *J* = 8.2, 4.2 Hz, 1H), 7.17 (d, *J* = 1.9 Hz, 1H), 7.10 (tt, *J* = 7.4, 1.3 Hz, 1H), 7.04 – 6.95 (m, 2H), 6.60 (dd, *J* = 2.4, 0.7 Hz, 3H), 2.35 (s, 3H), 2.05 (s, 3H), 1.62 (s, 9H), -0.30 (s, 9H).

**<sup>13</sup>C NMR** (151 MHz, CDCl<sub>3</sub>) δ 160.9, 150.8 (2C), 145.2, 142.5, 139.8 (2C), 139.3, 137.7, 136.9, 136.5, 135.8, 134.1, 132.9, 132.4, 132.1, 130.7, 130.1, 129.4, 128.5, 128.3, 127.7, 127.2, 127.0, 126.9, 124.7, 122.4, 121.0, 35.9, 31.0, 20.9, 19.6, 1.9.

**HRMS** (ESI): *m/z* [M+Na]<sup>+</sup> calcd for [C<sub>39</sub>H<sub>39</sub>ClN<sub>2</sub>NaO<sub>2</sub>Si]<sup>+</sup> required 653.2367, found 653.2388.

[α]<sub>D</sub><sup>20</sup> = -213.33 (c = 0.05, CH<sub>2</sub>Cl<sub>2</sub>).

**HPLC Condition:** The enantiomeric excess and dr value were determined by HPLC analysis on a Daicel Chiralcel AD-H, Hexanes/IPA = 94/6, 1.0 mL/min, λ = 254 nm. *t* (minor) = 10.368 min, *t* (major) = 9.016 min.

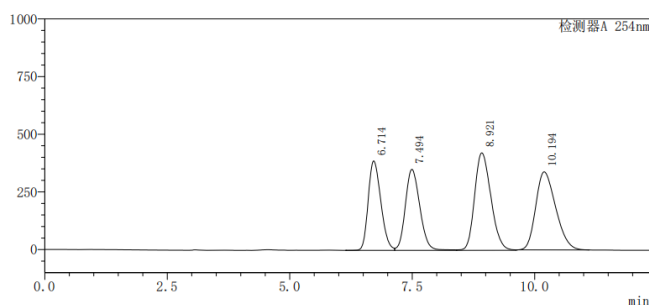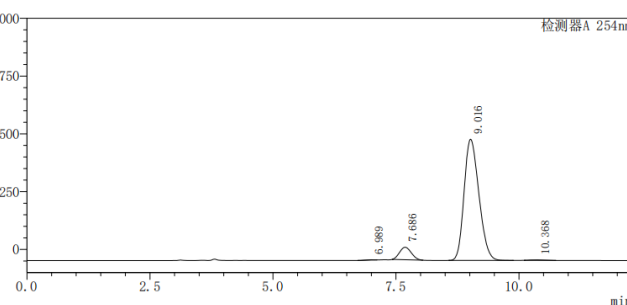

| Peak | Ret. Time | Area    | Height | Area%  |
|------|-----------|---------|--------|--------|
| 1    | 6.714     | 6953506 | 387878 | 20.752 |
| 2    | 7.494     | 7209642 | 351532 | 21.517 |
| 3    | 8.921     | 9773228 | 422796 | 29.168 |
| 4    | 10.194    | 9570740 | 338536 | 28.563 |

| Peak | Ret. Time | Area     | Height | Area%  |
|------|-----------|----------|--------|--------|
| 1    | 6.989     | 14394    | 1281   | 0.121  |
| 2    | 7.686     | 893352   | 53966  | 7.485  |
| 3    | 9.016     | 10982393 | 524637 | 92.022 |
| 4    | 10.368    | 44331    | 2204   | 0.371  |

**(*S*<sub>a,C-O</sub>,*S*<sub>a,C-N</sub>)-6-bromo-4-((3-(tert-butyl)-5-methyl-[1,1'-biphenyl]-2-yl)oxy)-2-(7-methylquinolin-8-yl)-3-(trimethylsilyl)isoquinolin-1(2H)-one (5d)**

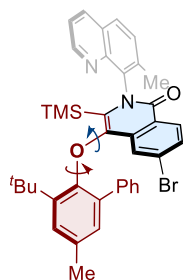

(PE:EA = 2:1) White solid. (57.8 mg, 86% yield, 13:1 dr, 99% ee). mp: 140–141 °C.

<sup>1</sup>H NMR (600 MHz, CDCl<sub>3</sub>) δ 8.68 (dd, *J* = 4.2, 1.7 Hz, 1H), 8.15 (d, *J* = 8.5 Hz, 1H), 8.09 (dd, *J* = 8.2, 1.7 Hz, 1H), 7.77 (d, *J* = 8.4 Hz, 1H), 7.51 (dd, *J* = 8.5, 1.8 Hz, 1H), 7.44 (d, *J* = 8.5 Hz, 1H), 7.38 (d, *J* = 2.3 Hz, 1H), 7.34 (d, *J* = 1.8 Hz, 1H), 7.28 (dd, *J* = 8.2, 4.1 Hz, 1H), 7.10 (tt, *J* = 7.5, 1.3 Hz, 1H), 6.99 (t, *J* = 7.6 Hz, 2H), 6.61 (d, *J* = 2.3 Hz, 3H), 2.36 (s, 3H), 2.05 (s, 3H), 1.62 (s, 9H), -0.30 (s, 9H).

<sup>13</sup>C NMR (151 MHz, CDCl<sub>3</sub>) δ 161.0, 150.8, 145.2, 142.4, 139.8, 139.8, 139.4, 136.9, 136.4, 135.8, 134.2, 132.9, 132.5, 132.2, 130.7, 130.1, 129.9, 129.4, 128.5, 128.3, 127.7, 127.0 (2C), 126.3, 125.6, 125.0, 121.0, 35.9, 31.0, 20.9, 19.6, 1.9.

HRMS (ESI): *m/z* [M+K]<sup>+</sup> calcd for [C<sub>39</sub>H<sub>39</sub>BrKN<sub>2</sub>O<sub>2</sub>Si]<sup>+</sup> required 713.1601, found 713.1577.

[α]<sub>D</sub><sup>20</sup> = -176.67 (c = 0.05, CH<sub>2</sub>Cl<sub>2</sub>).

**HPLC Condition:** The enantiomeric excess and dr value were determined by HPLC analysis on a Daicel Chiralcel AD-H, Hexanes/IPA = 94/6, 1.0 mL/min, λ = 254 nm. *t* (minor) = 10.901 min, *t* (major) = 9.745 min.

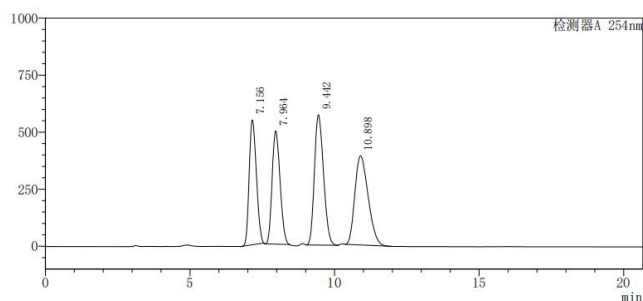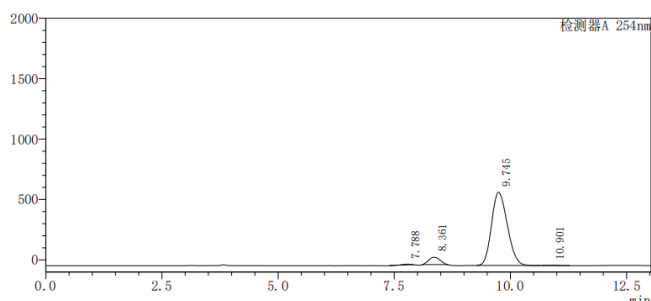

| Peak | Ret. Time | Area     | Height | Area%  |
|------|-----------|----------|--------|--------|
| 1    | 7.156     | 9467564  | 547749 | 21.502 |
| 2    | 7.964     | 9540158  | 496597 | 21.667 |
| 3    | 9.442     | 12542487 | 571223 | 28.486 |
| 4    | 10.898    | 12480575 | 391021 | 28.345 |

| Peak | Ret. Time | Area     | Height | Area%  |
|------|-----------|----------|--------|--------|
| 1    | 7.788     | 68616    | 5042   | 0.444  |
| 2    | 8.361     | 1037184  | 61322  | 6.709  |
| 3    | 9.745     | 14313688 | 606043 | 92.583 |
| 4    | 10.901    | 40903    | 2098   | 0.265  |

(*S*<sub>a,C-O</sub>,*S*<sub>a,C-N</sub>)-4-((3-(tert-butyl)-5-methyl-[1,1'-biphenyl]-2-yl)oxy)-6-iodo-2-(7-methylquinolin-8-yl)-3-(trimethylsilyl)isoquinolin-1(2H)-one (5e)

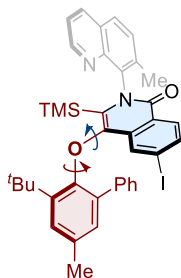

(PE:EA = 2:1) White solid. (62.2 mg, 86% yield, 13:1 dr, 98% ee). mp: 177–178 °C.

<sup>1</sup>H NMR (600 MHz, CDCl<sub>3</sub>) δ 8.70 (dd, *J* = 4.2, 1.8 Hz, 1H), 8.09 (dd, *J* = 8.2, 1.7 Hz, 1H), 7.99 (d, *J* = 8.4 Hz, 1H), 7.77 (d, *J* = 8.4 Hz, 1H), 7.70 (dd, *J* = 8.4, 1.6 Hz, 1H), 7.54 (d, *J* = 1.7 Hz, 1H), 7.44 (d, *J* = 8.5 Hz, 1H), 7.39 (d, *J* = 2.4 Hz, 1H), 7.28 (dd, *J* = 8.2, 4.2 Hz, 1H), 7.10 (t, *J* = 7.4 Hz, 1H), 7.00 (t, *J* = 7.6 Hz, 2H), 6.73 – 6.30 (m, 3H), 2.37 (s, 3H), 2.04 (s, 3H), 1.63 (s, 9H), -0.29 (s, 9H).

<sup>13</sup>C NMR (151 MHz, CDCl<sub>3</sub>) δ 161.1, 150.9, 150.8, 145.2, 142.3, 139.8 (2C), 139.5, 136.9, 136.1, 135.8, 135.4, 134.1, 132.8, 132.6, 132.3, 132.1, 130.4, 130.1, 129.4, 128.4, 128.3, 127.7, 127.0 (2C), 125.4, 121.0, 98.8, 35.9, 31.0, 20.9, 19.6, 1.9.

HRMS (ESI): *m/z* [M+K]<sup>+</sup> calcd for [C<sub>39</sub>H<sub>39</sub>IKN<sub>2</sub>O<sub>2</sub>Si]<sup>+</sup> required 761.1463, found 761.1433.

[α]<sub>D</sub><sup>20</sup> = -210 (c = 0.05, CH<sub>2</sub>Cl<sub>2</sub>).

**HPLC Condition:** The enantiomeric excess and dr value were determined by HPLC analysis on a Daicel Chiralcel AD-H, Hexanes/IPA = 94/6, 1.0 mL/min, λ = 254 nm. *t* (minor) = 10.368 min, *t* (major) = 9.016 min.

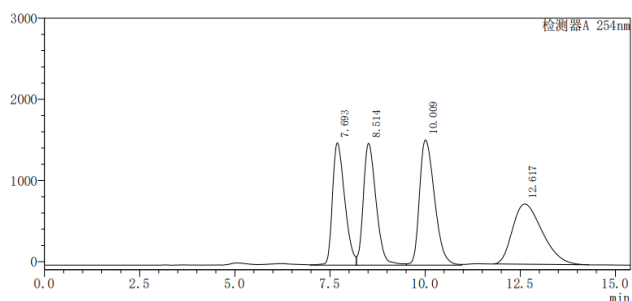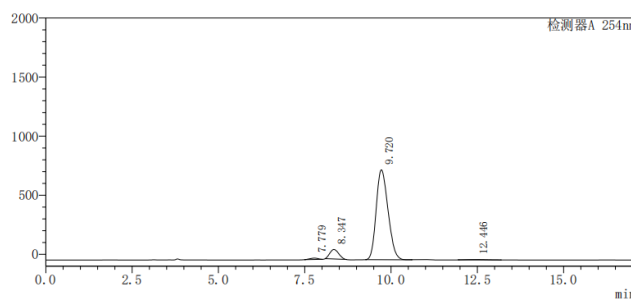

| Peak | Ret. Time | Area     | Height  | Area%  |
|------|-----------|----------|---------|--------|
| 1    | 7.693     | 33829474 | 1507260 | 22.307 |
| 2    | 8.514     | 35076100 | 1501774 | 23.129 |
| 3    | 10.009    | 42422276 | 1542729 | 27.973 |
| 4    | 12.617    | 40328575 | 742165  | 26.592 |

| Peak | Ret. Time | Area     | Height | Area%  |
|------|-----------|----------|--------|--------|
| 1    | 7.779     | 183041   | 11283  | 0.922  |
| 2    | 8.347     | 1426992  | 80316  | 7.188  |
| 3    | 9.720     | 18124644 | 760346 | 91.300 |
| 4    | 12.446    | 116993   | 3078   | 0.589  |

**(*S*<sub>a,C-O</sub>,*S*<sub>a,C-N</sub>)-4-((3-(tert-butyl)-5-methyl-[1,1'-biphenyl]-2-yl)oxy)-6-methyl-2-(7-methylquinolin-8-yl)-3-(trimethylsilyl)isoquinolin-1(2H)-one (5f)**

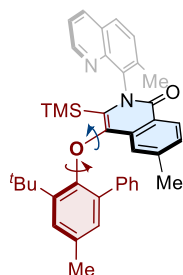

(PE:EA = 2:1) White solid. (51.9 mg, 85% yield, 12:1 dr, 96% ee). mp: 208–209 °C.

<sup>1</sup>H NMR (600 MHz, CDCl<sub>3</sub>) δ 8.70 (dd, *J* = 4.2, 1.8 Hz, 1H), 8.09 (dd, *J* = 8.2, 1.7 Hz, 1H), 7.99 (d, *J* = 8.4 Hz, 1H), 7.77 (d, *J* = 8.4 Hz, 1H), 7.70 (dd, *J* = 8.4, 1.6 Hz, 1H), 7.54 (d, *J* = 1.7 Hz, 1H), 7.44 (d, *J* = 8.5 Hz, 1H), 7.39 (d, *J* = 2.4 Hz, 1H), 7.28 (dd, *J* = 8.2, 4.2 Hz, 1H), 7.10 (t, *J* = 7.4 Hz, 1H), 7.00 (t, *J* = 7.6 Hz, 2H), 6.73 – 6.30 (m, 3H), 2.37 (s, 3H), 2.04 (s, 3H), 1.63 (s, 9H), -0.29 (s, 9H).

<sup>13</sup>C NMR (151 MHz, CDCl<sub>3</sub>) δ 161.4, 151.3, 150.7, 145.4, 143.6, 141.2, 139.9 (2C), 139.3, 137.2, 135.7, 134.4, 133.1, 132.7, 132.6, 131.5, 130.0, 129.3, 128.9, 128.3, 128.1 (2C), 127.7, 126.9, 126.8, 124.3, 122.7, 120.9, 35.9, 31.0, 22.2, 20.9, 19.6, 1.9.

HRMS (ESI): *m/z* [M+Na]<sup>+</sup> calcd for [C<sub>40</sub>H<sub>42</sub>N<sub>2</sub>NaO<sub>2</sub>Si]<sup>+</sup> required 633.2913, found 633.3004.

[α]<sub>D</sub><sup>20</sup> = -100 (c = 0.05, CH<sub>2</sub>Cl<sub>2</sub>).

**HPLC Condition:** The enantiomeric excess value was determined by HPLC analysis on a Daicel Chiralcel AD-H, Hexanes/IPA = 94/6, 1.0 mL/min, λ = 254 nm. *t* (minor) = 10.272 min, *t* (major) = 8.375 min. The dr value was determined by <sup>1</sup>HNMR.

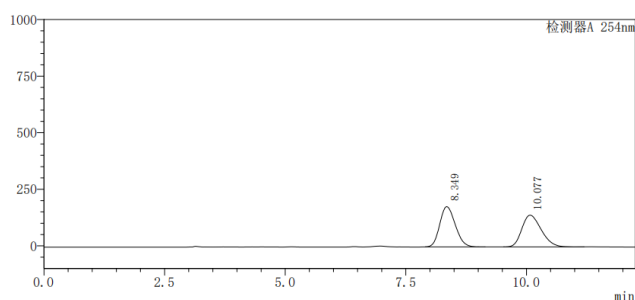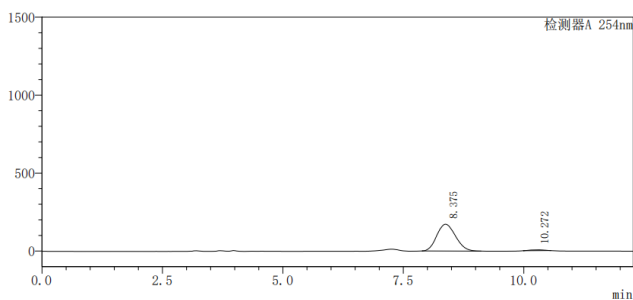

| Peak | Ret. Time | Area    | Height | Area%  |
|------|-----------|---------|--------|--------|
| 1    | 8.349     | 3980590 | 177945 | 50.471 |
| 2    | 10.077    | 3906348 | 140320 | 49.529 |

| Peak | Ret. Time | Area    | Height | Area%  |
|------|-----------|---------|--------|--------|
| 1    | 8.375     | 4638272 | 171846 | 97.711 |
| 2    | 10.272    | 108676  | 5372   | 2.289  |

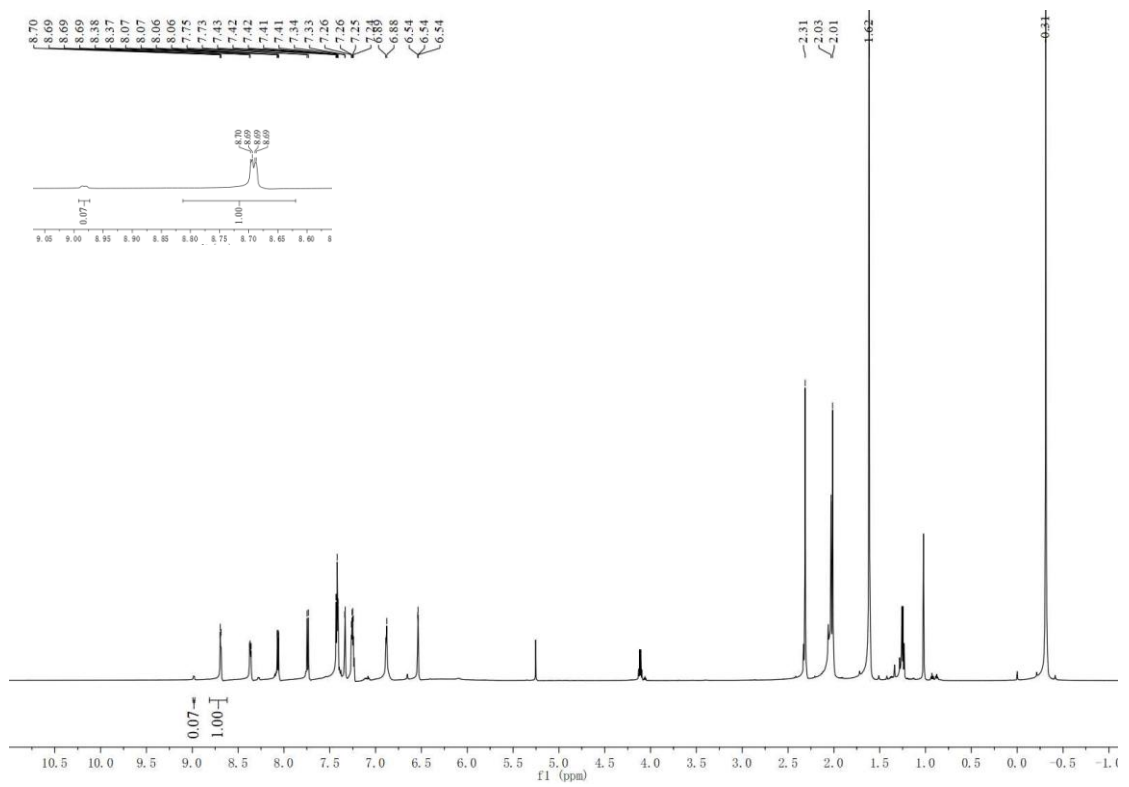

(*S*<sub>a,C-O</sub>,*S*<sub>a,C-N</sub>)-6-(tert-butyl)-4-((3-(tert-butyl)-5-methyl-[1,1'-biphenyl]-2-yl)oxy)-2-(7-methylquinolin-8-yl)-3-(trimethylsilyl)isoquinolin-1(2H)-one (5g)

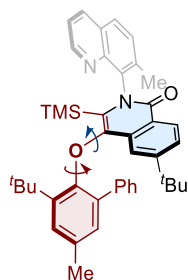

(PE:EA = 2:1) White solid. (53.5 mg, 86% yield, 16:1 dr, 99% ee). mp: 176–177 °C.

<sup>1</sup>H NMR (600 MHz, CDCl<sub>3</sub>) δ 8.69 (dd, *J* = 4.2, 1.7 Hz, 1H), 8.24 (d, *J* = 8.4 Hz, 1H), 8.08 (dd, *J* = 8.2, 1.7 Hz, 1H), 7.75 (d, *J* = 8.4 Hz, 1H), 7.47 (dd, *J* = 8.4, 1.8 Hz, 1H), 7.43 (d, *J* = 8.4 Hz, 1H), 7.37 (d, *J* = 2.3 Hz, 1H), 7.29 – 7.26 (m, 1H), 7.23 (s, 1H), 7.07 (t, *J* = 7.4 Hz, 1H), 6.95 (s, 2H), 6.57 (d, *J* = 2.3 Hz, 3H), 2.31 (s, 3H), 2.02 (s, 3H), 1.64 (s, 9H), 1.12 (s, 9H), -0.29 (s, 9H).

<sup>13</sup>C NMR (151 MHz, CDCl<sub>3</sub>) δ 161.2, 154.0, 151.4, 150.7, 145.6, 144.0, 139.8 (2C), 139.5, 137.3, 135.7, 133.9, 133.0, 132.7, 132.4, 131.7, 129.9, 129.4, 128.8, 128.2, 128.1, 127.7, 126.9, 126.8, 124.6, 124.3, 120.9, 119.6, 35.9, 35.3, 31.0 (2C), 20.8, 19.6, 2.0.

HRMS (ESI): *m/z* [M+K]<sup>+</sup> calcd for [C<sub>43</sub>H<sub>48</sub>KN<sub>2</sub>O<sub>2</sub>Si]<sup>+</sup> required 691.3122, found 691.3070.

[α]<sub>D</sub><sup>20</sup> = -31.67 (c = 0.05, CH<sub>2</sub>Cl<sub>2</sub>).

**HPLC Condition:** The enantiomeric excess and dr value were determined by HPLC analysis on a Daicel Chiralcel AD-H, Hexanes/IPA = 94/6, 1.0 mL/min, λ = 254 nm. *t* (minor) = 10.488 min, *t* (major) = 9.490 min.

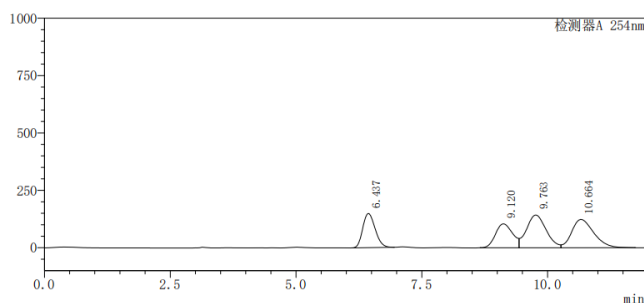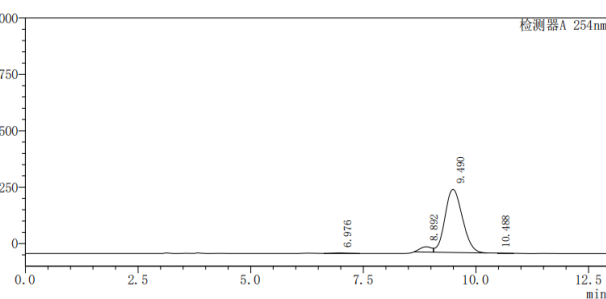

| Peak | Ret. Time | Area    | Height | Area%  |
|------|-----------|---------|--------|--------|
| 1    | 6.437     | 2551027 | 148796 | 20.191 |
| 2    | 9.120     | 2481812 | 104334 | 19.643 |
| 3    | 9.763     | 3851308 | 142680 | 30.482 |
| 4    | 10.664    | 3750355 | 123502 | 29.683 |

| Peak | Ret. Time | Area    | Height | Area%  |
|------|-----------|---------|--------|--------|
| 1    | 6.976     | 46993   | 2080   | 0.585  |
| 2    | 8.892     | 420634  | 23318  | 5.233  |
| 3    | 9.490     | 7546641 | 280009 | 93.887 |
| 4    | 10.488    | 23765   | 2125   | 0.296  |

**(*S*<sub>a,C-O</sub>,*S*<sub>a,C-N</sub>)-4-((3-(tert-butyl)-5-methyl-[1,1'-biphenyl]-2-yl)oxy)-6-methoxy-2-(7-methylquinolin-8-yl)-3-(trimethylsilyl)isoquinolin-1(2H)-one (5h)**

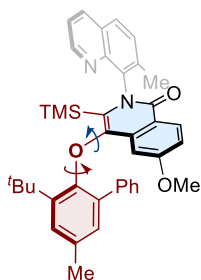

(PE:EA = 2:1) White solid. (57.0 mg, 91% yield, 16:1 dr, 99% ee). mp: 143–144 °C.

<sup>1</sup>H NMR (600 MHz, CDCl<sub>3</sub>) δ 8.69 (dd, *J* = 4.2, 1.7 Hz, 1H), 8.24 (dd, *J* = 8.8, 1.5 Hz, 1H), 8.08 (dd, *J* = 8.2, 1.7 Hz, 1H), 7.75 (d, *J* = 8.5 Hz, 1H), 7.43 (d, *J* = 8.4 Hz, 1H), 7.39 – 7.32 (m, 1H), 7.26 (dd, *J* = 8.1, 4.2 Hz, 1H), 7.11 (tq, *J* = 7.4, 1.3 Hz, 1H), 7.05 – 6.97 (m, 3H), 6.61 (ddd, *J* = 11.9, 2.5, 1.3 Hz, 4H), 3.44 (d, *J* = 0.9 Hz, 3H), 2.33 (s, 3H), 2.03 (s, 3H), 1.65 (s, 9H), -0.28 (s, 9H).

<sup>13</sup>C NMR (151 MHz, CDCl<sub>3</sub>) δ 161.5, 161.1, 151.2, 150.7, 145.5, 143.3, 139.8, 139.7, 139.4, 137.2, 135.7, 135.2, 134.5, 133.2, 132.8, 131.6, 130.8, 129.9, 129.3, 128.1, 128.0, 127.7, 127.0, 126.9, 120.8, 120.4, 117.1, 103.6, 55.0, 35.9, 31.1, 20.8, 19.6, 1.9.

HRMS (ESI): *m/z* [M+NH<sub>4</sub>]<sup>+</sup> calcd for [C<sub>40</sub>H<sub>46</sub>N<sub>3</sub>O<sub>3</sub>Si]<sup>+</sup> required 644.3308, found 644.3295.

[α]<sub>D</sub><sup>20</sup> = -216.67 (c = 0.05, CH<sub>2</sub>Cl<sub>2</sub>).

**HPLC Condition:** The enantiomeric excess value was determined by HPLC analysis on a Daicel Chiralcel AD-H, Hexanes/IPA = 94/6, 1.0 mL/min, λ = 254 nm. *t* (minor) = 12.984 min, *t* (major) = 9.412 min. The dr value was determined by <sup>1</sup>H NMR.

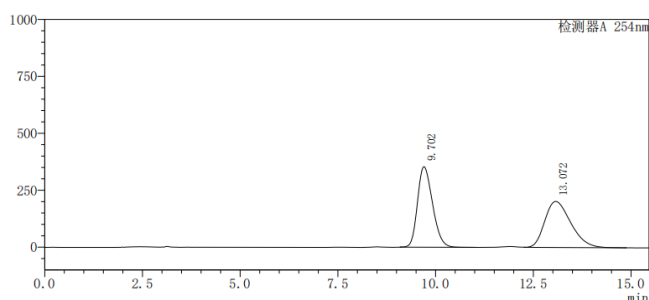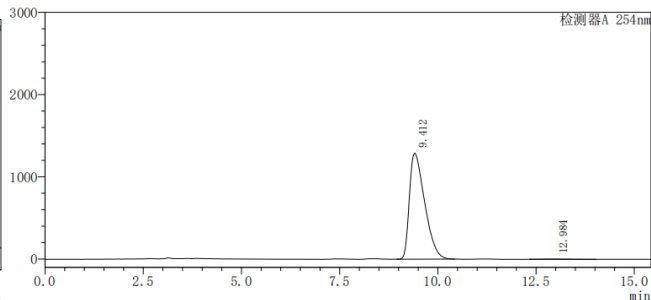

| Peak | Ret. Time | Area    | Height | Area%  |
|------|-----------|---------|--------|--------|
| 1    | 9.702     | 9428918 | 353581 | 50.268 |
| 2    | 13.072    | 9328455 | 202182 | 49.732 |

| Peak | Ret. Time | Area     | Height  | Area%  |
|------|-----------|----------|---------|--------|
| 1    | 9.412     | 34814914 | 1289486 | 99.547 |
| 2    | 12.984    | 158430   | 3630    | 0.453  |

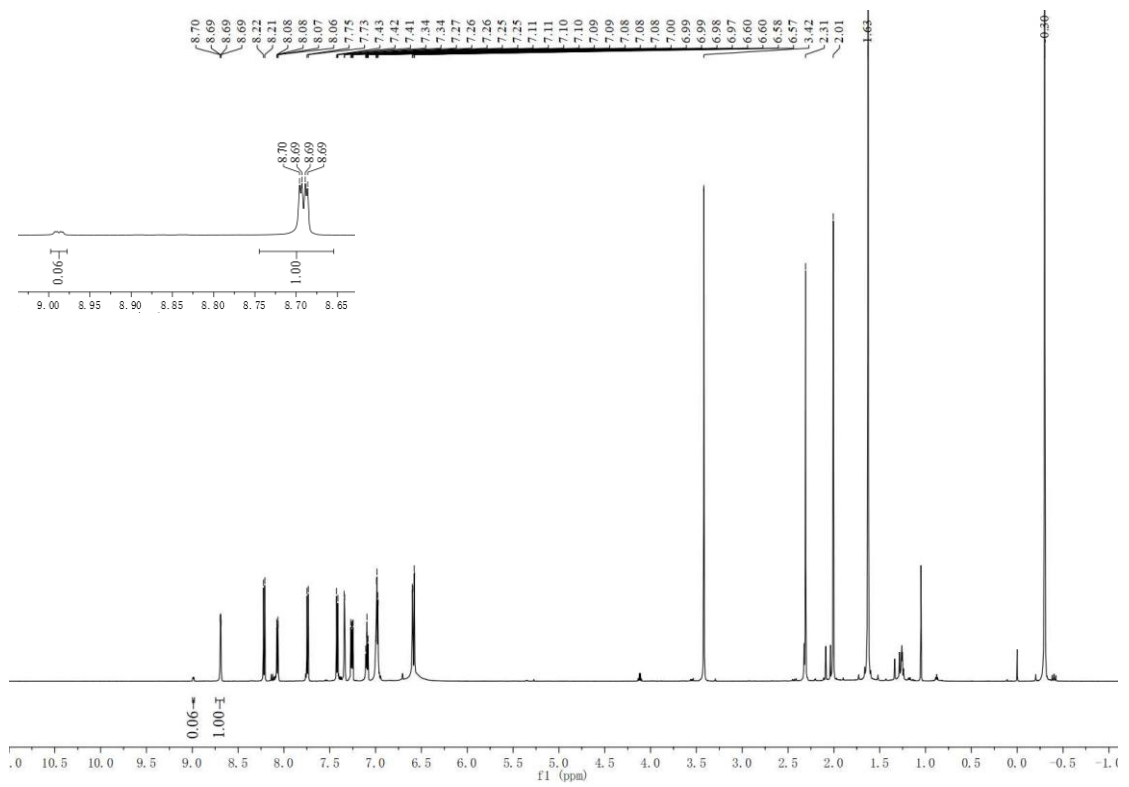

(*S*<sub>a,C-O</sub>,*S*<sub>a,C-N</sub>)-4-((3-(tert-butyl)-5-methyl-[1,1'-biphenyl]-2-yl)oxy)-2-(7-methylquinolin-8-yl)-6-(trifluoromethoxy)-3-(trimethylsilyl)isoquinolin-1(2H)-one (5i)

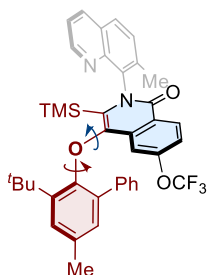

(PE:EA = 2:1) White solid. (61.3 mg, 90% yield, 17:1 dr, 99% ee). mp: 183–184 °C.

<sup>1</sup>H NMR (400 MHz, CDCl<sub>3</sub>) δ 8.73 (dd, *J* = 4.3, 1.8 Hz, 1H), 8.36 (d, *J* = 8.8 Hz, 1H), 8.10 (dd, *J* = 8.3, 1.9 Hz, 1H), 7.79 (d, *J* = 8.4 Hz, 1H), 7.49 – 7.43 (m, 1H), 7.39 (d, *J* = 2.6 Hz, 1H), 7.30 (dd, *J* = 8.2, 4.2 Hz, 1H), 7.22 (dd, *J* = 8.8, 2.5 Hz, 1H), 7.14 – 7.09 (m, 1H), 7.06 (s, 1H), 7.00 (t, *J* = 7.7 Hz, 2H), 6.62 (d, *J* = 2.6 Hz, 3H), 2.35 (s, 3H), 2.06 (s, 3H), 1.63 (s, 9H), -0.26 (s, 9H).

<sup>19</sup>F NMR (377 MHz, CDCl<sub>3</sub>) δ -57.6, -57.6.

<sup>13</sup>C NMR (101 MHz, CDCl<sub>3</sub>) δ 160.6, 151.2, 150.8, 150.5, 145.2, 142.8, 139.7, 139.3, 136.8, 136.6, 135.8, 134.3, 132.8, 132.4, 132.3, 131.6, 129.9, 129.4, 128.5, 128.4, 127.7, 127.0 (2C), 124.5, 121.6, 121.0(q, <sup>1</sup>*J*<sub>C-F</sub> = 258.9 Hz), 119.5, 113.0 (2C), 35.8, 30.8, 20.8, 19.6, 1.8.

HRMS (ESI): *m/z* [M+NH<sub>4</sub>]<sup>+</sup> calcd for [C<sub>40</sub>H<sub>43</sub>F<sub>3</sub>N<sub>3</sub>O<sub>3</sub>Si]<sup>+</sup> required 698.3026, found 698.3075.

[α]<sub>D</sub><sup>20</sup> = -176.67 (c = 0.05, CH<sub>2</sub>Cl<sub>2</sub>).

**HPLC Condition:** The enantiomeric excess and dr value were determined by HPLC analysis on a Daicel Chiralcel AD-H, Hexanes/IPA = 94/6, 1.0 mL/min, λ = 254 nm. *t* (minor) = 11.745 min, *t* (major) = 9.835 min.

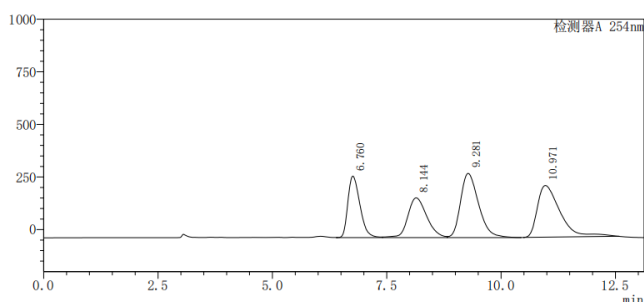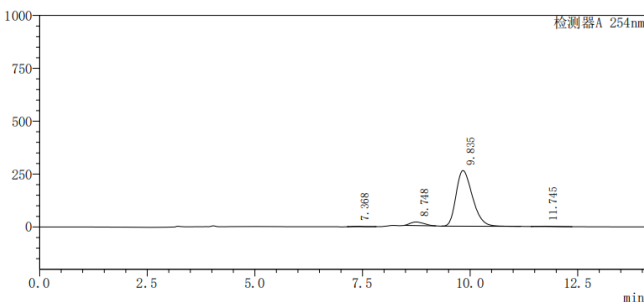

| Peak | Ret. Time | Area    | Height | Area%  |
|------|-----------|---------|--------|--------|
| 1    | 6.760     | 5366271 | 292497 | 19.424 |
| 2    | 8.144     | 5434581 | 189117 | 19.671 |
| 3    | 9.281     | 8381895 | 305127 | 30.340 |
| 4    | 10.971    | 8444152 | 246083 | 30.565 |

| Peak | Ret. Time | Area    | Height | Area%  |
|------|-----------|---------|--------|--------|
| 1    | 7.368     | 37115   | 2475   | 0.501  |
| 2    | 8.748     | 379569  | 17111  | 5.126  |
| 3    | 9.835     | 6953068 | 263284 | 93.891 |
| 4    | 11.745    | 35691   | 1348   | 0.482  |

**(*S*<sub>a,C-O</sub>,*S*<sub>a,C-N</sub>)-4-((3-(tert-butyl)-5-methyl-[1,1'-biphenyl]-2-yl)oxy)-2-(7-methylquinolin-8-yl)-1-oxo-3-(trimethylsilyl)-1,2-dihydroisoquinoline-6-carbonitrile (**5j**)**

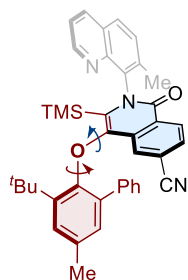

(PE:EA = 2:1) White solid. (59.6 mg, 96% yield, 13:1 dr, 99% ee). mp: 129–130 °C.

<sup>1</sup>H NMR (600 MHz, CDCl<sub>3</sub>) δ 8.67 (dd, *J* = 4.2, 1.7 Hz, 1H), 8.38 (d, *J* = 8.2 Hz, 1H), 8.10 (dd, *J* = 8.2, 1.7 Hz, 1H), 7.79 (d, *J* = 8.4 Hz, 1H), 7.60 (dd, *J* = 8.3, 1.5 Hz, 1H), 7.52 (d, *J* = 1.4 Hz, 1H), 7.46 (d, *J* = 8.5 Hz, 1H), 7.39 (d, *J* = 2.3 Hz, 1H), 7.30 (dd, *J* = 8.2, 4.2 Hz, 1H), 7.10 (tt, *J* = 6.3, 1.1 Hz, 1H), 7.03 – 6.95 (m, 2H), 6.81 – 6.39 (m, 3H), 2.36 (s, 3H), 2.08 (s, 3H), 1.63 (s, 9H), -0.28 (s, 9H).

<sup>13</sup>C NMR (151 MHz, CDCl<sub>3</sub>) δ 160.3, 150.9, 150.7, 145.0, 142.2, 139.7 (2C), 139.3, 137.7, 136.6, 135.8, 133.1, 133.0, 132.6, 132.1, 130.1, 130.0, 129.4, 128.9, 128.6, 128.5, 128.4, 127.7 (2C), 127.1, 127.0, 121.1, 118.5, 114.5, 35.9, 30.9, 20.9, 19.6, 1.8.

HRMS (ESI): *m/z* [M+K]<sup>+</sup> calcd for [C<sub>40</sub>H<sub>39</sub>KN<sub>3</sub>O<sub>2</sub>Si]<sup>+</sup> required 660.2449, found 660.2392.

[α]<sub>D</sub><sup>20</sup> = -260 (c = 0.05, CH<sub>2</sub>Cl<sub>2</sub>).

**HPLC Condition:** The enantiomeric excess and dr value were determined by HPLC analysis on a Daicel Chiralcel AD-H, Hexanes/IPA = 94/6, 1.0 mL/min, λ = 254 nm. *t* (minor) = 14.236 min, *t* (major) = 11.489 min.

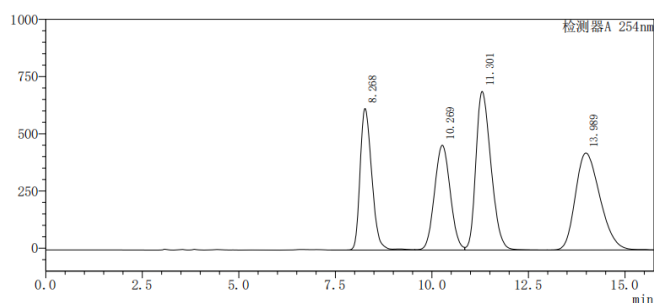

| Peak | Ret. Time | Area     | Height | Area%  |
|------|-----------|----------|--------|--------|
| 1    | 8.268     | 13019296 | 618766 | 20.503 |
| 2    | 10.269    | 12944943 | 458072 | 20.386 |
| 3    | 11.301    | 18784586 | 693069 | 29.582 |
| 4    | 13.989    | 18750329 | 423808 | 29.528 |

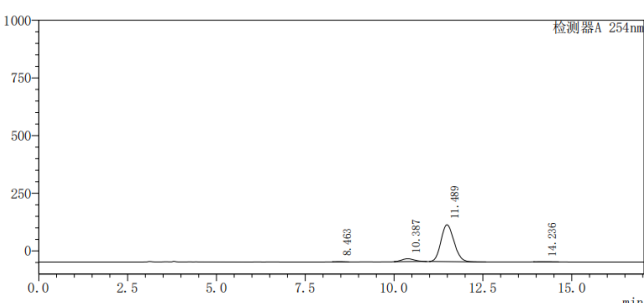

| Peak | Ret. Time | Area    | Height | Area%  |
|------|-----------|---------|--------|--------|
| 1    | 8.463     | 14638   | 981    | 0.334  |
| 2    | 10.387    | 304696  | 12579  | 6.943  |
| 3    | 11.489    | 4055304 | 159813 | 92.409 |
| 4    | 14.236    | 13788   | 543    | 0.314  |

(*S*<sub>a,C-O</sub>,*S*<sub>a,C-N</sub>)-4-((3-(tert-butyl)-5-methyl-[1,1'-biphenyl]-2-yl)oxy)-2-(7-methylquinolin-8-yl)-6-(trifluoromethyl)-3-(trimethylsilyl)isoquinolin-1(2H)-one (**5k**)

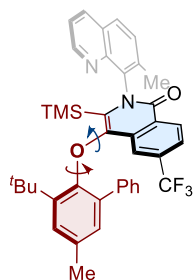

(PE:EA = 2:1) White solid. (59.8 mg, 90% yield, 16:1 dr, 99% ee). mp: 193–194 °C.

<sup>1</sup>H NMR (600 MHz, CDCl<sub>3</sub>) δ 8.69 (dd, *J* = 4.2, 1.7 Hz, 1H), 8.41 (d, *J* = 8.3 Hz, 1H), 8.10 (dd, *J* = 8.2, 1.8 Hz, 1H), 7.79 (d, *J* = 8.4 Hz, 1H), 7.61 (dd, *J* = 8.4, 1.8 Hz, 1H), 7.49 – 7.45 (m, 2H), 7.39 (d, *J* = 2.6 Hz, 1H), 7.29 (dd, *J* = 8.2, 4.2 Hz, 1H), 7.10 (ddd, *J* = 7.4, 6.2, 1.3 Hz, 1H), 6.99 (t, *J* = 7.6 Hz, 2H), 6.59 (d, *J* = 2.7 Hz, 3H), 2.34 (s, 3H), 2.07 (s, 3H), 1.63 (s, 9H), -0.26 (s, 9H).

<sup>13</sup>C NMR (151 MHz, CDCl<sub>3</sub>) δ 160.6, 150.9, 150.9, 145.2, 143.2, 139.7, 139.5, 136.8, 136.4, 135.8, 132.7, 132.6 (2C), 132.4, 130.0, 129.9, 129.4, 128.5, 128.4, 128.3, 127.7, 127.2, 127.1, 127.0, 124.8 (q, <sup>1</sup>*J*<sub>C-F</sub> = 273.0 Hz), 122.5, 121.1, 120.5, 35.9, 30.9, 20.8, 19.6, 1.8.

<sup>19</sup>F NMR (565 MHz, CDCl<sub>3</sub>) δ -63.43.

HRMS (ESI): *m/z* [M+NH<sub>4</sub>]<sup>+</sup> calcd for [C<sub>40</sub>H<sub>43</sub>F<sub>3</sub>N<sub>3</sub>O<sub>2</sub>Si]<sup>+</sup> required 682.3077, found 682.3008.

[α]<sub>D</sub><sup>20</sup> = -283.33 (*c* = 0.05, CH<sub>2</sub>Cl<sub>2</sub>).

**HPLC Condition:** The enantiomeric excess and dr value were determined by HPLC analysis on a Daicel Chiralcel AD-H, Hexanes/IPA = 94/6, 1.0 mL/min, λ = 254 nm. *t* (minor) = 9.471 min, *t* (major) = 8.055 min.

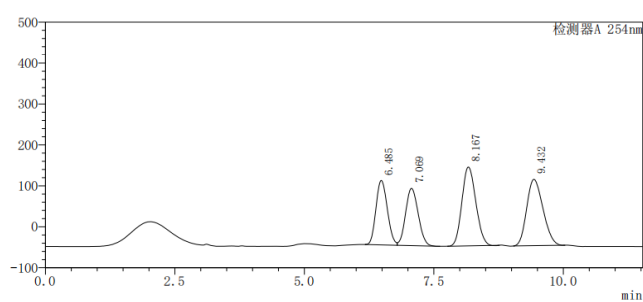

| Peak | Ret. Time | Area    | Height | Area%  |
|------|-----------|---------|--------|--------|
| 1    | 6.485     | 2400297 | 157539 | 20.165 |
| 2    | 7.069     | 2365052 | 139911 | 19.869 |
| 3    | 8.167     | 3598828 | 192878 | 30.234 |
| 4    | 9.432     | 3539229 | 162115 | 29.733 |

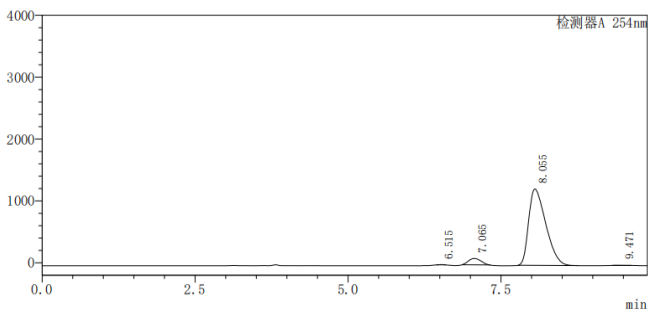

| Peak | Ret. Time | Area     | Height  | Area%  |
|------|-----------|----------|---------|--------|
| 1    | 6.515     | 16855    | 3233    | 0.066  |
| 2    | 7.065     | 1457288  | 103519  | 5.706  |
| 3    | 8.055     | 24033334 | 1233983 | 94.103 |
| 4    | 9.471     | 31953    | 2870    | 0.125  |

**(*S*<sub>a,C-O</sub>,*S*<sub>a,C-N</sub>)-4-((3-(tert-butyl)-5-methyl-[1,1'-biphenyl]-2-yl)oxy)-7-methyl-2-(7-methylquinolin-8-yl)-3-(trimethylsilyl)isoquinolin-1(2H)-one (5l)**

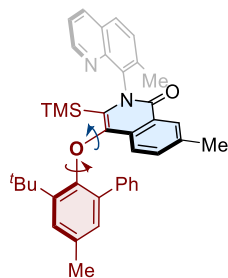

(PE:EA = 2:1) White solid. (40.9 mg, 67% yield, 16:1 dr, 99% ee). mp: 140–141 °C.

<sup>1</sup>H NMR (600 MHz, CDCl<sub>3</sub>) δ 8.68 (dd, *J* = 4.2, 1.7 Hz, 1H), 8.15 (t, *J* = 1.4 Hz, 1H), 8.08 (dd, *J* = 8.2, 1.7 Hz, 1H), 7.76 (d, *J* = 8.4 Hz, 1H), 7.43 (d, *J* = 8.5 Hz, 1H), 7.35 (d, *J* = 2.4 Hz, 1H), 7.28 – 7.26 (m, 1H), 7.26 – 7.24 (m, 1H), 7.12 (d, *J* = 8.5 Hz, 1H), 7.10 – 7.07 (m, 1H), 6.97 (t, *J* = 7.3 Hz, 2H), 6.56 (d, *J* = 2.3 Hz, 3H), 2.43 (s, 3H), 2.34 (s, 3H), 2.02 (s, 3H), 1.62 (s, 9H), -0.31 (s, 9H).

<sup>13</sup>C NMR (151 MHz, CDCl<sub>3</sub>) δ 161.4, 151.3, 150.7, 145.4, 144.0, 139.9, 139.8, 139.3, 137.3, 136.9, 135.7, 133.1, 132.8, 132.7, 132.5, 131.5, 130.9, 130.1, 129.4, 128.6, 128.3, 128.1, 127.7, 126.9, 126.8, 126.5, 122.6, 120.8, 35.9, 31.0, 21.5, 20.9, 19.6, 2.0.

HRMS (ESI): *m/z* [M+H]<sup>+</sup> calcd for [C<sub>40</sub>H<sub>43</sub>N<sub>2</sub>O<sub>2</sub>Si]<sup>+</sup> required 611.3094, found 611.3089.

[α]<sub>D</sub><sup>20</sup> = -206.67 (c = 0.05, CH<sub>2</sub>Cl<sub>2</sub>).

**HPLC Condition:** The enantiomeric excess and dr value were determined by HPLC analysis on a Daicel Chiralcel AD-H, Hexanes/IPA = 94/6, 1.0 mL/min, λ = 254 nm. *t* (minor) = 16.378 min, *t* (major) = 10.231 min.

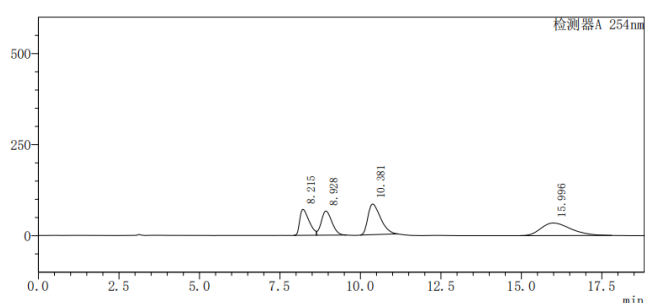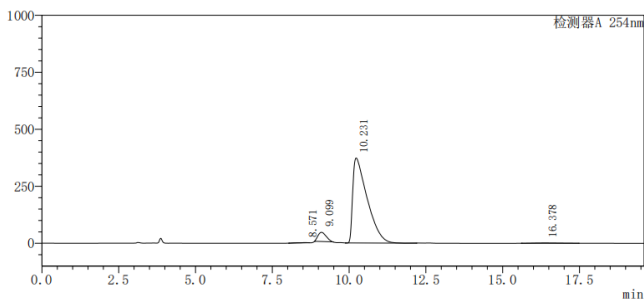

| Peak | Ret. Time | Area    | Height | Area%  |
|------|-----------|---------|--------|--------|
| 1    | 8.215     | 1440107 | 71480  | 19.231 |
| 2    | 8.928     | 1517422 | 66103  | 20.263 |
| 3    | 10.381    | 2304552 | 84198  | 30.774 |
| 4    | 15.996    | 2226446 | 34520  | 29.731 |

| Peak | Ret. Time | Area     | Height | Area%  |
|------|-----------|----------|--------|--------|
| 1    | 8.571     | 27303    | 1065   | 0.209  |
| 2    | 9.099     | 749450   | 40228  | 5.742  |
| 3    | 10.231    | 12198314 | 372731 | 93.466 |
| 4    | 16.378    | 75942    | 1346   | 0.582  |

**(*S*<sub>a,C-O</sub>,*S*<sub>a,C-N</sub>)-4-((3-(tert-butyl)-5-methyl-[1,1'-biphenyl]-2-yl)oxy)-6-(7-methylquinolin-8-yl)-5-(trimethylsilyl)thieno[2,3-c]pyridin-7(6H)-one (5m)**

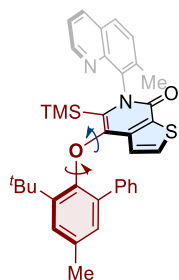

(PE:EA = 2:1) White solid. (34.3 mg, 57% yield, 13:1 dr, 99% ee). mp: 191–192 °C.

<sup>1</sup>H NMR (600 MHz, CDCl<sub>3</sub>) δ 8.73 (dd, *J* = 4.3, 1.8 Hz, 1H), 8.10 (dd, *J* = 8.2, 1.8 Hz, 1H), 7.77 (d, *J* = 8.3 Hz, 1H), 7.40 (dd, *J* = 21.7, 6.8 Hz, 2H), 7.34 (s, 1H), 7.30 (dd, *J* = 8.2, 4.1 Hz, 1H), 7.15 – 7.10 (m, 1H), 7.06 (t, *J* = 7.5 Hz, 2H), 6.74 (t, *J* = 5.2 Hz, 3H), 6.05 (d, *J* = 5.3 Hz, 1H), 2.39 (s, 3H), 1.92 (s, 3H), 1.55 (s, 9H), -0.30 (s, 9H).

<sup>13</sup>C NMR (151 MHz, CDCl<sub>3</sub>) δ 157.7, 150.8, 150.4, 145.6, 144.7, 141.7, 139.6, 139.4, 139.3, 136.9, 135.8, 135.2, 133.1 (2C), 132.9, 132.1, 131.6, 129.9, 129.4, 128.4, 127.9, 127.6, 127.2 (2C), 123.6, 121.0, 35.7, 31.0, 21.1, 19.2, 1.9.

HRMS (ESI): *m/z* [M+H]<sup>+</sup> calcd for [C<sub>37</sub>H<sub>39</sub>N<sub>2</sub>O<sub>2</sub>SSi]<sup>+</sup> required 603.2502, found 603.2494.

[α]<sub>D</sub><sup>20</sup> = -213.33 (c = 0.05, CH<sub>2</sub>Cl<sub>2</sub>).

**HPLC Condition:** The enantiomeric excess and dr value were determined by HPLC analysis on a Daicel Chiralcel IH-3, Hexanes/IPA = 94/6, 1.0 mL/min, λ = 254 nm. *t* (minor) = 14.009 min, *t* (major) = 22.771 min.

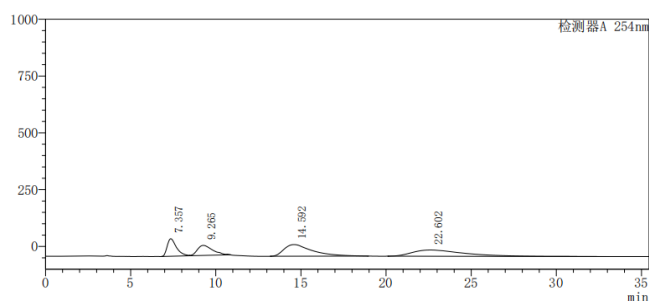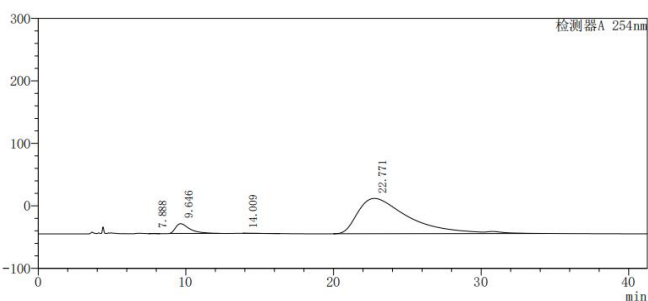

| Peak | Ret. Time | Area    | Height | Area%  |
|------|-----------|---------|--------|--------|
| 1    | 7.357     | 2938092 | 77141  | 16.729 |
| 2    | 9.265     | 2748265 | 44231  | 15.648 |
| 3    | 14.592    | 5937951 | 51248  | 33.810 |
| 4    | 22.602    | 5938368 | 27540  | 33.812 |

| Peak | Ret. Time | Area     | Height | Area%  |
|------|-----------|----------|--------|--------|
| 1    | 7.888     | 9105     | 422    | 0.062  |
| 2    | 9.646     | 1019173  | 15454  | 6.947  |
| 3    | 14.009    | 7527     | 32     | 0.051  |
| 4    | 22.771    | 13634486 | 56401  | 92.939 |

**(*S*<sub>a,C-O</sub>,*S*<sub>a,C-N</sub>)-4-((3-(tert-butyl)-5-methyl-[1,1'-biphenyl]-2-yl)oxy)-2-(7-isopropylquinolin-8-yl)-3-(trimethylsilyl)isoquinolin-1(2H)-one (5n)**

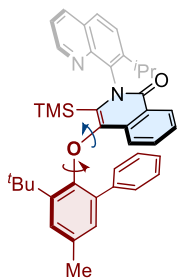

(PE:EA = 4:1) White solid. (52.5 mg, 84% yield, 9:1 dr, 99% ee). mp: 127–128 °C.

**<sup>1</sup>H NMR** (600 MHz, CDCl<sub>3</sub>) δ 8.66 (dd, *J* = 4.2, 1.7 Hz, 1H), 8.35 – 8.29 (m, 1H), 8.07 (dd, *J* = 8.1, 1.7 Hz, 1H), 7.84 (d, *J* = 8.7 Hz, 1H), 7.58 (d, *J* = 8.7 Hz, 1H), 7.44 – 7.39 (m, 2H), 7.35 (d, *J* = 2.3 Hz, 1H), 7.29 – 7.26 (m, 1H), 7.22 – 7.17 (m, 1H), 7.17 – 7.10 (m, 1H), 7.00 (s, 2H), 6.54 (d, *J* = 2.3 Hz, 2H), 2.49 (p, *J* = 6.8 Hz, 1H), 2.33 (s, 3H), 1.63 (s, 9H), 1.34 (d, *J* = 6.6 Hz, 3H), 1.26 (d, *J* = 6.7 Hz, 3H), -0.30 (s, 9H).

**<sup>13</sup>C NMR** (151 MHz, CDCl<sub>3</sub>) δ 161.9, 151.4, 150.6, 148.5, 145.5, 143.4, 140.1, 139.3, 135.9, 135.6, 135.3, 133.2, 132.9, 132.7, 131.5, 130.9, 130.0, 129.1, 128.7, 128.3, 127.6, 126.7, 126.6 (2C), 126.4, 125.3, 122.4, 121.0, 35.9, 30.9, 28.3, 24.1, 23.5, 20.9, 2.1.

**HRMS** (ESI): *m/z* [M+Na]<sup>+</sup> calcd for [C<sub>41</sub>H<sub>44</sub>N<sub>2</sub>NaO<sub>2</sub>Si]<sup>+</sup> required 647.3070, found 647.3008.

[α]<sub>D</sub><sup>20</sup> = +180 (c = 0.2, CH<sub>2</sub>Cl<sub>2</sub>).

**HPLC Condition:** The enantiomeric excess value was determined by HPLC analysis on a Daicel Chiralcel AD-H, Hexanes/IPA = 94/6, 1.0 mL/min, λ = 254 nm, *t* (minor) = 6.164 min, *t* (major) = 5.284 min. The dr value was determined by **<sup>1</sup>H NMR**.

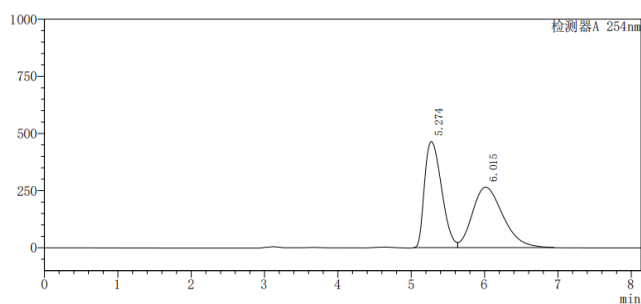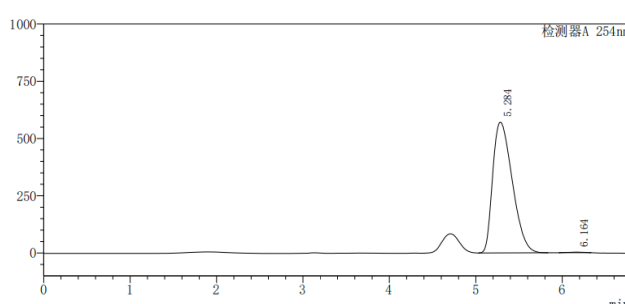

| Peak | Ret. Time | Area    | Height | Area%  |
|------|-----------|---------|--------|--------|
| 1    | 5.274     | 7487138 | 464081 | 49.489 |
| 2    | 6.015     | 7641844 | 264619 | 50.511 |

| Peak | Ret. Time | Area    | Height | Area%  |
|------|-----------|---------|--------|--------|
| 1    | 5.284     | 8984665 | 571287 | 99.681 |
| 2    | 6.164     | 28796   | 2280   | 0.319  |

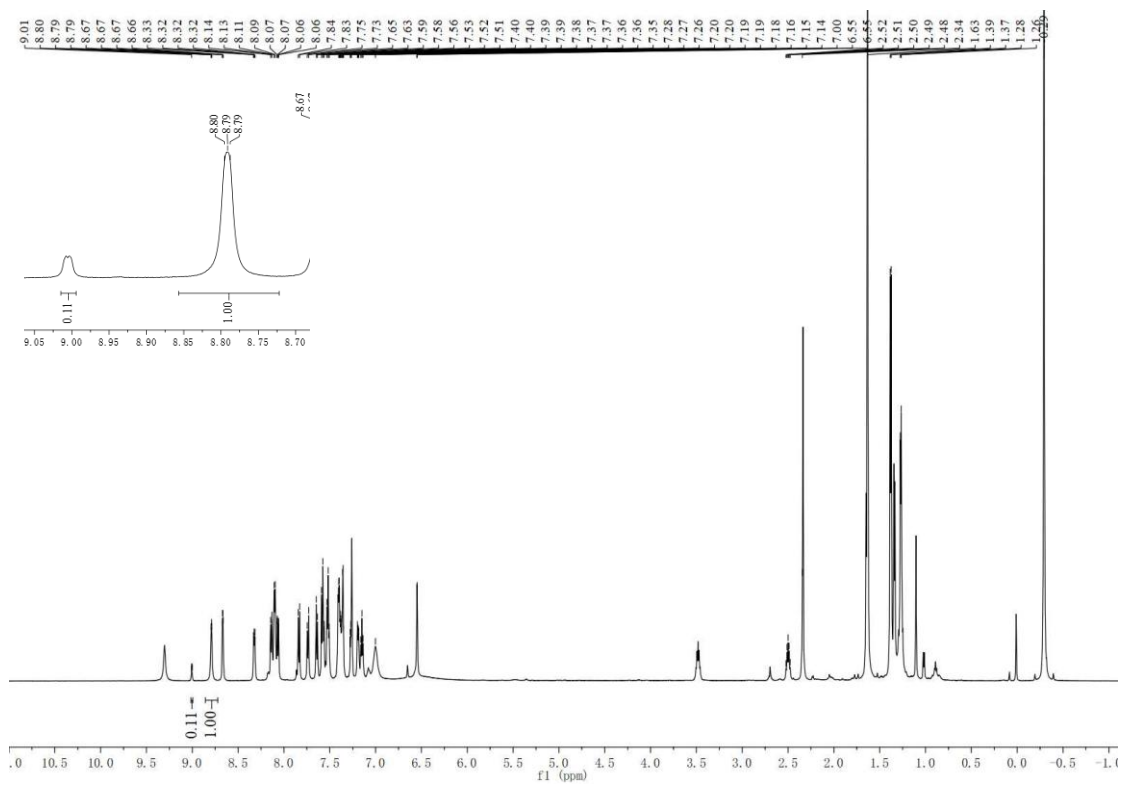

**(*S*<sub>a,C-O</sub>,*S*<sub>a,C-N</sub>)-4-((3-(tert-butyl)-5-methyl-[1,1'-biphenyl]-2-yl)oxy)-2-(7-butylquinolin-8-yl)-3-(trimethylsilyl)isoquinolin-1(2H)-one (5o)**

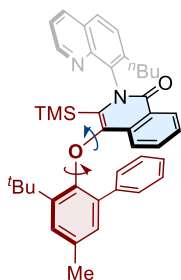

(PE:EA = 4:1) White solid. (59.5 mg, 93% yield, 11:1 dr, 99% ee). mp: 156–157 °C.

<sup>1</sup>H NMR (600 MHz, CDCl<sub>3</sub>) δ 8.73 – 8.59 (m, 1H), 8.34 – 8.27 (m, 1H), 8.07 (d, *J* = 8.2 Hz, 1H), 7.80 (d, *J* = 8.6 Hz, 1H), 7.58 – 7.52 (m, 2H), 7.43 – 7.39 (m, 2H), 7.36 (d, *J* = 1.9 Hz, 1H), 7.22 (dd, *J* = 5.6, 3.7 Hz, 1H), 7.12 (t, *J* = 7.6 Hz, 1H), 6.96 (t, *J* = 7.6 Hz, 2H), 6.58 (s, 3H), 2.47 (ddd, *J* = 15.2, 8.3, 6.4 Hz, 1H), 2.39 (q, *J* = 7.1 Hz, 1H), 2.34 (s, 3H), 1.90 – 1.78 (m, 2H), 1.62 (s, 9H), 1.56 (q, *J* = 7.9, 7.2 Hz, 2H), 1.08 (t, *J* = 7.3 Hz, 3H), -0.32 (s, 9H).

<sup>13</sup>C NMR (151 MHz, CDCl<sub>3</sub>) δ 161.7, 151.2, 150.6, 145.4, 143.6, 143.4, 139.9, 139.2, 137.0, 135.5, 134.9, 133.1, 132.8, 132.5, 131.5, 130.9, 130.1, 129.0, 128.8, 128.4, 128.1, 128.0, 127.2, 126.7 (2C), 126.6, 122.5, 120.9, 35.9, 31.0, 30.9 (2C), 23.1, 20.9, 14.6, 2.1.

HRMS (ESI): *m/z* [M+Na]<sup>+</sup> calcd for [C<sub>42</sub>H<sub>46</sub>N<sub>2</sub>NaO<sub>2</sub>Si]<sup>+</sup> required 661.3226, found 661.3262.

[α]<sub>D</sub><sup>20</sup> = -206.67 (c = 0.05, CH<sub>2</sub>Cl<sub>2</sub>).

**HPLC Condition:** The enantiomeric excess and dr value were determined by HPLC analysis on a Daicel Chiralcel AD-H, Hexanes/IPA = 94/6, 1.0 mL/min, λ = 254 nm, *t* (minor) = 6.897 min, *t* (major) = 5.998 min.

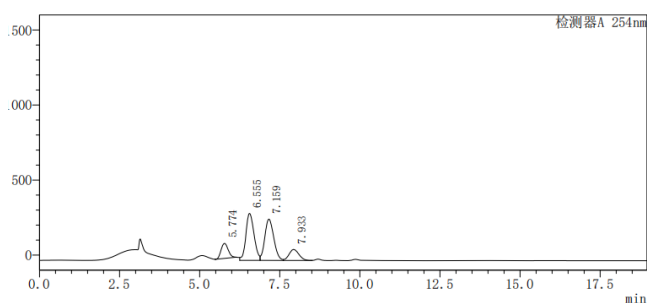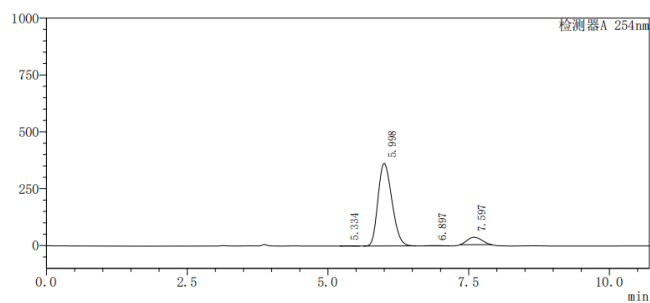

| Peak | Ret. Time | Area    | Height | Area%  |
|------|-----------|---------|--------|--------|
| 1    | 5.774     | 1529944 | 99503  | 10.932 |
| 2    | 6.555     | 5561315 | 313136 | 39.736 |
| 3    | 7.159     | 5345968 | 275125 | 38.198 |
| 4    | 7.933     | 1558281 | 73114  | 11.134 |

| Peak | Ret. Time | Area    | Height | Area%  |
|------|-----------|---------|--------|--------|
| 1    | 5.334     | 2507    | 230    | 0.037  |
| 2    | 5.998     | 6253377 | 362986 | 91.308 |
| 3    | 6.897     | 19892   | 1473   | 0.290  |
| 4    | 7.597     | 572891  | 32943  | 8.365  |

**(*S*<sub>a,C-O</sub>,*S*<sub>a,C-N</sub>)-2-(5-bromo-7-methylquinolin-8-yl)-4-((3-(tert-butyl)-5-methyl-[1,1'-biphenyl]-2-yl)oxy)-3-(trimethylsilyl)isoquinolin-1(2H)-one (5p)**

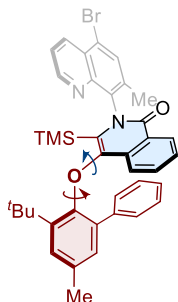

(PE:EA = 2:1) White solid. (50 mg, 74% yield, 57:1 dr, 95% ee). mp: 129–130 °C.

**<sup>1</sup>H NMR** (600 MHz, CDCl<sub>3</sub>) δ 8.70 (dd, *J* = 4.2, 1.6 Hz, 1H), 8.45 (dd, *J* = 8.5, 1.6 Hz, 1H), 8.38 – 8.20 (m, 1H), 7.76 (s, 1H), 7.47 – 7.40 (m, 2H), 7.38 (dd, *J* = 8.5, 4.2 Hz, 1H), 7.35 (d, *J* = 2.4 Hz, 1H), 7.26 – 7.22 (m, 1H), 7.09 – 7.05 (m, 1H), 6.95 (s, 2H), 6.55 (d, *J* = 2.3 Hz, 3H), 2.33 (s, 3H), 2.03 (s, 3H), 1.62 (s, 9H), -0.27 (s, 9H).

**<sup>13</sup>C NMR** (151 MHz, CDCl<sub>3</sub>) δ 161.4, 151.4, 151.2, 146.0, 143.7, 140.7, 139.9, 139.2, 137.2, 135.5, 134.2, 133.1, 132.9, 132.8, 132.5, 131.6, 131.2, 130.0, 129.0, 128.4, 127.0 (2C), 126.9, 126.8, 126.4, 122.6, 122.0, 121.9, 35.9, 31.0, 20.9, 19.4, 2.1.

**HRMS** (ESI): *m/z* [M+NH<sub>4</sub>]<sup>+</sup> calcd for [C<sub>39</sub>H<sub>43</sub>BrN<sub>3</sub>O<sub>2</sub>Si]<sup>+</sup> required 692.2308, found 692.2369.

[α]<sub>D</sub><sup>20</sup> = -250 (*c* = 0.01, CH<sub>2</sub>Cl<sub>2</sub>).

**HPLC Condition:** The enantiomeric excess value was determined by HPLC analysis on a Daicel Chiralcel AD-H, Hexanes/IPA = 94/6, 1.0 mL/min, λ = 254 nm, *t* (minor) = 19.428 min, *t* (major) = 9.633 min. The dr value was determined by **<sup>1</sup>HNMR**.

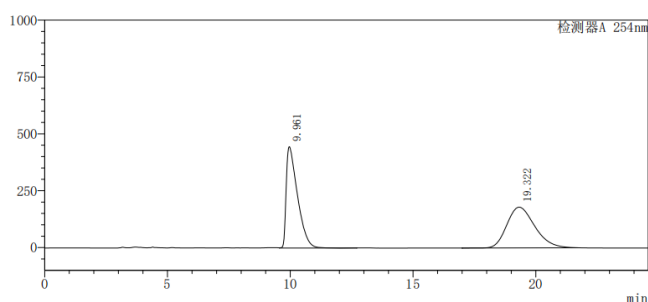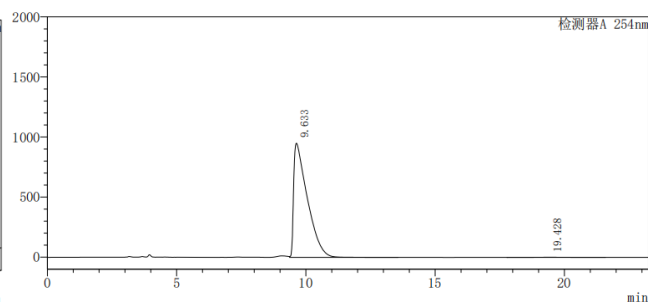

| Peak | Ret. Time | Area     | Height | Area%  |
|------|-----------|----------|--------|--------|
| 1    | 9.961     | 14220690 | 445550 | 50.114 |
| 2    | 19.322    | 14155740 | 179277 | 49.886 |

| Peak | Ret. Time | Area     | Height | Area%  |
|------|-----------|----------|--------|--------|
| 1    | 9.633     | 34957689 | 950260 | 99.640 |
| 2    | 19.428    | 126315   | 1479   | 0.360  |

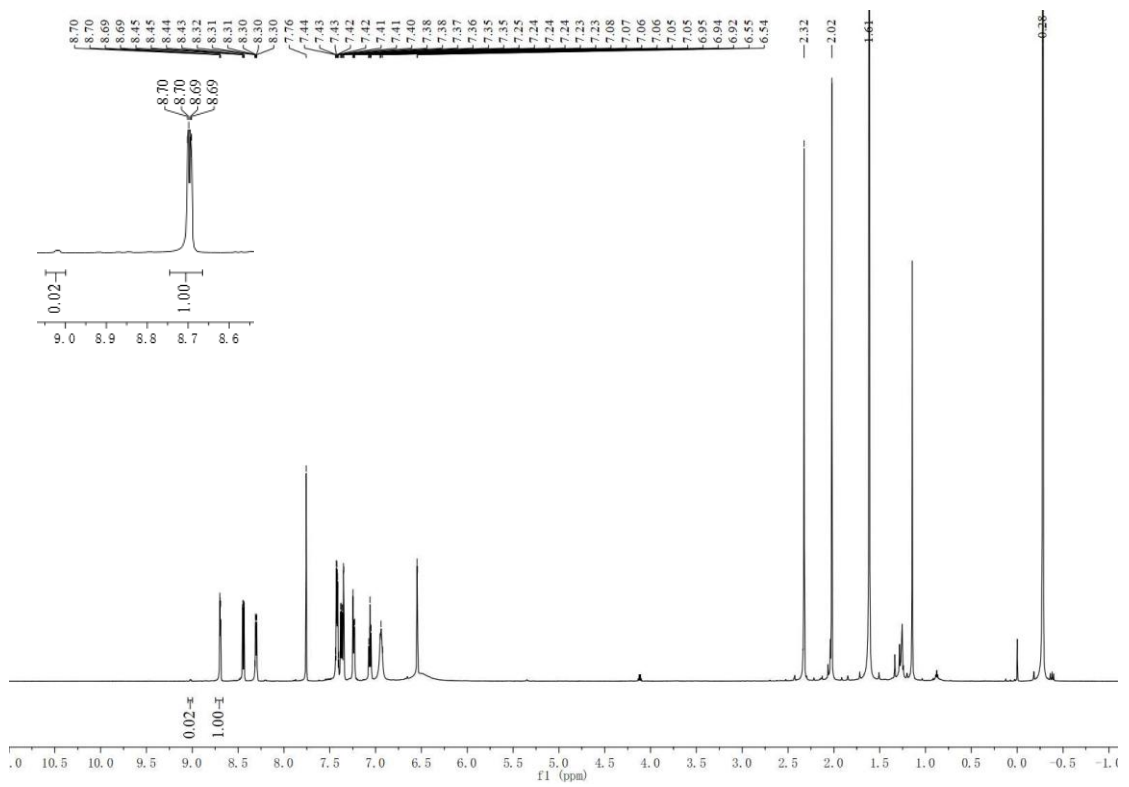

**(*S*<sub>a,C-O</sub>,*S*<sub>a,C-N</sub>)-4-((3-(tert-butyl)-4',5-dimethyl-[1,1'-biphenyl]-2-yl)oxy)-2-(7-methylquinolin-8-yl)-3-(trimethylsilyl)isoquinolin-1(2H)-one (5q)**

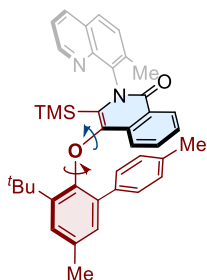

(PE:EA = 2:1) White solid. (56.5 mg, 93% yield, 21:1 dr, 99% ee). mp: 238–239 °C.

**<sup>1</sup>H NMR** (600 MHz, CDCl<sub>3</sub>) δ 8.70 (dd, *J* = 4.2, 1.7 Hz, 1H), 8.39 – 8.32 (m, 1H), 8.09 (dd, *J* = 8.2, 1.7 Hz, 1H), 7.77 (d, *J* = 8.4 Hz, 1H), 7.48 – 7.39 (m, 3H), 7.35 (d, *J* = 5.8 Hz, 1H), 7.28 (dd, *J* = 8.2, 4.2 Hz, 1H), 7.23 (ddd, *J* = 6.9, 3.5, 1.7 Hz, 1H), 6.90 – 6.70 (m, 2H), 6.68 – 5.99 (m, 3H), 2.33 (s, 3H), 2.25 (s, 3H), 2.06 (s, 3H), 1.63 (s, 9H), -0.29 (s, 9H).

**<sup>13</sup>C NMR** (151 MHz, CDCl<sub>3</sub>) δ 161.4, 151.4, 150.8, 145.4, 143.7, 139.5, 139.2, 137.2, 137.1, 136.3, 135.7, 134.2, 133.1 (2C), 132.6, 131.5, 131.0, 129.9, 129.3, 129.0, 128.2 (2C), 127.7, 127.6, 126.8, 126.5, 122.6, 120.9, 35.9, 31.0, 21.2, 20.9, 18.8, 2.0.

**HRMS** (ESI): *m/z* [M+H]<sup>+</sup> calcd for [C<sub>40</sub>H<sub>43</sub>N<sub>2</sub>O<sub>2</sub>Si]<sup>+</sup> required 611.3094, found 611.3085.

[α]<sub>D</sub><sup>20</sup> = -130.33 (c = 0.05, CH<sub>2</sub>Cl<sub>2</sub>).

**HPLC Condition:** The enantiomeric excess and dr value were determined by HPLC analysis on a Daicel Chiralcel AD-H, Hexanes/IPA = 94/6, 1.0 mL/min, λ = 254 nm. *t* (minor) = 19.051 min, *t* (major) = 8.948 min.

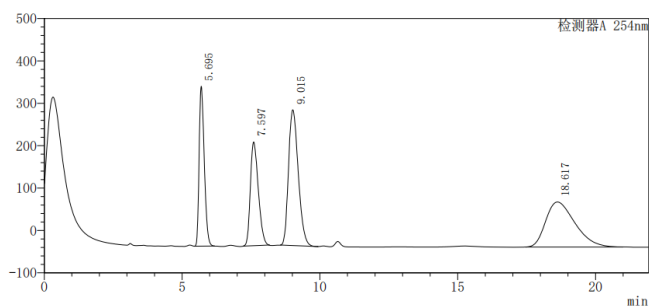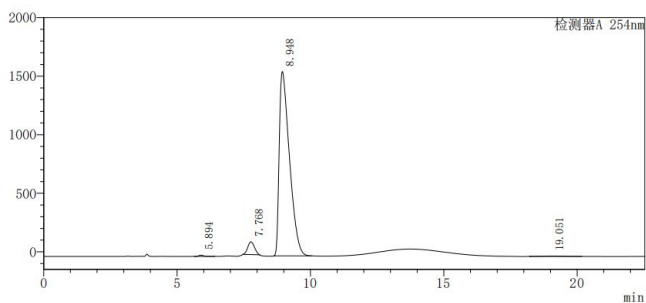

| Peak | Ret. Time | Area    | Height | Area%  |
|------|-----------|---------|--------|--------|
| 1    | 5.695     | 4894614 | 377145 | 19.216 |
| 2    | 7.597     | 4894731 | 244714 | 19.216 |
| 3    | 9.015     | 7873786 | 320195 | 30.912 |
| 4    | 18.617    | 7808844 | 106184 | 30.657 |

| Peak | Ret. Time | Area     | Height  | Area%  |
|------|-----------|----------|---------|--------|
| 1    | 5.894     | 139111   | 10984   | 0.315  |
| 2    | 7.768     | 1892762  | 108570  | 4.287  |
| 3    | 8.948     | 41933028 | 1574623 | 94.976 |
| 4    | 19.051    | 186390   | 3085    | 0.422  |

**(*S*<sub>a,C-O</sub>,*S*<sub>a,C-N</sub>)-4-((3,4'-di-tert-butyl-5-methyl-[1,1'-biphenyl]-2-yl)oxy)-2-(7-methylquinolin-8-yl)-3-(trimethylsilyl)isoquinolin-1(2H)-one (5r)**

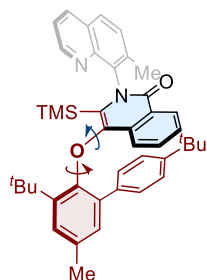

(PE:EA = 2:1) White solid. (53.5 mg, 82% yield, 25:1 dr, 98% ee). mp: 140–141 °C.

<sup>1</sup>H NMR (400 MHz, CDCl<sub>3</sub>) δ 8.71 (dd, *J* = 4.3, 1.8 Hz, 1H), 8.33 – 8.25 (m, 1H), 8.09 (dd, *J* = 8.3, 1.8 Hz, 1H), 7.77 (d, *J* = 8.4 Hz, 1H), 7.45 (d, *J* = 8.4 Hz, 1H), 7.40 (dd, *J* = 6.0, 3.6 Hz, 2H), 7.34 (d, *J* = 2.6 Hz, 1H), 7.30 – 7.26 (m, 2H), 6.96 (d, *J* = 8.8 Hz, 2H), 6.53 (d, *J* = 2.6 Hz, 3H), 2.32 (s, 3H), 2.14 (s, 3H), 1.62 (s, 9H), 1.26 (s, 9H), -0.29 (s, 9H).

<sup>13</sup>C NMR (101 MHz, CDCl<sub>3</sub>) δ 161.3, 151.0, 150.8, 149.0, 145.3, 143.6, 139.5, 139.1, 137.2, 137.1, 135.7, 134.0, 133.7, 133.0, 132.3, 131.3, 131.0, 129.7, 129.3, 129.0, 128.2, 128.1, 127.7, 126.7, 126.5, 123.6, 122.6, 120.9, 35.9, 34.4, 31.5, 31.1, 20.9, 19.9, 2.0.

HRMS (ESI): *m/z* [M+H]<sup>+</sup> calcd for [C<sub>43</sub>H<sub>49</sub>N<sub>2</sub>O<sub>2</sub>Si]<sup>+</sup> required 653.3563, found 653.3661.

[α]<sub>D</sub><sup>20</sup> = -233.33 (*c* = 0.05, CH<sub>2</sub>Cl<sub>2</sub>).

**HPLC Condition:** The enantiomeric excess value was determined by HPLC analysis on a Daicel Chiralcel AD-H, Hexanes/IPA = 94/6, 1.0 mL/min, λ = 254 nm. *t* (minor) = 14.200 min, *t* (major) = 11.608 min. The dr value was determined by <sup>1</sup>H NMR.

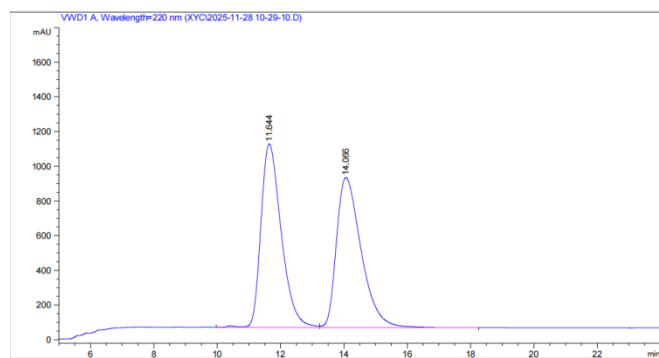

| Peak | RetTime | Area  | Height | Area%   |
|------|---------|-------|--------|---------|
| 1    | 11.644  | 46967 | 1057   | 50.1224 |
| 2    | 14.066  | 46738 | 864    | 49.8776 |

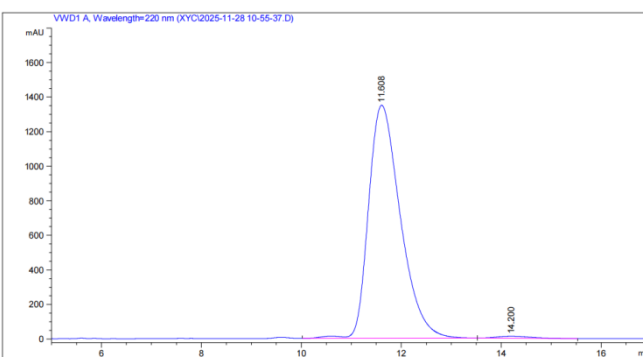

| Peak | RetTime | Area  | Height | Area%   |
|------|---------|-------|--------|---------|
| 1    | 11.608  | 59604 | 1348   | 99.0914 |
| 2    | 14.200  | 546   | 12     | 0.9086  |

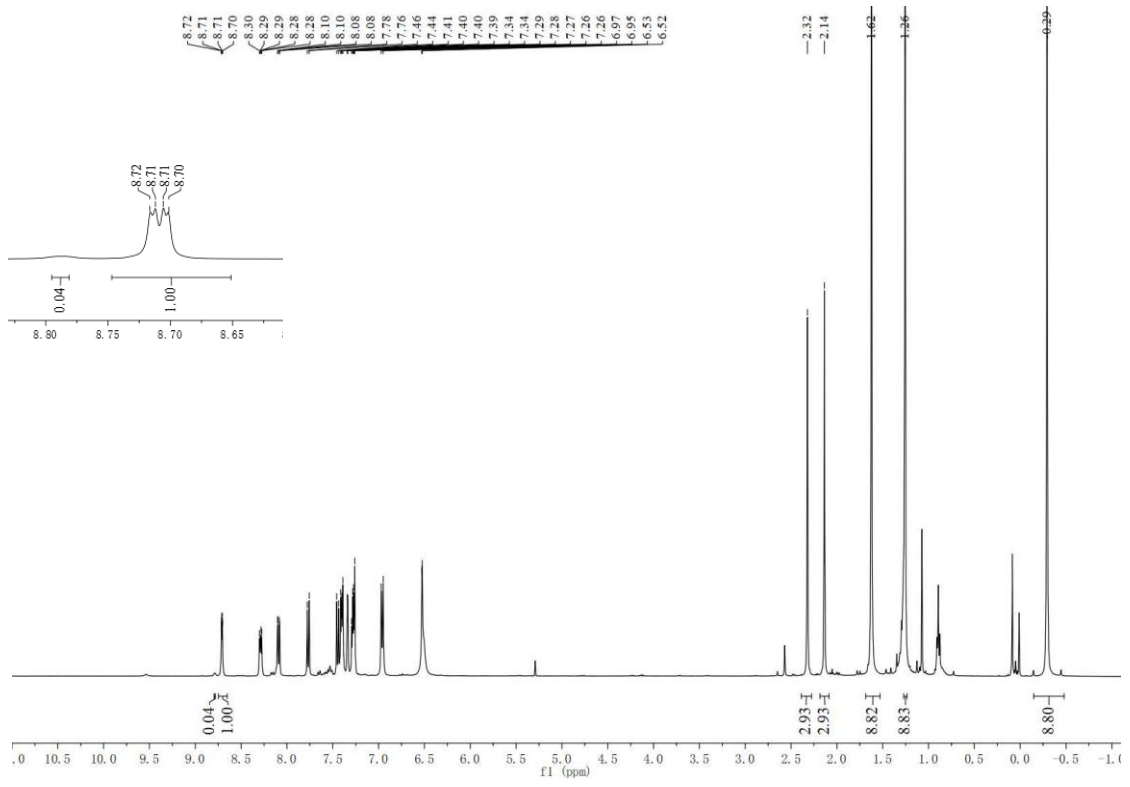

**(*S*<sub>a,C-O</sub>,*S*<sub>a,C-N</sub>)-4-((3-(tert-butyl)-5-methyl-[1,1':4',1''-terphenyl]-2-yl)oxy)-2-(7-methylquinolin-8-yl)-3-(trimethylsilyl)isoquinolin-1(2H)-one (5s)**

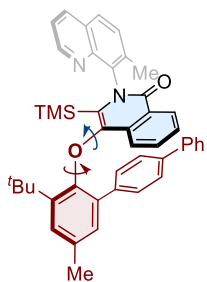

(PE:EA = 2:1) White solid. (62.6 mg, 93% yield, 73:1 dr, 99% ee). mp: 170–171 °C.

<sup>1</sup>H NMR (600 MHz, CDCl<sub>3</sub>) δ 8.67 (dd, *J* = 4.2, 1.7 Hz, 1H), 8.46 – 8.35 (m, 1H), 8.04 (dd, *J* = 8.1, 1.7 Hz, 1H), 7.69 (d, *J* = 8.4 Hz, 1H), 7.59 – 7.53 (m, 2H), 7.46 – 7.39 (m, 4H), 7.36 (d, *J* = 2.4 Hz, 1H), 7.34 – 7.28 (m, 2H), 7.26 – 7.22 (m, 3H), 6.56 (d, *J* = 2.3 Hz, 3H), 2.33 (s, 3H), 1.78 (s, 3H), 1.63 (s, 9H), -0.30 (s, 9H).

<sup>13</sup>C NMR (151 MHz, CDCl<sub>3</sub>) δ 161.3, 151.3, 150.7, 145.4, 143.6, 140.3, 139.6, 139.3 (3C), 137.1, 135.7, 134.5, 133.1, 133.0, 132.2, 131.6, 131.0, 130.5, 129.3, 129.1, 128.8, 128.5, 128.1, 127.6, 127.4, 127.0, 126.9, 126.6, 125.3, 122.6, 120.9, 35.9, 31.0, 20.9, 19.0, 1.9.

HRMS (ESI): *m/z* [M+H]<sup>+</sup> calcd for [C<sub>45</sub>H<sub>45</sub>N<sub>2</sub>O<sub>2</sub>Si]<sup>+</sup> required 673.3250, found 673.3226.

[α]<sub>D</sub><sup>20</sup> = -90.33 (c = 0.05, CH<sub>2</sub>Cl<sub>2</sub>).

**HPLC Condition:** The enantiomeric excess and dr value were determined by HPLC analysis on a Daicel Chiralcel AD-H, Hexanes/IPA = 94/6, 1.0 mL/min, λ = 254 nm. *t* (minor) = 15.476 min, *t* (major) = 11.795 min.

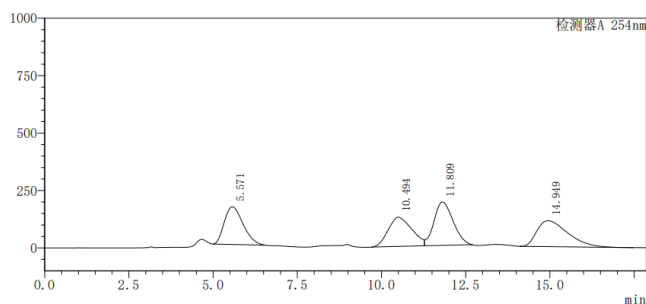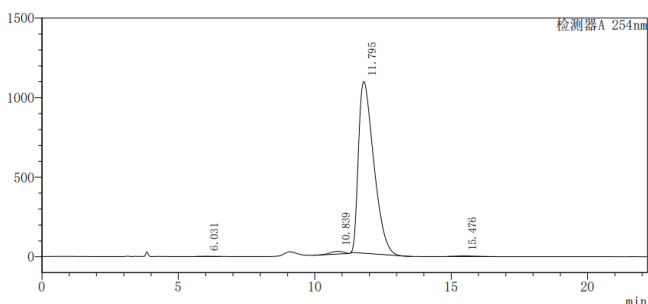

| Peak | Ret. Time | Area    | Height | Area%  |
|------|-----------|---------|--------|--------|
| 1    | 5.571     | 6358407 | 164021 | 23.333 |
| 2    | 10.494    | 6195748 | 127384 | 22.736 |
| 3    | 11.809    | 7449291 | 188816 | 27.336 |
| 4    | 14.949    | 7247303 | 113203 | 26.595 |

| Peak | Ret. Time | Area     | Height  | Area%  |
|------|-----------|----------|---------|--------|
| 1    | 6.031     | 29150    | 1083    | 0.068  |
| 2    | 10.839    | 553101   | 16692   | 1.289  |
| 3    | 11.795    | 42137821 | 1079618 | 98.185 |
| 4    | 15.476    | 196903   | 3864    | 0.459  |

**(*S*<sub>a,C-O</sub>,*S*<sub>a,C-N</sub>)-4-((3-(tert-butyl)-4'-chloro-5-methyl-[1,1'-biphenyl]-2-yl)oxy)-2-(7-methylquinolin-8-yl)-3-(trimethylsilyl)isoquinolin-1(2H)-one (5t)**

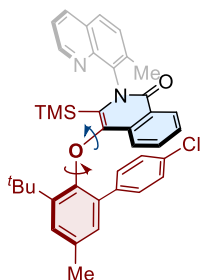

(PE:EA = 2:1) White solid. (52.4 mg, 83% yield, 174:1 dr, 99% ee). mp: 275–277 °C.

<sup>1</sup>H NMR (600 MHz, CDCl<sub>3</sub>) δ 8.70 (dd, *J* = 4.2, 1.7 Hz, 1H), 8.42 – 8.34 (m, 1H), 8.10 (dd, *J* = 8.2, 1.7 Hz, 1H), 7.78 (d, *J* = 8.5 Hz, 1H), 7.47 (d, *J* = 8.5 Hz, 1H), 7.45 – 7.39 (m, 2H), 7.37 (d, *J* = 2.4 Hz, 1H), 7.28 (dd, *J* = 8.2, 4.2 Hz, 1H), 7.21 – 7.16 (m, 1H), 7.08 – 6.83 (m, 2H), 6.50 (dd, *J* = 2.3, 1.0 Hz, 3H), 2.33 (s, 3H), 2.12 (s, 3H), 1.62 (s, 9H), -0.30 (s, 9H).

<sup>13</sup>C NMR (151 MHz, CDCl<sub>3</sub>) δ 161.3, 151.3, 150.7, 145.4, 143.5, 139.7, 139.4, 138.5, 137.1, 135.8, 134.6, 133.2, 133.0, 132.7, 131.8, 131.3, 131.1, 129.5, 129.2, 128.8, 128.2, 127.7, 127.1, 127.0, 126.5, 122.5, 120.9, 35.9, 31.0, 20.9, 18.9, 1.9.

HRMS (ESI): *m/z* [M+Na]<sup>+</sup> calcd for [C<sub>39</sub>H<sub>39</sub>ClN<sub>2</sub>NaO<sub>2</sub>Si]<sup>+</sup> required 653.2367, found 653.2378.

[α]<sub>D</sub><sup>20</sup> = -91.33 (c = 0.05, CH<sub>2</sub>Cl<sub>2</sub>).

**HPLC Condition:** The enantiomeric excess and dr value were determined by HPLC analysis on a Daicel Chiralcel AD-H, Hexanes/IPA = 94/6, 1.0 mL/min, λ = 254 nm. *t* (minor) = 14.413 min, *t* (major) = 12.990 min.

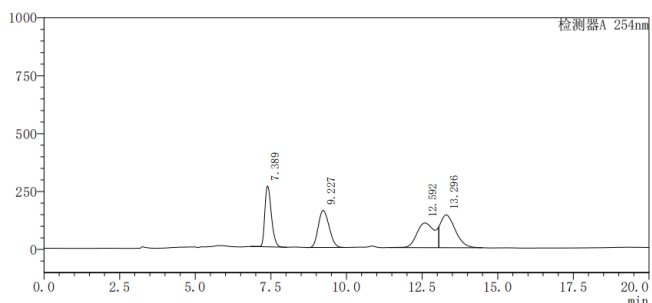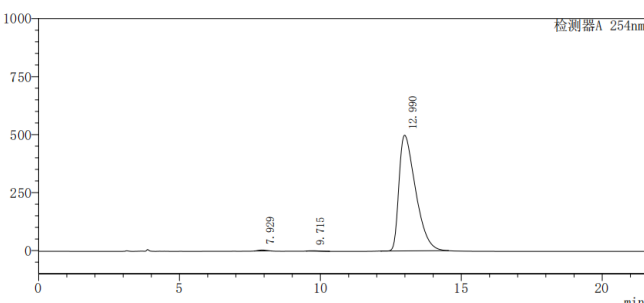

| Peak | Ret. Time | Area    | Height | Area%  |
|------|-----------|---------|--------|--------|
| 1    | 7.389     | 3920003 | 262267 | 22.949 |
| 2    | 9.227     | 3979363 | 159899 | 23.297 |
| 3    | 12.592    | 4418821 | 106432 | 25.869 |
| 4    | 13.296    | 4763138 | 141674 | 27.885 |

| Peak | Ret. Time | Area     | Height | Area%  |
|------|-----------|----------|--------|--------|
| 1    | 7.929     | 77821    | 3885   | 0.374  |
| 2    | 9.715     | 39410    | 1700   | 0.190  |
| 3    | 12.990    | 20625339 | 500290 | 99.177 |
| 4    | 14.413    | 53971    | 3780   | 0.260  |

(*S*<sub>a,C-O</sub>,*S*<sub>a,C-N</sub>)-4-((3-(tert-butyl)-5-methyl-4'-(trifluoromethyl)-[1,1'-biphenyl]-2-yl)oxy)-2-(7-methylquinolin-8-yl)-3-(trimethylsilyl)isoquinolin-1(2H)-one (**5u**)

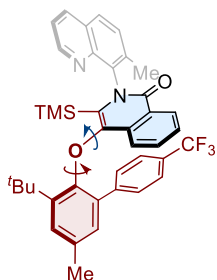

(PE:EA = 2:1) White solid. (55.2 mg, 83% yield, 282:1 dr, 99% ee). mp: 270–271 °C.

<sup>1</sup>H NMR (600 MHz, CDCl<sub>3</sub>) δ 8.70 (dd, *J* = 4.2, 1.7 Hz, 1H), 8.39 – 8.32 (m, 1H), 8.09 (dd, *J* = 8.2, 1.7 Hz, 1H), 7.77 (d, *J* = 8.4 Hz, 1H), 7.48 – 7.39 (m, 3H), 7.35 (d, *J* = 5.8 Hz, 1H), 7.28 (dd, *J* = 8.2, 4.2 Hz, 1H), 7.23 (ddd, *J* = 6.9, 3.5, 1.7 Hz, 1H), 6.90 – 6.70 (m, 2H), 6.68 – 5.99 (m, 3H), 2.33 (s, 3H), 2.25 (s, 3H), 2.06 (s, 3H), 1.63 (s, 9H), -0.29 (s, 9H).

<sup>19</sup>F NMR (565 MHz, Chloroform-*d*) δ -62.13.

<sup>13</sup>C NMR (151 MHz, CDCl<sub>3</sub>) δ 161.2, 151.0, 150.8, 145.4, 144.2, 143.3, 139.6 (2C), 137.0, 135.8, 134.9, 132.8, 132.6, 131.9, 131.2, 131.1, 130.3, 129.4, 129.3, 129.2, 129.0 (d, <sup>2</sup>*J*<sub>C-F</sub> = 32.5 Hz), 128.3, 127.7, 127.0, 126.5, 125.1 (q, <sup>1</sup>*J*<sub>C-F</sub> = 272.1 Hz), 123.8, 122.5, 121.5, 36.0, 31.0, 20.9, 18.8, 1.9.

HRMS (ESI): *m/z* [M+H]<sup>+</sup> calcd for [C<sub>40</sub>H<sub>40</sub>F<sub>3</sub>N<sub>2</sub>O<sub>2</sub>Si]<sup>+</sup> required 665.2811, found 665.2803.

[α]<sub>D</sub><sup>20</sup> = -91.67 (c = 0.05, CH<sub>2</sub>Cl<sub>2</sub>).

**HPLC Condition:** The enantiomeric excess and dr value were determined by HPLC analysis on a Daicel Chiralcel AD-H, Hexanes/IPA = 94/6, 1.0 mL/min, λ = 254 nm. *t* (minor) = 8.233 min, *t* (major) = 9.492 min.

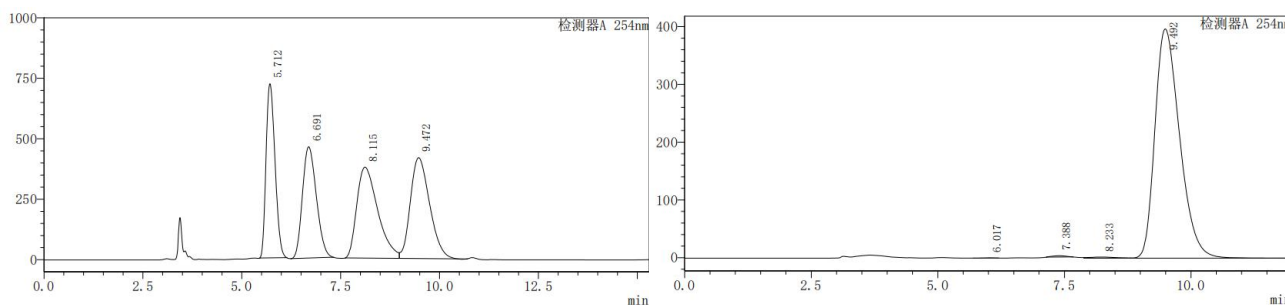

| Peak | Ret. Time | Area     | Height | Area%  |
|------|-----------|----------|--------|--------|
| 1    | 5.712     | 11354968 | 719867 | 22.453 |
| 2    | 6.691     | 11261731 | 460179 | 22.268 |
| 3    | 8.115     | 13852062 | 375812 | 27.390 |
| 4    | 9.472     | 14103904 | 416987 | 27.888 |

| Peak | Ret. Time | Area     | Height | Area%  |
|------|-----------|----------|--------|--------|
| 1    | 6.017     | 5450     | 416    | 0.040  |
| 2    | 7.388     | 42515    | 2237   | 0.313  |
| 3    | 8.233     | 70826    | 1958   | 0.522  |
| 4    | 9.492     | 13460679 | 396854 | 99.125 |

**(*S*<sub>a,C-O</sub>,*S*<sub>a,C-N</sub>)-4-(2-(tert-butyl)-4-methyl-6-(naphthalen-1-yl)phenoxy)-2-(7-methylquinolin-8-yl)-3-(trimethylsilyl)isoquinolin-1(2H)-one (5v)**

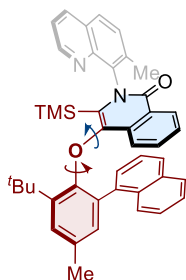

(PE:EA = 2:1) White solid. (58.2 mg, 90% yield, 46:1 dr, 96% ee). mp: 152–153 °C.

<sup>1</sup>H NMR (600 MHz, DMSO-*d*<sub>6</sub>) δ 8.66 (d, *J* = 5.2 Hz, 1H), 8.31 (d, *J* = 8.3 Hz, 1H), 8.09 (d, *J* = 7.8 Hz, 1H), 7.87 (d, *J* = 8.5 Hz, 1H), 7.81 (d, *J* = 8.0 Hz, 1H), 7.61 (d, *J* = 8.0 Hz, 1H), 7.59 – 7.37 (m, 7H), 7.35 (d, *J* = 8.6 Hz, 1H), 7.28 (d, *J* = 8.4 Hz, 1H), 6.58 (s, 3H), 2.30 (s, 3H), 1.60 (s, 9H), 1.01 (s, 3H), -0.38 (s, 9H).

<sup>13</sup>C NMR (151 MHz, DMSO-*d*<sub>6</sub>) δ 159.5, 150.6, 150.3, 144.4, 142.2, 139.0, 138.2, 136.6, 136.1, 135.9, 134.0, 132.5, 132.3, 131.8, 131.5, 131.2, 131.1, 128.8, 128.3, 128.0 (2C), 127.9, 127.5, 127.4, 127.1, 127.0 (2C), 126.1, 125.9, 125.8 (2C), 121.7, 120.9, 35.3, 30.4, 20.2, 16.7, 1.3.

HRMS (ESI): *m/z* [M+H]<sup>+</sup> calcd for [C<sub>43</sub>H<sub>43</sub>N<sub>2</sub>O<sub>2</sub>Si]<sup>+</sup> required 647.3094, found 647.3056.

[α]<sub>D</sub><sup>20</sup> = -10 (c = 0.05, CH<sub>2</sub>Cl<sub>2</sub>).

**HPLC Condition:** The enantiomeric excess value was determined by HPLC analysis on a Daicel Chiralcel AD-H, Hexanes/IPA = 94/6, 1.0 mL/min, λ = 254 nm. *t* (minor) = 17.088 min, *t* (major) = 15.332 min. The dr value was determined by <sup>1</sup>H NMR.

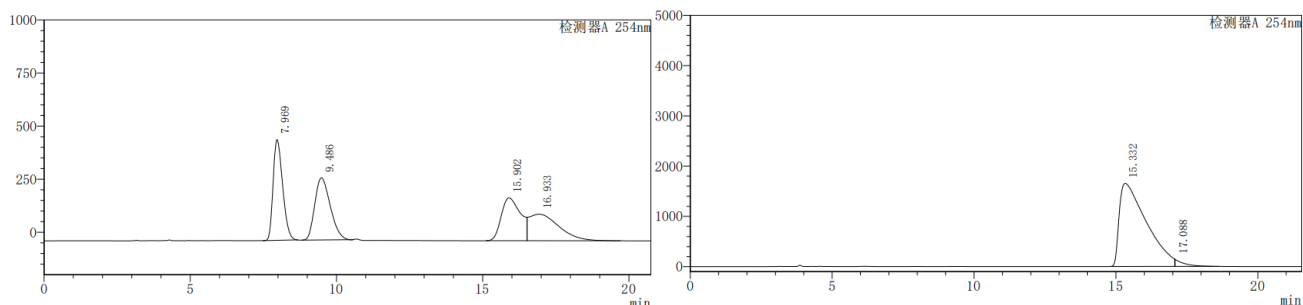

| Peak | Ret. Time | Area    | Height | Area%  |
|------|-----------|---------|--------|--------|
| 1    | 15.902    | 9300173 | 201852 | 23.447 |
| 2    | 16.933    | 8864659 | 125215 | 22.349 |

| Peak | Ret. Time | Area      | Height  | Area%  |
|------|-----------|-----------|---------|--------|
| 1    | 15.332    | 109463867 | 1652116 | 97.360 |
| 2    | 17.088    | 2967632   | 140804  | 2.640  |

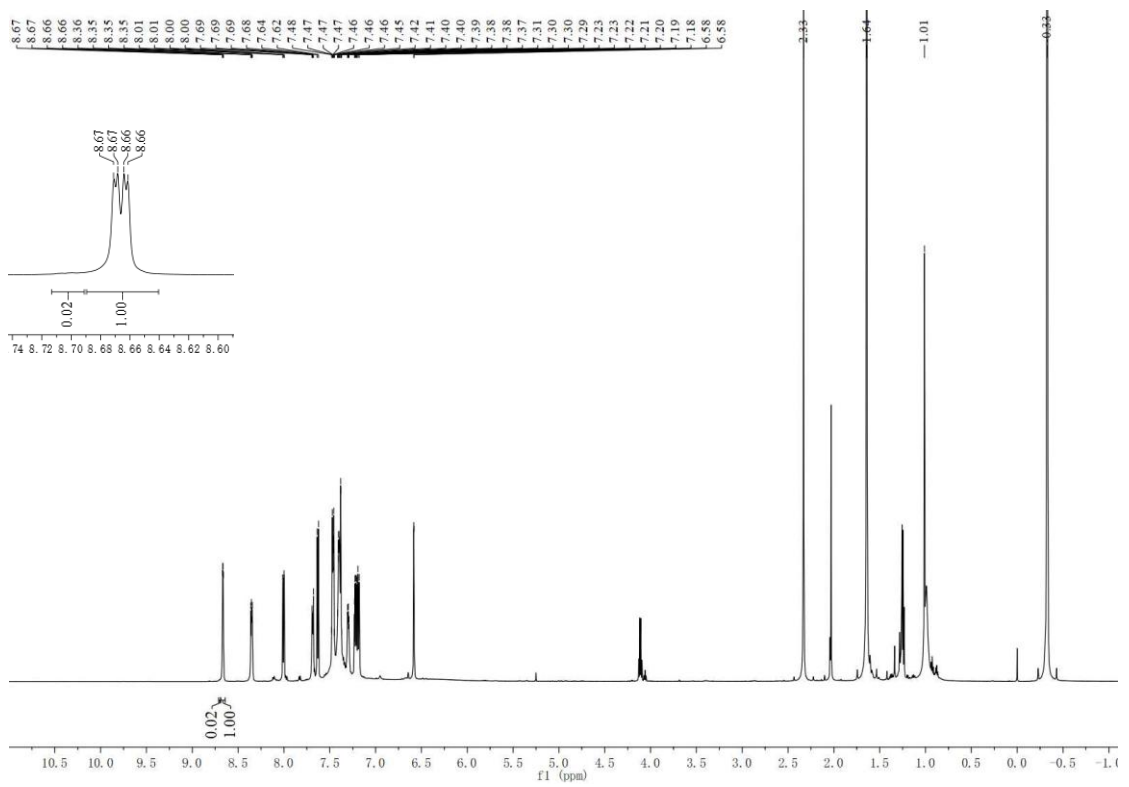

(*S*<sub>a,C-O</sub>,*S*<sub>a,C-N</sub>)-4-((3-(tert-butyl)-3',5-dimethyl-[1,1'-biphenyl]-2-yl)oxy)-2-(7-methylquinolin-8-yl)-3-(trimethylsilyl)isoquinolin-1(2H)-one (**5w**)

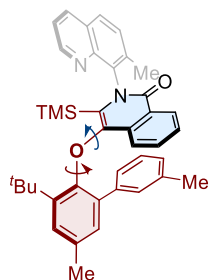

(PE:EA = 2:1) White solid. (59.2 mg, 97% yield, 15:1 dr, 99% ee). mp: 143–144 °C.

<sup>1</sup>H NMR (600 MHz, DMSO-*d*<sub>6</sub>) δ 8.69 (d, *J* = 4.2 Hz, 1H), 8.37 (dd, *J* = 8.3, 1.4 Hz, 1H), 8.20 – 8.13 (m, 1H), 7.97 (d, *J* = 8.4 Hz, 1H), 7.57 – 7.49 (m, 3H), 7.44 (ddd, *J* = 6.3, 4.2, 2.2 Hz, 1H), 7.36 (s, 1H), 7.22 (d, *J* = 8.3 Hz, 1H), 7.09 – 6.79 (m, 2H), 6.49 (s, 1H), 2.27 (s, 3H), 1.96 (s, 6H), 1.57 (s, 9H), -0.37 (s, 9H).

<sup>13</sup>C NMR (151 MHz, DMSO) δ 159.8, 150.4, 150.4, 144.5, 142.2, 139.4, 138.9, 138.1, 136.3, 135.9, 135.2, 134.1, 132.5, 132.2, 131.7, 131.0, 130.1, 129.0, 128.1, 128.0, 127.9, 127.3, 127.1, 126.8, 126.5, 126.3, 125.9, 121.7, 121.0, 35.3, 30.4, 20.7, 20.2, 18.4, 1.3.

HRMS (ESI): *m/z* [M+H]<sup>+</sup> calcd for [C<sub>40</sub>H<sub>43</sub>N<sub>2</sub>O<sub>2</sub>Si]<sup>+</sup> required 611.3094, found 611.3089.

[α]<sub>D</sub><sup>20</sup> = -98 (c = 0.05, CH<sub>2</sub>Cl<sub>2</sub>).

**HPLC Condition:** The enantiomeric excess value was determined by HPLC analysis on a Daicel Chiralcel AD-H, Hexanes/IPA = 94/6, 1.0 mL/min, λ = 254 nm. *t* (minor) = 7.628 min, *t* (major) = 7.939 min.

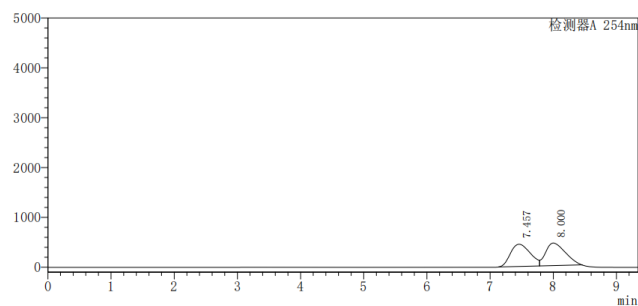

| Peak | Ret. Time | Area    | Height | Area%  |
|------|-----------|---------|--------|--------|
| 1    | 7.457     | 9724702 | 446895 | 49.862 |
| 2    | 8.000     | 9778419 | 452216 | 50.138 |

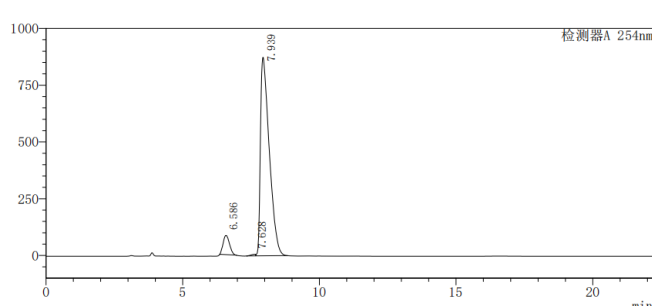

| Peak | Ret. Time | Area     | Height | Area%  |
|------|-----------|----------|--------|--------|
| 1    | 7.628     | 85780    | 7210   | 0.434  |
| 2    | 7.939     | 19646097 | 874526 | 99.566 |

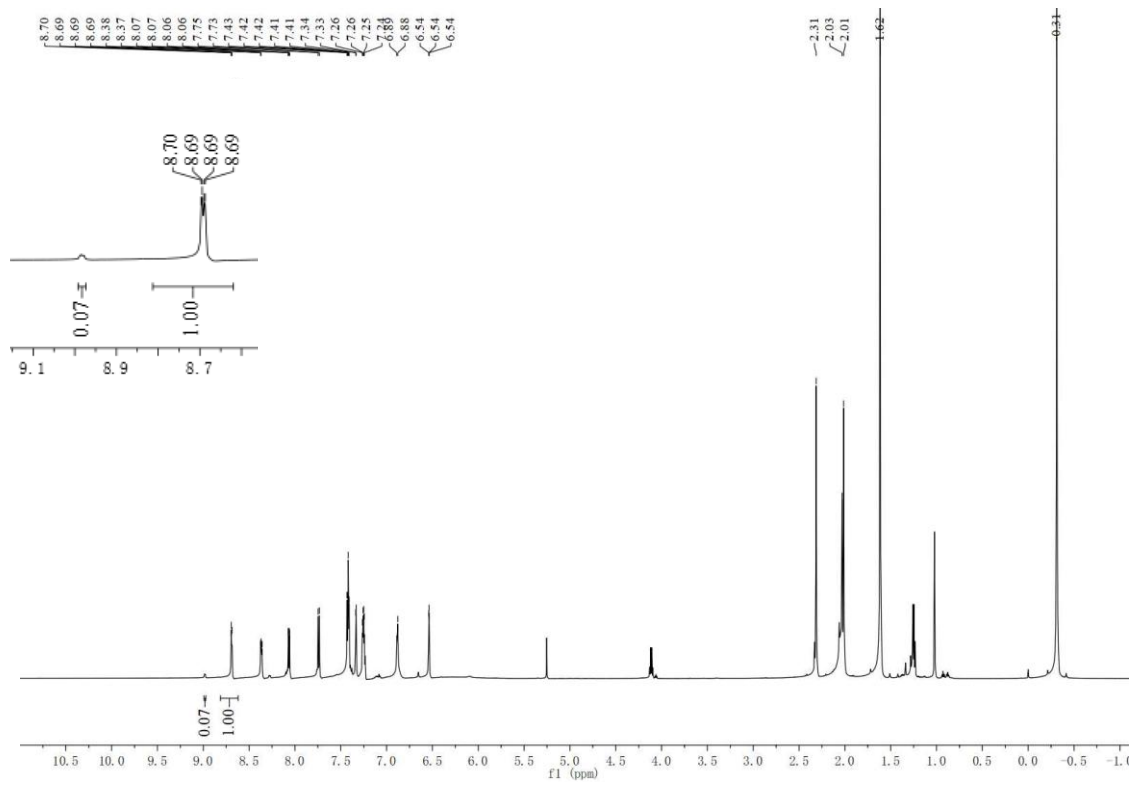

**(*S*<sub>a,C-O</sub>,*S*<sub>a,C-N</sub>)-4-((3,5-di-tert-butyl-[1,1'-biphenyl]-2-yl)oxy)-2-(7-methylquinolin-8-yl)-3-(trimethylsilyl)isoquinolin-1(2H)-one (5x)**

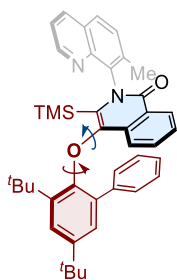

(PE:EA = 2:1) White solid. (58.8 mg, 92% yield, 19:1 dr, 99% ee). mp: 133–134 °C.

<sup>1</sup>H NMR (600 MHz, CDCl<sub>3</sub>) δ 8.69 (dd, *J* = 4.1, 1.7 Hz, 1H), 8.33 (tq, *J* = 5.7, 1.7 Hz, 1H), 8.09 (dd, *J* = 8.2, 1.7 Hz, 1H), 7.77 (d, *J* = 8.5 Hz, 1H), 7.57 (dt, *J* = 5.2, 2.5 Hz, 1H), 7.46 – 7.40 (m, 2H), 7.37 (tdd, *J* = 7.4, 3.0, 1.5 Hz, 1H), 7.27 (dd, *J* = 8.2, 4.2 Hz, 1H), 7.15 – 7.08 (m, 2H), 6.98 (d, *J* = 9.2 Hz, 2H), 6.85 – 6.22 (m, 3H), 2.06 (s, 3H), 1.65 (s, 9H), 1.34 (s, 9H), -0.28 (s, 9H).

<sup>13</sup>C NMR (151 MHz, CDCl<sub>3</sub>) δ 161.4, 151.1, 150.7, 145.4, 144.9, 143.8, 140.4, 139.8, 138.6, 137.2, 135.7, 134.3, 133.1, 132.2, 130.9, 130.2, 129.4, 129.2, 128.9, 128.2, 127.7, 126.9, 126.8 (2C), 126.5, 124.5, 122.6, 120.9, 36.2, 34.6, 31.7, 31.1, 19.7, 2.0.

HRMS (ESI): *m/z* [M+Na]<sup>+</sup> calcd for [C<sub>42</sub>H<sub>46</sub>N<sub>2</sub>NaO<sub>2</sub>Si]<sup>+</sup> required 661.3226, found 661.3232.

[α]<sub>D</sub><sup>20</sup> = -70 (c = 0.05, CH<sub>2</sub>Cl<sub>2</sub>).

**HPLC Condition:** The enantiomeric excess and dr value were determined by HPLC analysis on a Daicel Chiralcel AD-H, Hexanes/IPA = 94/6, 1.0 mL/min, λ = 254 nm. *t* (minor) = 8.934 min, *t* (major) = 6.570 min.

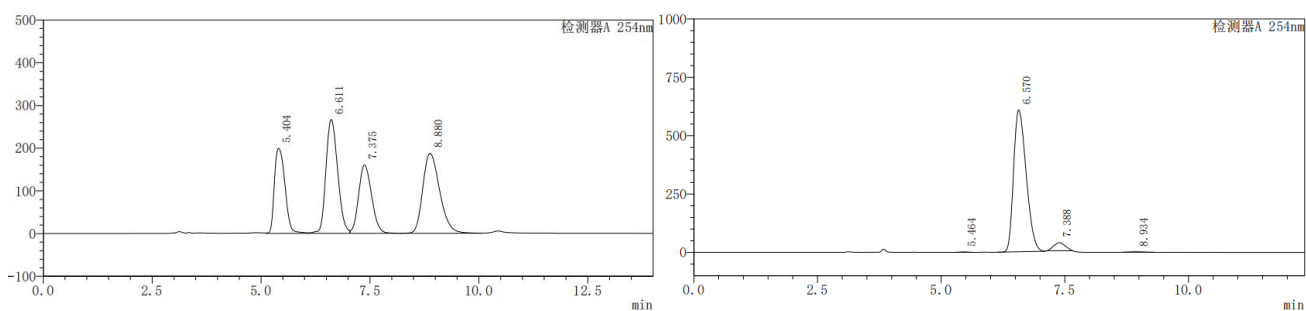

| Peak | Ret. Time | Area    | Height | Area%  |
|------|-----------|---------|--------|--------|
| 1    | 5.404     | 3353266 | 198830 | 20.031 |
| 2    | 6.611     | 4999476 | 266602 | 29.865 |
| 3    | 7.375     | 3327794 | 160225 | 19.879 |
| 4    | 8.880     | 5059677 | 187128 | 30.225 |

| Peak | Ret. Time | Area     | Height | Area%  |
|------|-----------|----------|--------|--------|
| 1    | 5.464     | 21423    | 1697   | 0.189  |
| 2    | 6.570     | 10744560 | 607415 | 94.569 |
| 3    | 7.388     | 554758   | 33568  | 4.883  |
| 4    | 8.934     | 40844    | 2046   | 0.359  |

**(*S*<sub>a,C-O</sub>,*S*<sub>a,C-N</sub>)-4-((3-(tert-butyl)-5-methyl-[1,1'-biphenyl]-2-yl)oxy)-3-(dimethyl(phenyl)silyl)-2-(7-methylquinolin-8-yl)isoquinolin-1(2H)-one (5y)**

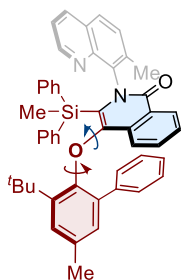

(PE:EA = 2:1) White solid. (63.9 mg, 97% yield, 22:1 dr, 99% ee). mp: 141–142 °C.

**<sup>1</sup>H NMR (600 MHz, CDCl<sub>3</sub>)** δ 8.44 (dd, *J* = 4.2, 1.7 Hz, 1H), 8.42 – 8.35 (m, 1H), 7.92 (dd, *J* = 8.2, 1.7 Hz, 1H), 7.52 (d, *J* = 8.4 Hz, 1H), 7.46 (pd, *J* = 7.1, 1.6 Hz, 2H), 7.30 (dd, *J* = 7.5, 1.9 Hz, 2H), 7.15 – 7.11 (m, 3H), 7.11 – 7.07 (m, 3H), 7.04 (t, *J* = 7.4 Hz, 4H), 6.56 (d, *J* = 2.3 Hz, 3H), 2.32 (s, 3H), 1.98 (s, 3H), 1.35 (s, 9H), 0.50 (s, 3H), -0.45 (s, 3H).

**<sup>13</sup>C NMR (151 MHz, CDCl<sub>3</sub>)** δ 161.5, 151.3, 150.5, 145.0, 144.8, 140.0, 139.8, 139.4, 138.1, 136.6, 135.2, 134.1, 133.0, 132.9, 132.5, 132.1, 131.6, 131.1, 130.1, 129.1, 129.0, 128.5, 128.4, 128.3, 127.5, 127.2, 127.1, 127.0, 126.9 (2C), 122.9, 120.8, 35.6, 30.7, 20.9, 19.8, 2.0, 1.1.

**HRMS (ESI):** *m/z* [M+NH<sub>4</sub>]<sup>+</sup> calcd for [C<sub>44</sub>H<sub>46</sub>N<sub>3</sub>O<sub>2</sub>Si]<sup>+</sup> required 676.3359, found 676.3334.

[α]<sub>D</sub><sup>20</sup> = -95 (c = 0.05, CH<sub>2</sub>Cl<sub>2</sub>).

**HPLC Condition:** The enantiomeric excess value was determined by HPLC analysis on a Daicel Chiralcel AD-H, Hexanes/IPA = 94/6, 1.0 mL/min, λ = 254 nm. *t* (minor) = 14.178 min, *t* (major) = 10.011 min. The dr value was determined by <sup>1</sup>HNMR.

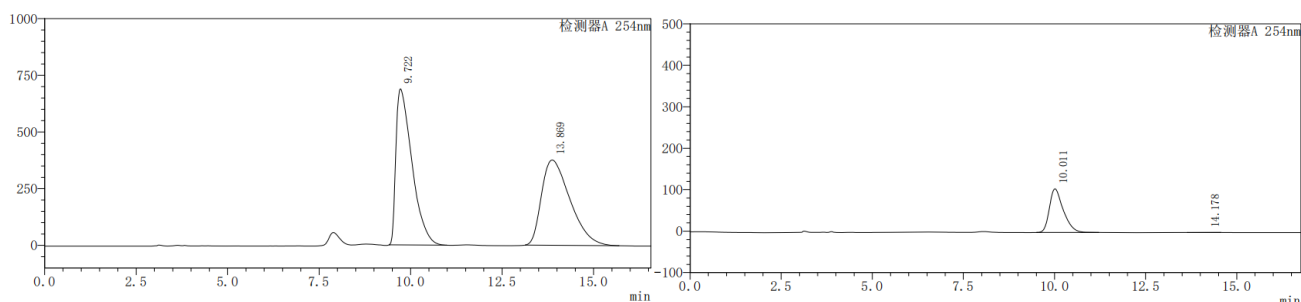

| Peak | Ret. Time | Area     | Height | Area%  |
|------|-----------|----------|--------|--------|
| 1    | 9.722     | 21023927 | 688155 | 50.771 |
| 2    | 13.869    | 20385338 | 376013 | 49.229 |

| Peak | Ret. Time | Area    | Height | Area%  |
|------|-----------|---------|--------|--------|
| 1    | 10.011    | 2799210 | 105384 | 99.626 |
| 2    | 14.178    | 10494   | 325    | 0.374  |

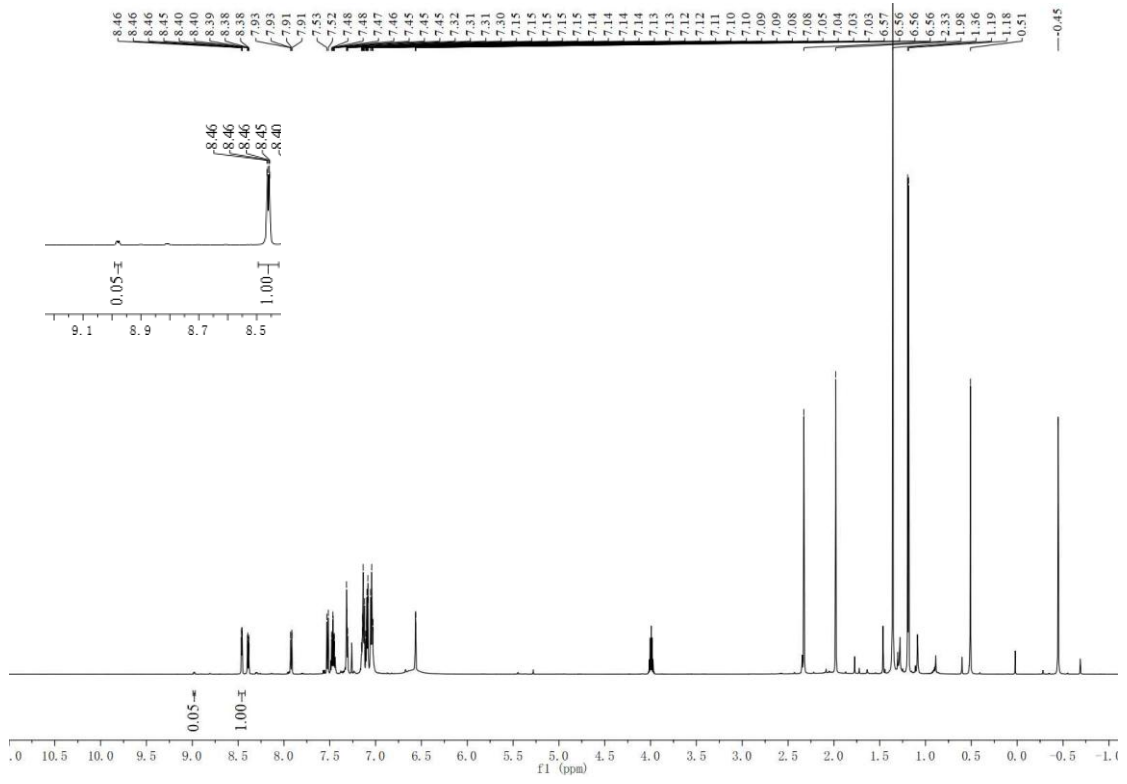

**(*S*<sub>a,C-O</sub>,*S*<sub>a,C-N</sub>)-4-(2-(tert-butyl)-4,6-dimethylphenoxy)-2-(7-methylquinolin-8-yl)-3-(trimethylsilyl)isoquinolin-1(2H)-one (5z)**

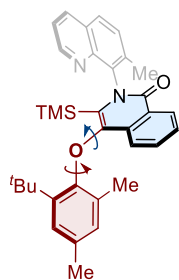

(PE:EA = 2:1) White solid. (46.5 mg, 87% yield, 6:1 dr, 99% ee). mp: 210–211 °C.

<sup>1</sup>H NMR (600 MHz, CDCl<sub>3</sub>) δ 8.94 – 8.77 (m, 1H), 8.44 (d, *J* = 7.9 Hz, 1H), 8.16 (d, *J* = 8.3 Hz, 1H), 7.84 (d, *J* = 8.3 Hz, 1H), 7.53 (d, *J* = 8.4 Hz, 1H), 7.41 (t, *J* = 7.5 Hz, 1H), 7.38 – 7.33 (m, 2H), 7.24 (d, *J* = 3.3 Hz, 1H), 7.16 (d, *J* = 2.0 Hz, 1H), 6.64 (s, 1H), 2.39 (s, 3H), 2.29 (s, 3H), 1.99 (s, 3H), 1.54 (s, 9H), -0.27 (s, 9H).

<sup>13</sup>C NMR (151 MHz, CDCl<sub>3</sub>) δ 161.6, 152.5, 151.1, 145.8, 144.9, 139.1, 138.4, 137.7, 136.0, 134.6, 133.0, 132.3, 132.2, 131.5, 129.6, 129.1, 128.4, 127.9, 127.4, 127.0, 126.8, 126.4, 121.7, 121.1, 35.7, 31.0, 21.0, 20.1, 18.5, 1.2.

HRMS (ESI): *m/z* [M+H]<sup>+</sup> calcd for [C<sub>34</sub>H<sub>39</sub>N<sub>2</sub>O<sub>2</sub>Si]<sup>+</sup> required 535.2781, found 535.2767.

[α]<sub>D</sub><sup>20</sup> = -89 (c = 0.05, CH<sub>2</sub>Cl<sub>2</sub>).

**HPLC Condition:** The enantiomeric excess and dr value were determined by HPLC analysis on a Daicel Chiralcel IC, Hexanes/IPA = 80/20, 1.0 mL/min, λ = 254 nm. *t* (minor) = 56.607 min, *t* (major) = 26.863 min.

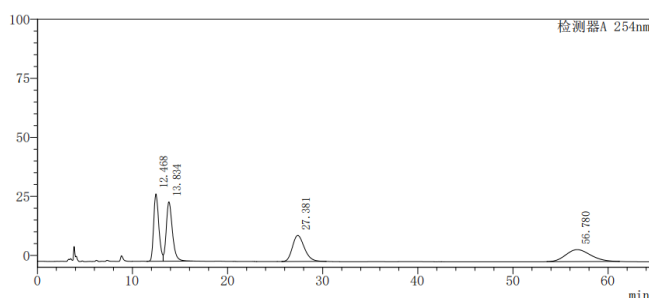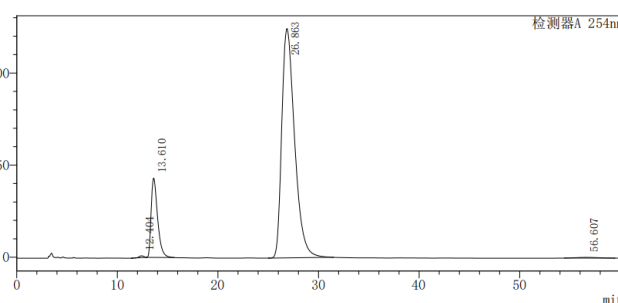

| Peak | Ret. Time | Area    | Height | Area%  |
|------|-----------|---------|--------|--------|
| 1    | 12.468    | 1075231 | 28555  | 26.340 |
| 2    | 13.834    | 1129148 | 25118  | 27.661 |
| 3    | 27.381    | 961606  | 11041  | 23.557 |
| 4    | 56.780    | 916107  | 5058   | 22.442 |

| Peak | Ret. Time | Area     | Height | Area%  |
|------|-----------|----------|--------|--------|
| 1    | 12.404    | 145009   | 4784   | 0.222  |
| 2    | 13.610    | 9551305  | 215438 | 14.650 |
| 3    | 26.863    | 55217133 | 622553 | 84.691 |
| 4    | 56.607    | 285038   | 1833   | 0.437  |

**(*S*<sub>a,C-O</sub>,*S*<sub>a,C-N</sub>)-4-((3-(tert-butyl)-5-methyl-[1,1'-biphenyl]-2-yl)oxy)-3-(1-hydroxycyclobutyl)-2-(7-methylquinolin-8-yl)isoquinolin-1(2H)-one (5za)**

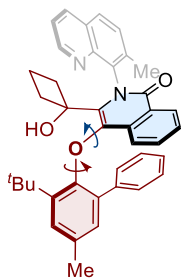

(PE:EA = 2:1) White solid. (54.1 mg, 91% yield, >20:1 dr, 99% ee). mp: 128–129 °C.

**<sup>1</sup>H NMR (600 MHz, CDCl<sub>3</sub>)** δ 8.96 (d, *J* = 4.4 Hz, 1H), 8.19 (dd, *J* = 13.4, 7.8 Hz, 2H), 7.78 (d, *J* = 8.4 Hz, 1H), 7.46 – 7.40 (m, 2H), 7.38 – 7.31 (m, 3H), 7.24 (d, *J* = 5.0 Hz, 1H), 7.20 (d, *J* = 8.1 Hz, 1H), 7.10 (t, *J* = 7.5 Hz, 2H), 6.63 (d, *J* = 2.2 Hz, 3H), 4.31 (s, 1H), 2.83 (d, *J* = 10.0 Hz, 1H), 2.33 (s, 3H), 2.07 (s, 3H), 2.05 – 1.99 (m, 1H), 1.96 (d, *J* = 12.0 Hz, 1H), 1.83 – 1.76 (m, 1H), 1.47 (t, *J* = 9.5 Hz, 1H), 0.59 (d, *J* = 6.2 Hz, 1H).

**<sup>13</sup>C NMR (151 MHz, CDCl<sub>3</sub>)** δ 161.2, 151.3, 150.7, 146.0, 139.3, 139.2, 138.3, 136.7, 136.1, 134.7, 133.5, 132.9, 132.3, 132.2, 131.9, 130.9, 130.1, 129.8, 128.6, 128.4, 128.2, 127.7, 127.1, 126.8, 126.6, 126.2, 123.4, 121.2, 38.9, 38.3, 35.9, 31.5, 21.0, 18.7, 17.7.

**HRMS (ESI):** *m/z* [M+H]<sup>+</sup> calcd for [C<sub>40</sub>H<sub>39</sub>N<sub>2</sub>O<sub>3</sub>]<sup>+</sup> required 595.2961, found 595.2944.

[α]<sub>D</sub><sup>20</sup> = -116.67 (c = 0.05, CH<sub>2</sub>Cl<sub>2</sub>).

**HPLC Condition:** The enantiomeric excess and dr value were determined by HPLC analysis on a Daicel Chiralcel AD-H, Hexanes/IPA = 94/6, 1.0 mL/min, λ = 254 nm. *t* (minor) = 17.327 min, *t* (major) = 10.884 min.

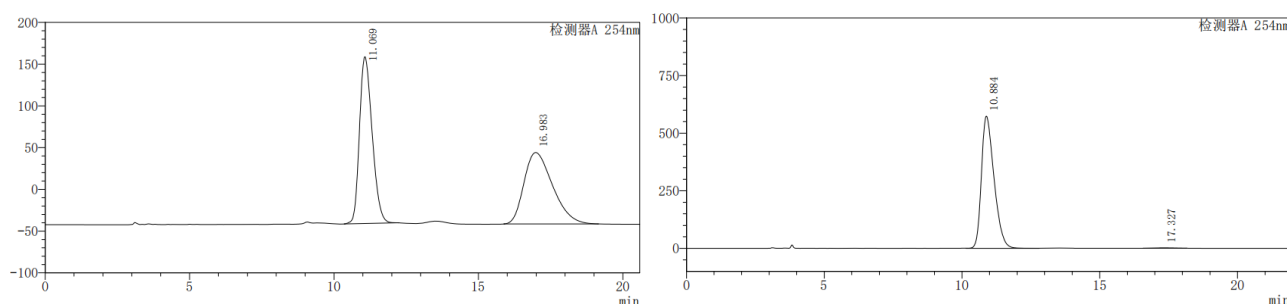

| Peak | Ret. Time | Area    | Height | Area%  |
|------|-----------|---------|--------|--------|
| 1    | 11.069    | 6101320 | 199836 | 50.876 |
| 2    | 16.983    | 5891267 | 85588  | 49.124 |

| Peak | Ret. Time | Area     | Height | Area%  |
|------|-----------|----------|--------|--------|
| 1    | 10.884    | 18283174 | 573954 | 99.558 |
| 2    | 17.327    | 81191    | 573954 | 0.442  |

**(*S*<sub>a,C-O</sub>,*S*<sub>a,C-N</sub>)-4-((3-(tert-butyl)-5-methyl-[1,1'-biphenyl]-2-yl)oxy)-3-(1-hydroxycyclopentyl)-2-(7-methylquinolin-8-yl)isoquinolin-1(2H)-one (5zb)**

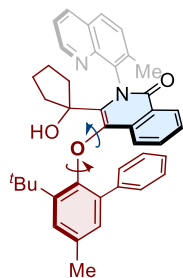

(PE:EA = 2:1) White solid. (43.2 mg, 71% yield, >20:1 dr, 99% ee). mp: 103–104 °C. mp: 103–104 °C.

**<sup>1</sup>H NMR (600 MHz, CDCl<sub>3</sub>)** δ 8.99 (dd, *J* = 4.2, 1.7 Hz, 1H), 8.19 (dd, *J* = 8.3, 1.7 Hz, 1H), 8.15 – 7.98 (m, 1H), 7.78 (d, *J* = 8.3 Hz, 1H), 7.50 – 7.34 (m, 6H), 7.23 (tt, *J* = 7.5, 1.3 Hz, 1H), 7.08 (s, 2H), 6.63 (dd, *J* = 2.3, 0.9 Hz, 3H), 4.17 (s, 1H), 2.75 – 2.59 (m, 1H), 2.33 (s, 3H), 2.14 (ddd, *J* = 12.7, 4.9, 2.5 Hz, 1H), 1.97 (s, 3H), 1.73 – 1.69 (m, 1H), 1.65 (s, 9H), 1.59 – 1.56 (m, 2H), 1.46 – 1.35 (m, 2H), 1.13 – 1.05 (m, 1H).

**<sup>13</sup>C NMR (151 MHz, CDCl<sub>3</sub>)** δ 162.3, 150.7, 150.6, 146.8, 139.1, 138.6, 138.5, 138.1, 136.7, 134.8, 134.7, 133.1, 132.8, 131.9, 131.2 (2C), 129.9, 128.6, 128.4, 128.2, 127.4, 127.0, 126.9, 126.6, 126.3, 123.8, 121.0, 82.7, 41.6, 40.3, 36.0, 31.6, 23.0, 22.1, 20.9, 18.4, 14.2.

**HRMS (ESI):** *m/z* [M+H]<sup>+</sup> calcd for [C<sub>41</sub>H<sub>41</sub>N<sub>2</sub>O<sub>3</sub>]<sup>+</sup> required 609.3117, found 609.3044.

[α]<sub>D</sub><sup>20</sup> = -156.67 (c = 0.05, CH<sub>2</sub>Cl<sub>2</sub>).

**HPLC Condition:** The enantiomeric excess and dr value were determined by HPLC analysis on a Daicel Chiralcel AD-H, Hexanes/IPA = 94/6, 1.0 mL/min, λ = 254 nm. *t* (minor) = 8.233 min, *t* (major) = 9.492 min.

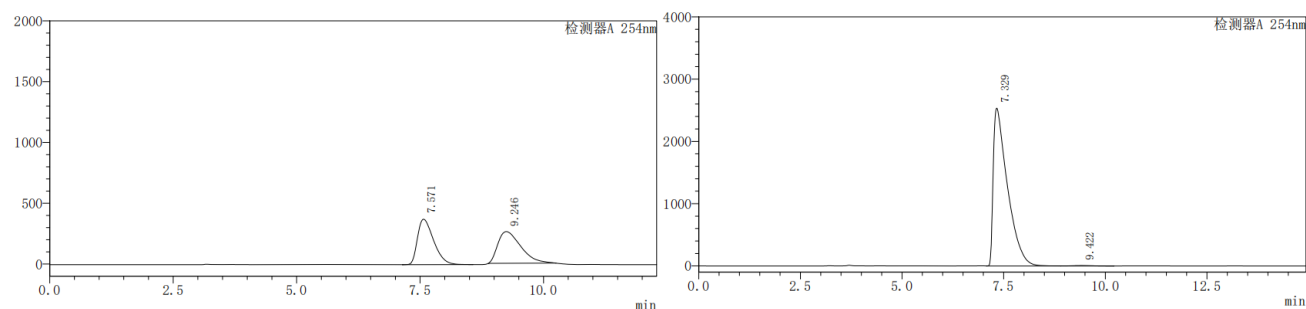

| Peak | Ret. Time | Area    | Height | Area%  |
|------|-----------|---------|--------|--------|
| 1    | 7.571     | 8496101 | 373738 | 50.288 |
| 2    | 9.246     | 8398626 | 260574 | 49.712 |

| Peak | Ret. Time | Area     | Height  | Area%  |
|------|-----------|----------|---------|--------|
| 1    | 7.329     | 61676844 | 2535837 | 99.504 |
| 2    | 9.422     | 307418   | 7918    | 0.496  |

**(*S*<sub>a,C-O</sub>,*S*<sub>a,C-N</sub>)-4-((3-(tert-butyl)-5-methyl-[1,1'-biphenyl]-2-yl)oxy)-3-(2-hydroxypropan-2-yl)-2-(7-methylquinolin-8-yl)isoquinolin-1(2H)-one (5zc)**

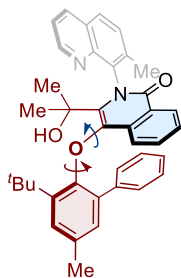

(PE:EA = 2:1) White solid. (47.2 mg, 81% yield, >20:1 dr, 95% ee). mp: 112–113 °C.

**<sup>1</sup>H NMR (600 MHz, CDCl<sub>3</sub>)** δ 8.70 (dd, *J* = 4.2, 1.7 Hz, 1H), 8.39 – 8.32 (m, 1H), 8.09 (dd, *J* = 8.2, 1.7 Hz, 1H), 7.77 (d, *J* = 8.4 Hz, 1H), 7.48 – 7.39 (m, 3H), 7.35 (d, *J* = 5.8 Hz, 1H), 7.28 (dd, *J* = 8.2, 4.2 Hz, 1H), 7.23 (ddd, *J* = 6.9, 3.5, 1.7 Hz, 1H), 6.90 – 6.70 (m, 2H), 6.68 – 5.99 (m, 3H), 2.33 (s, 3H), 2.25 (s, 3H), 2.06 (s, 3H), 1.63 (s, 9H), -0.29 (s, 9H).

**<sup>13</sup>C NMR (151 MHz, CDCl<sub>3</sub>)** δ 161.7, 150.4, 150.3, 147.6, 138.7, 138.4, 138.2, 137.2, 135.9, 135.9, 133.8, 133.0 (2C), 131.7, 131.4, 131.2, 129.8, 129.5, 128.4, 128.3, 127.8, 126.9, 126.6, 126.5, 126.4, 125.4, 122.6, 120.7, 73.4, 35.7, 32.6, 31.1, 29.5, 20.7, 18.4.

**HRMS (ESI):** *m/z* [M+H]<sup>+</sup> calcd for [C<sub>39</sub>H<sub>39</sub>N<sub>2</sub>O<sub>3</sub>]<sup>+</sup> required 583.2961, found 583.2961.

[α]<sub>D</sub><sup>20</sup> = -113.33 (c = 0.05, CH<sub>2</sub>Cl<sub>2</sub>).

**HPLC Condition:** The enantiomeric excess and dr value were determined by HPLC analysis on a Daicel Chiralcel AD-H, Hexanes/IPA = 94/6, 1.0 mL/min, λ = 254 nm. *t* (minor) = 7.504 min, *t* (major) = 11.116 min.

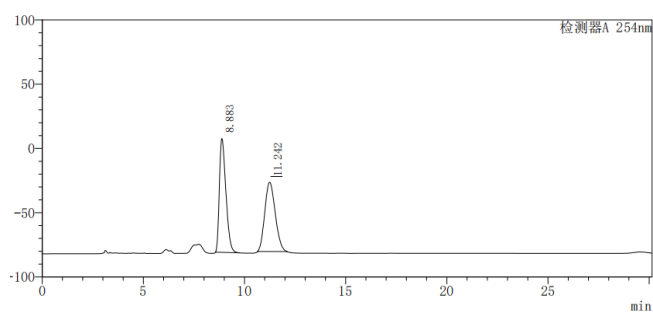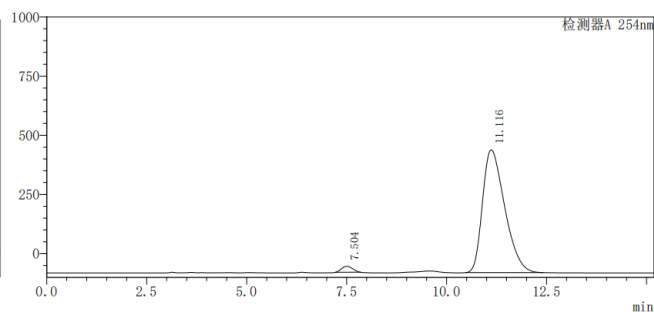

| Peak | Ret. Time | Area    | Height | Area%  |
|------|-----------|---------|--------|--------|
| 1    | 8.883     | 1978556 | 88604  | 50.629 |
| 2    | 11.242    | 1929429 | 53930  | 49.371 |

| Peak | Ret. Time | Area     | Height | Area%  |
|------|-----------|----------|--------|--------|
| 1    | 7.504     | 476310   | 25317  | 2.326  |
| 2    | 11.116    | 19998600 | 518781 | 97.674 |

**(*S*<sub>a,C-O</sub>,*S*<sub>a,C-N</sub>)-3-benzoyl-4-((3-(*tert*-butyl)-5-methyl-[1,1'-biphenyl]-2-yl)oxy)-2-(7-methylquinolin-8-yl)isoquinolin-1(2*H*)-one (**5zd**)**

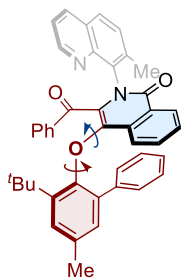

(PE:EA = 2:1) White solid. (51.2 mg, 82% yield, 14:1 dr, 99% ee). mp: 172–173 °C.

**<sup>1</sup>H NMR (600 MHz, CDCl<sub>3</sub>)** δ 8.59 (dd, *J* = 4.3, 1.4 Hz, 1H), 8.37 (d, *J* = 7.8 Hz, 1H), 7.99 – 7.79 (m, 3H), 7.59 (d, *J* = 8.4 Hz, 1H), 7.47 (t, *J* = 7.6 Hz, 1H), 7.45 – 7.41 (m, 2H), 7.28 (d, *J* = 7.4 Hz, 1H), 7.17 – 7.11 (m, 6H), 7.09 – 7.03 (m, 2H), 6.72 (d, *J* = 8.5 Hz, 2H), 6.65 (d, *J* = 2.1 Hz, 1H), 2.41 (s, 3H), 2.31 (s, 3H), 1.08 (s, 9H).

**<sup>13</sup>C NMR (151 MHz, CDCl<sub>3</sub>)** δ 189.7, 160.5, 150.7, 150.3, 144.1, 141.3, 139.8, 138.5, 136.6, 135.6, 134.7, 133.4 (2C), 133.3, 132.5, 132.0, 131.7, 131.5, 129.6, 129.4, 129.3, 129.2, 128.5, 127.8, 127.7, 127.6 (2C), 127.4, 127.2, 126.9, 126.4, 122.9, 120.6, 35.2, 30.0, 21.0, 20.2.

**HRMS (ESI):** *m/z* [M+NH<sub>4</sub>]<sup>+</sup> calcd for [C<sub>43</sub>H<sub>40</sub>N<sub>3</sub>O<sub>3</sub>]<sup>+</sup> required 646.3070, found 646.3033.

[α]<sub>D</sub><sup>20</sup> = -95 (c = 0.05, CH<sub>2</sub>Cl<sub>2</sub>).

**HPLC Condition:** The enantiomeric excess and dr value were determined by HPLC analysis on a Daicel Chiralcel AD-H, Hexanes/IPA = 94/6, 1.0 mL/min, λ = 254 nm. *t* (minor) = 17.279 min, *t* (major) = 11.701 min.

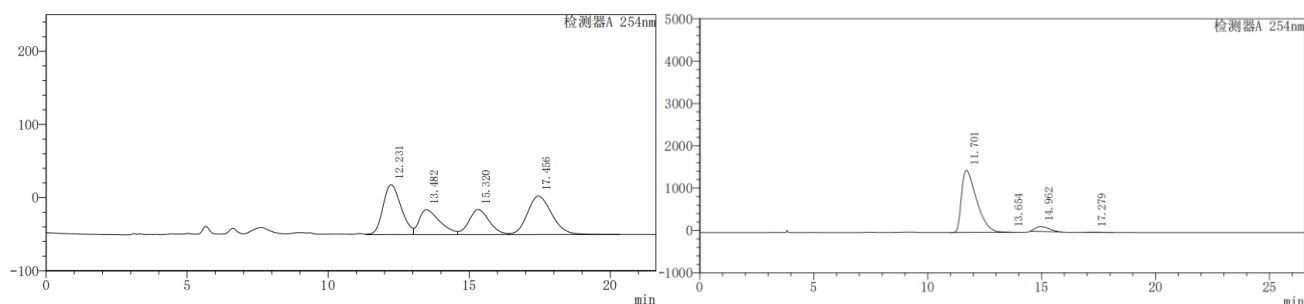

| Peak | Ret. Time | Area    | Height | Area%  |
|------|-----------|---------|--------|--------|
| 1    | 12.231    | 3036522 | 68299  | 31.547 |
| 2    | 13.482    | 1730465 | 34022  | 17.978 |
| 3    | 15.320    | 1708689 | 34246  | 17.752 |
| 4    | 17.456    | 3149602 | 52562  | 32.722 |

| Peak | Ret. Time | Area     | Height  | Area%  |
|------|-----------|----------|---------|--------|
| 1    | 11.701    | 67551640 | 1468965 | 92.848 |
| 2    | 13.654    | 48181    | 3875    | 0.066  |
| 3    | 14.962    | 4878686  | 114270  | 6.706  |
| 4    | 17.279    | 276491   | 5981    | 0.380  |

## 12. NMR spectra for new compounds

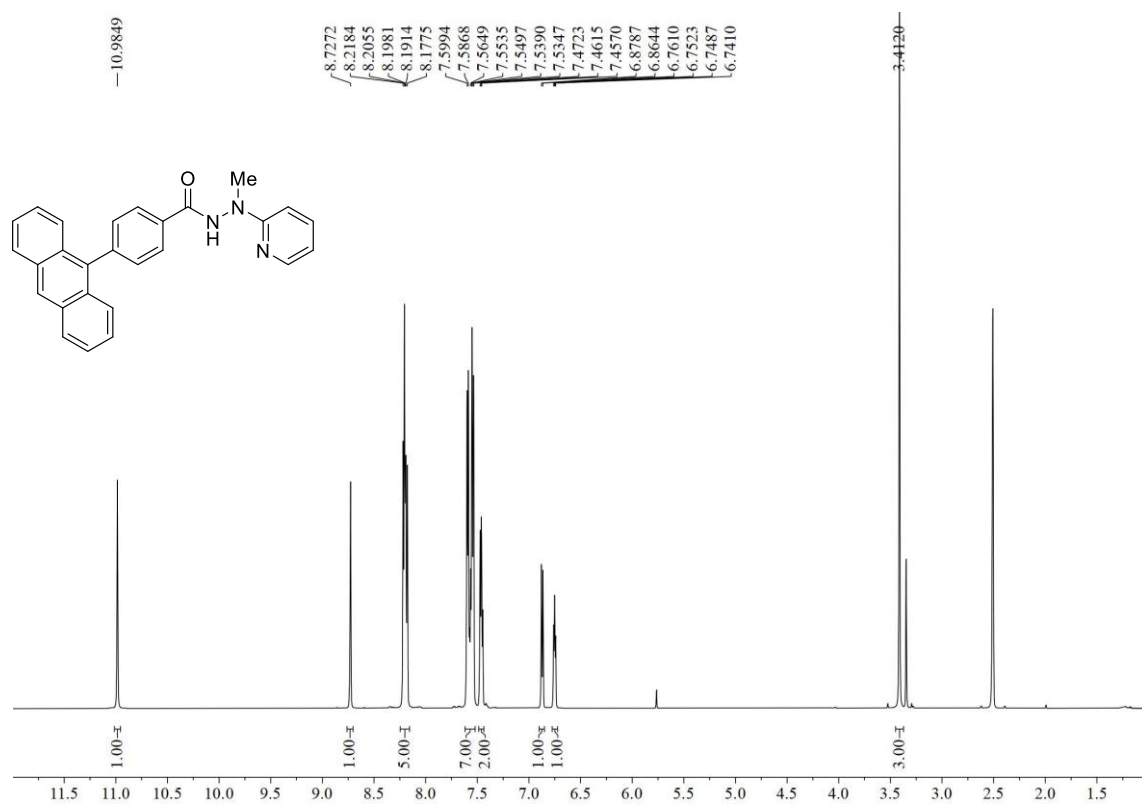

**<sup>1</sup>H NMR spectrum of 2l (600 MHz, CDCl<sub>3</sub>)**

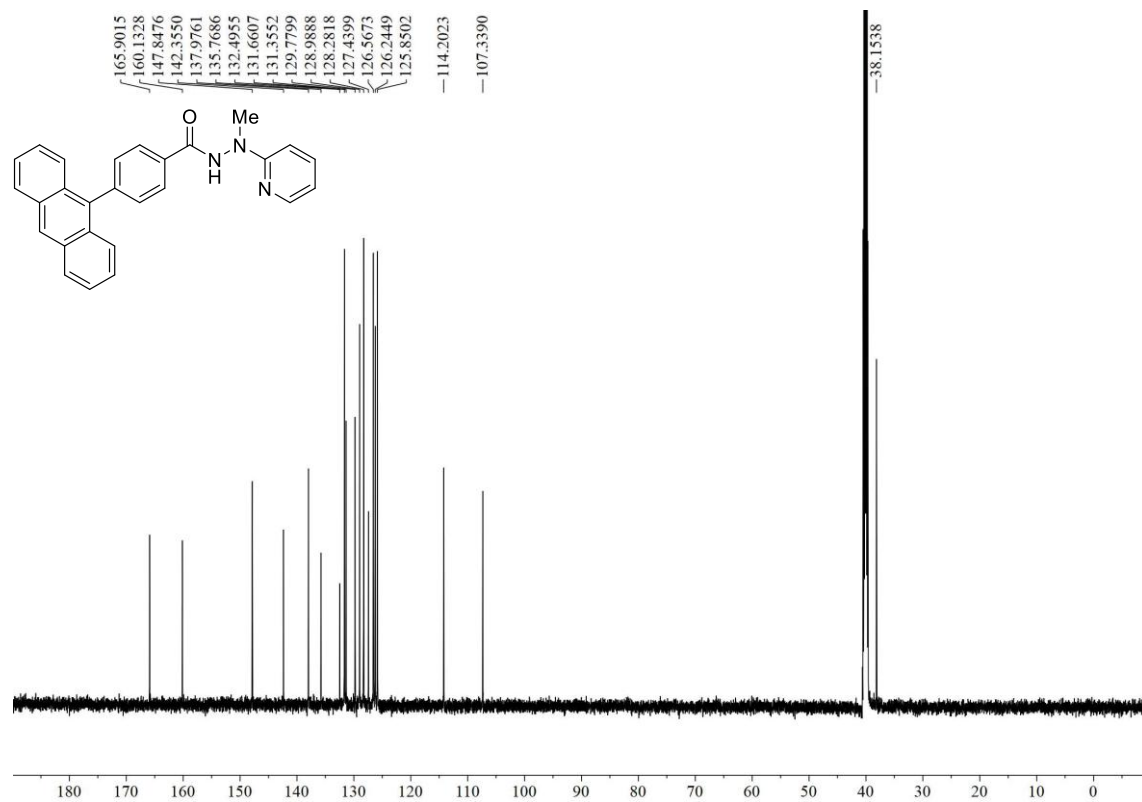

**<sup>13</sup>C NMR spectrum of 2l (151 MHz, CDCl<sub>3</sub>)**

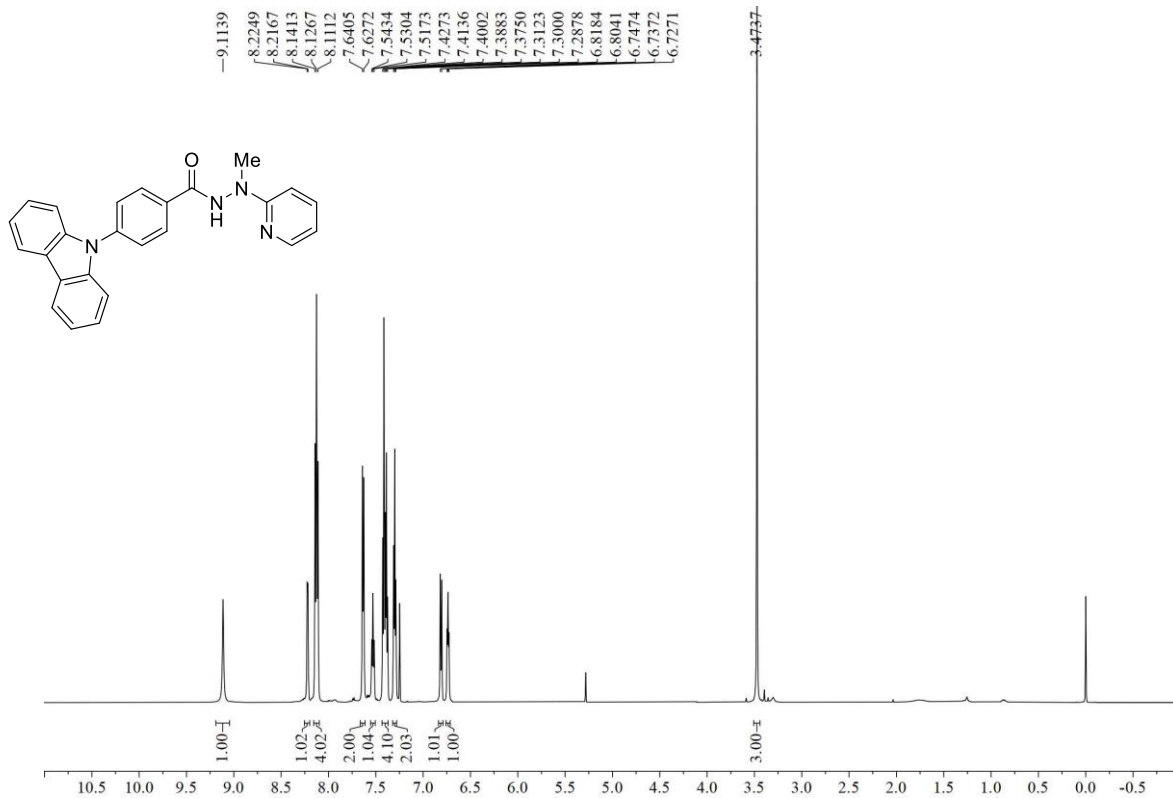

<sup>1</sup>H NMR spectrum of 2m (600 MHz, CDCl<sub>3</sub>)

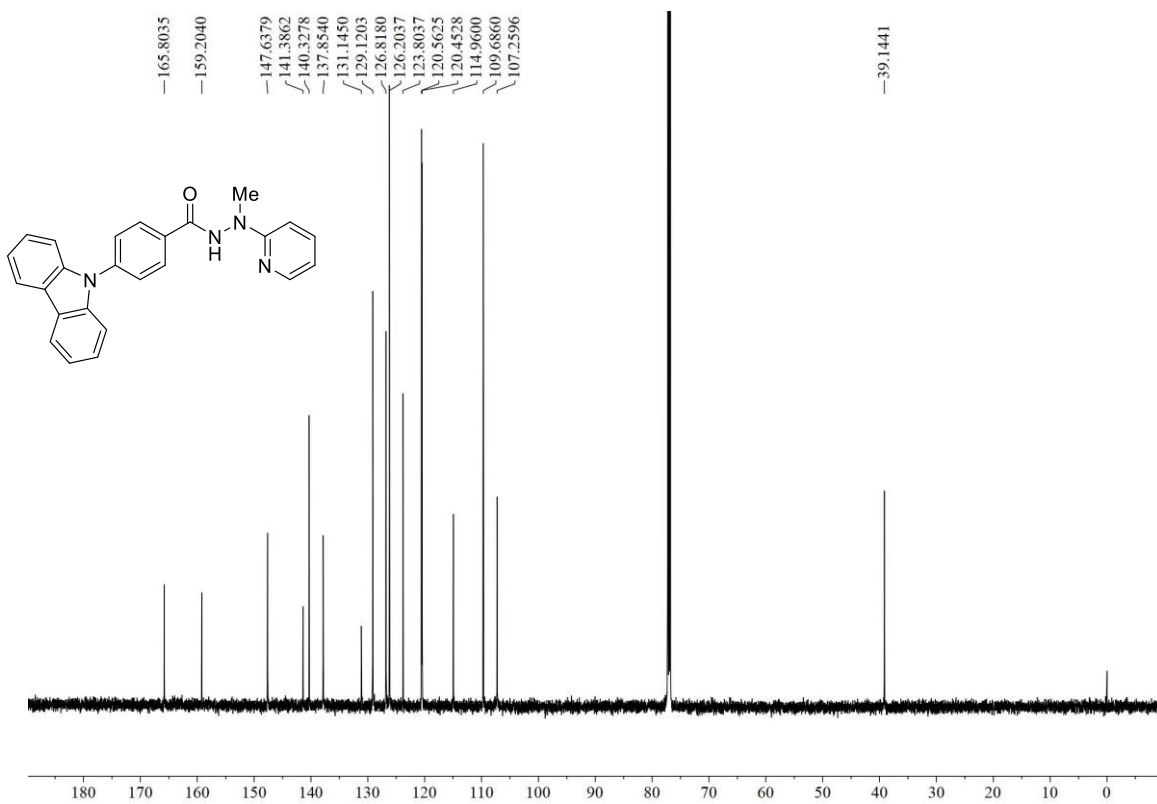

<sup>13</sup>C NMR spectrum of 2m (151 MHz, CDCl<sub>3</sub>)

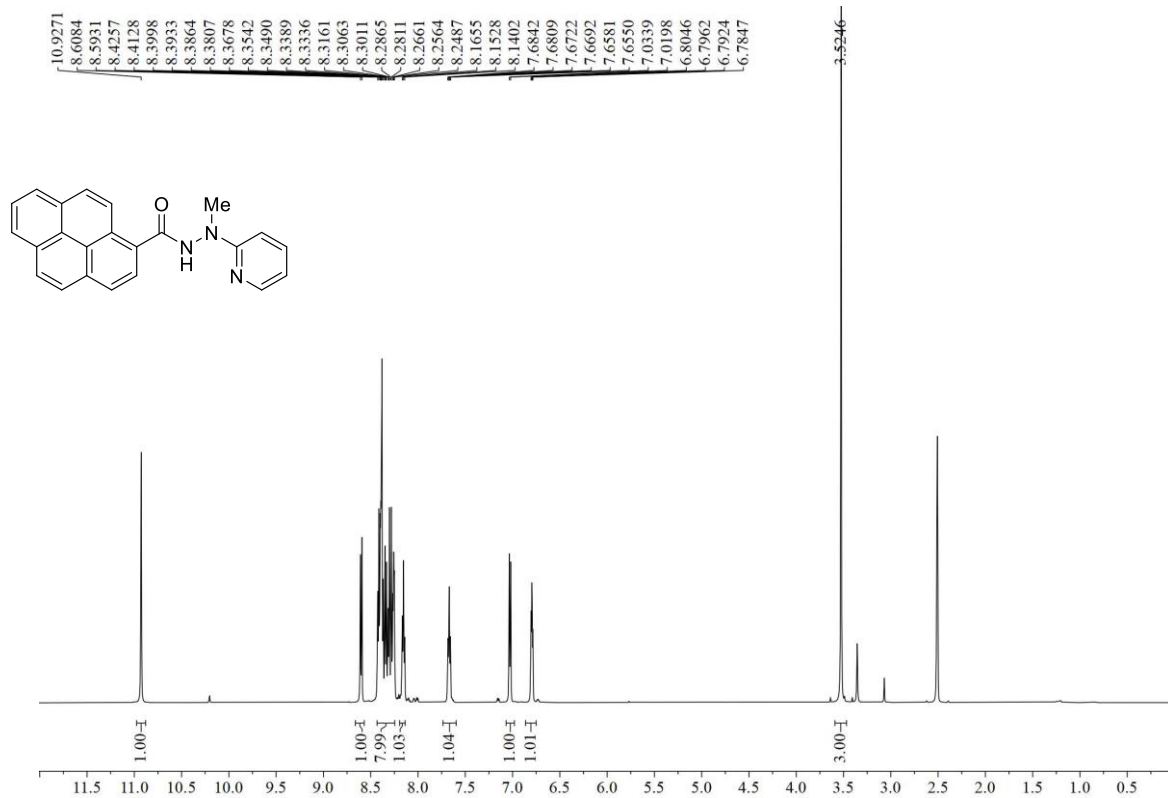

<sup>1</sup>H NMR spectrum of 2q (600 MHz, DMSO-*d*<sub>6</sub>)

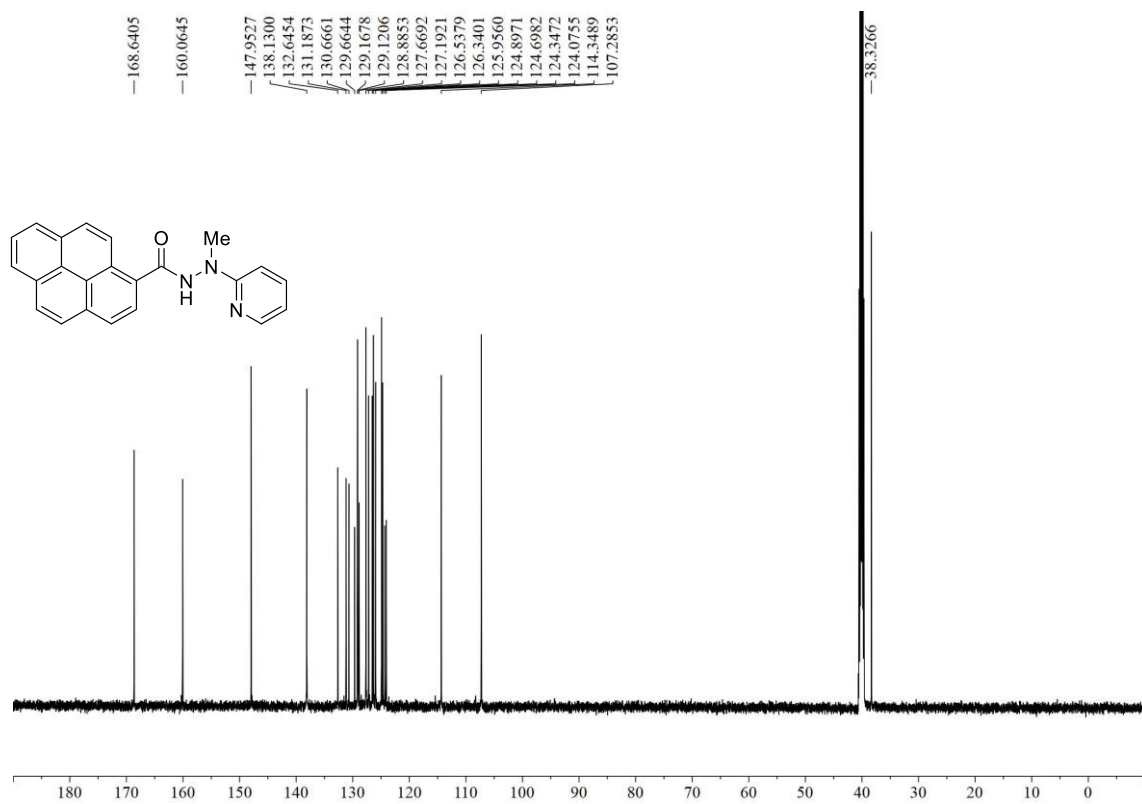

<sup>13</sup>C NMR spectrum of 2q (151 MHz, DMSO-*d*<sub>6</sub>)

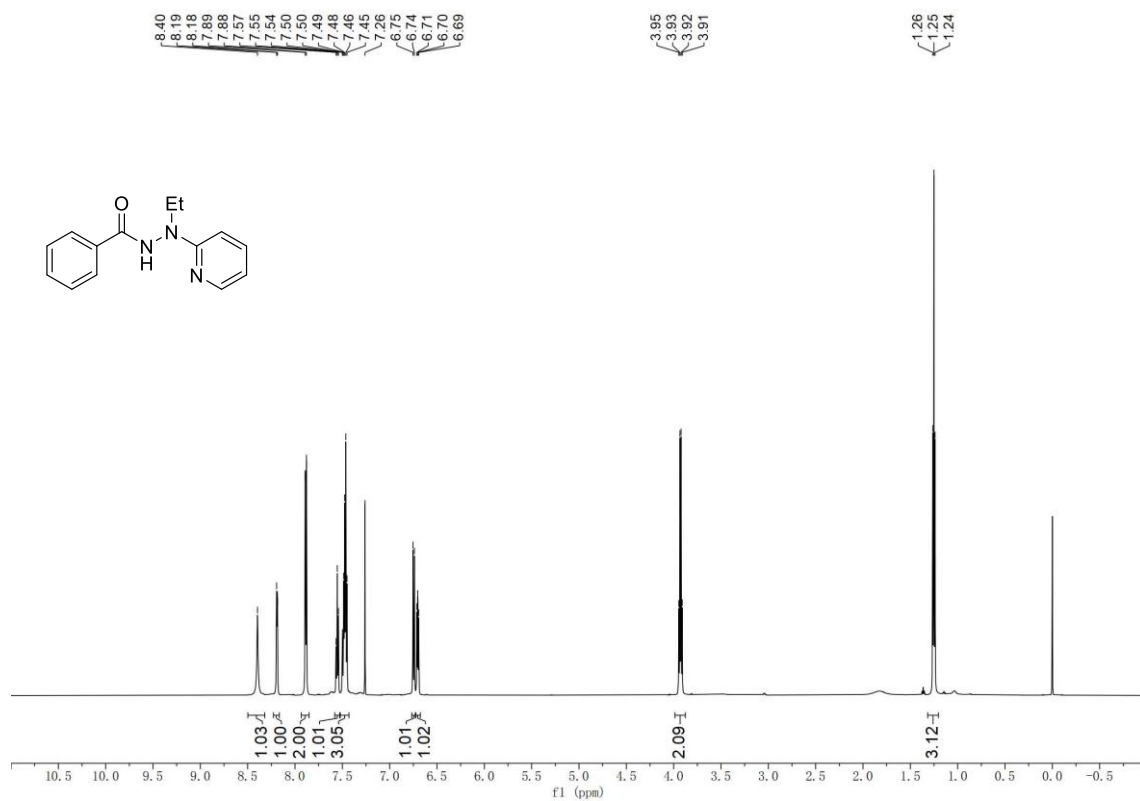

<sup>1</sup>H NMR spectrum of 2r (600 MHz, CDCl<sub>3</sub>)

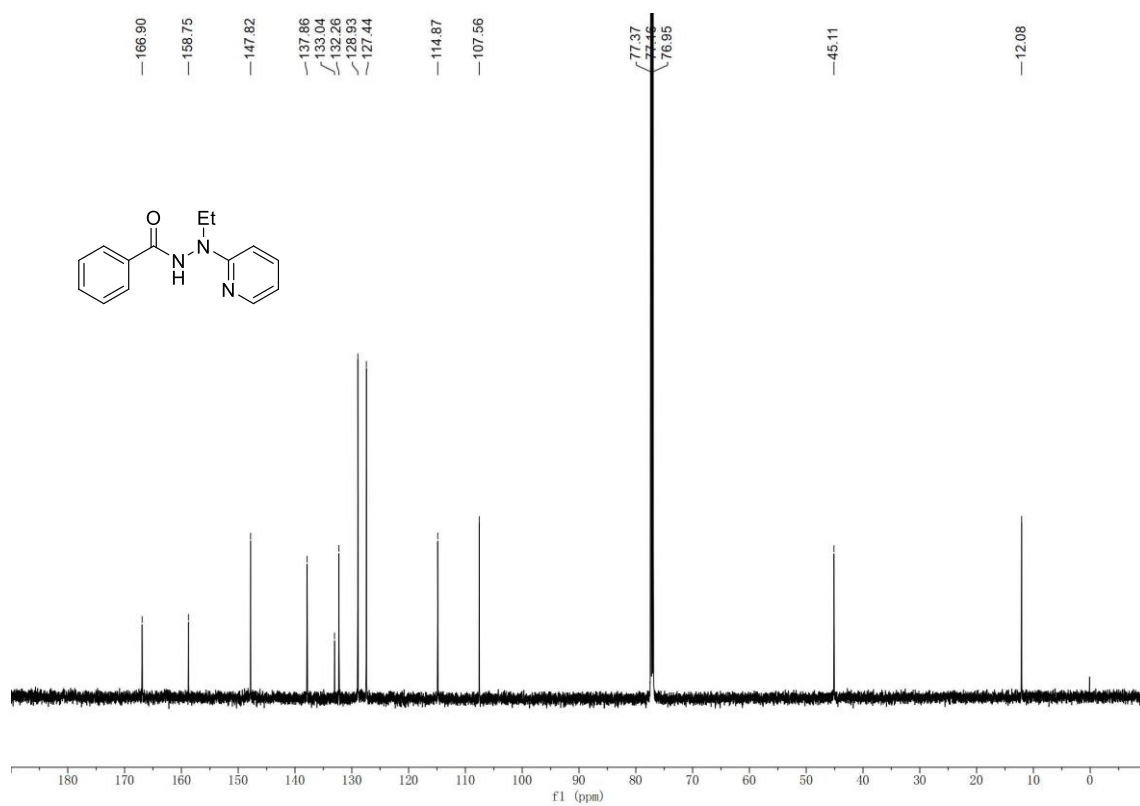

<sup>13</sup>C NMR spectrum of 2r (151 MHz, CDCl<sub>3</sub>)

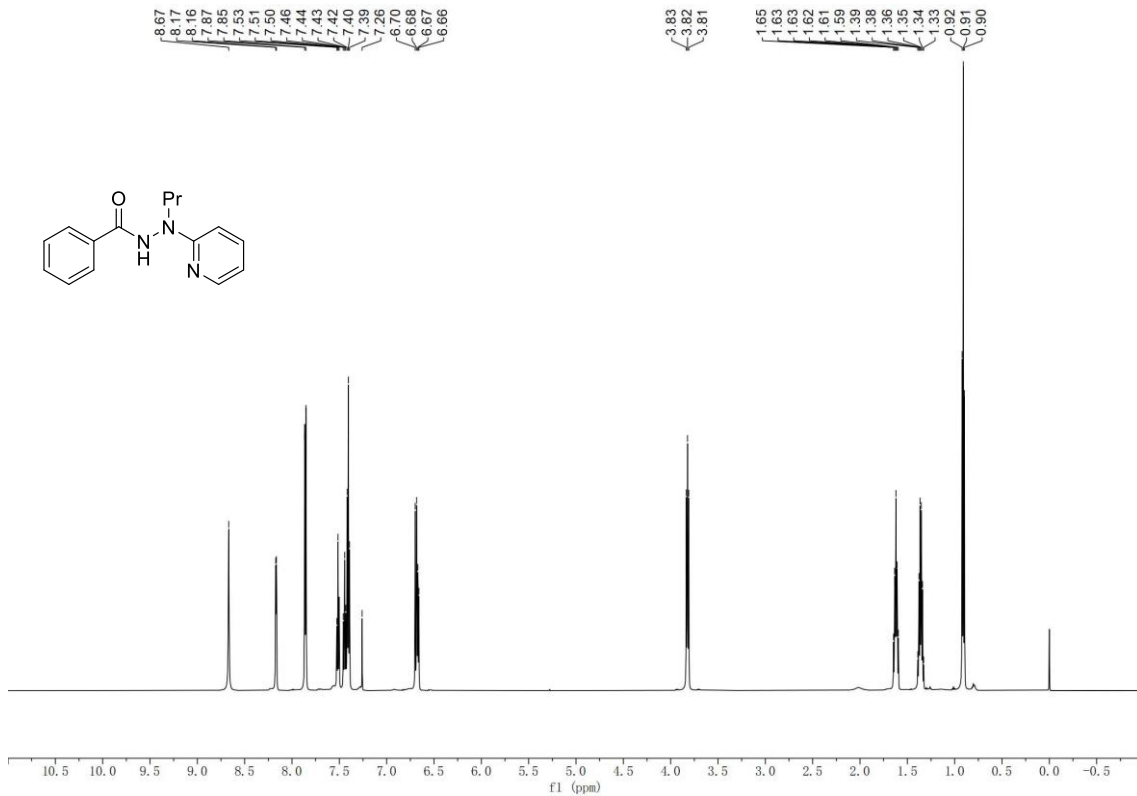

<sup>1</sup>H NMR spectrum of 2s (600 MHz, CDCl<sub>3</sub>)

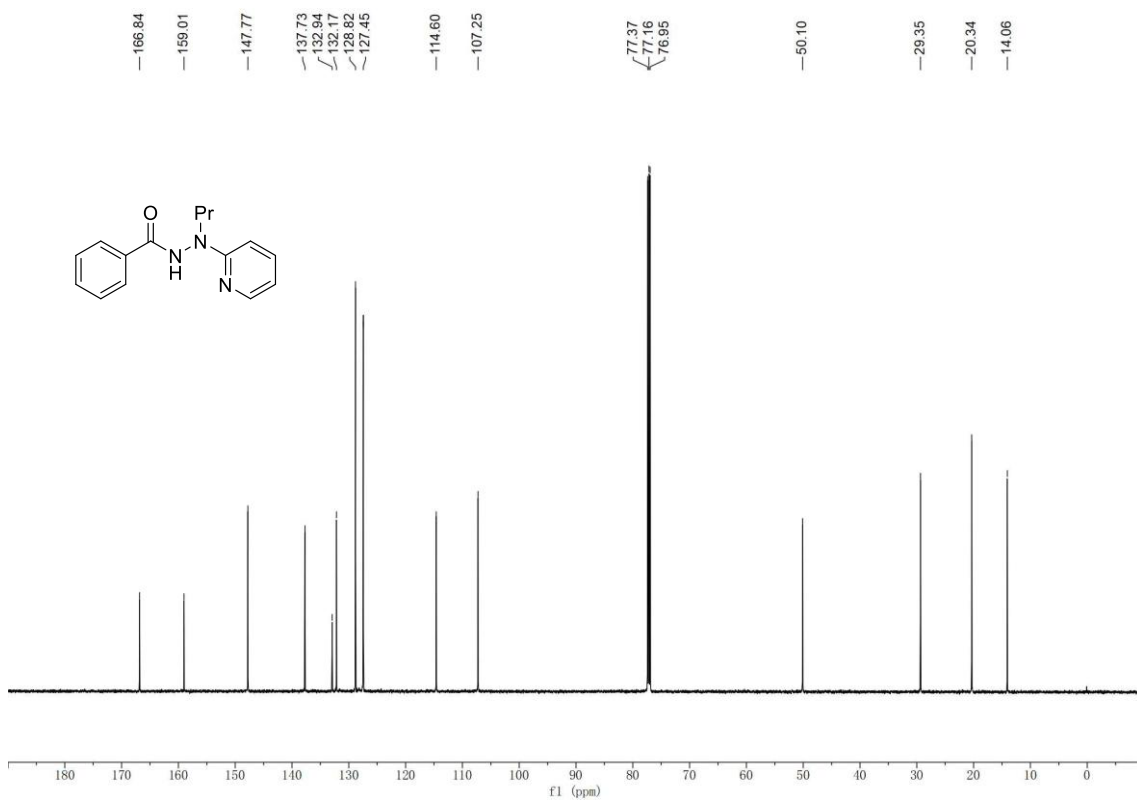

<sup>13</sup>C NMR spectrum of 2s (151 MHz, CDCl<sub>3</sub>)

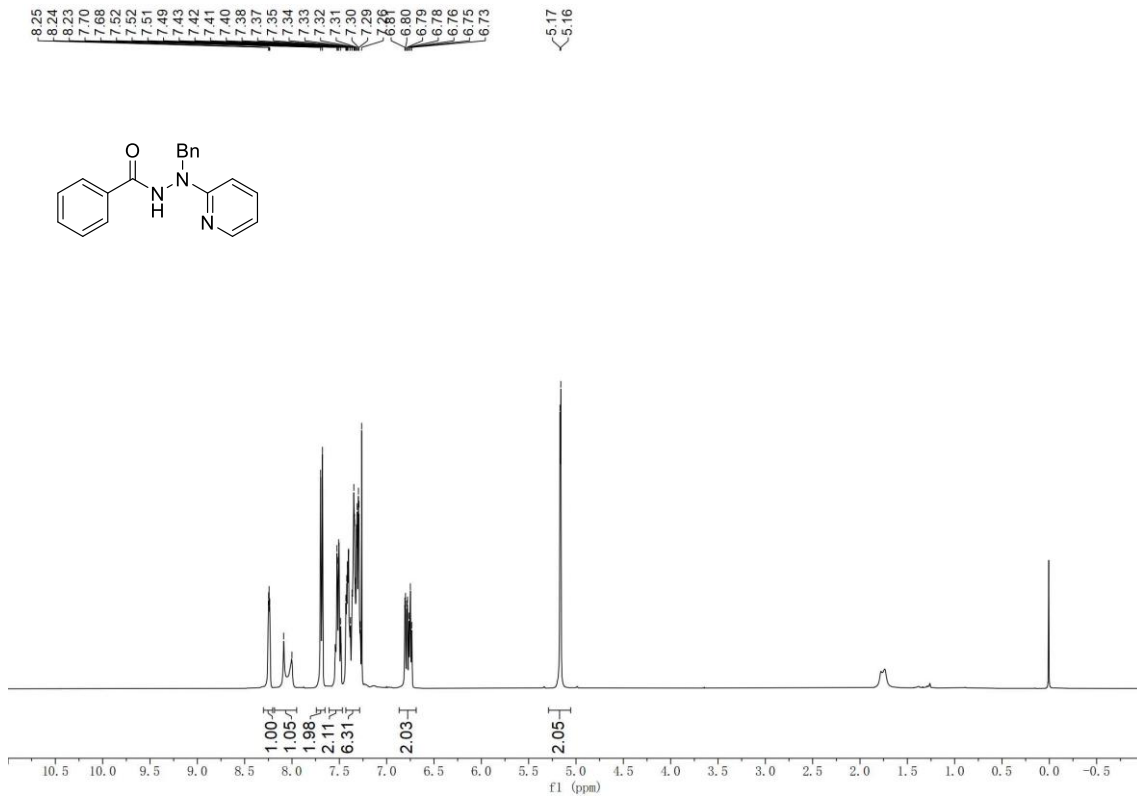

<sup>1</sup>H NMR spectrum of 2t (600 MHz, CDCl<sub>3</sub>)

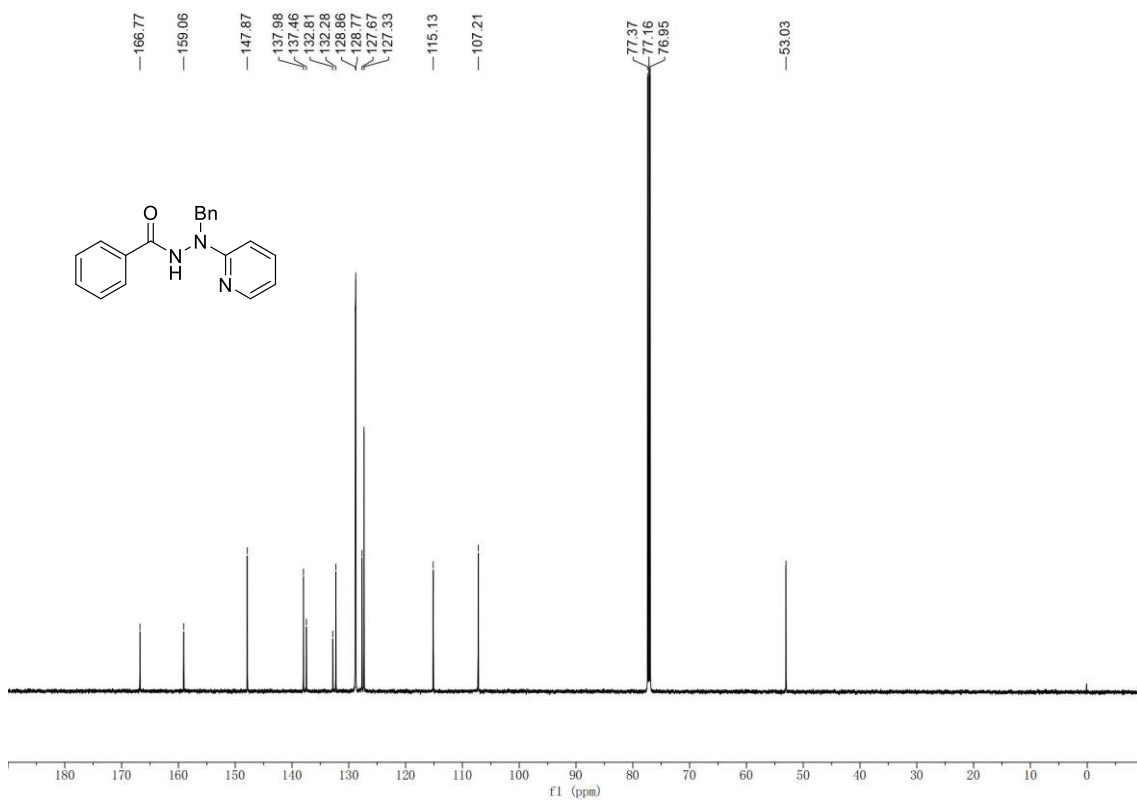

<sup>13</sup>C NMR spectrum of 2t (151 MHz, CDCl<sub>3</sub>)

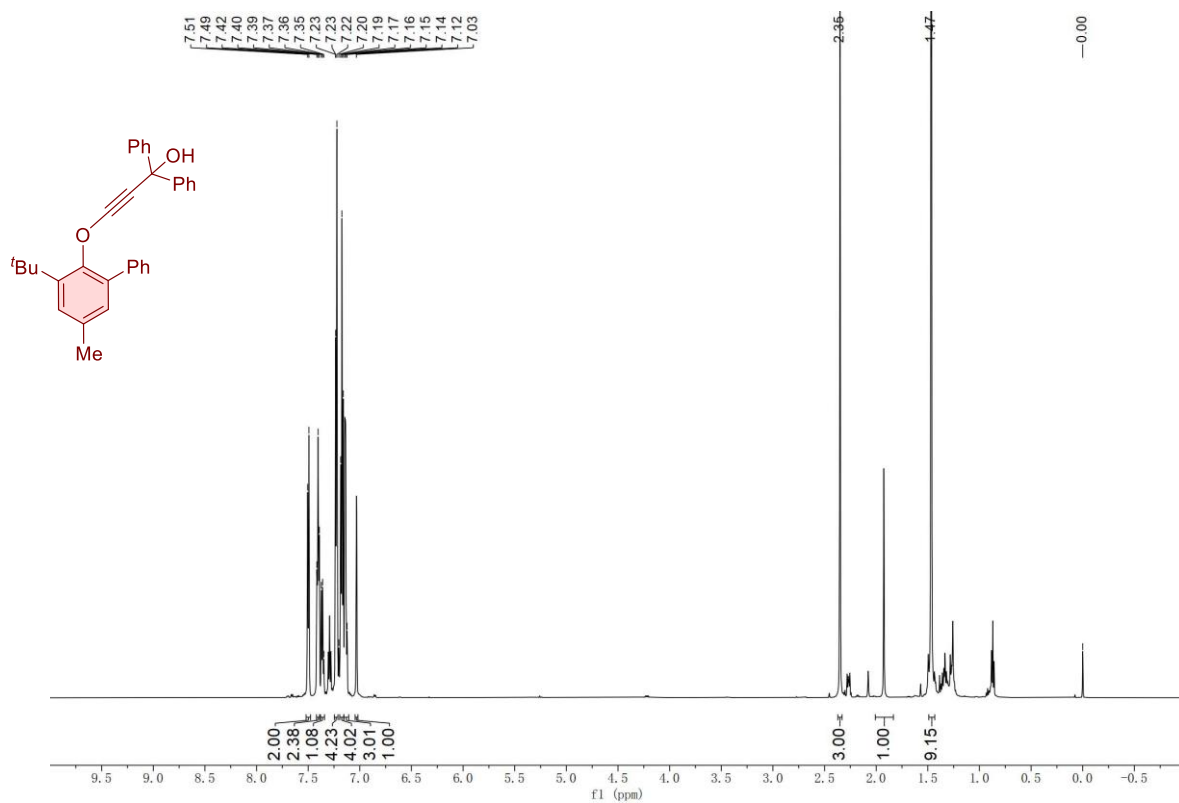

**<sup>1</sup>H NMR spectrum of 1a (600 MHz, CDCl<sub>3</sub>)**

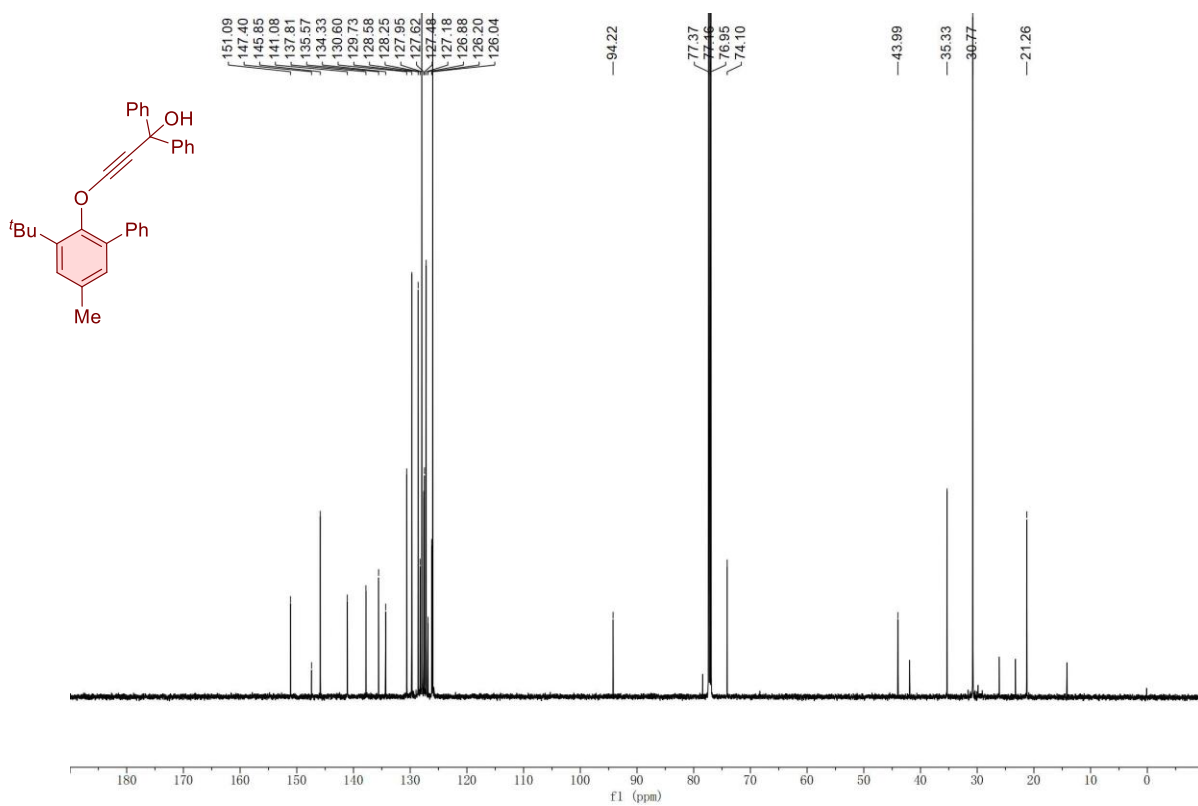

**<sup>13</sup>C NMR spectrum of 1a (151 MHz, CDCl<sub>3</sub>)**

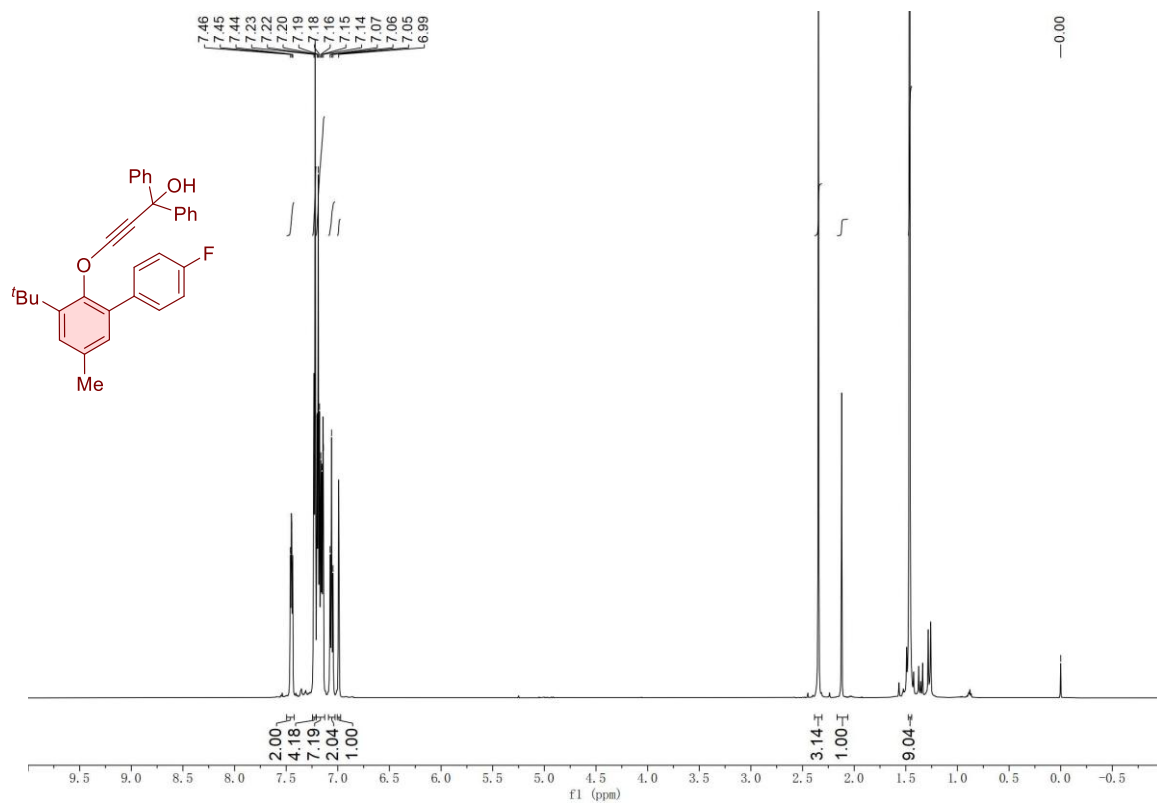

<sup>1</sup>H NMR spectrum of 1b (600 MHz, CDCl<sub>3</sub>)

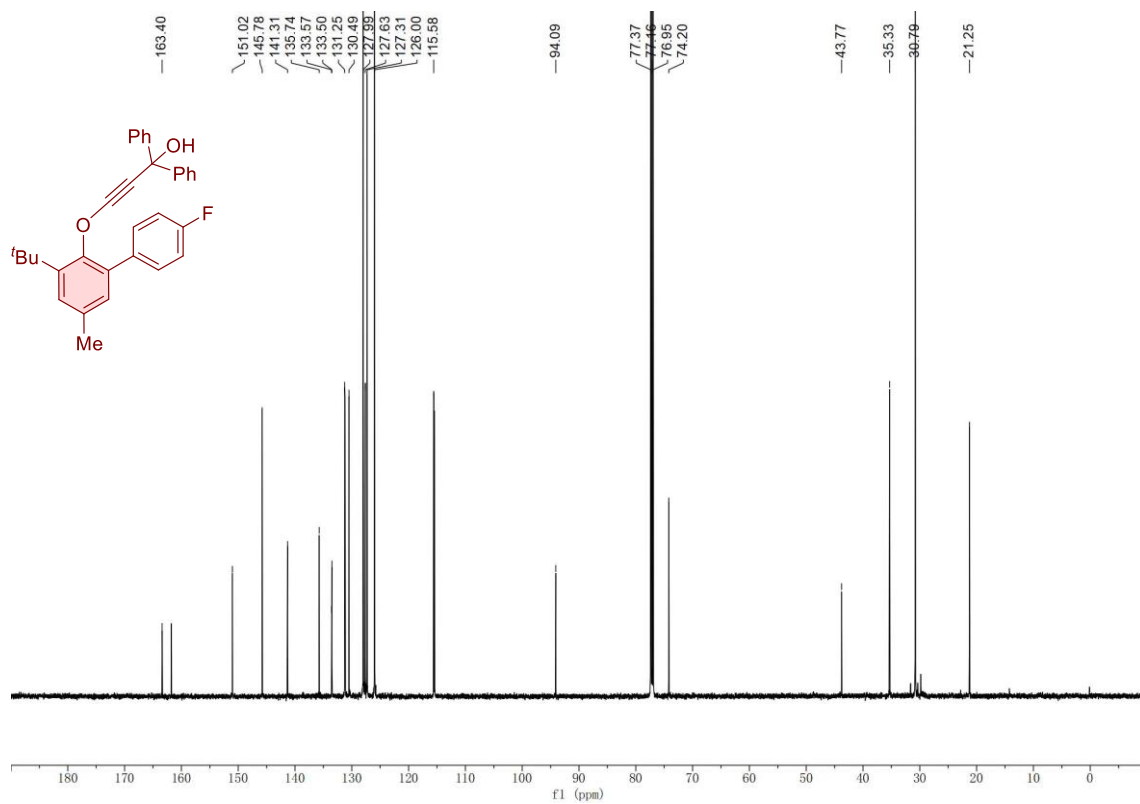

<sup>13</sup>C NMR spectrum of 1b (151 MHz, CDCl<sub>3</sub>)

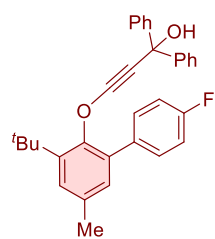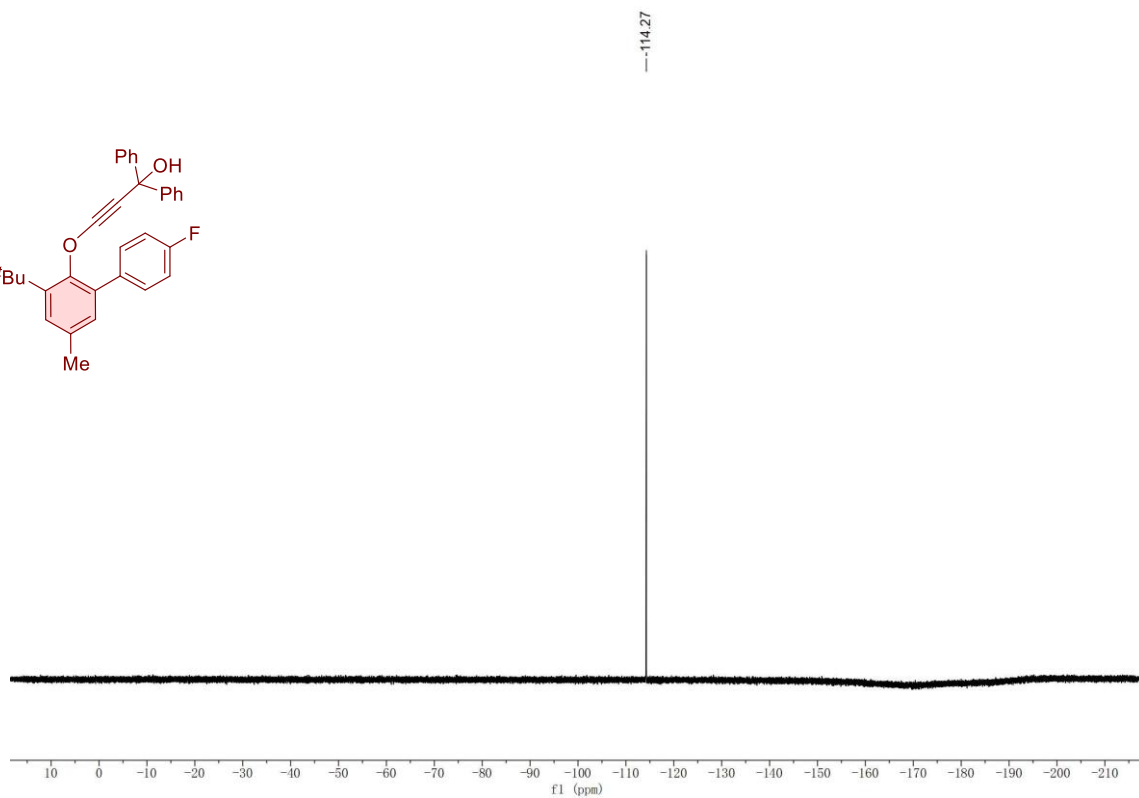

**<sup>19</sup>F NMR spectrum of 1b (565 MHz, CDCl<sub>3</sub>)**



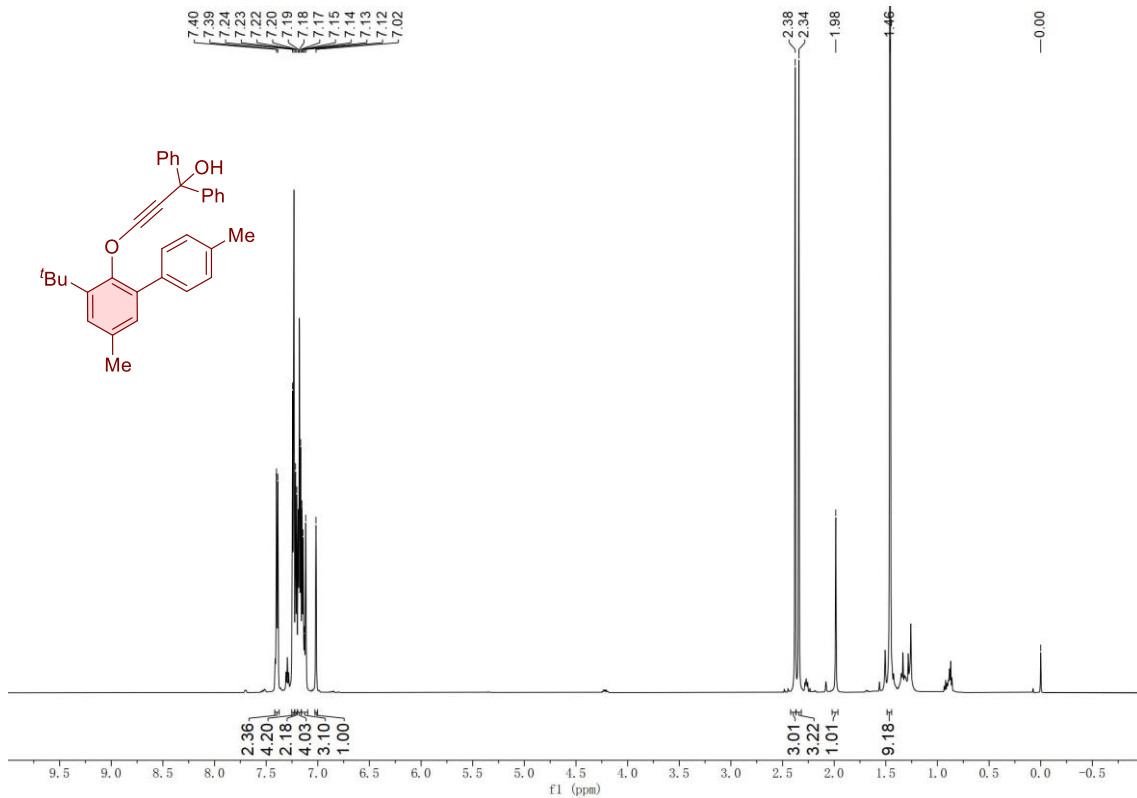

<sup>1</sup>H NMR spectrum of 1d (600 MHz, CDCl<sub>3</sub>)

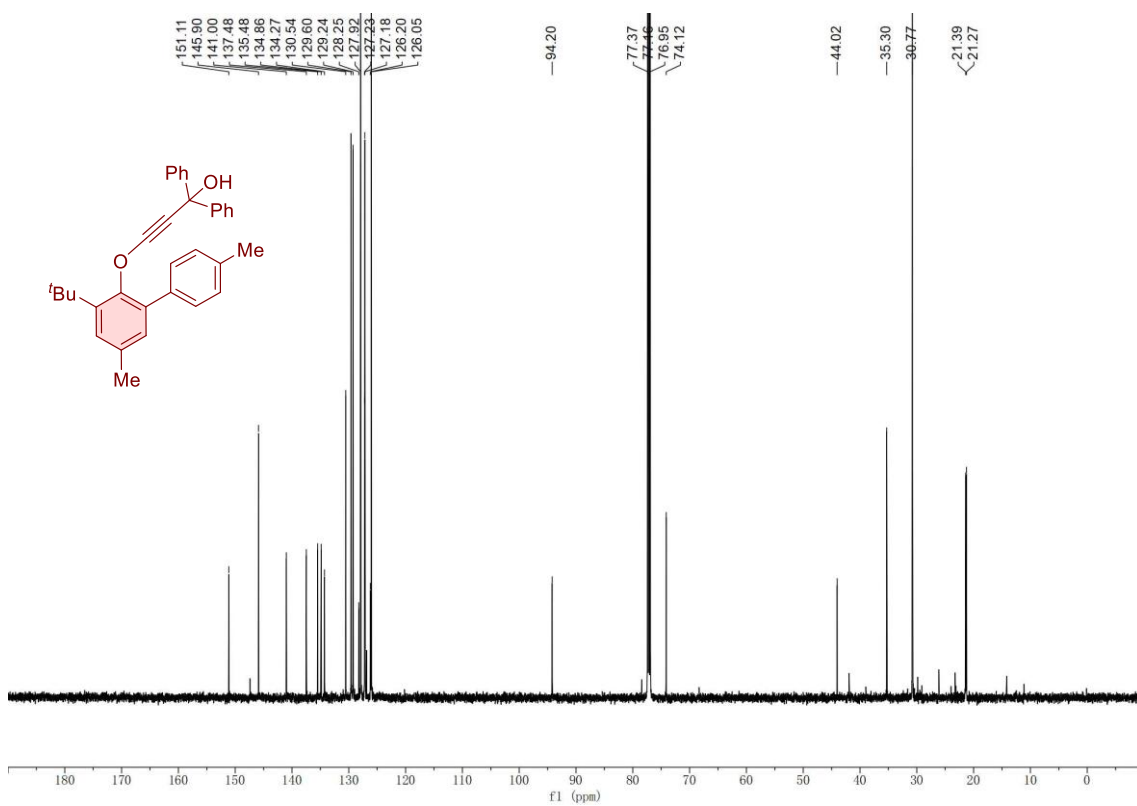

<sup>13</sup>C NMR spectrum of 1d (151 MHz, CDCl<sub>3</sub>)

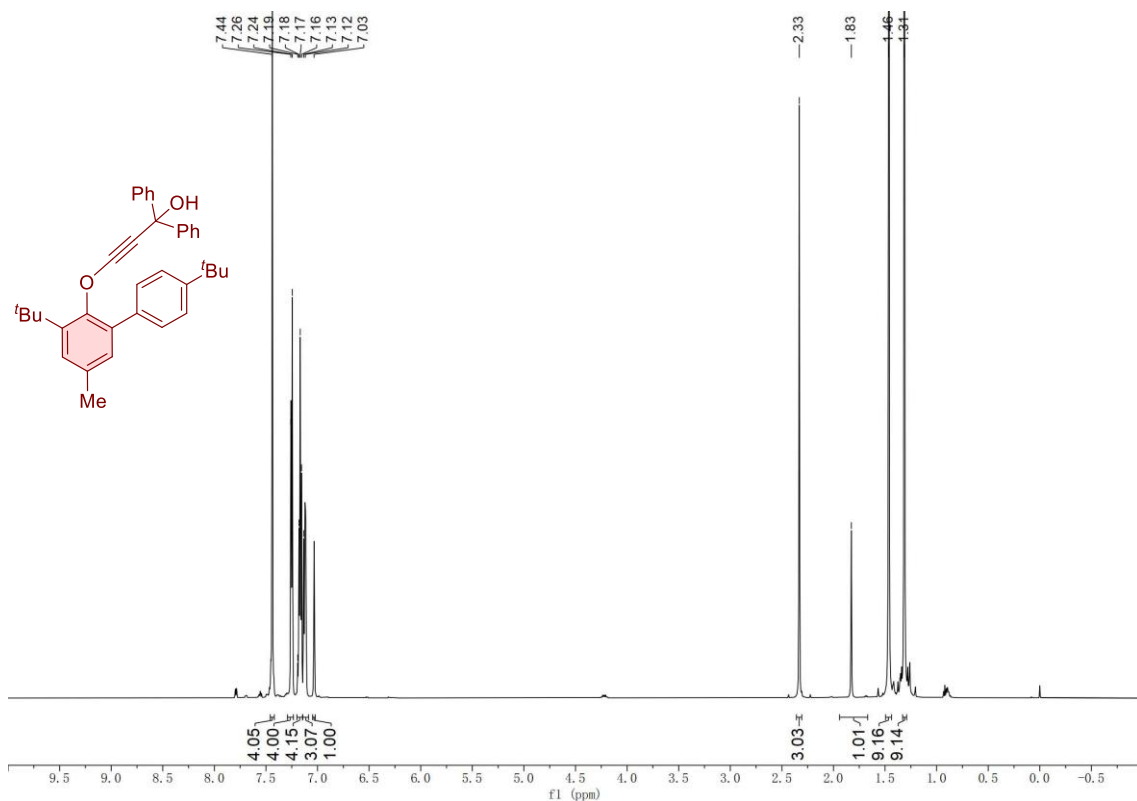

**<sup>1</sup>H NMR spectrum of 1e (600 MHz, CDCl<sub>3</sub>)**

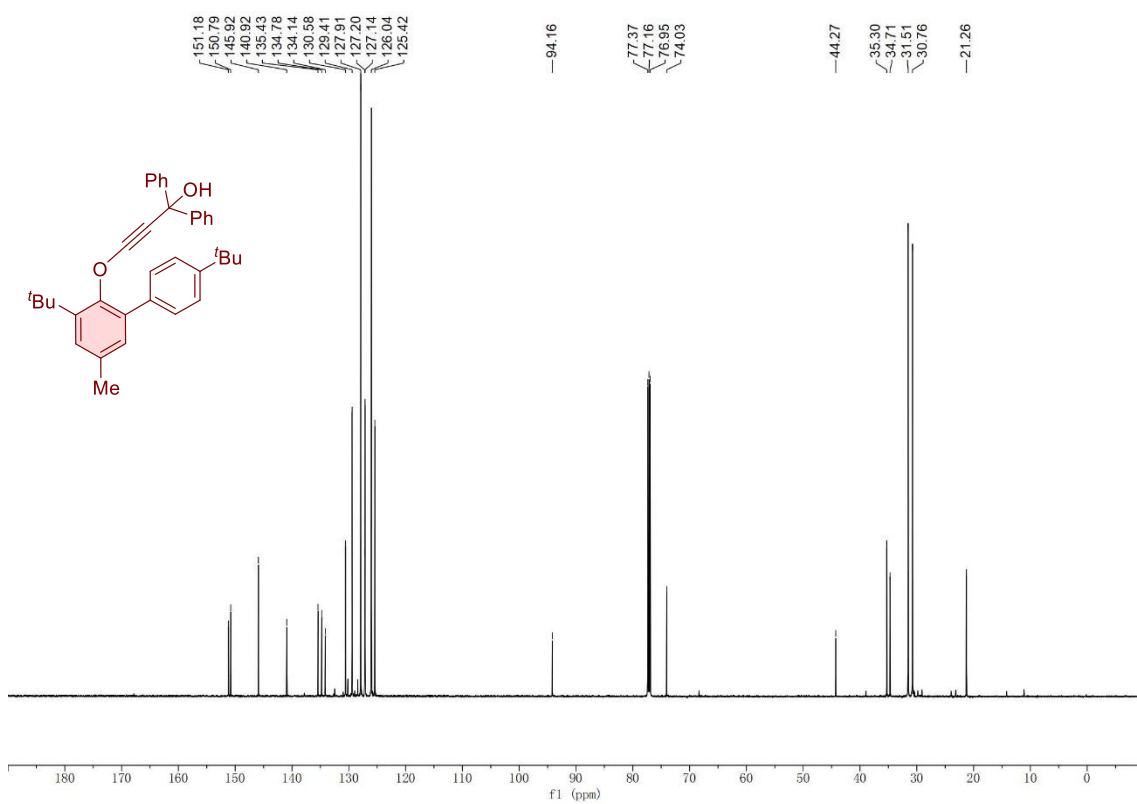

**<sup>13</sup>C NMR spectrum of 1e (151 MHz, CDCl<sub>3</sub>)**

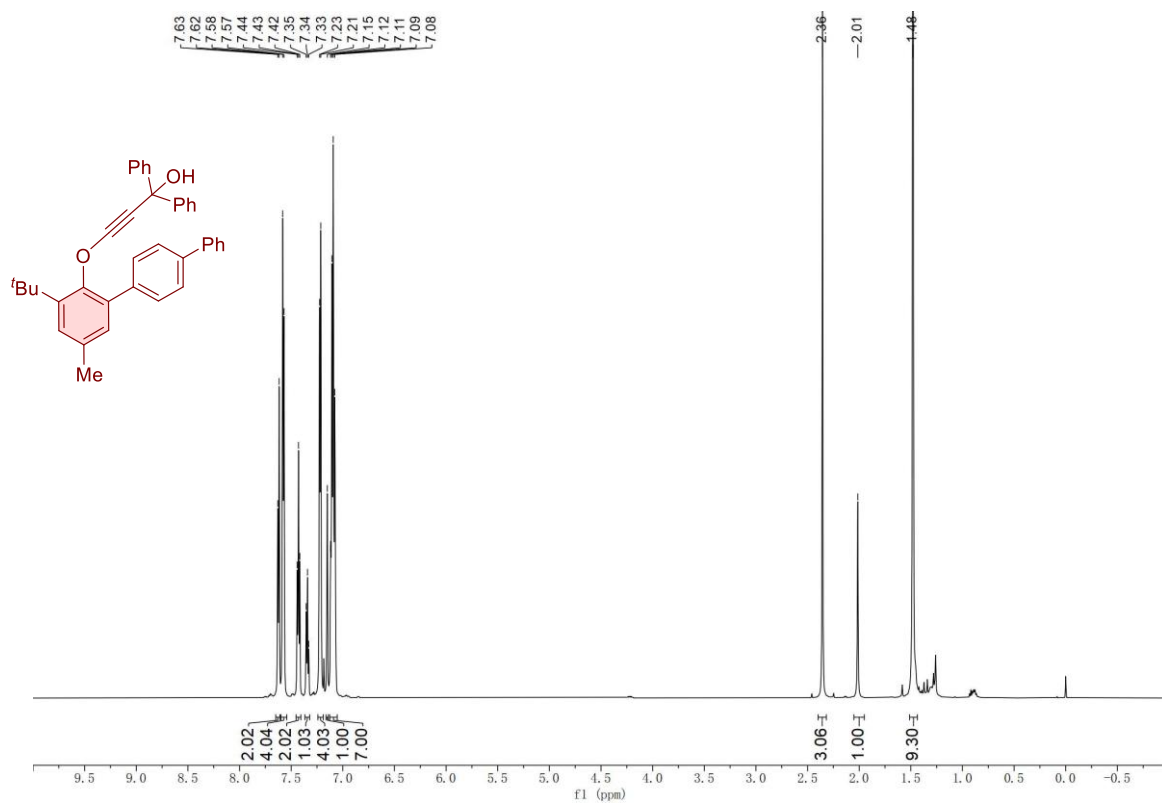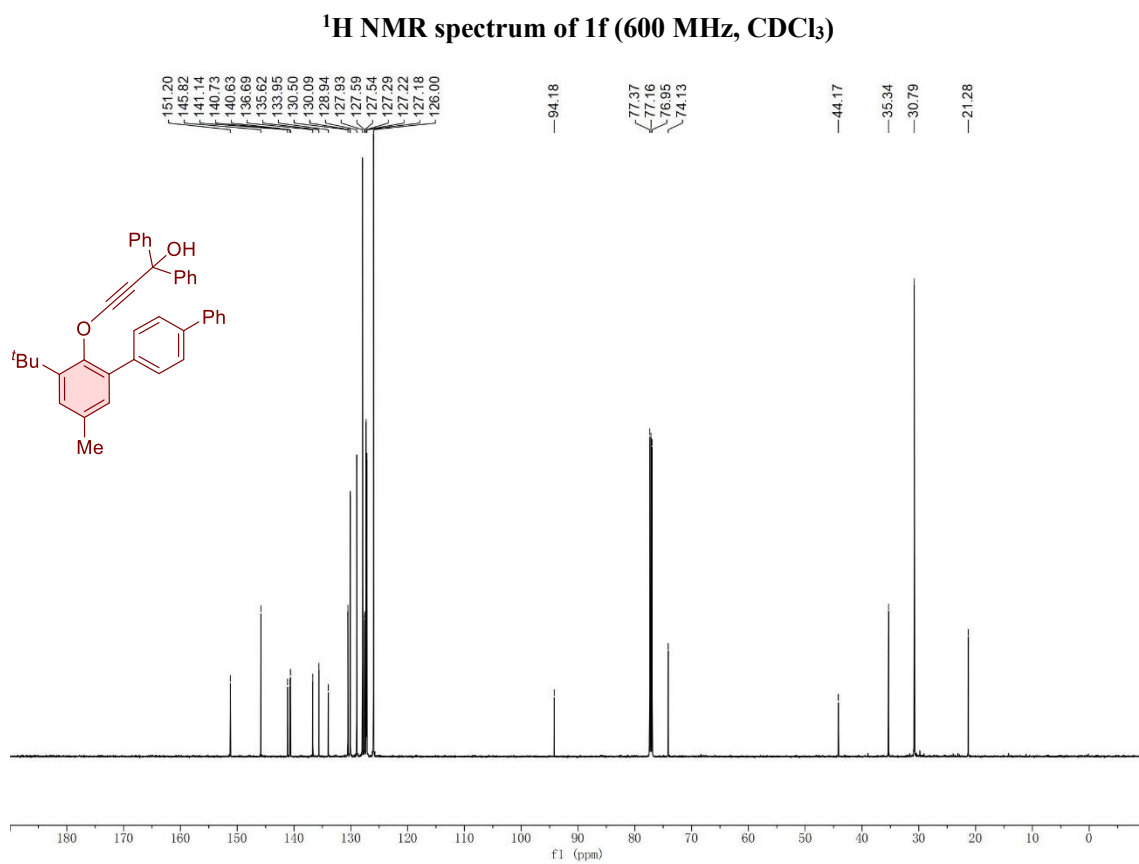

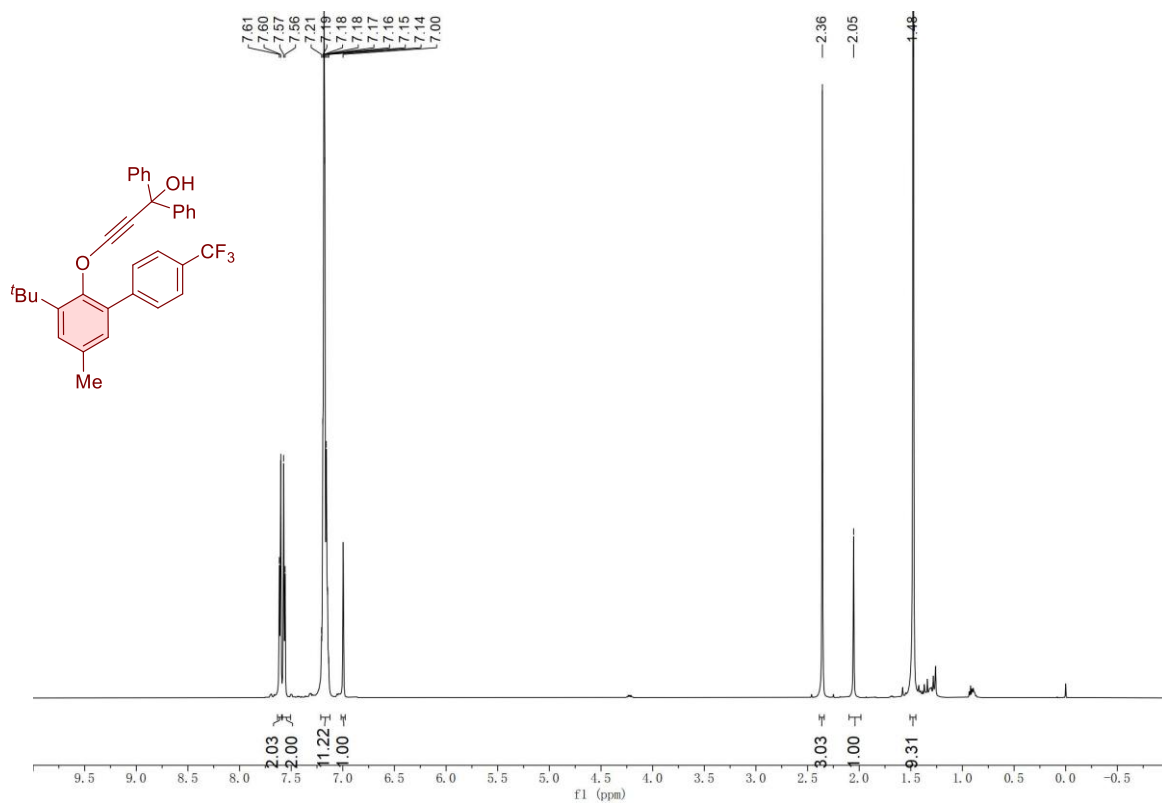

**<sup>1</sup>H NMR spectrum of 1g (600 MHz, CDCl<sub>3</sub>)**

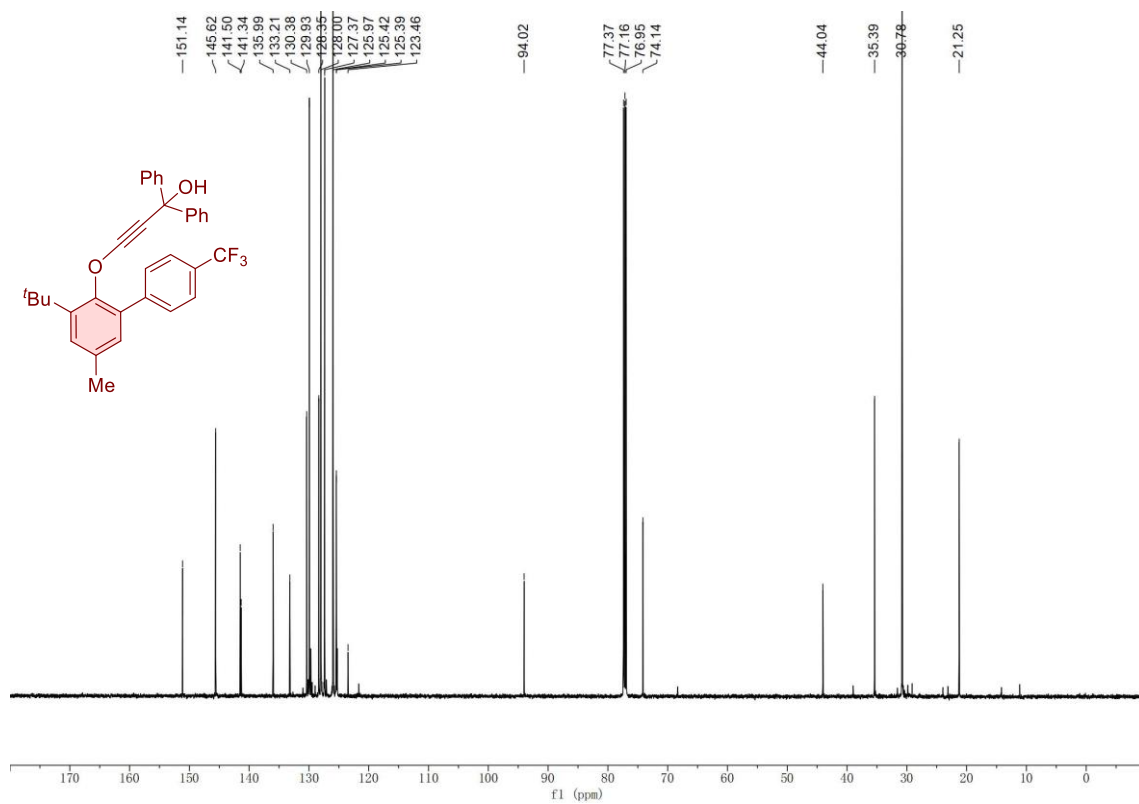

**<sup>13</sup>C NMR spectrum of 1g (151 MHz, CDCl<sub>3</sub>)**

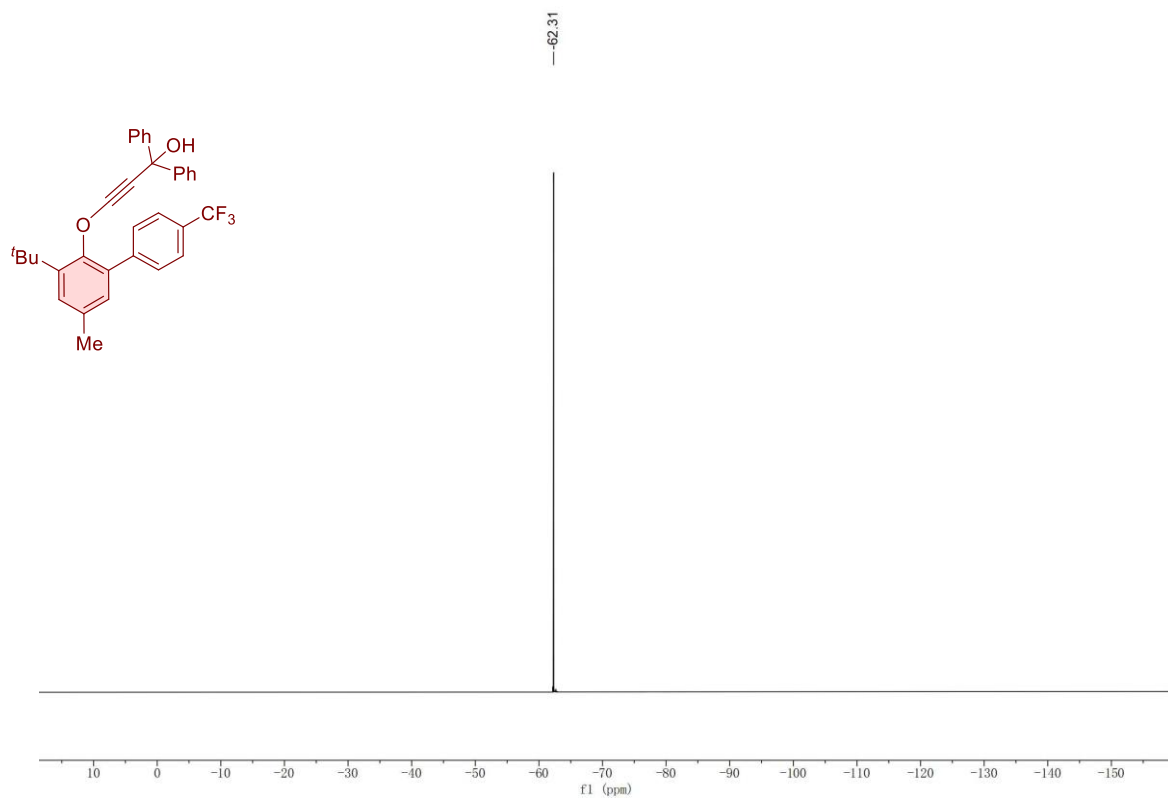

$^{19}\text{F}$  NMR spectrum of 1g (565 MHz,  $\text{CDCl}_3$ )

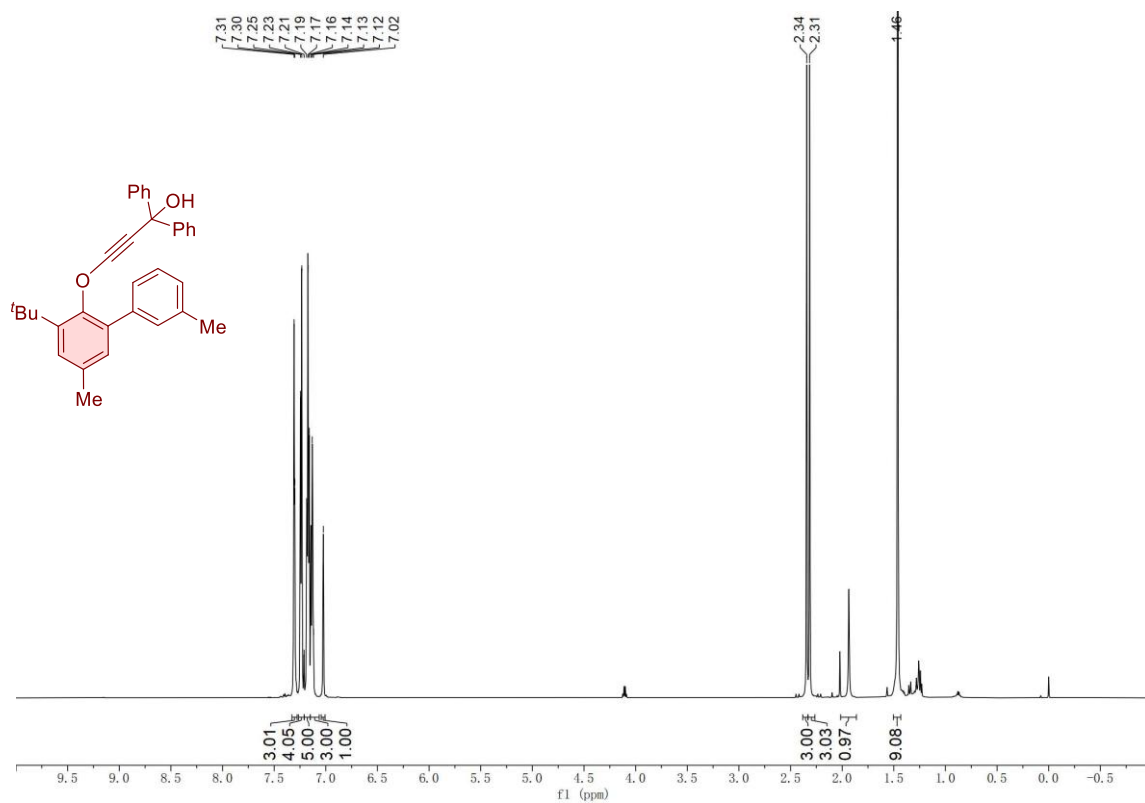

**<sup>1</sup>H NMR spectrum of 1h (600 MHz, CDCl<sub>3</sub>)**

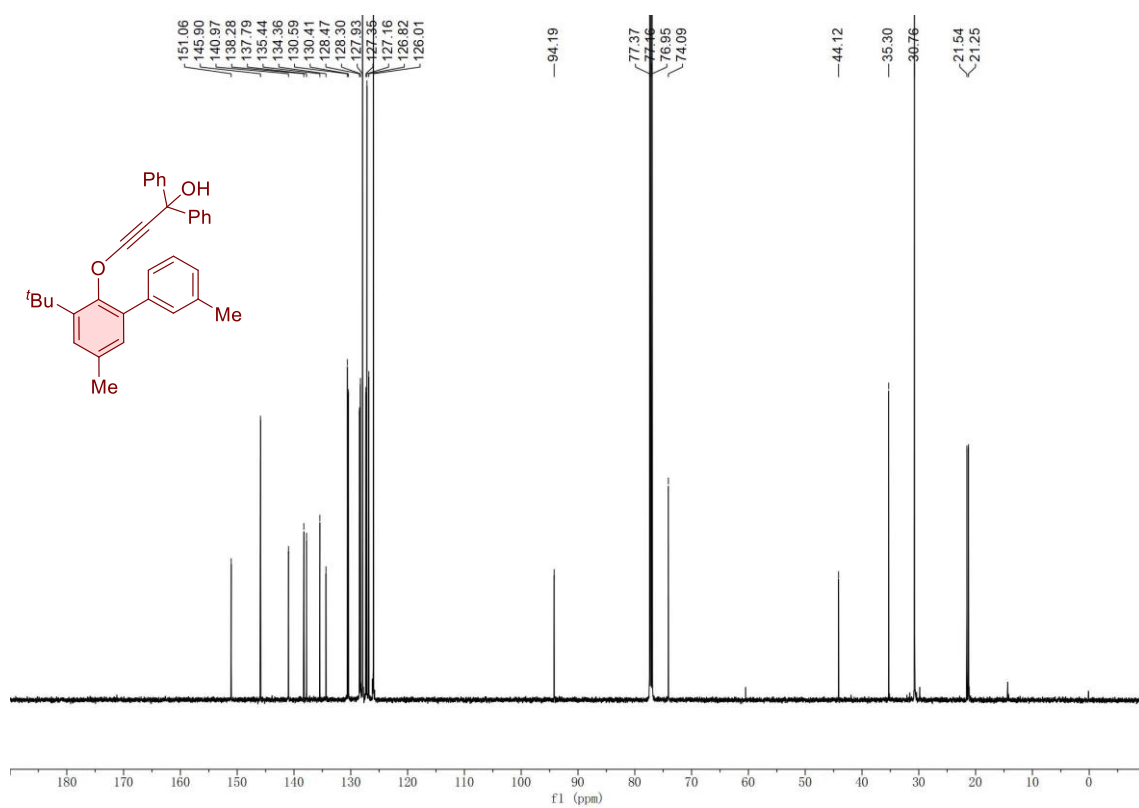

**<sup>13</sup>C NMR spectrum of 1h (151 MHz, CDCl<sub>3</sub>)**

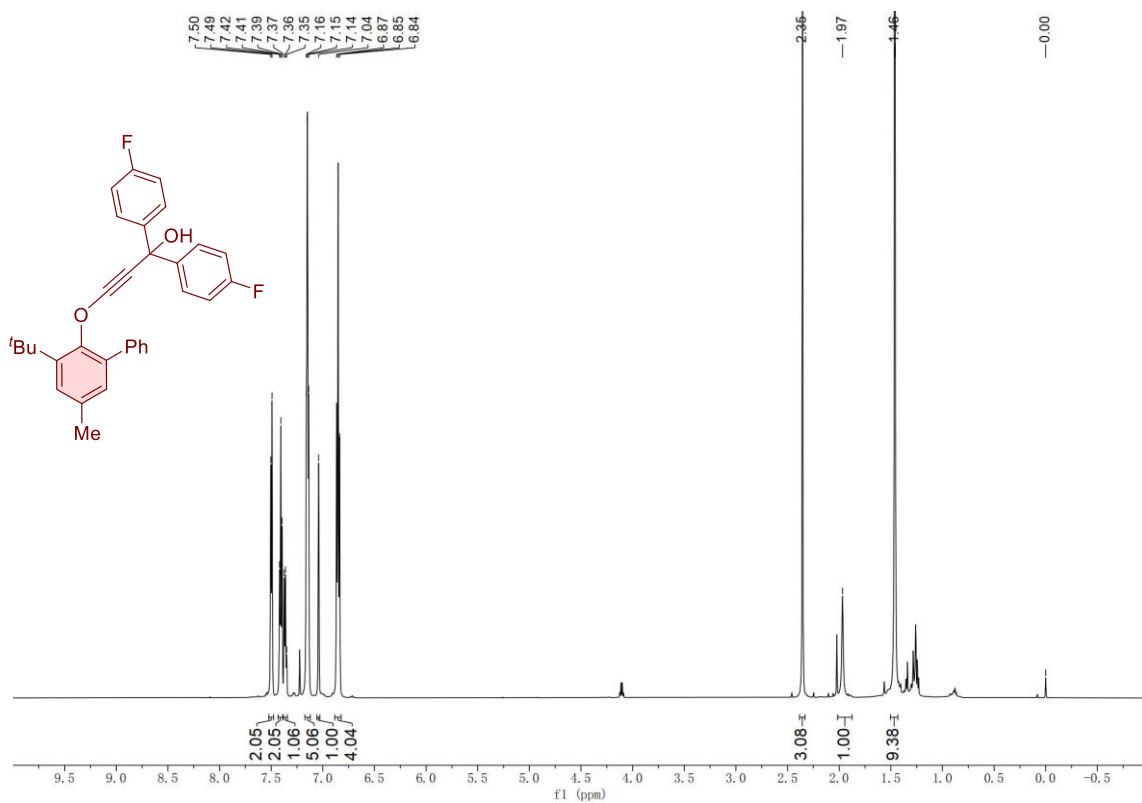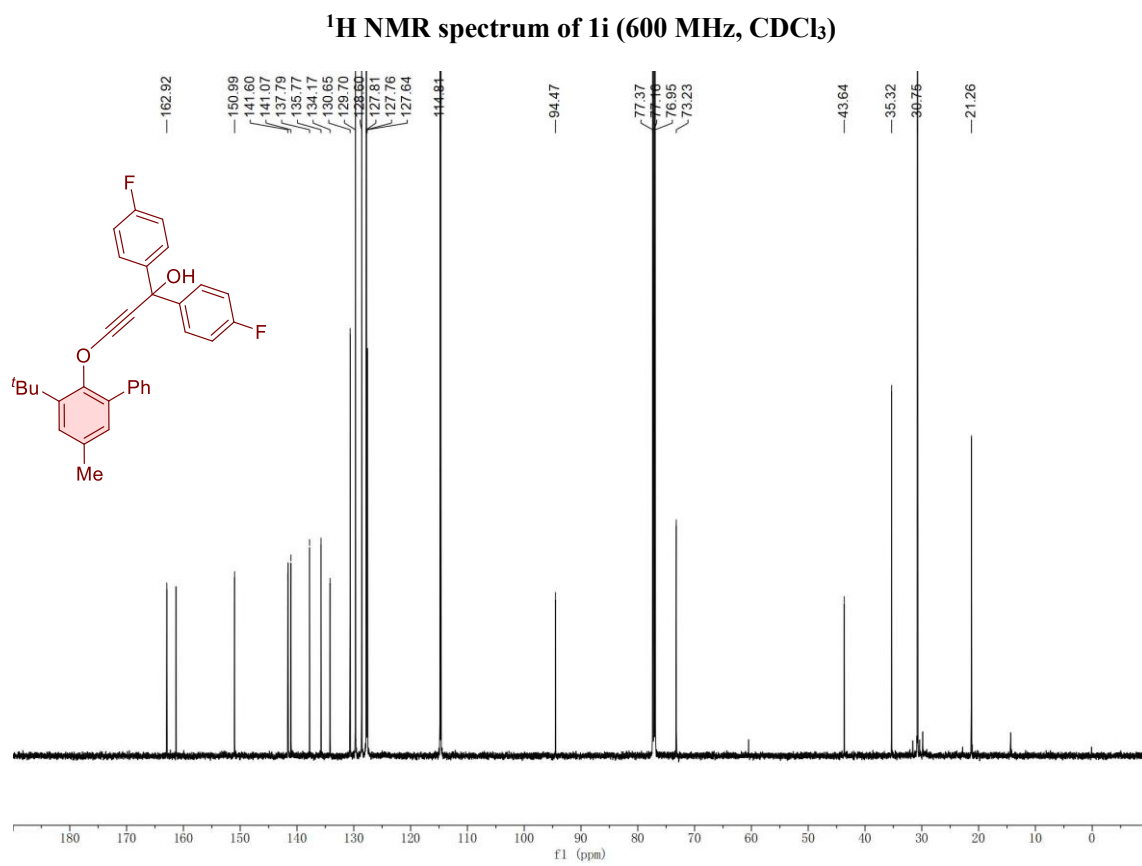

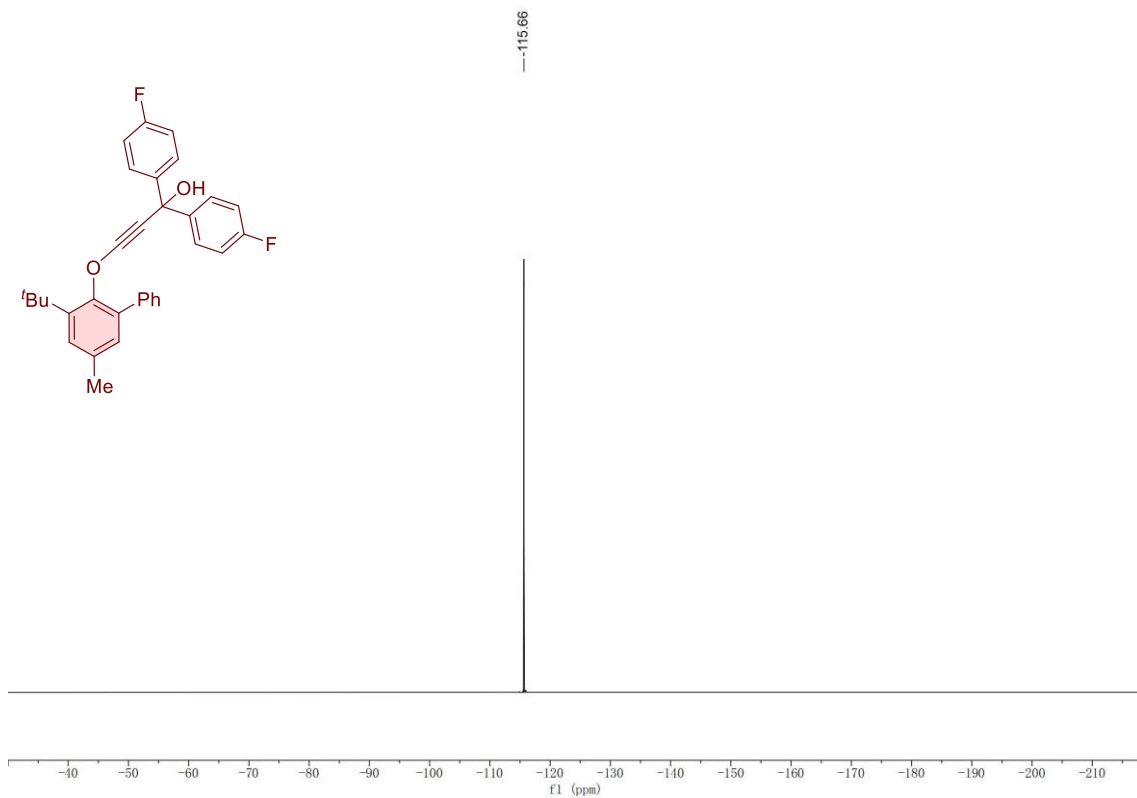

**$^{19}\text{F}$  NMR spectrum of **1i** (565 MHz,  $\text{CDCl}_3$ )**

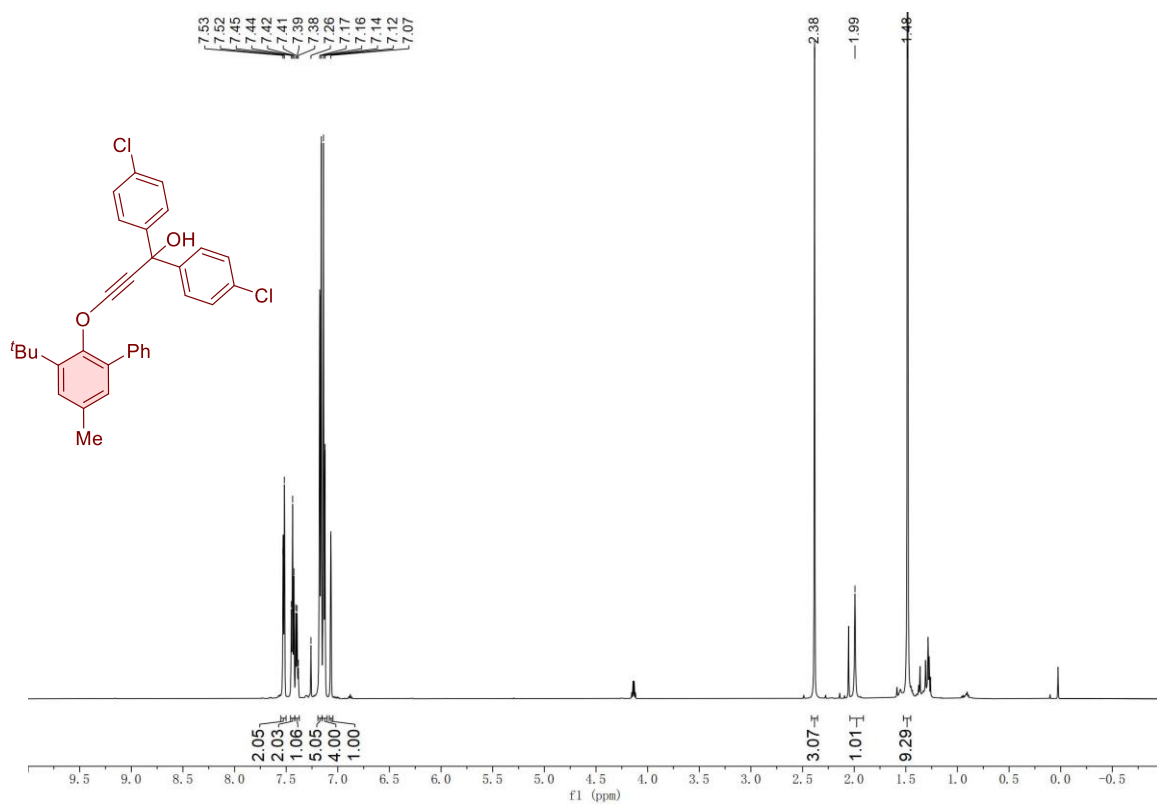

**<sup>1</sup>H NMR spectrum of 1j (600 MHz, CDCl<sub>3</sub>)**

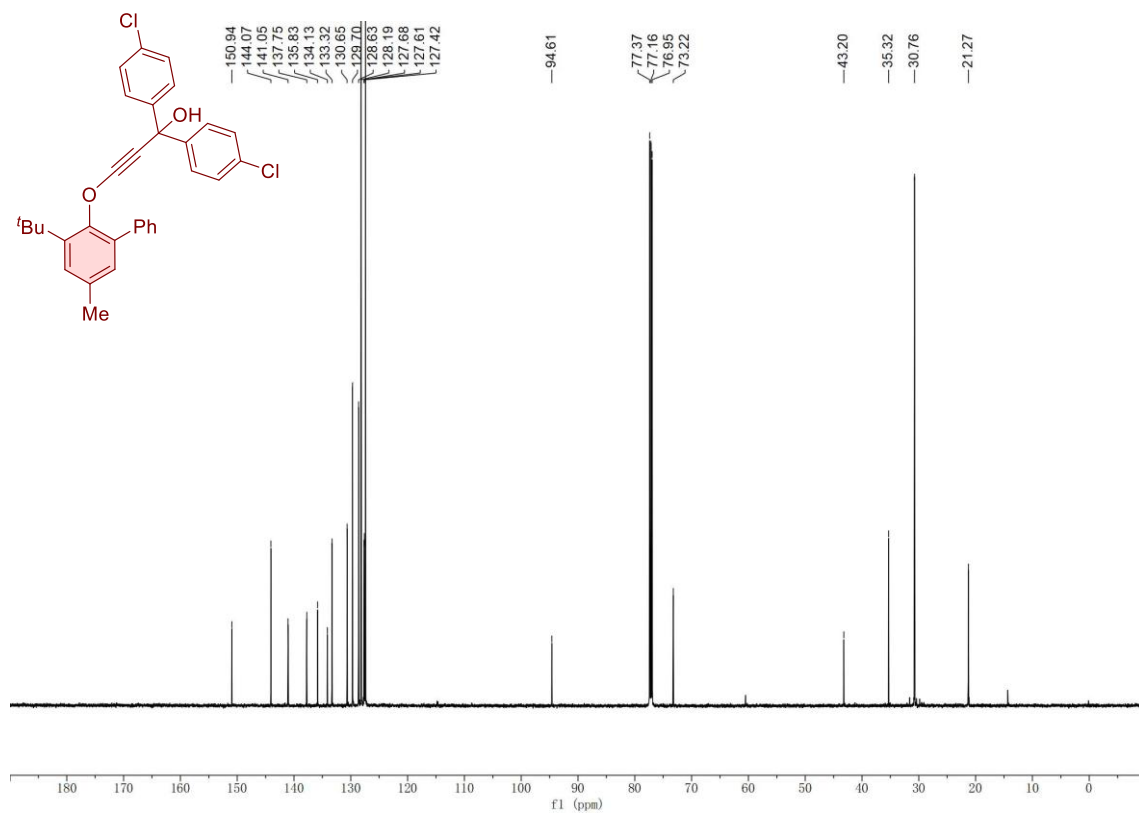

**<sup>13</sup>C NMR spectrum of 1j (151 MHz, CDCl<sub>3</sub>)**

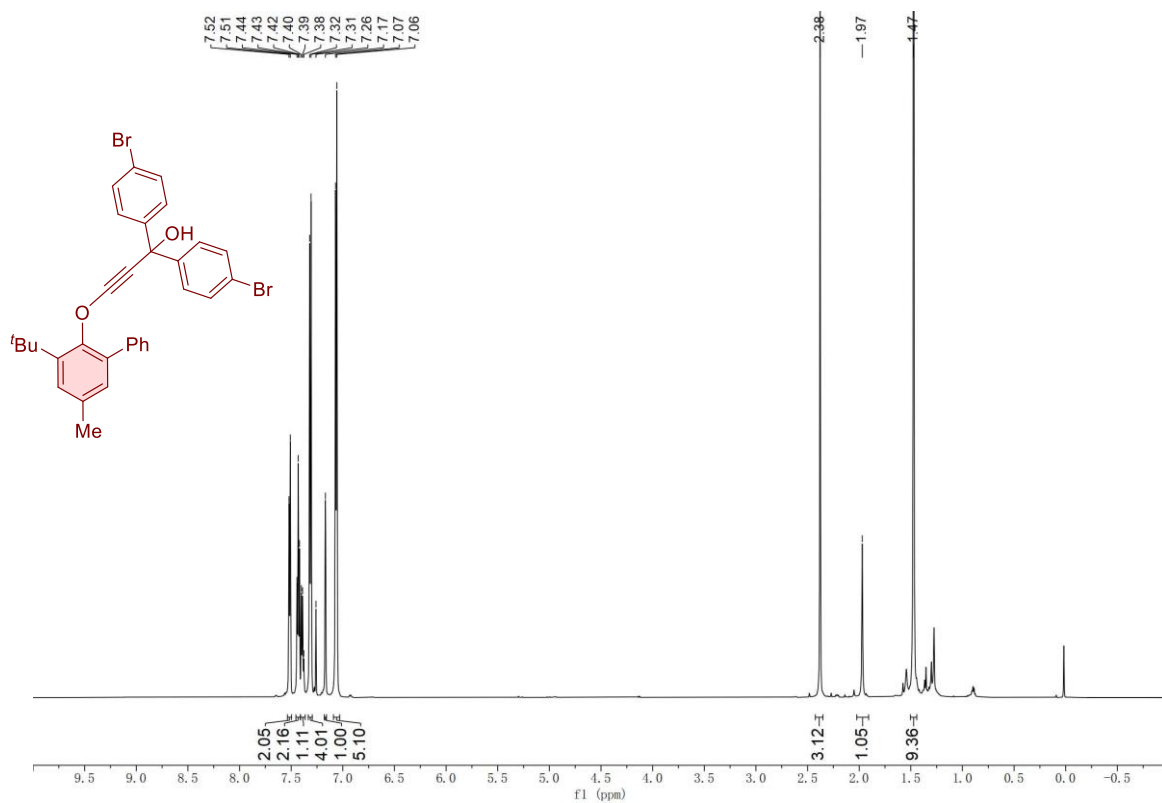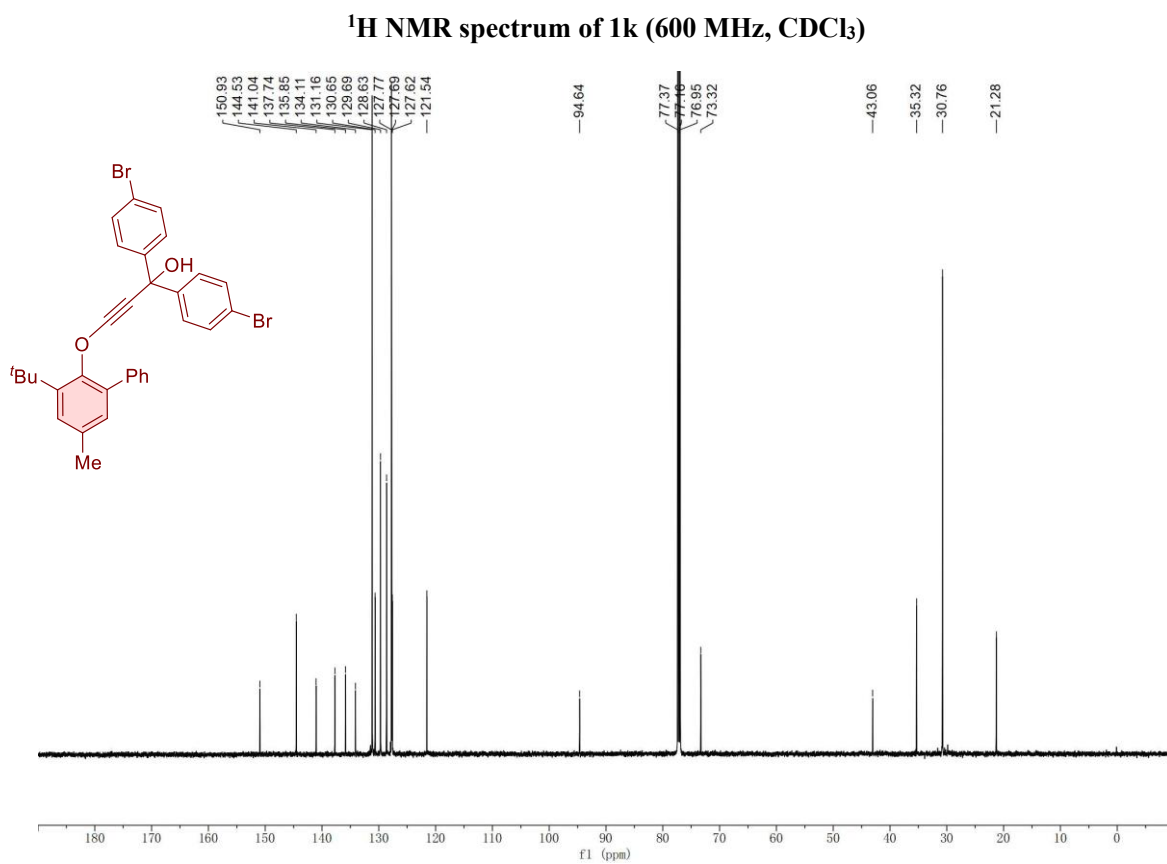

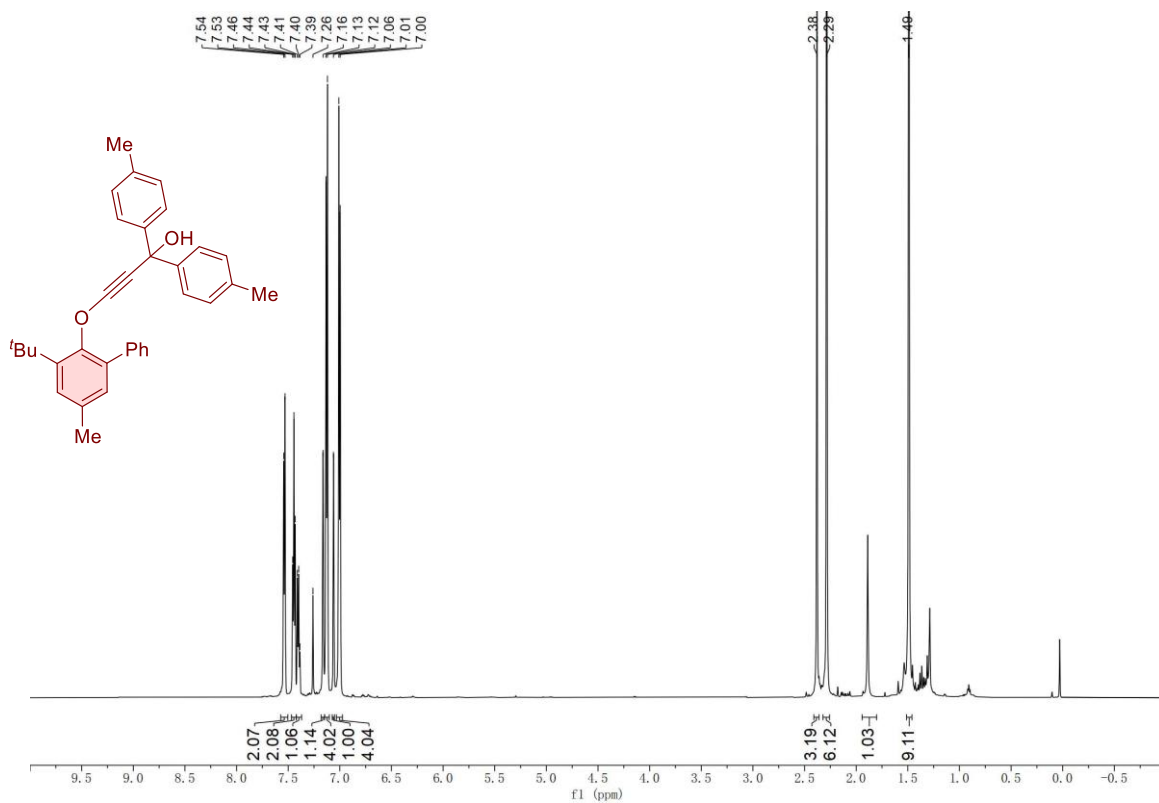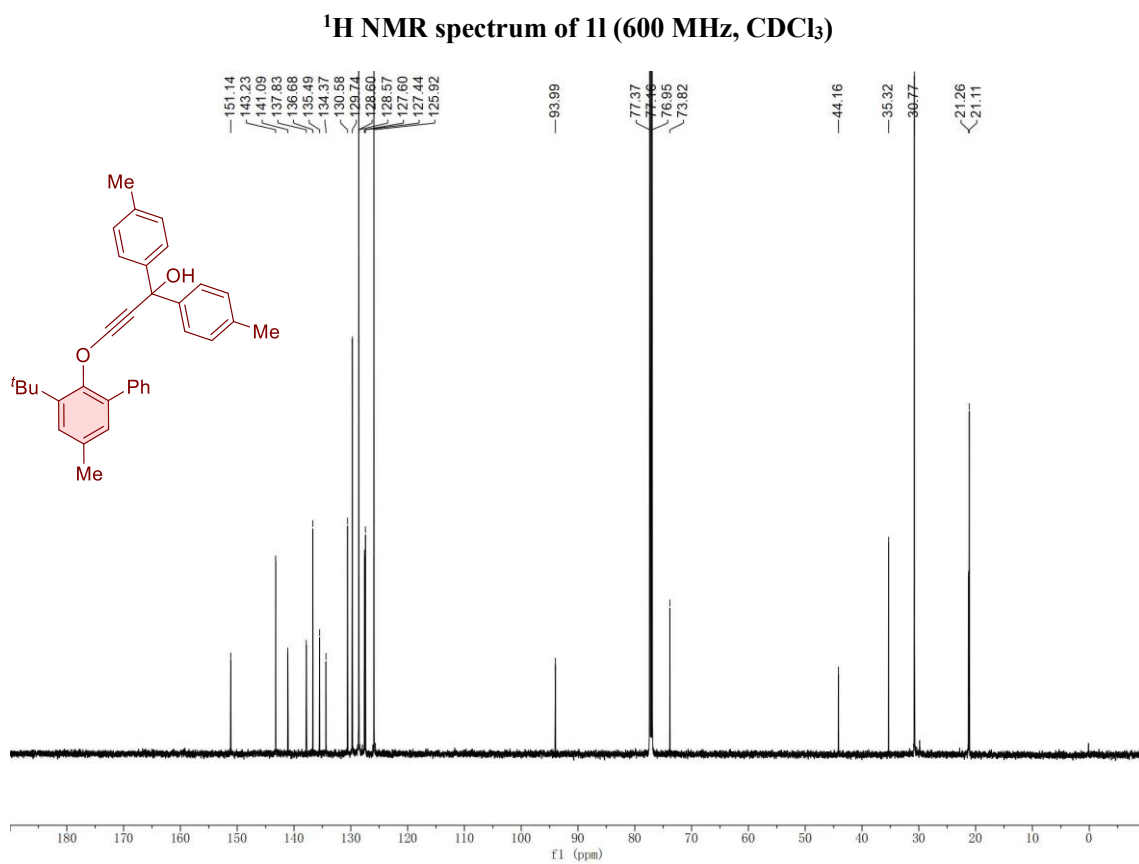

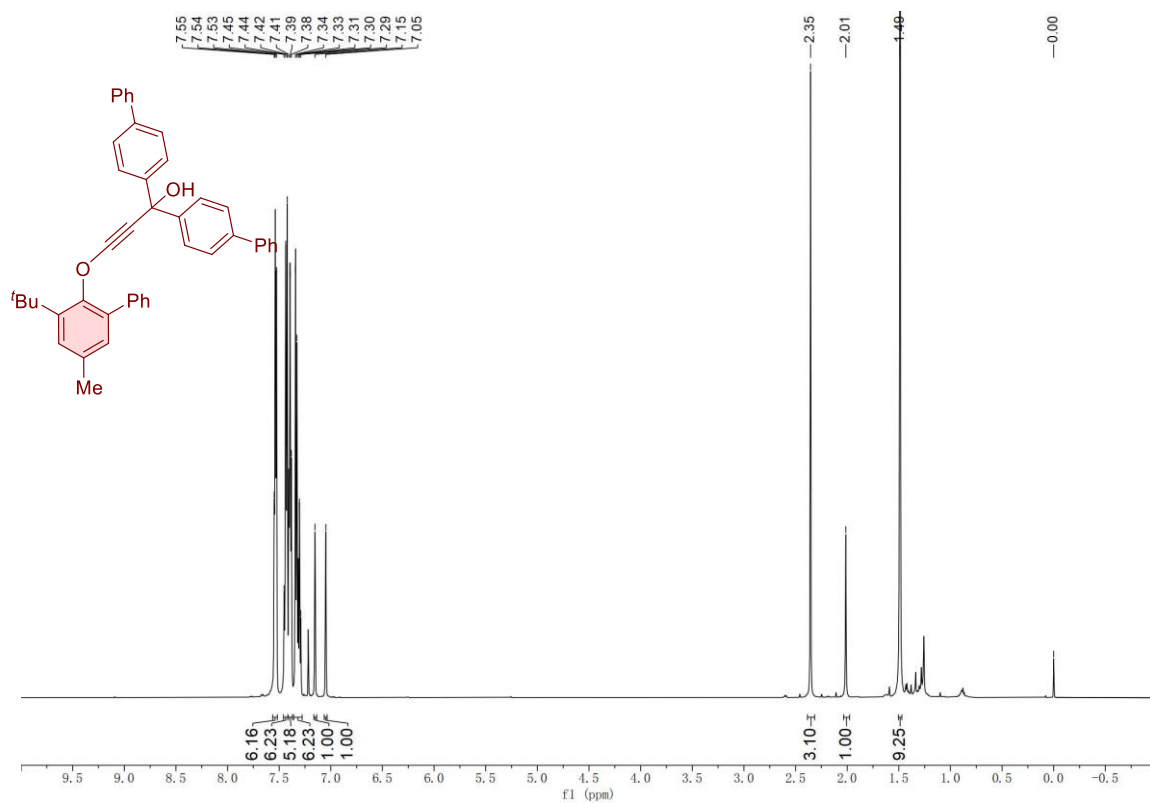

**<sup>1</sup>H NMR spectrum of 1m (600 MHz, CDCl<sub>3</sub>)**

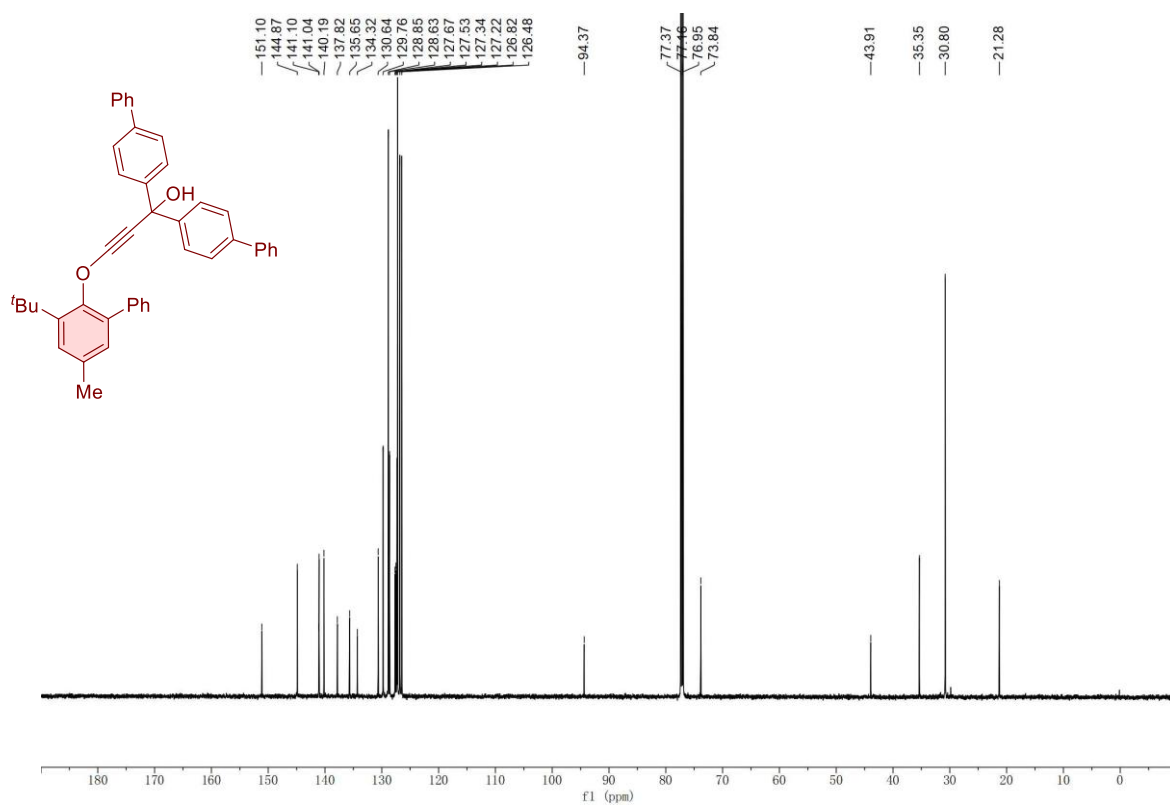

**<sup>13</sup>C NMR spectrum of 1m (151 MHz, CDCl<sub>3</sub>)**

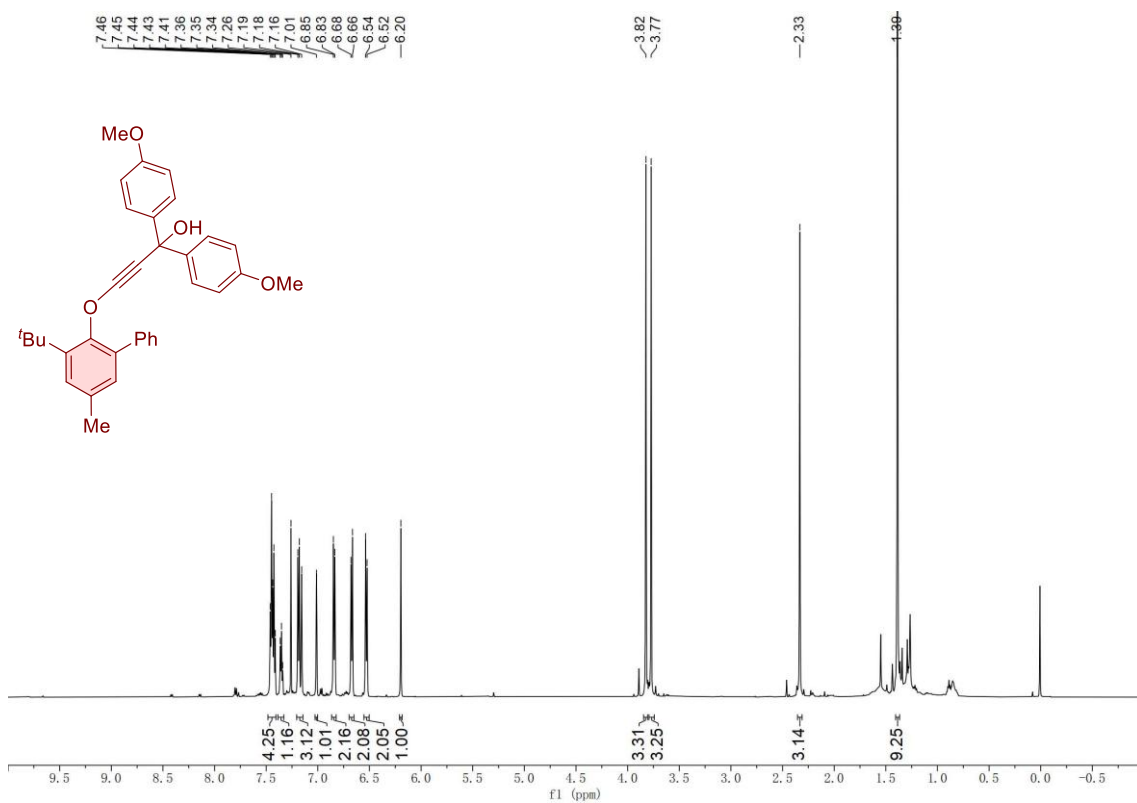

<sup>1</sup>H NMR spectrum of 1n (600 MHz, CDCl<sub>3</sub>)

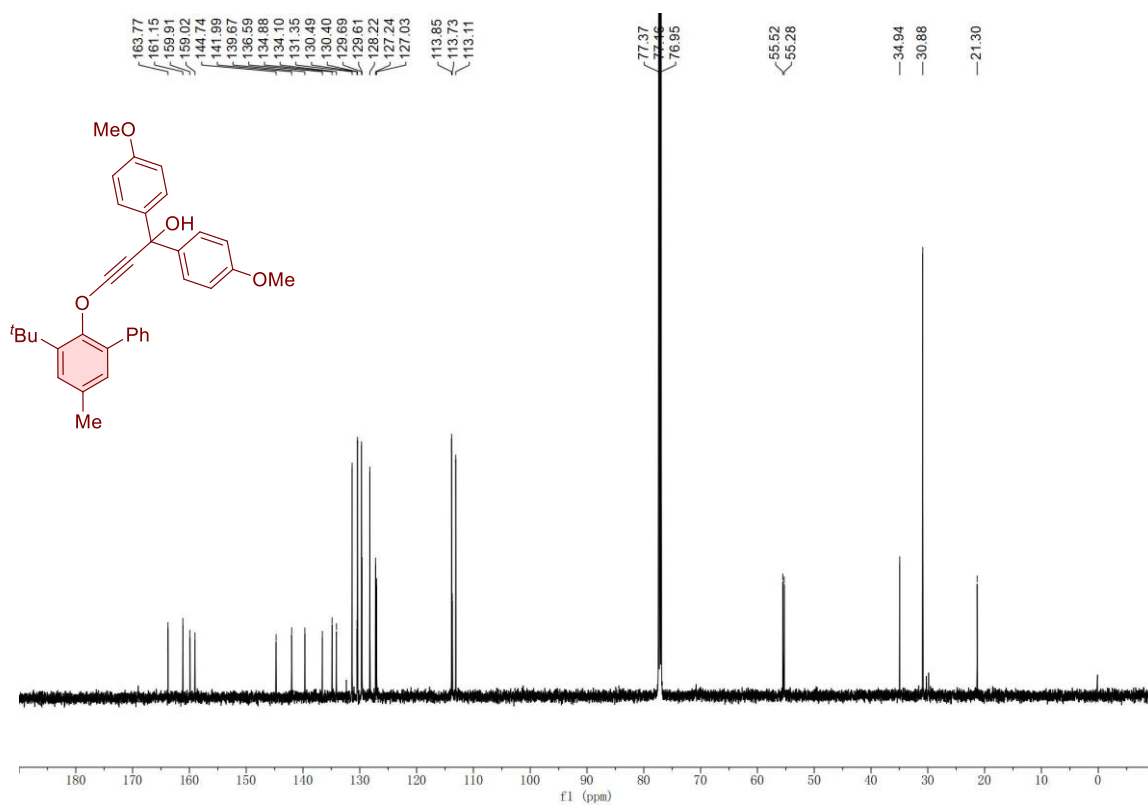

<sup>13</sup>C NMR spectrum of 1n (151 MHz, CDCl<sub>3</sub>)

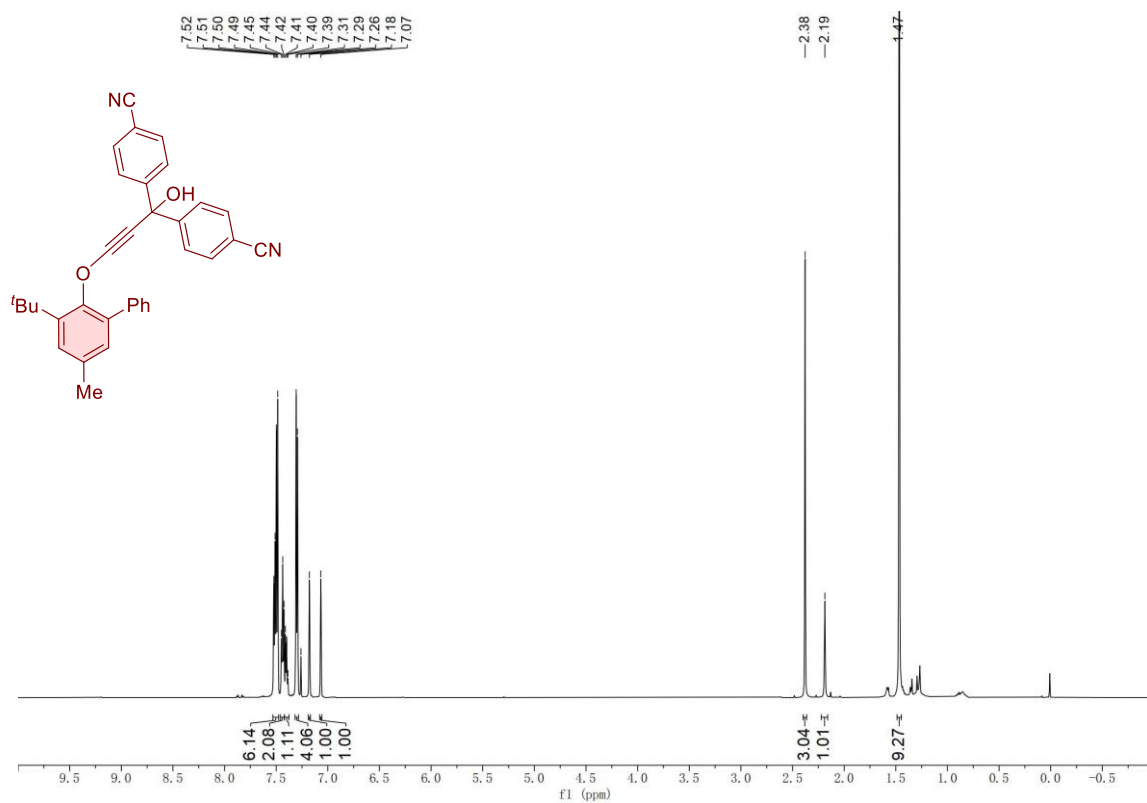

**<sup>1</sup>H NMR spectrum of 1o (600 MHz, CDCl<sub>3</sub>)**

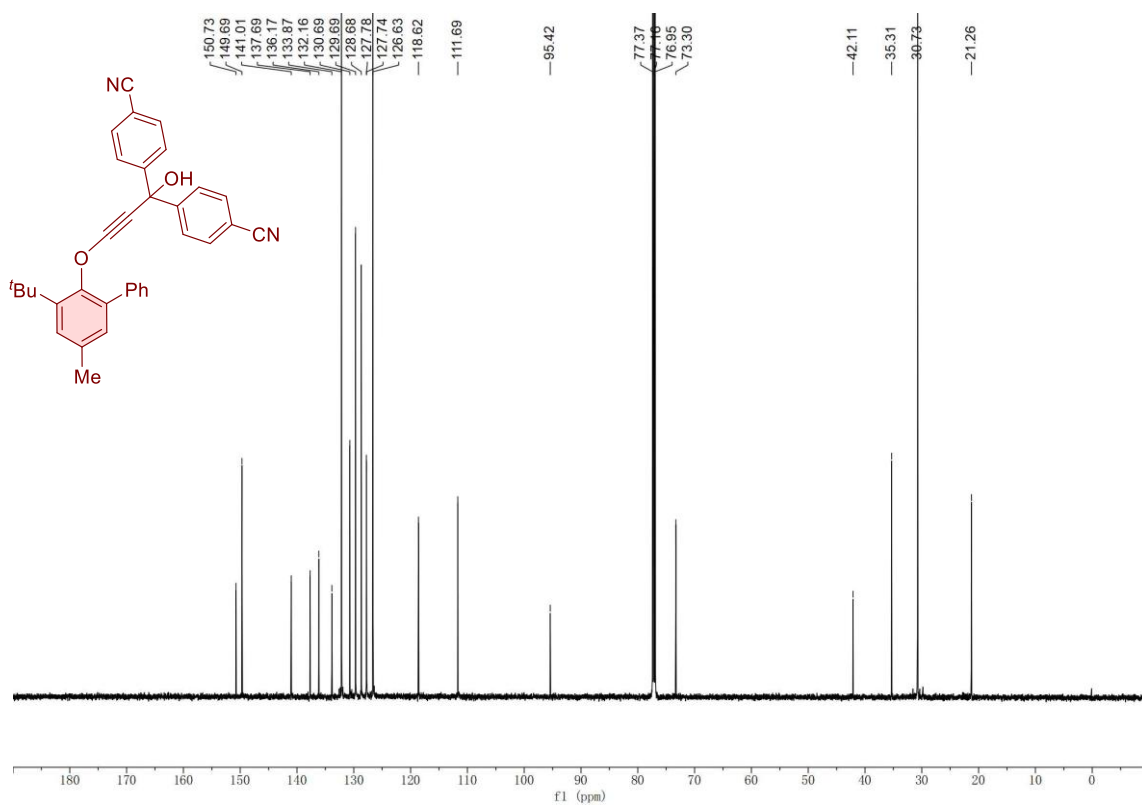

**<sup>13</sup>C NMR spectrum of 1o (151 MHz, CDCl<sub>3</sub>)**

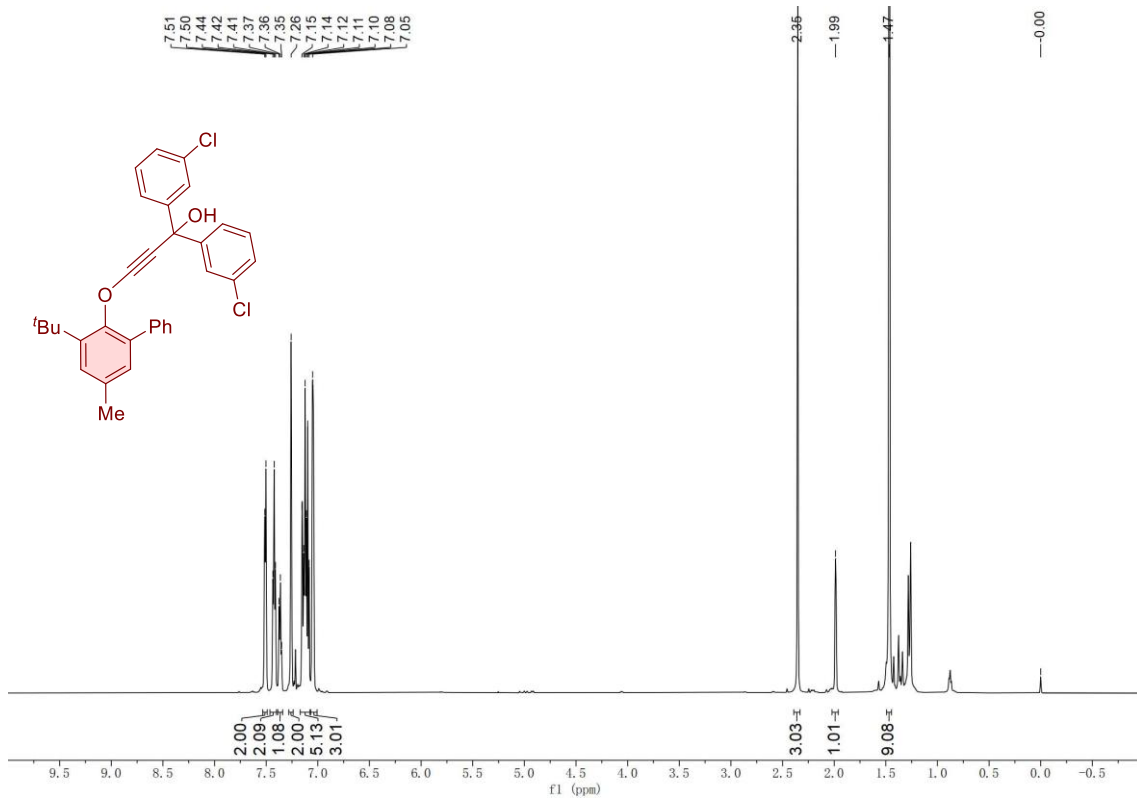

**<sup>1</sup>H NMR spectrum of 1p (600 MHz, CDCl<sub>3</sub>)**

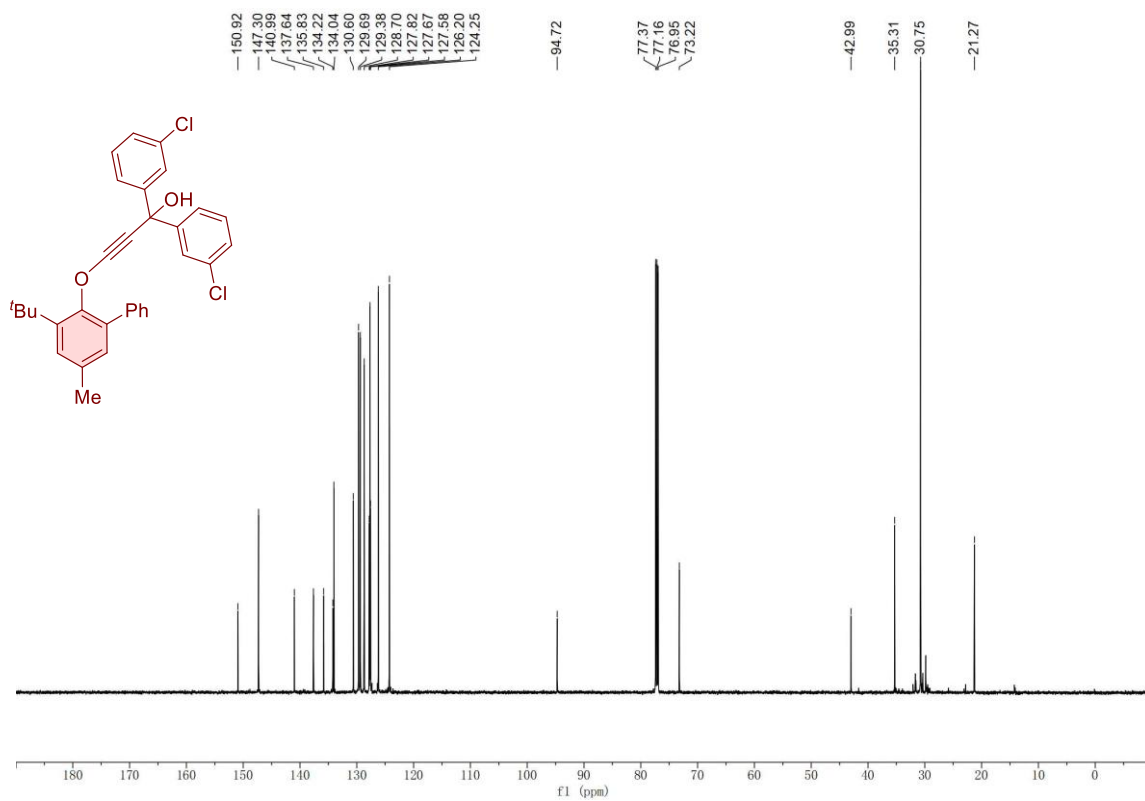

**<sup>13</sup>C NMR spectrum of 1p (151 MHz, CDCl<sub>3</sub>)**

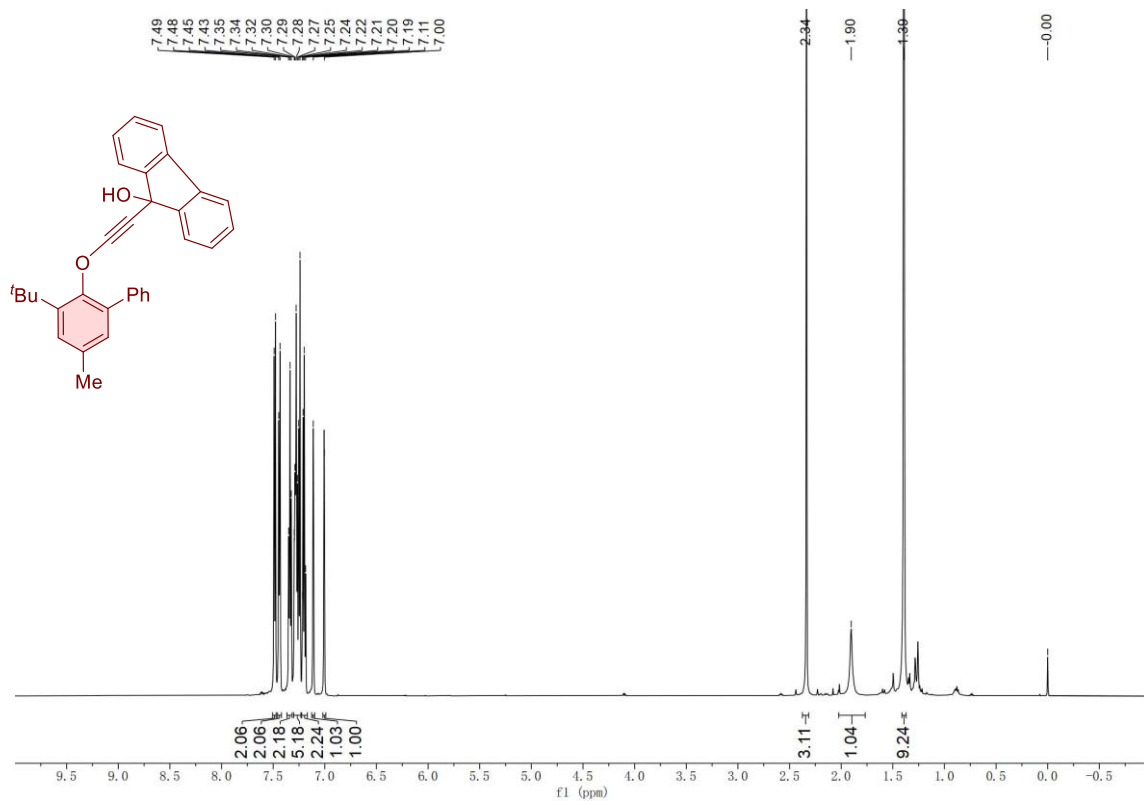

**<sup>1</sup>H NMR spectrum of 1q (600 MHz, CDCl<sub>3</sub>)**

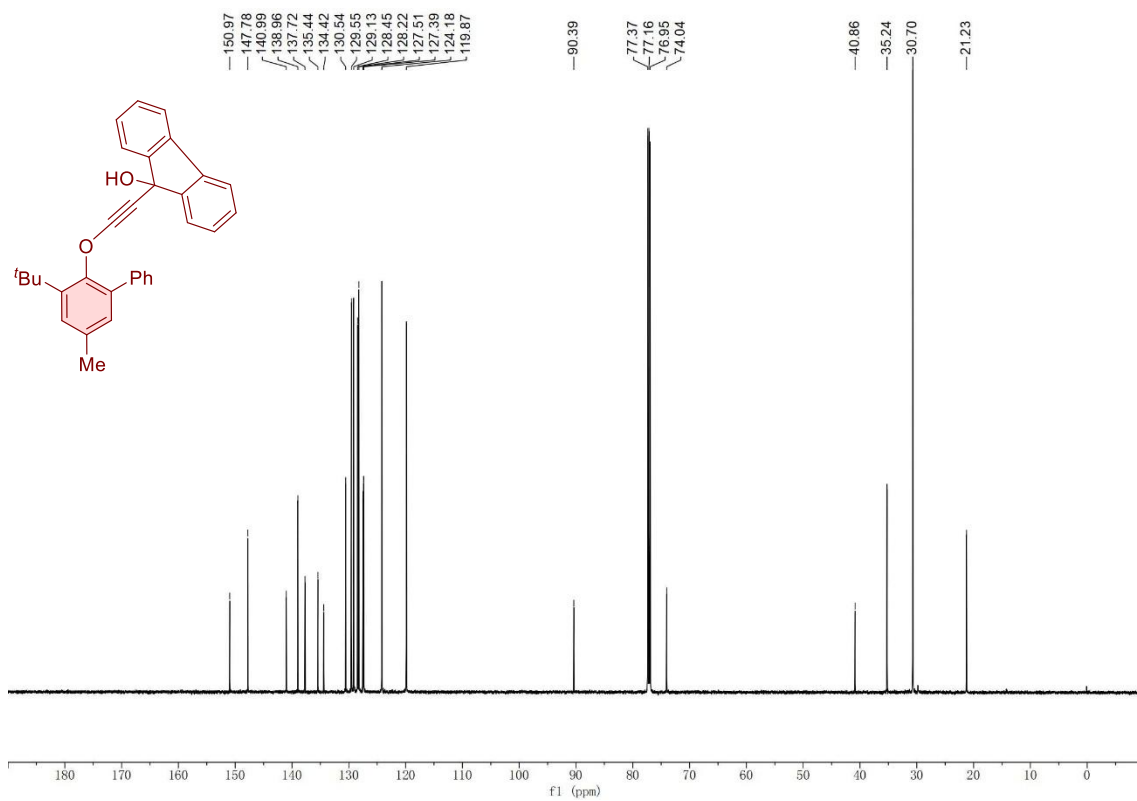

**<sup>13</sup>C NMR spectrum of 1q (151 MHz, CDCl<sub>3</sub>)**

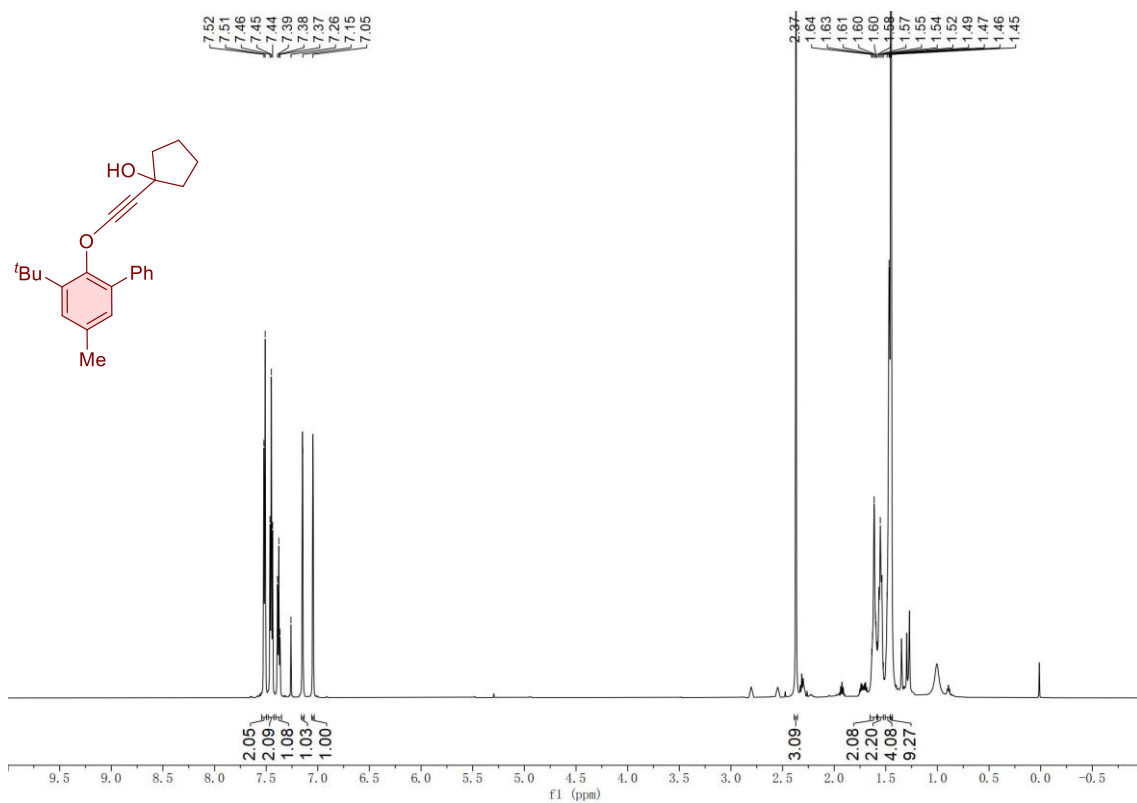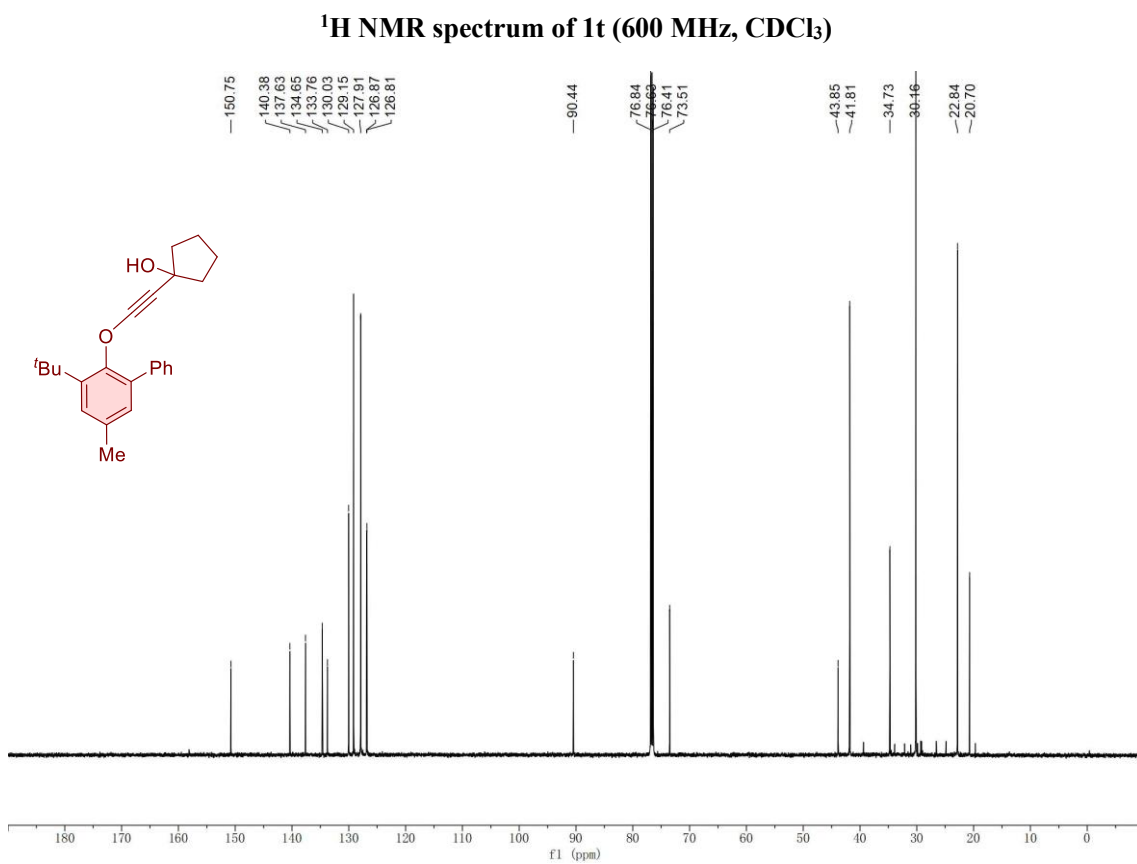

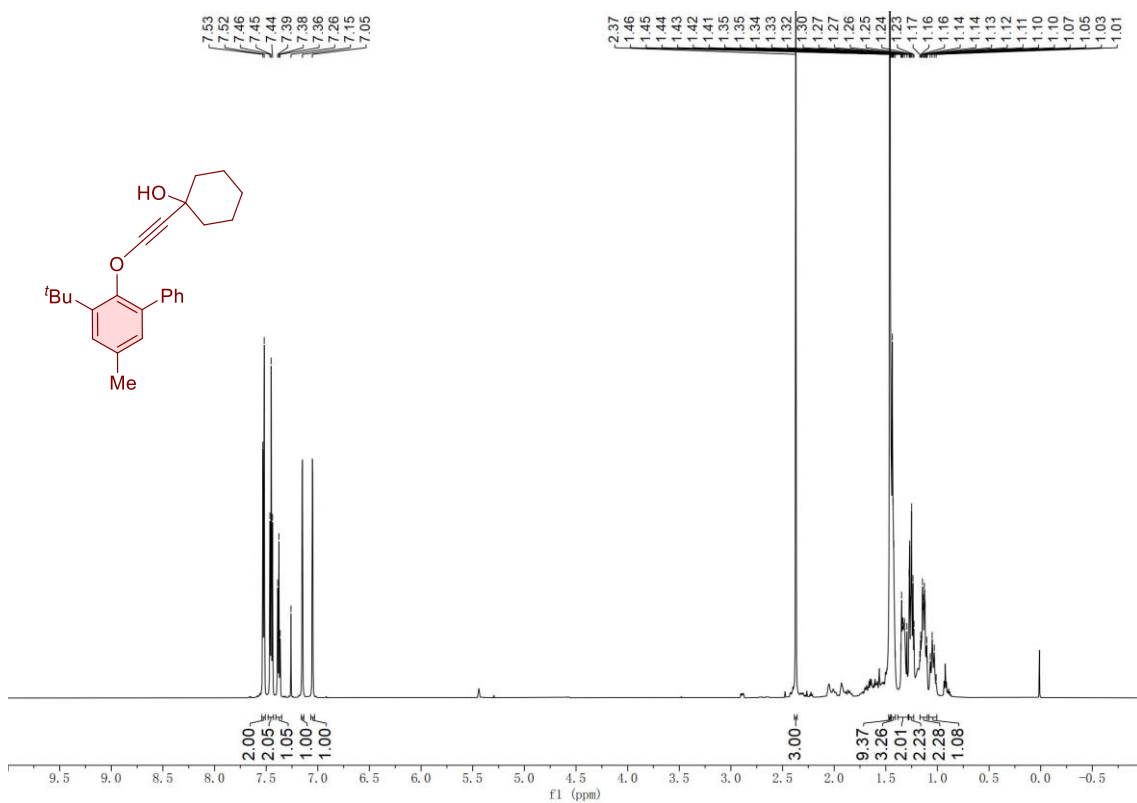

**<sup>1</sup>H NMR spectrum of 1u (600 MHz, CDCl<sub>3</sub>)**

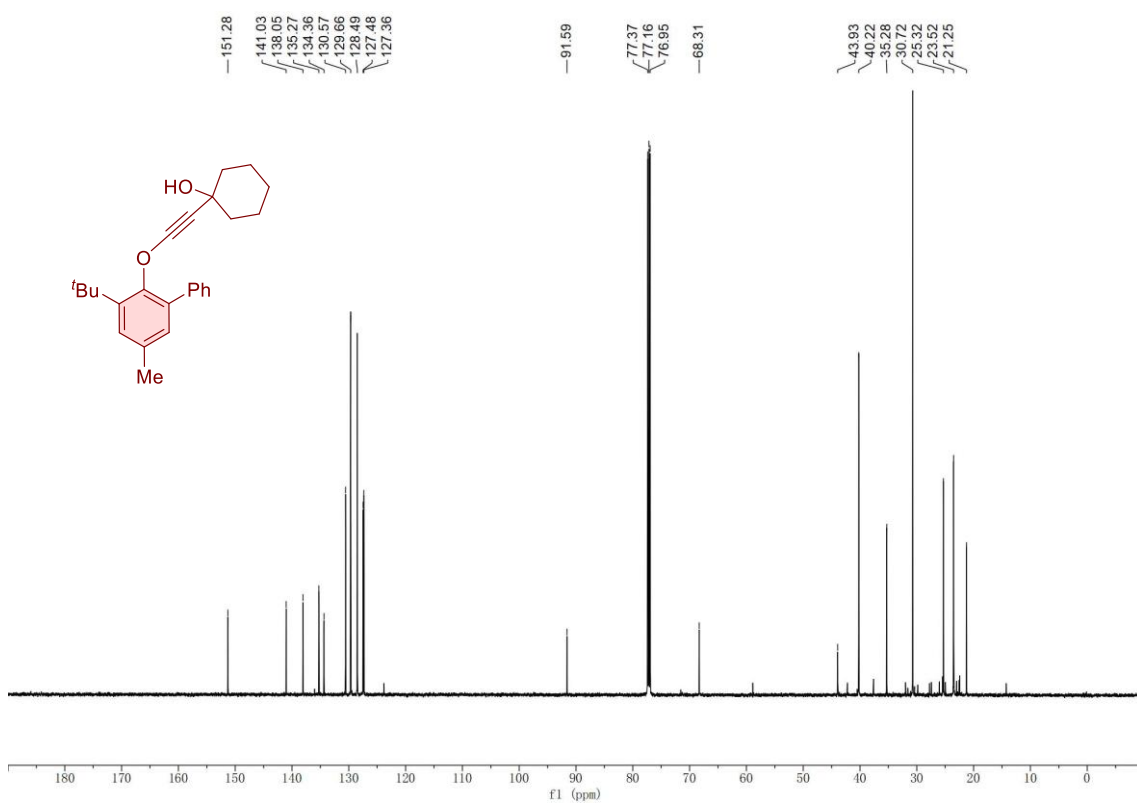

**<sup>13</sup>C NMR spectrum of 1u (151 MHz, CDCl<sub>3</sub>)**

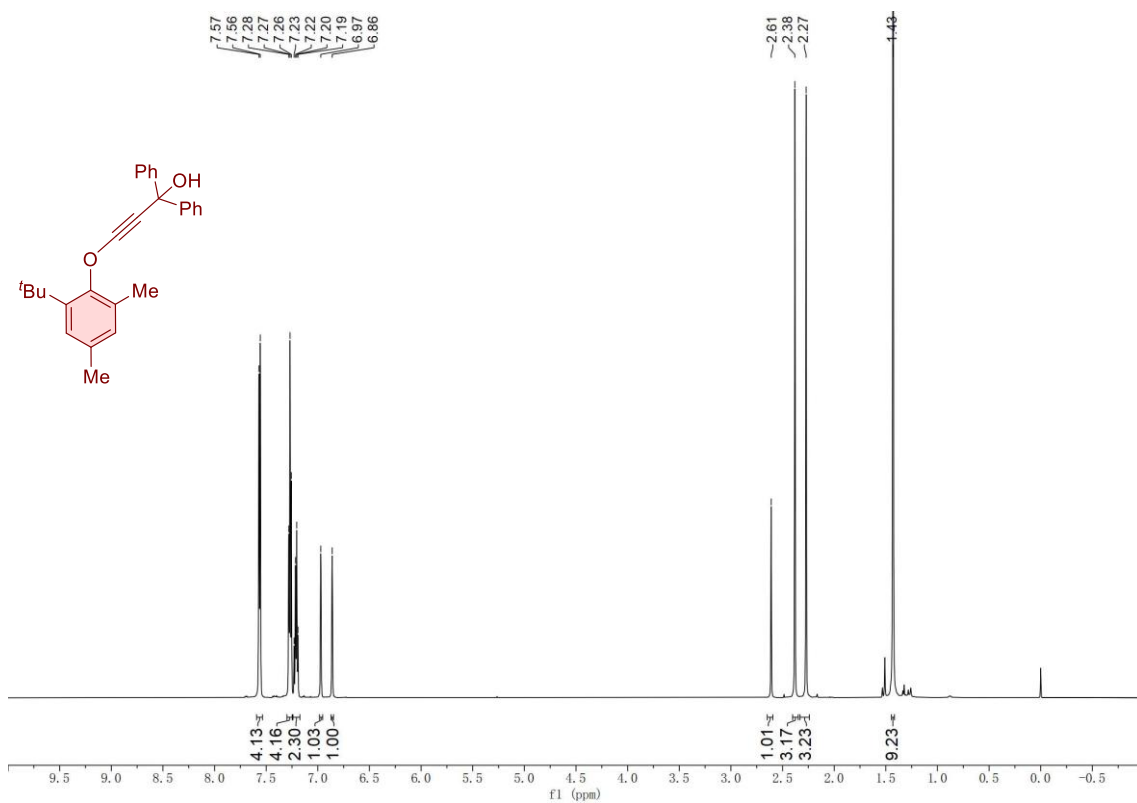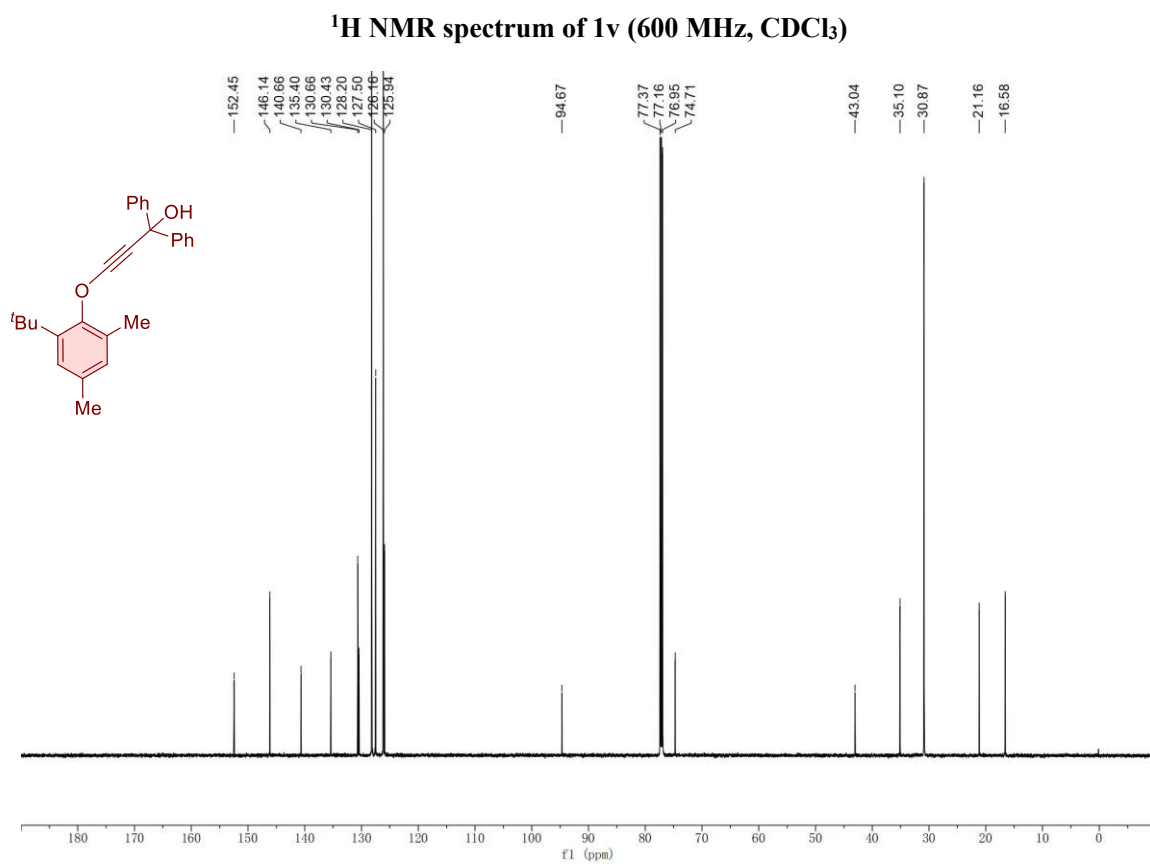

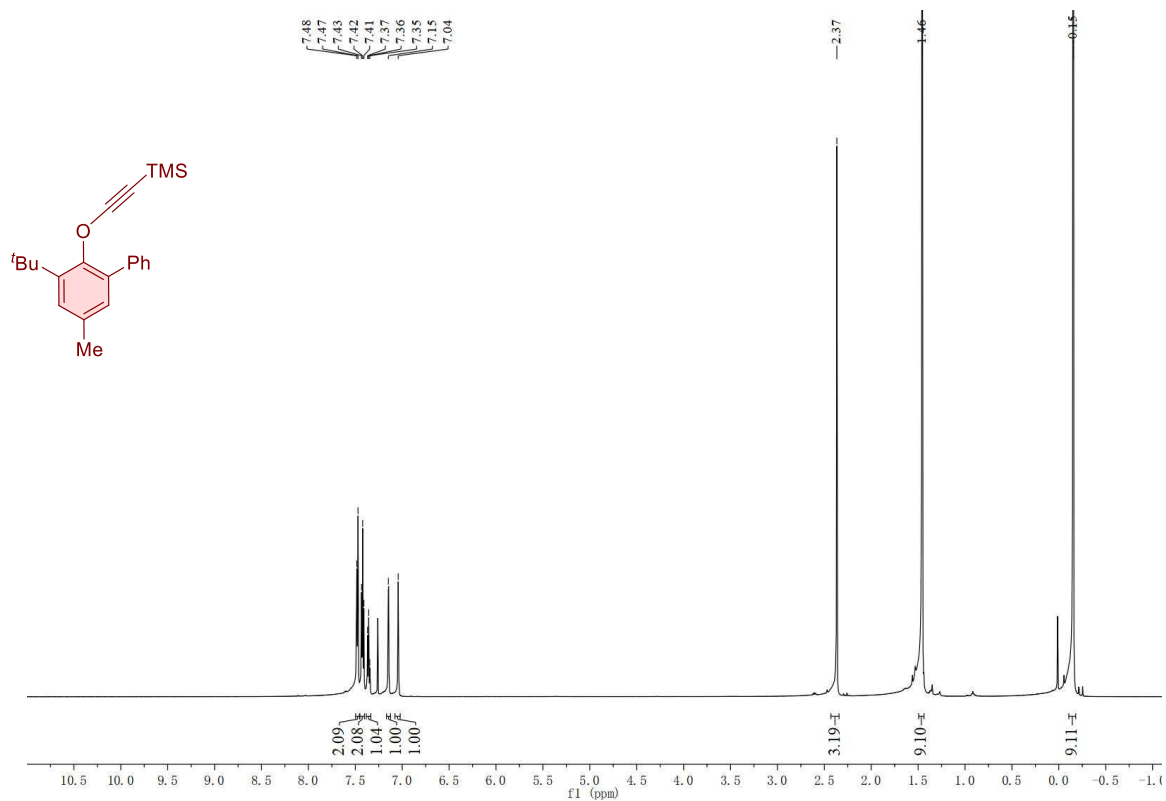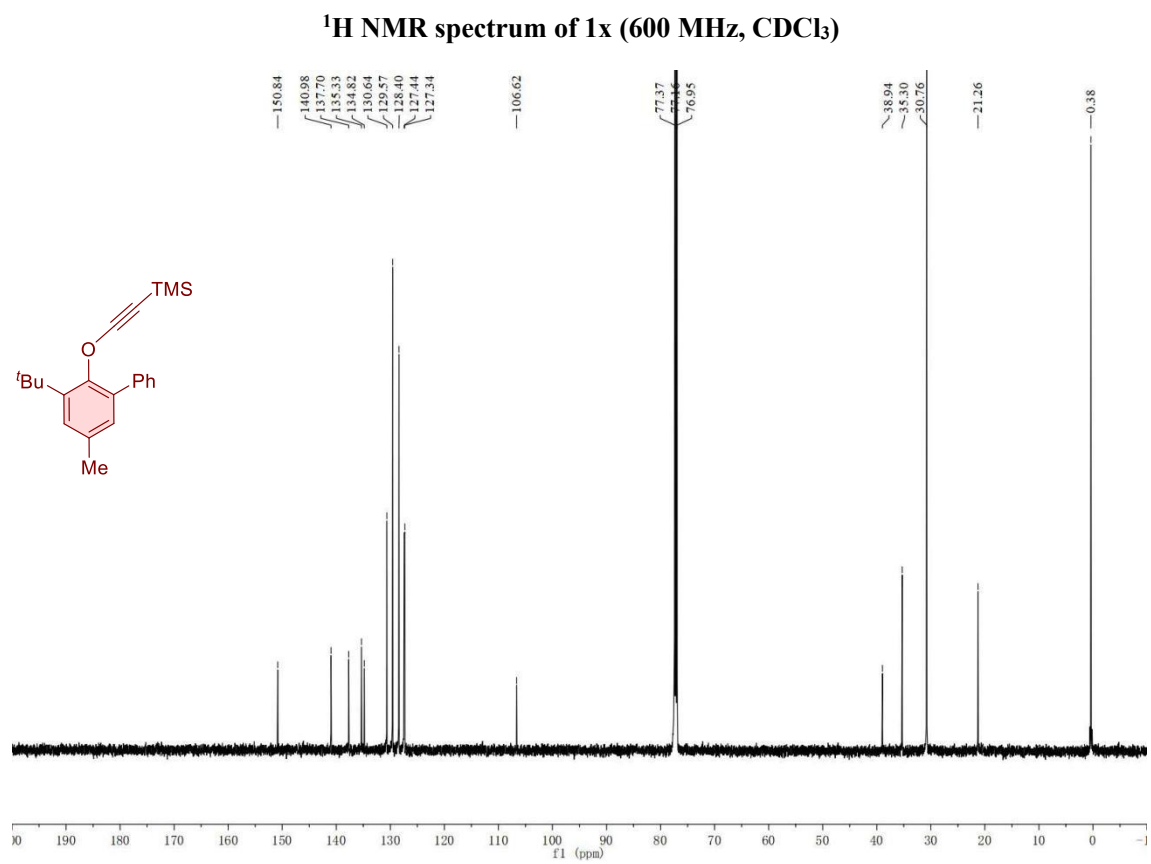

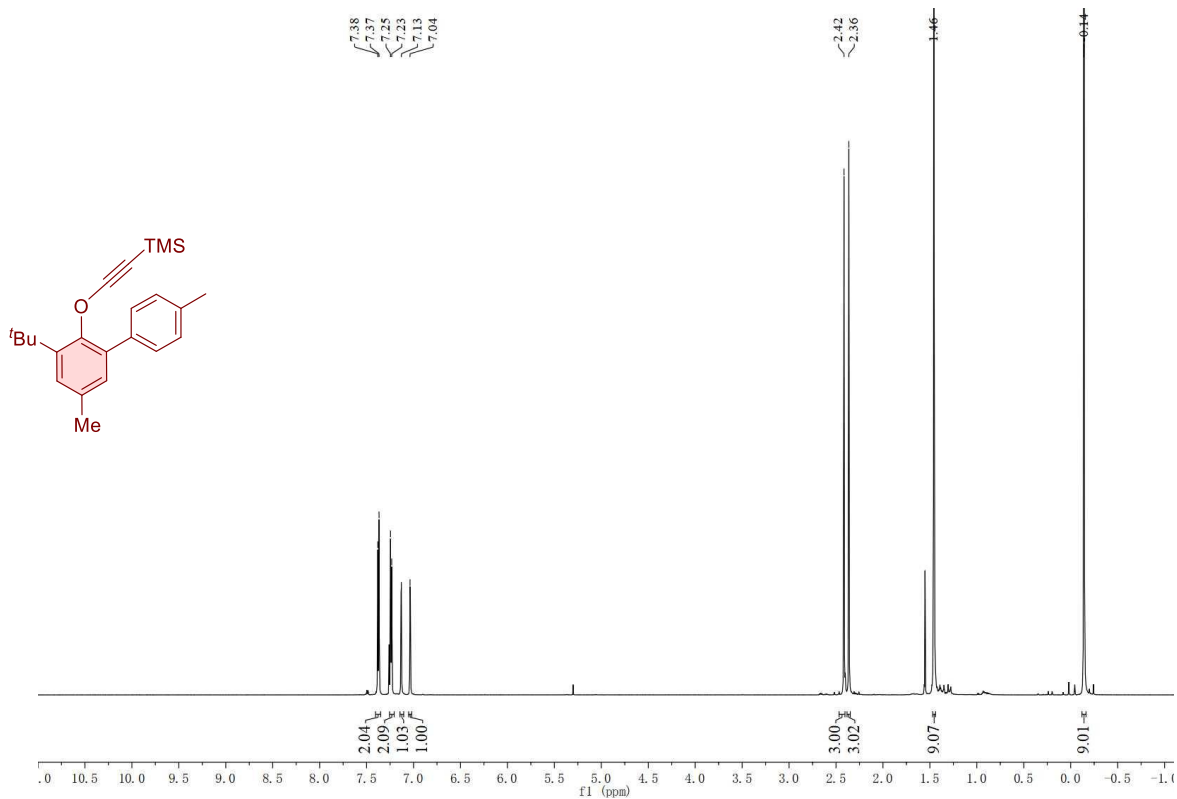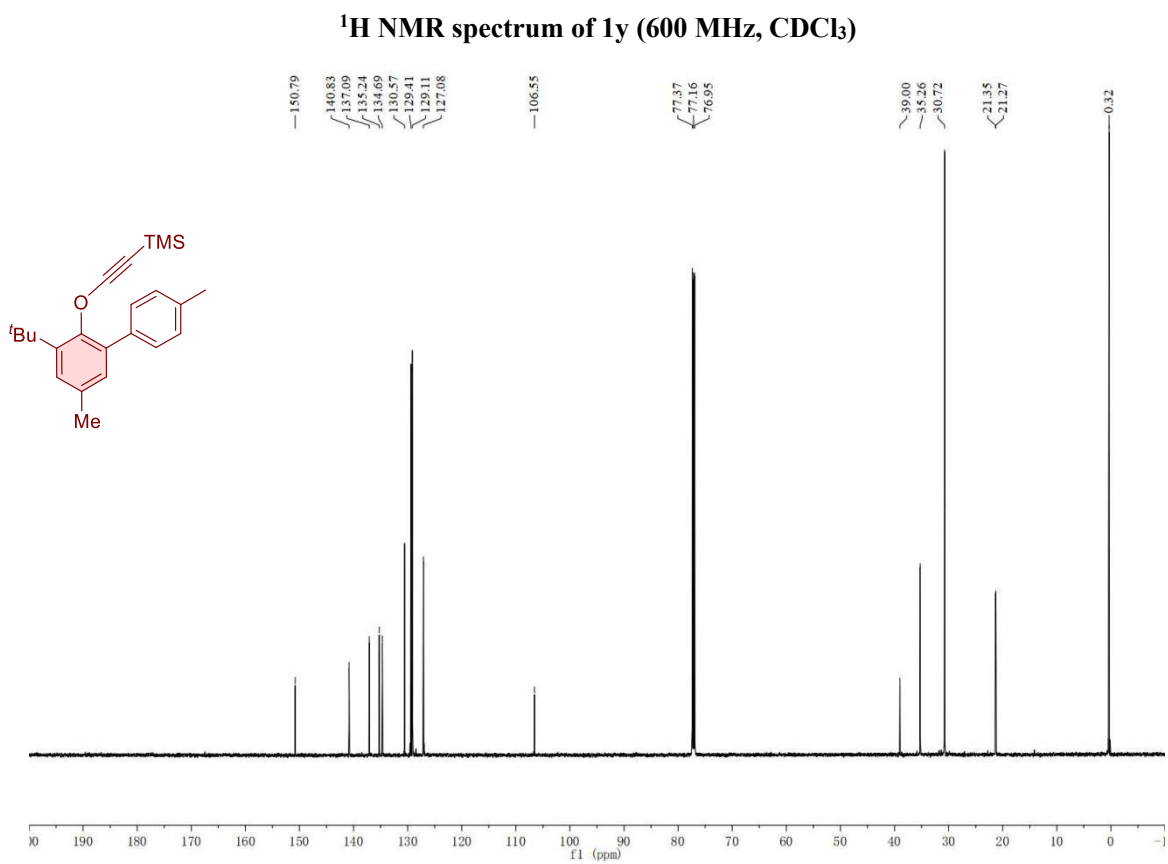

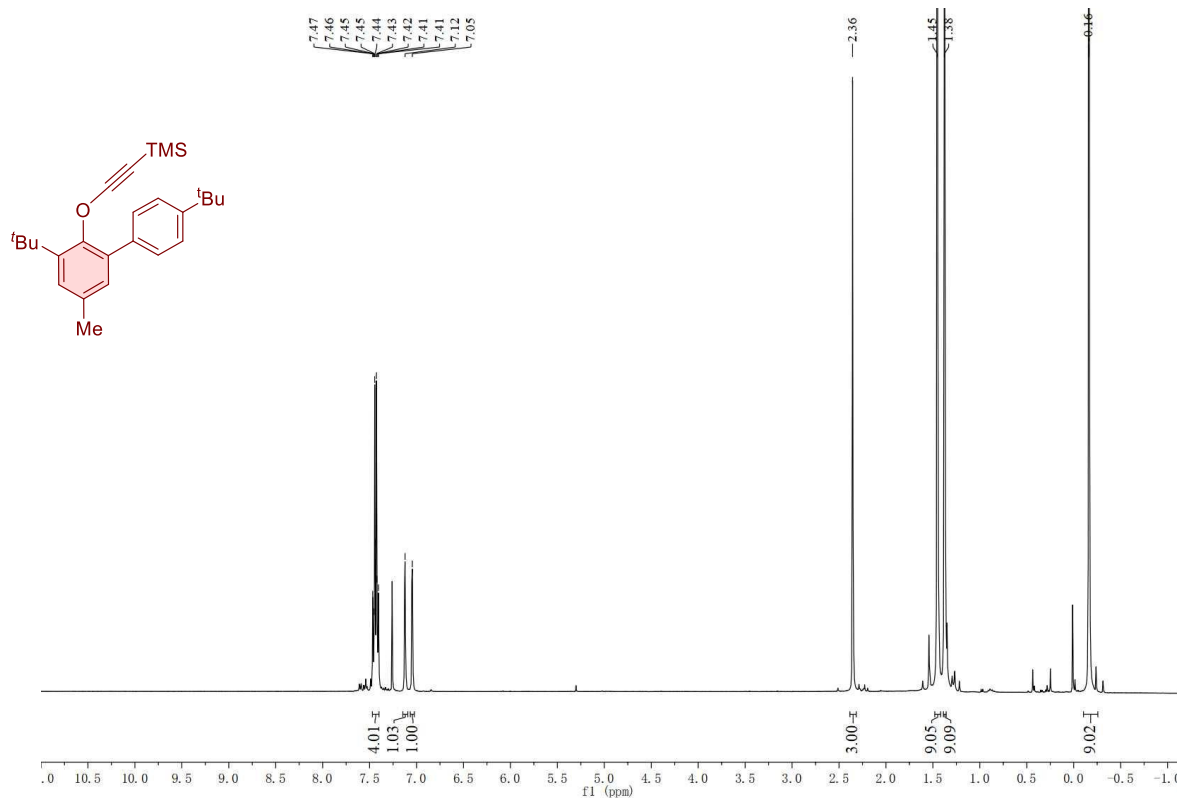

**<sup>1</sup>H NMR spectrum of 1z (600 MHz, CDCl<sub>3</sub>)**

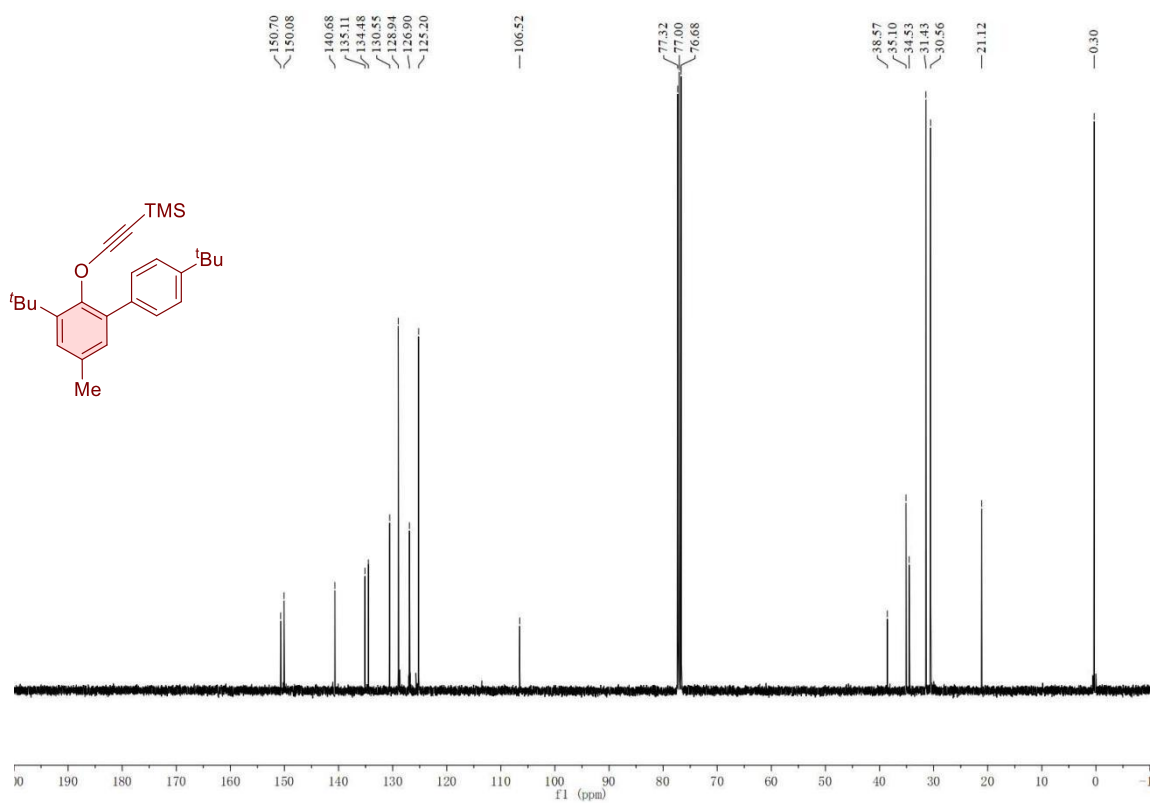

**<sup>13</sup>C NMR spectrum of 1z (151 MHz, CDCl<sub>3</sub>)**

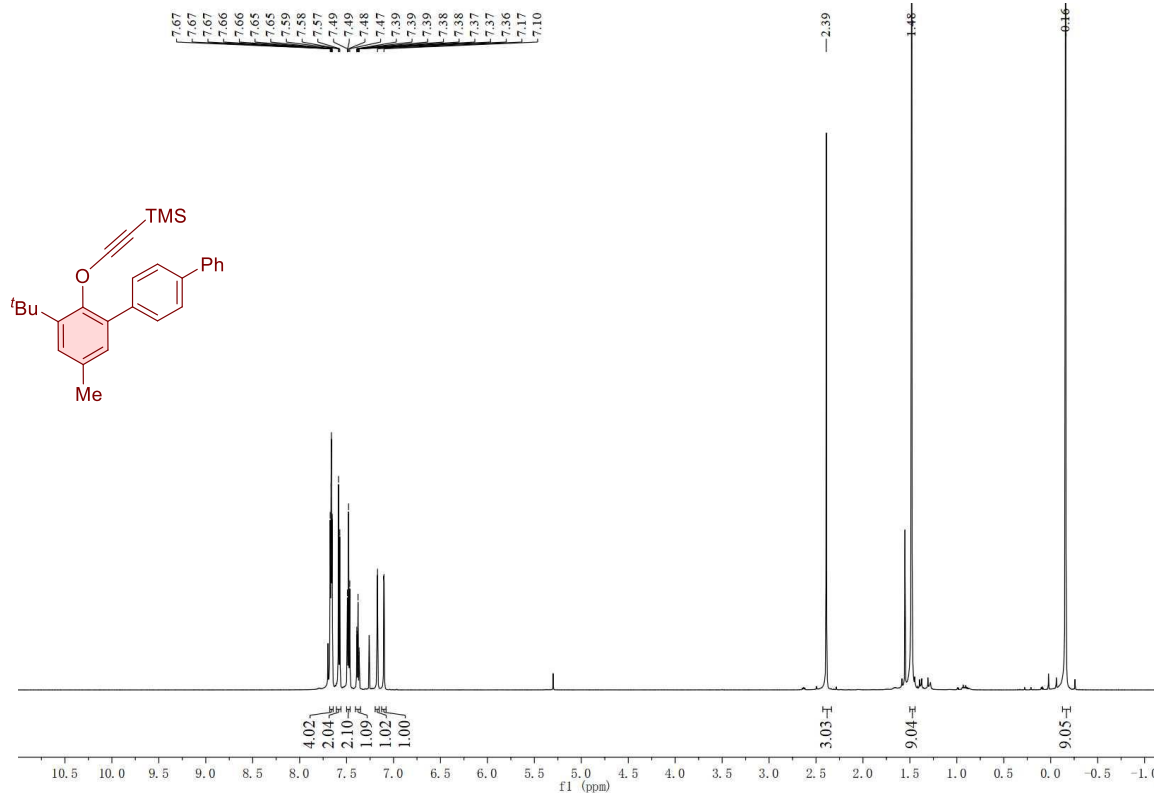

<sup>1</sup>H NMR spectrum of 1za (600 MHz, CDCl<sub>3</sub>)

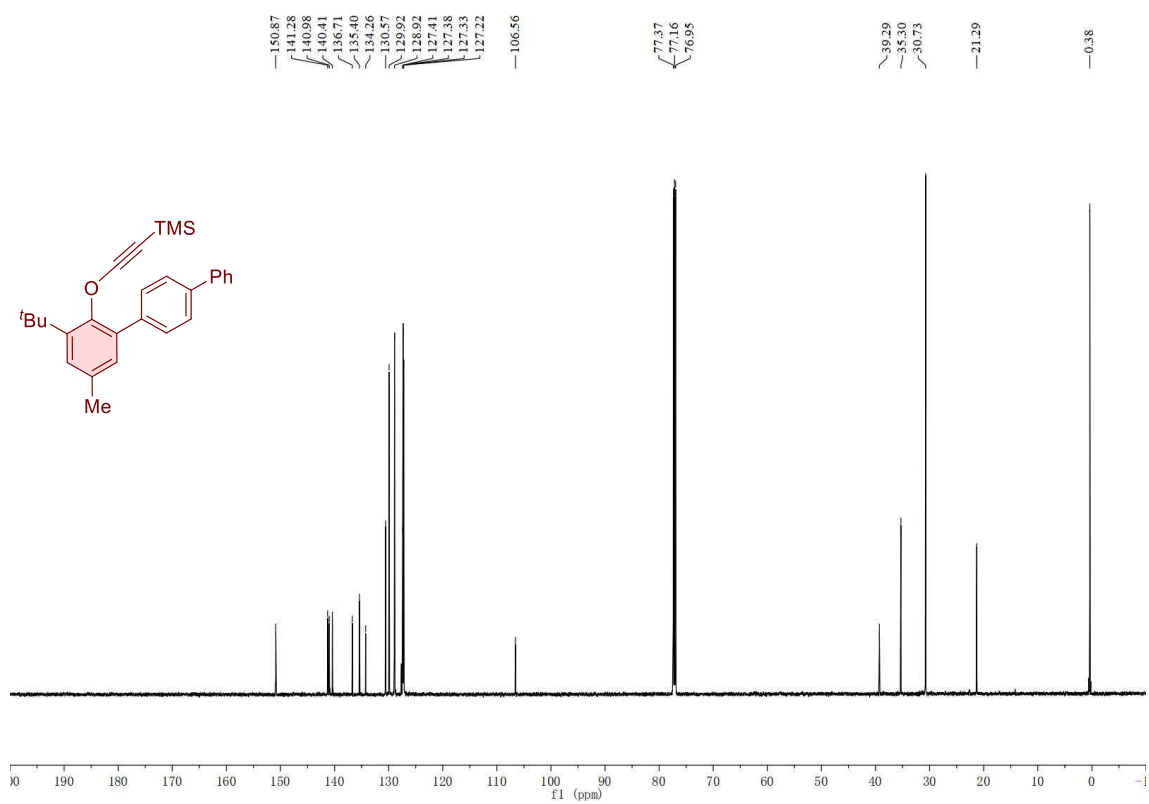

<sup>13</sup>C NMR spectrum of 1za (151 MHz, CDCl<sub>3</sub>)

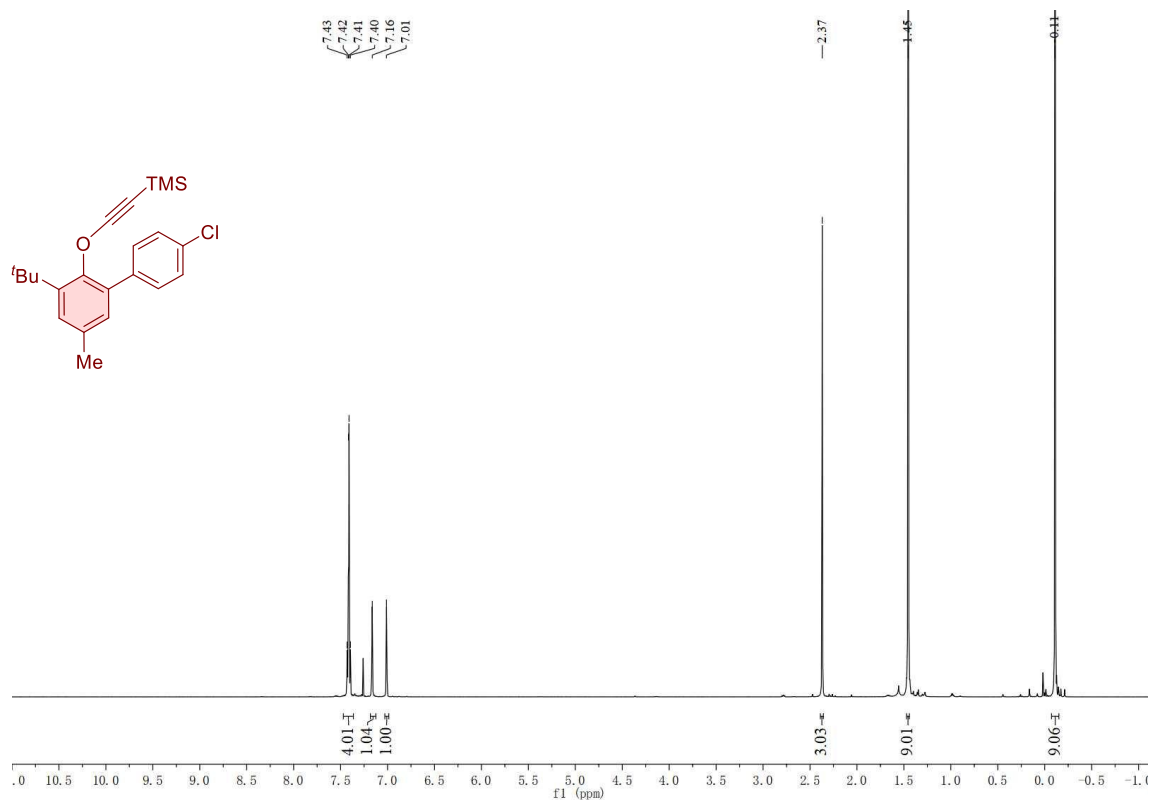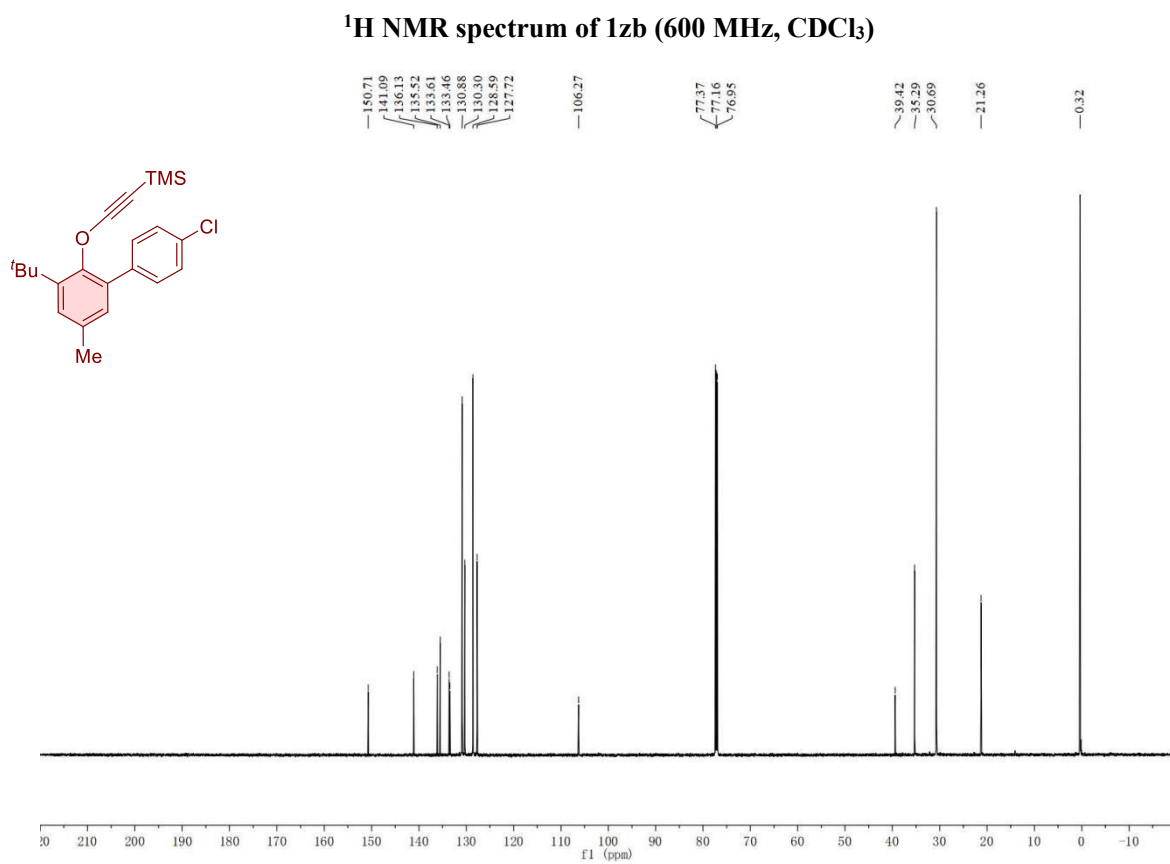

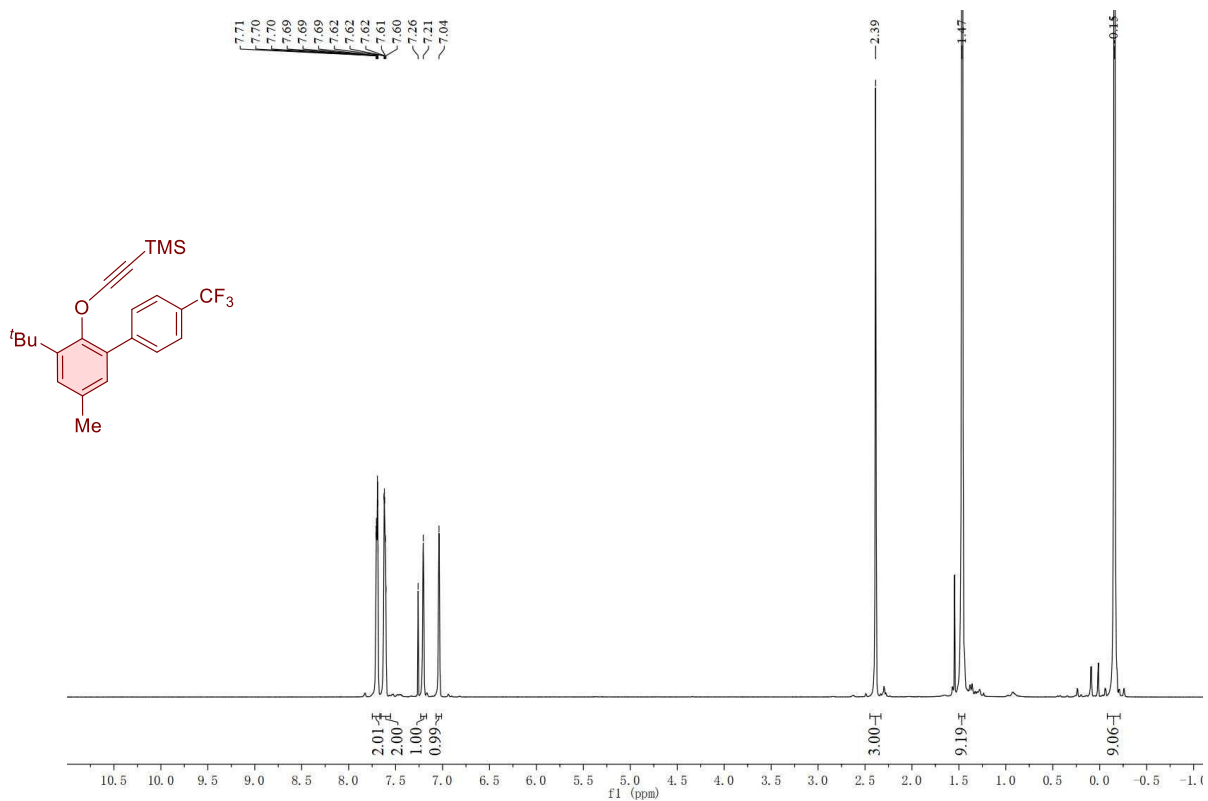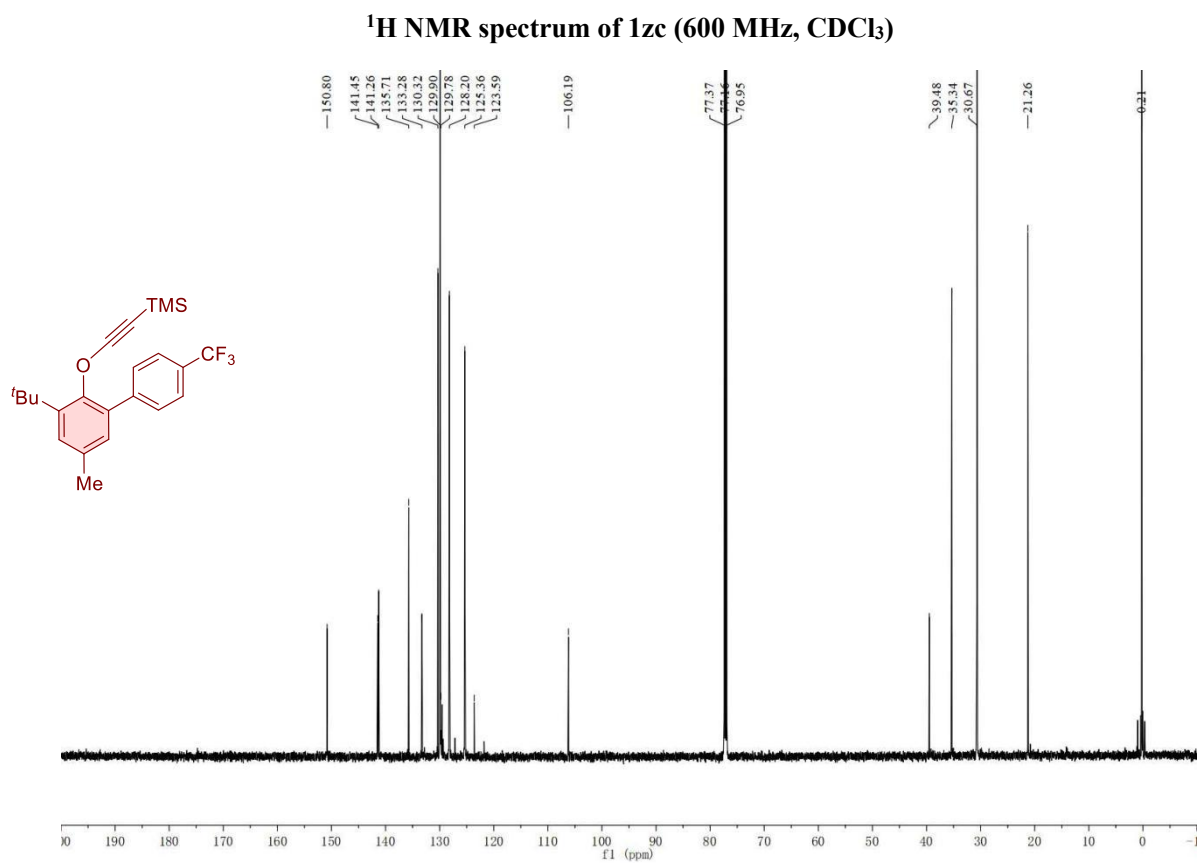

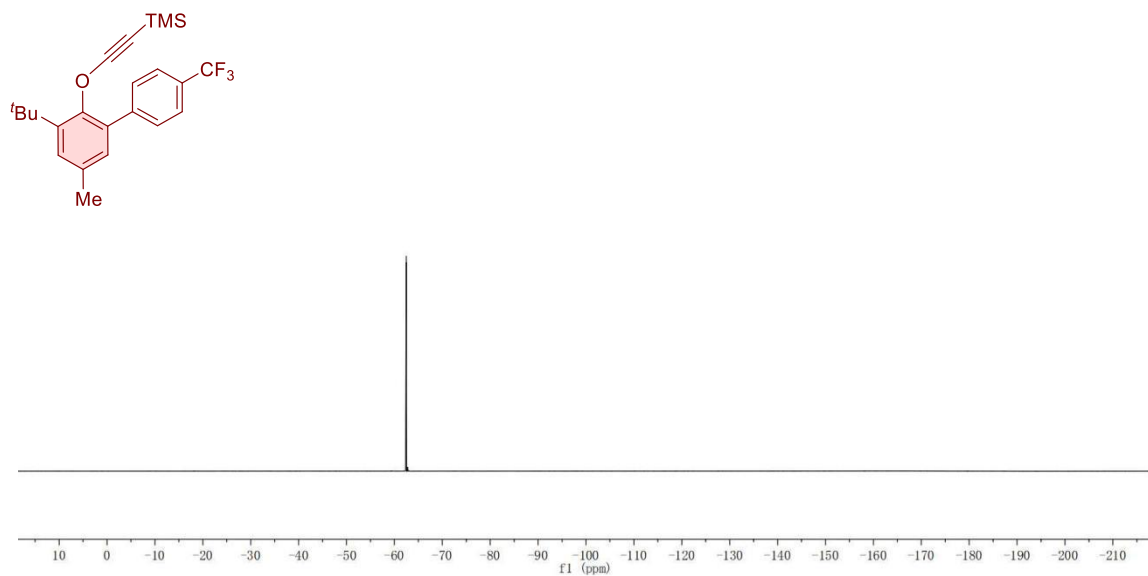

$^{19}\text{F}$  NMR spectrum of 1zc (565 MHz,  $\text{CDCl}_3$ )

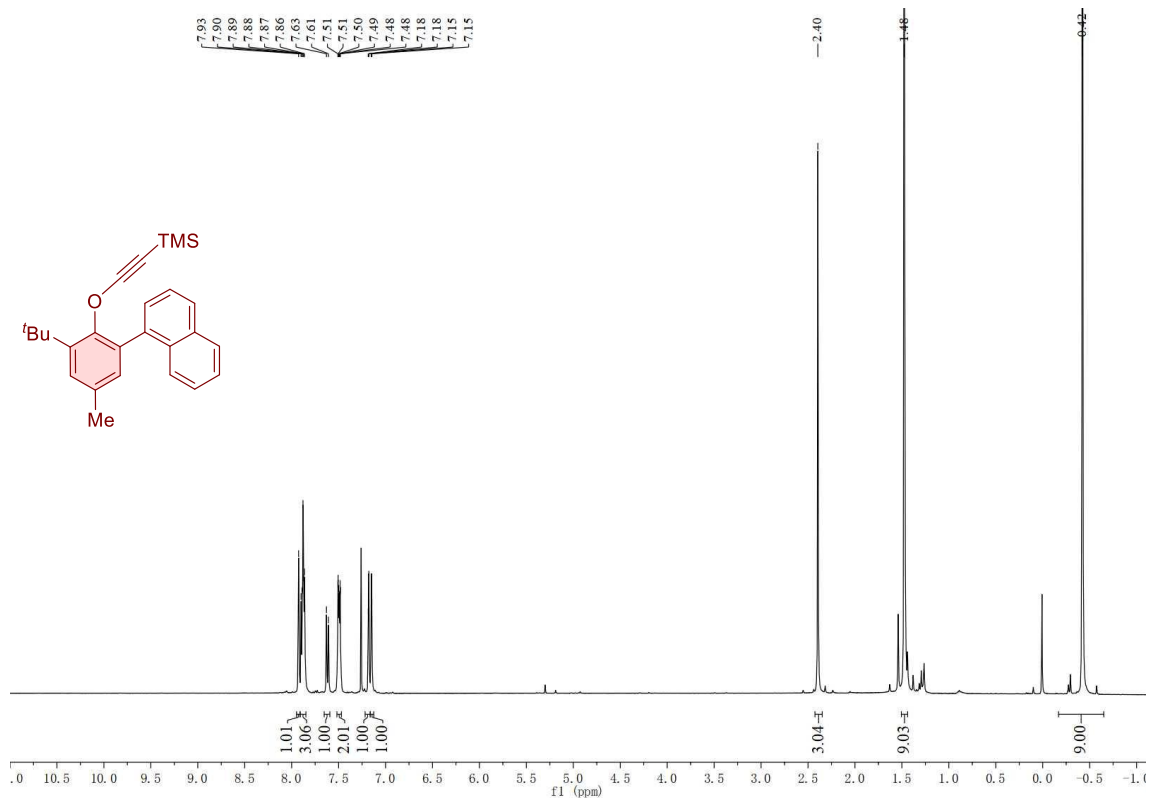

**<sup>1</sup>H NMR spectrum of 1zd (400 MHz, CDCl<sub>3</sub>)**

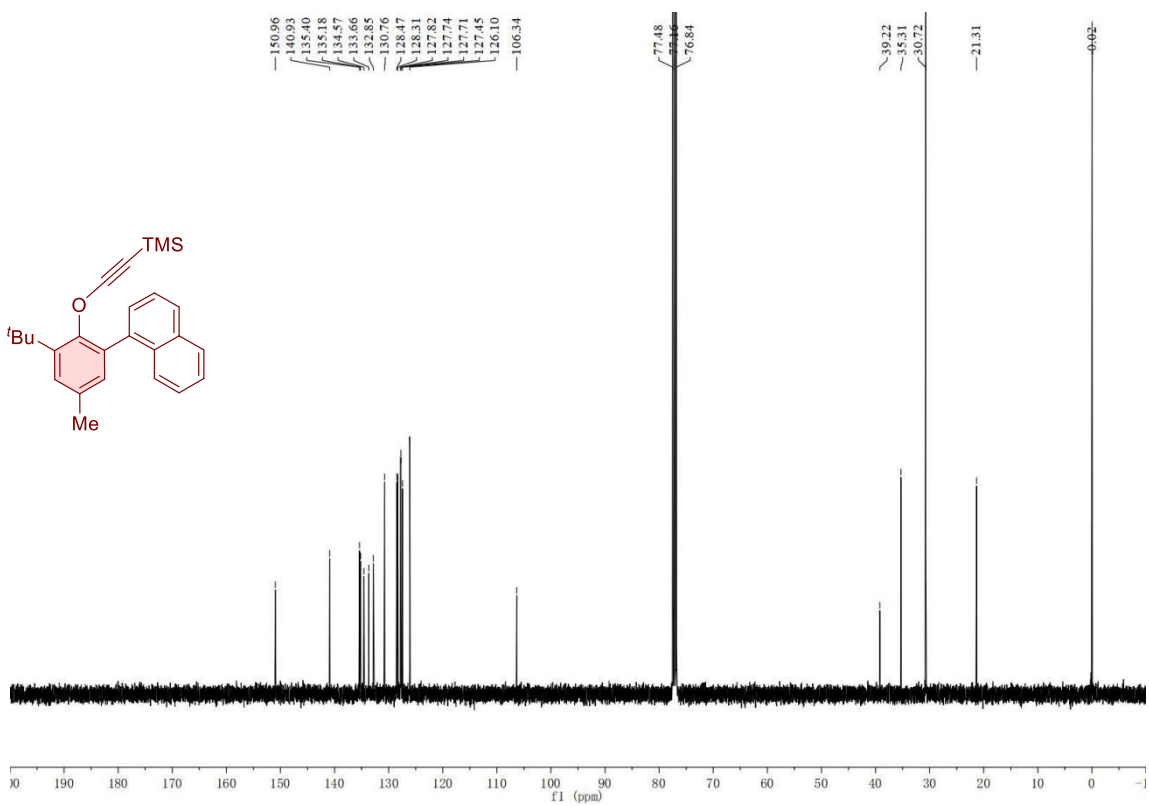

**<sup>13</sup>C NMR spectrum of 1zd (101 MHz, CDCl<sub>3</sub>)**

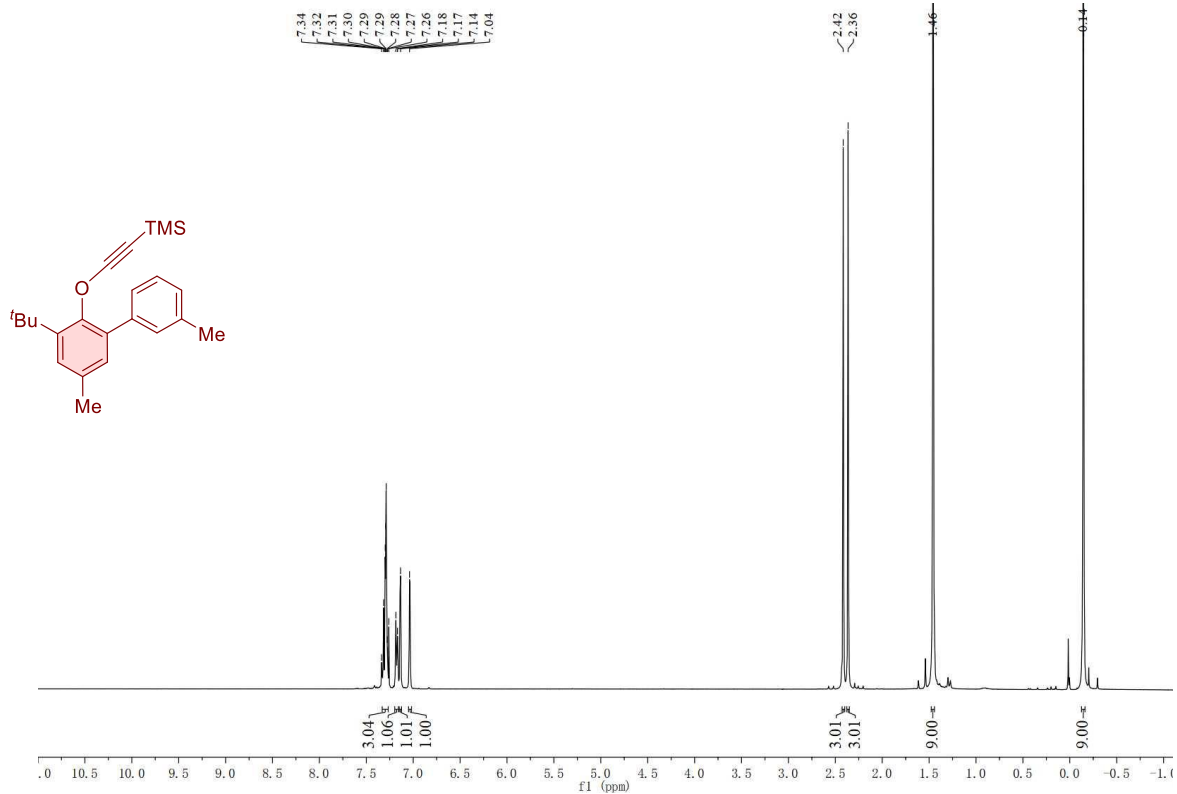

**<sup>1</sup>H NMR spectrum of 1ze (400 MHz, CDCl<sub>3</sub>)**

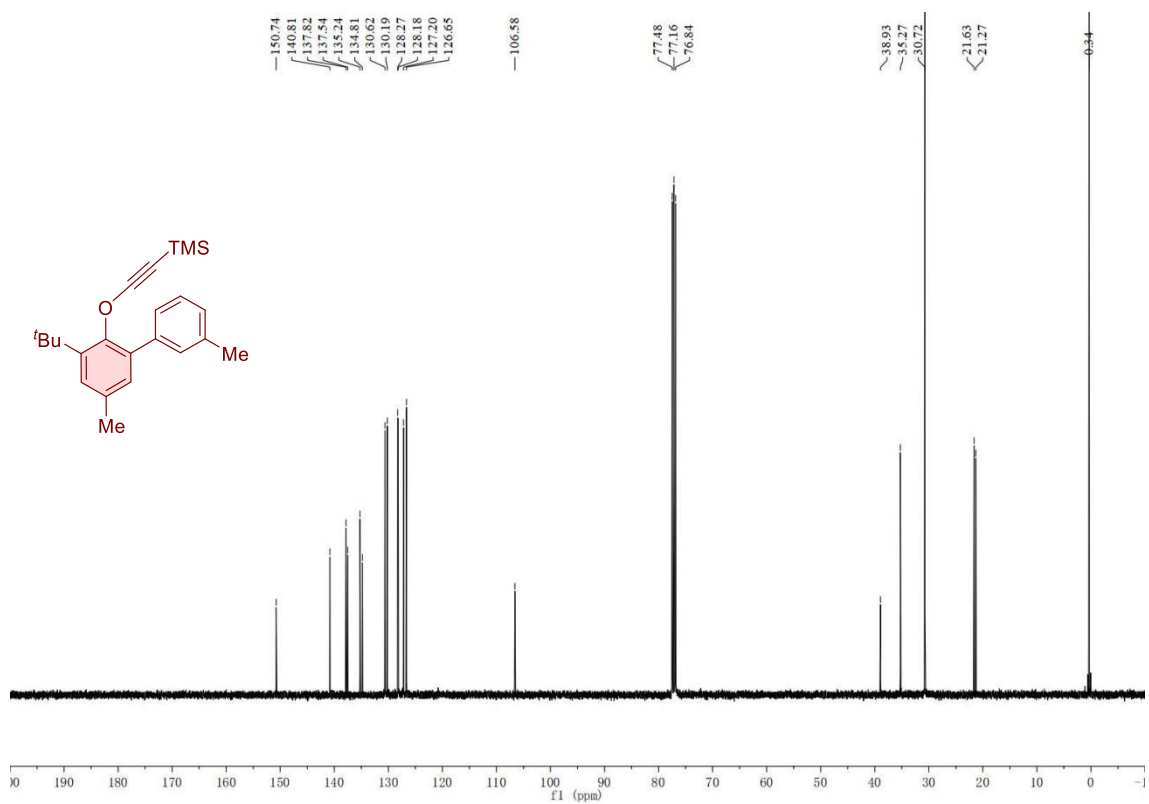

**<sup>13</sup>C NMR spectrum of 1ze (101 MHz, CDCl<sub>3</sub>)**

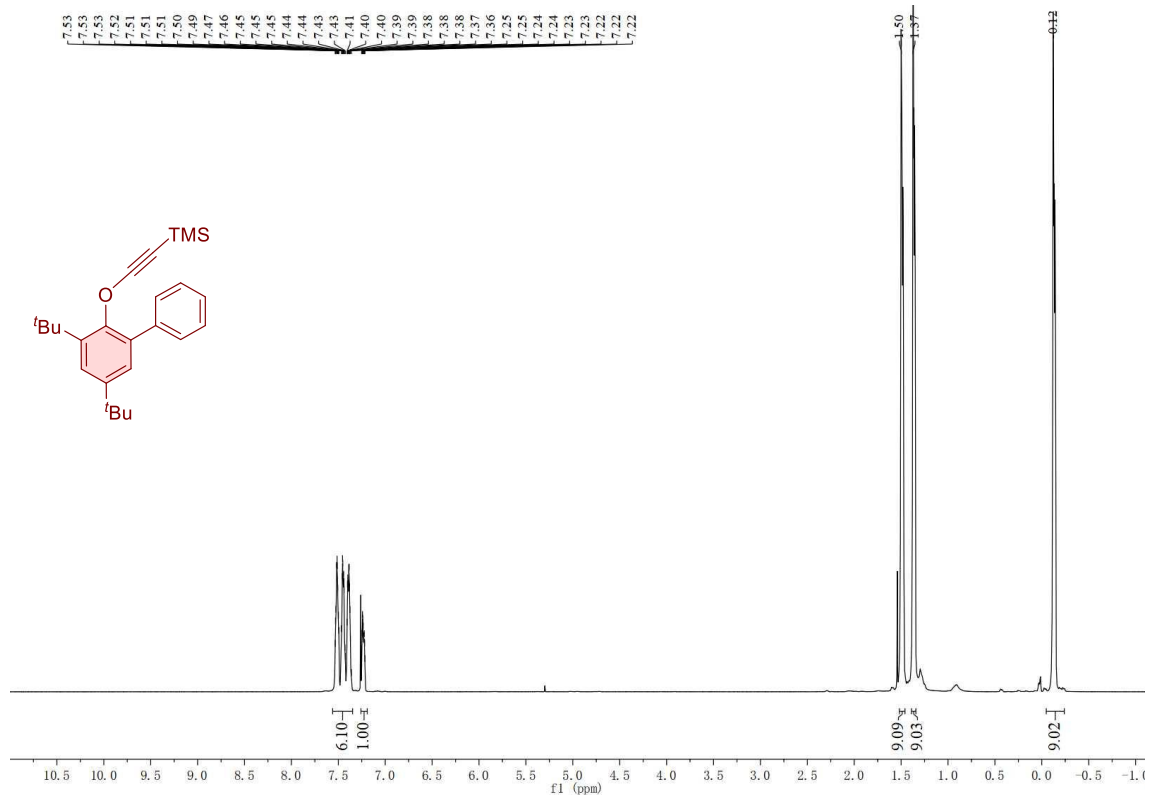

<sup>1</sup>H NMR spectrum of 1zf (600 MHz, CDCl<sub>3</sub>)

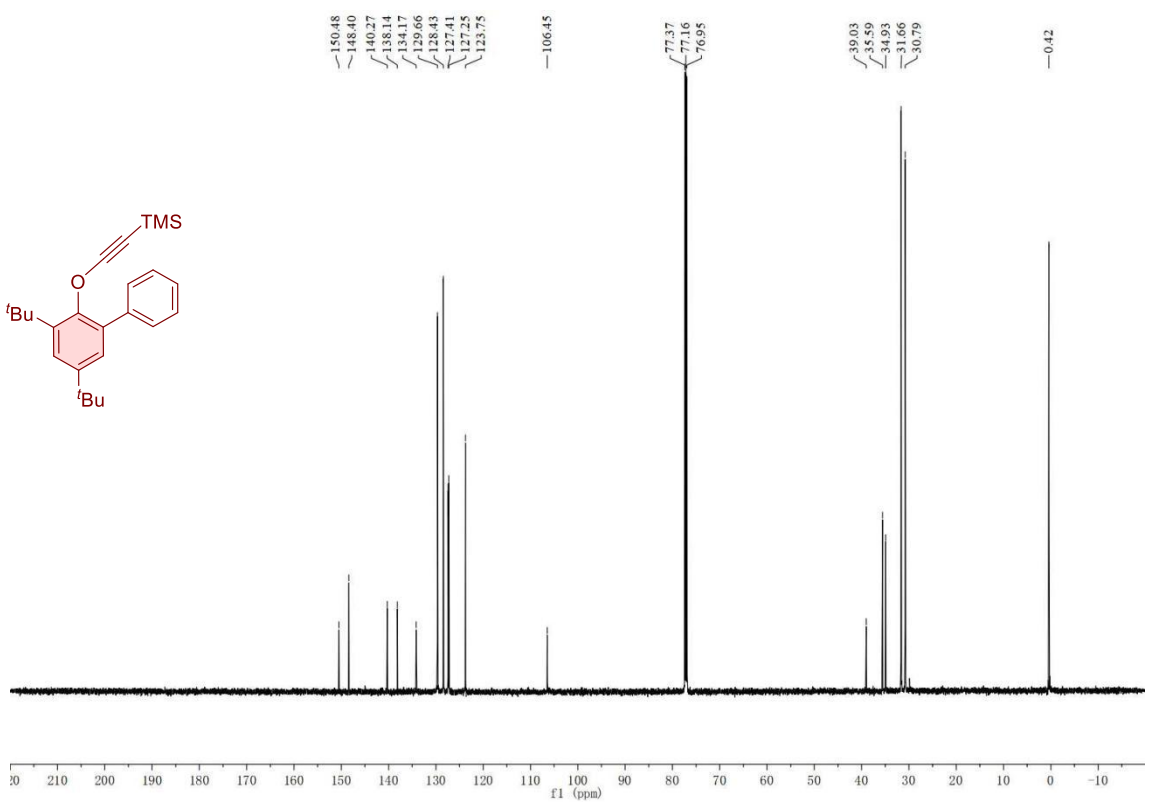

<sup>13</sup>C NMR spectrum of 1zf (151 MHz, CDCl<sub>3</sub>)

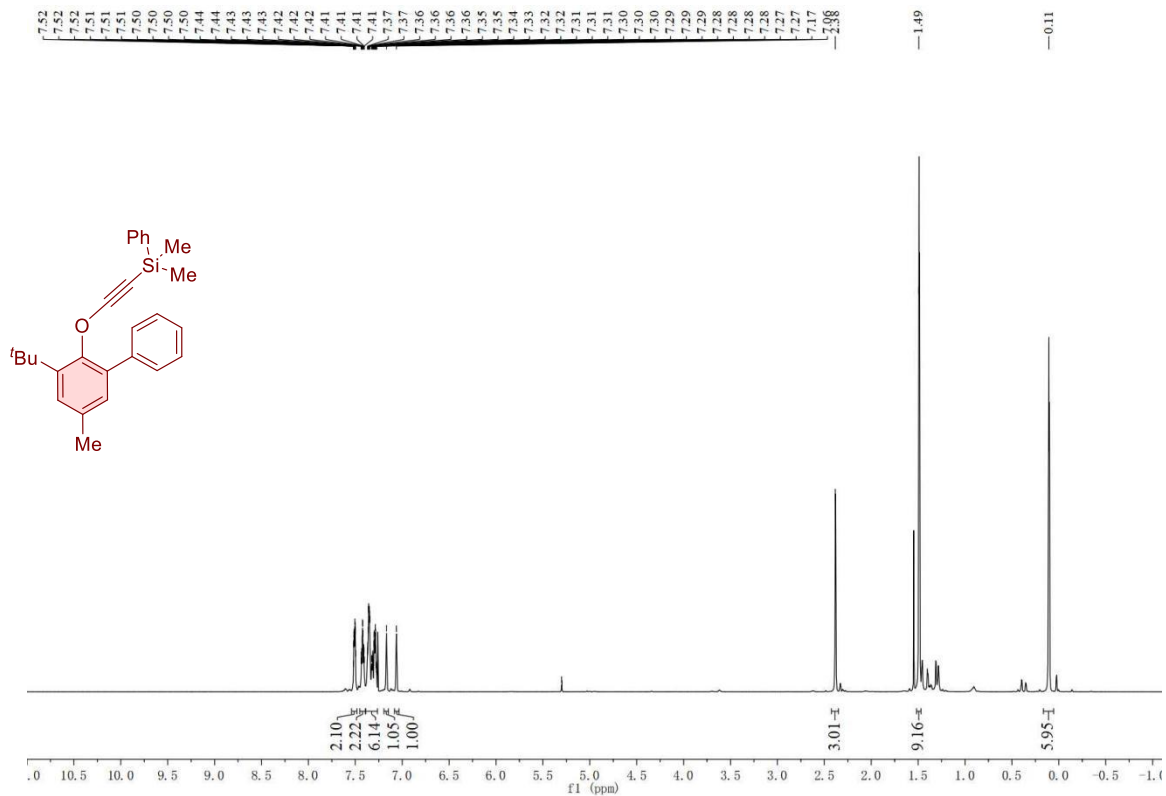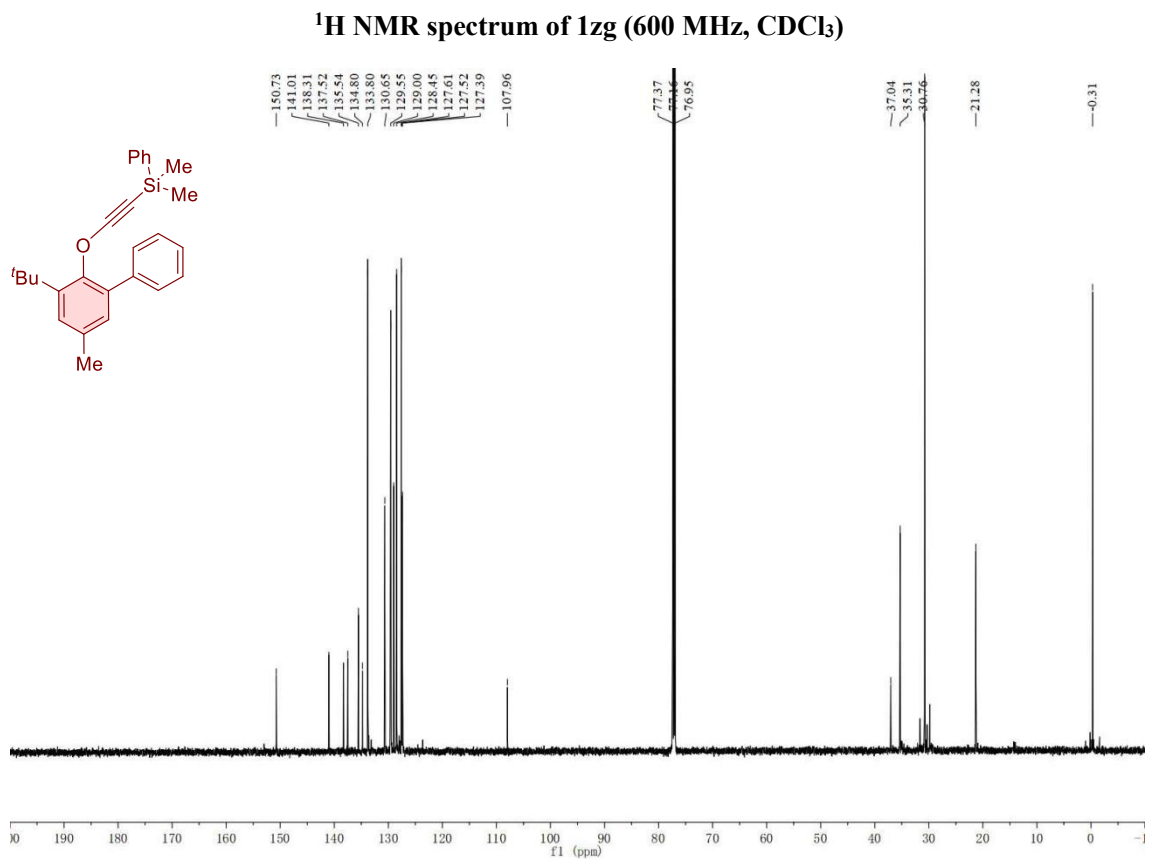

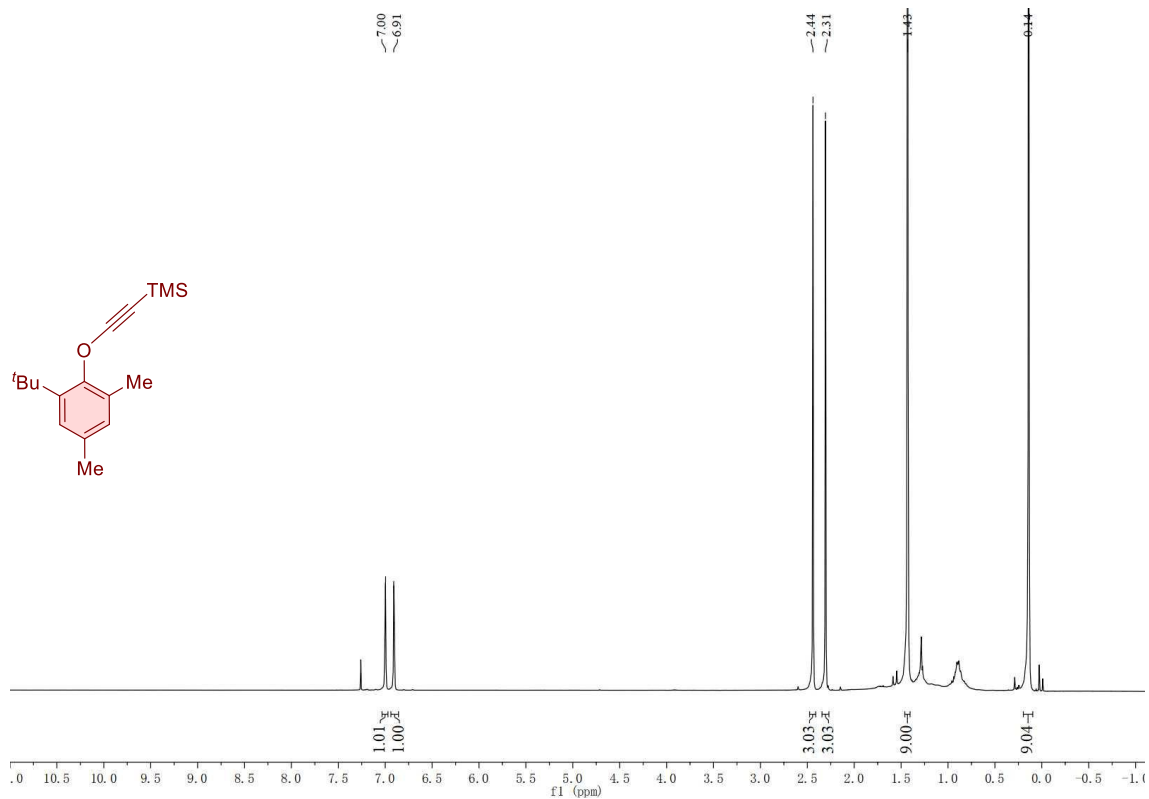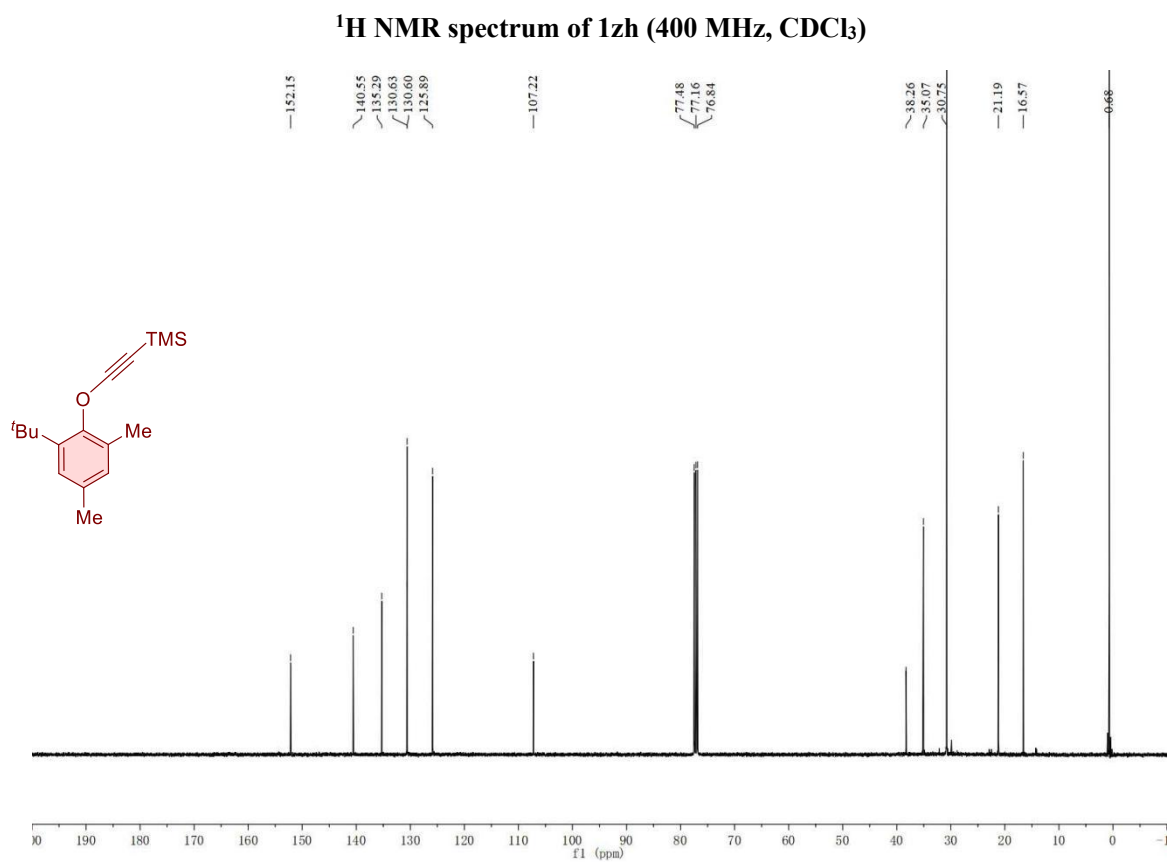

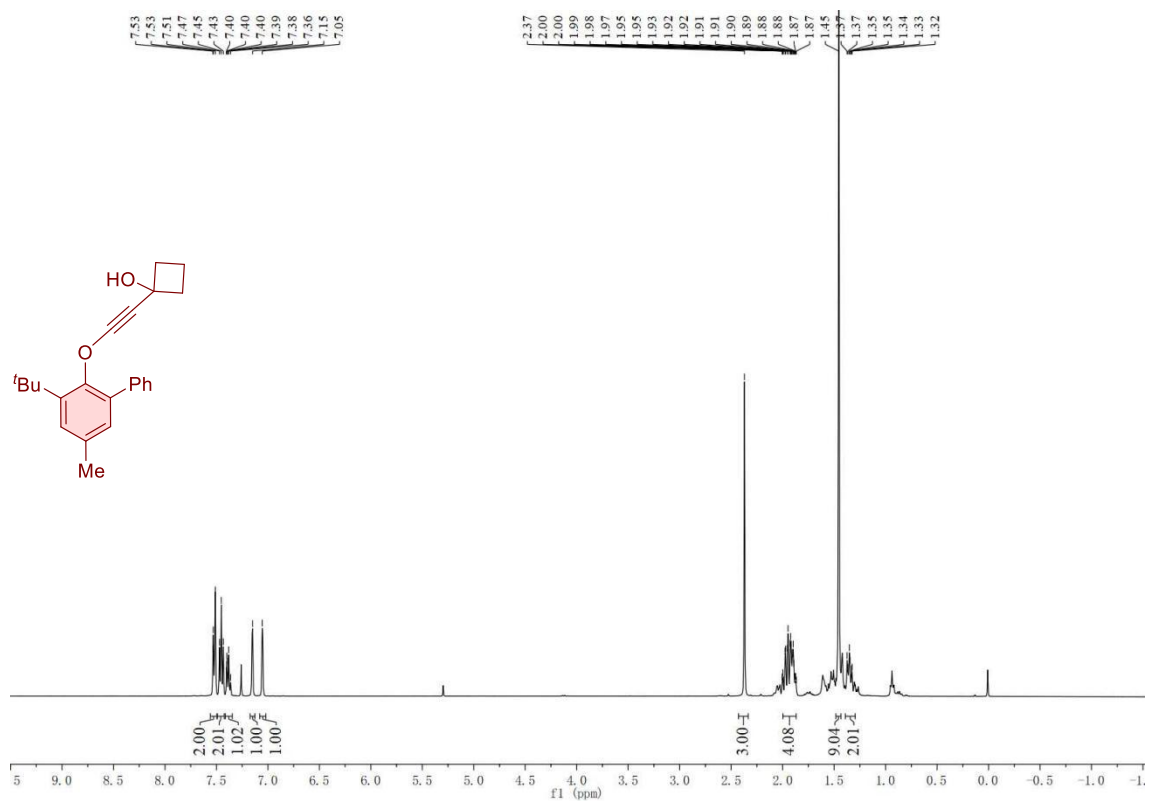

**<sup>1</sup>H NMR spectrum of 1zi (400 MHz, CDCl<sub>3</sub>)**

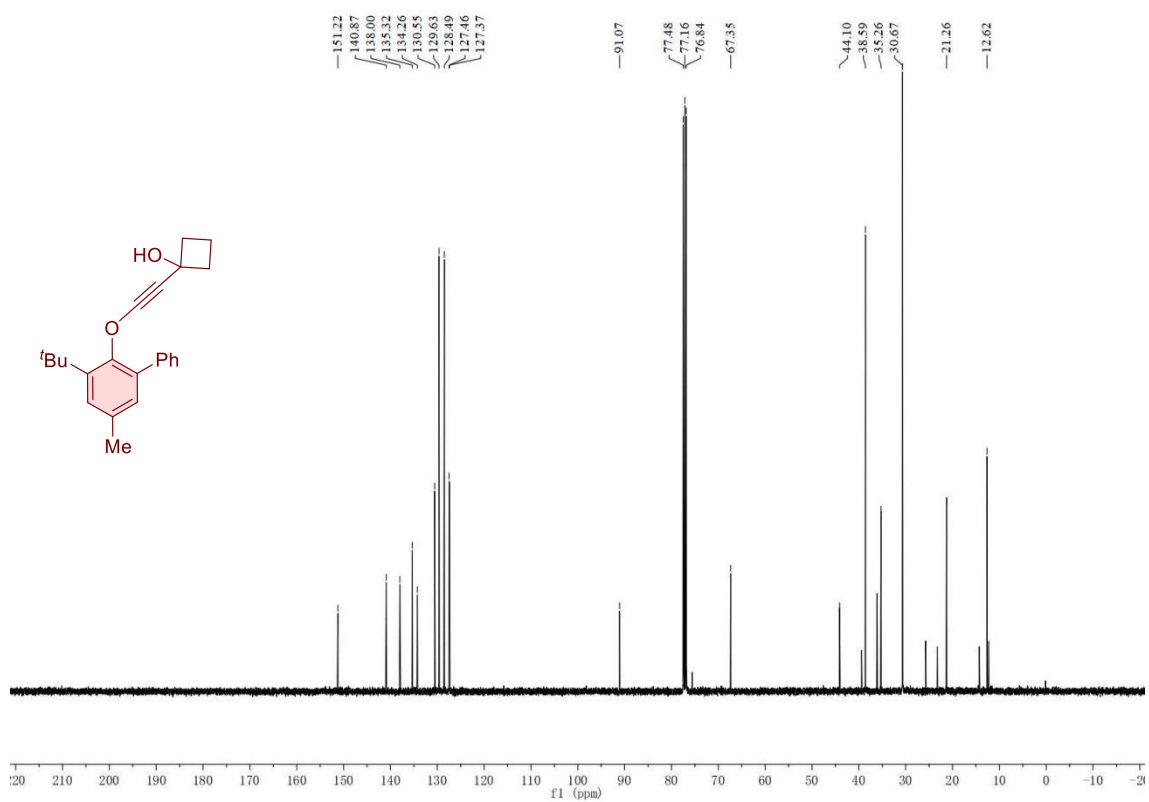

**<sup>13</sup>C NMR spectrum of 1zi (101 MHz, CDCl<sub>3</sub>)**

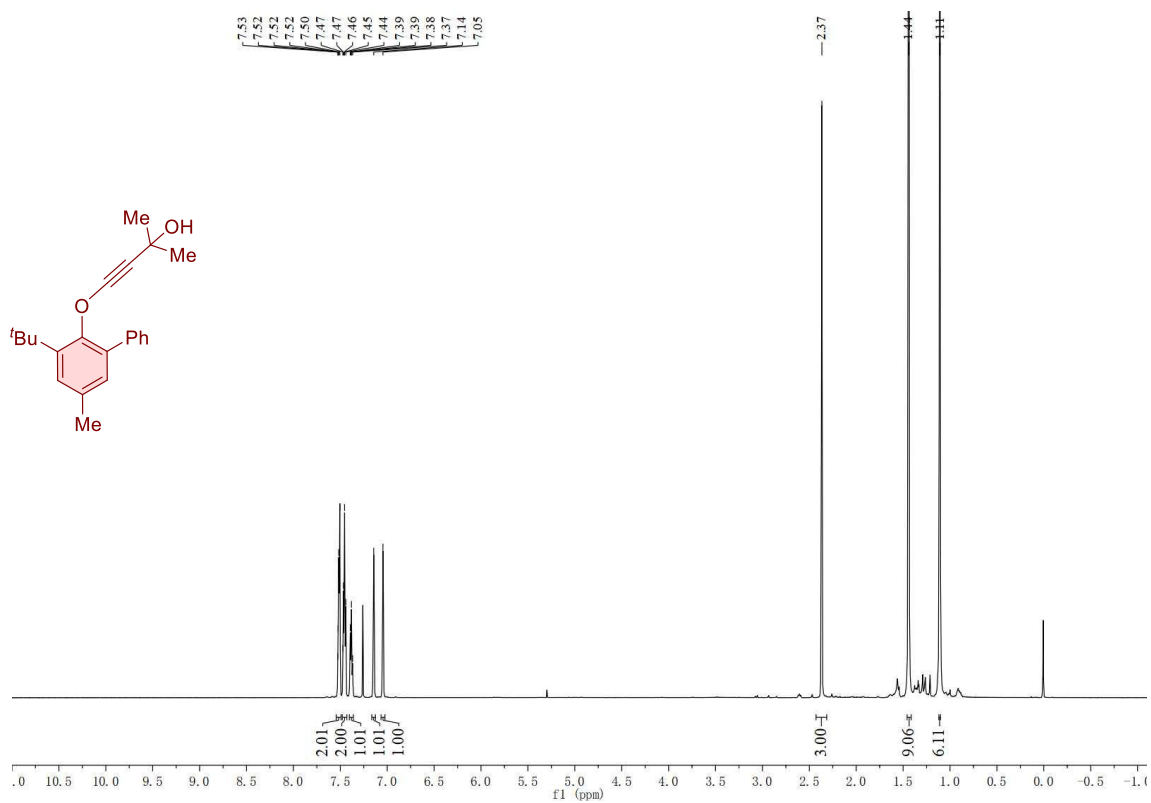

**<sup>1</sup>H NMR spectrum of 1zj (600 MHz, CDCl<sub>3</sub>)**

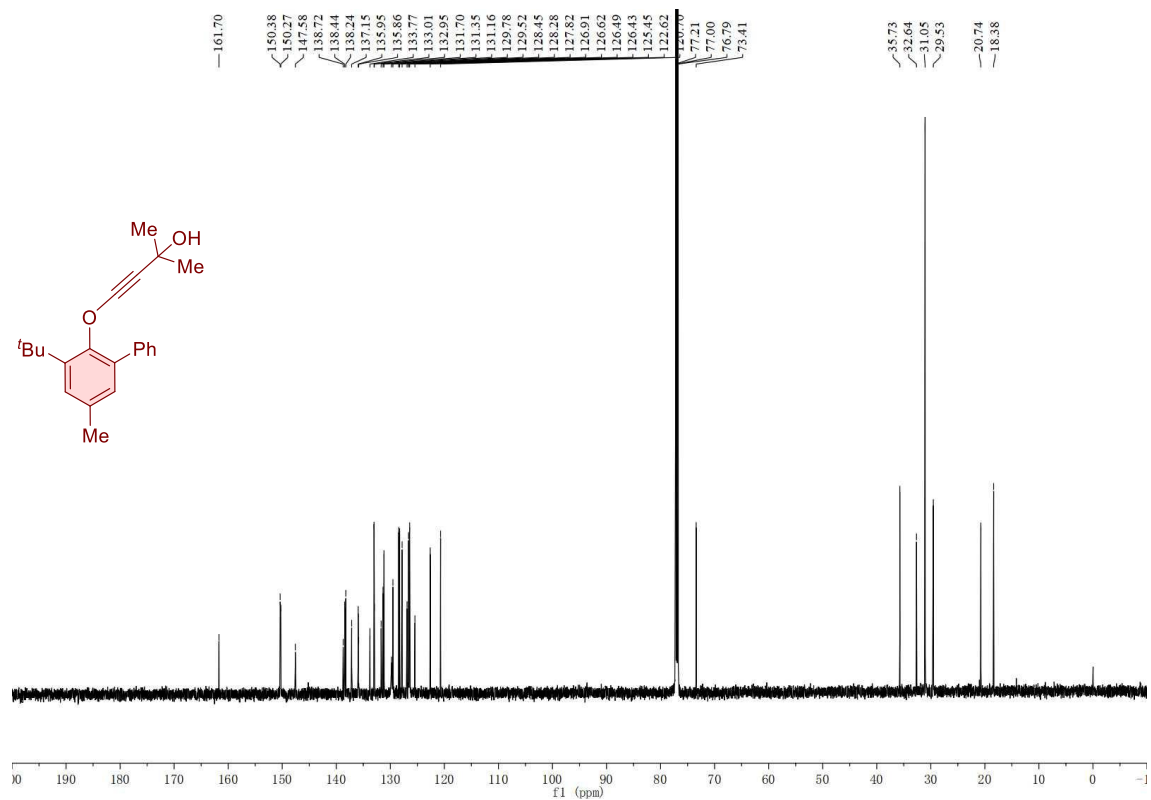

**<sup>13</sup>C NMR spectrum of 1zj (151 MHz, CDCl<sub>3</sub>)**

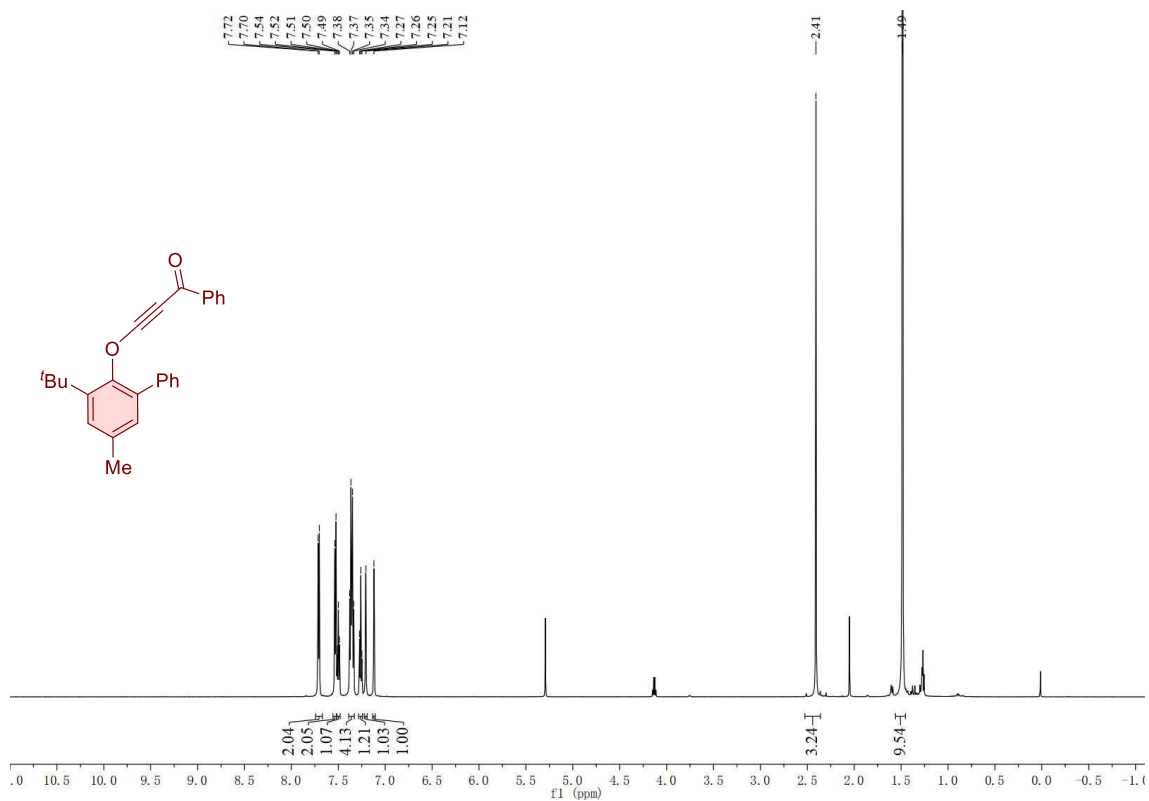

**<sup>1</sup>H NMR spectrum of 1zk (600 MHz, CDCl<sub>3</sub>)**

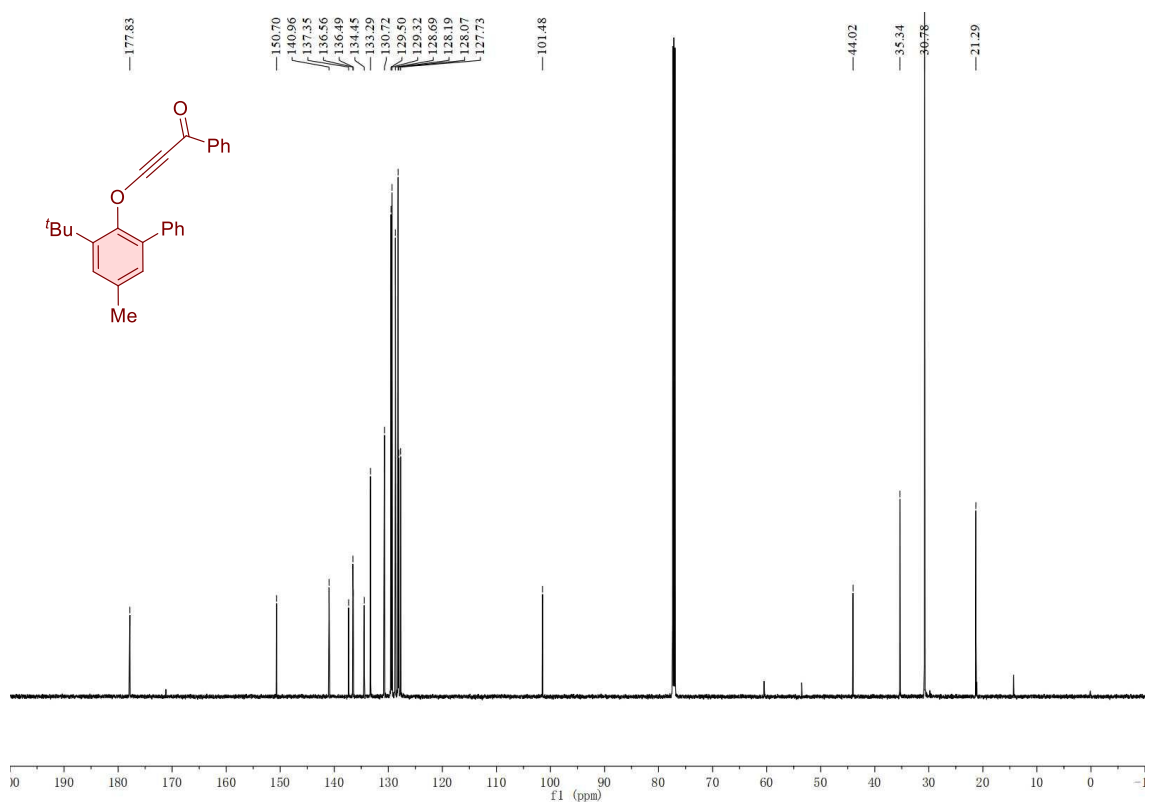

**<sup>13</sup>C NMR spectrum of 1zk (151 MHz, CDCl<sub>3</sub>)**

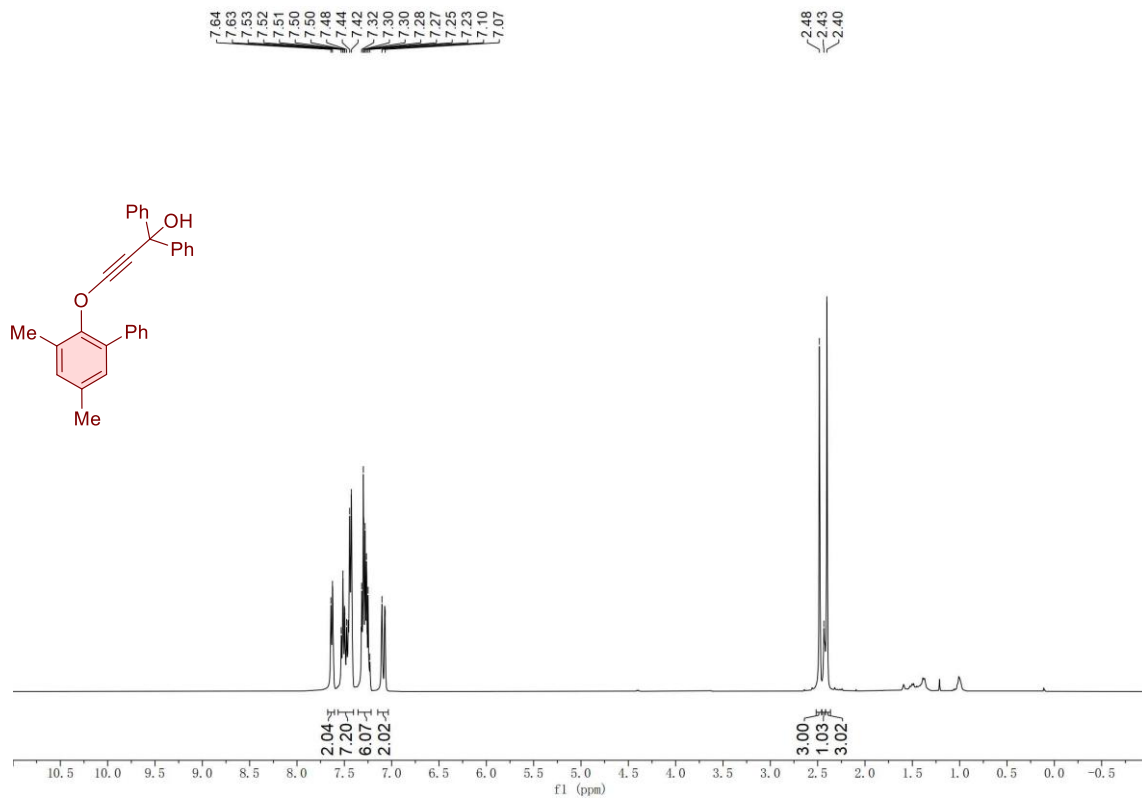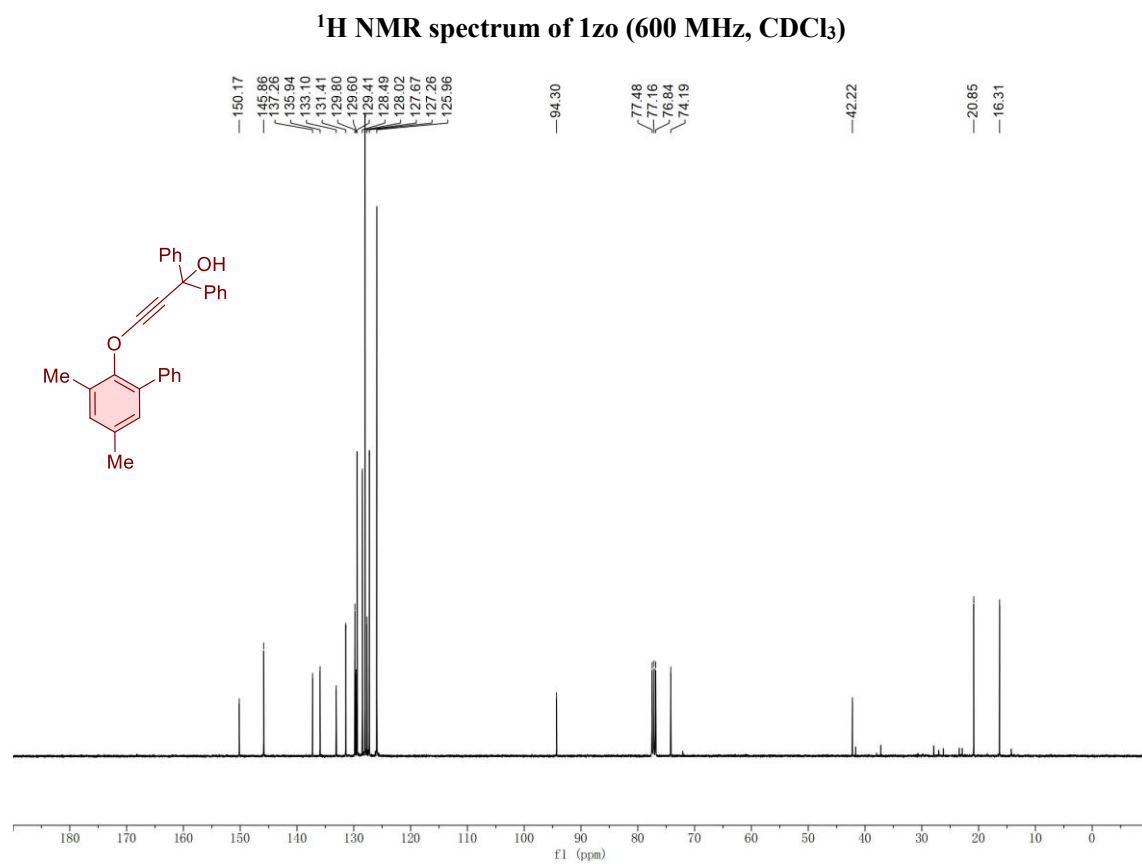

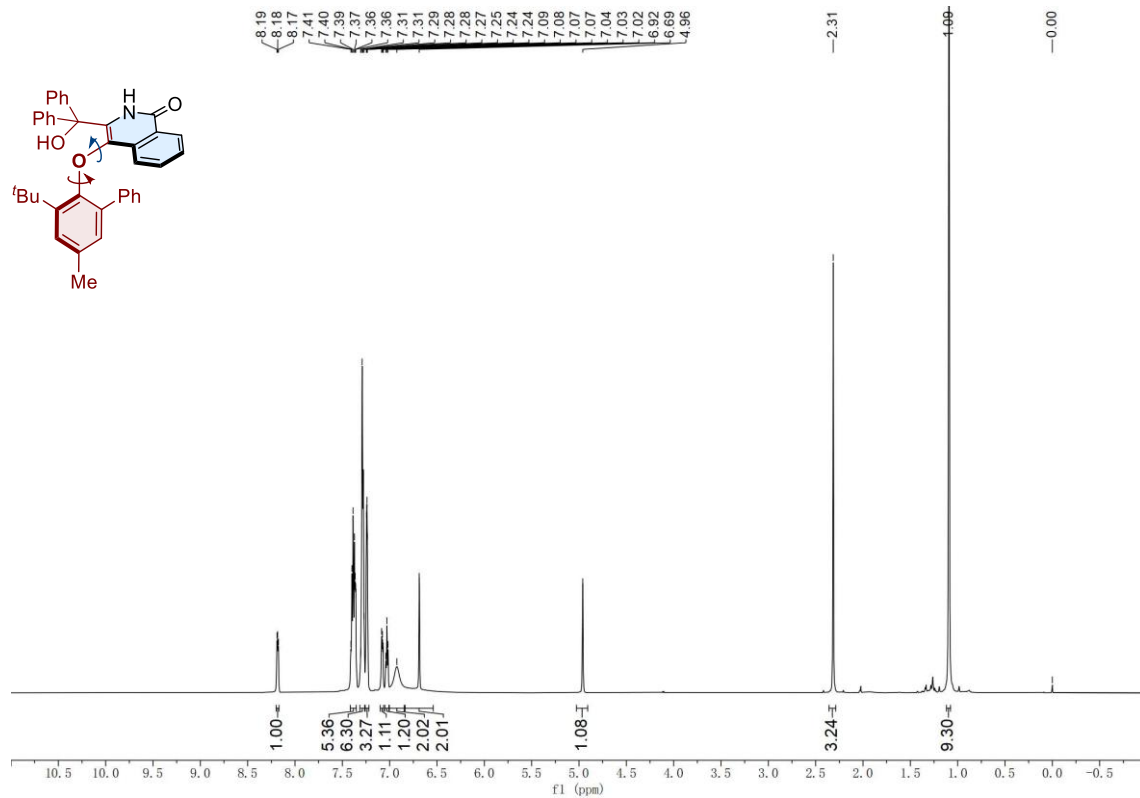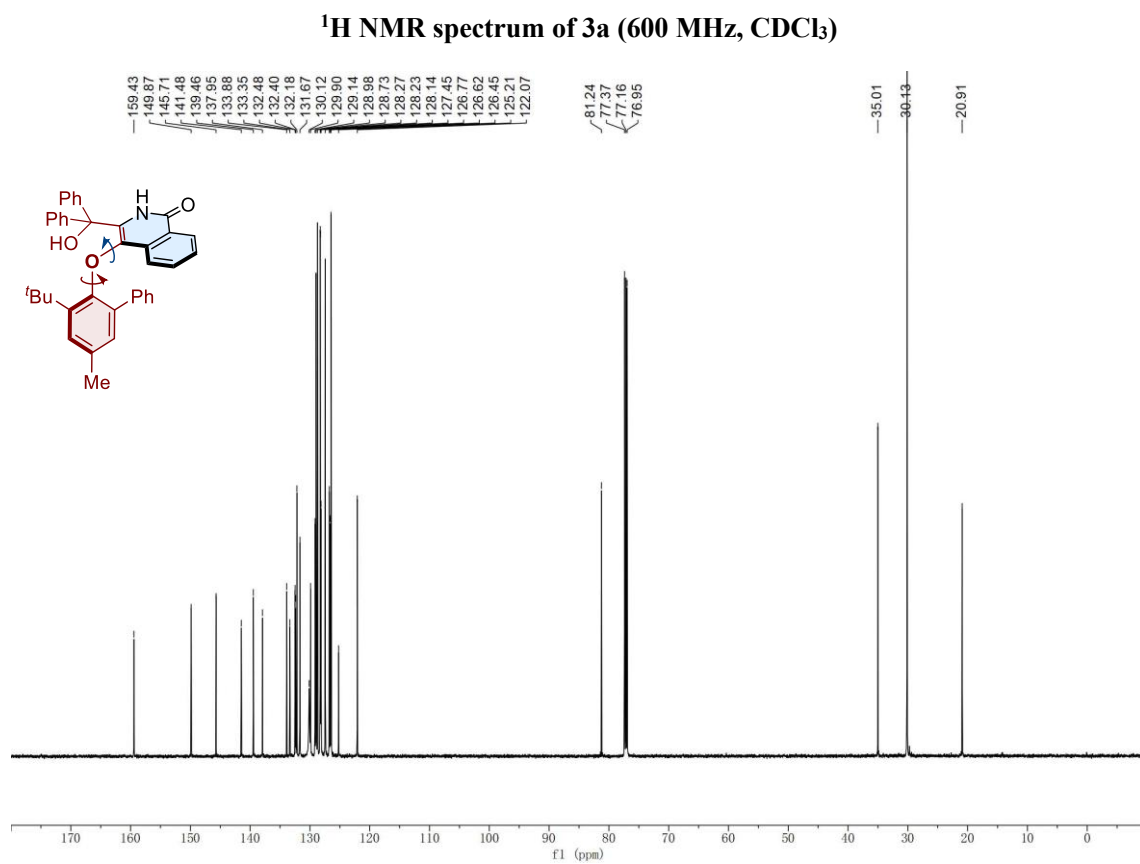

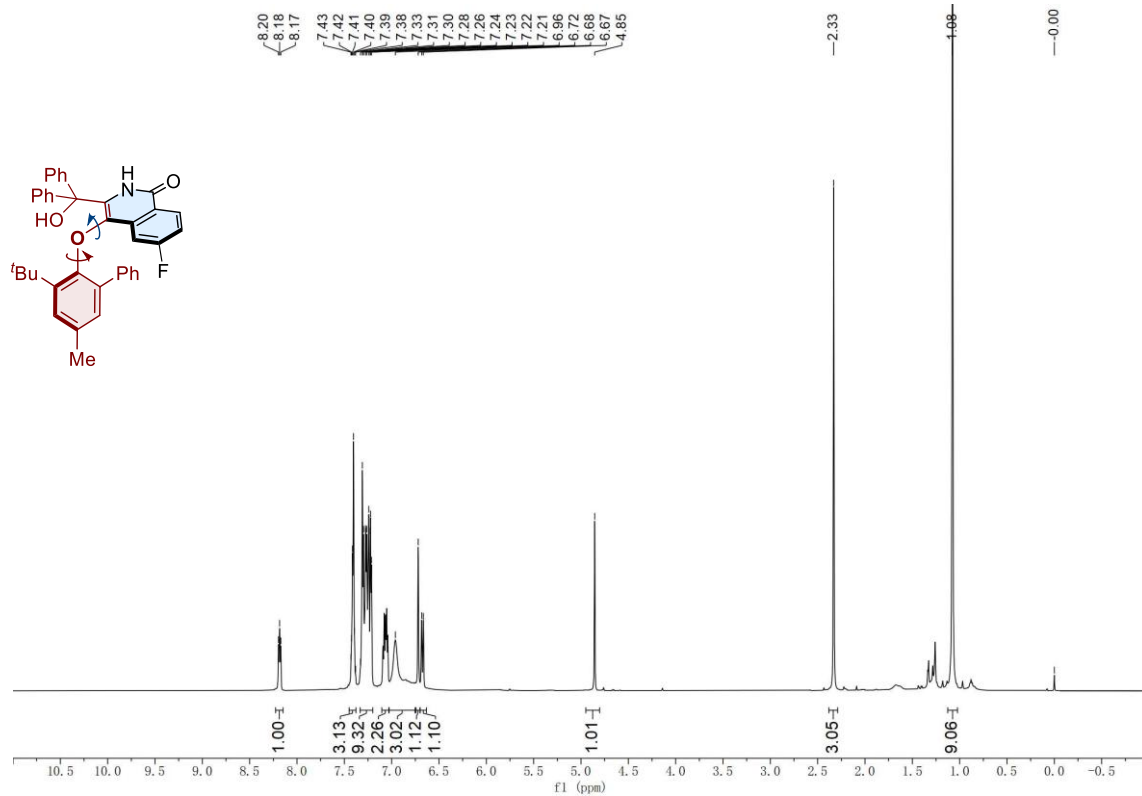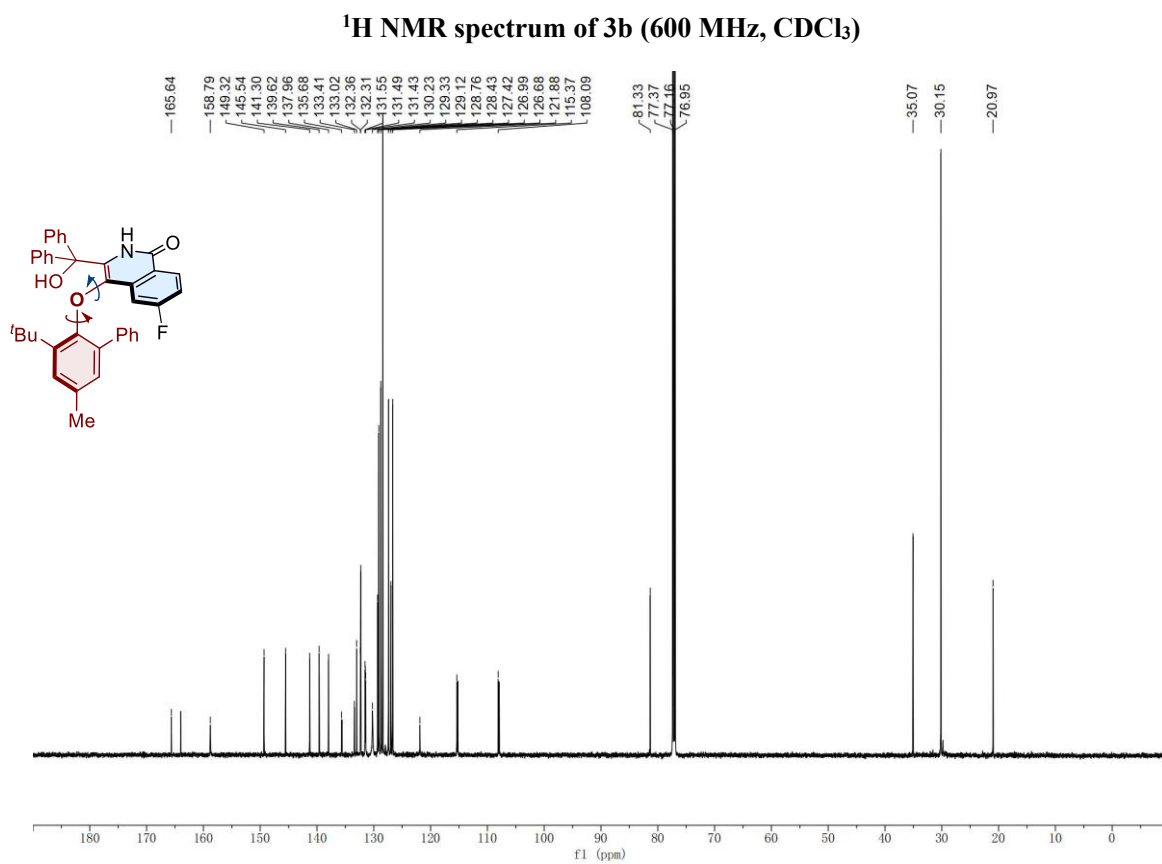

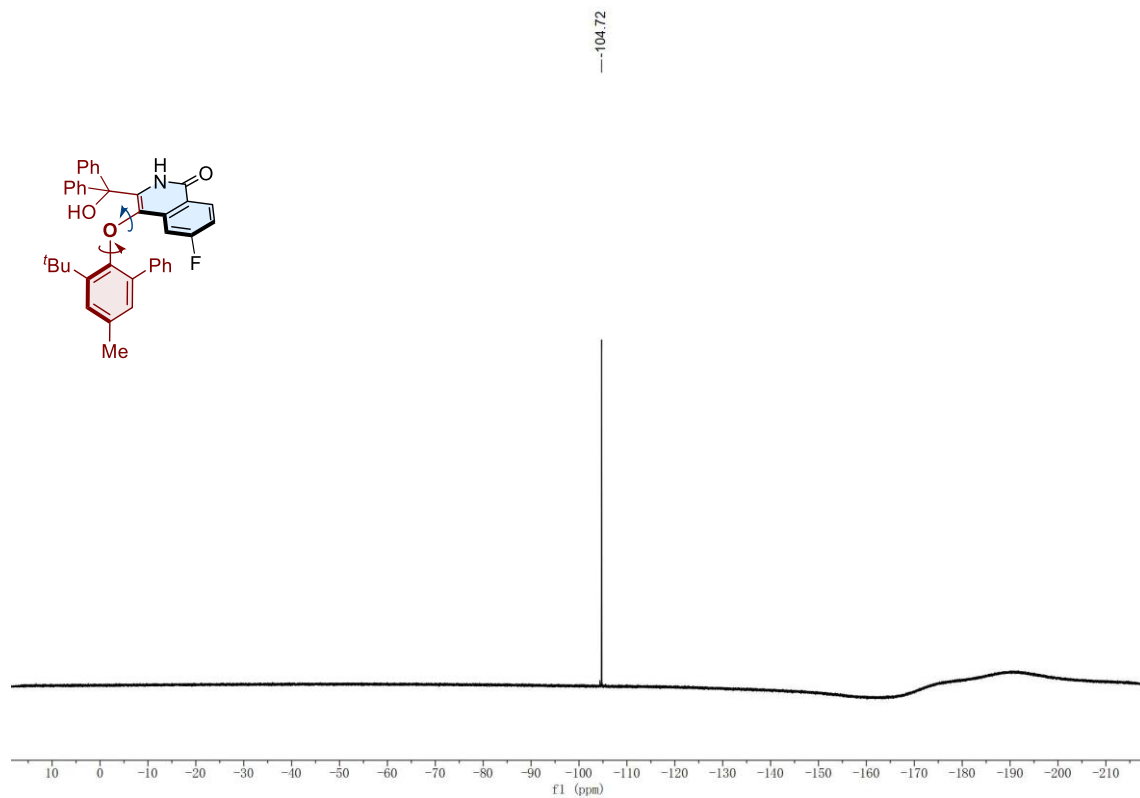

$^{19}\text{F}$  NMR spectrum of 3b (565 MHz,  $\text{CDCl}_3$ )

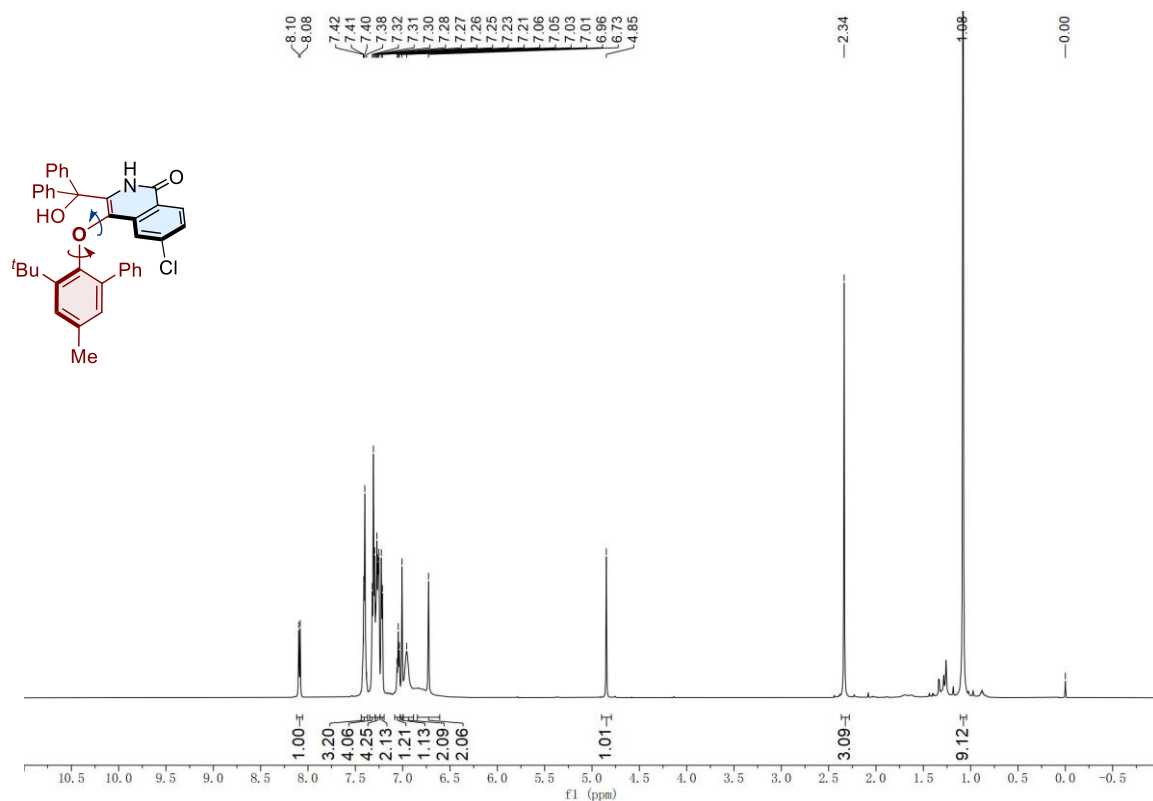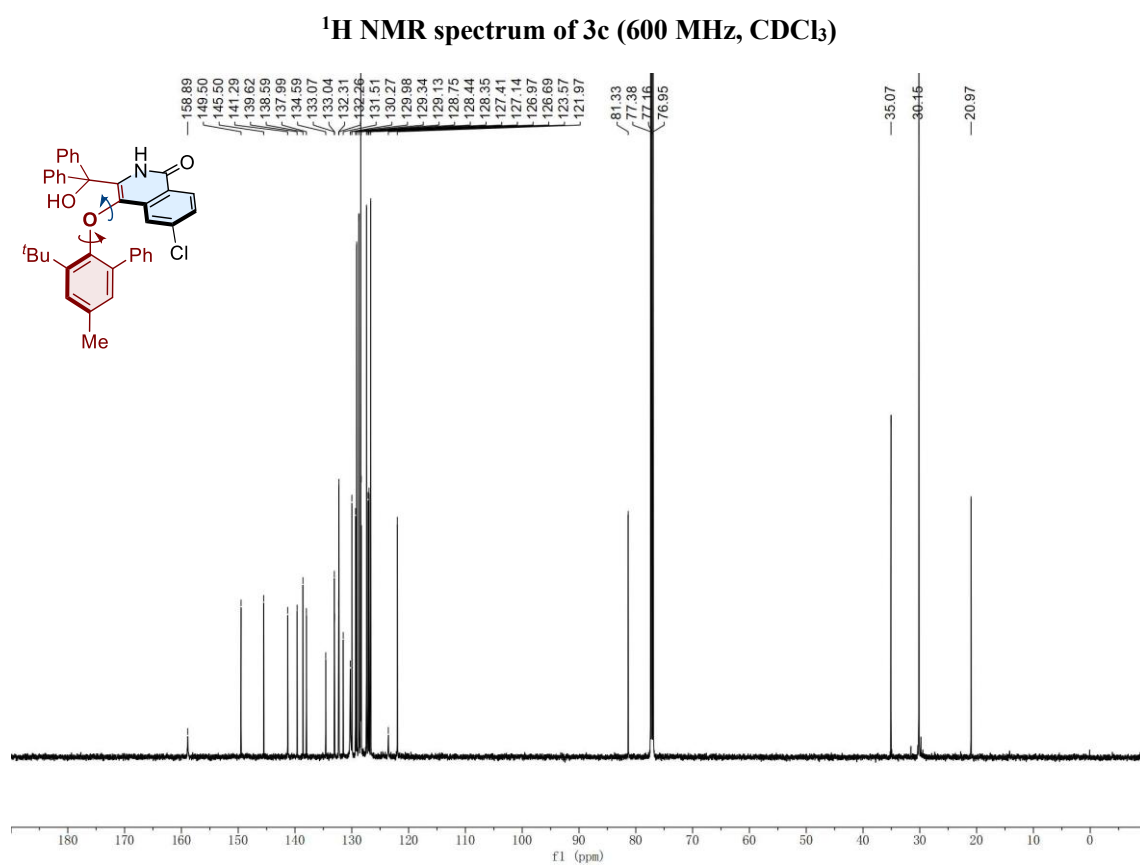

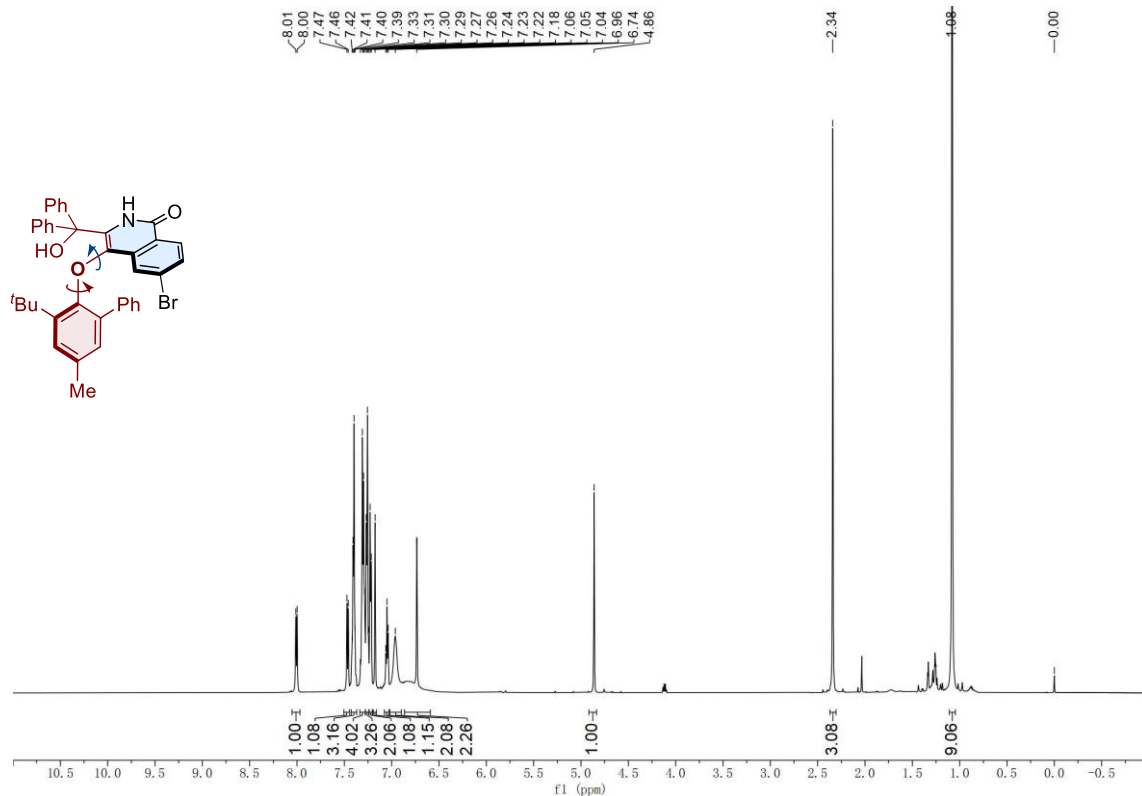

**<sup>1</sup>H NMR spectrum of 3d (600 MHz, CDCl<sub>3</sub>)**

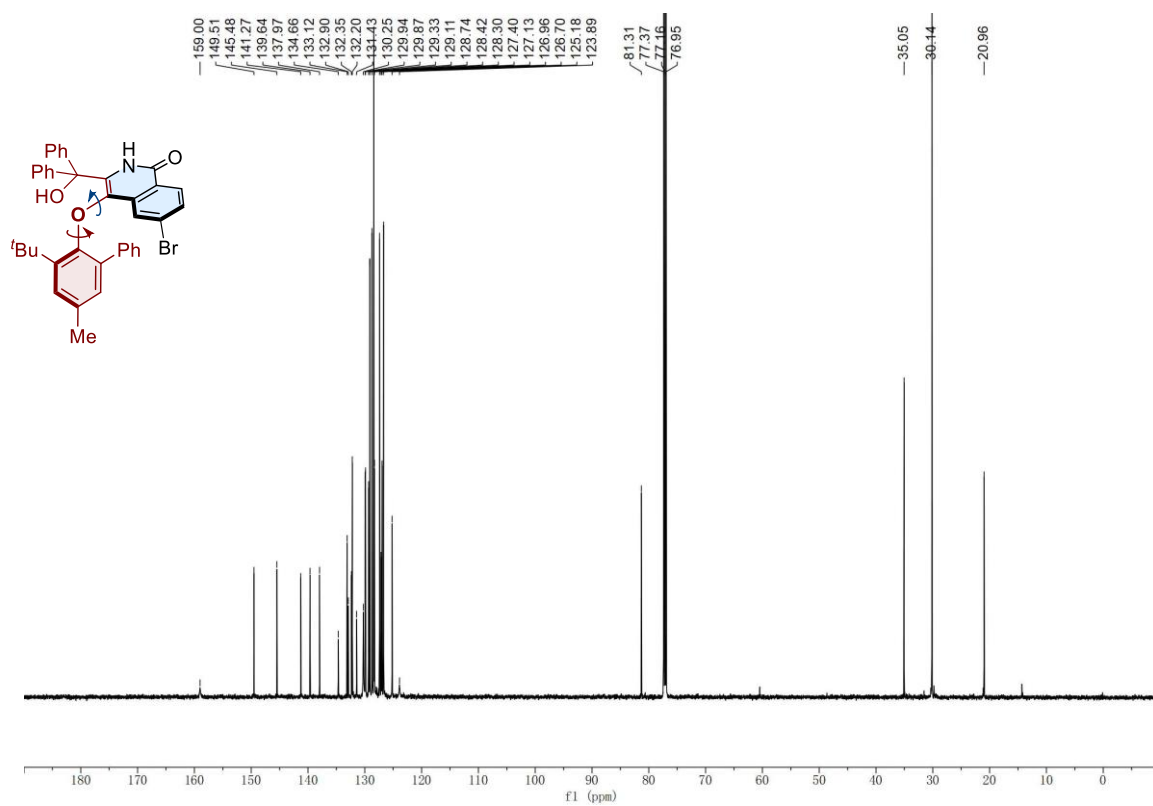

**<sup>13</sup>C NMR spectrum of 3d (151 MHz, CDCl<sub>3</sub>)**

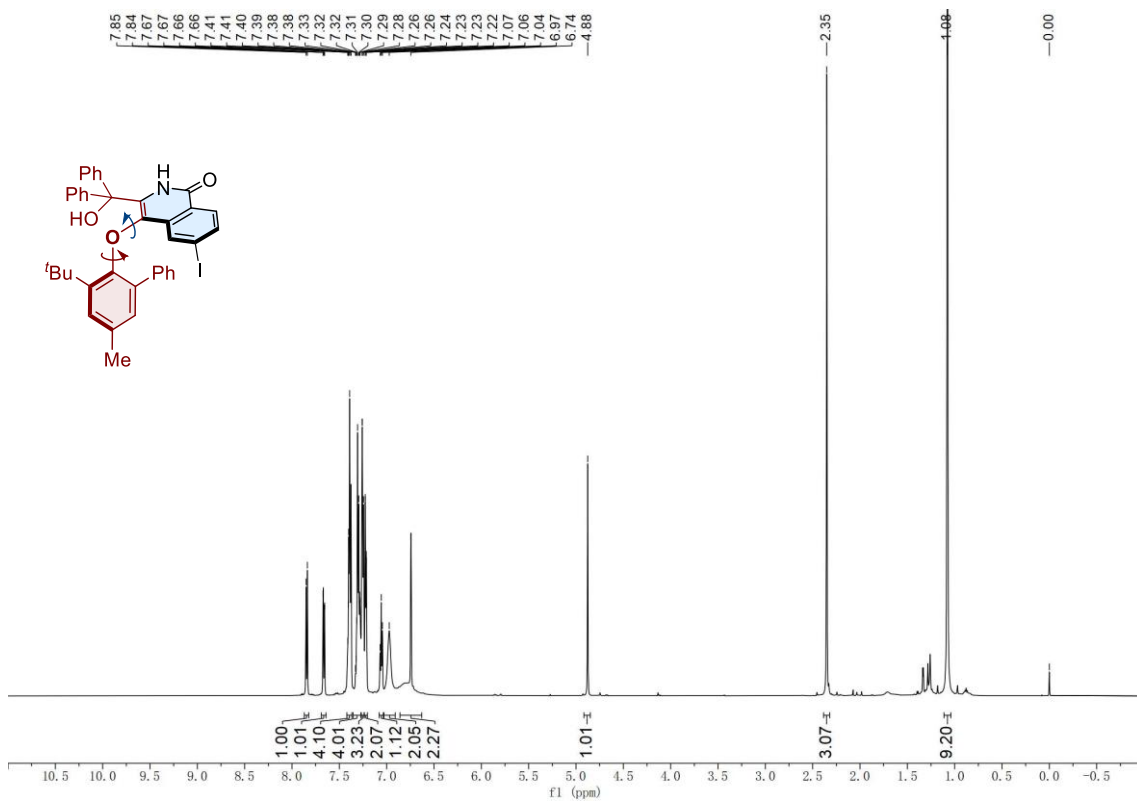

<sup>1</sup>H NMR spectrum of 3e (600 MHz, CDCl<sub>3</sub>)

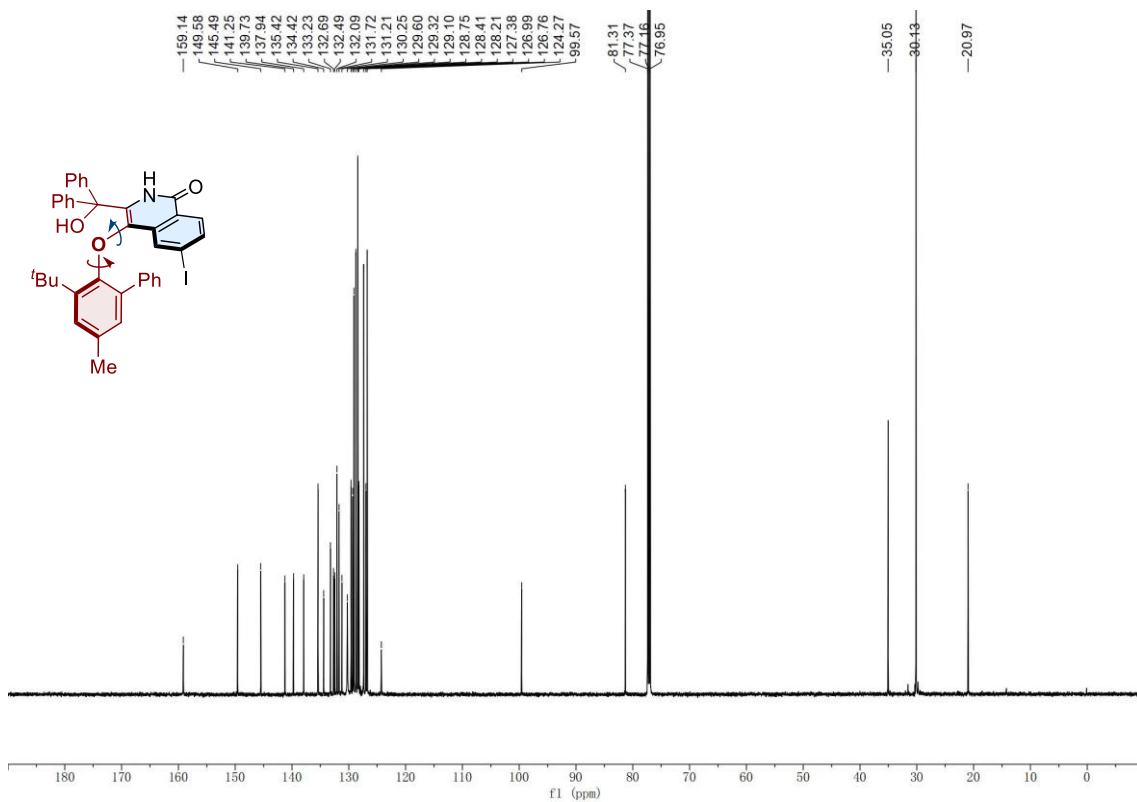

<sup>13</sup>C NMR spectrum of 3e (151 MHz, CDCl<sub>3</sub>)

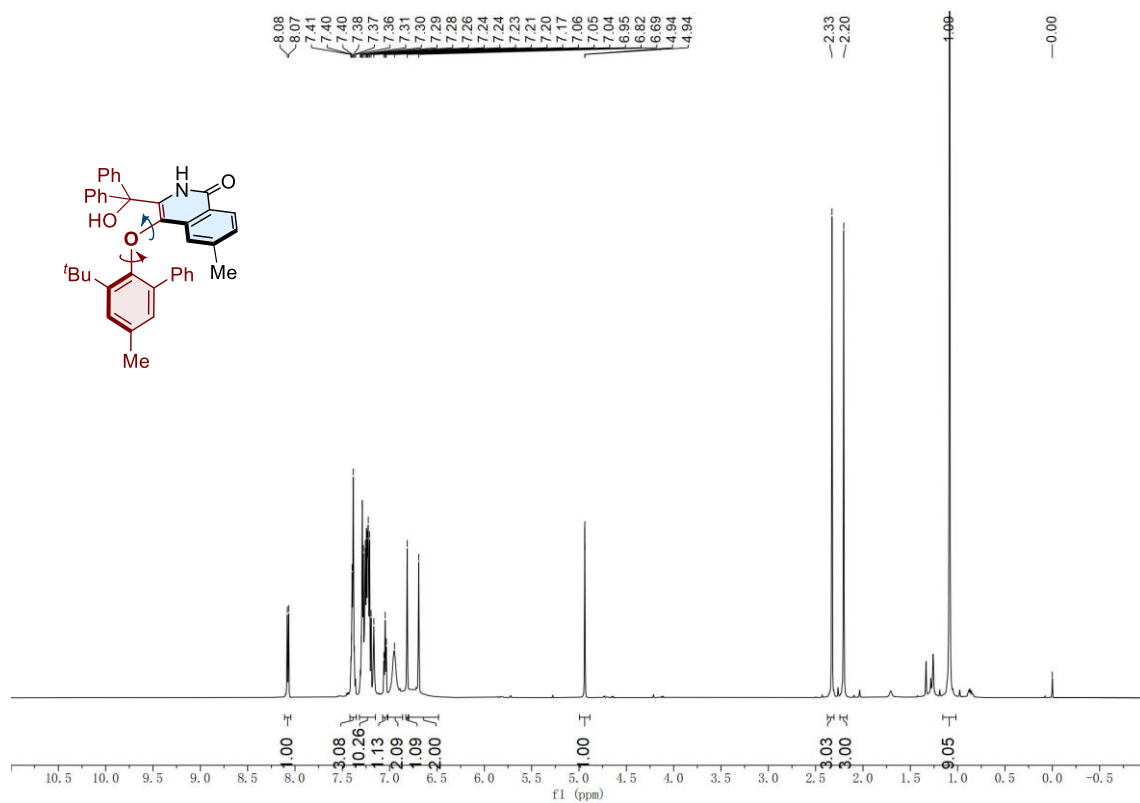

Figure S97. <sup>1</sup>H NMR spectrum of 3f (600 MHz, CDCl<sub>3</sub>)

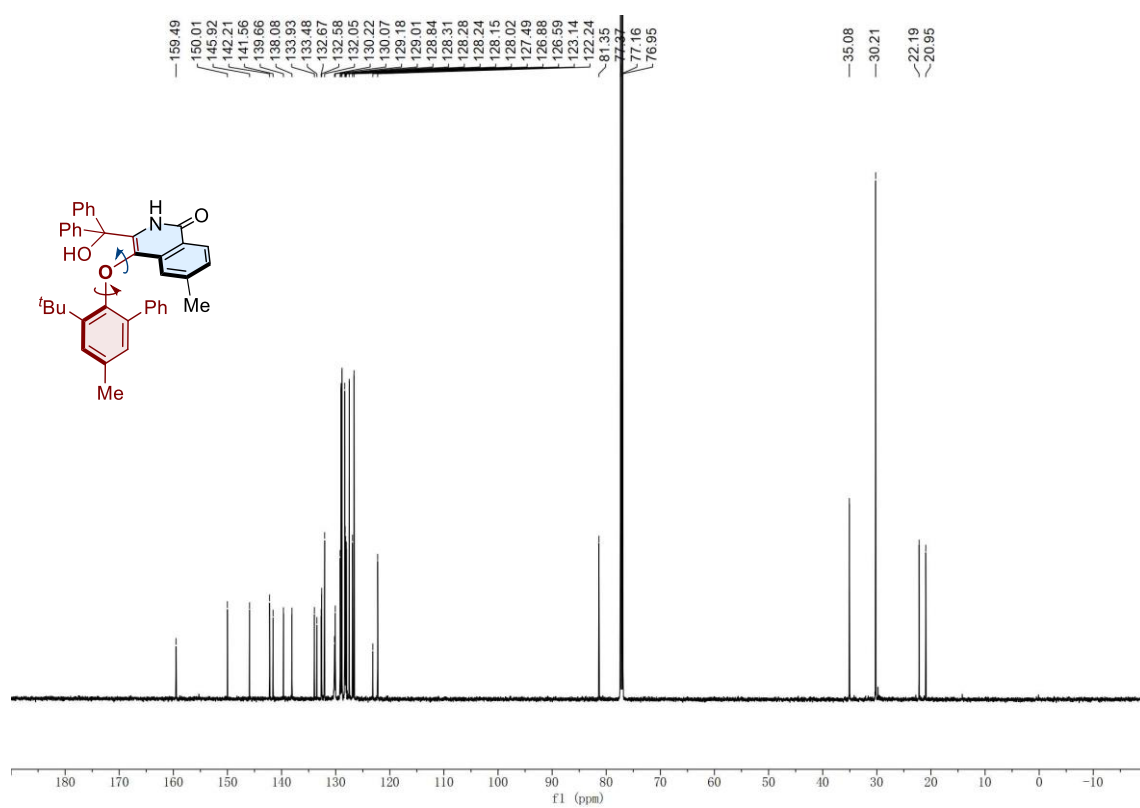

<sup>13</sup>C NMR spectrum of 3f (151 MHz, CDCl<sub>3</sub>)

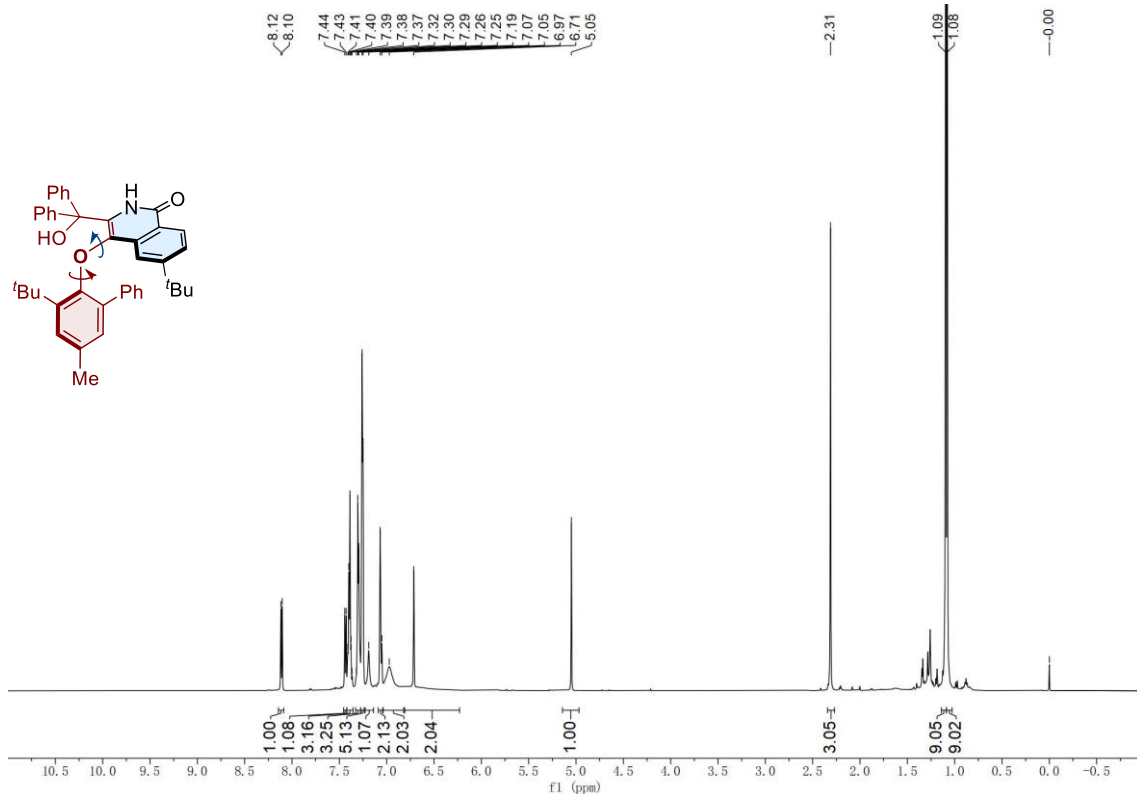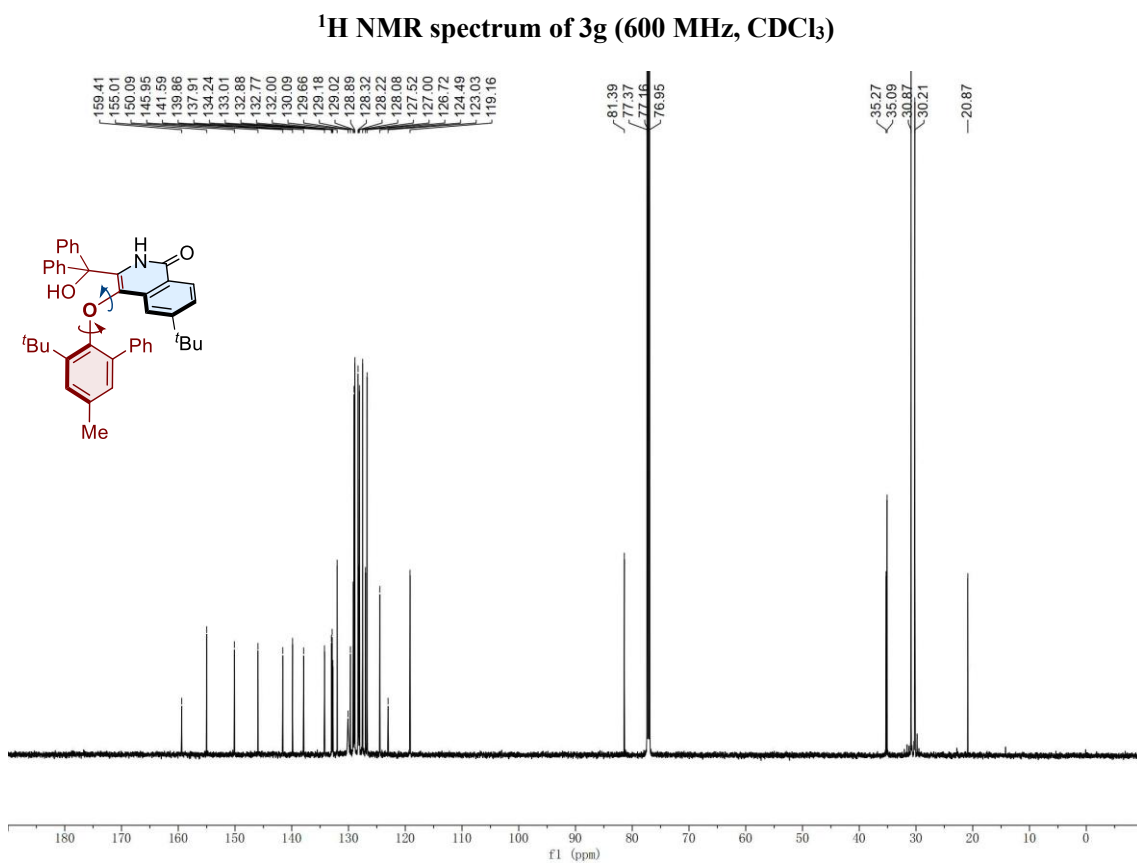

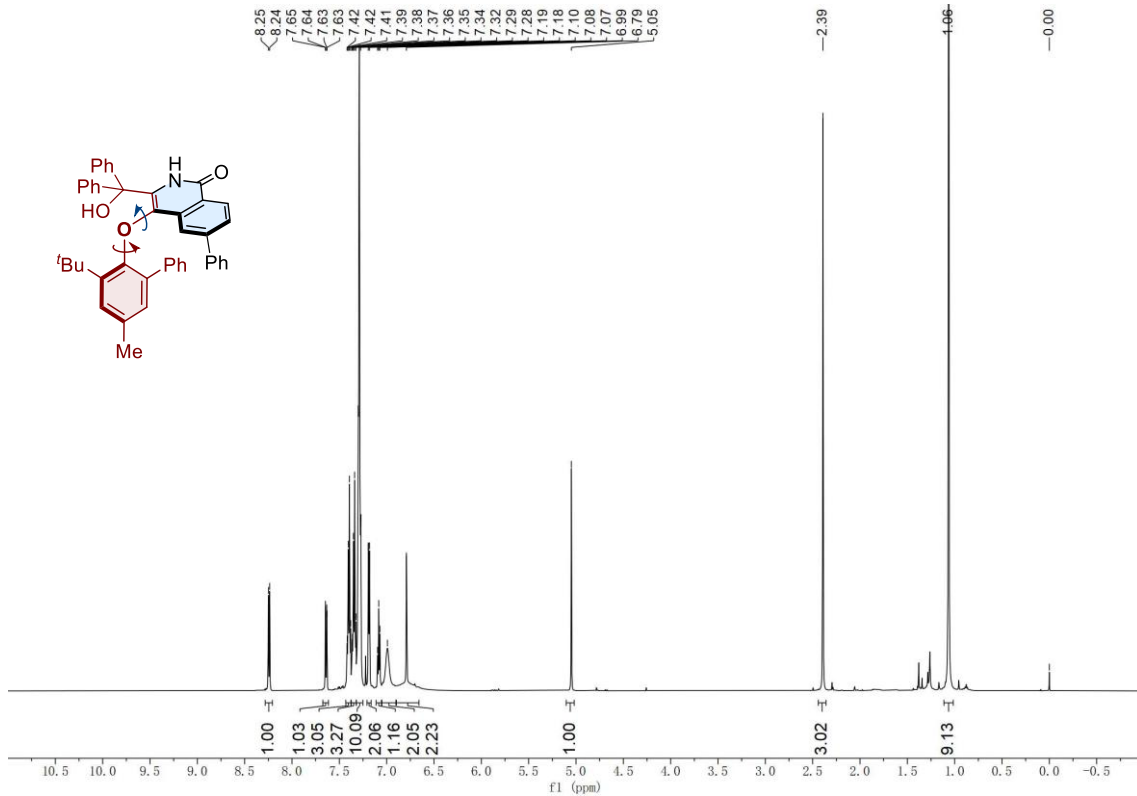

**<sup>1</sup>H NMR spectrum of 3h (600 MHz, CDCl<sub>3</sub>)**

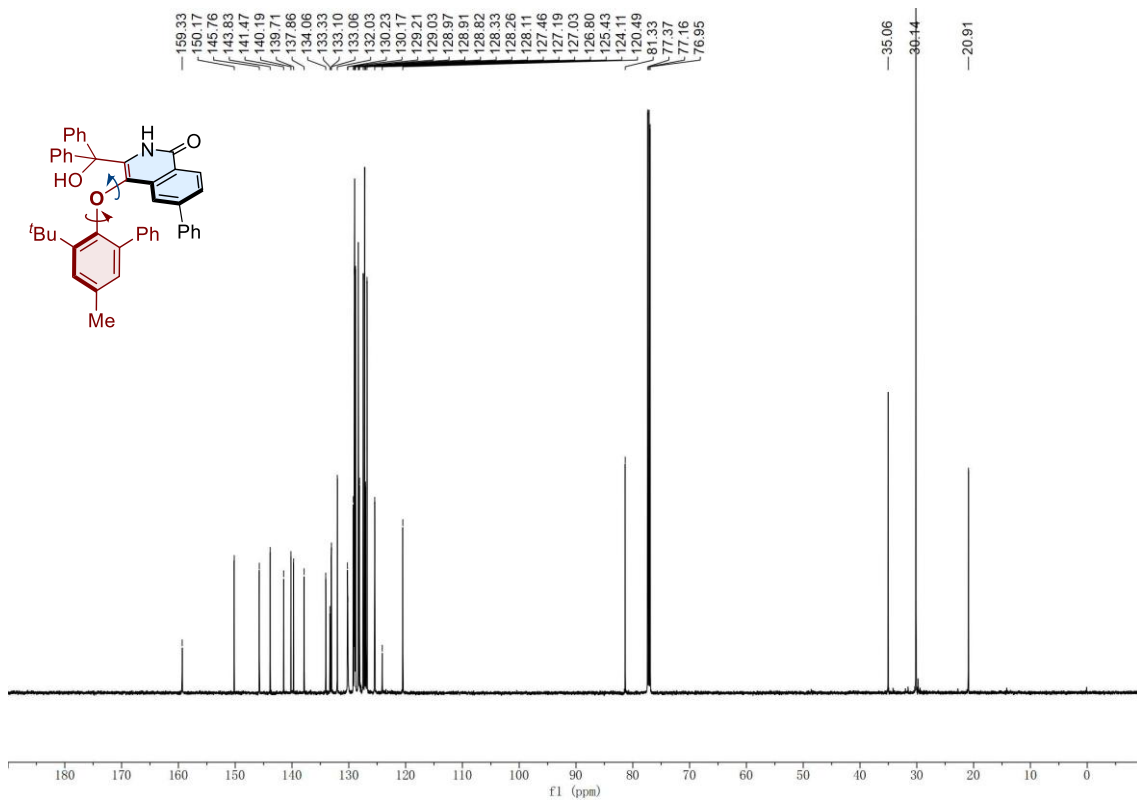

**<sup>13</sup>C NMR spectrum of 3h (151 MHz, CDCl<sub>3</sub>)**

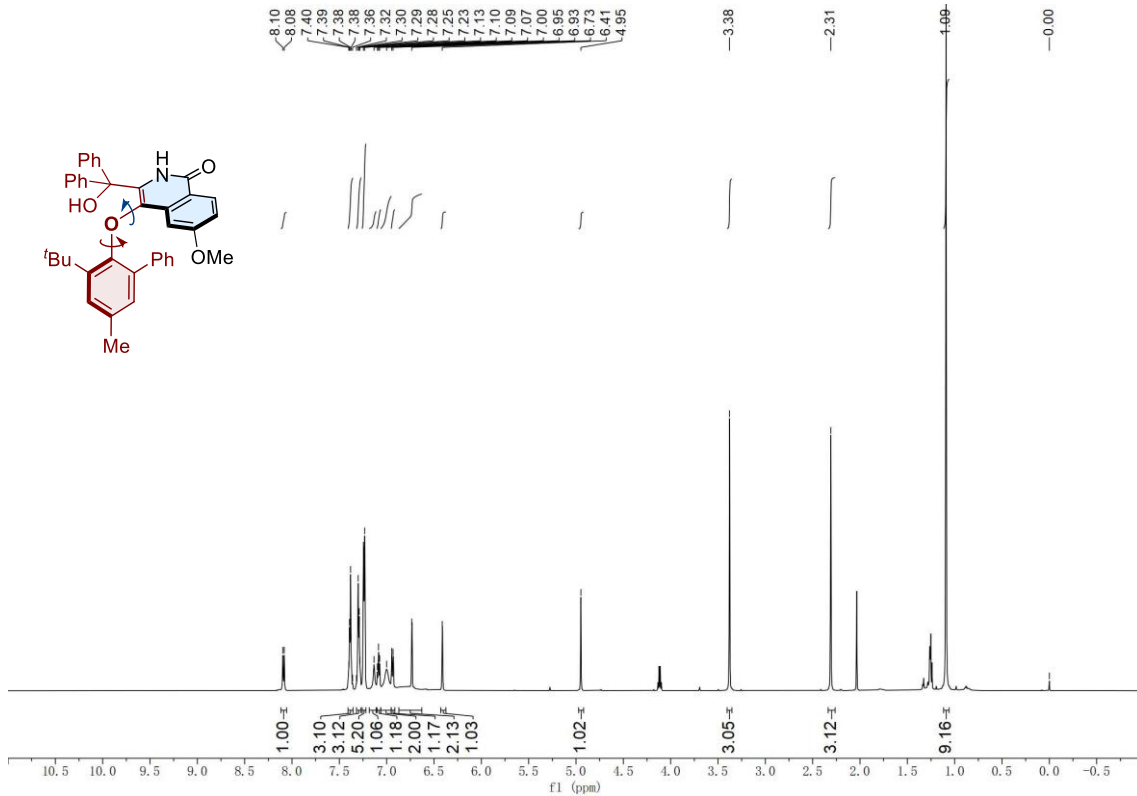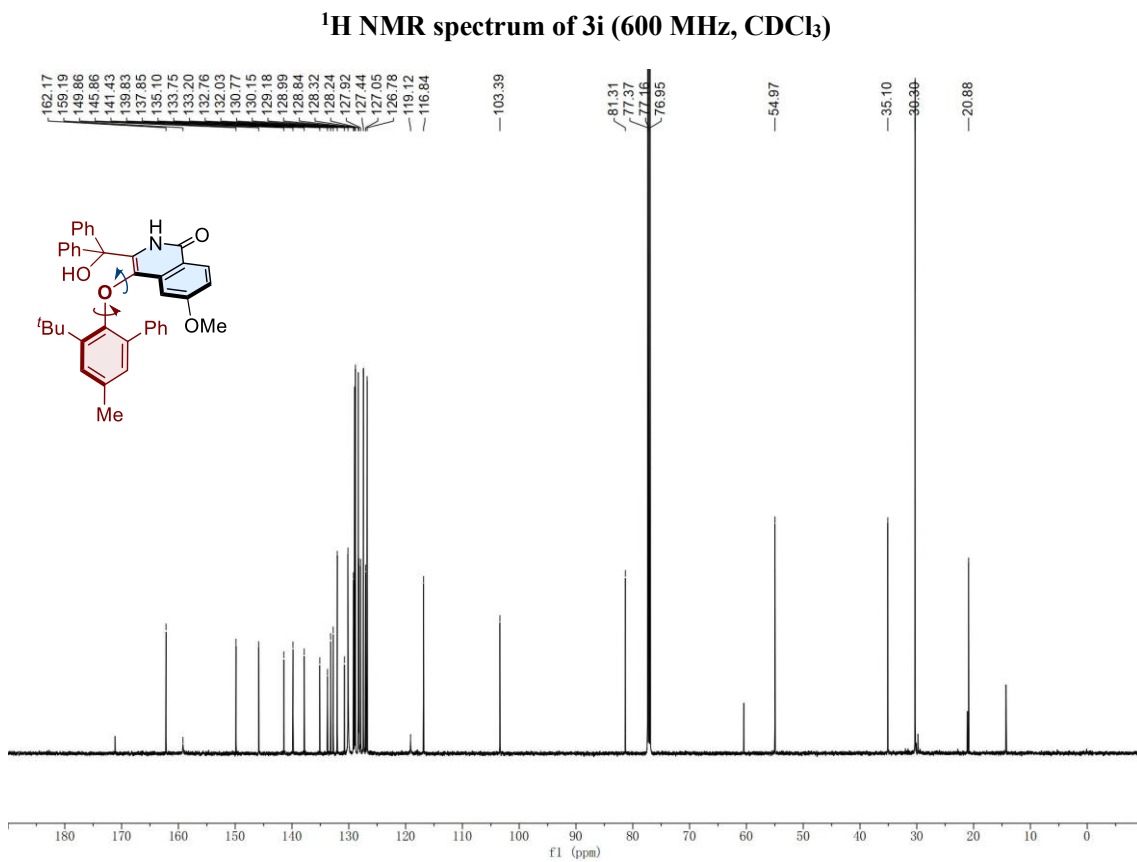

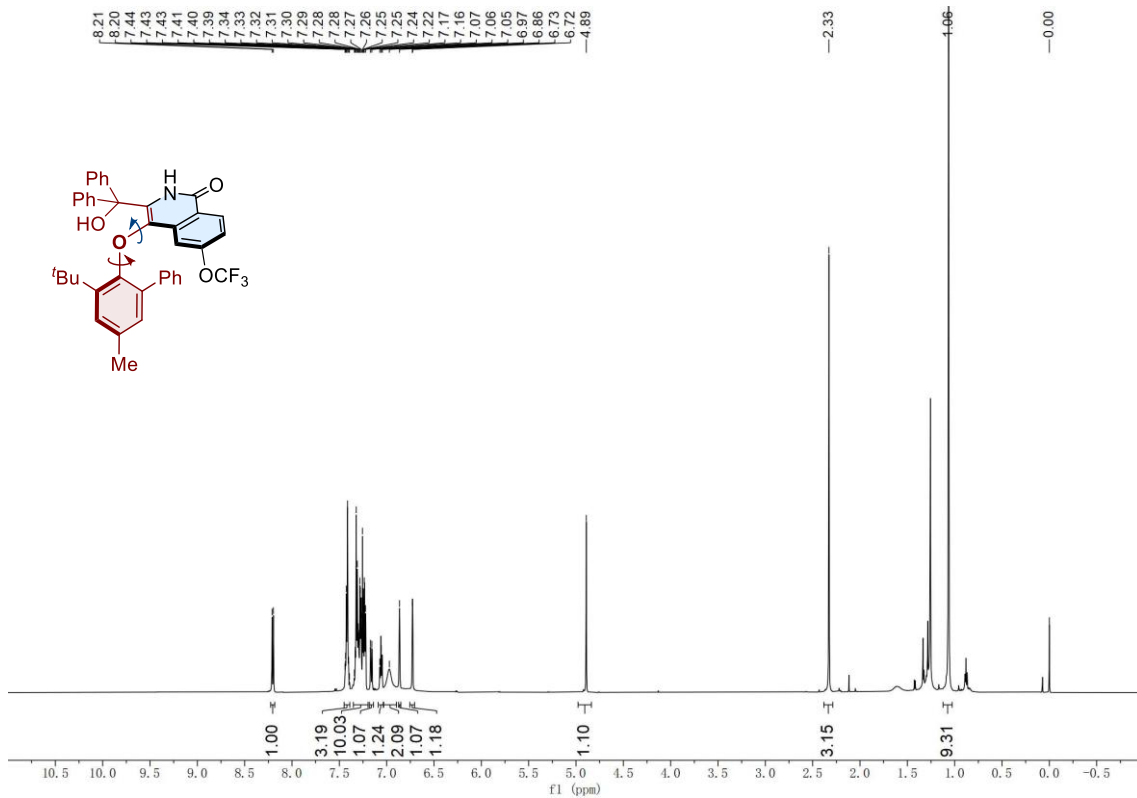

<sup>1</sup>H NMR spectrum of 3j (600 MHz, CDCl<sub>3</sub>)

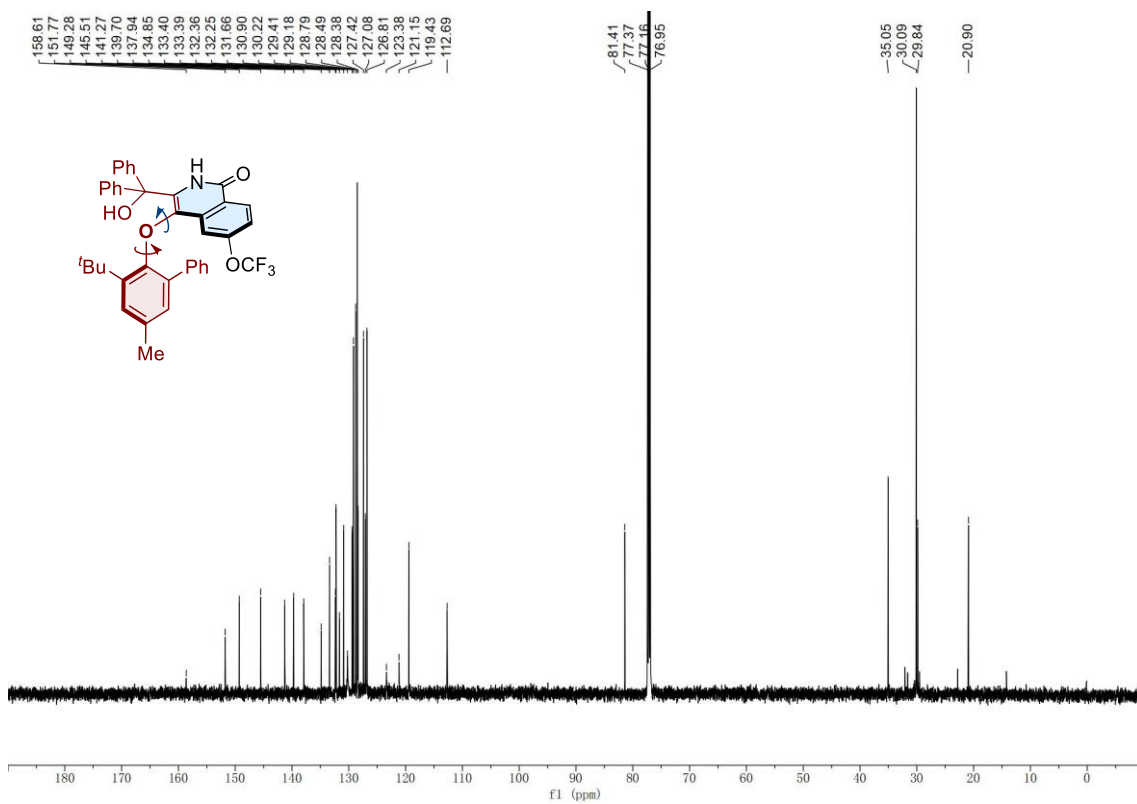

<sup>13</sup>C NMR spectrum of 3j (151 MHz, CDCl<sub>3</sub>)

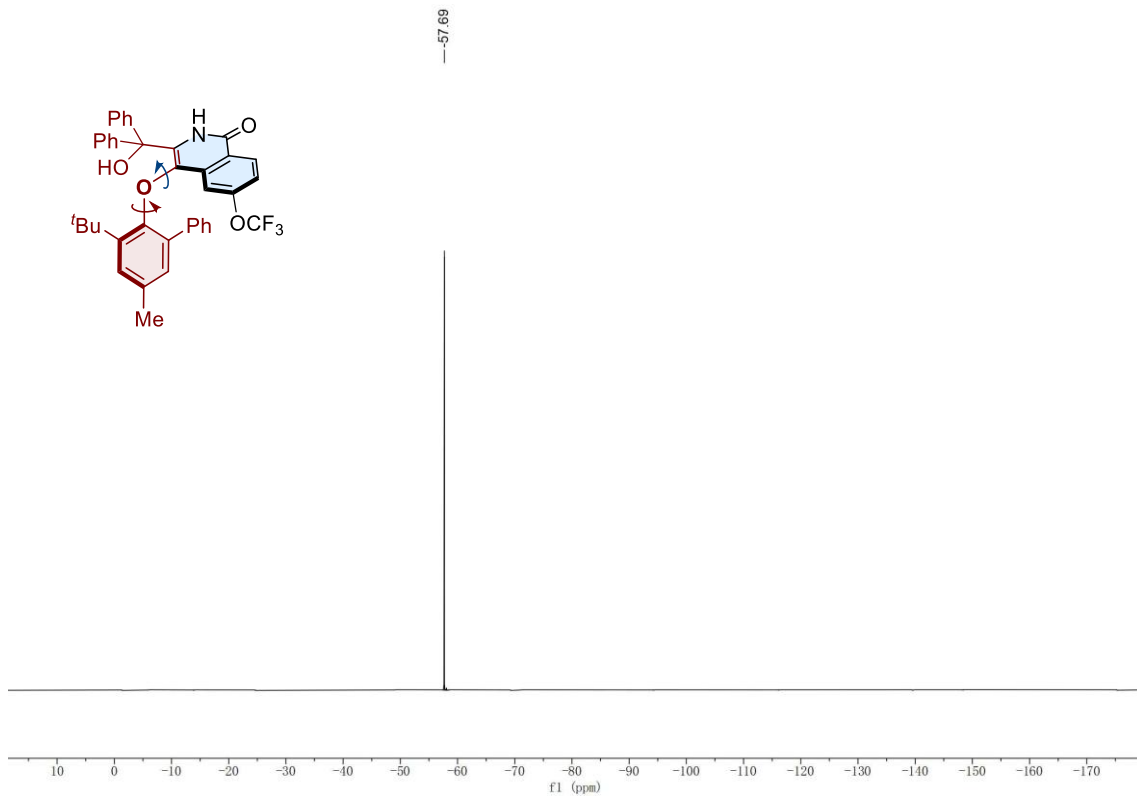

**<sup>19</sup>F NMR spectrum of 3j (565 MHz, CDCl<sub>3</sub>)**

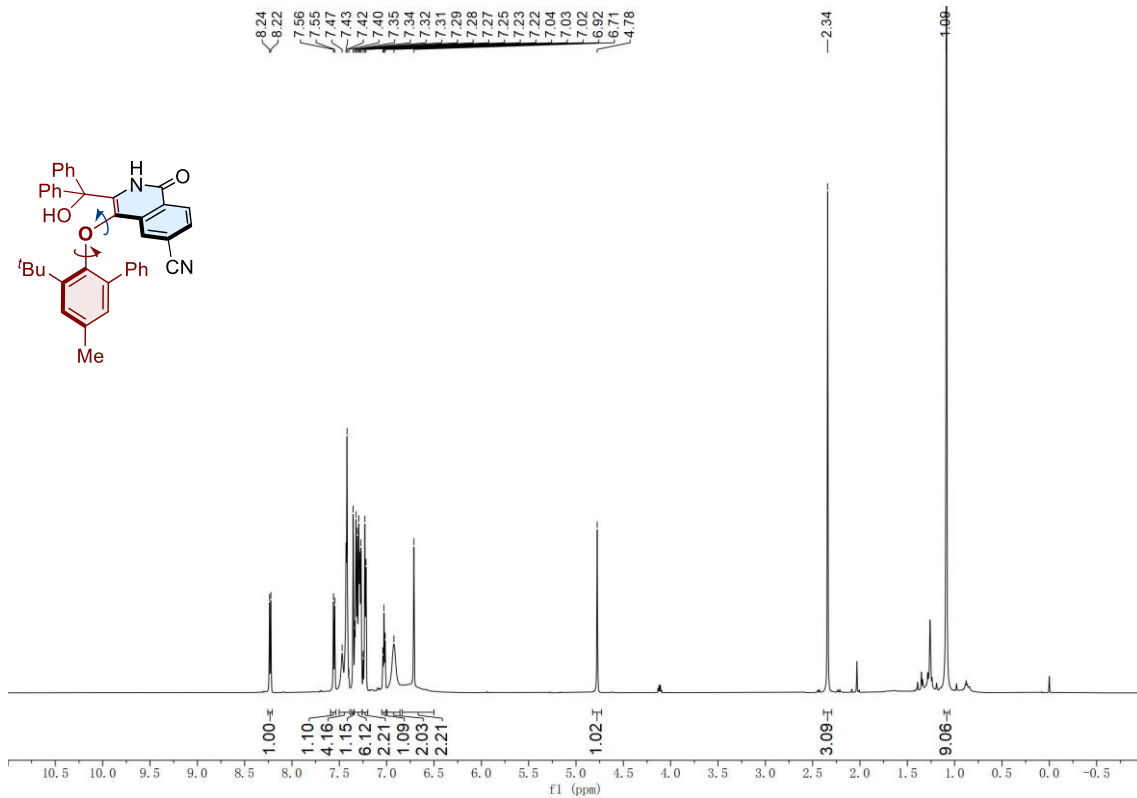

**<sup>1</sup>H NMR spectrum of 3k (600 MHz, CDCl<sub>3</sub>)**

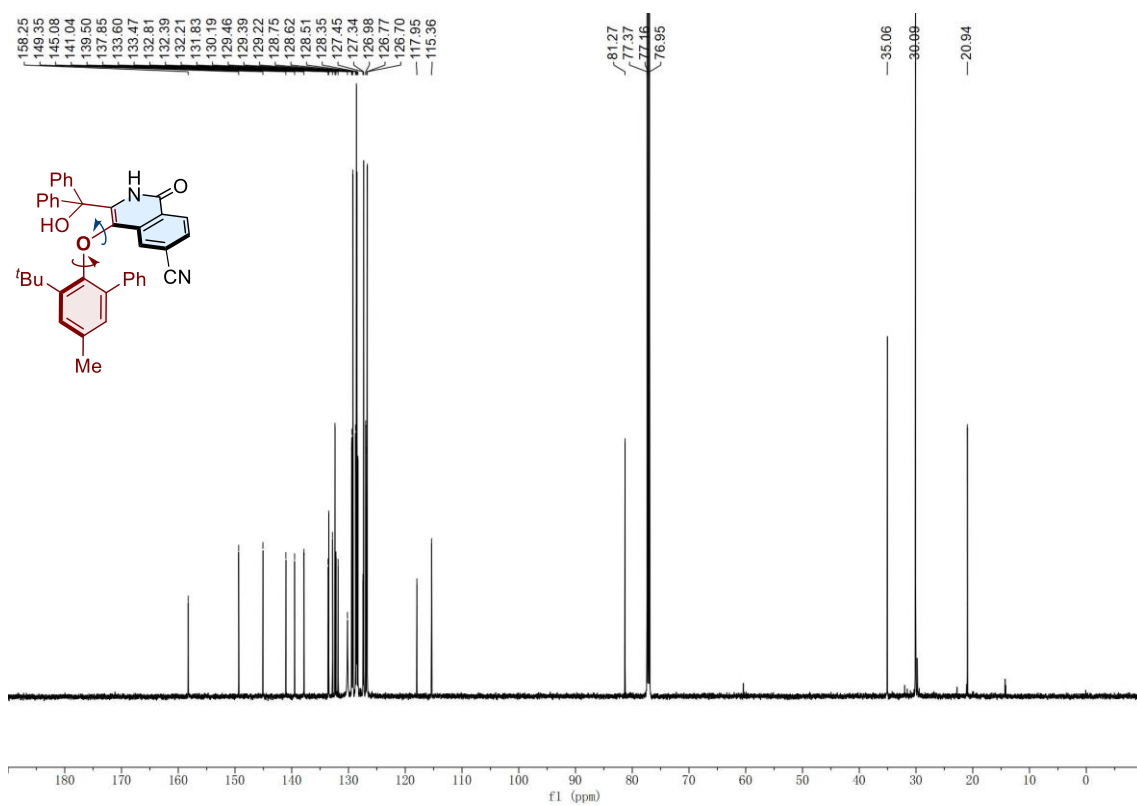

**<sup>13</sup>C NMR spectrum of 3k (151 MHz, CDCl<sub>3</sub>)**



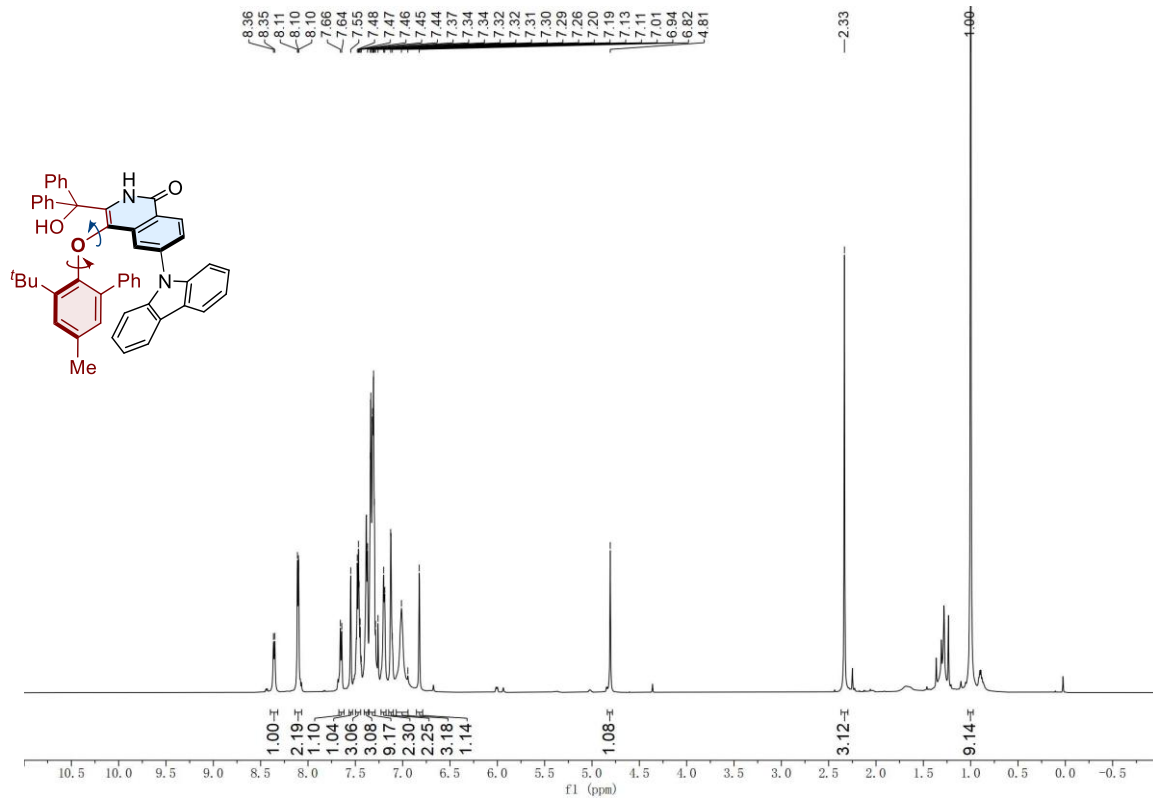

**<sup>1</sup>H NMR spectrum of 3m (600 MHz, CDCl<sub>3</sub>)**

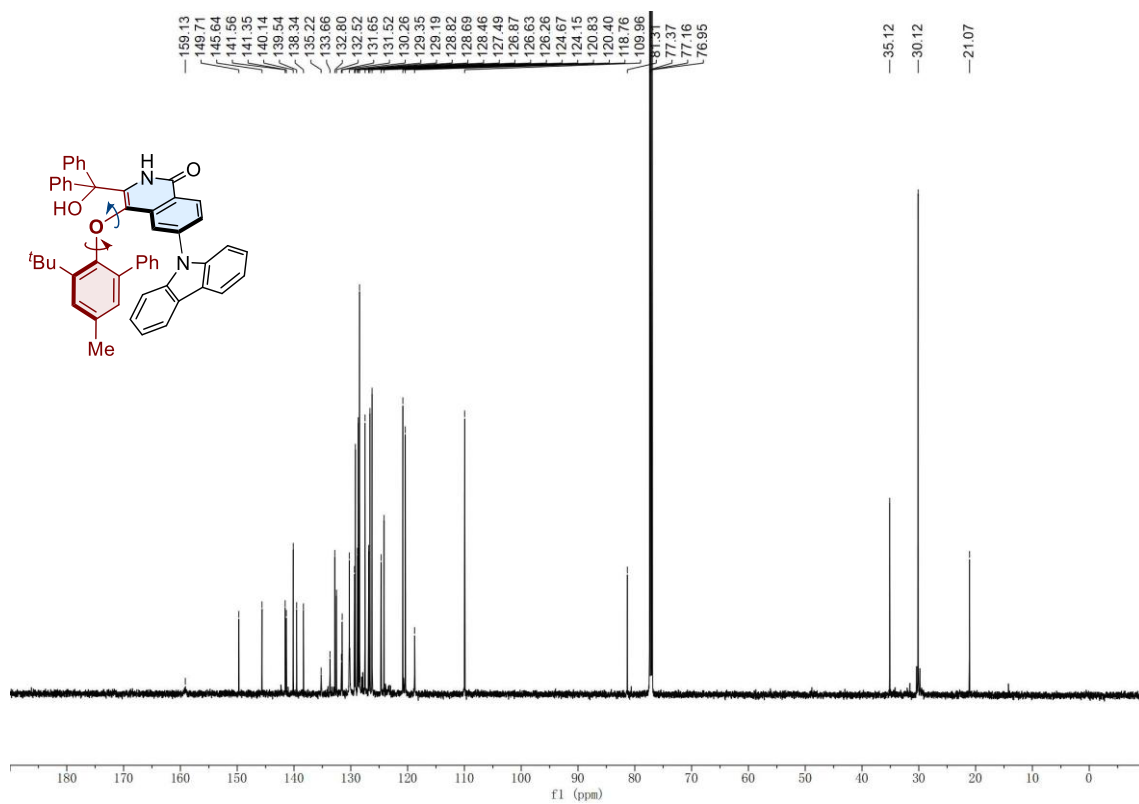

**<sup>13</sup>C NMR spectrum of 3m (151 MHz, CDCl<sub>3</sub>)**

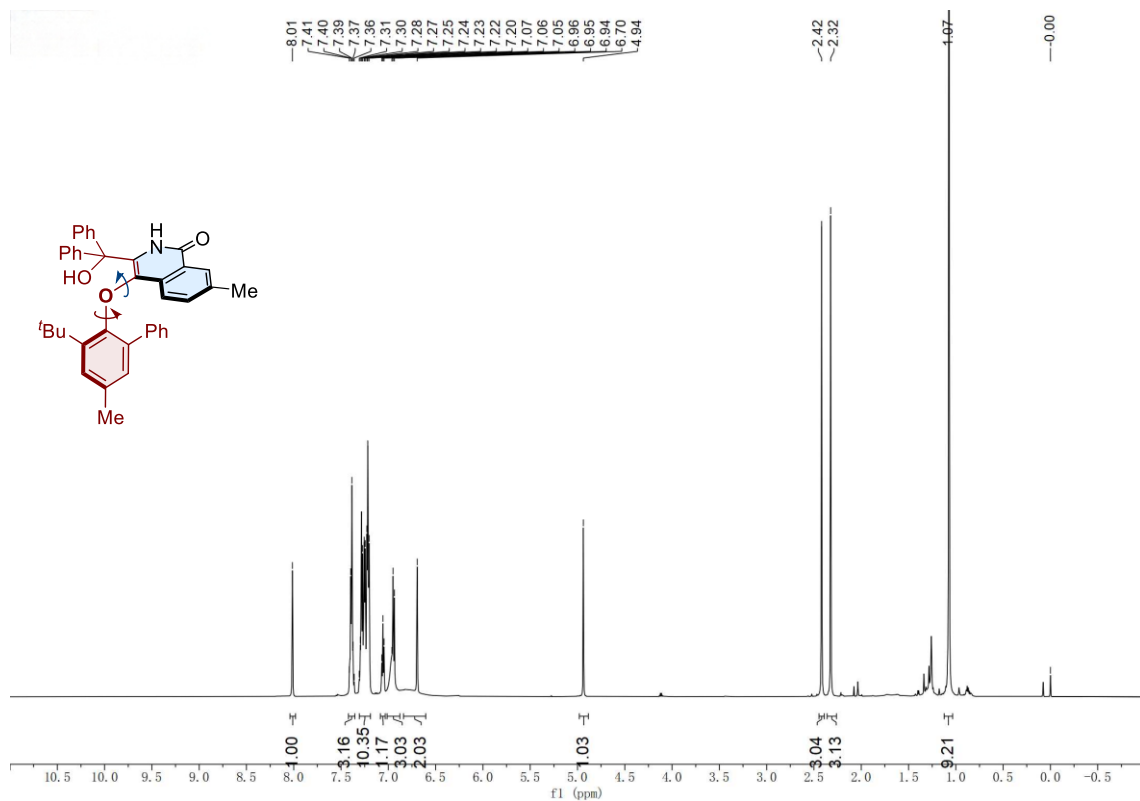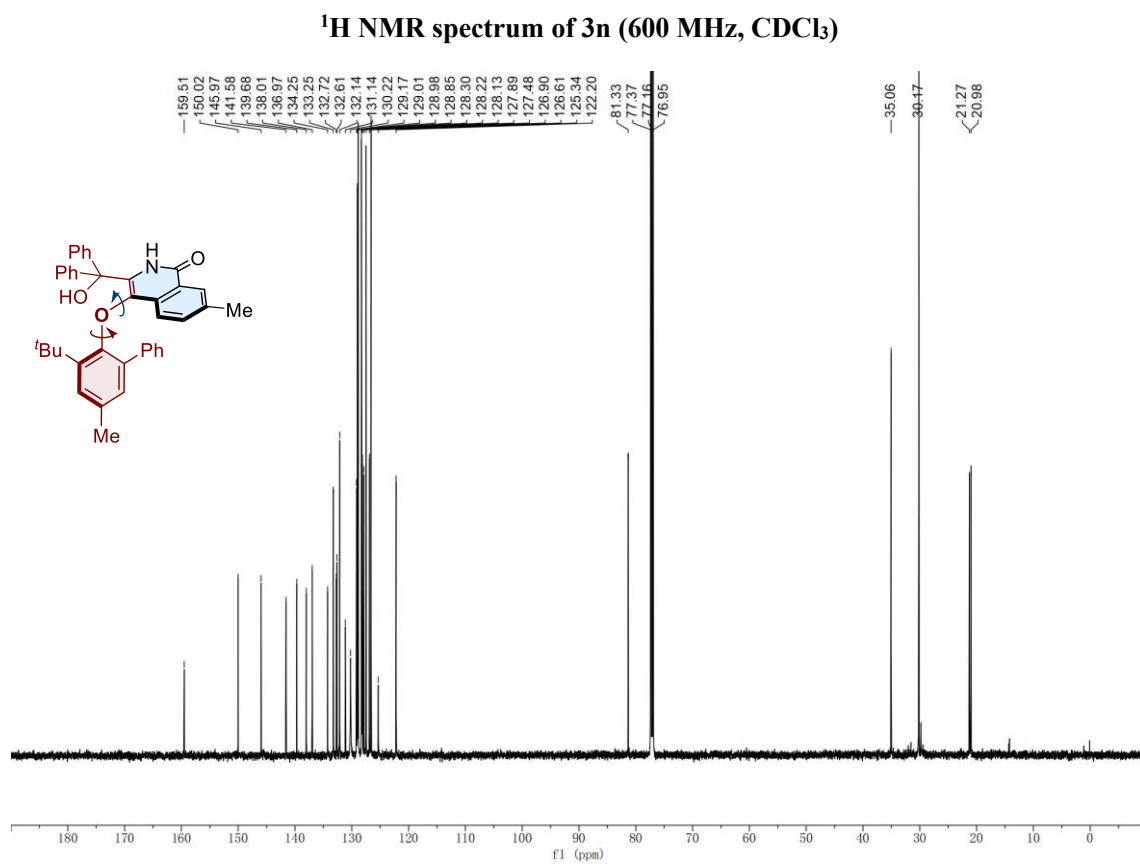

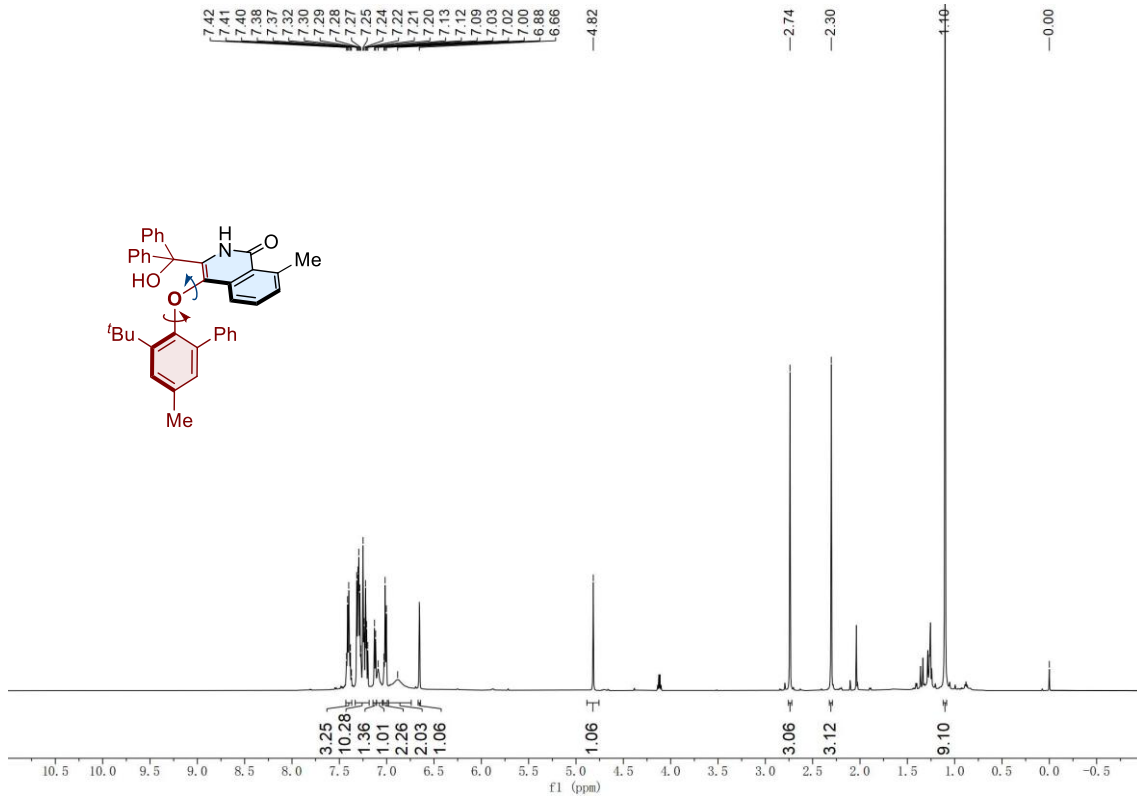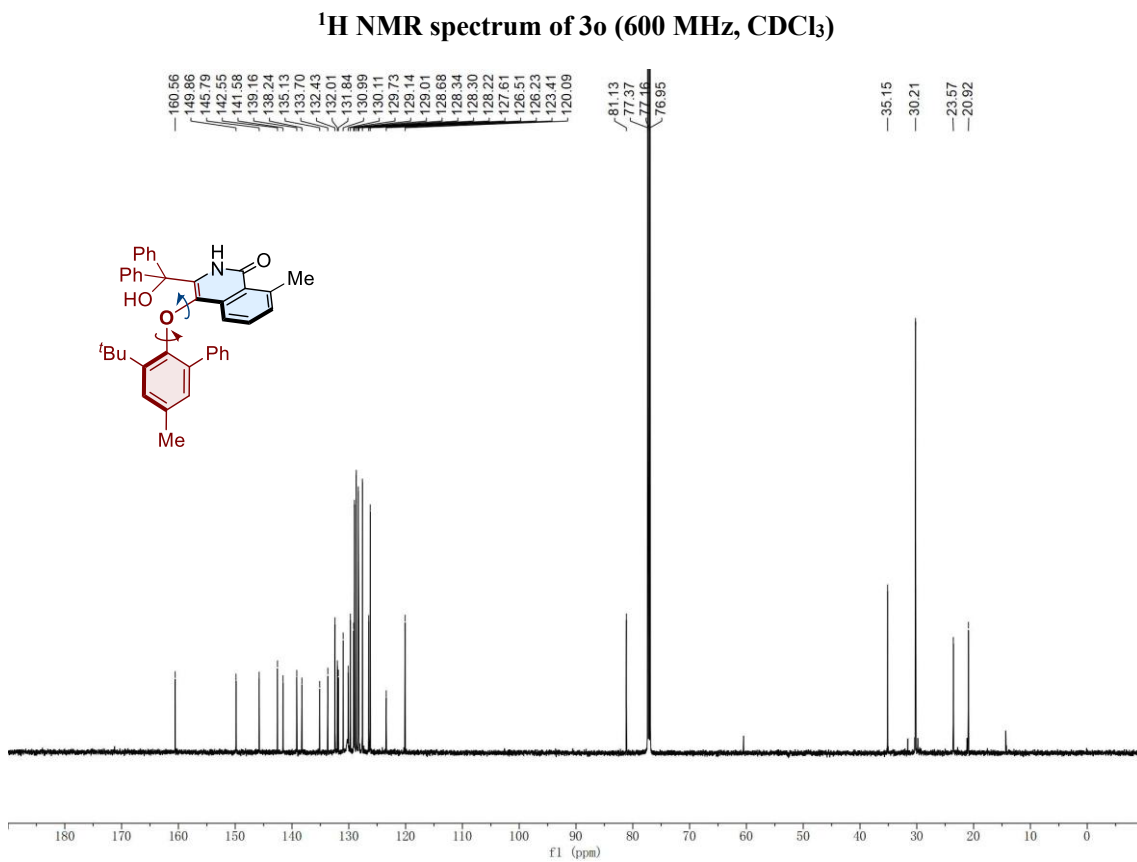

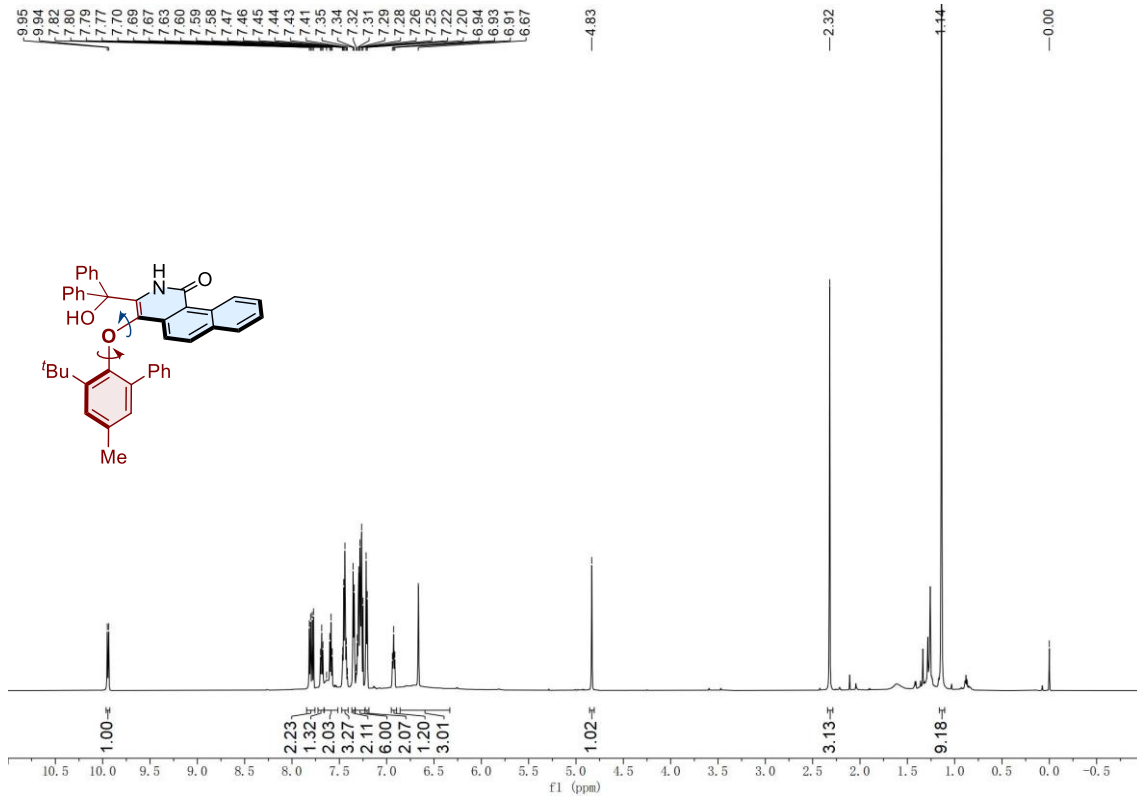

<sup>1</sup>H NMR spectrum of 3p (600 MHz, CDCl<sub>3</sub>)

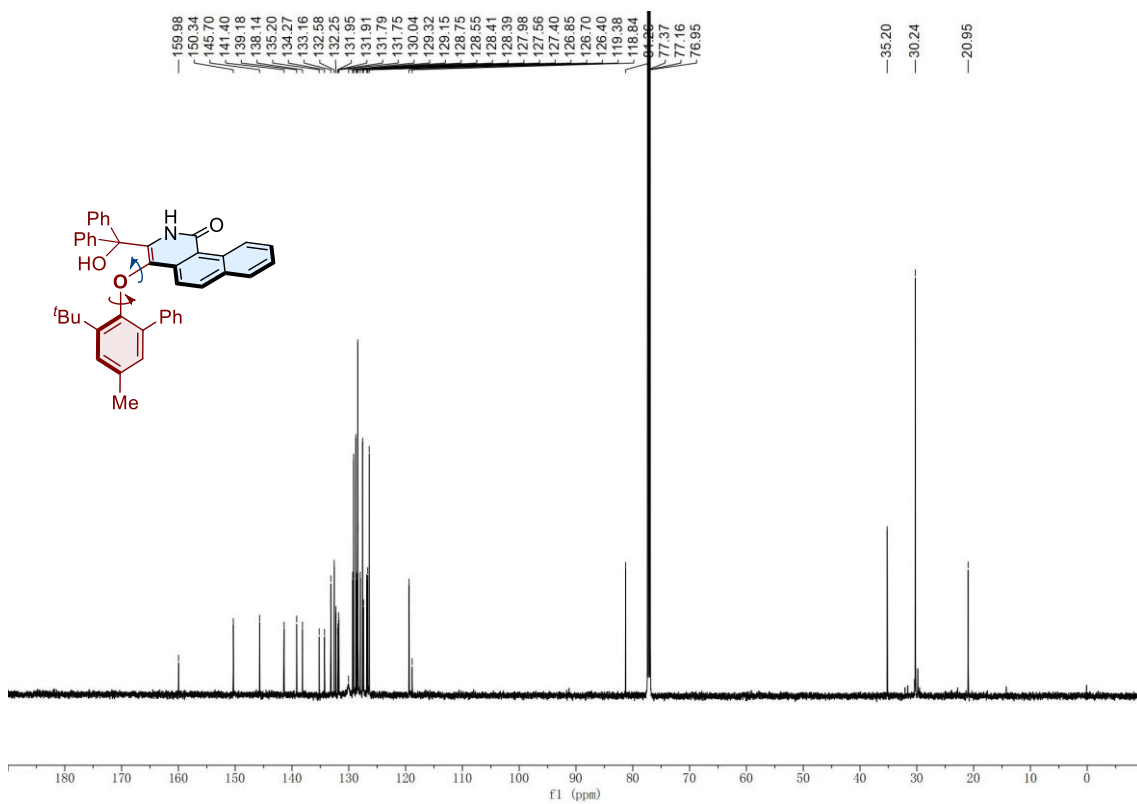

<sup>13</sup>C NMR spectrum of 3p (151 MHz, CDCl<sub>3</sub>)

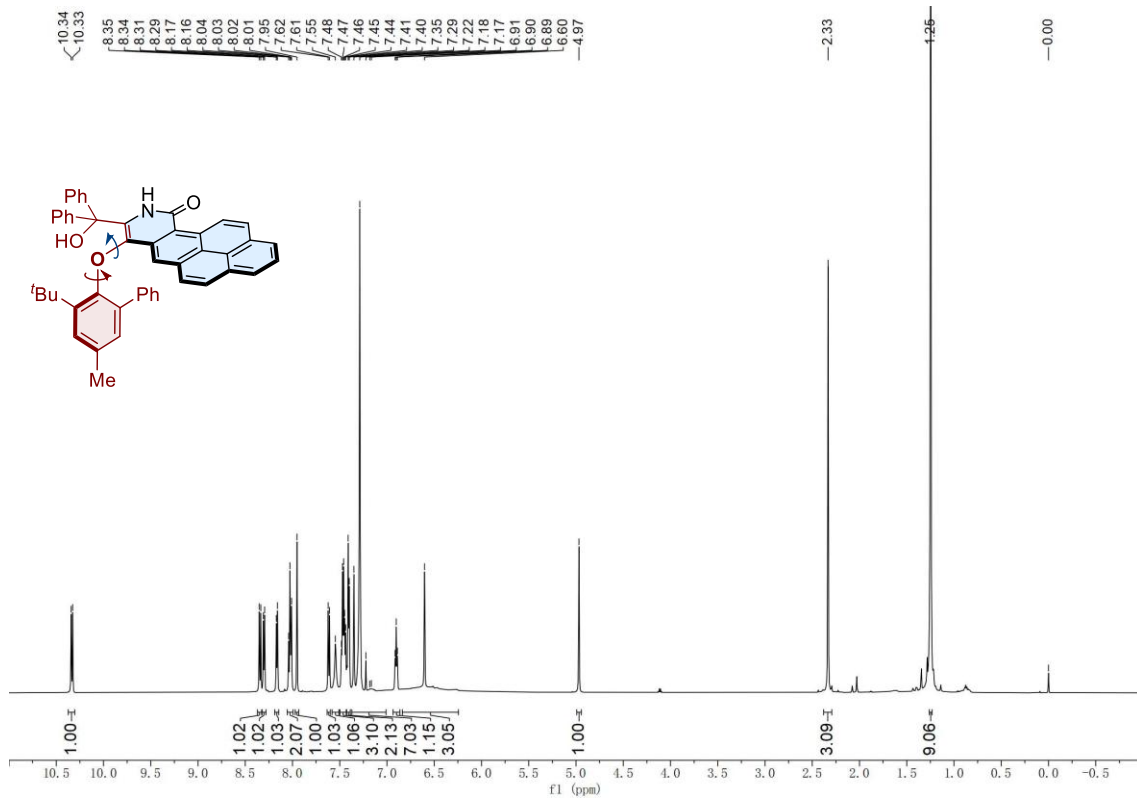

**<sup>1</sup>H NMR spectrum of 3q (600 MHz, CDCl<sub>3</sub>)**

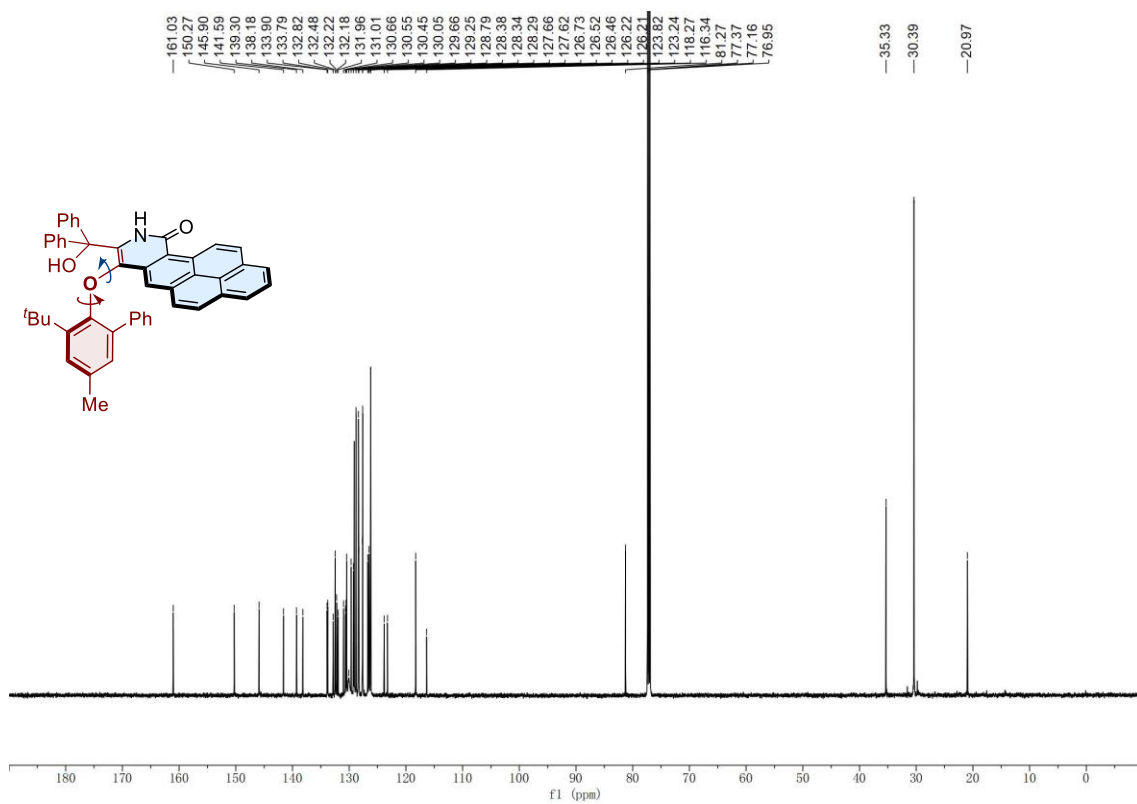

**<sup>13</sup>C NMR spectrum of 3q (151 MHz, CDCl<sub>3</sub>)**

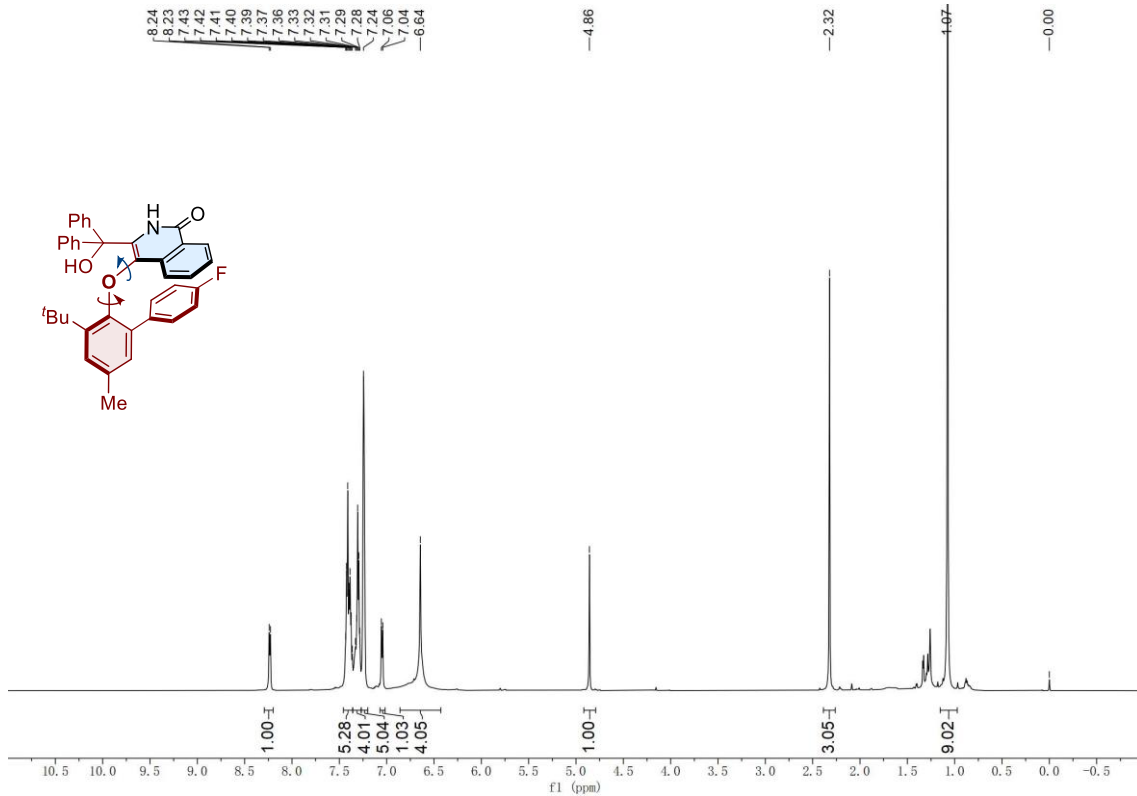

<sup>1</sup>H NMR spectrum of 3r (600 MHz, CDCl<sub>3</sub>)

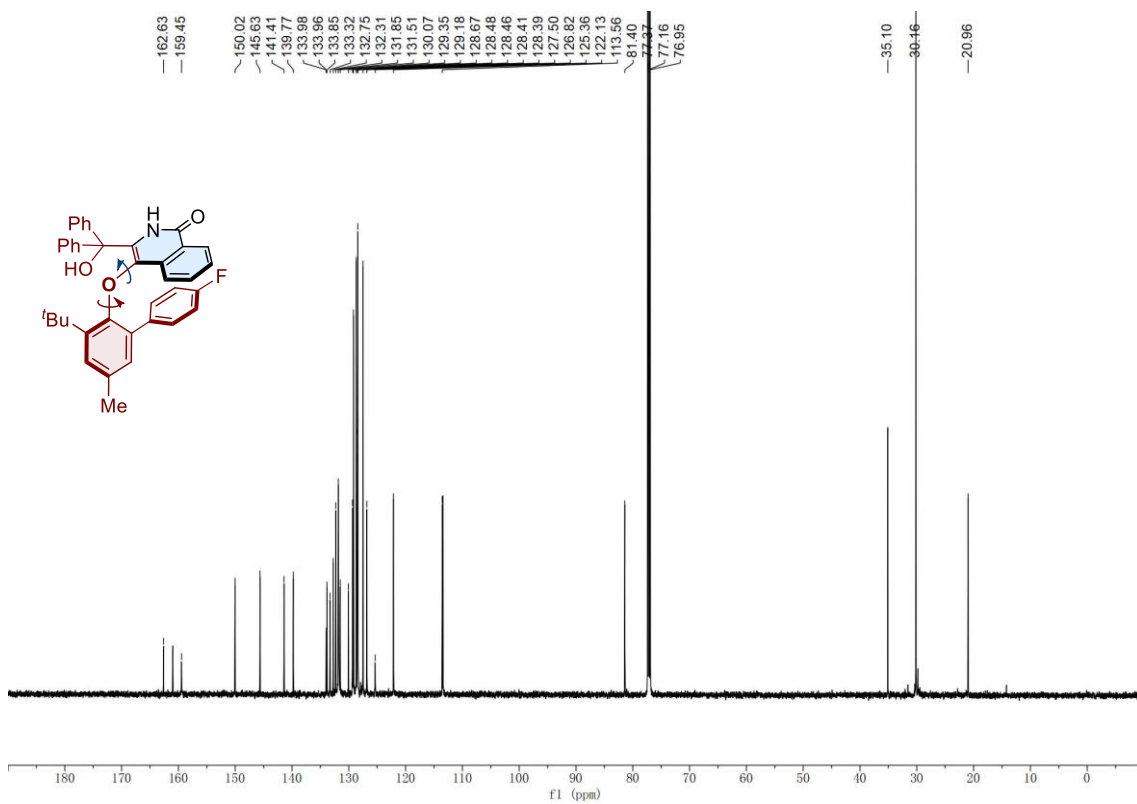

<sup>13</sup>C NMR spectrum of 3r (151 MHz, CDCl<sub>3</sub>)

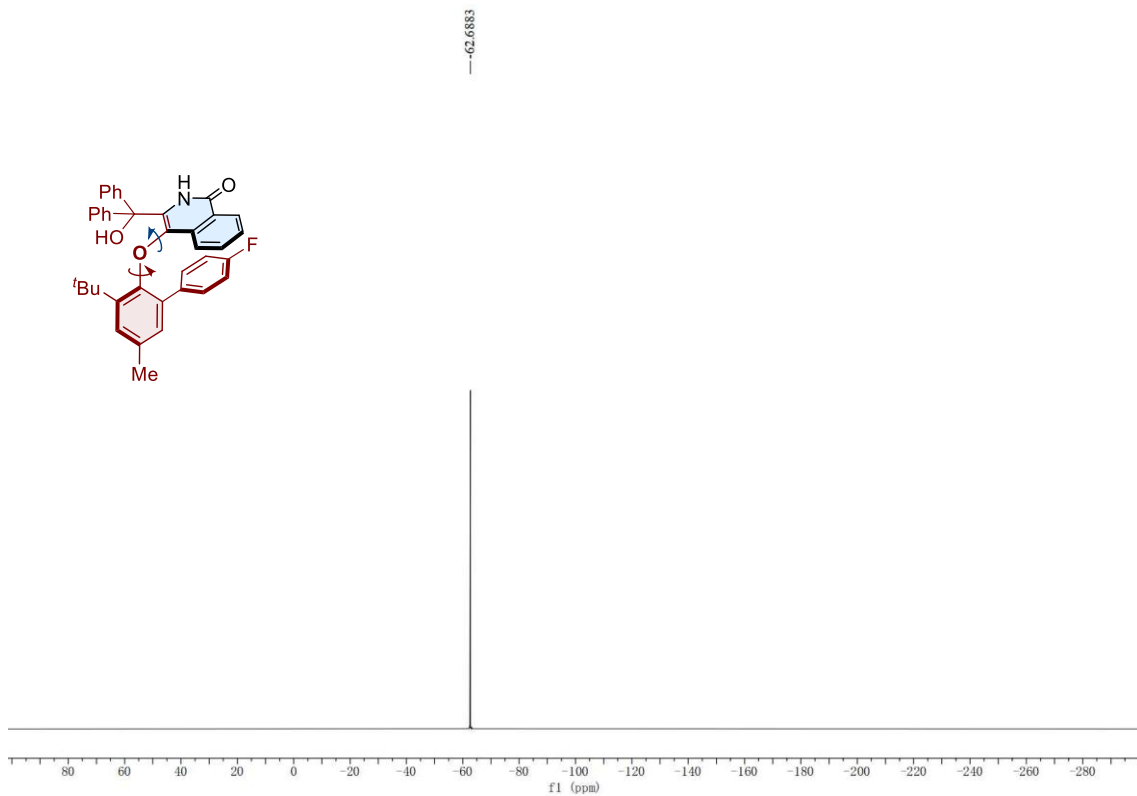



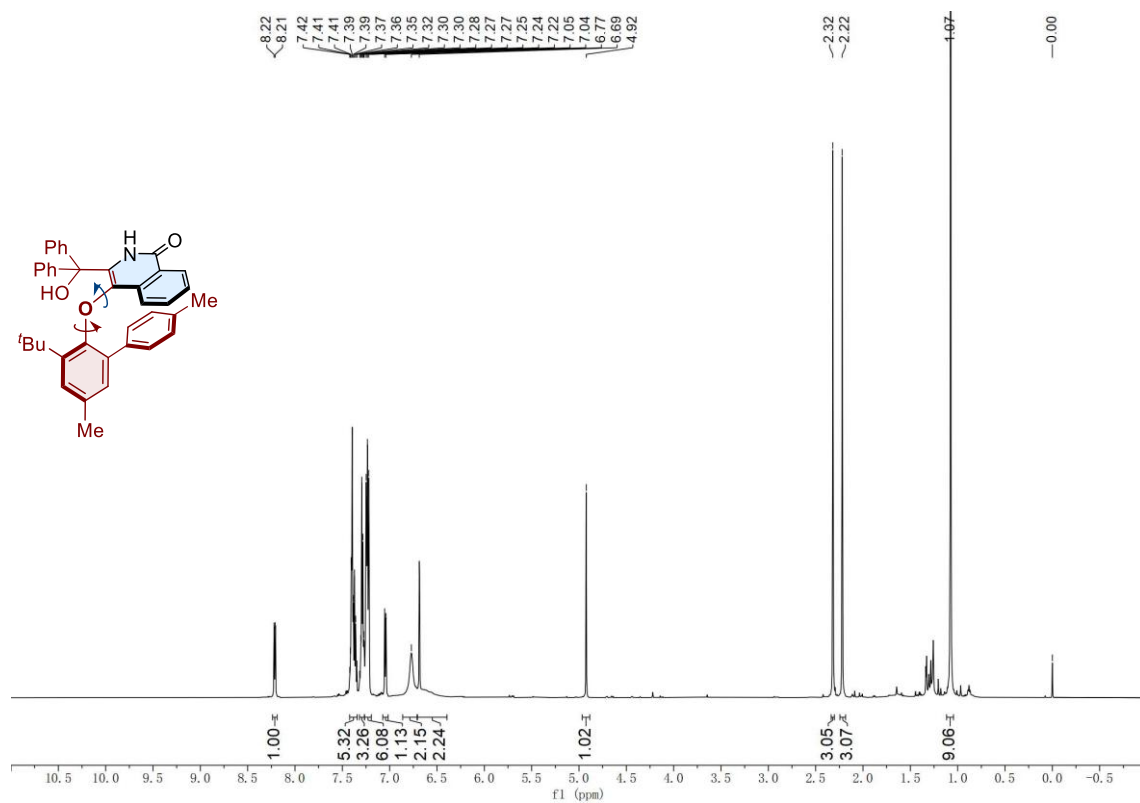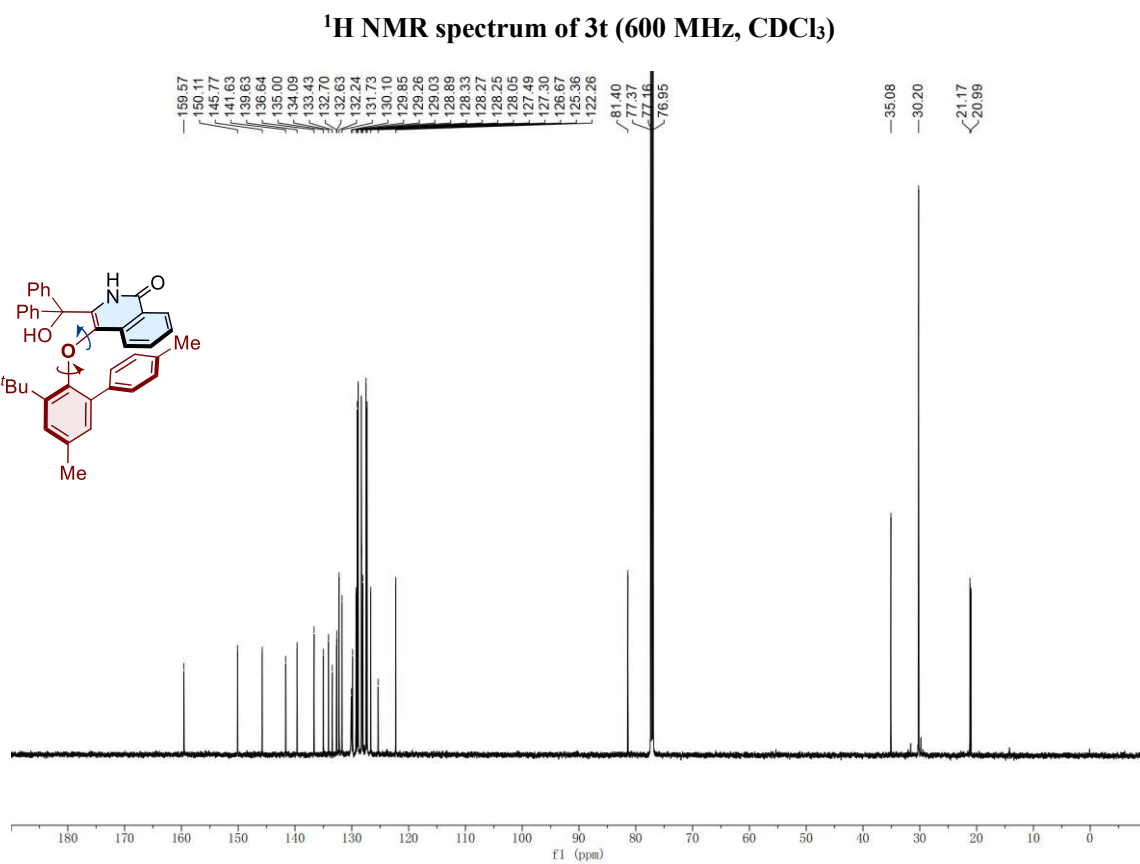

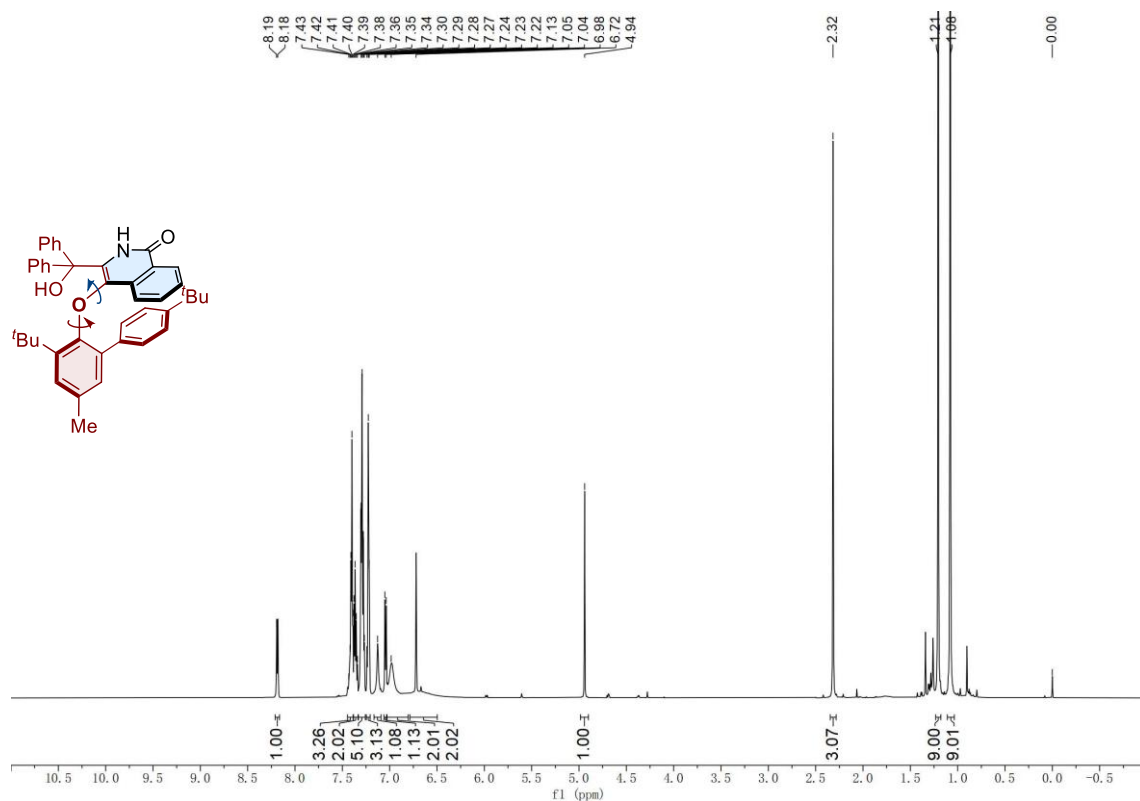

**<sup>1</sup>H NMR spectrum of 3u (600 MHz, CDCl<sub>3</sub>)**

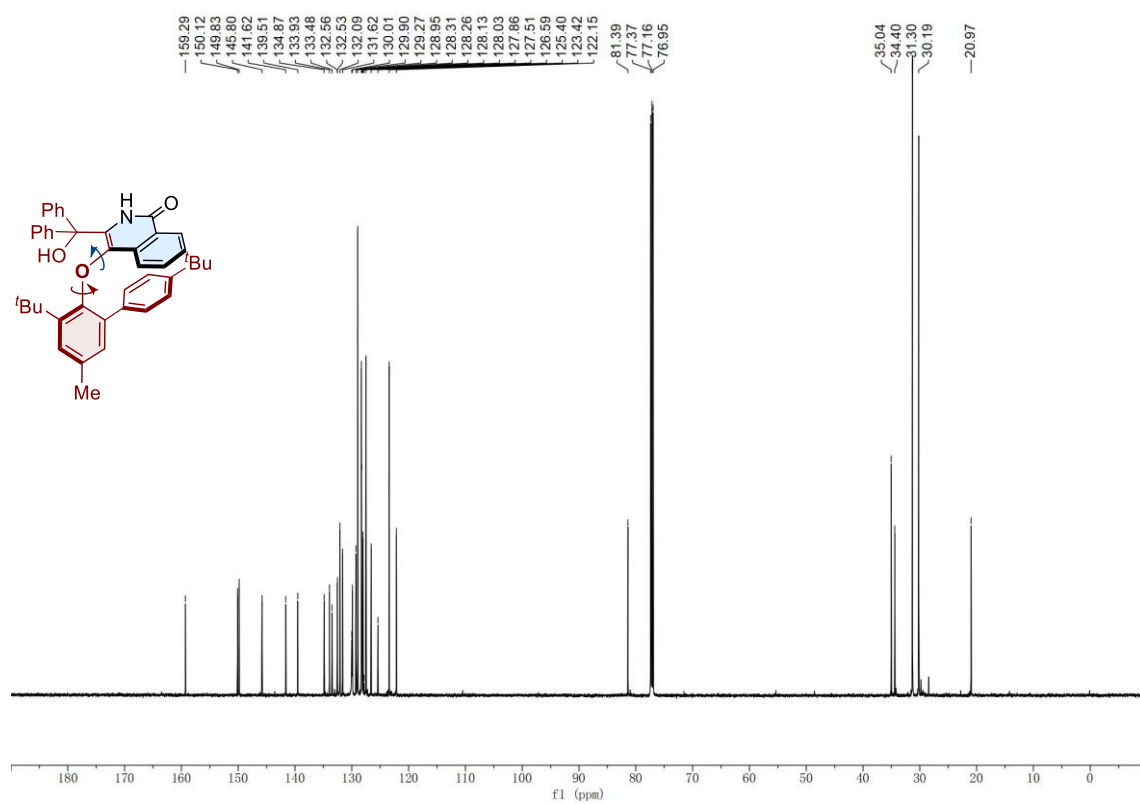

**<sup>13</sup>C NMR spectrum of 3u (151 MHz, CDCl<sub>3</sub>)**

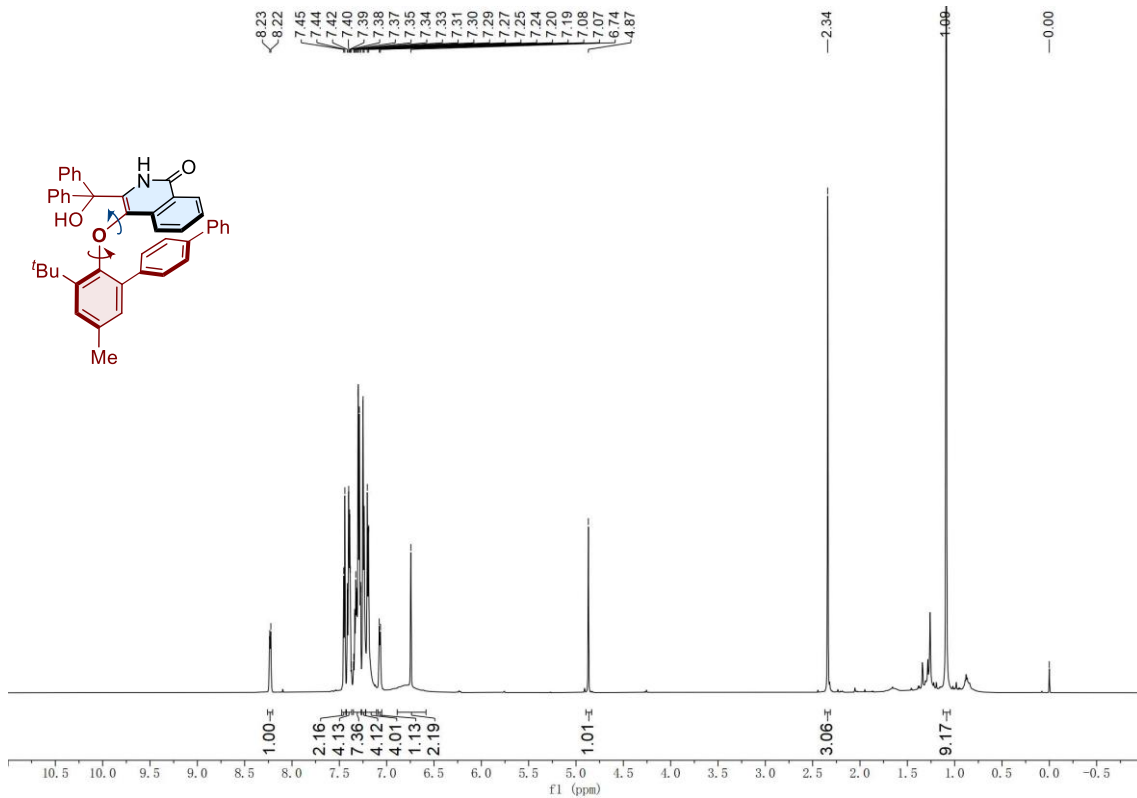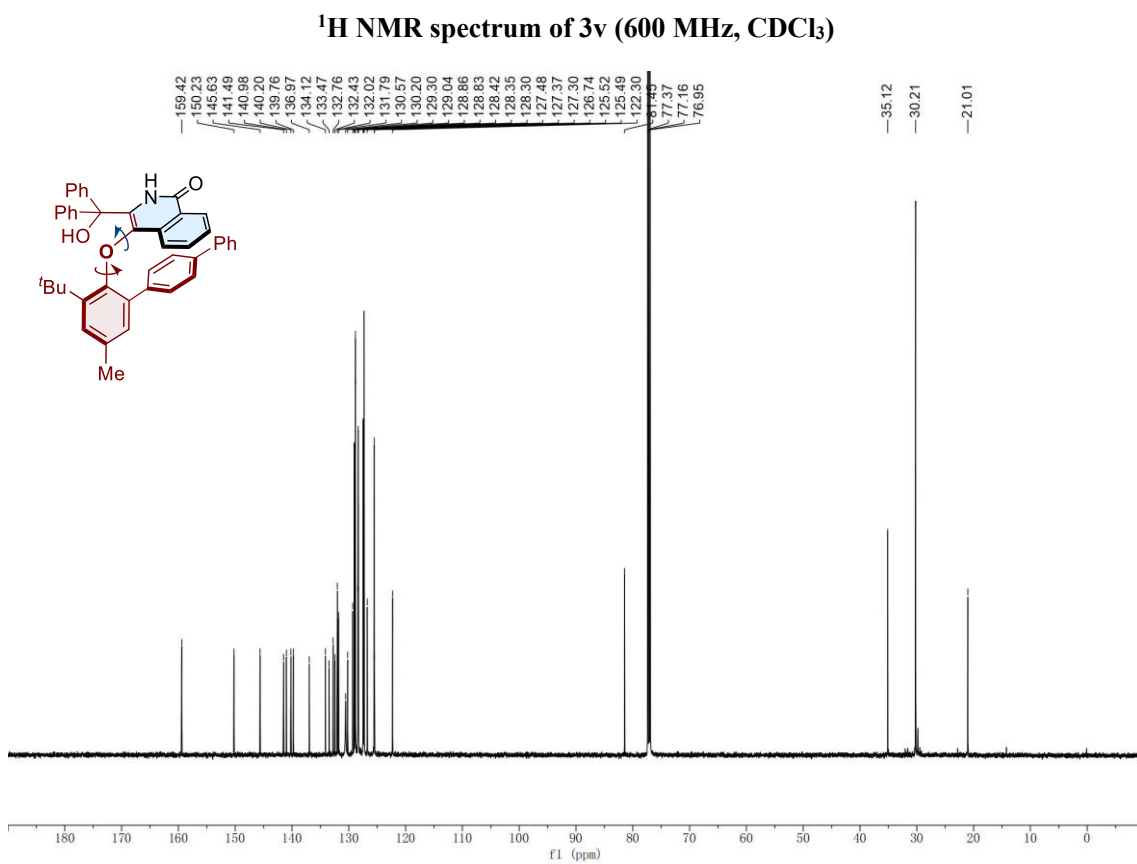

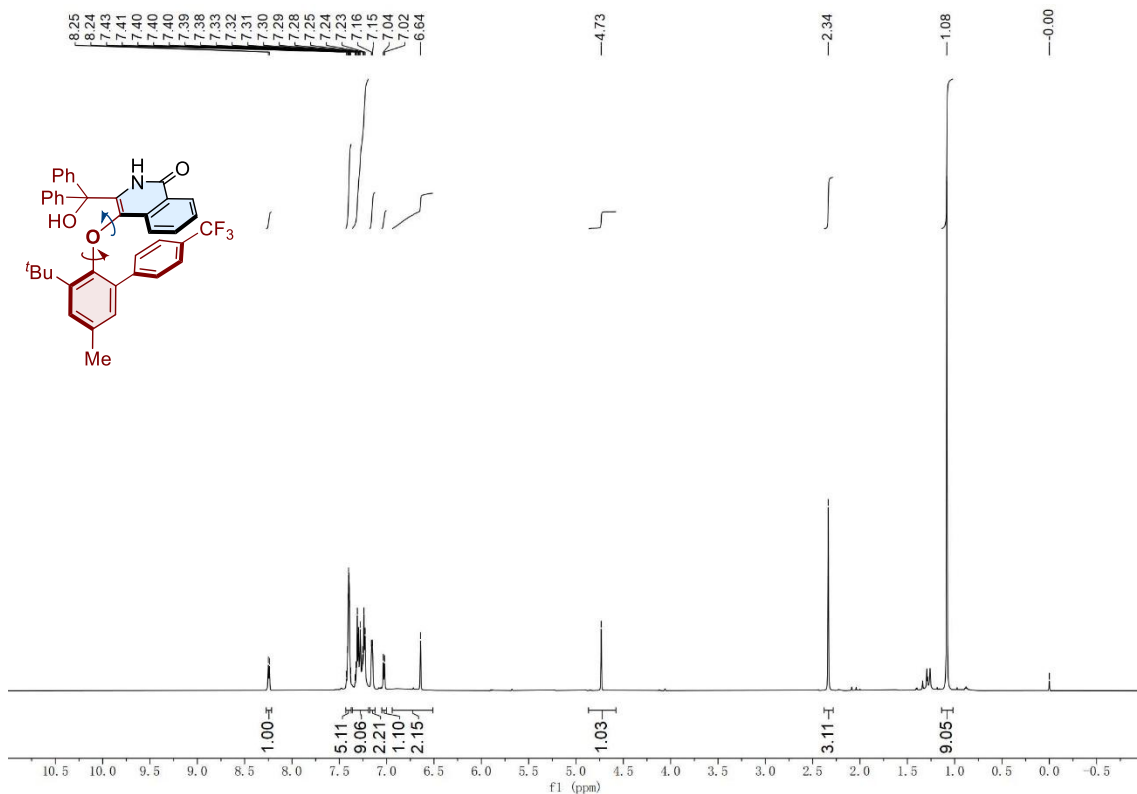

**<sup>1</sup>H NMR spectrum of 3w (600 MHz, CDCl<sub>3</sub>)**

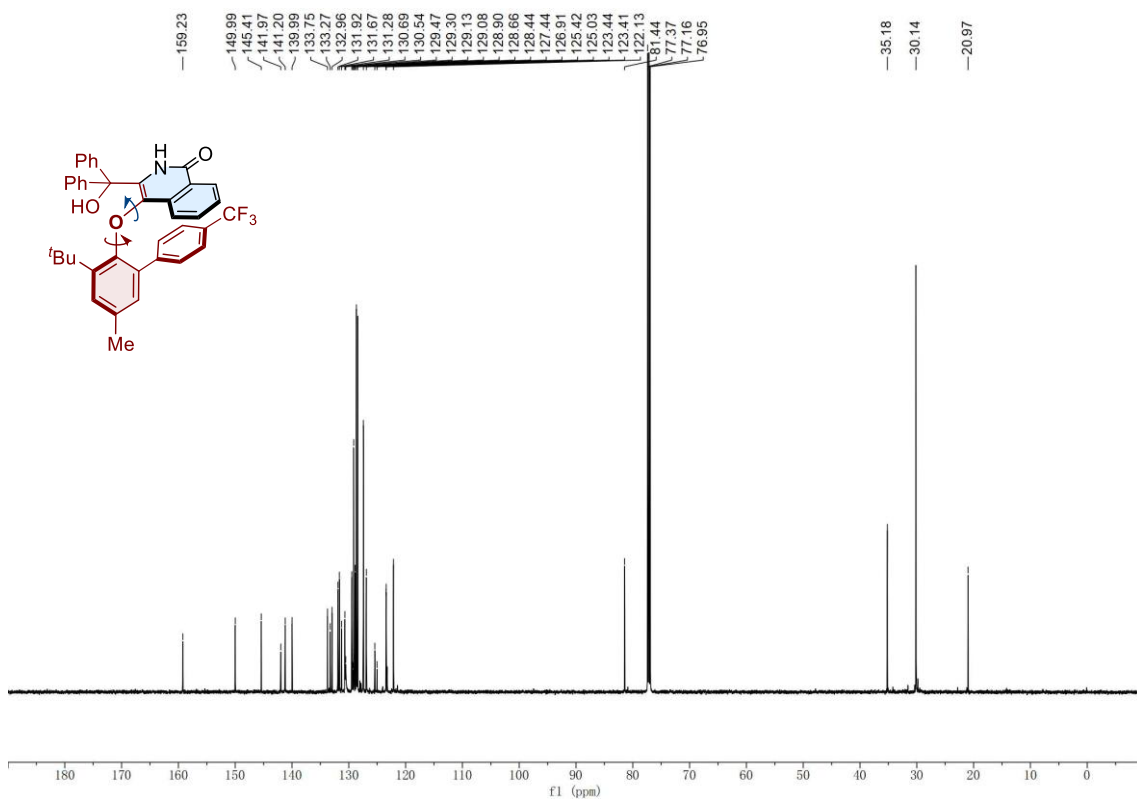

**<sup>13</sup>C NMR spectrum of 3w (151 MHz, CDCl<sub>3</sub>)**

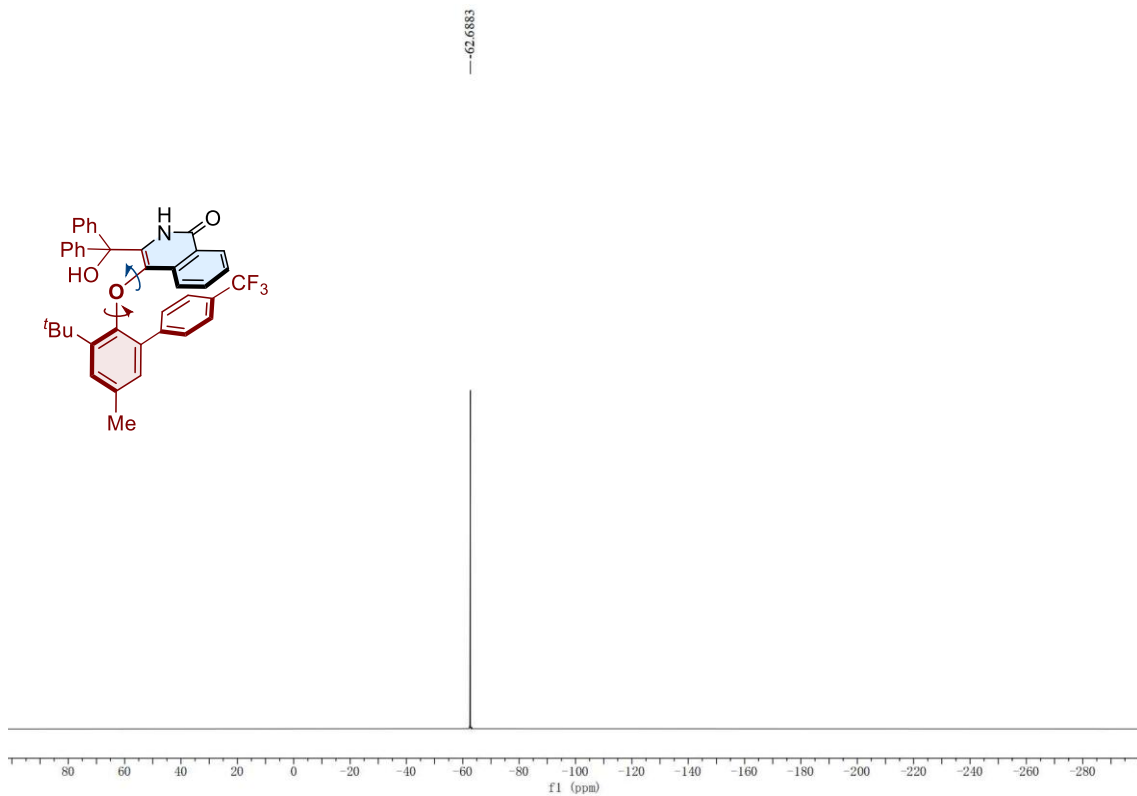

**<sup>19</sup>F NMR spectrum of 3w (565 MHz, CDCl<sub>3</sub>)**

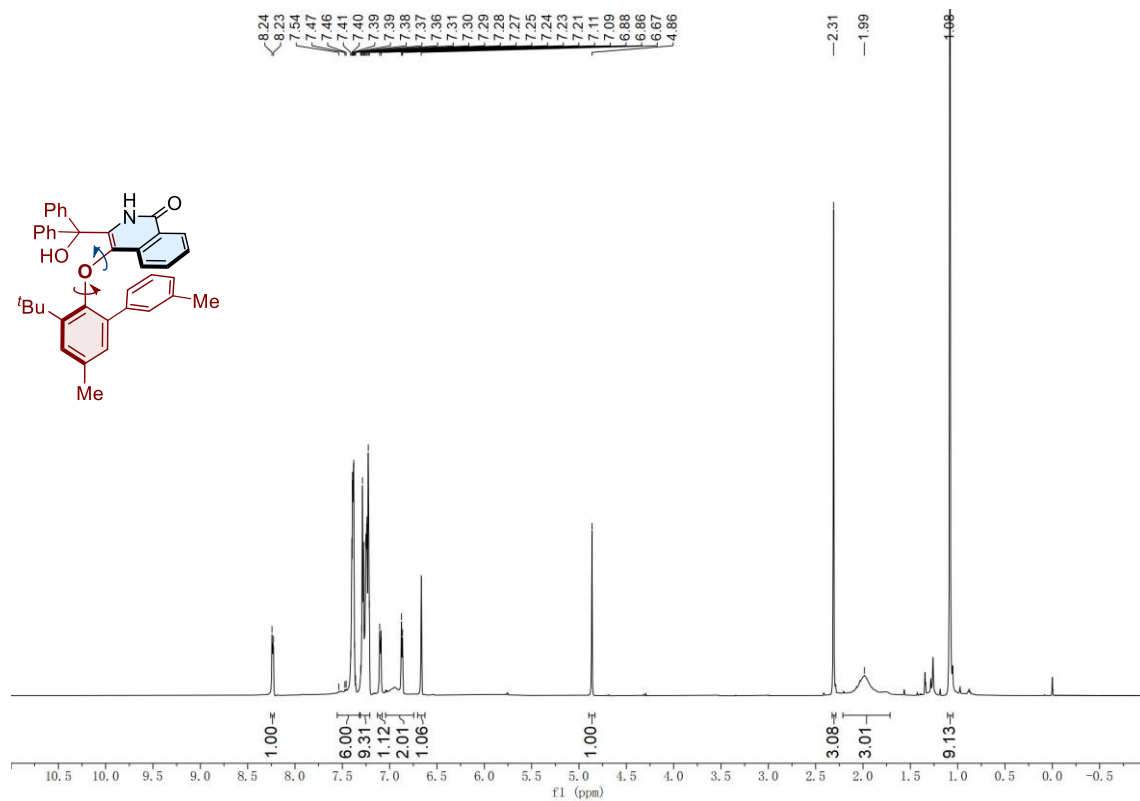

**<sup>1</sup>H NMR spectrum of 3x (600 MHz, CDCl<sub>3</sub>)**

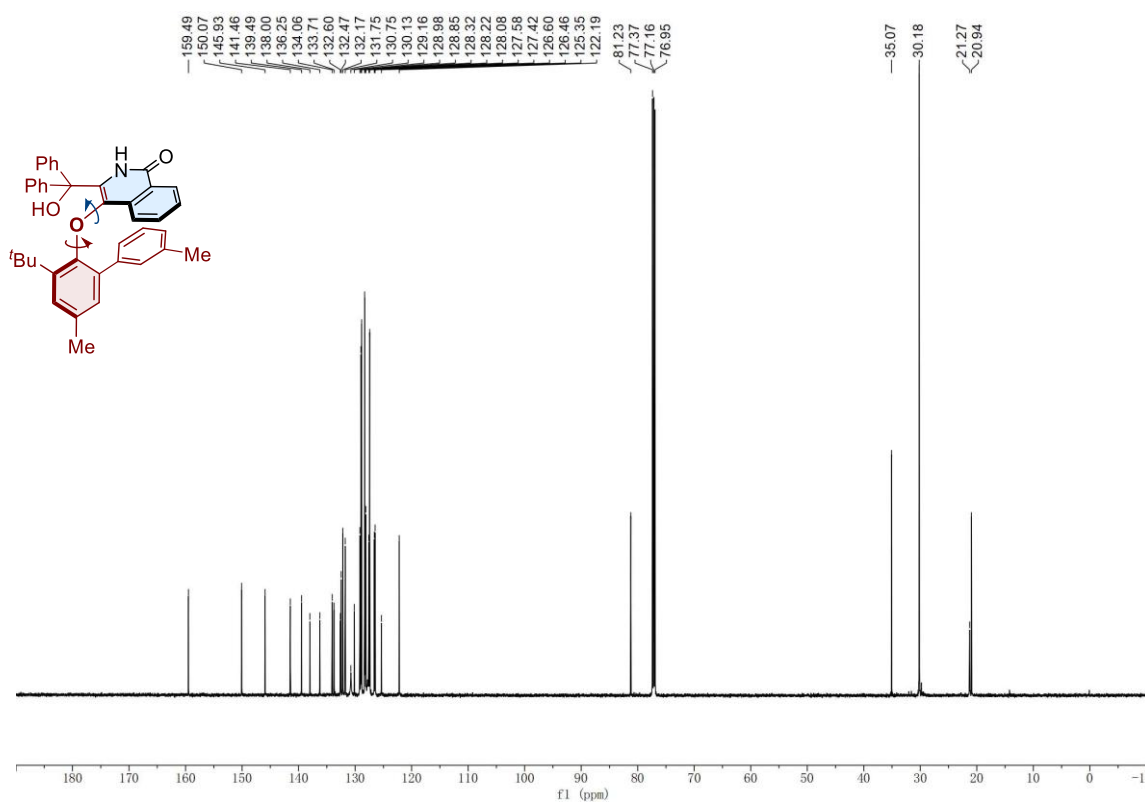

**<sup>13</sup>C NMR spectrum of 3x (151 MHz, CDCl<sub>3</sub>)**

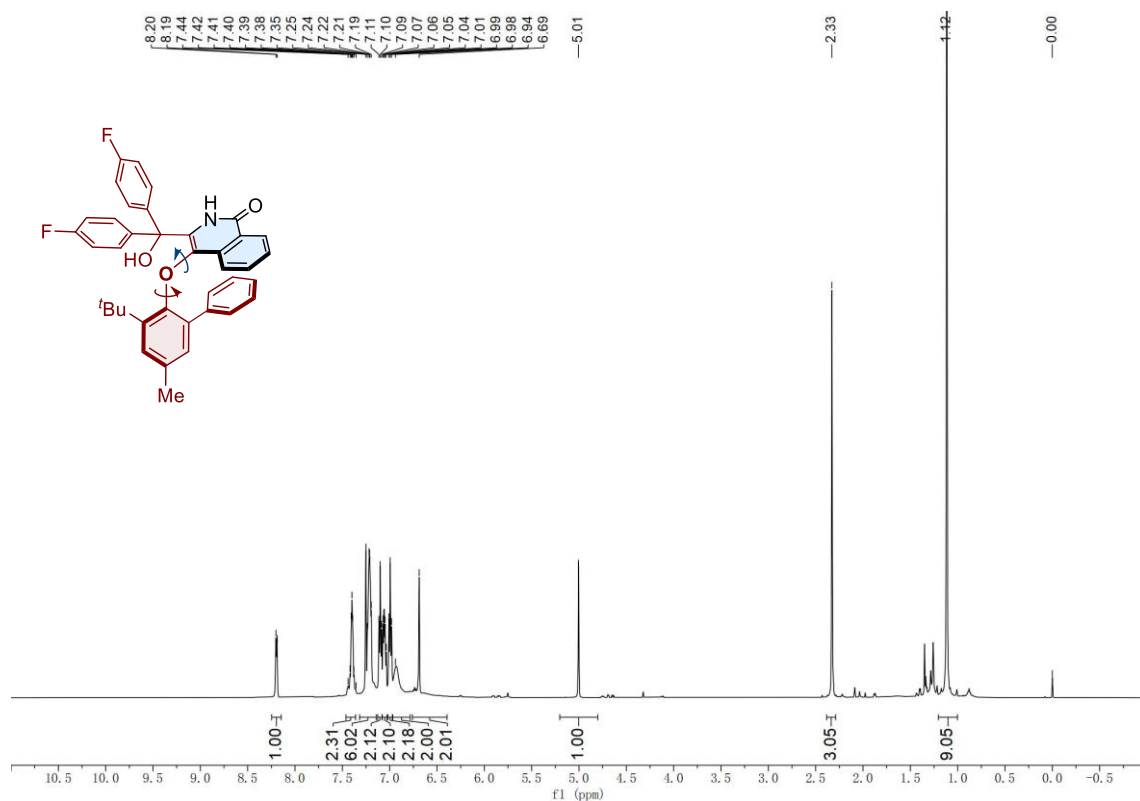

**<sup>1</sup>H NMR spectrum of 3y (600 MHz, CDCl<sub>3</sub>)**

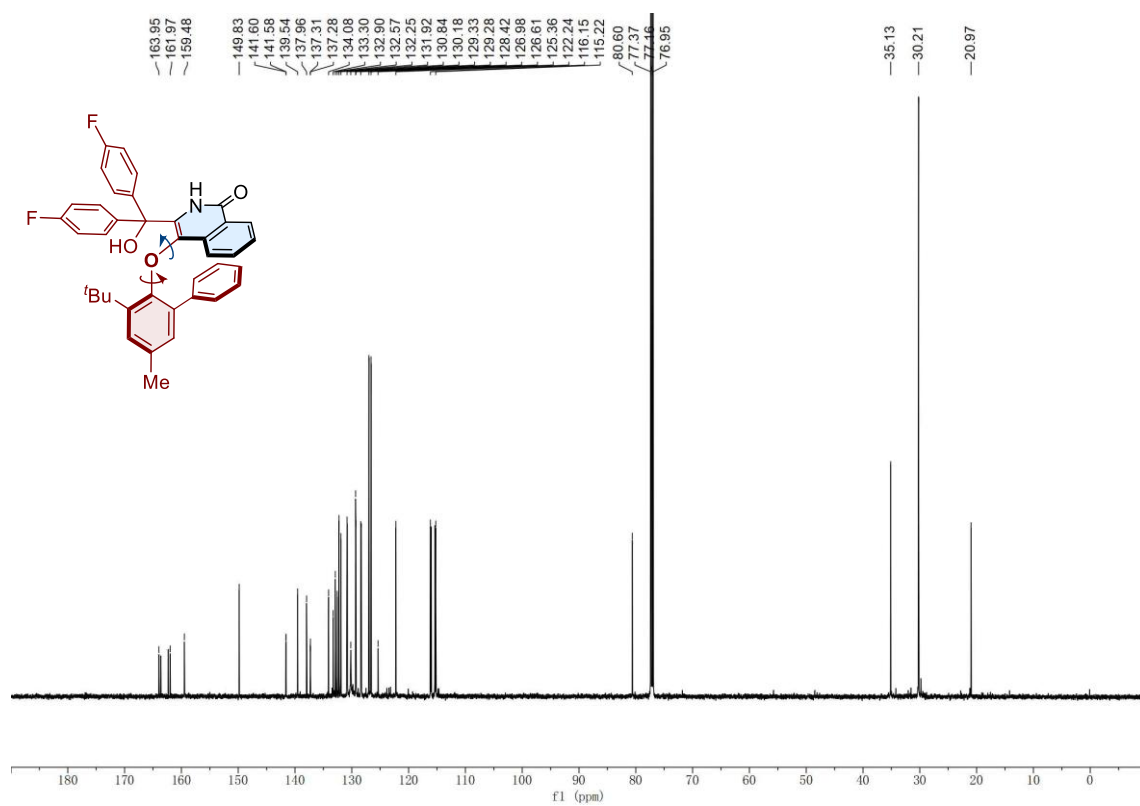

**<sup>13</sup>C NMR spectrum of 3y (151 MHz, CDCl<sub>3</sub>)**

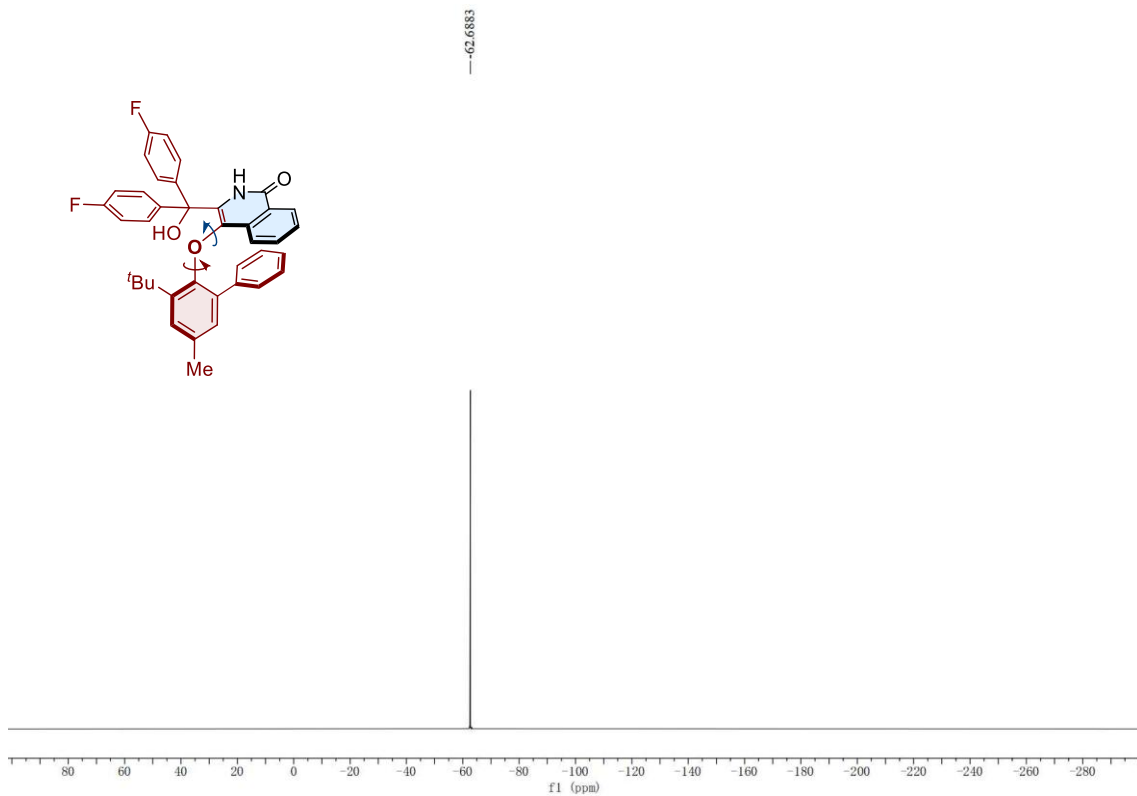

**<sup>19</sup>F NMR spectrum of 3y (565 MHz, CDCl<sub>3</sub>)**

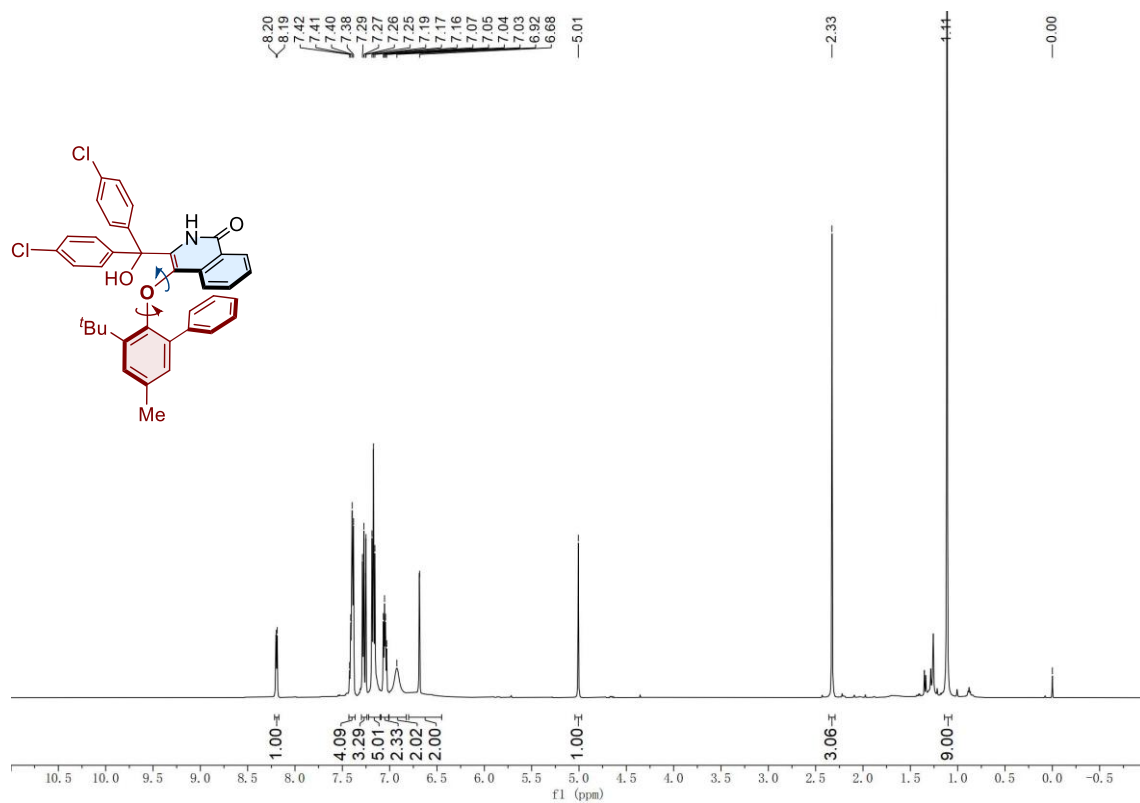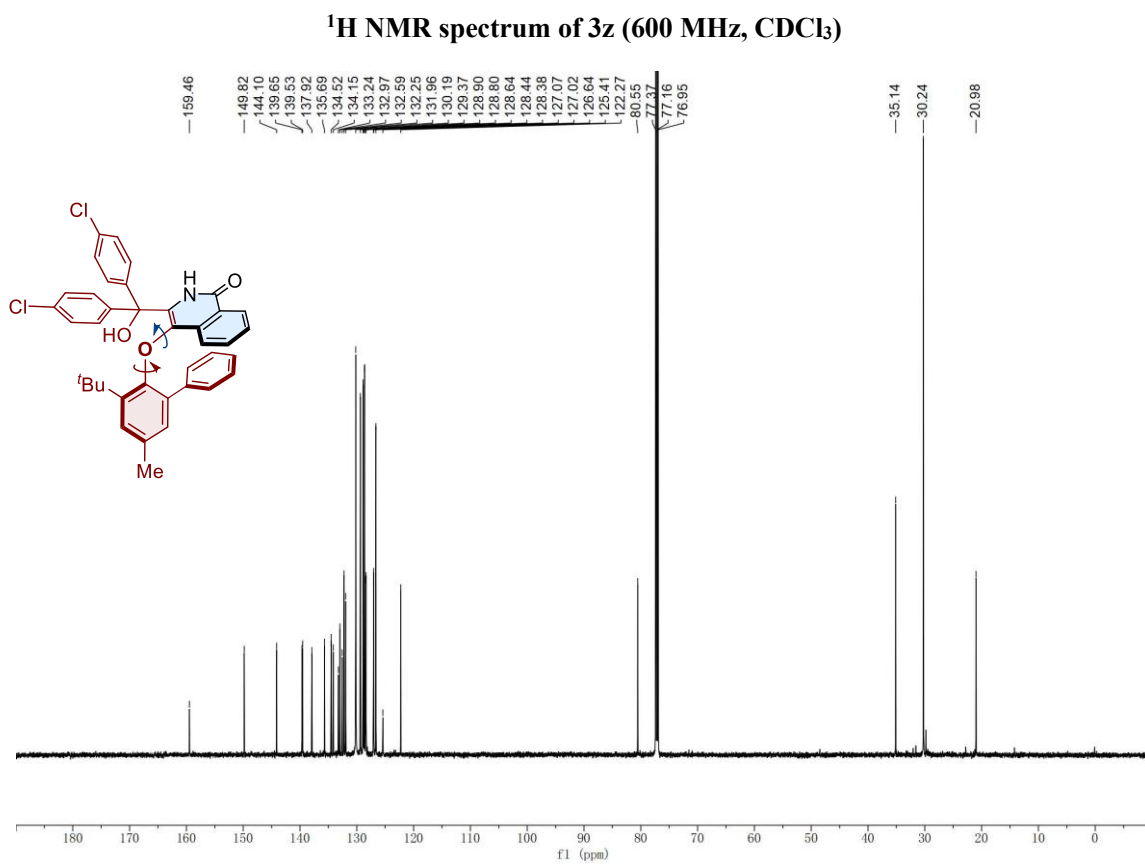

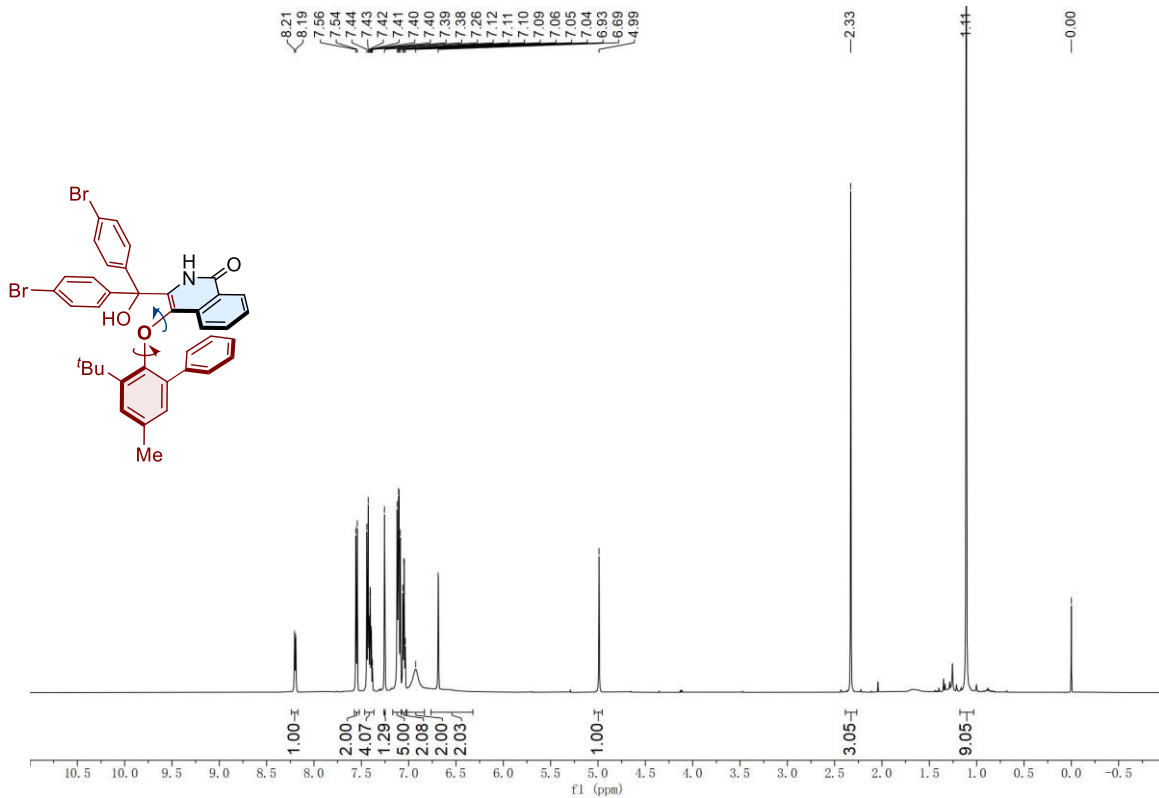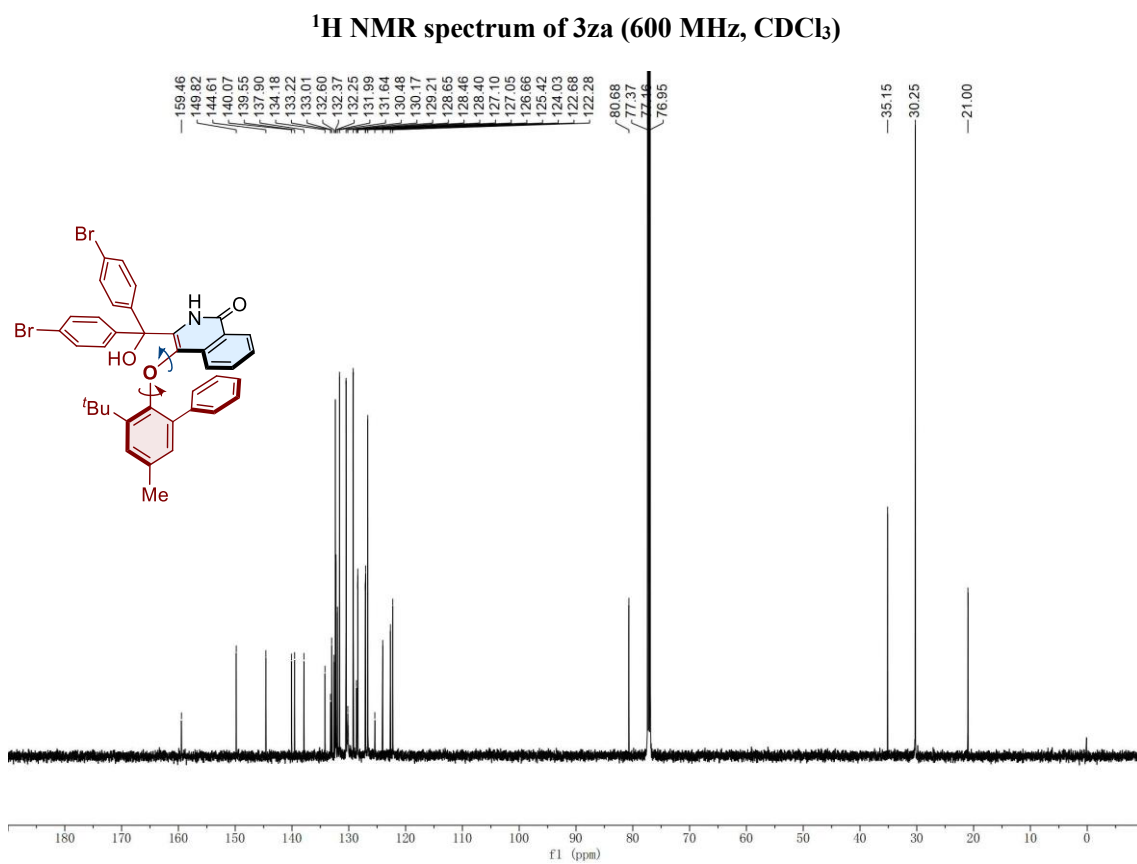

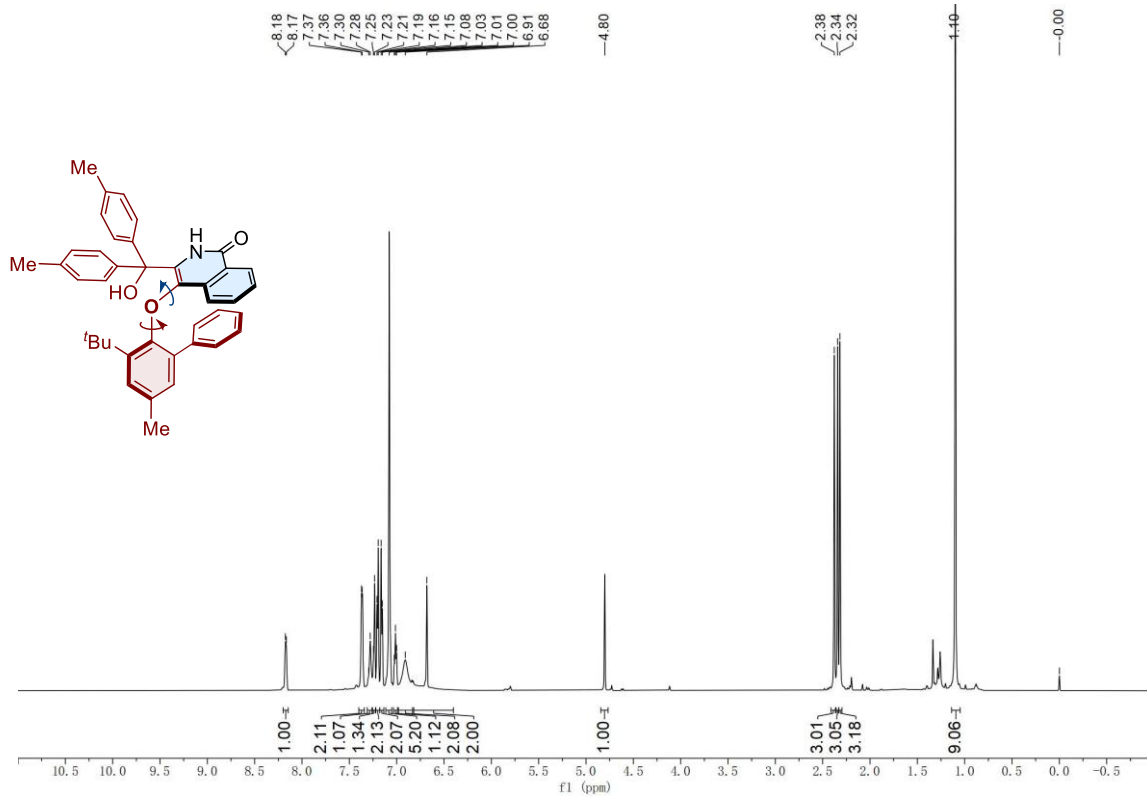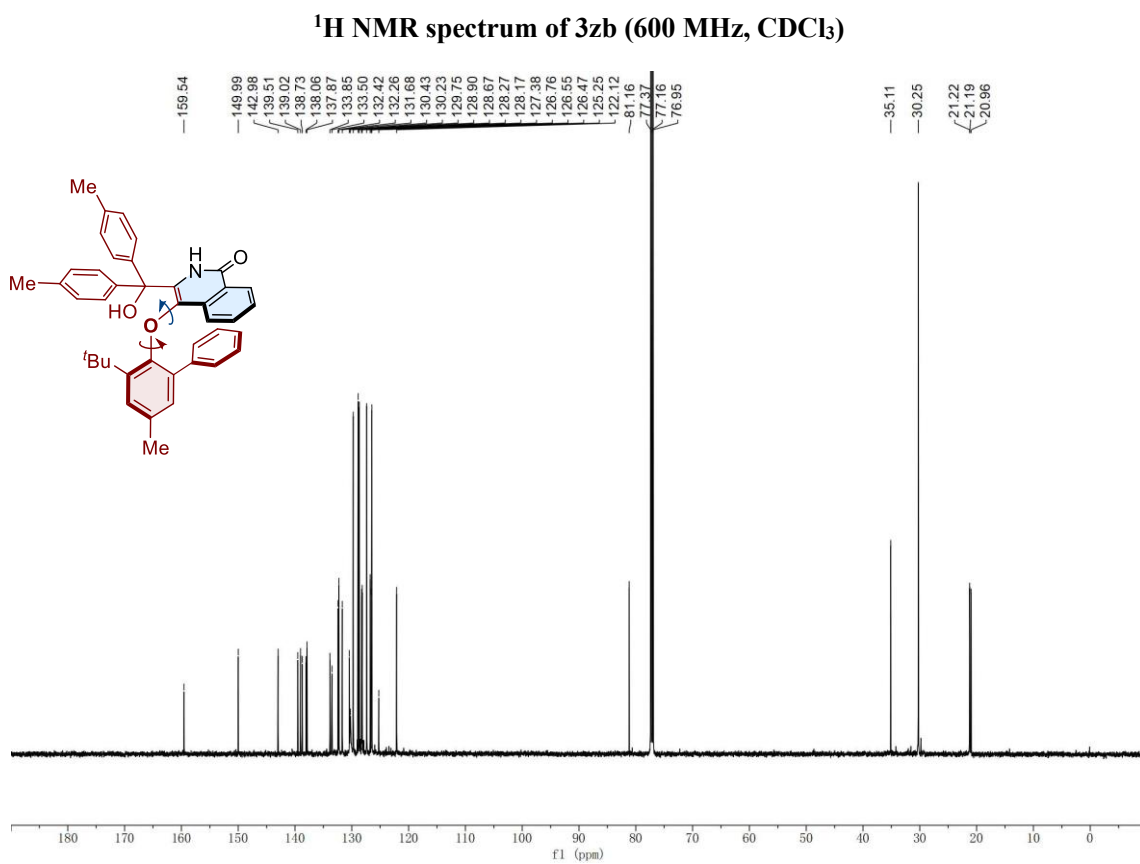

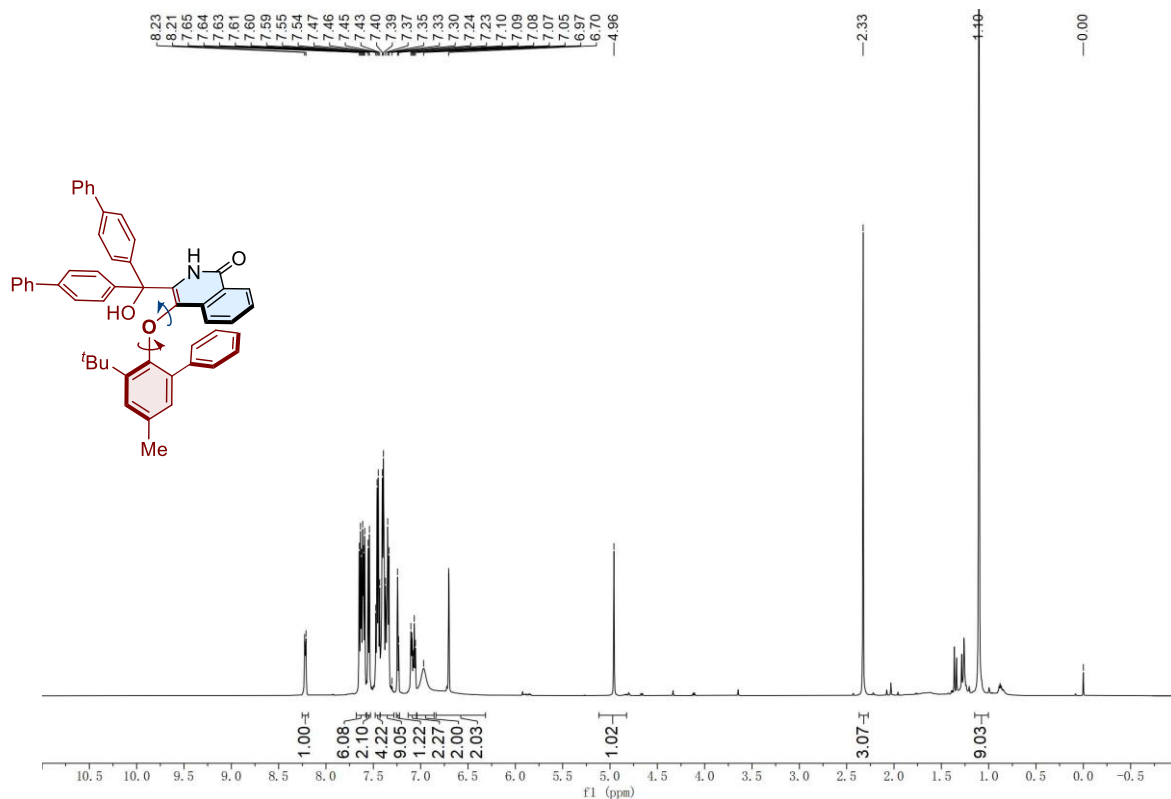

<sup>1</sup>H NMR spectrum of 3zc (600 MHz, CDCl<sub>3</sub>)

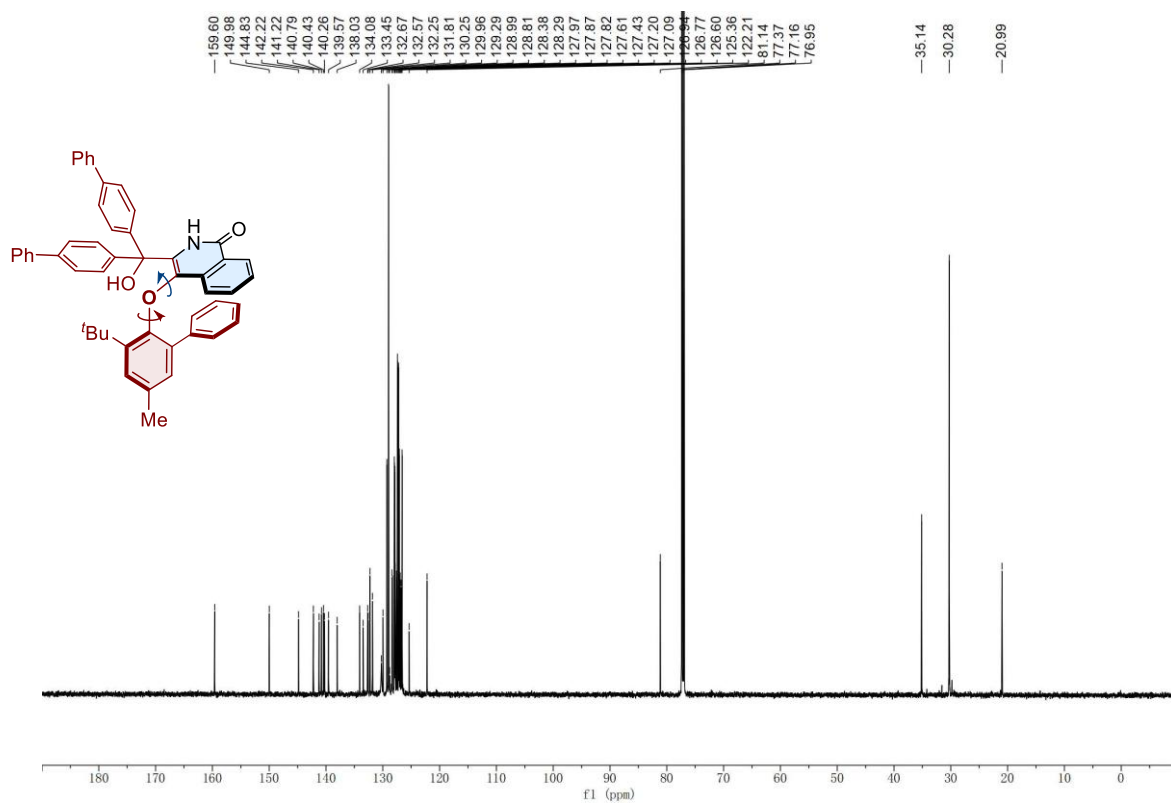

<sup>13</sup>C NMR spectrum of 3zc (151 MHz, CDCl<sub>3</sub>)

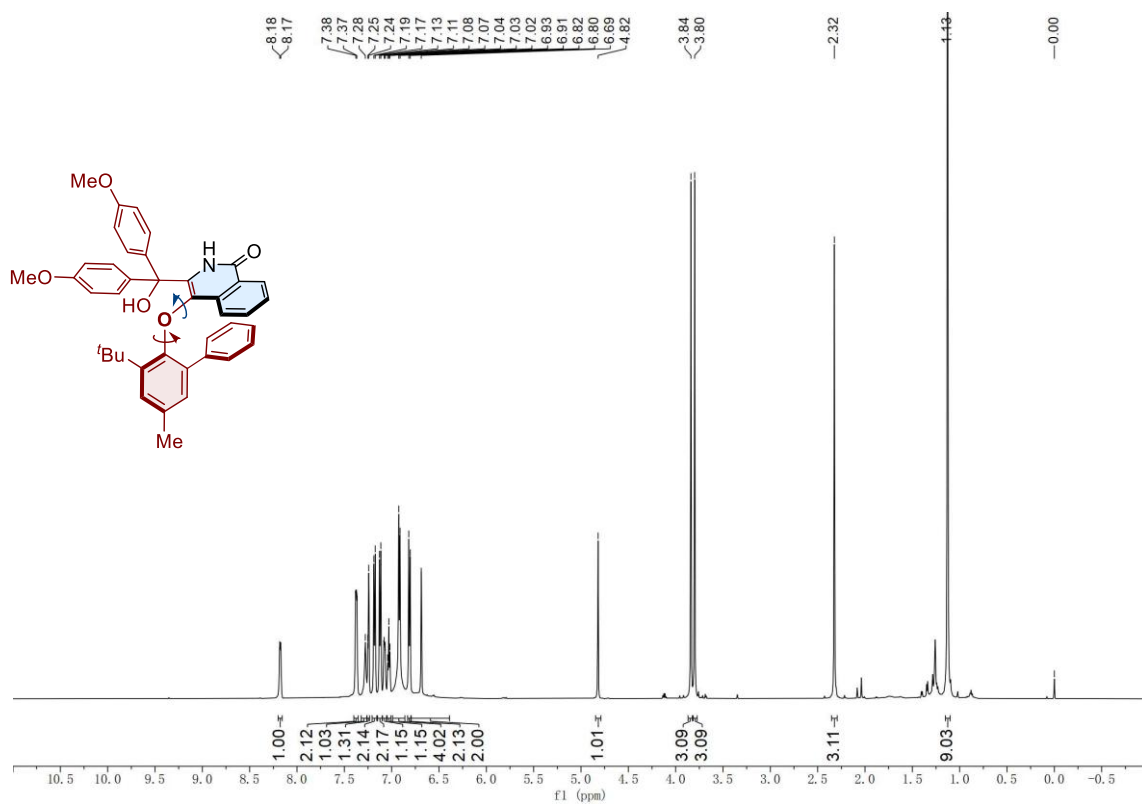

**<sup>1</sup>H NMR spectrum of 3zd (600 MHz, CDCl<sub>3</sub>)**

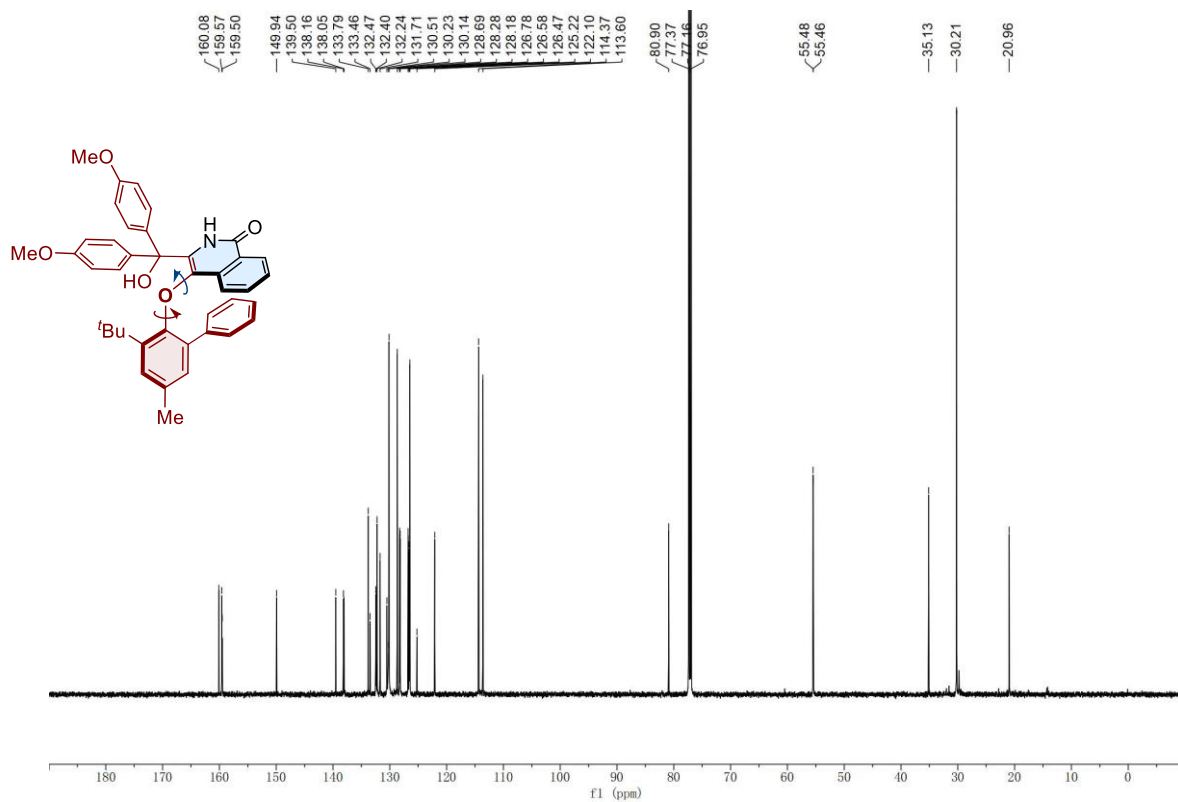

**<sup>13</sup>C NMR spectrum of 3zd (151 MHz, CDCl<sub>3</sub>)**

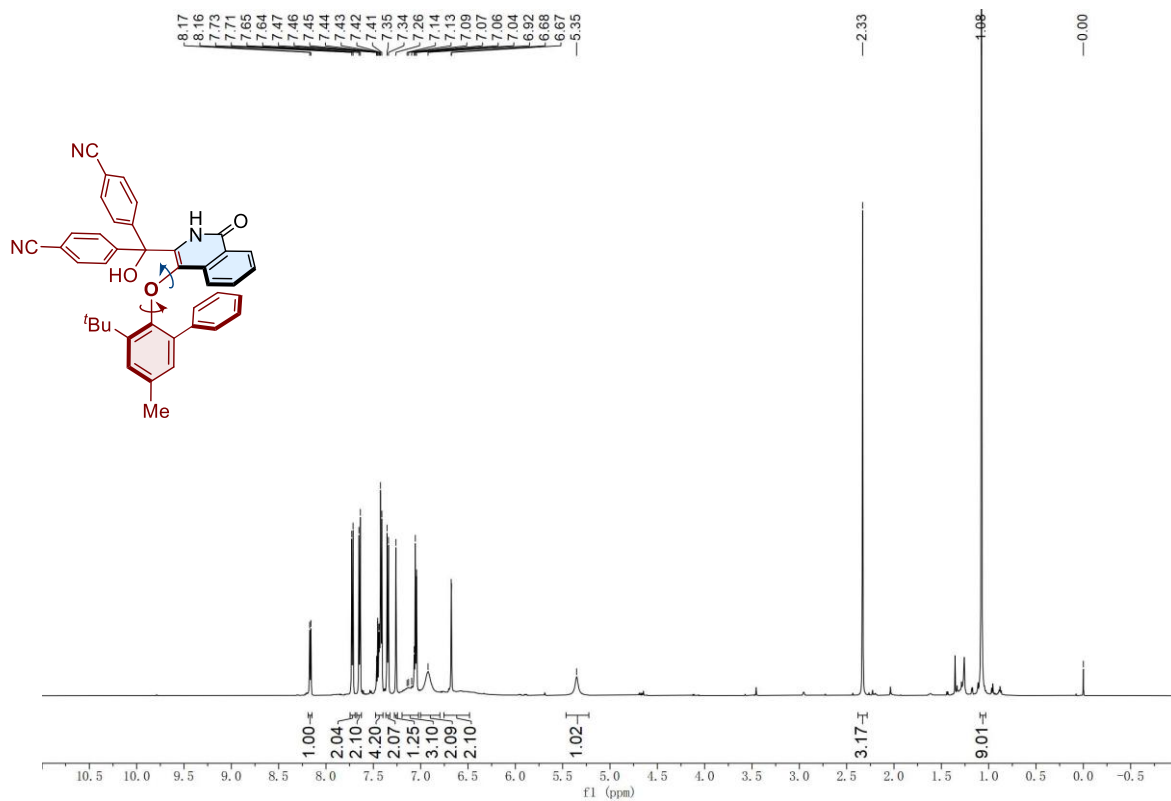

<sup>1</sup>H NMR spectrum of 3ze (600 MHz, CDCl<sub>3</sub>)

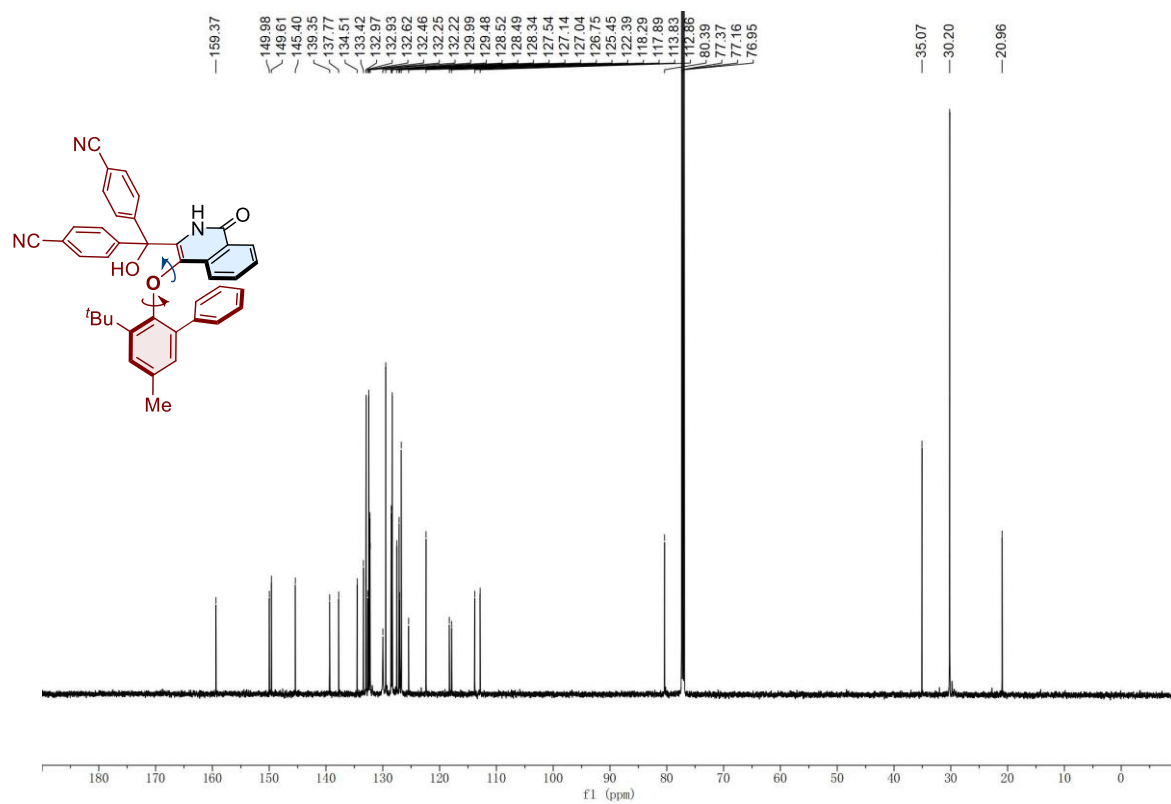

<sup>13</sup>C NMR spectrum of 3ze (151 MHz, CDCl<sub>3</sub>)

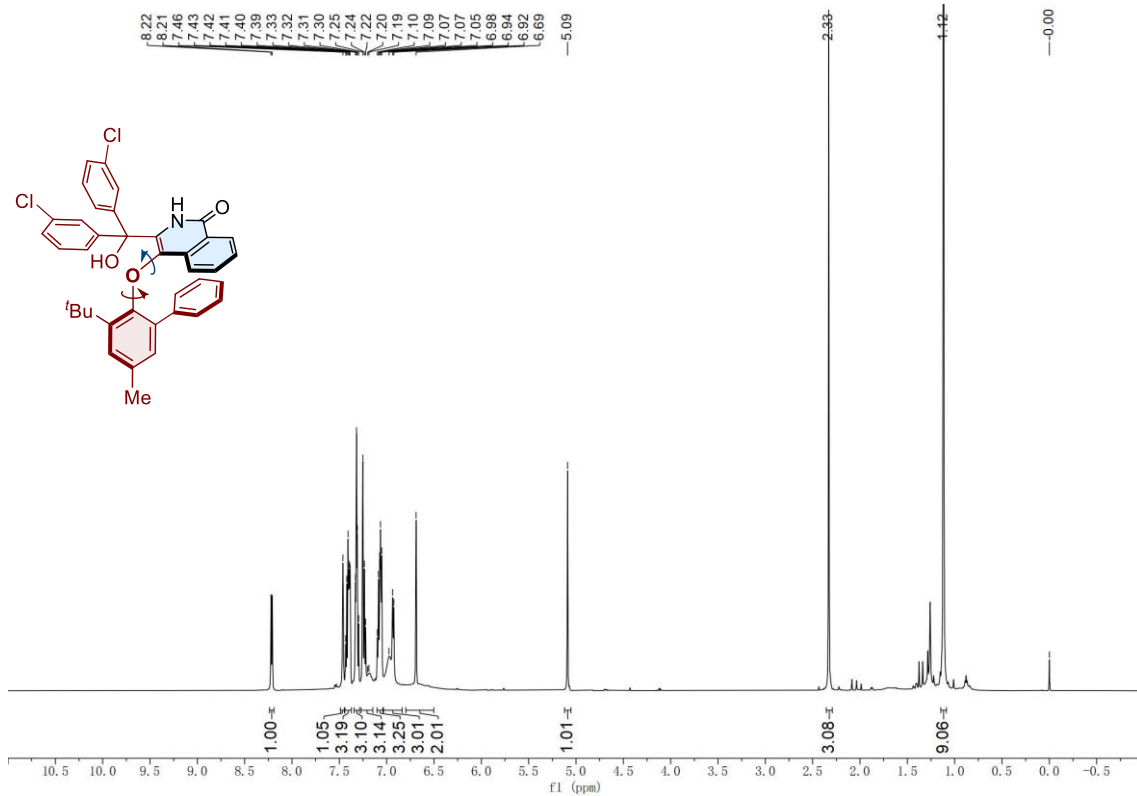

**<sup>1</sup>H NMR spectrum of 3zf (600 MHz, CDCl<sub>3</sub>)**

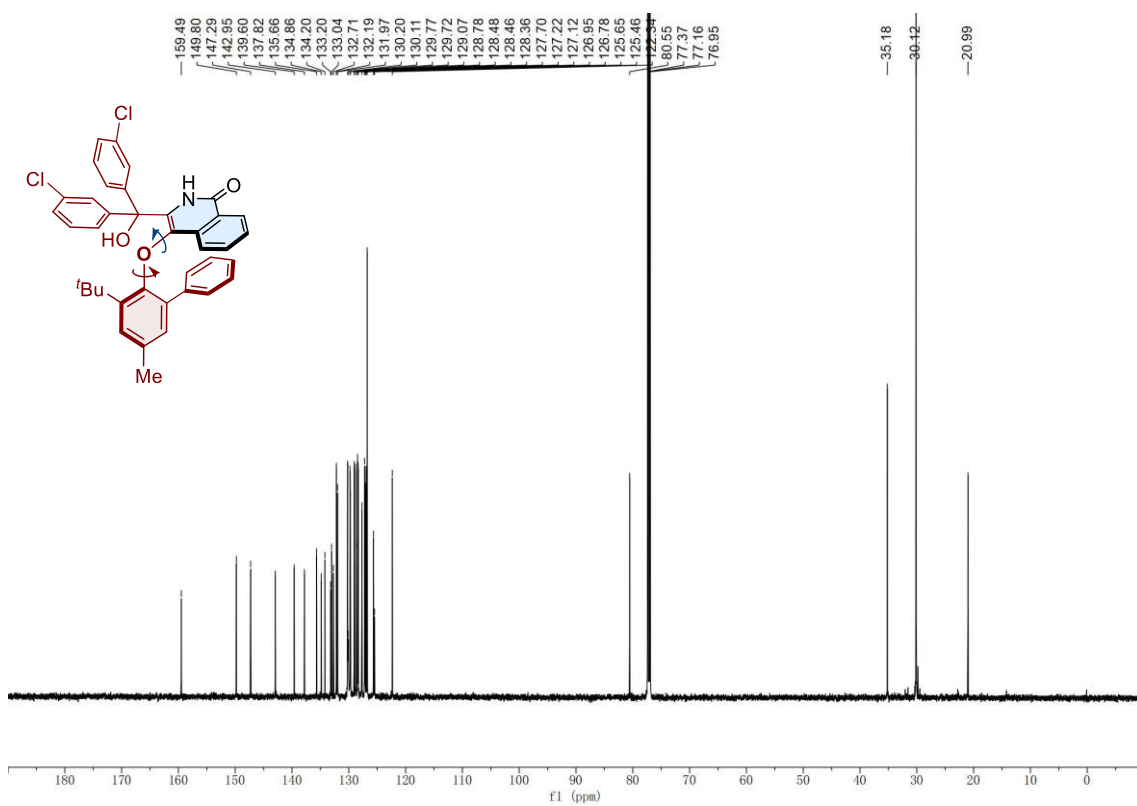

**<sup>13</sup>C NMR spectrum of 3zf (151 MHz, CDCl<sub>3</sub>)**

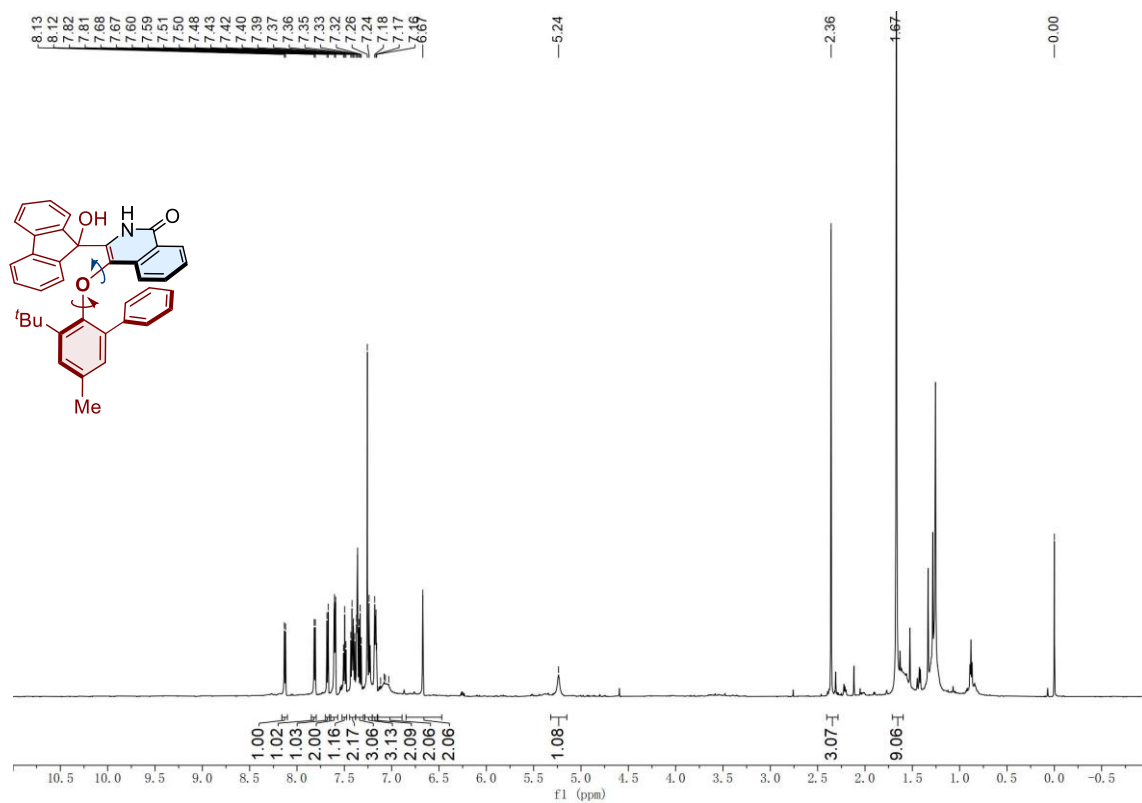

<sup>1</sup>H NMR spectrum of 3zg (600 MHz, CDCl<sub>3</sub>)

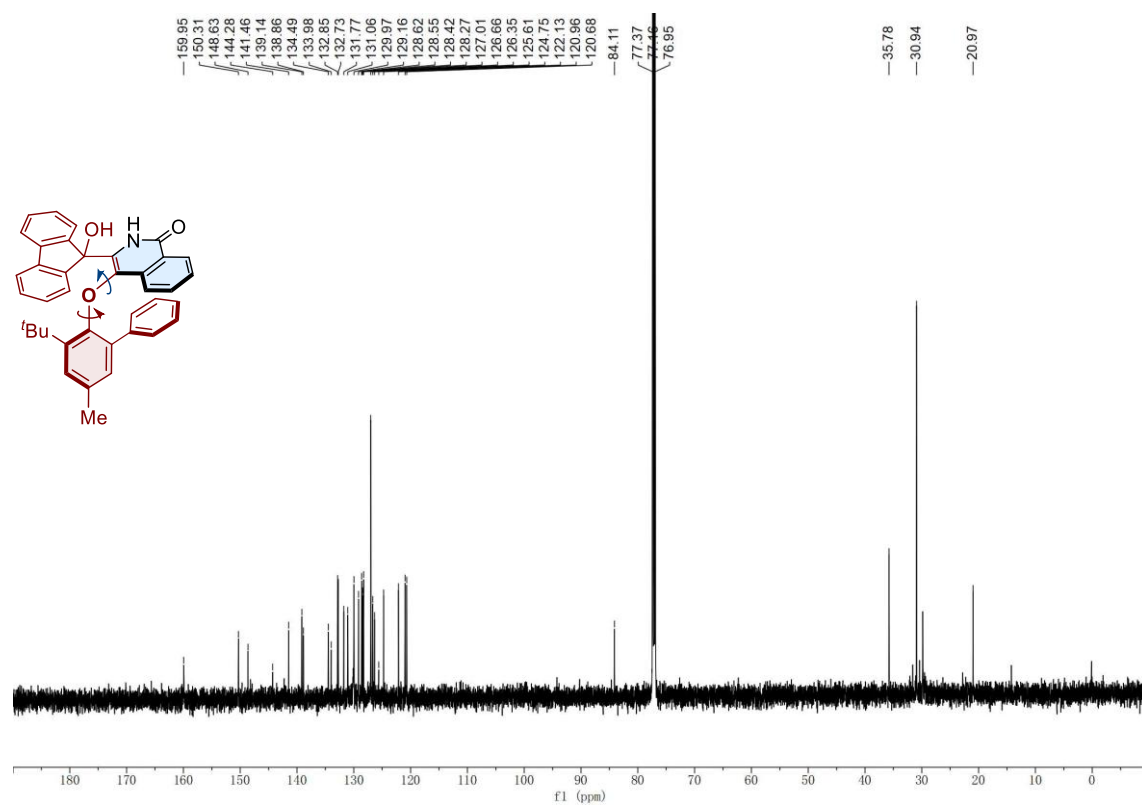

<sup>13</sup>C NMR spectrum of 3zg (151 MHz, CDCl<sub>3</sub>)

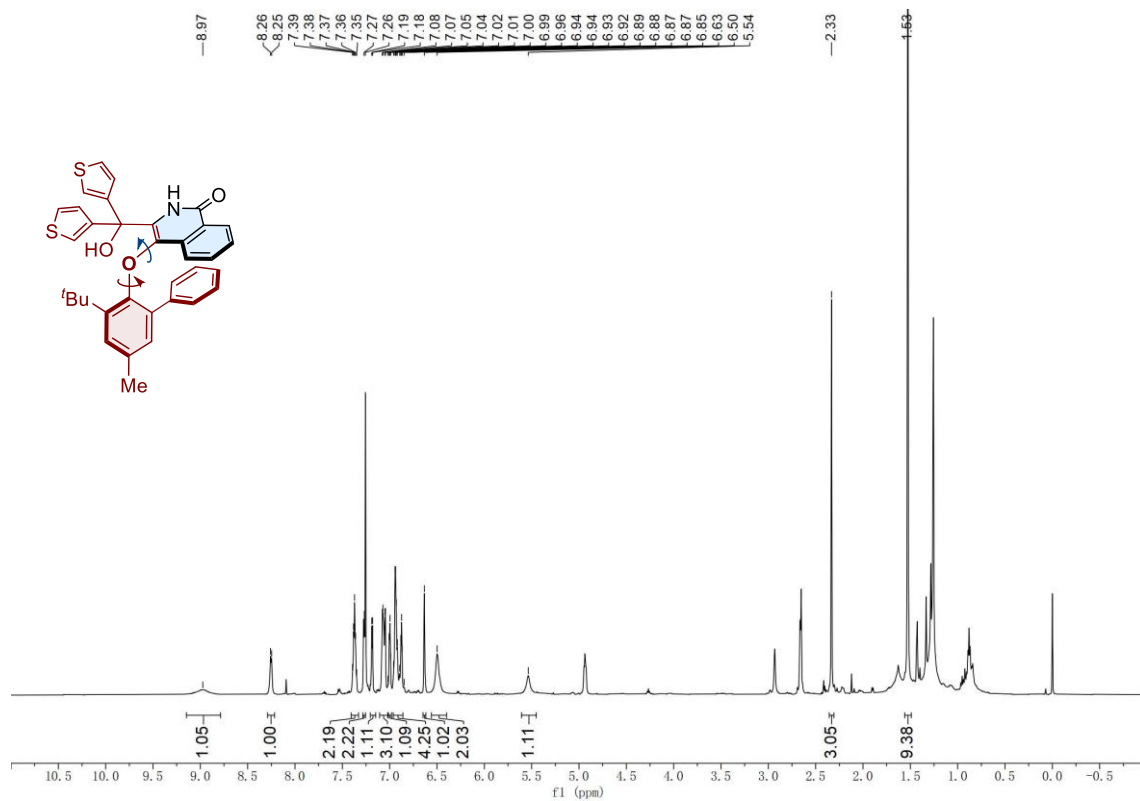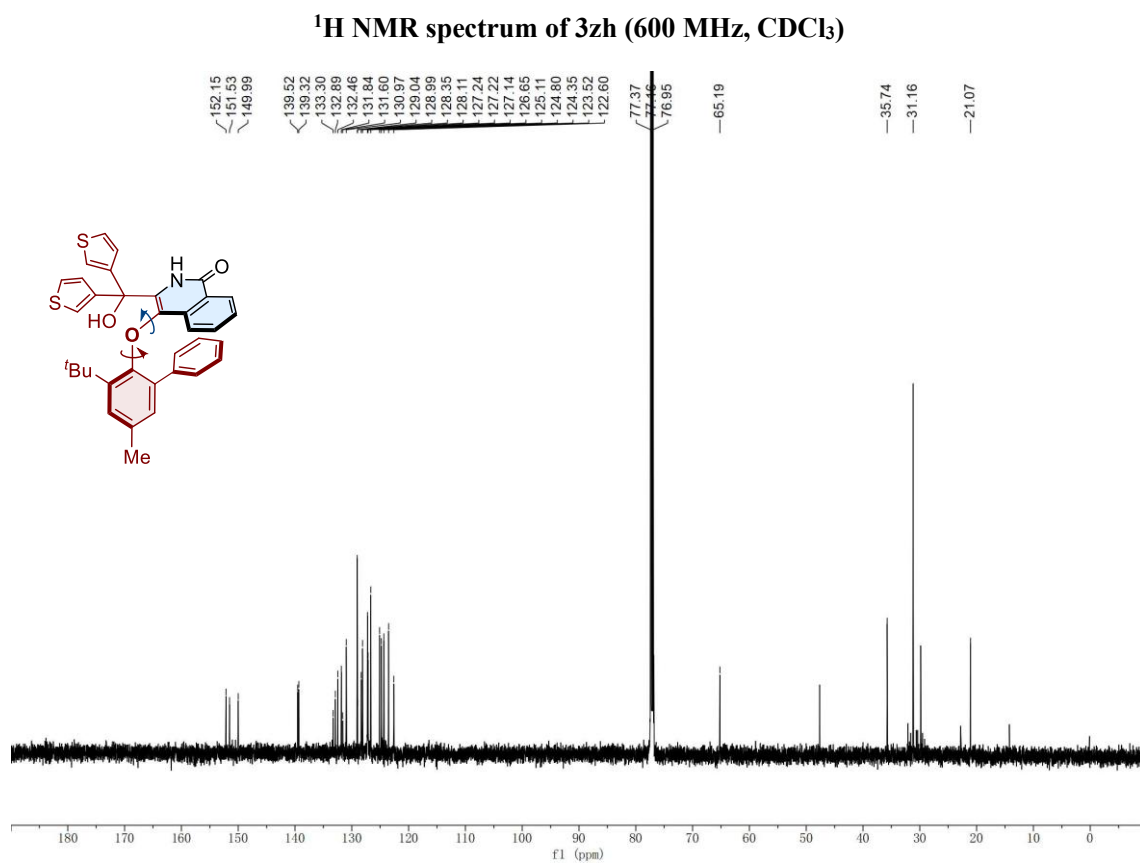

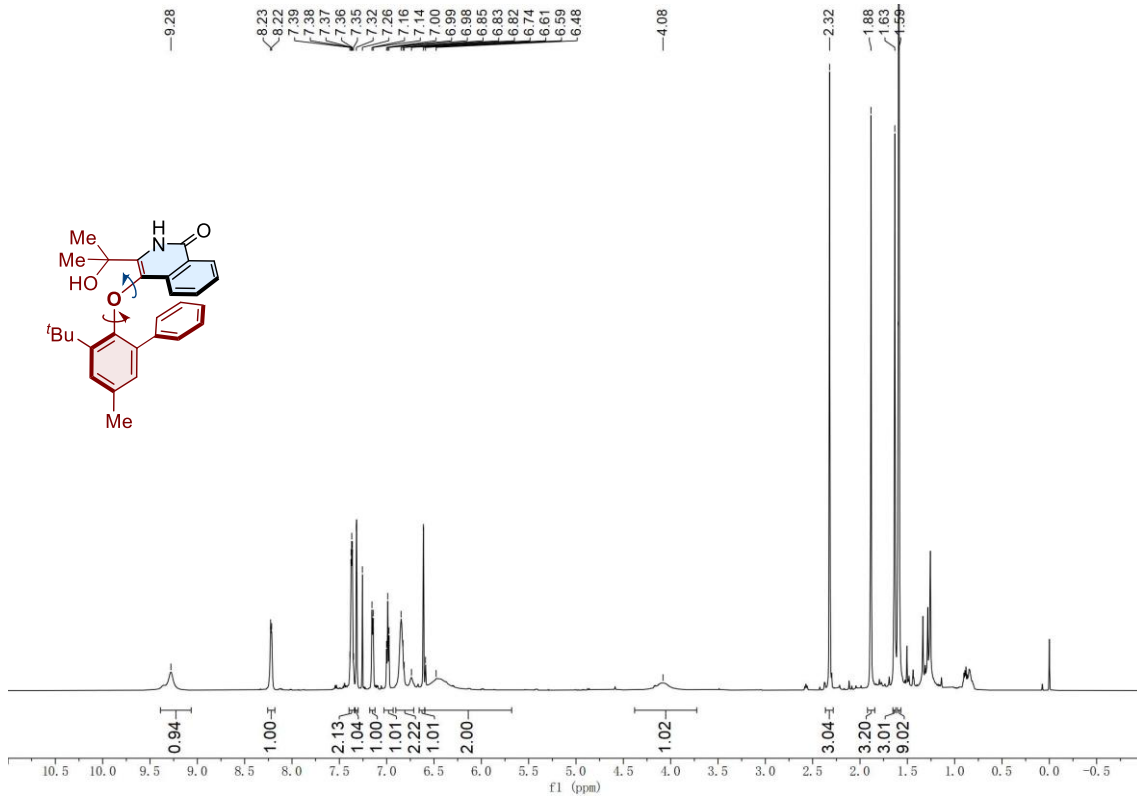

**<sup>1</sup>H NMR spectrum of 3zi (600 MHz, CDCl<sub>3</sub>)**

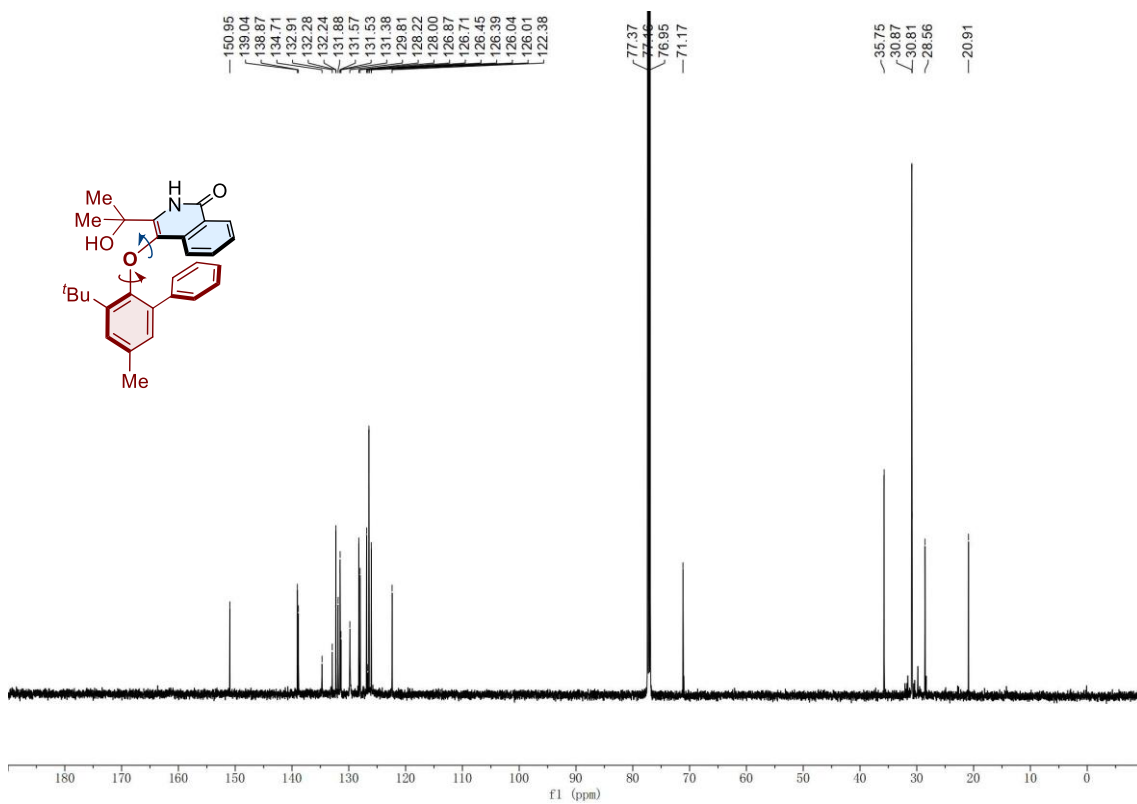

**<sup>13</sup>C NMR spectrum of 3zi (151 MHz, CDCl<sub>3</sub>)**

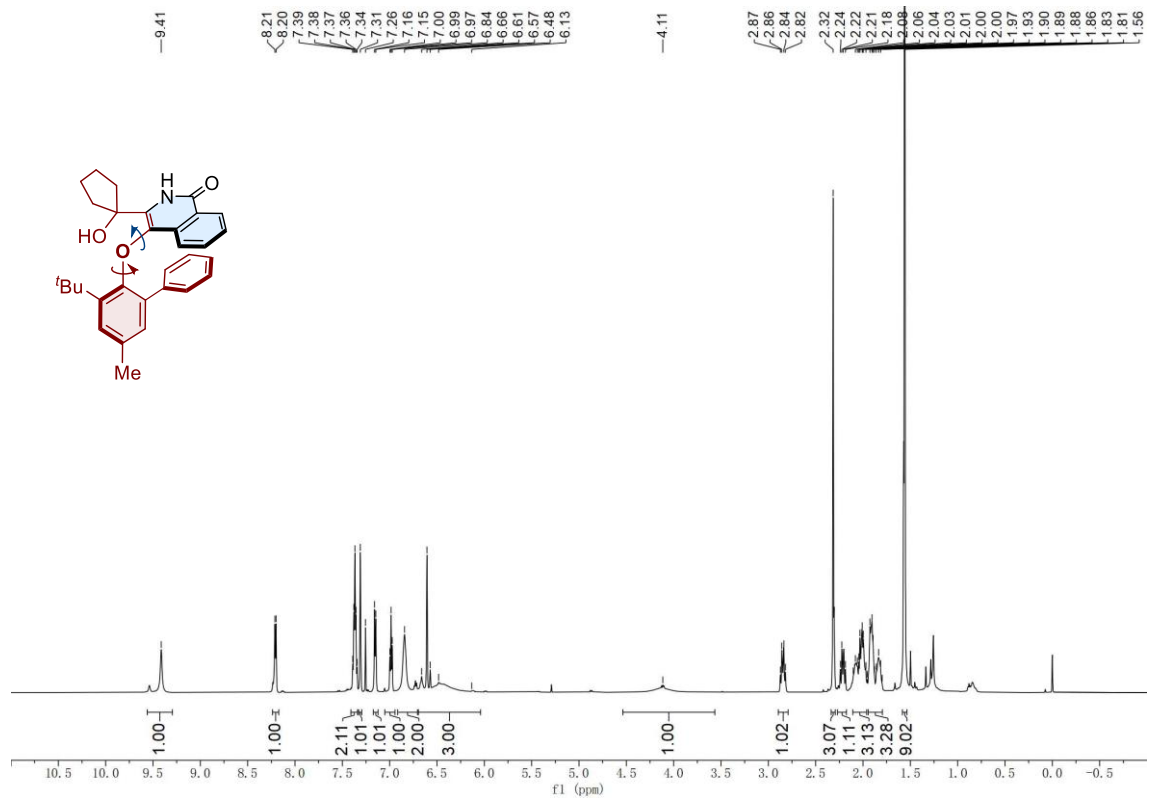

**<sup>1</sup>H NMR spectrum of 3zj (600 MHz, CDCl<sub>3</sub>)**

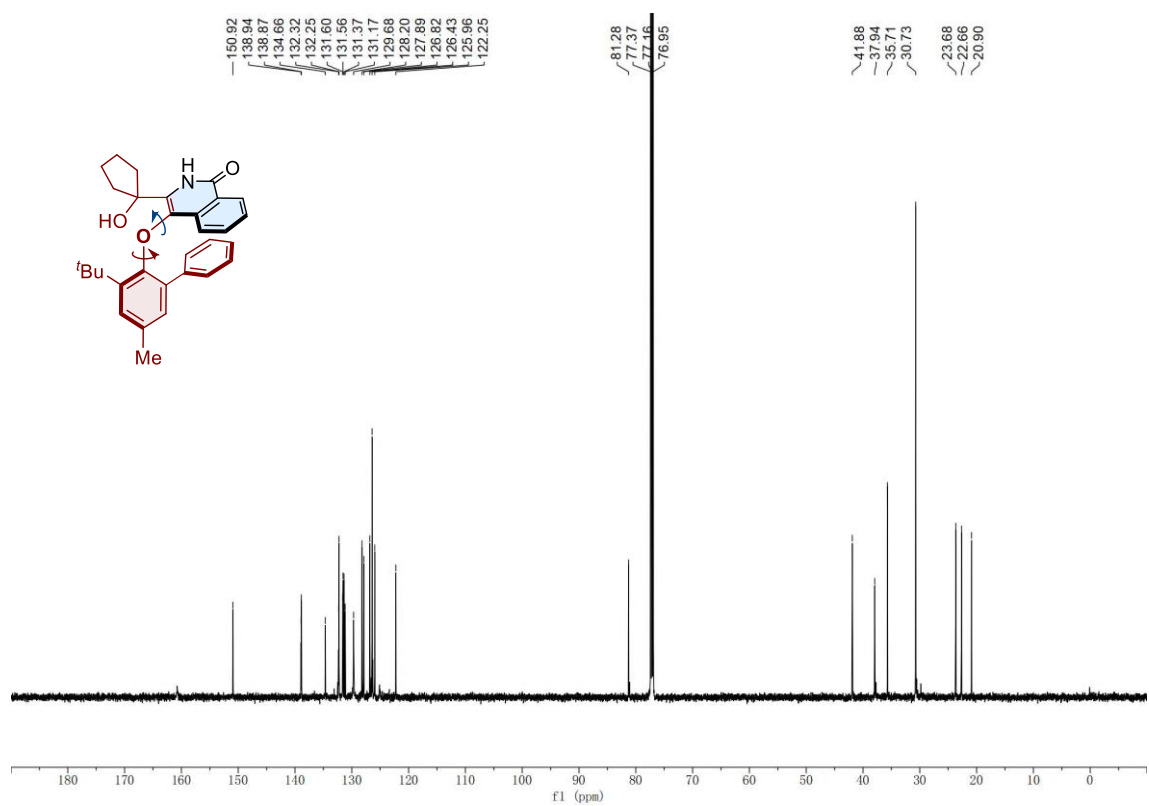

**<sup>13</sup>C NMR spectrum of 3zj (151 MHz, CDCl<sub>3</sub>)**

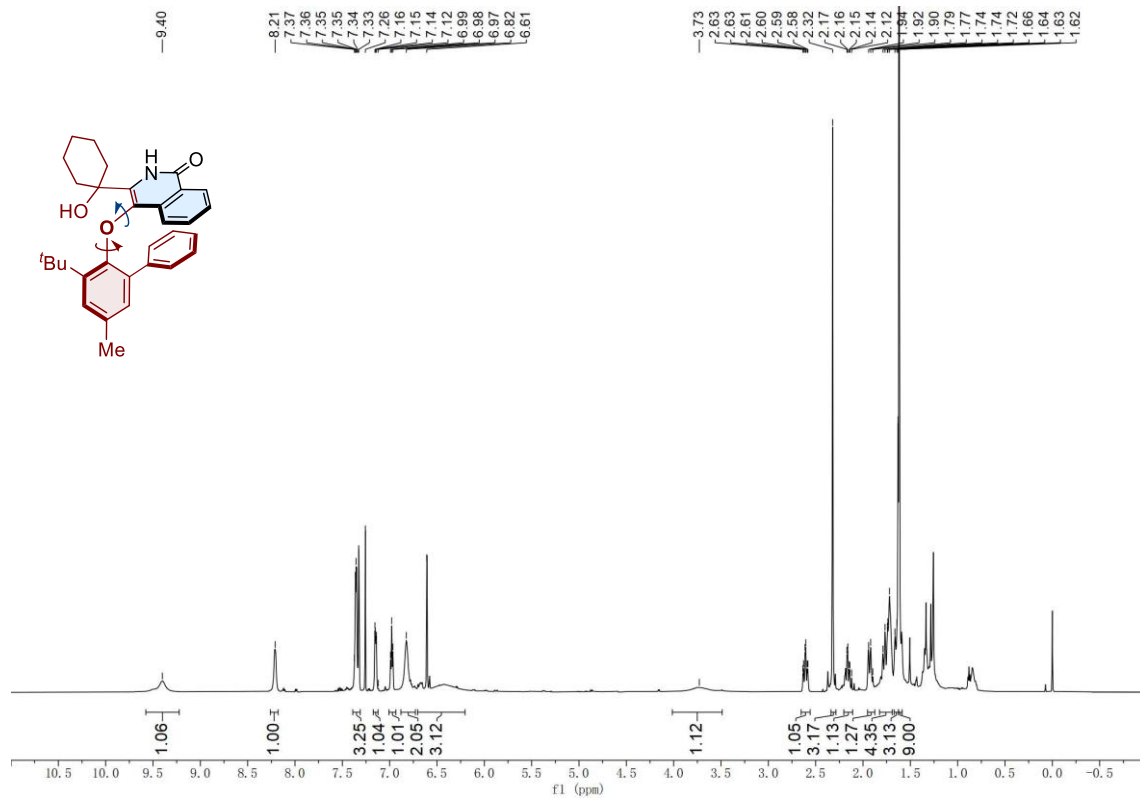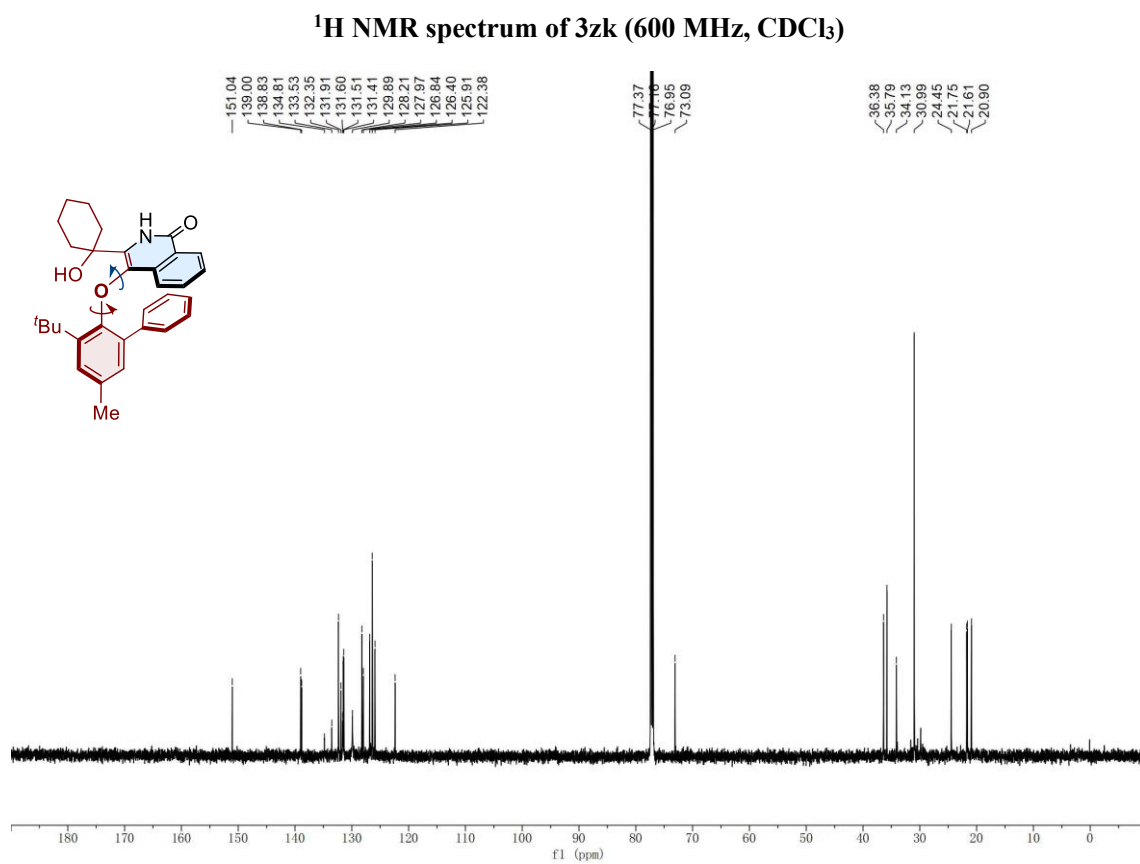

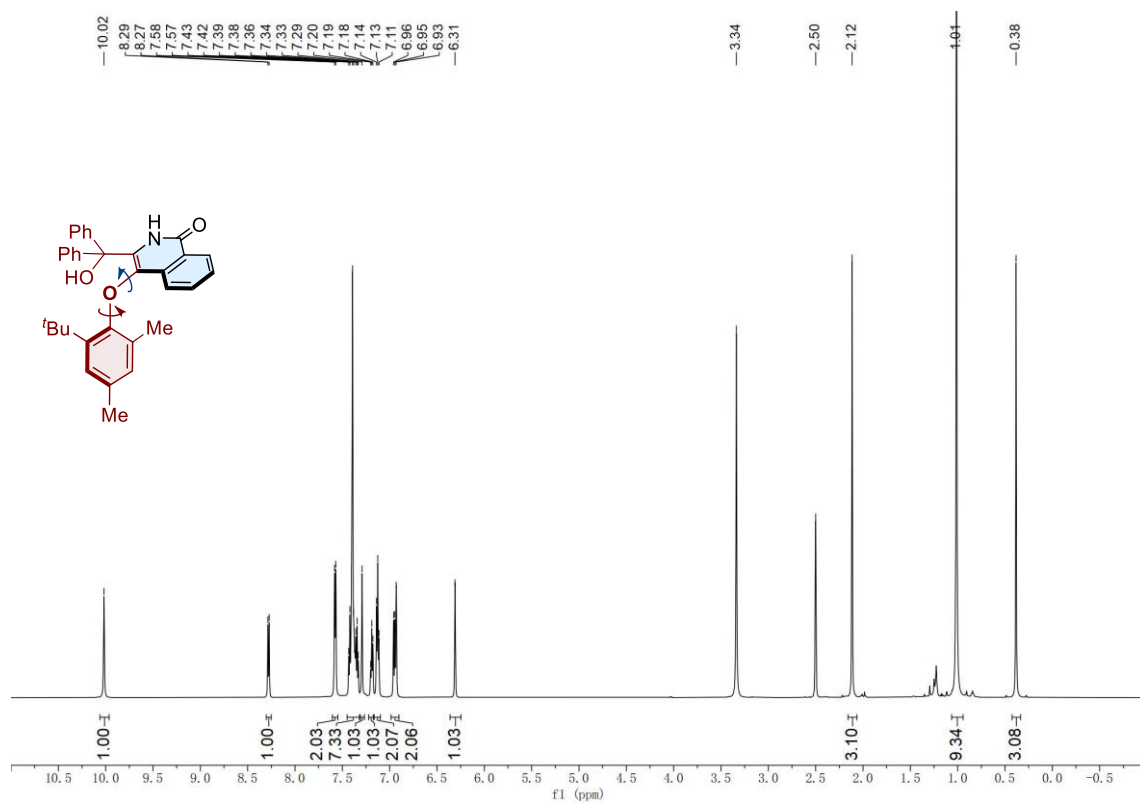

<sup>1</sup>H NMR spectrum of 3zl (600 MHz, CDCl<sub>3</sub>)

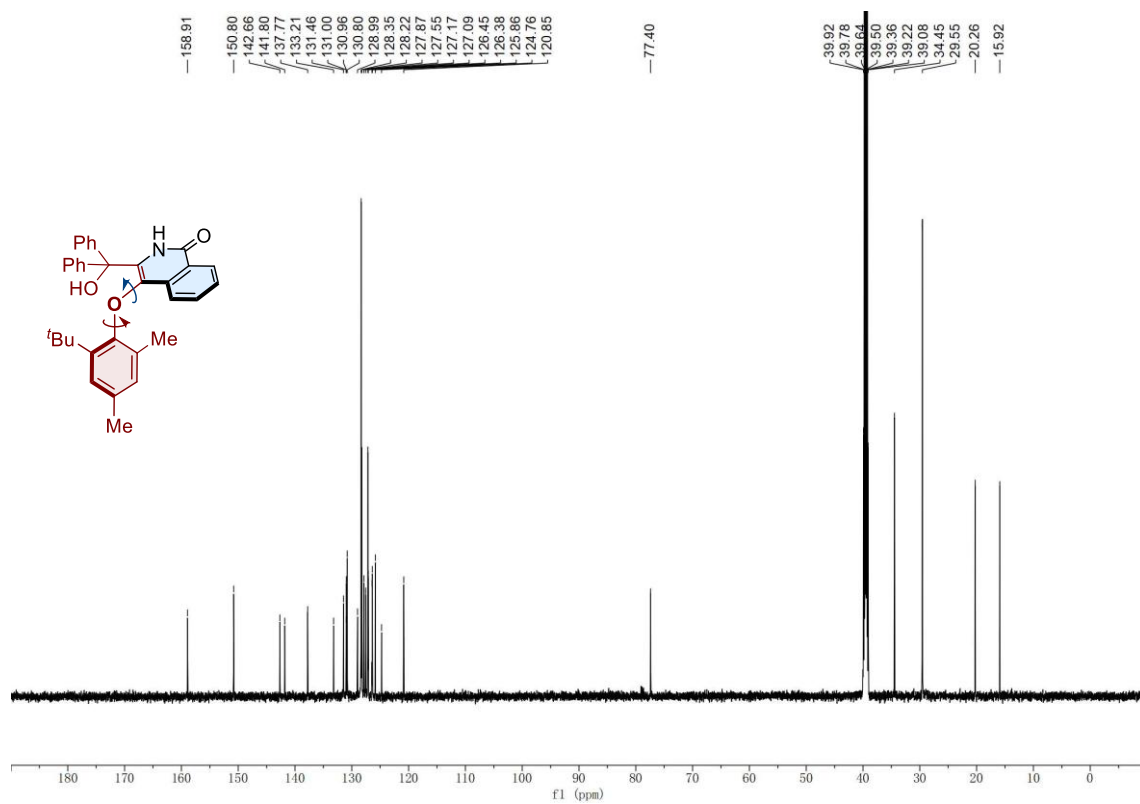

<sup>13</sup>C NMR spectrum of 3zl (151 MHz, CDCl<sub>3</sub>)

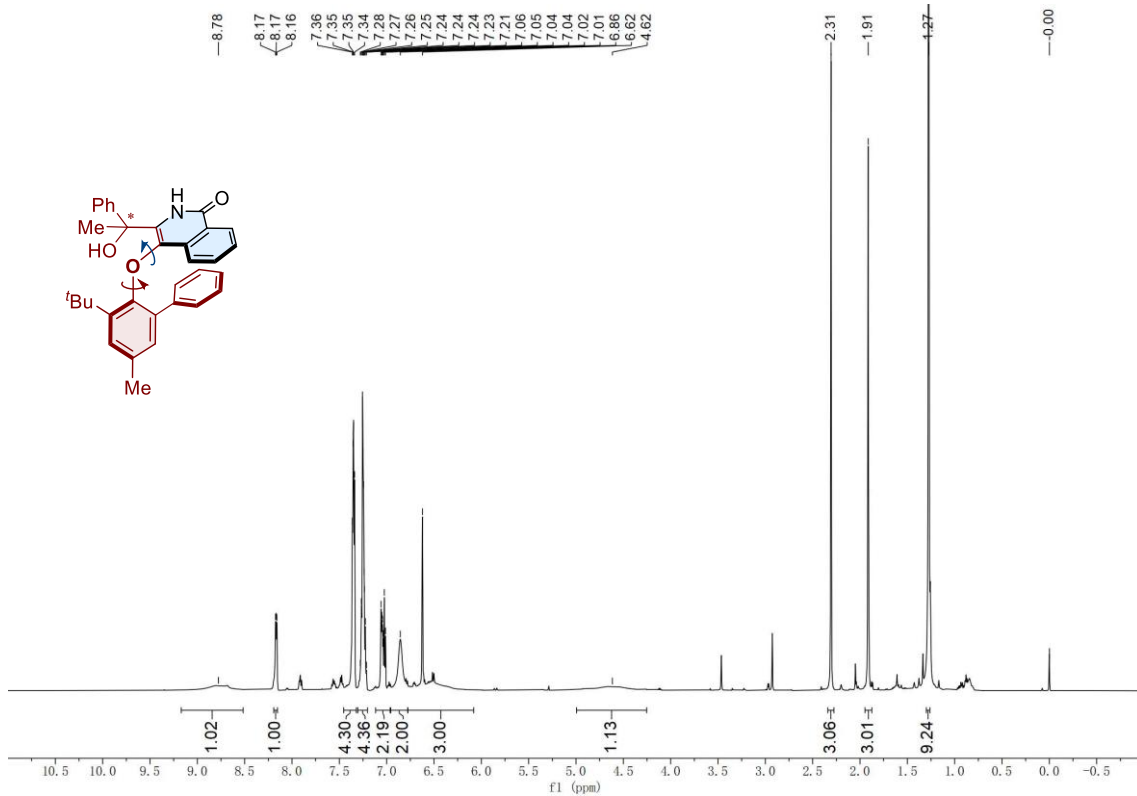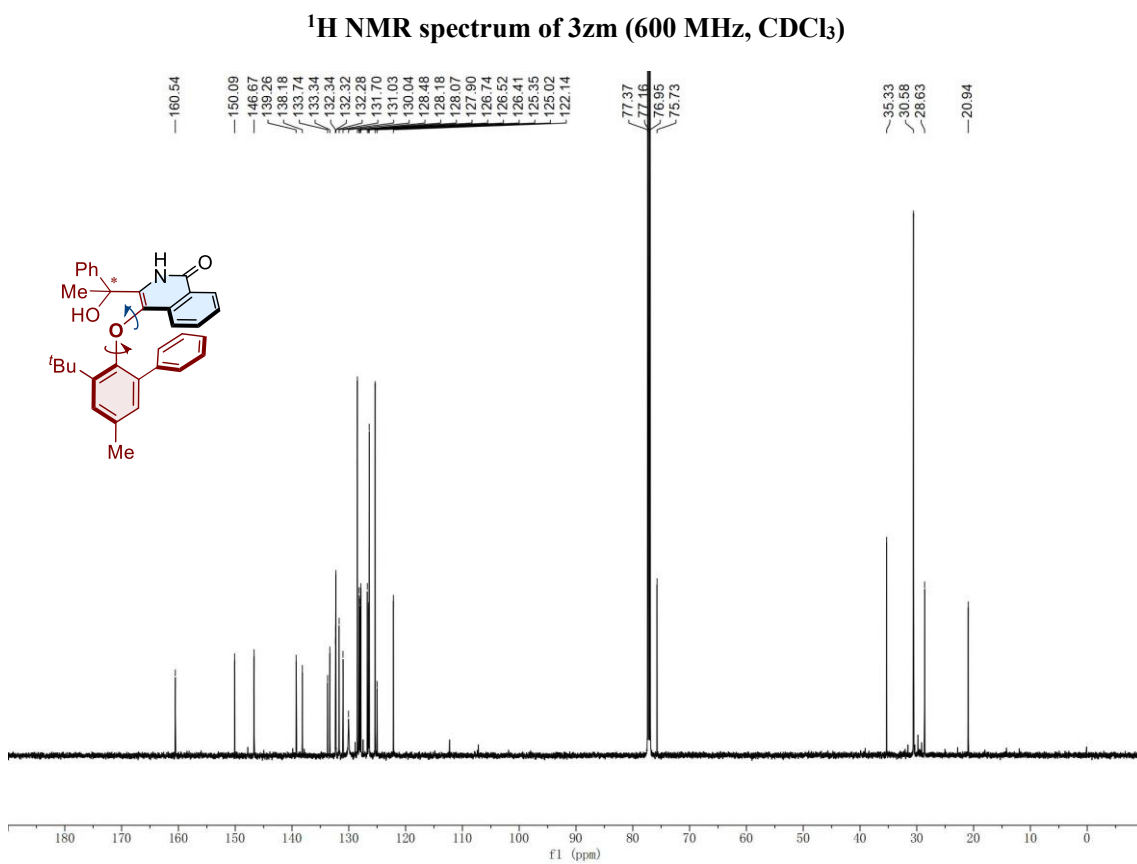

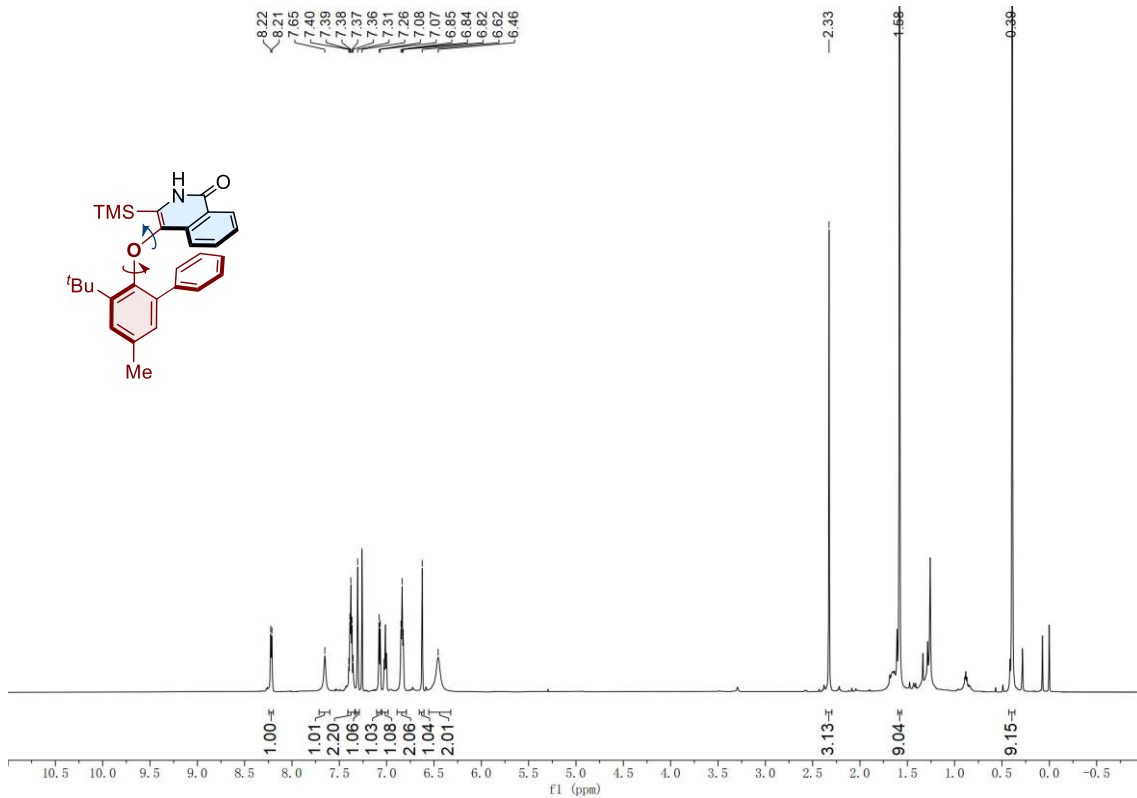

**<sup>1</sup>H NMR spectrum of 3zn (600 MHz, CDCl<sub>3</sub>)**

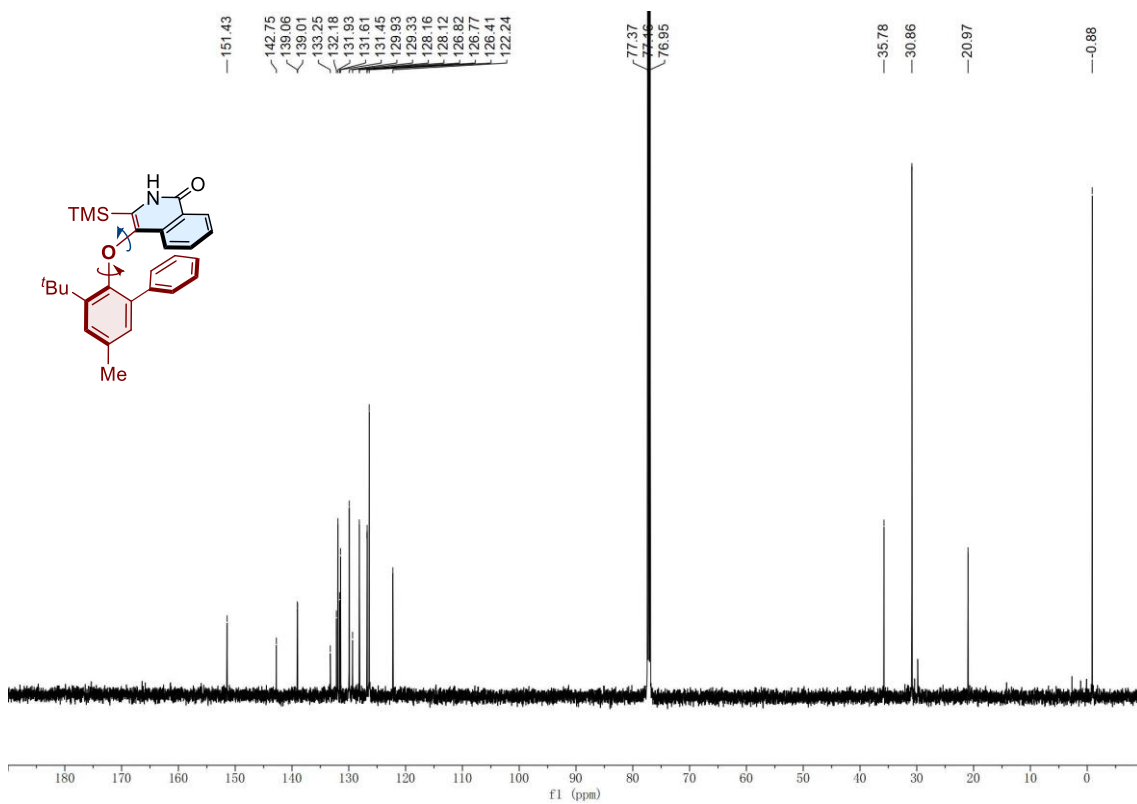

**<sup>13</sup>C NMR spectrum of 3zn (151 MHz, CDCl<sub>3</sub>)**

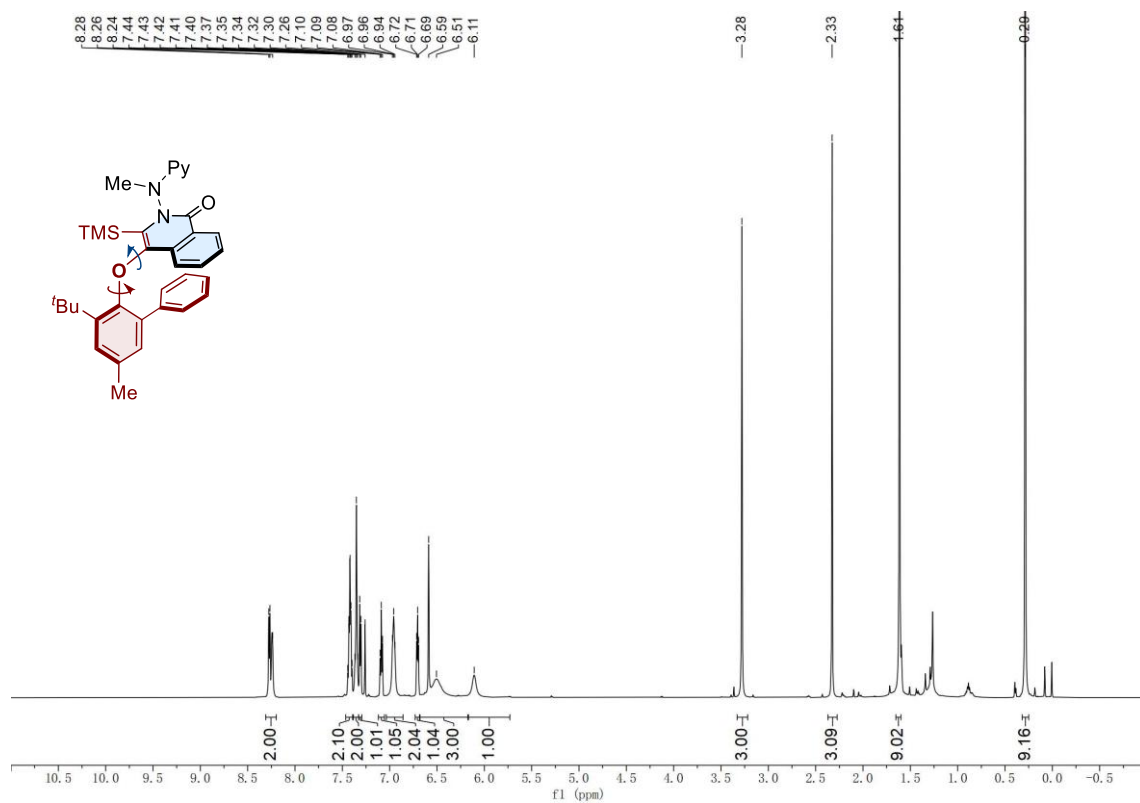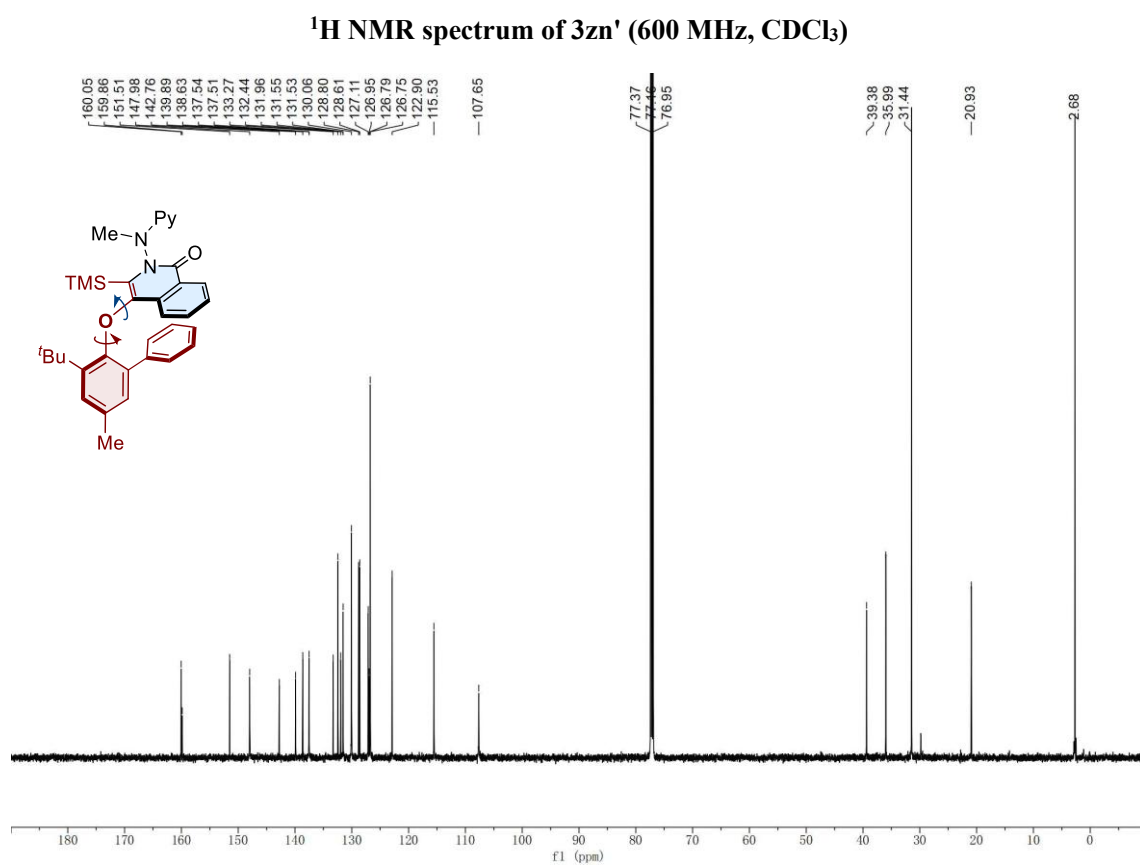

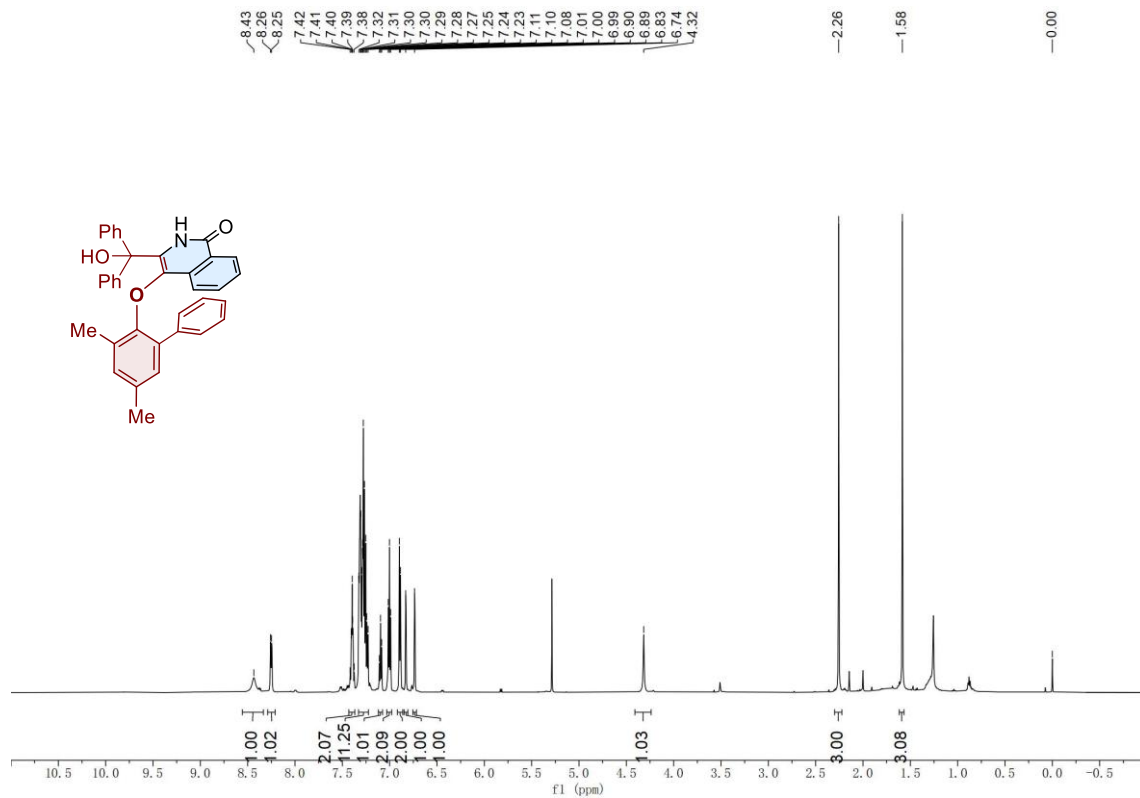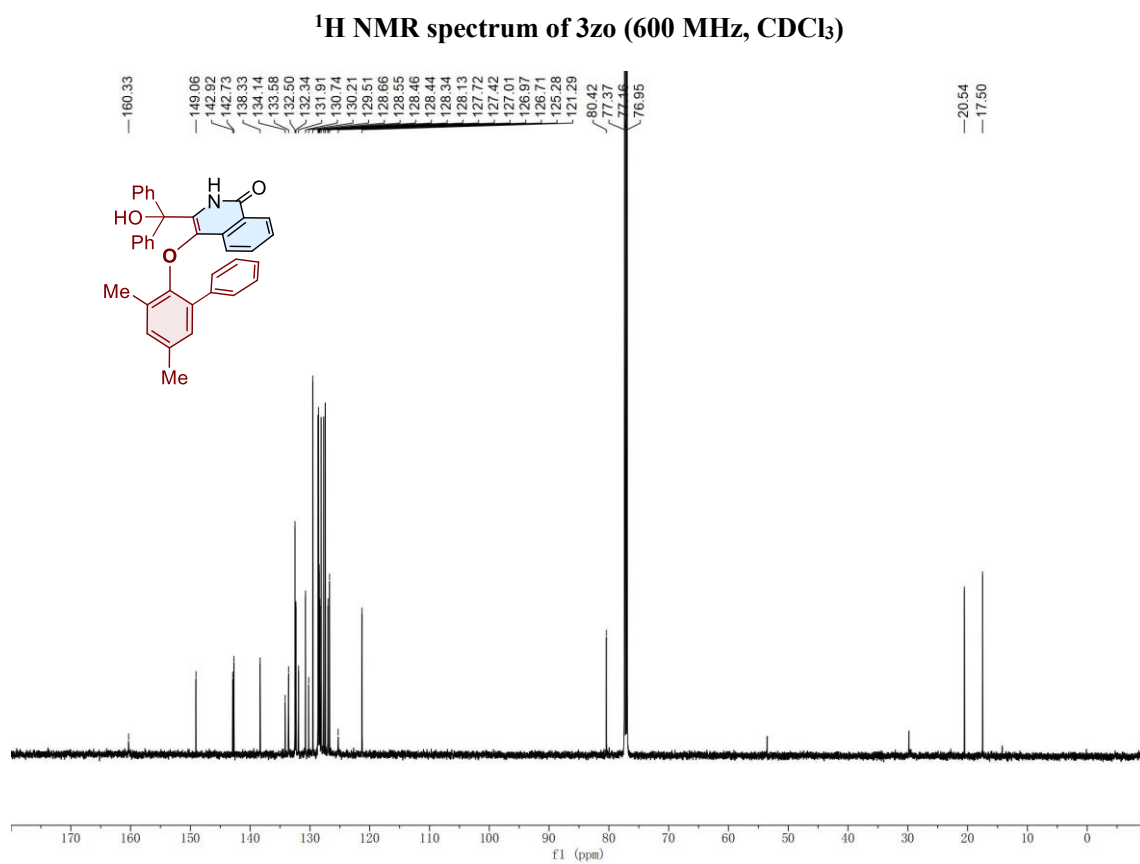

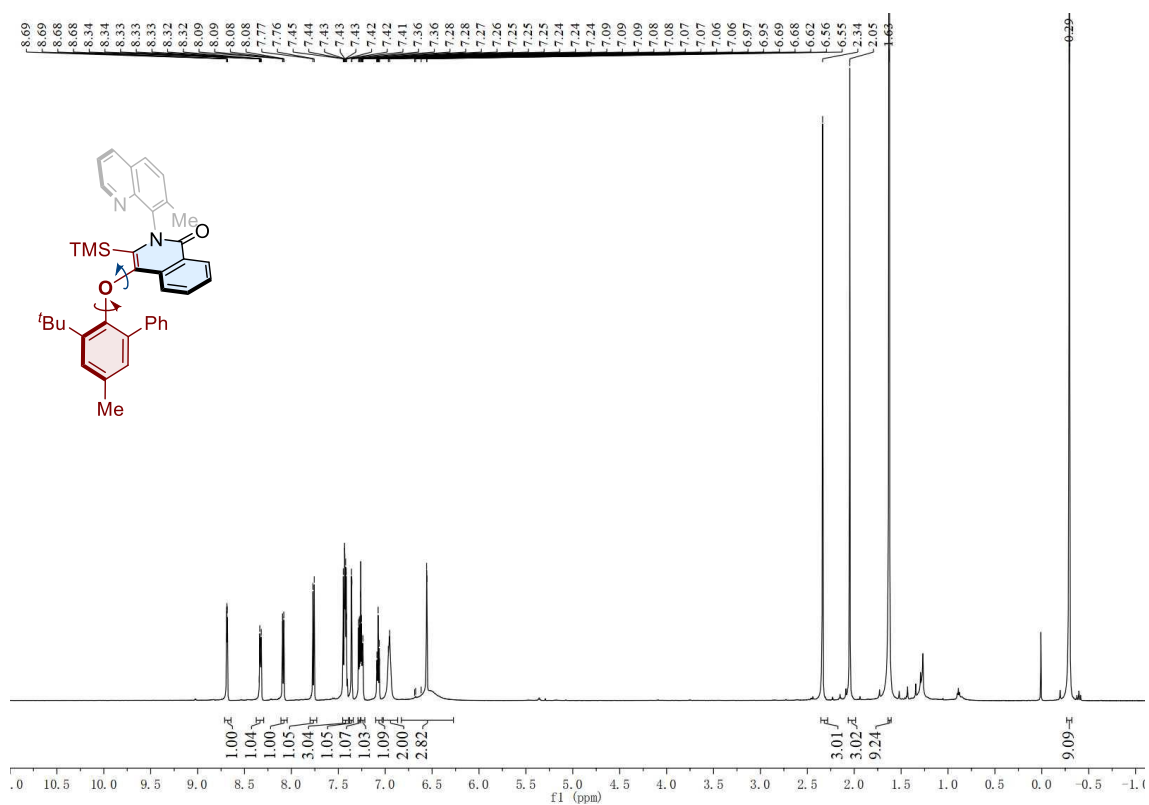

**<sup>1</sup>H NMR spectrum of 5a (600 MHz, CDCl<sub>3</sub>)**

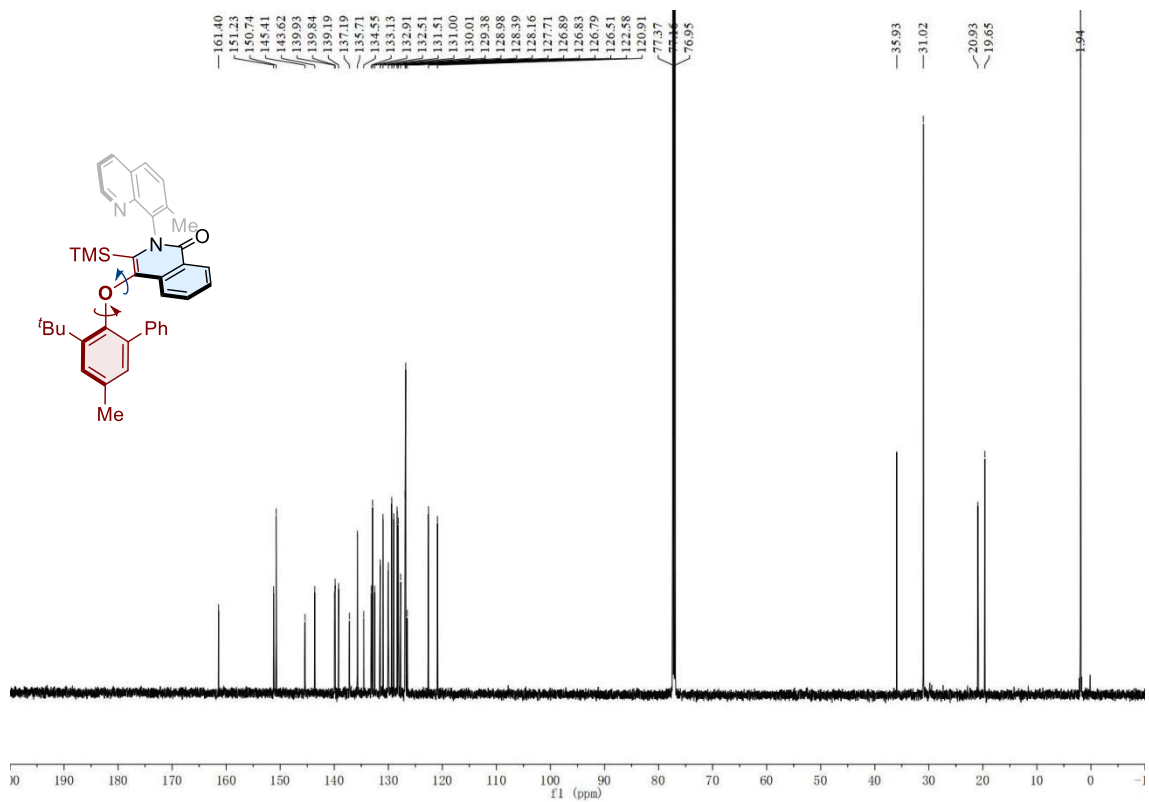

**<sup>13</sup>C NMR spectrum of 5a (151 MHz, CDCl<sub>3</sub>)**

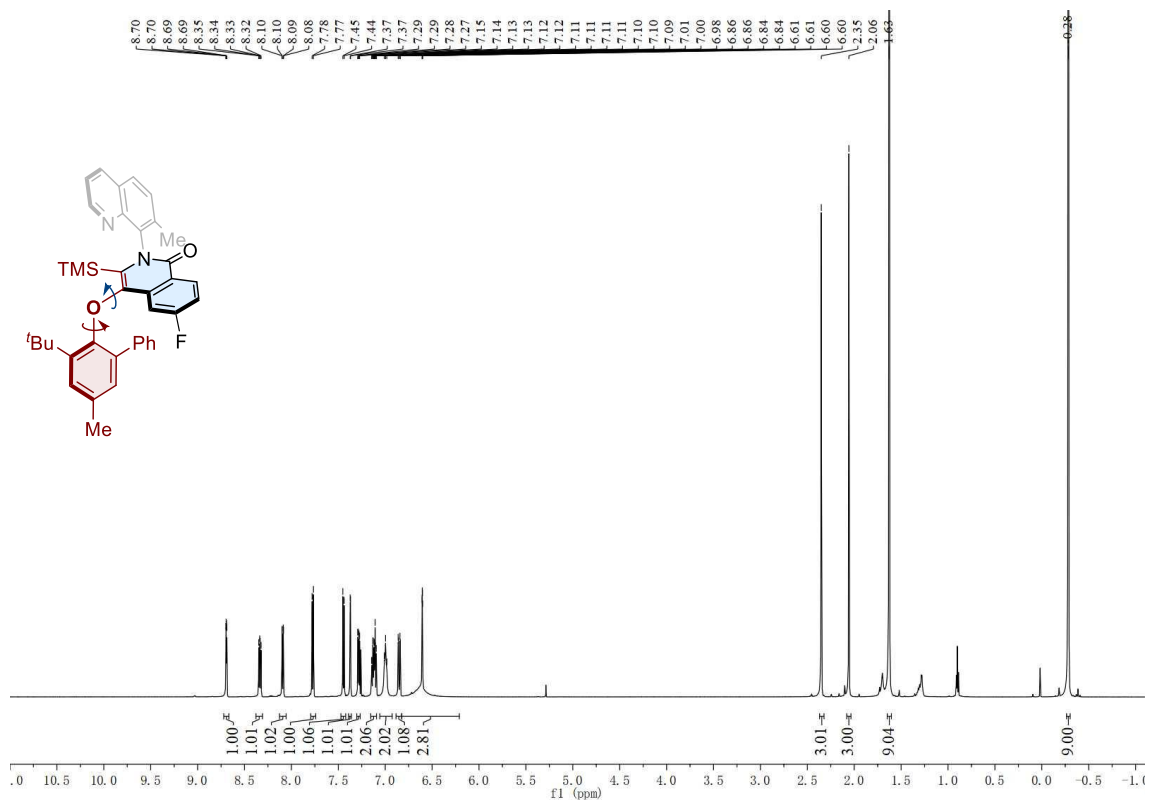

**<sup>1</sup>H NMR spectrum of 5b (600 MHz, CDCl<sub>3</sub>)**

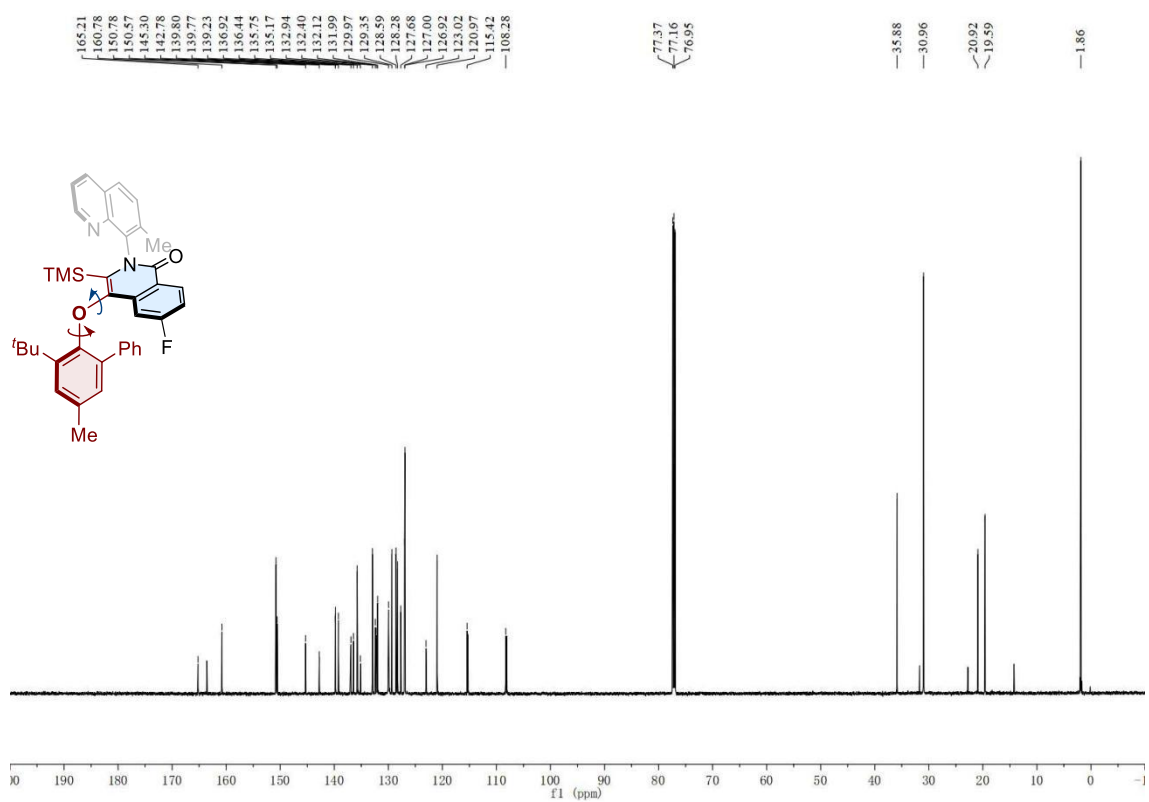

**<sup>13</sup>C NMR spectrum of 5b (151 MHz, CDCl<sub>3</sub>)**

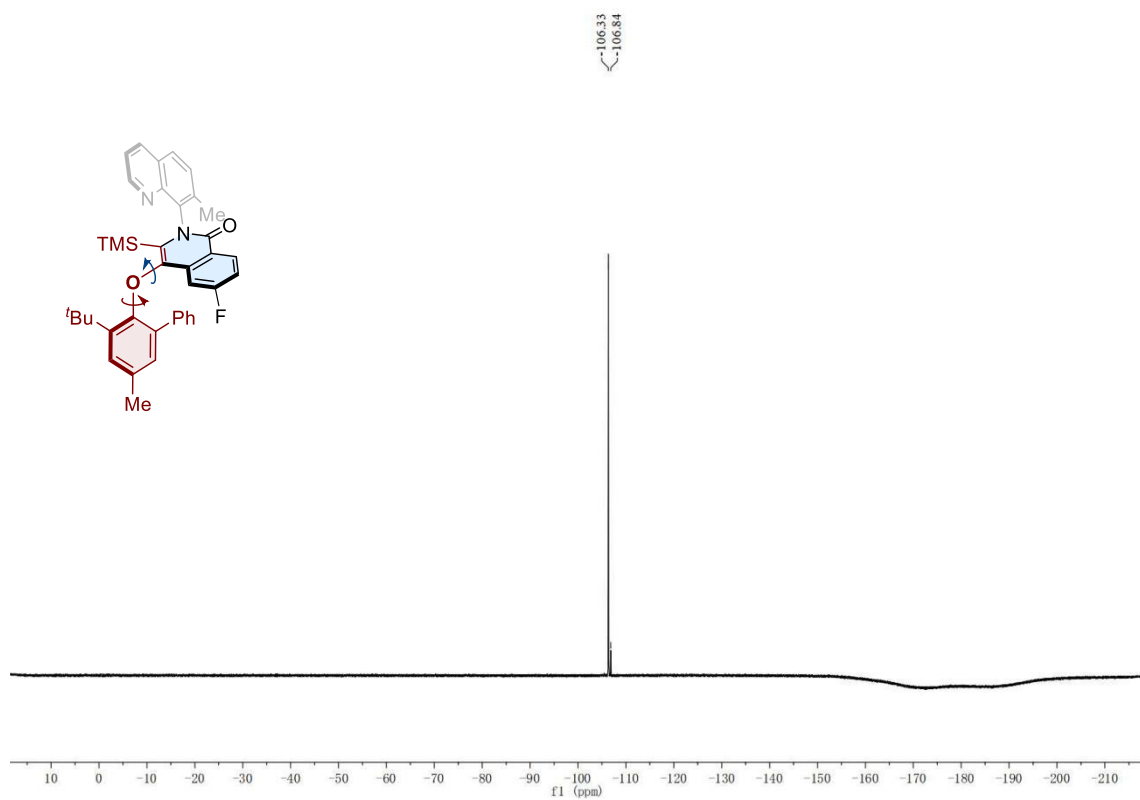

$^{19}\text{F}$  NMR spectrum of **5b** (565 MHz,  $\text{CDCl}_3$ )

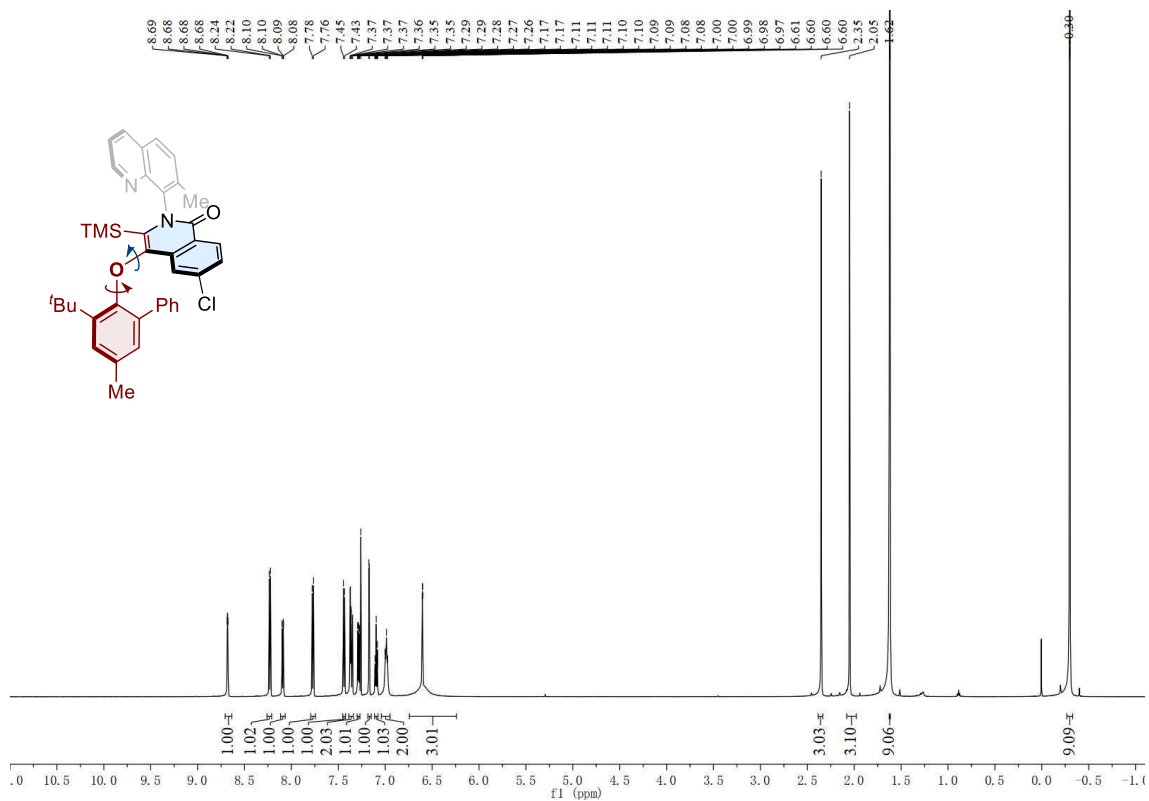

**<sup>1</sup>H NMR spectrum of 5c (600 MHz, CDCl<sub>3</sub>)**

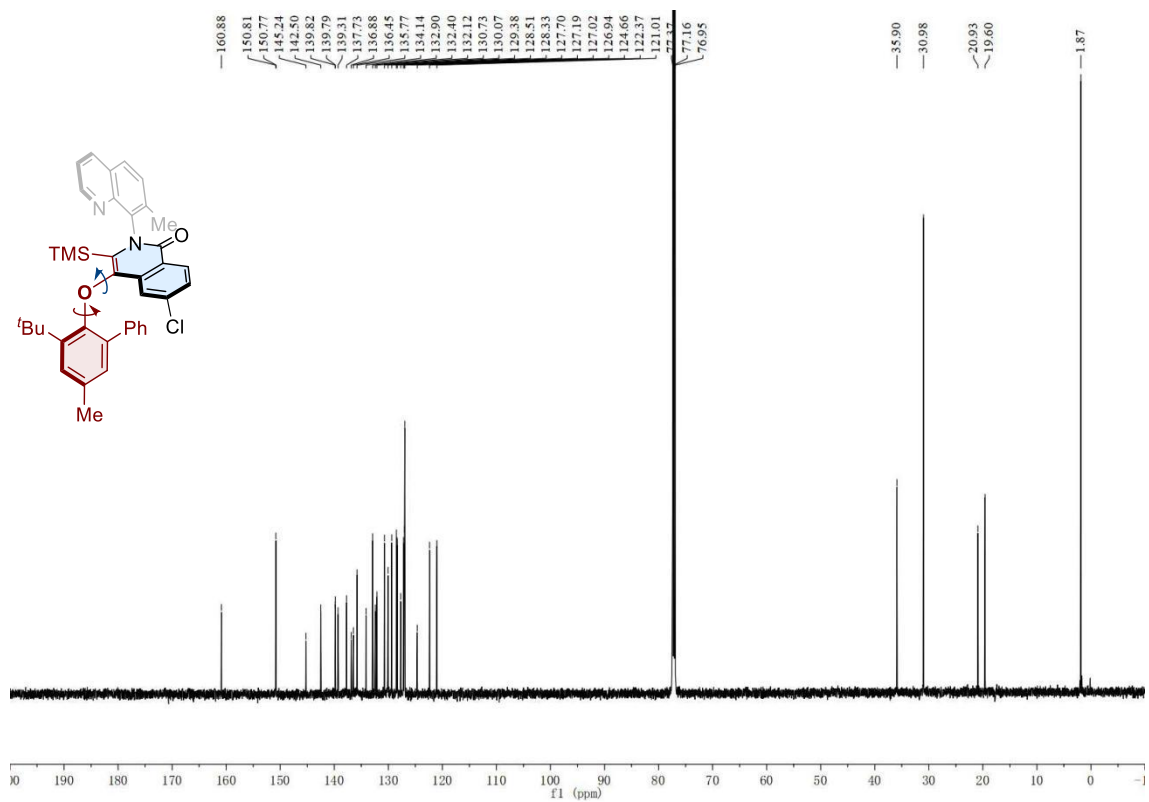

**<sup>13</sup>C NMR spectrum of 5c (151 MHz, CDCl<sub>3</sub>)**

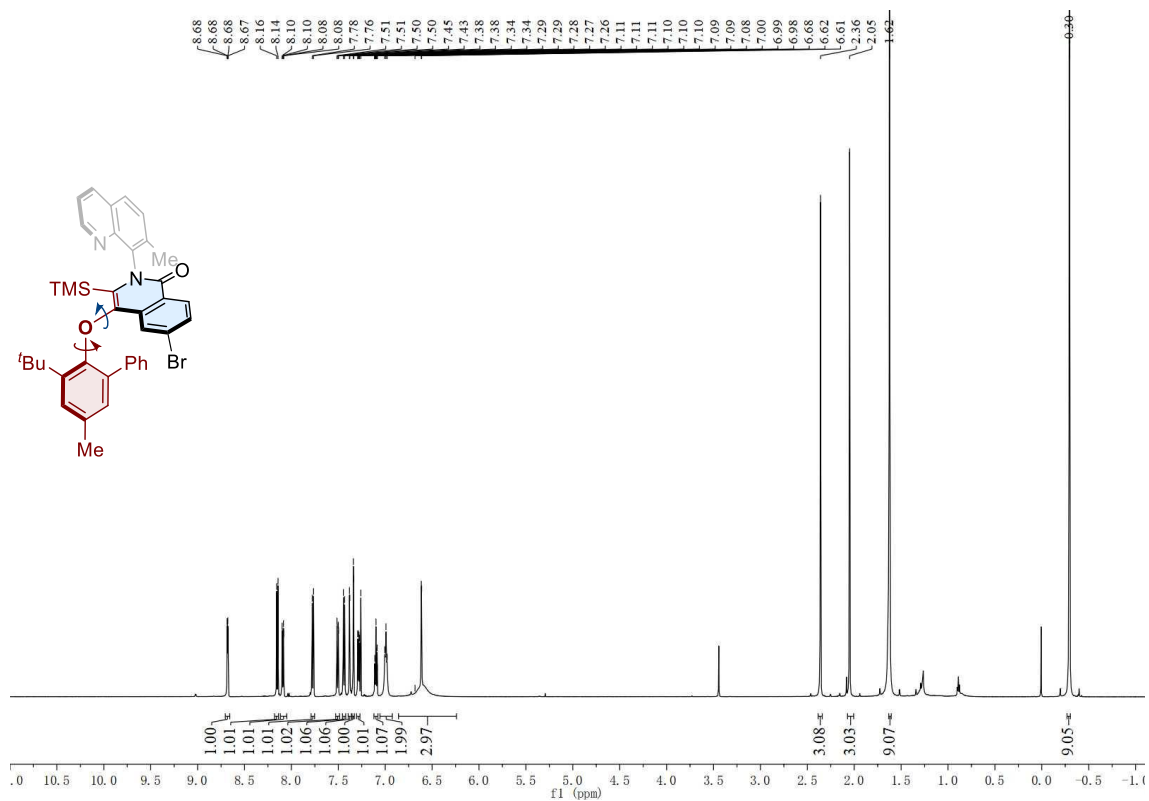

**<sup>1</sup>H NMR spectrum of 5d (600 MHz, CDCl<sub>3</sub>)**

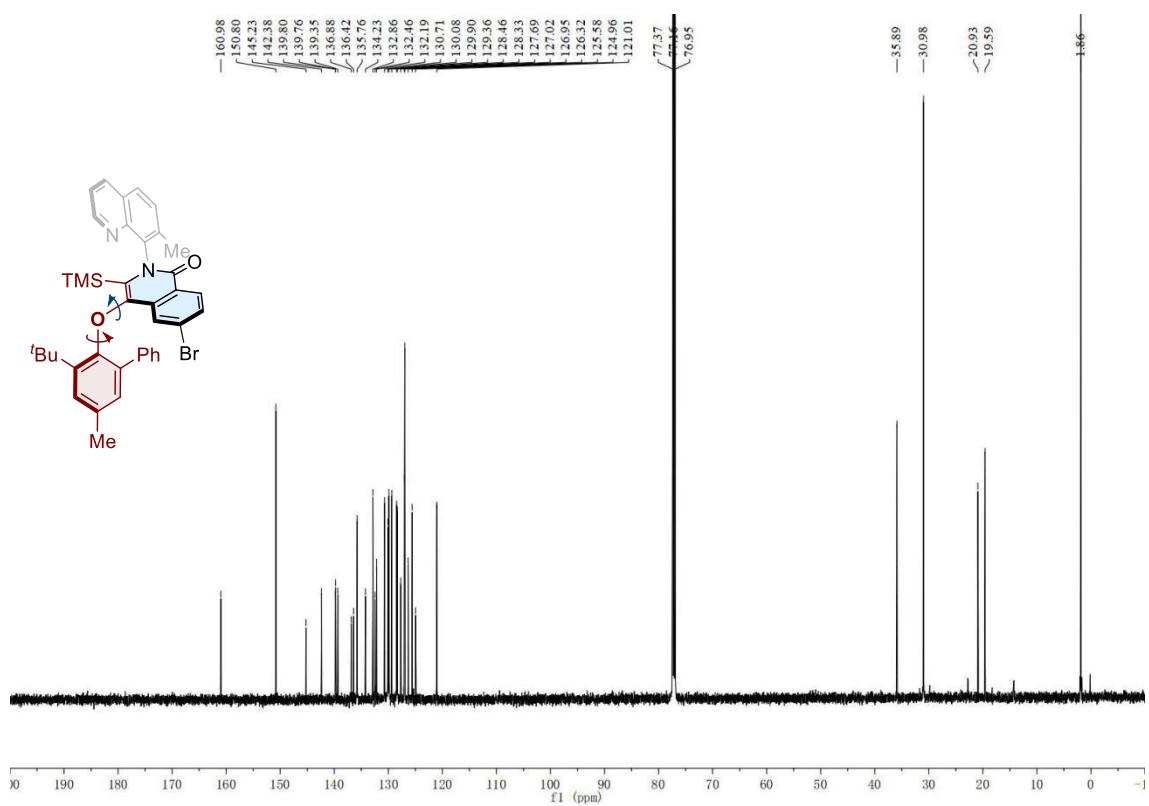

**<sup>13</sup>C NMR spectrum of 5d (151 MHz, CDCl<sub>3</sub>)**

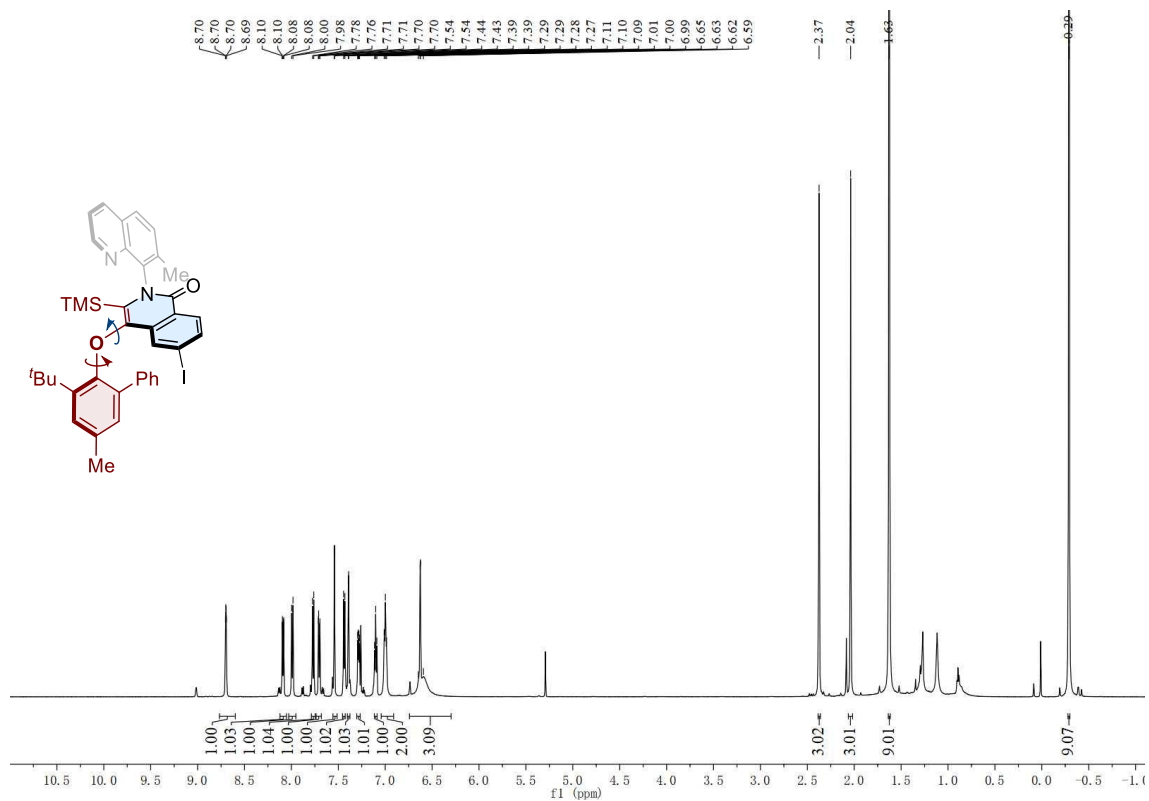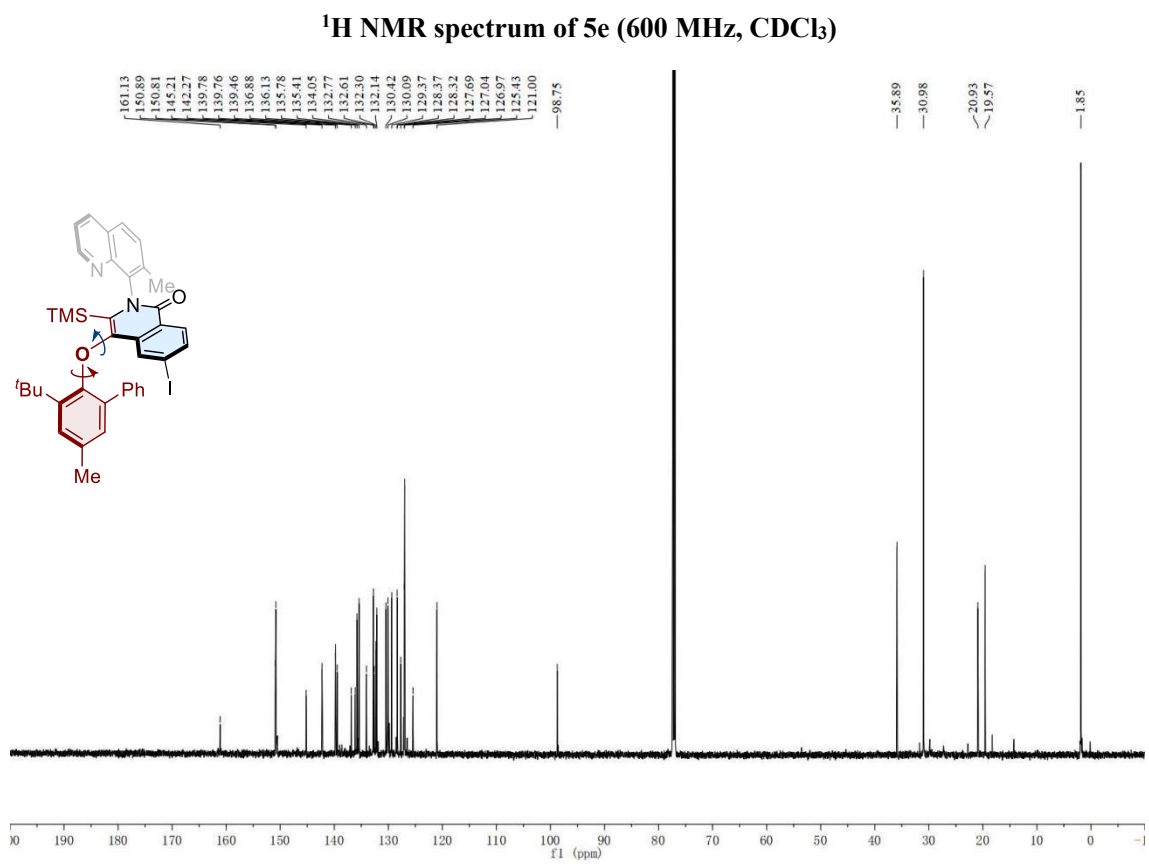

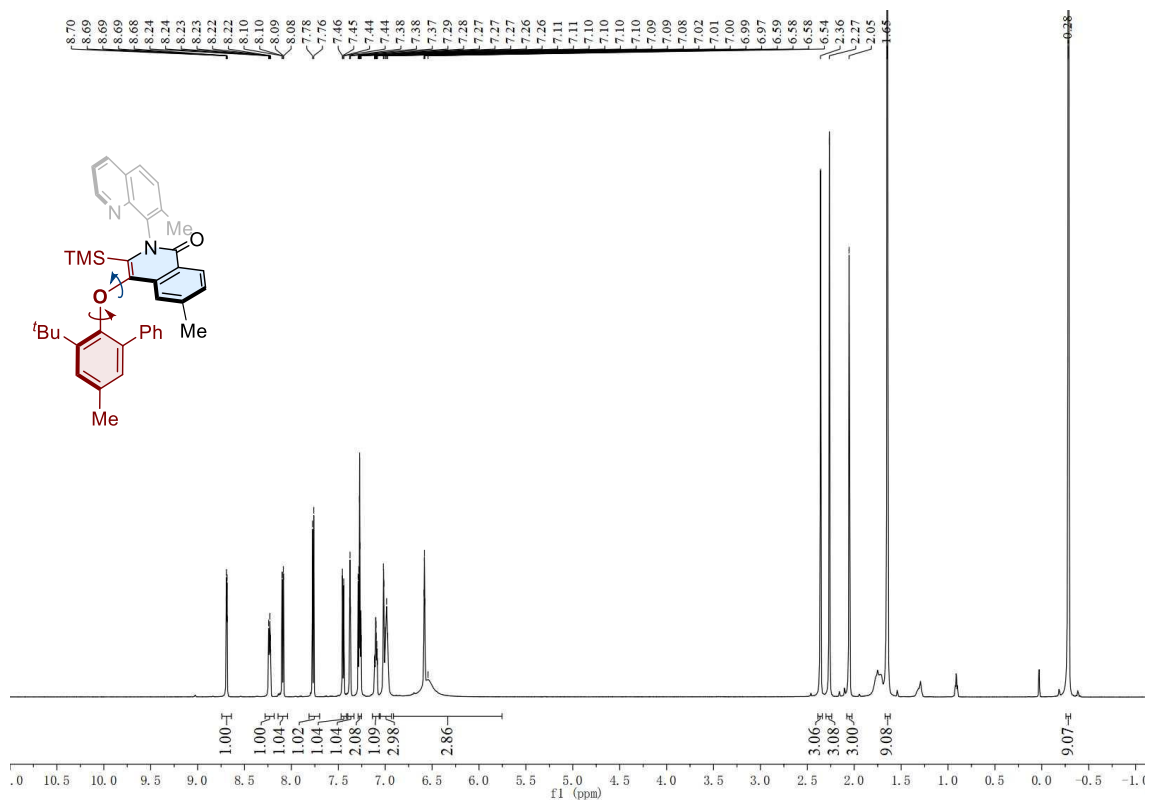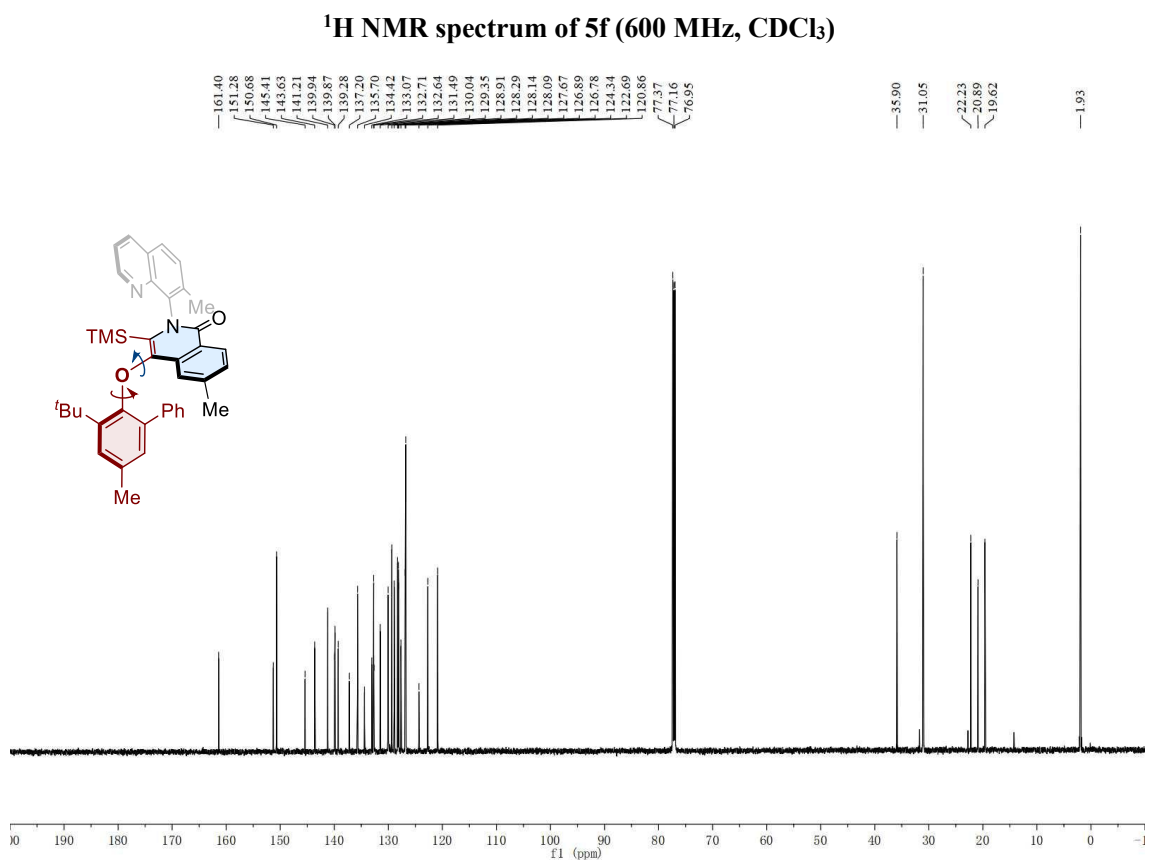

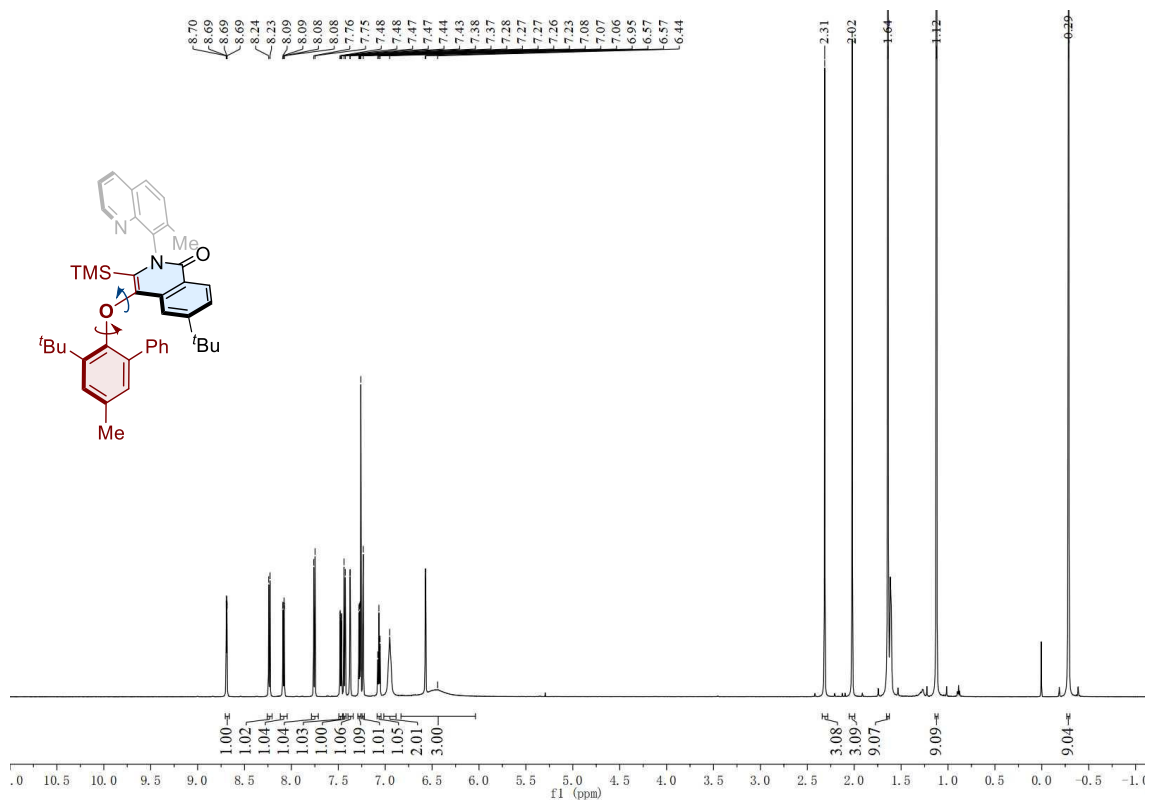

**<sup>1</sup>H NMR spectrum of 5g (600 MHz, CDCl<sub>3</sub>)**

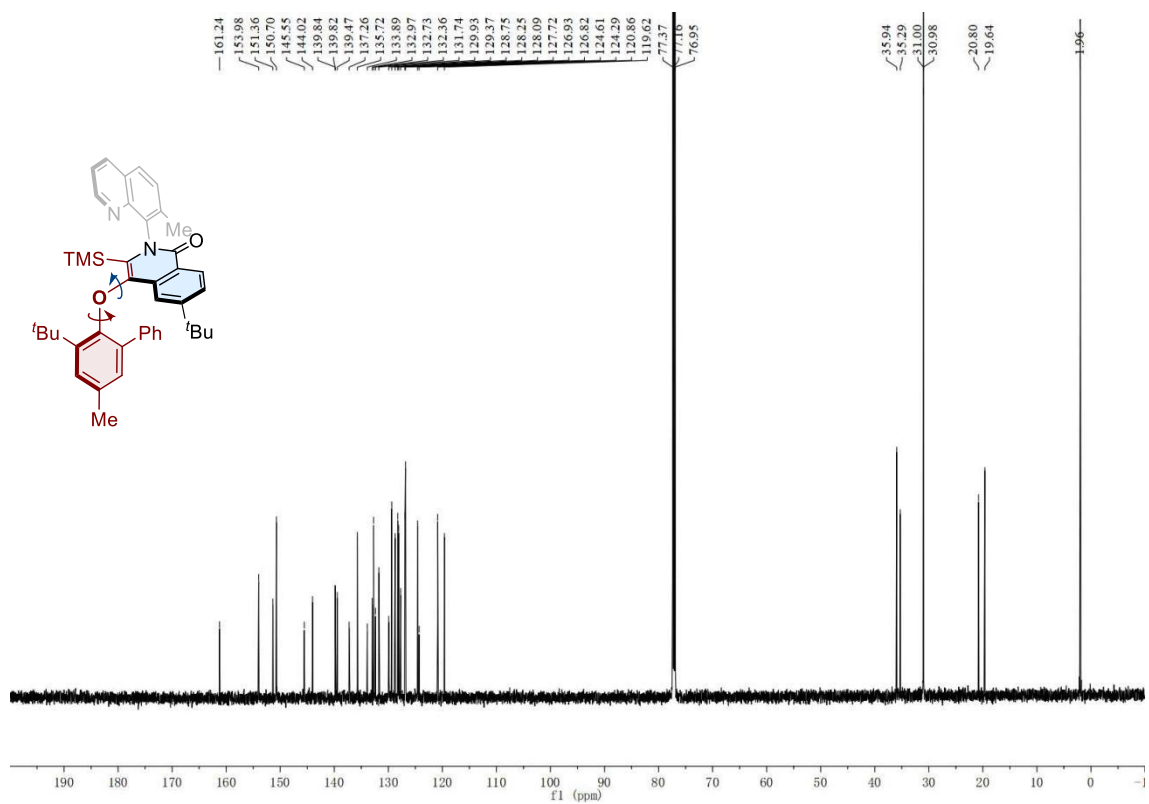

**<sup>13</sup>C NMR spectrum of 5g (151 MHz, CDCl<sub>3</sub>)**

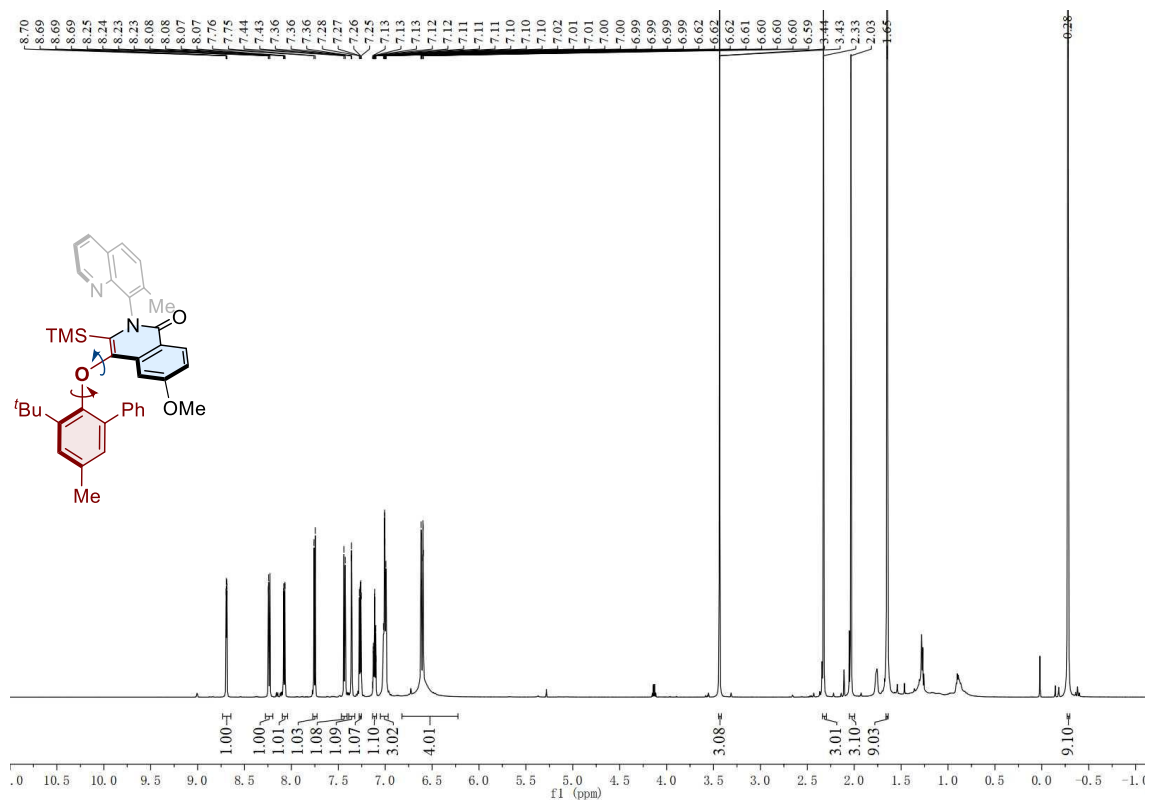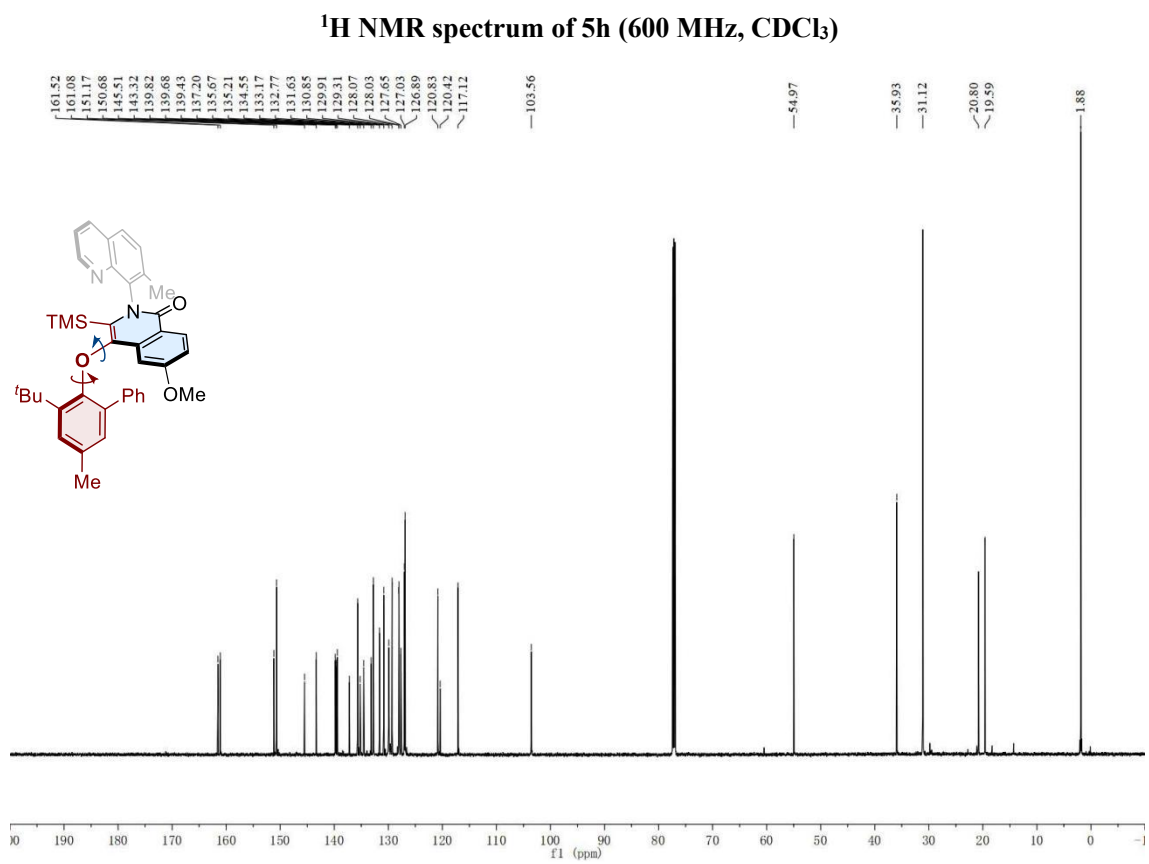

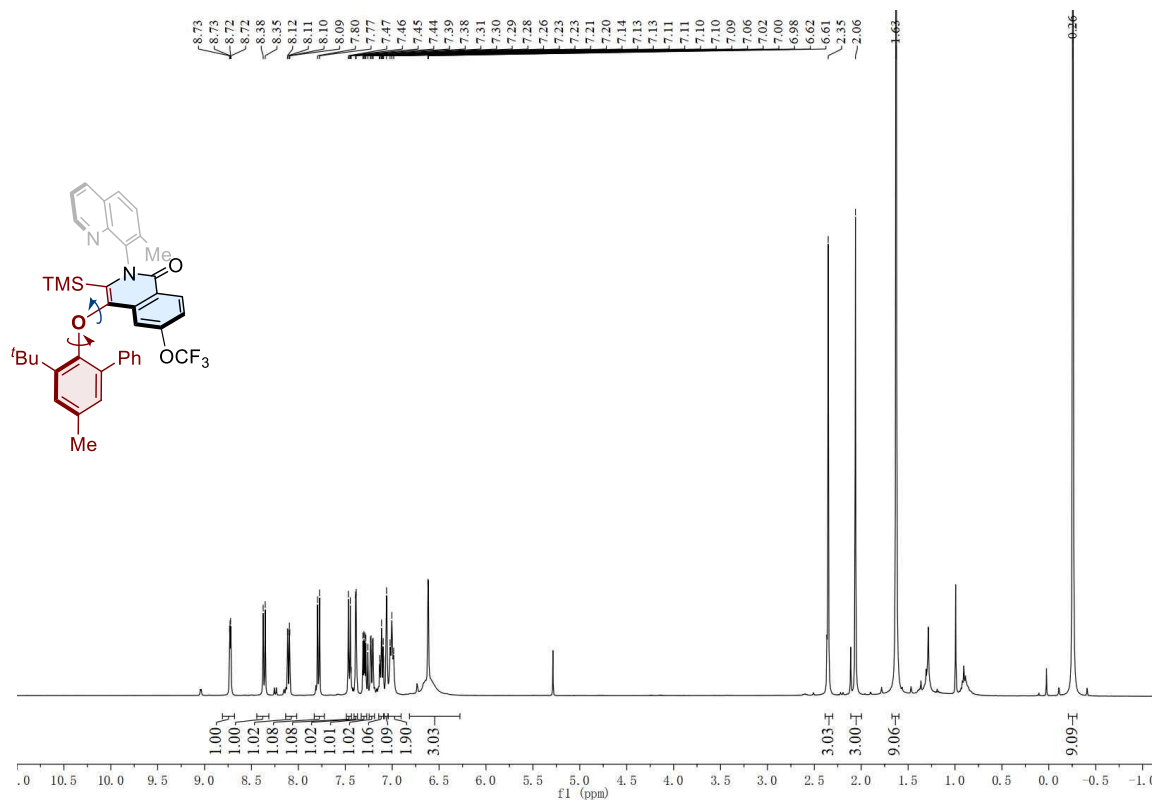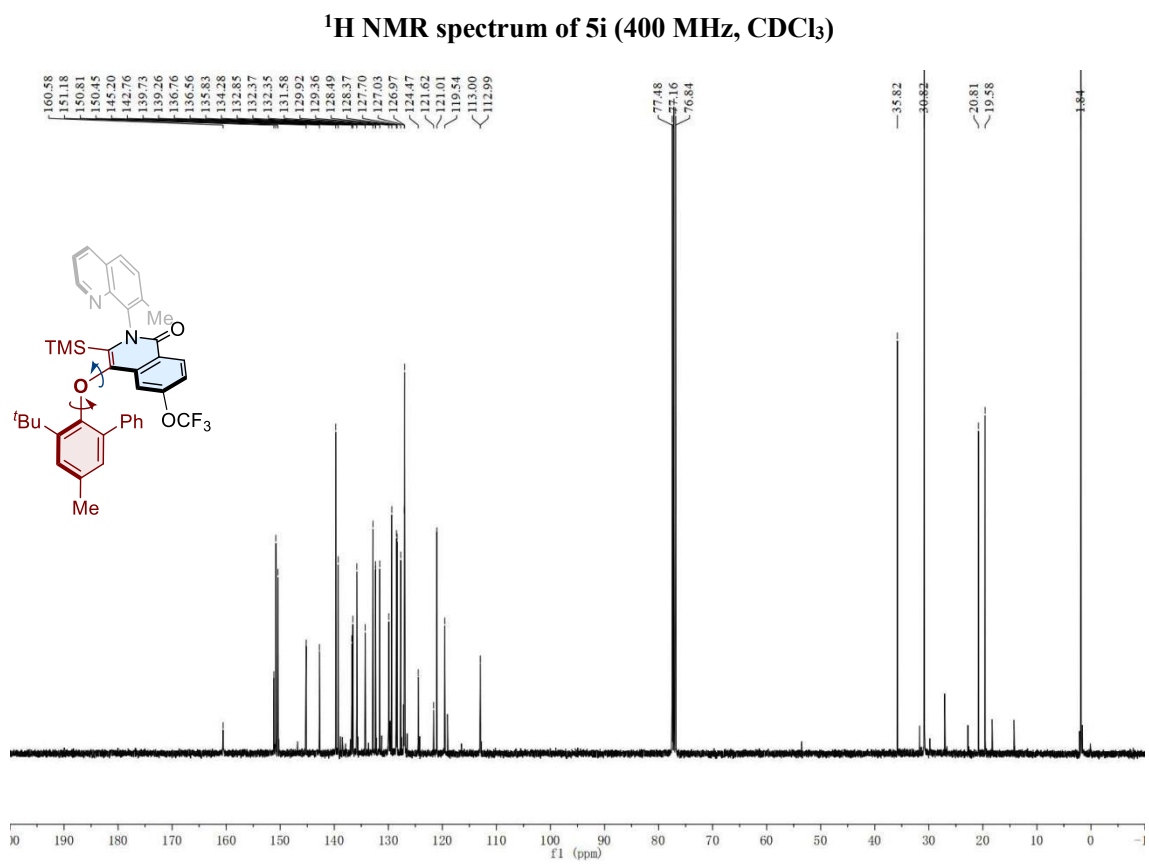

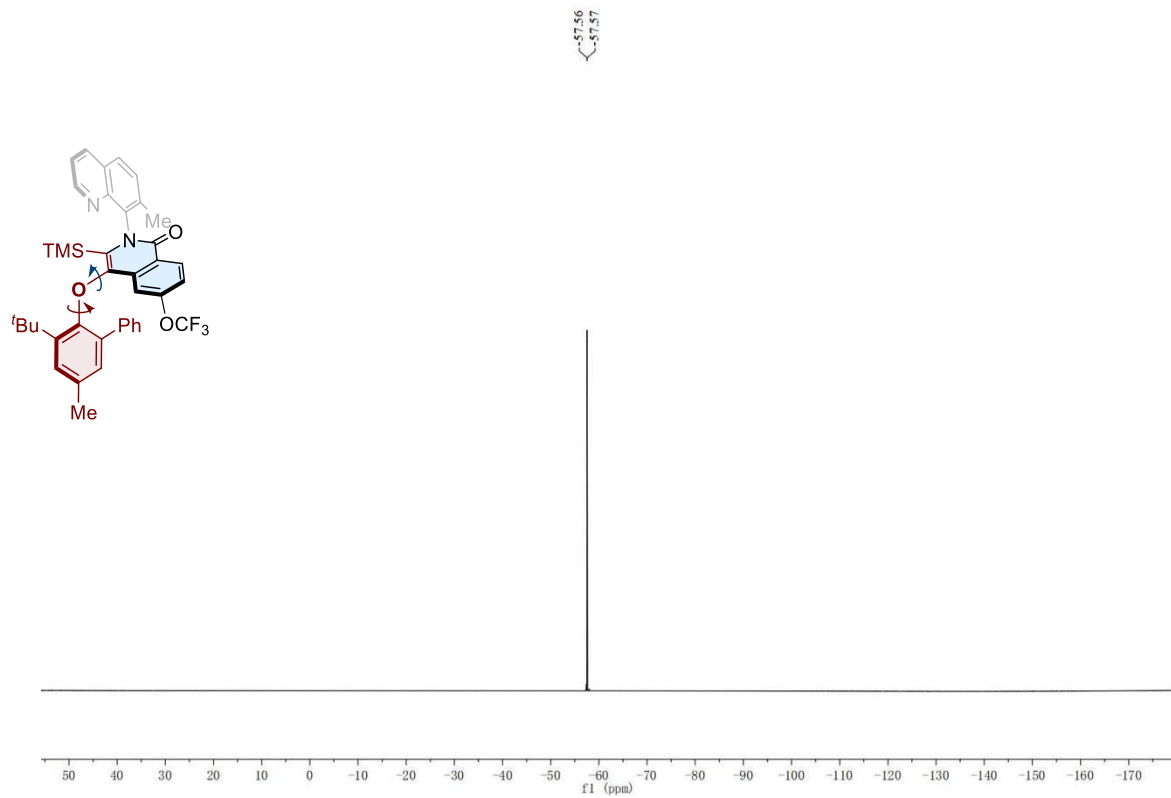

**$^{19}\text{F}$  NMR spectrum of 5i (377 MHz,  $\text{CDCl}_3$ )**

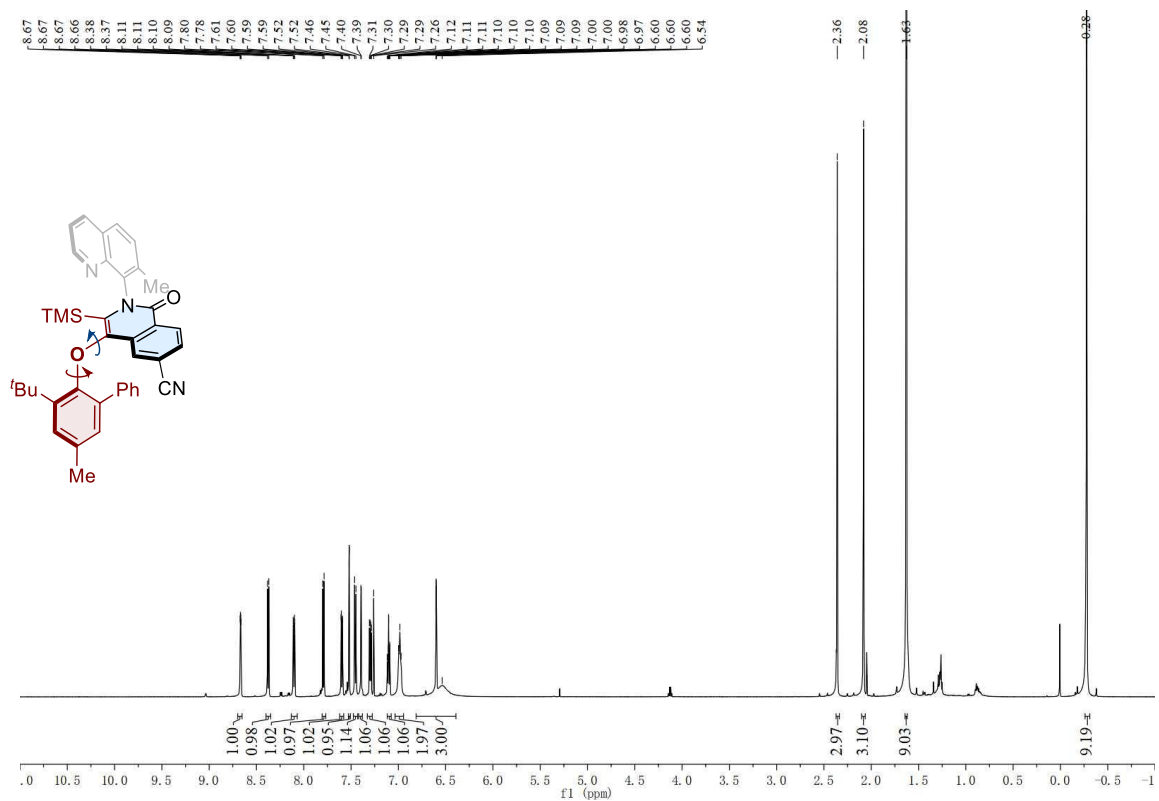

**<sup>1</sup>H NMR spectrum of 5j (600 MHz, CDCl<sub>3</sub>)**

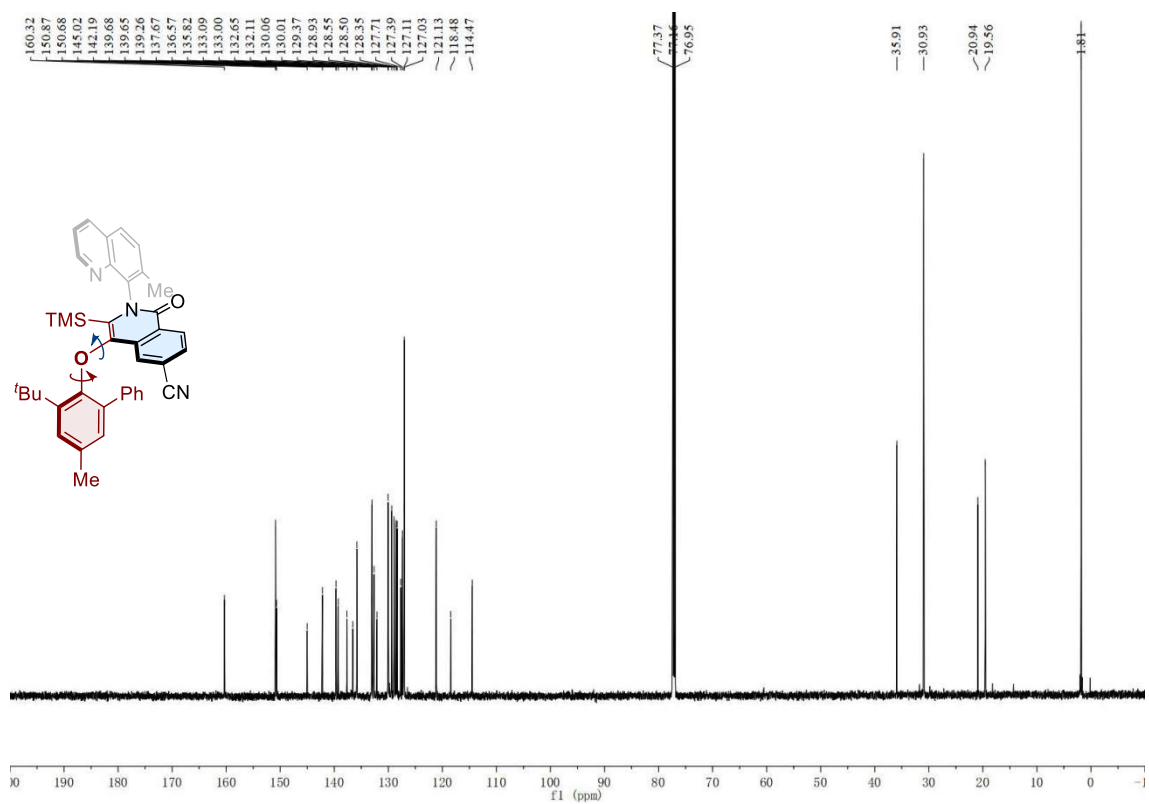

**<sup>13</sup>C NMR spectrum of 5j (151 MHz, CDCl<sub>3</sub>)**

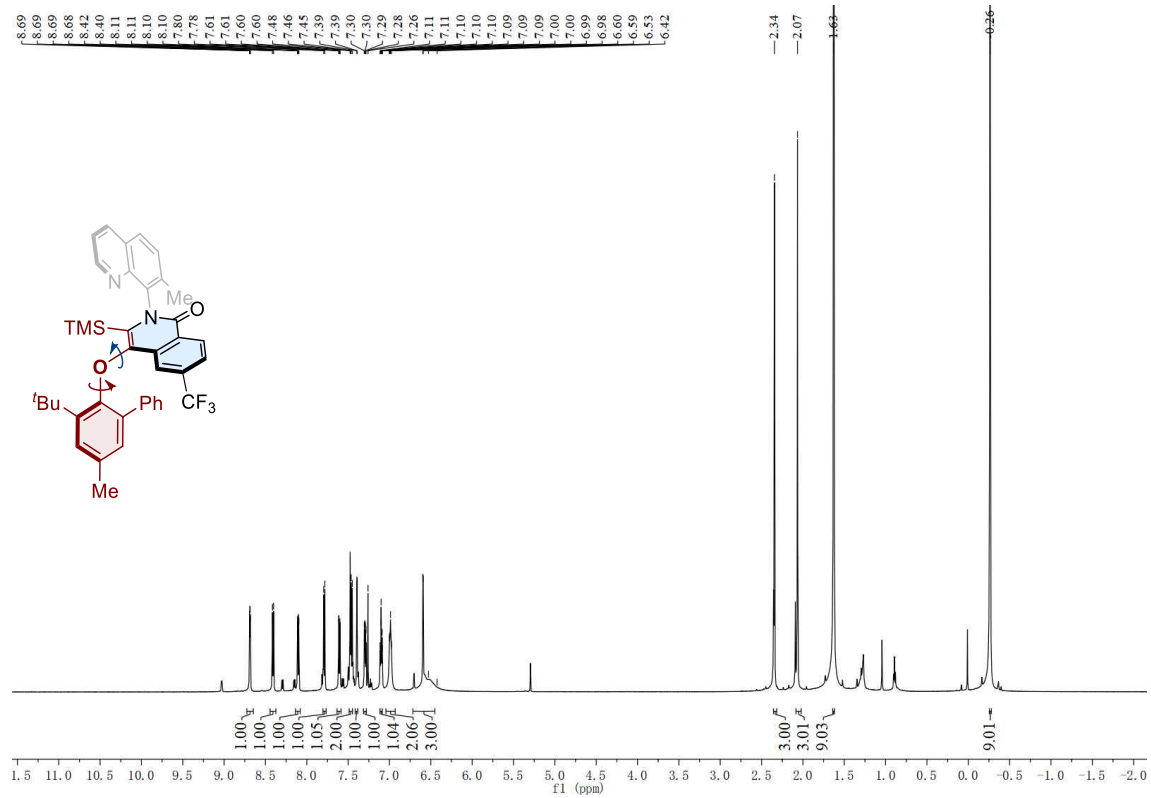

**<sup>1</sup>H NMR spectrum of 5k (600 MHz, CDCl<sub>3</sub>)**

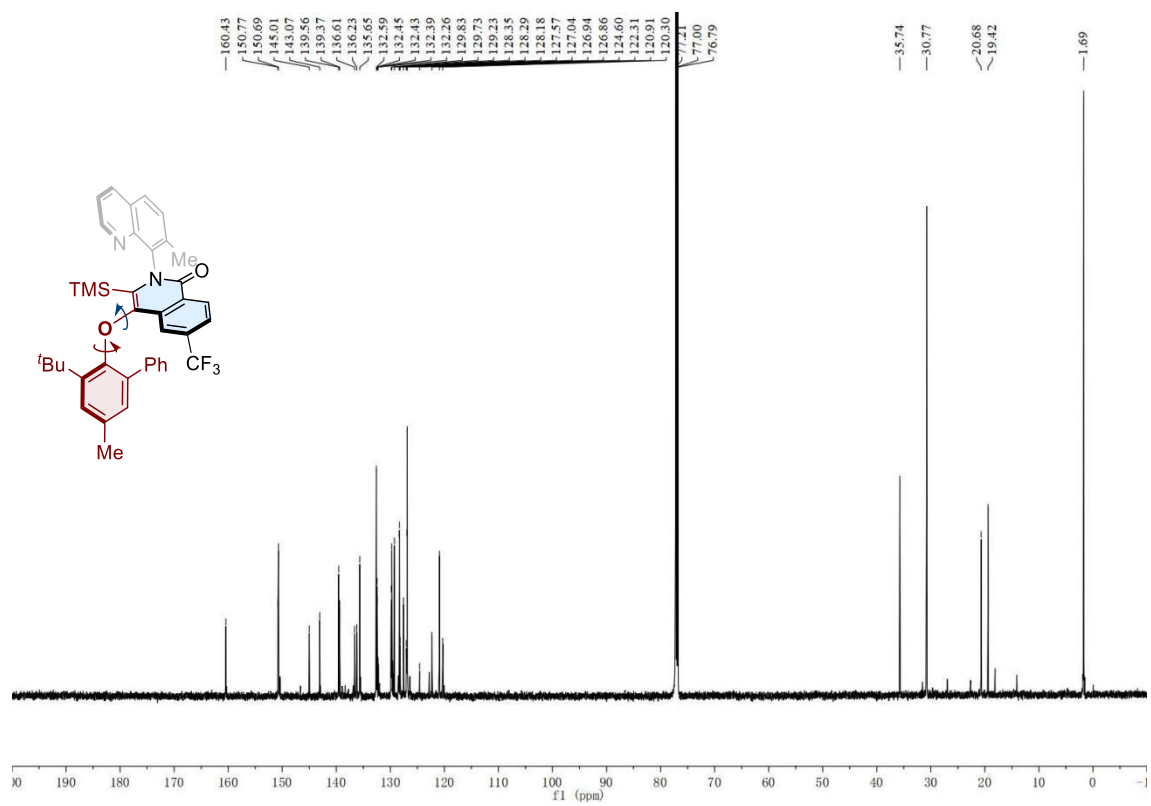

**<sup>13</sup>C NMR spectrum of 5k (151 MHz, CDCl<sub>3</sub>)**

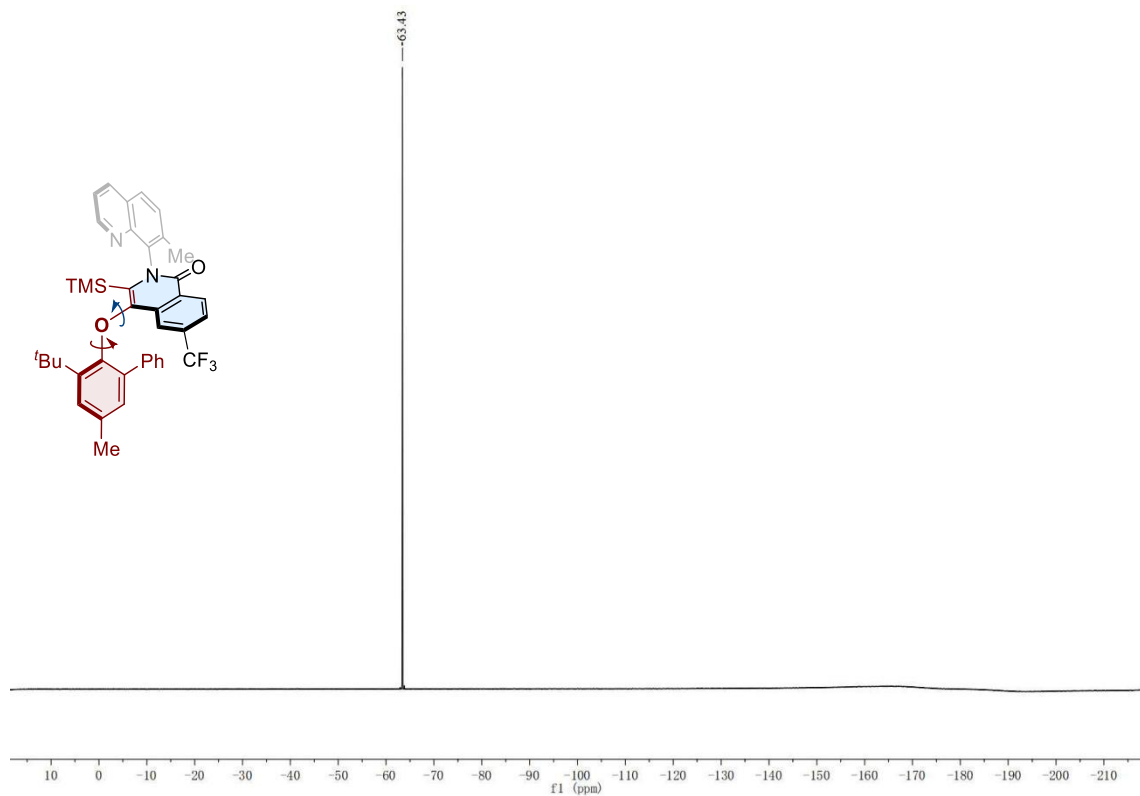

$^{19}\text{F}$  NMR spectrum of 5k (565 MHz,  $\text{CDCl}_3$ )



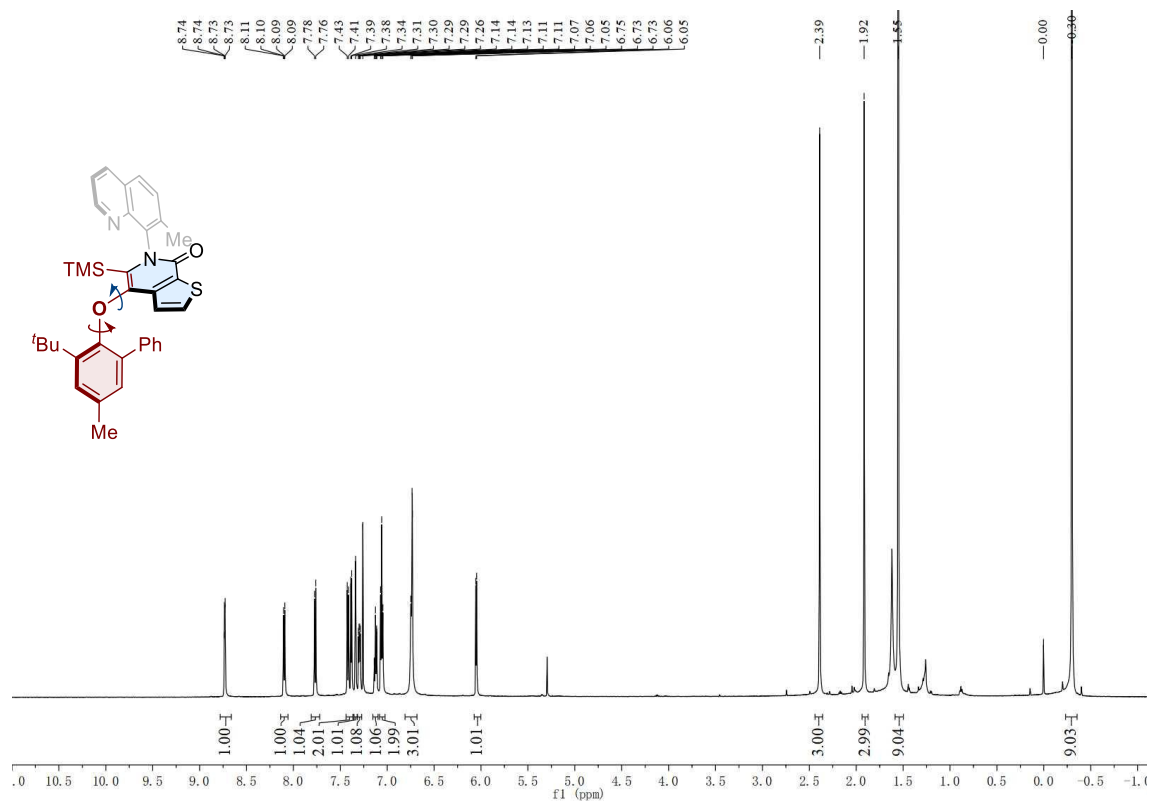

**<sup>1</sup>H NMR spectrum of 5m (600 MHz, CDCl<sub>3</sub>)**

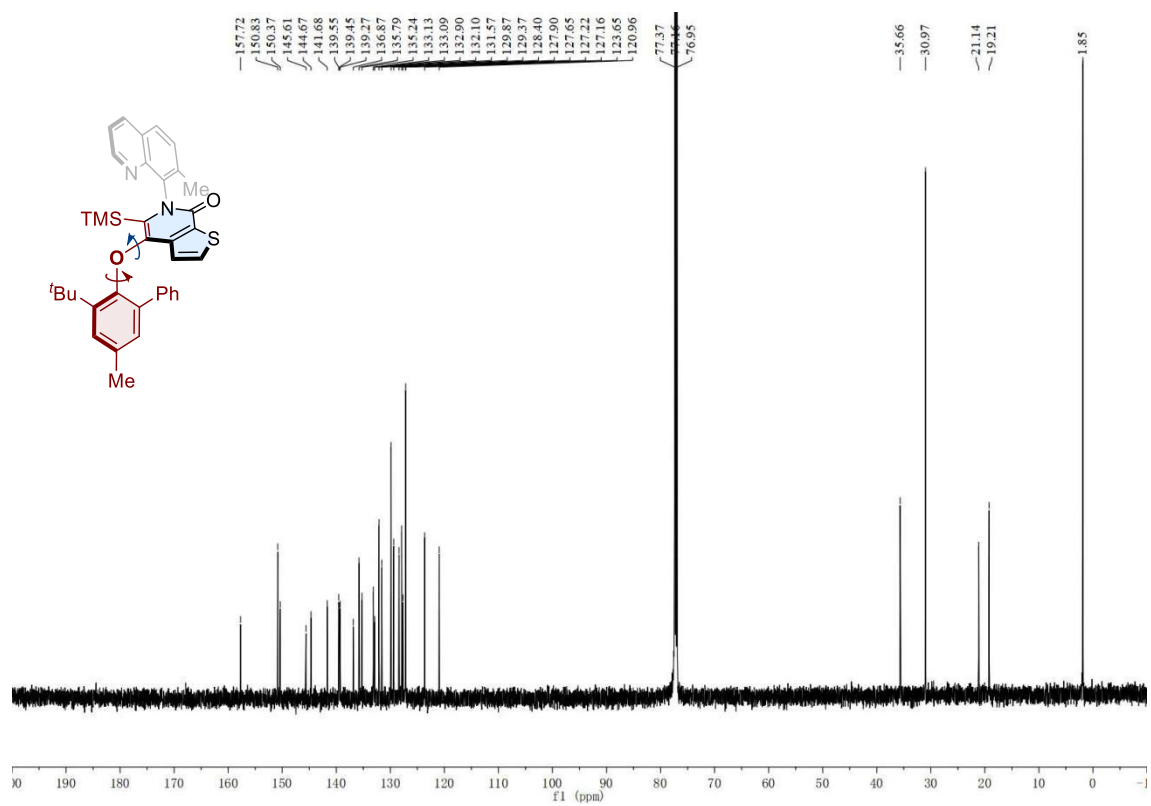

**<sup>13</sup>C NMR spectrum of 5m (151 MHz, CDCl<sub>3</sub>)**



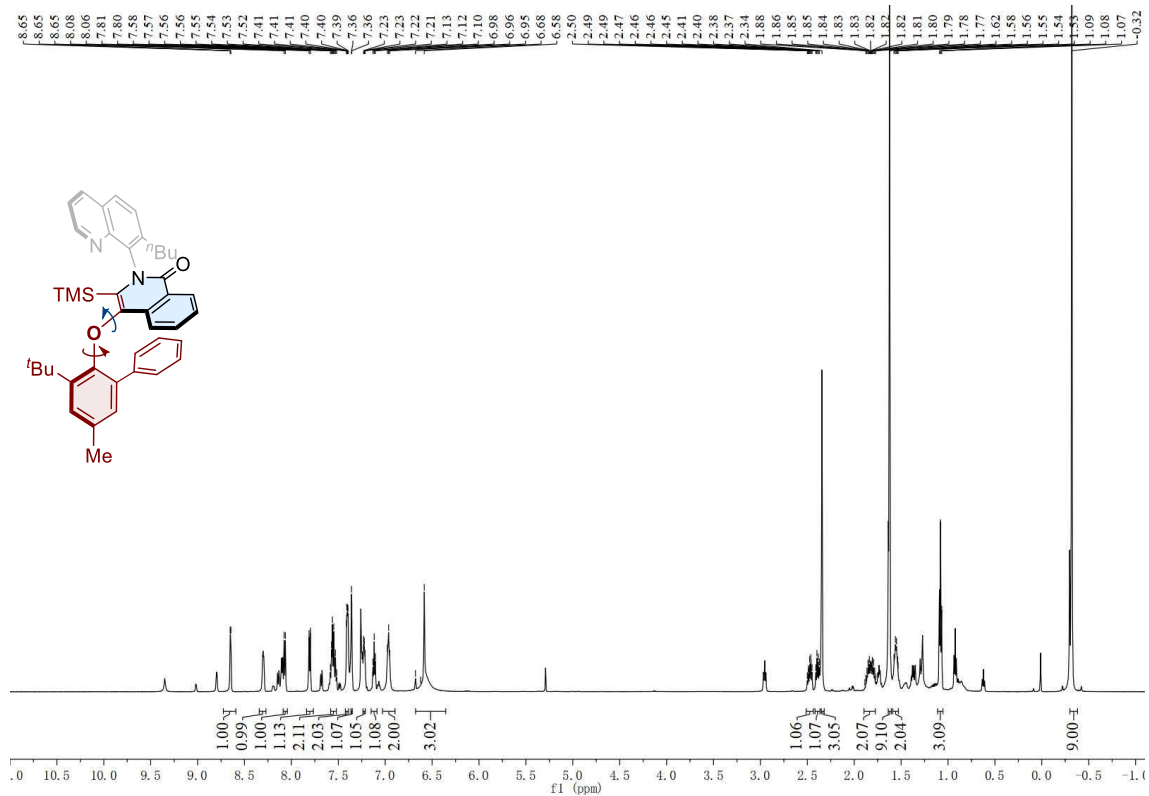

**<sup>1</sup>H NMR spectrum of 5o (600 MHz, CDCl<sub>3</sub>)**

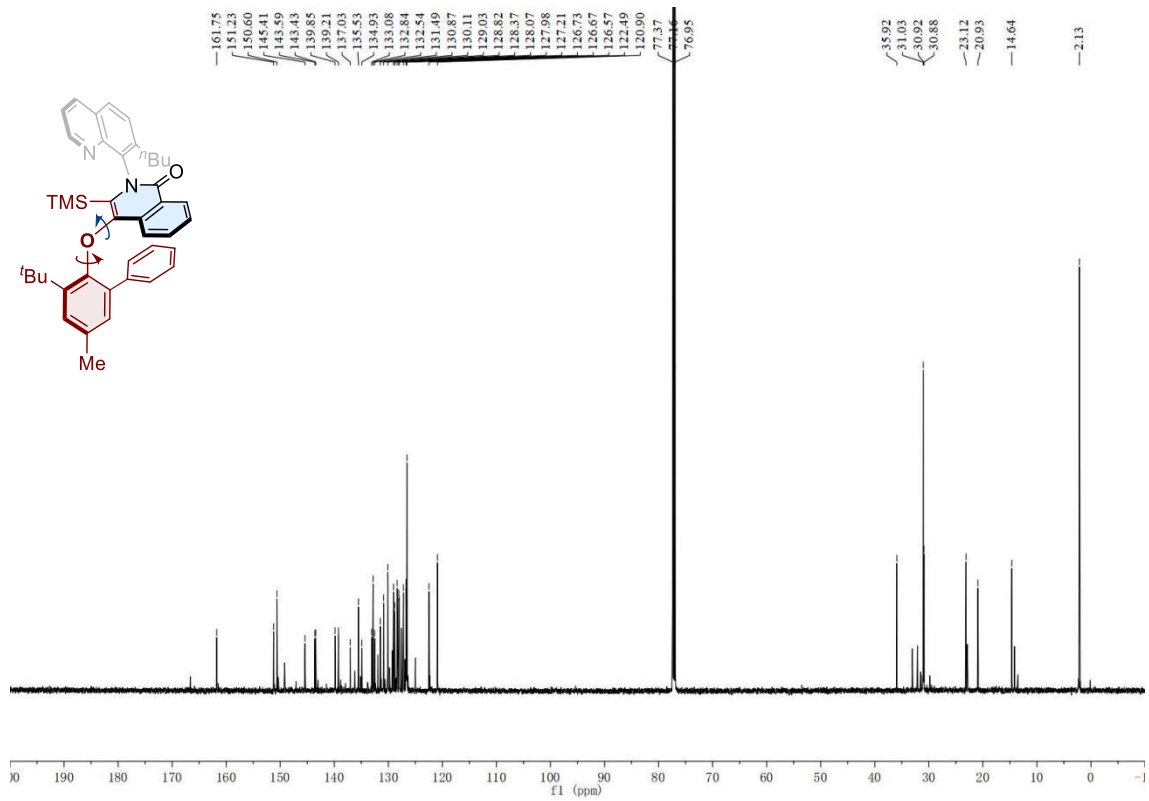

**<sup>13</sup>C NMR spectrum of 5o (151 MHz, CDCl<sub>3</sub>)**

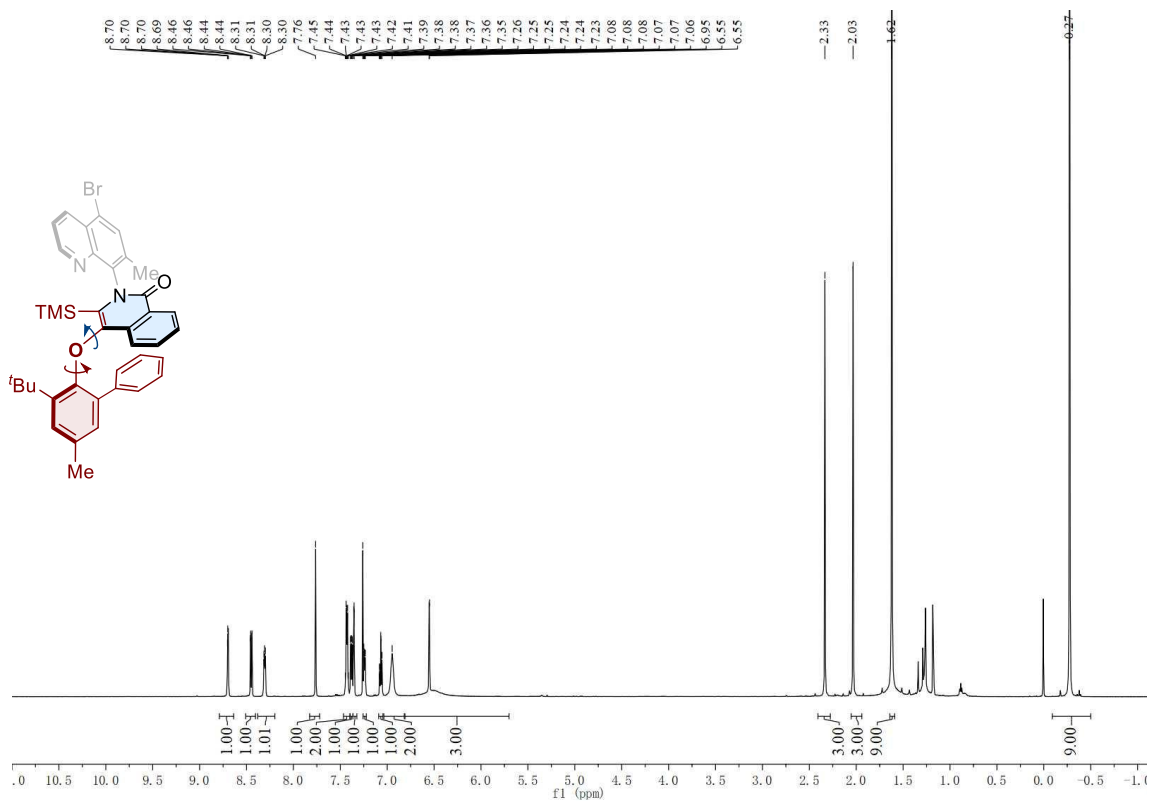

**<sup>1</sup>H NMR spectrum of 5p (600 MHz, CDCl<sub>3</sub>)**

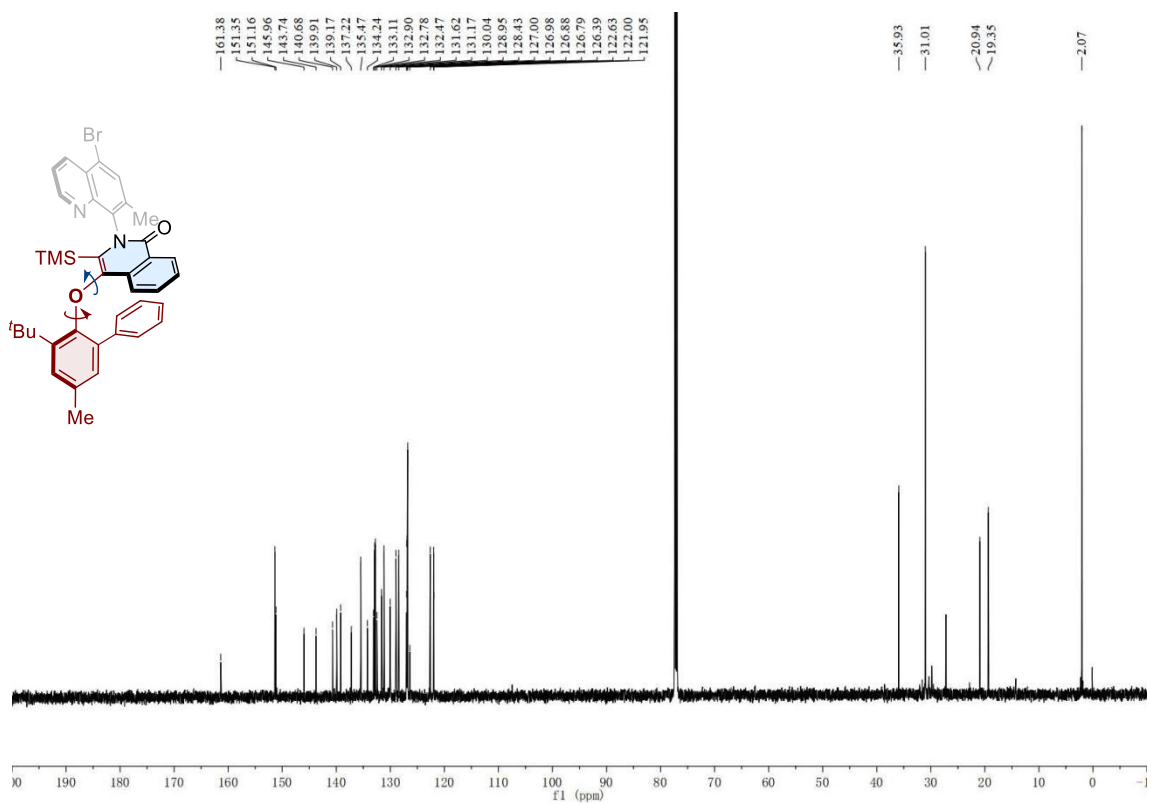

**<sup>13</sup>C NMR spectrum of 5p (151 MHz, CDCl<sub>3</sub>)**



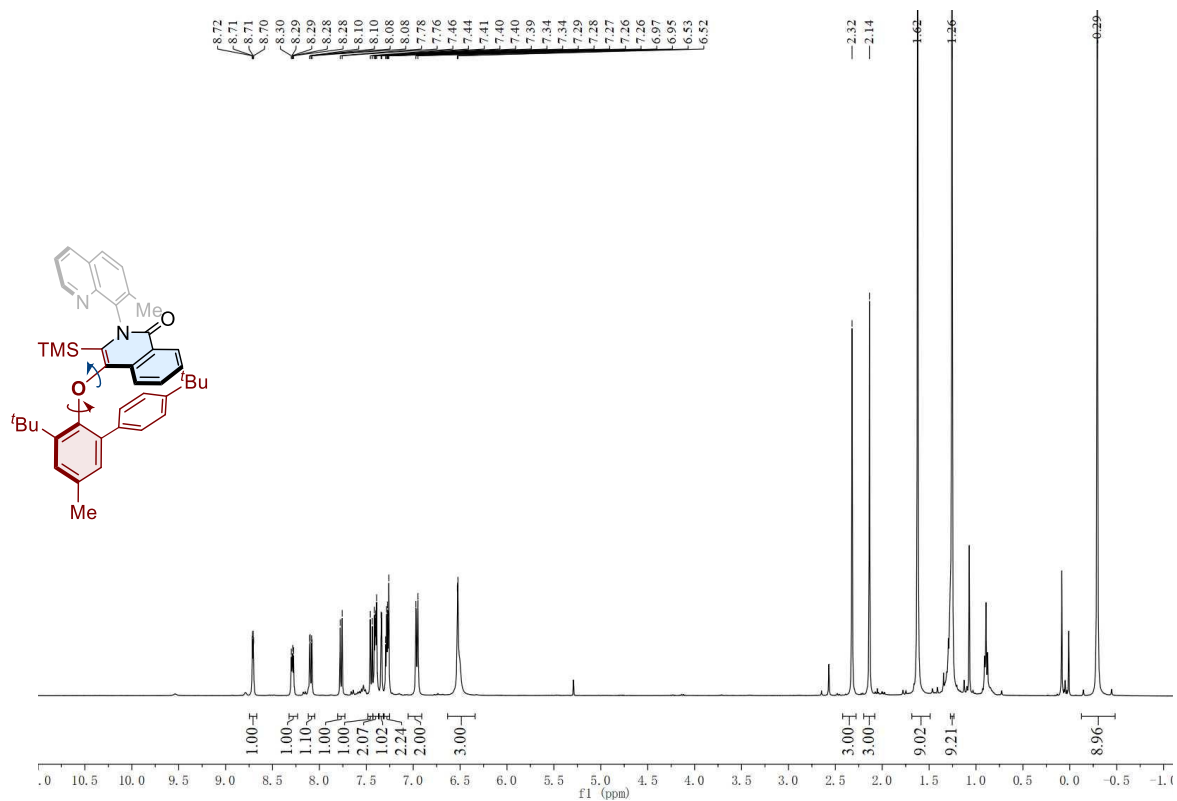

**<sup>1</sup>H NMR spectrum of 5r (600 MHz, CDCl<sub>3</sub>)**

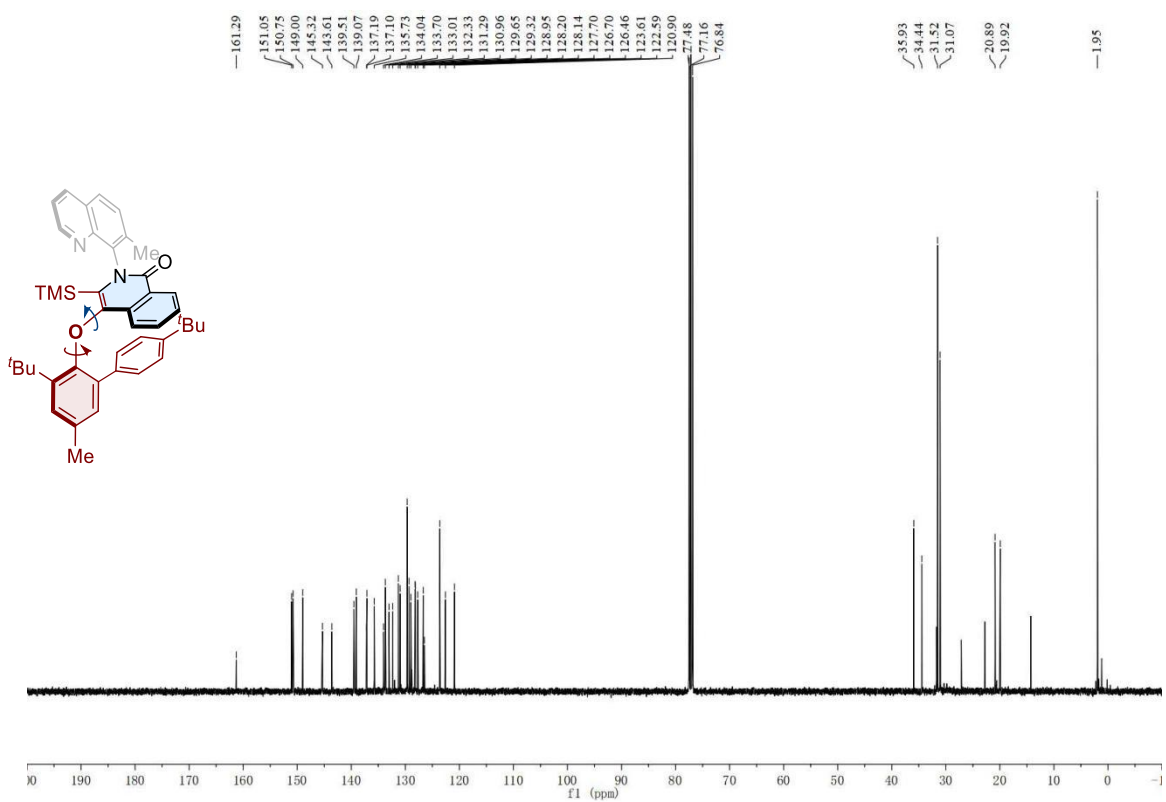

**<sup>13</sup>C NMR spectrum of 5r (151 MHz, CDCl<sub>3</sub>)**

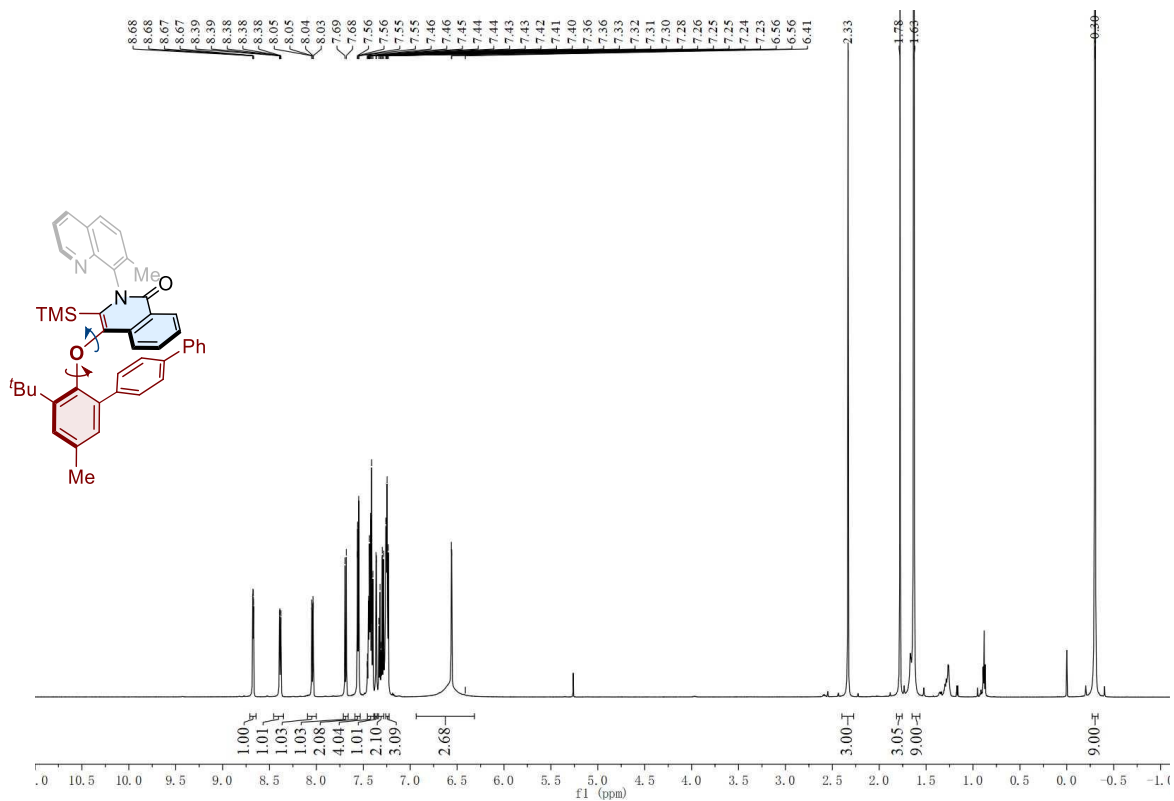

**<sup>1</sup>H NMR spectrum of 5s (600 MHz, CDCl<sub>3</sub>)**

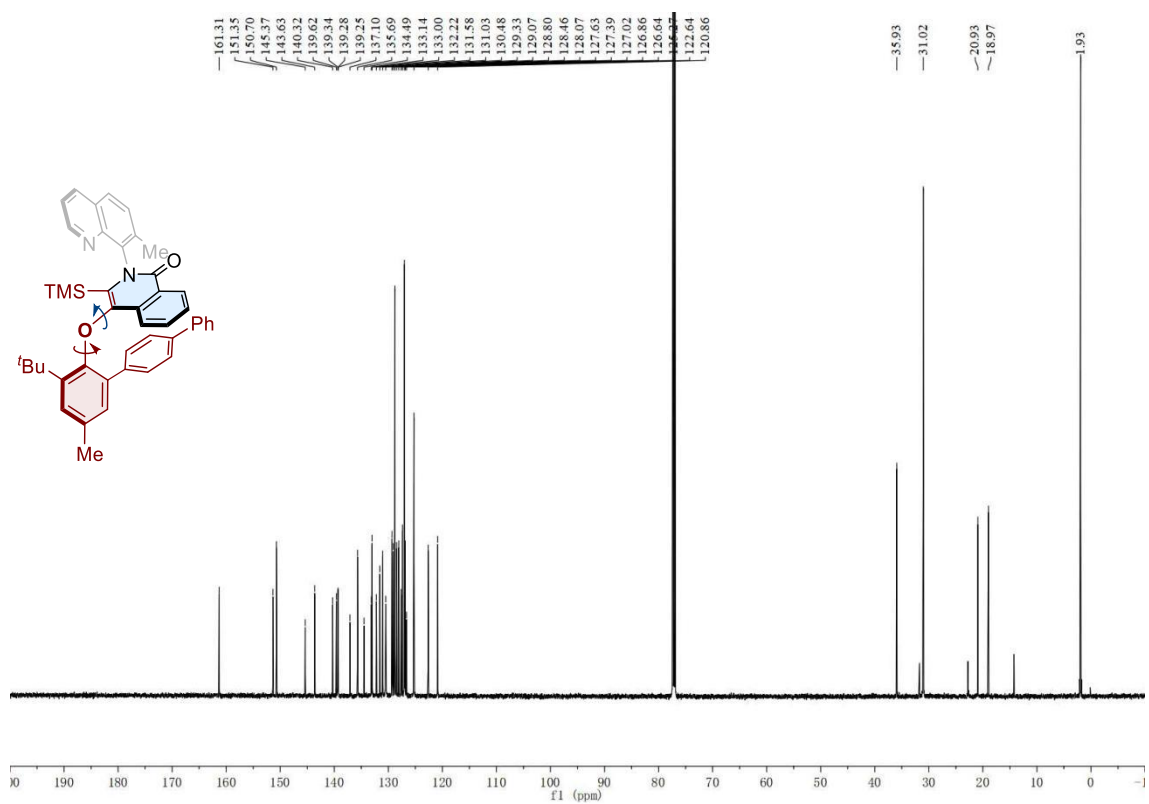

**<sup>13</sup>C NMR spectrum of 5s (151 MHz, CDCl<sub>3</sub>)**

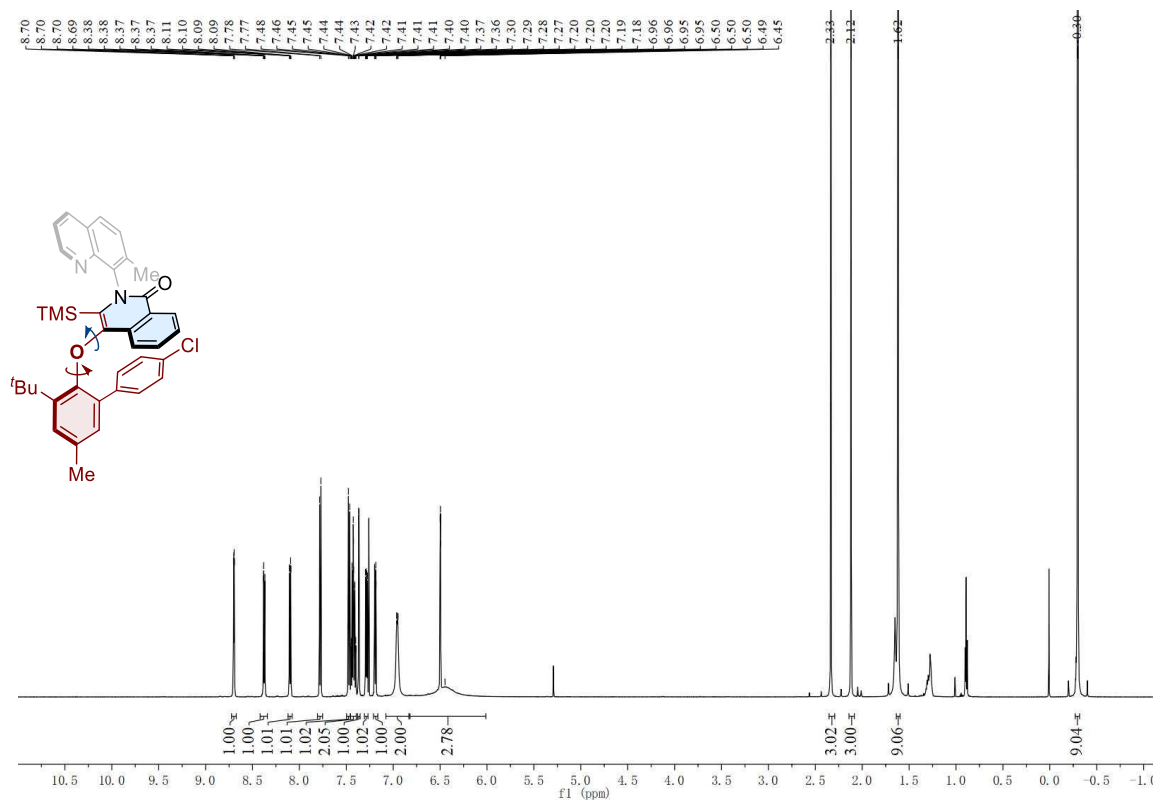

**<sup>1</sup>H NMR spectrum of 5t (600 MHz, CDCl<sub>3</sub>)**

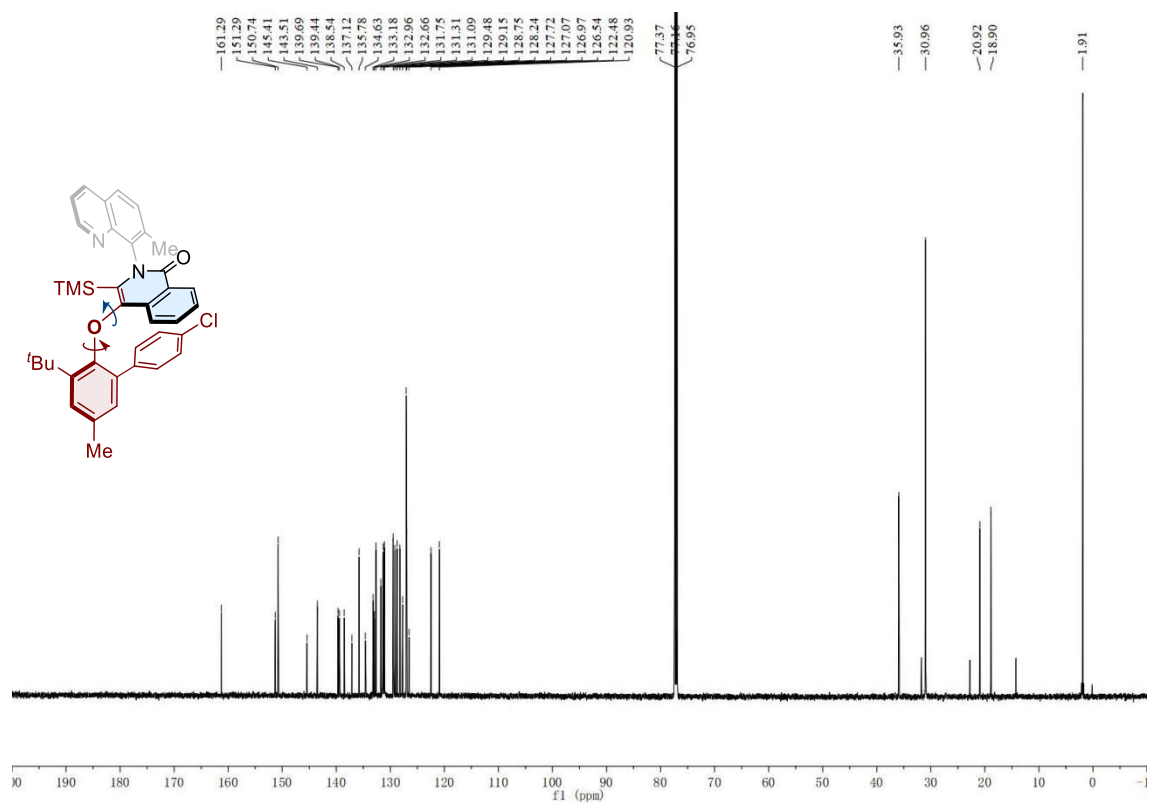

**<sup>13</sup>C NMR spectrum of 5t (151 MHz, CDCl<sub>3</sub>)**

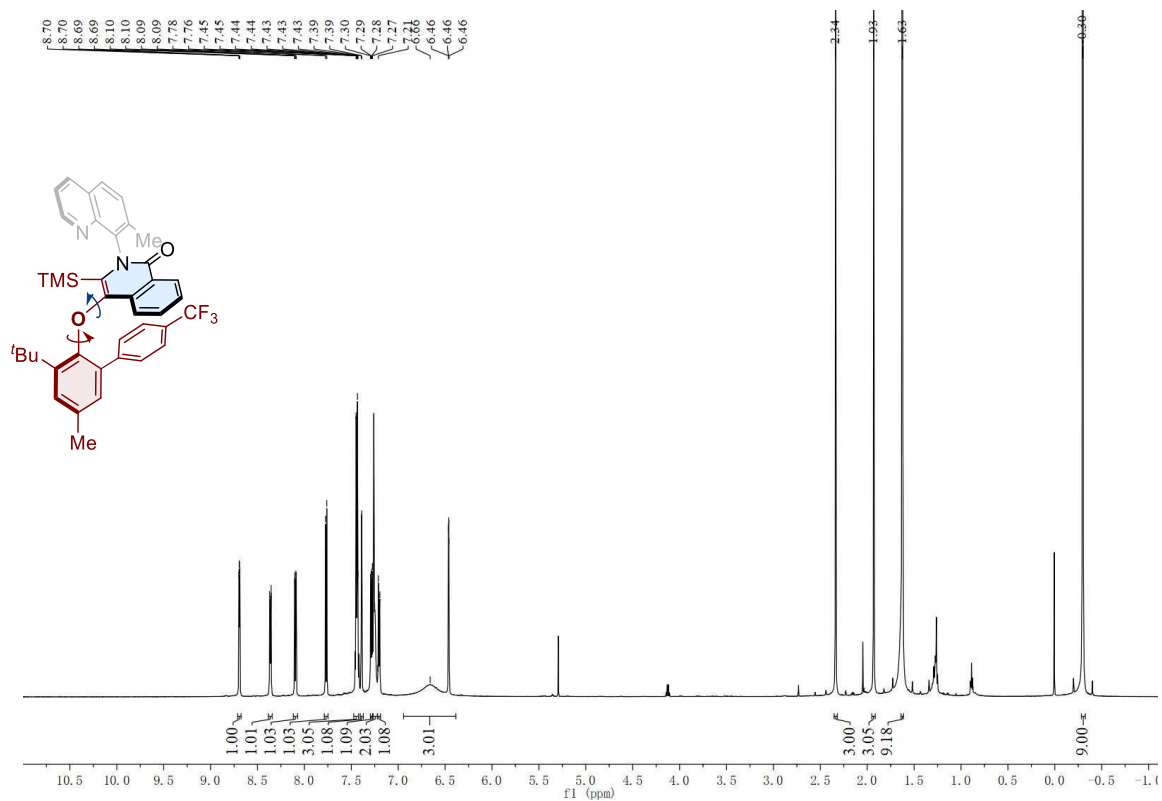

**<sup>1</sup>H NMR spectrum of 5u (600 MHz, CDCl<sub>3</sub>)**

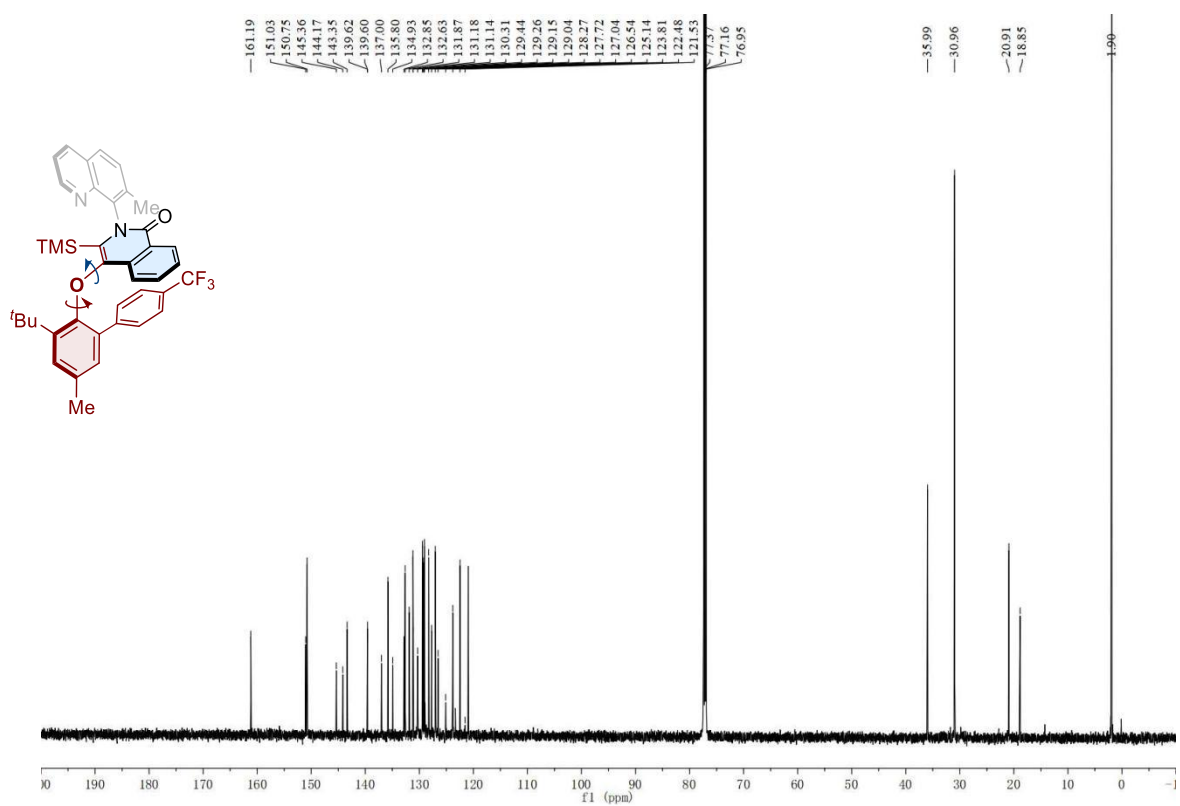

**<sup>13</sup>C NMR spectrum of 5u (151 MHz, CDCl<sub>3</sub>)**

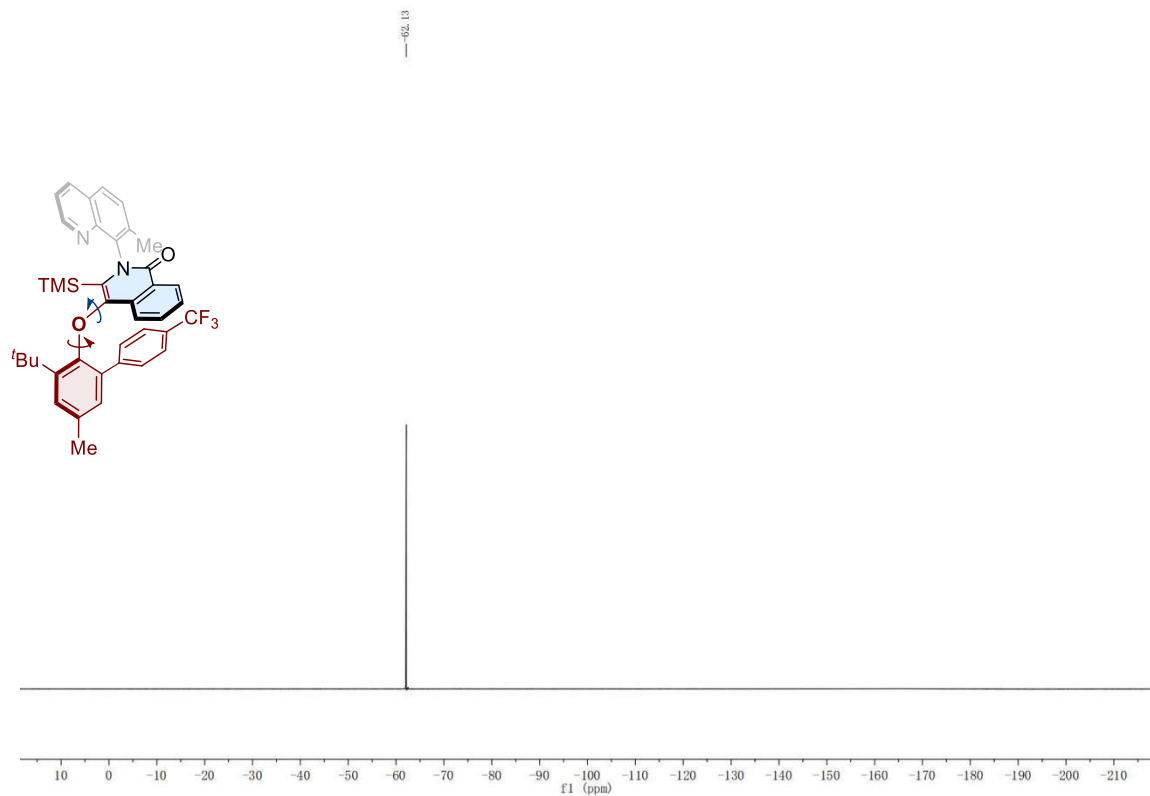

**<sup>19</sup>F NMR spectrum of 5u (565 MHz, CDCl<sub>3</sub>)**

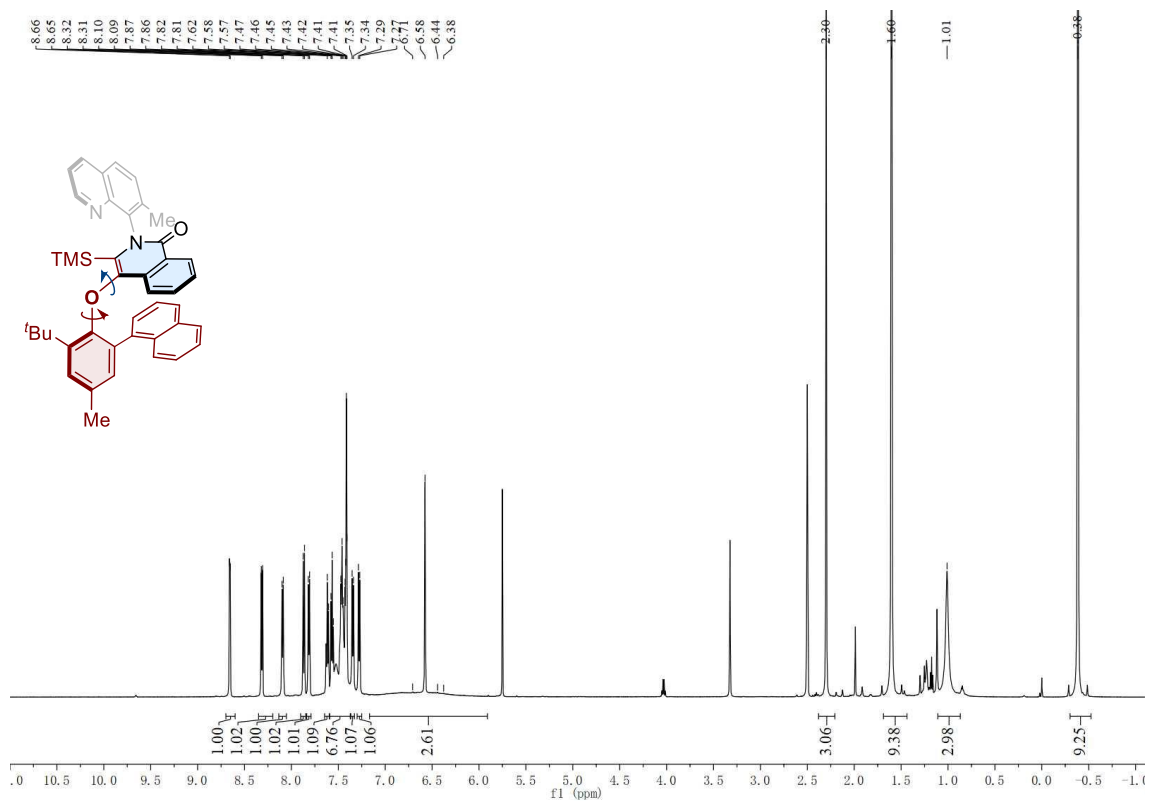

**<sup>1</sup>H NMR spectrum of 5v (600 MHz, CDCl<sub>3</sub>)**

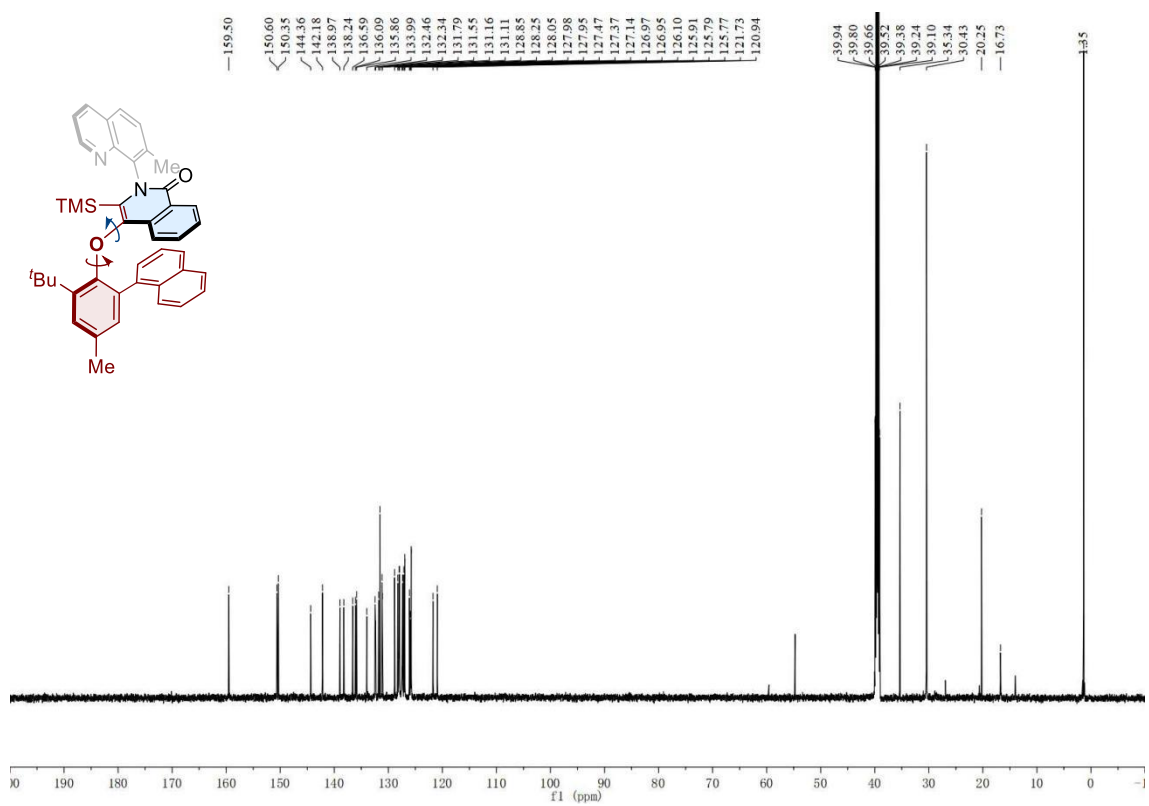

**<sup>13</sup>C NMR spectrum of 5v (151 MHz, CDCl<sub>3</sub>)**

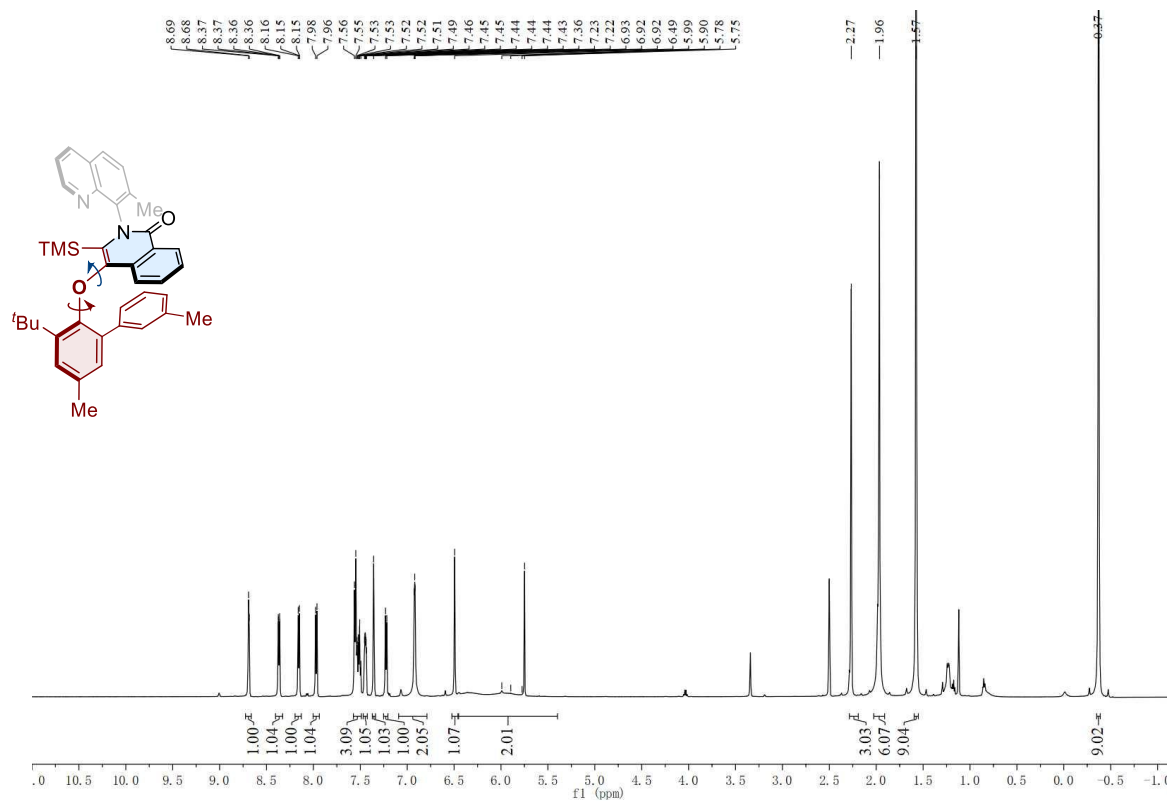

**<sup>1</sup>H NMR spectrum of 5w (600 MHz, CDCl<sub>3</sub>)**

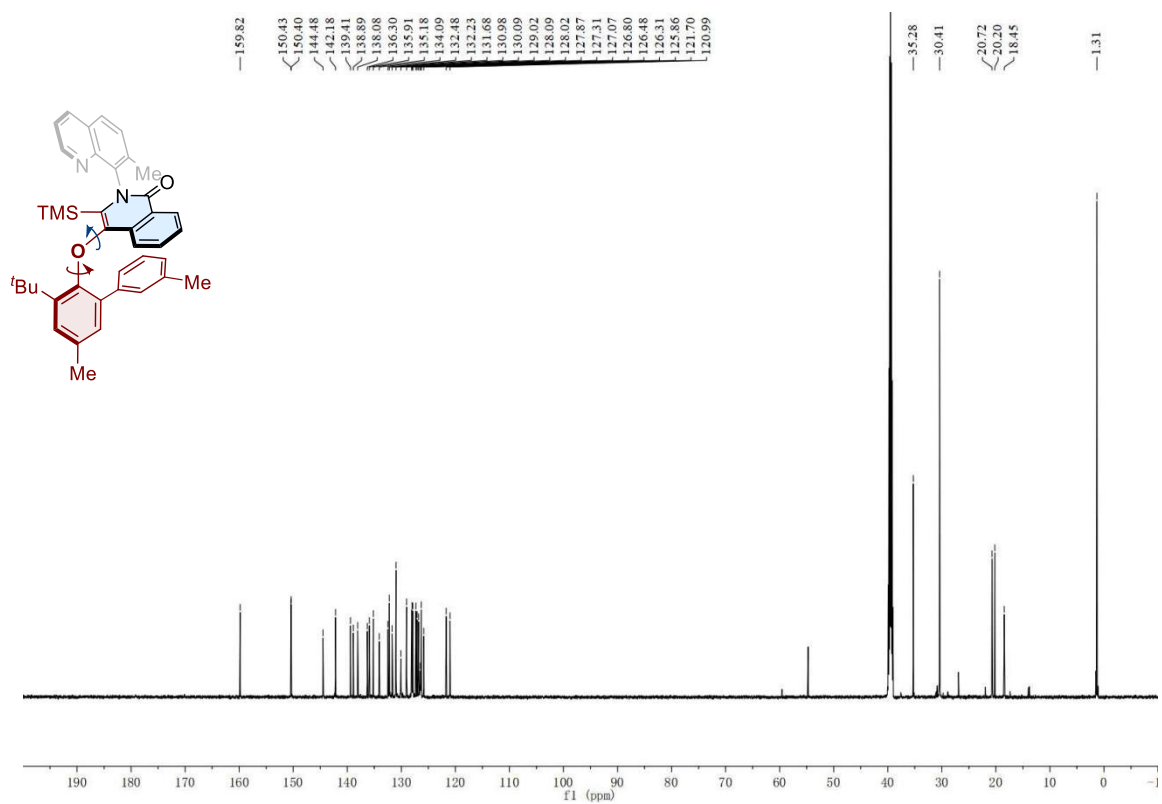

**<sup>13</sup>C NMR spectrum of 5w (151 MHz, CDCl<sub>3</sub>)**

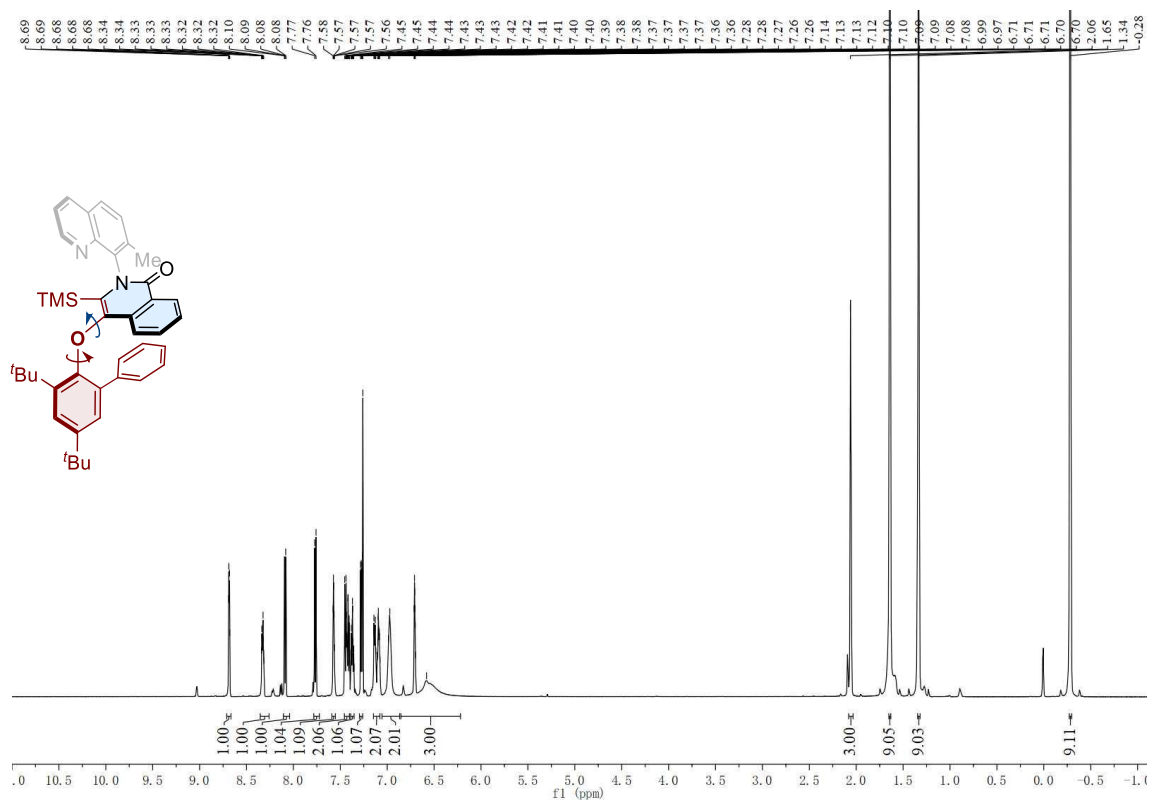

**<sup>1</sup>H NMR spectrum of 5x (600 MHz, CDCl<sub>3</sub>)**

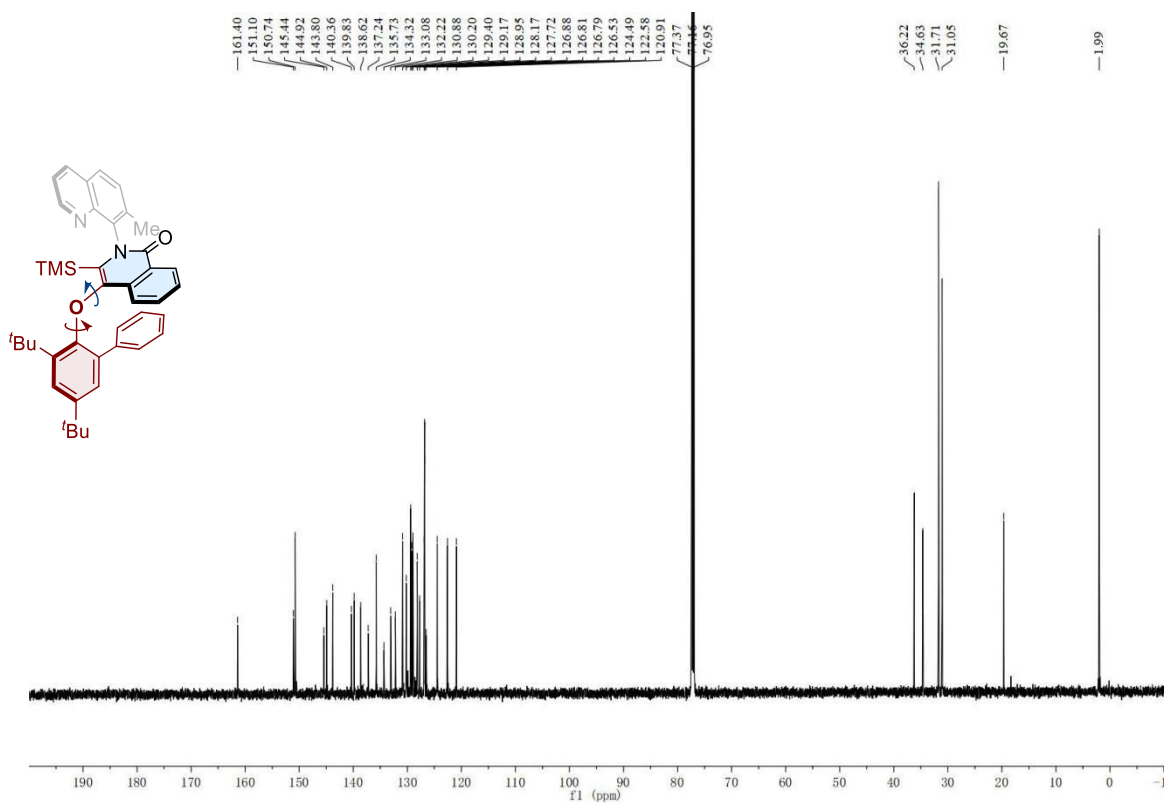

**<sup>13</sup>C NMR spectrum of 5x (151 MHz, CDCl<sub>3</sub>)**

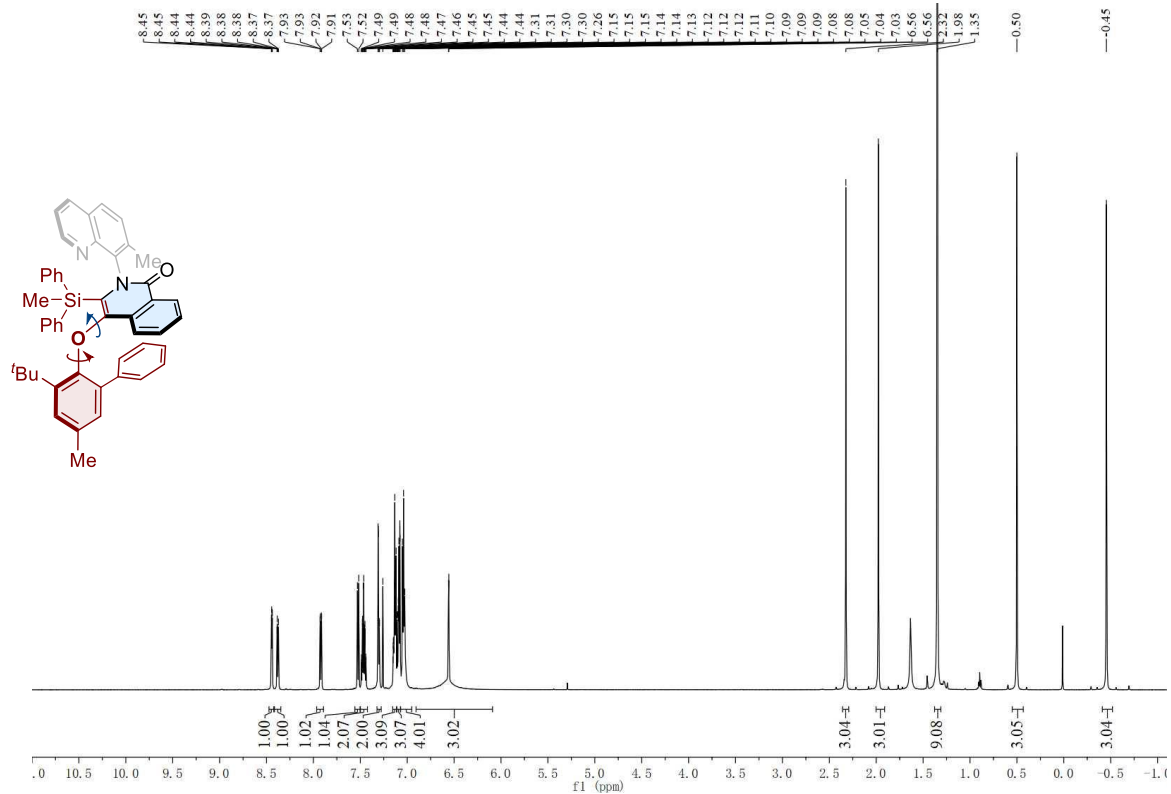

**<sup>1</sup>H NMR spectrum of 5y (600 MHz, CDCl<sub>3</sub>)**

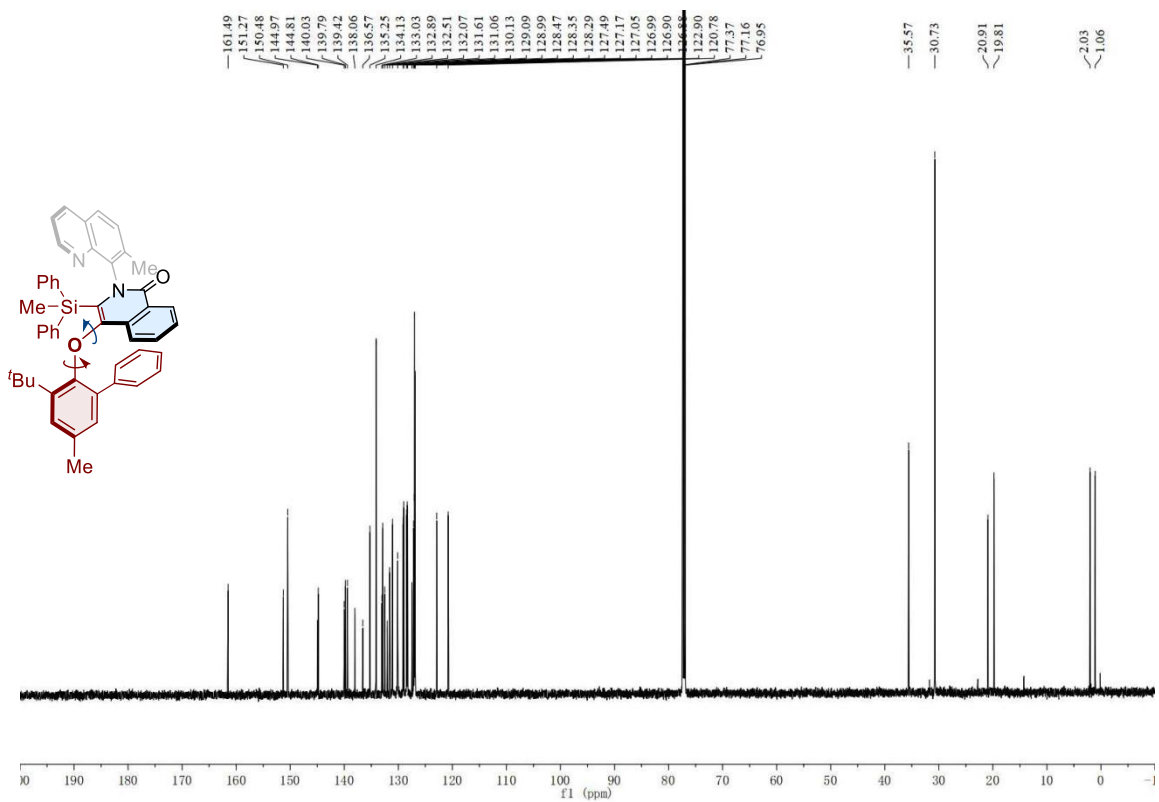

**<sup>13</sup>C NMR spectrum of 5y (151 MHz, CDCl<sub>3</sub>)**

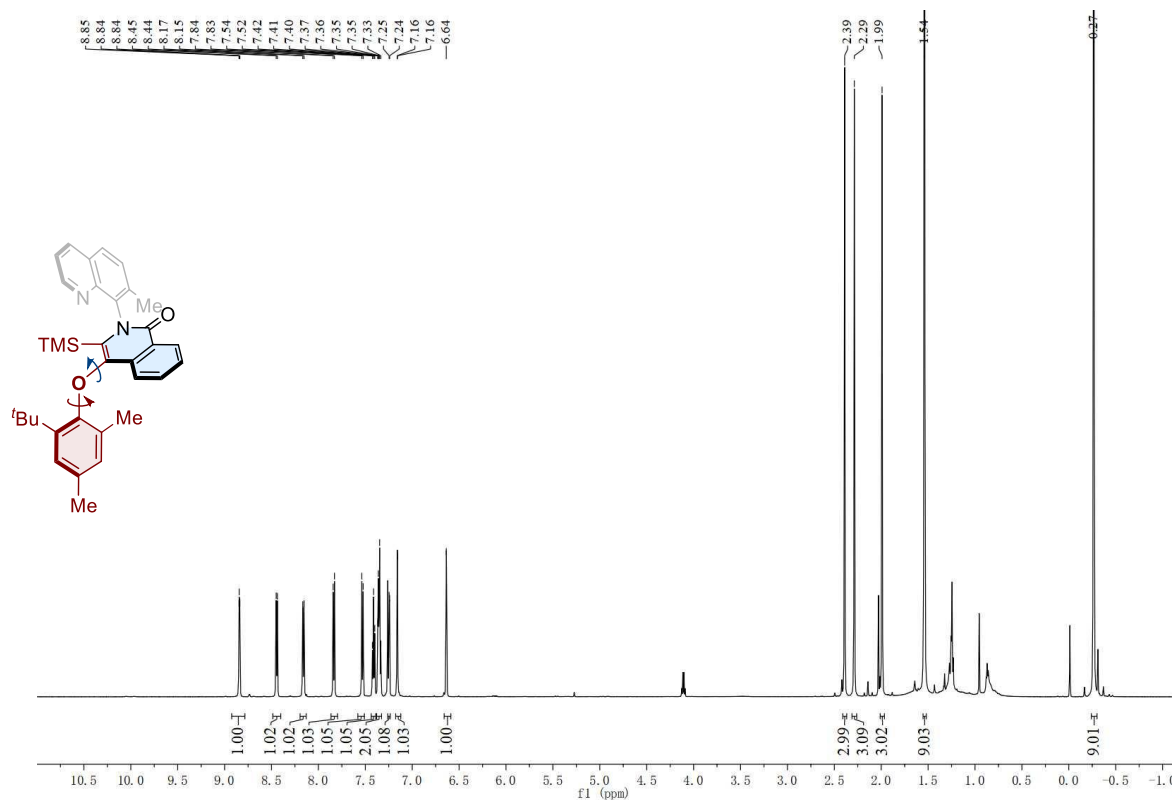

**<sup>1</sup>H NMR spectrum of 5z (600 MHz, CDCl<sub>3</sub>)**

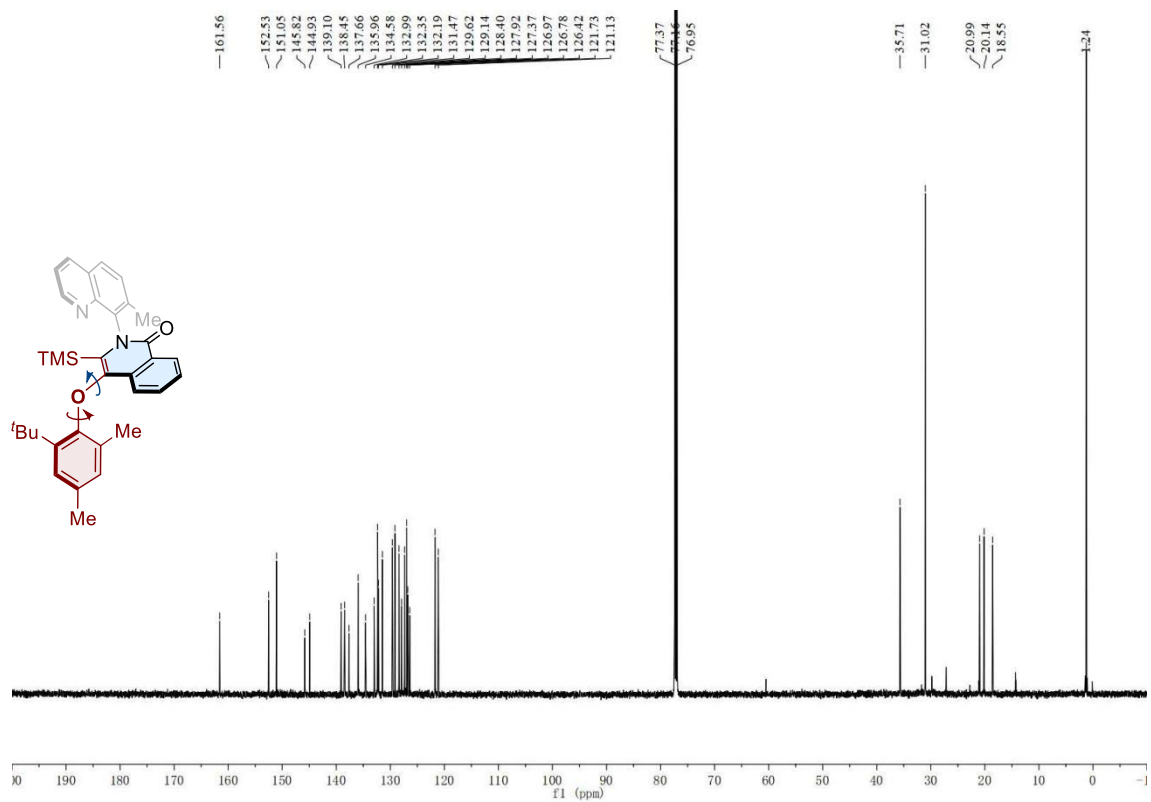

**<sup>13</sup>C NMR spectrum of 5z (151 MHz, CDCl<sub>3</sub>)**

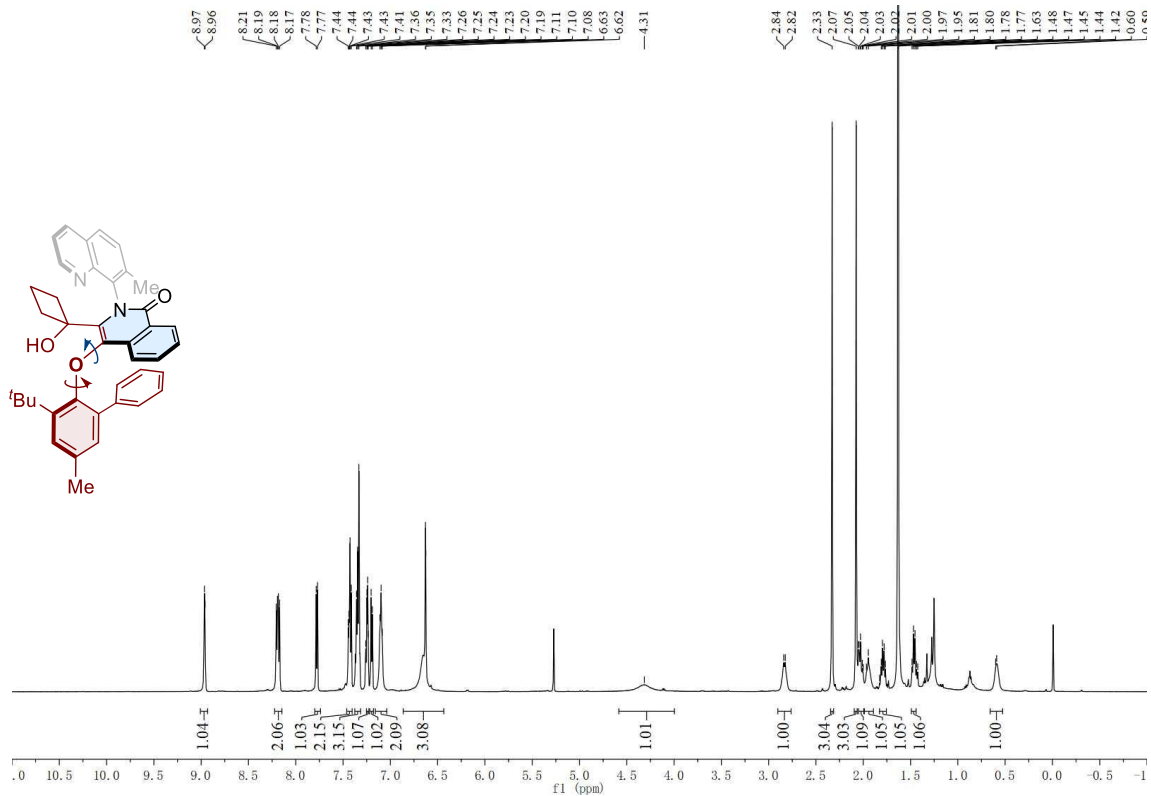

**<sup>1</sup>H NMR spectrum of 5za (600 MHz, CDCl<sub>3</sub>)**

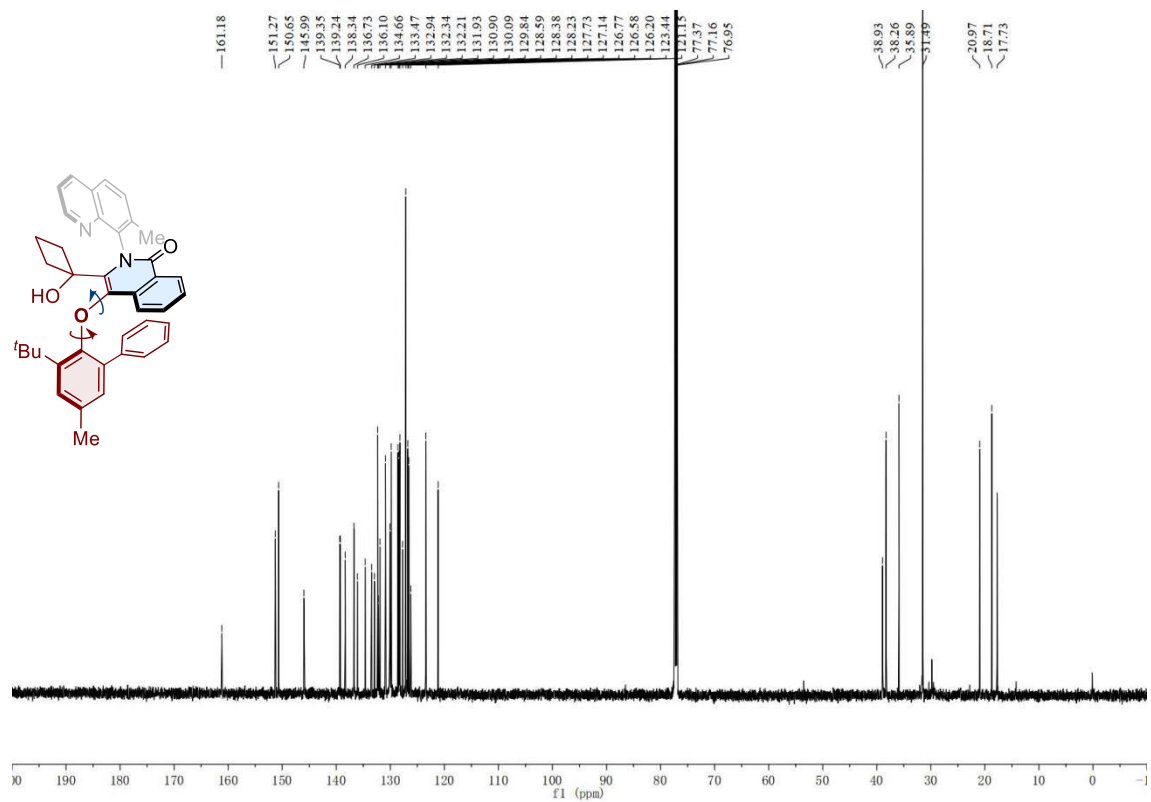

**<sup>13</sup>C NMR spectrum of 5za (151 MHz, CDCl<sub>3</sub>)**

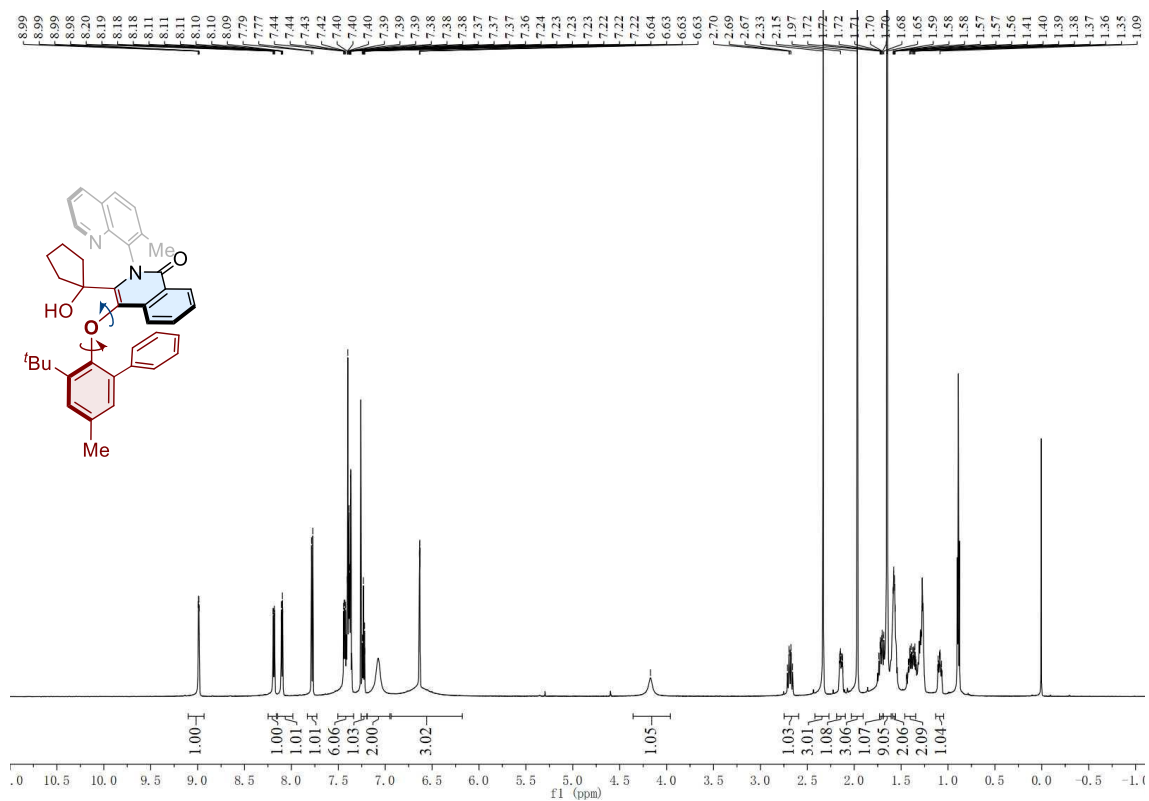

**<sup>1</sup>H NMR spectrum of 5zb (600 MHz, CDCl<sub>3</sub>)**

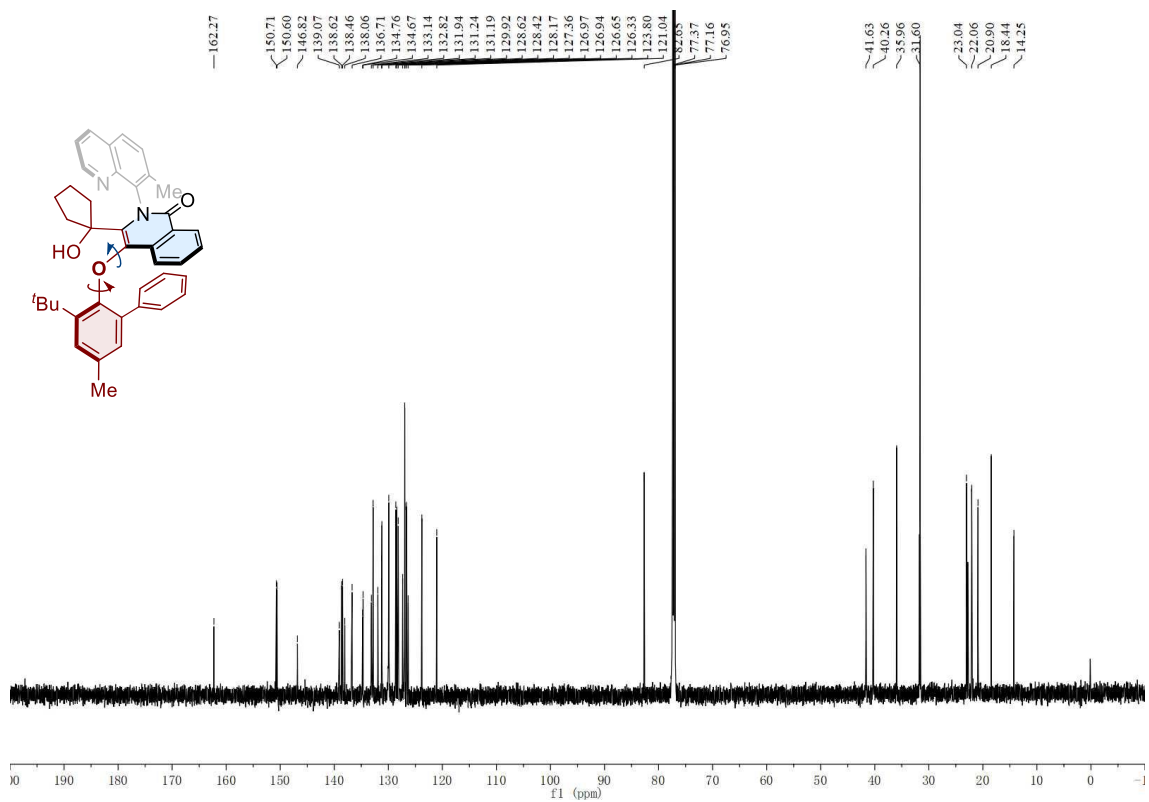

**<sup>13</sup>C NMR spectrum of 5zb (151 MHz, CDCl<sub>3</sub>)**

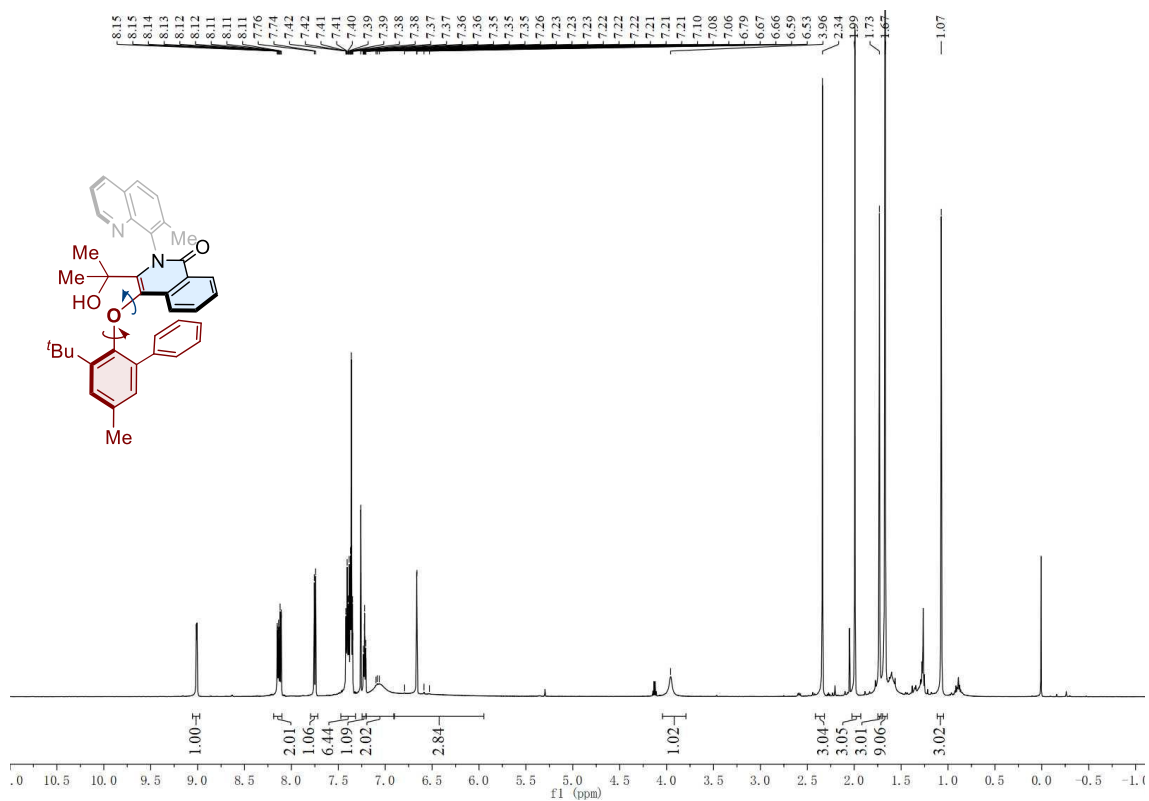

**<sup>1</sup>H NMR spectrum of 5zc (600 MHz, CDCl<sub>3</sub>)**

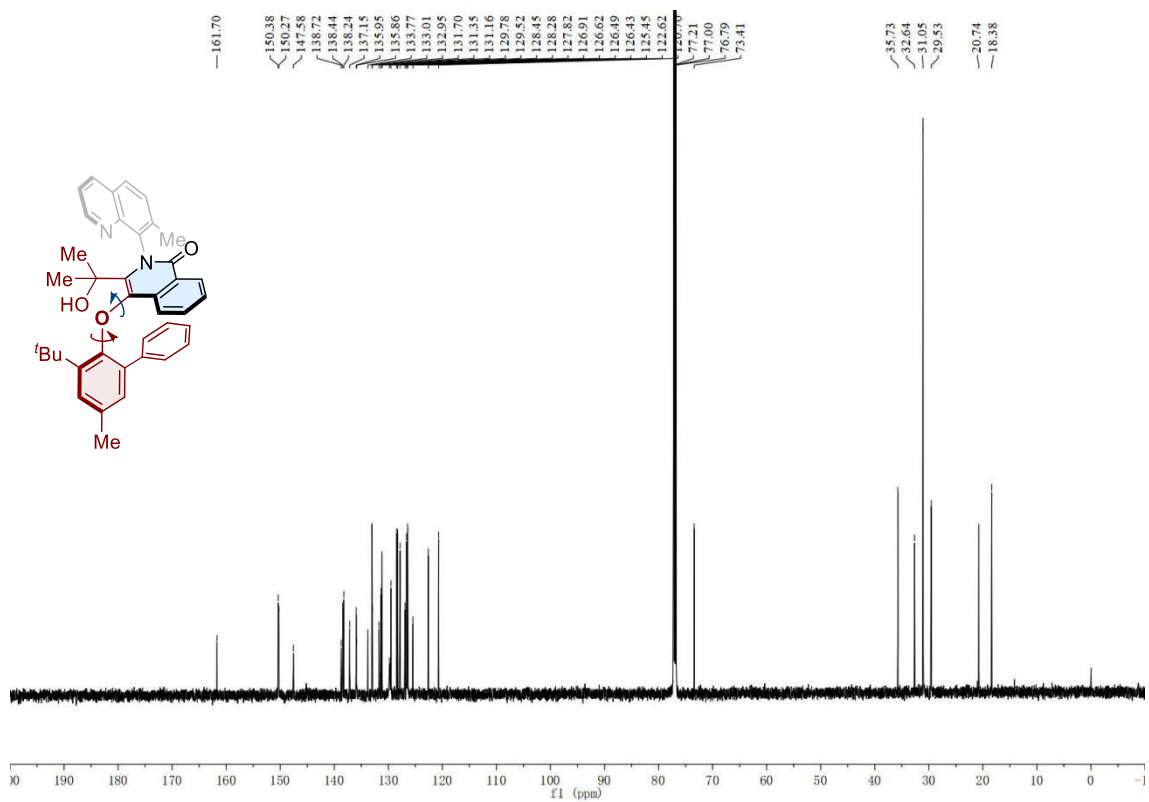

**<sup>13</sup>C NMR spectrum of 5zc (151 MHz, CDCl<sub>3</sub>)**

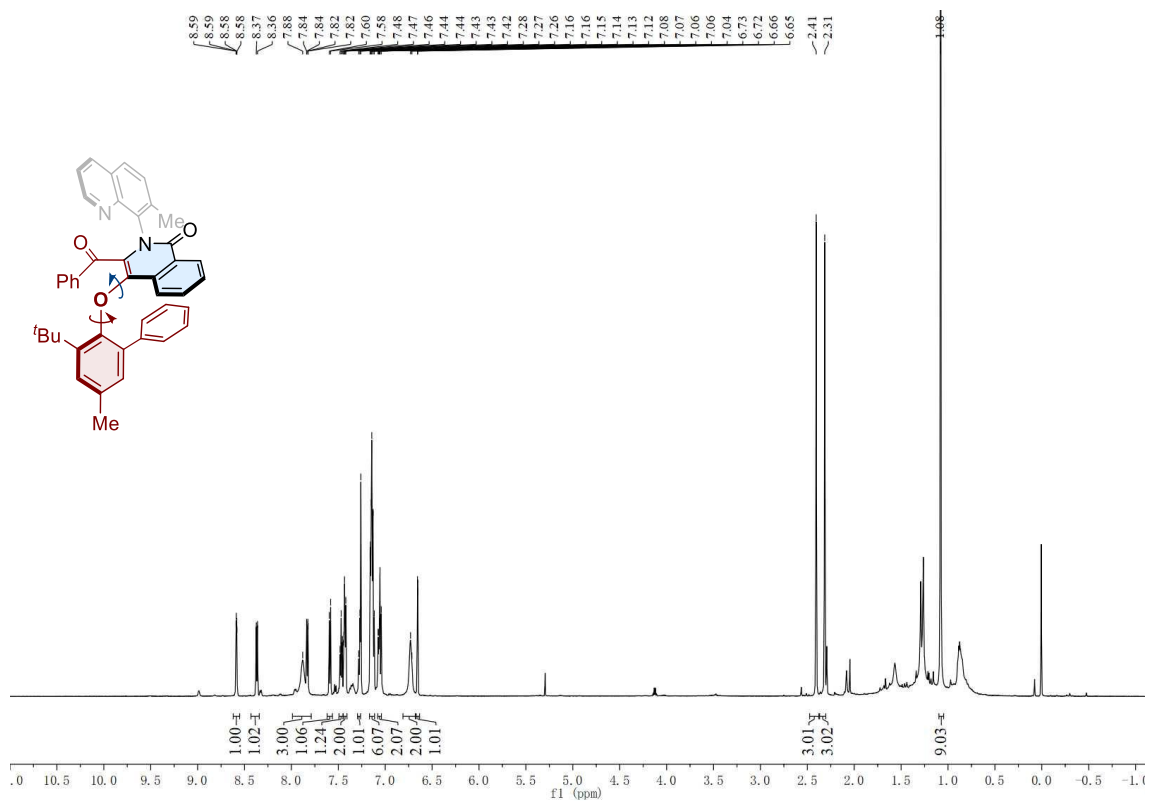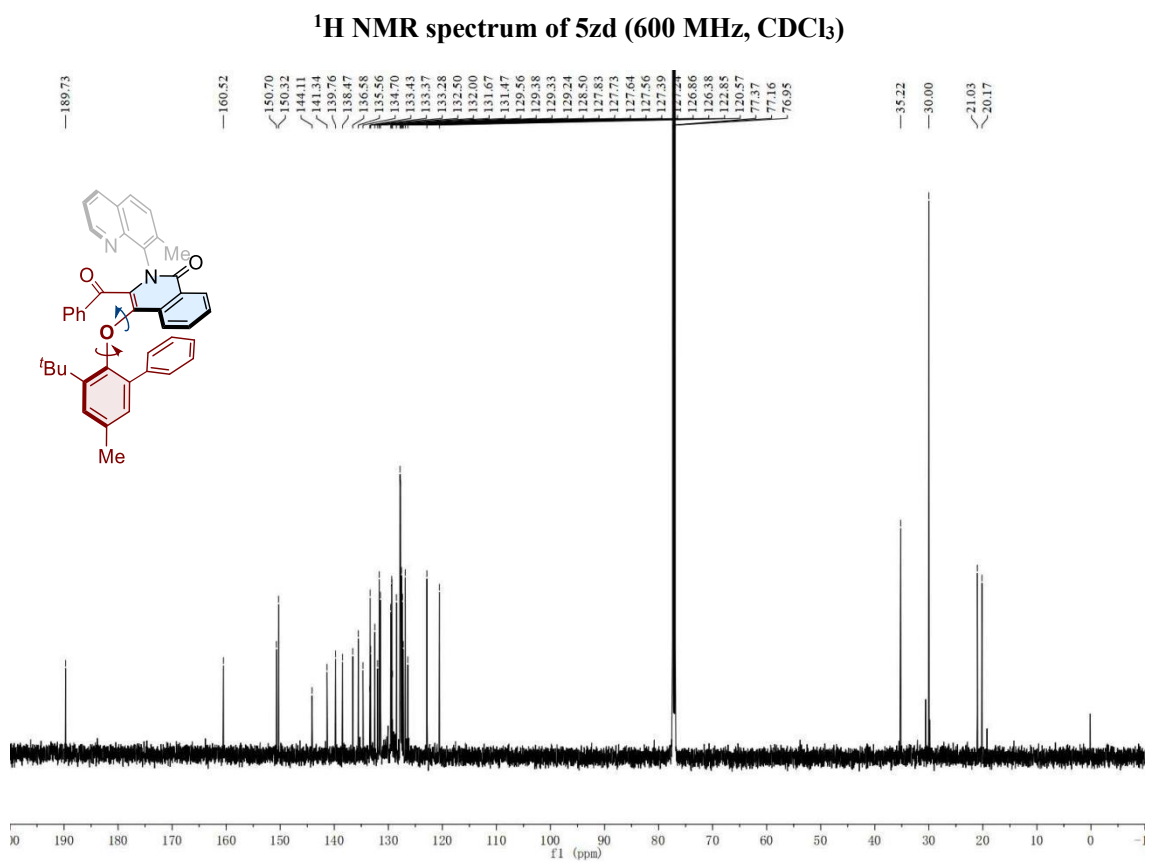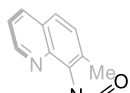

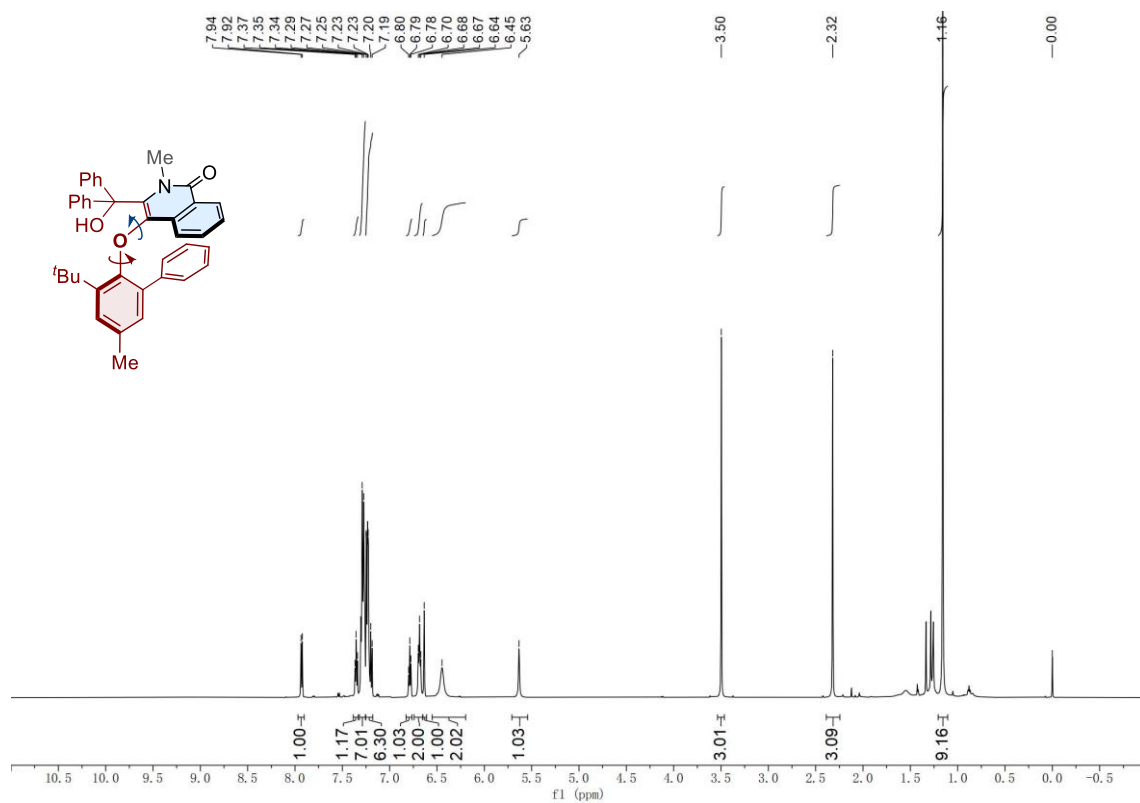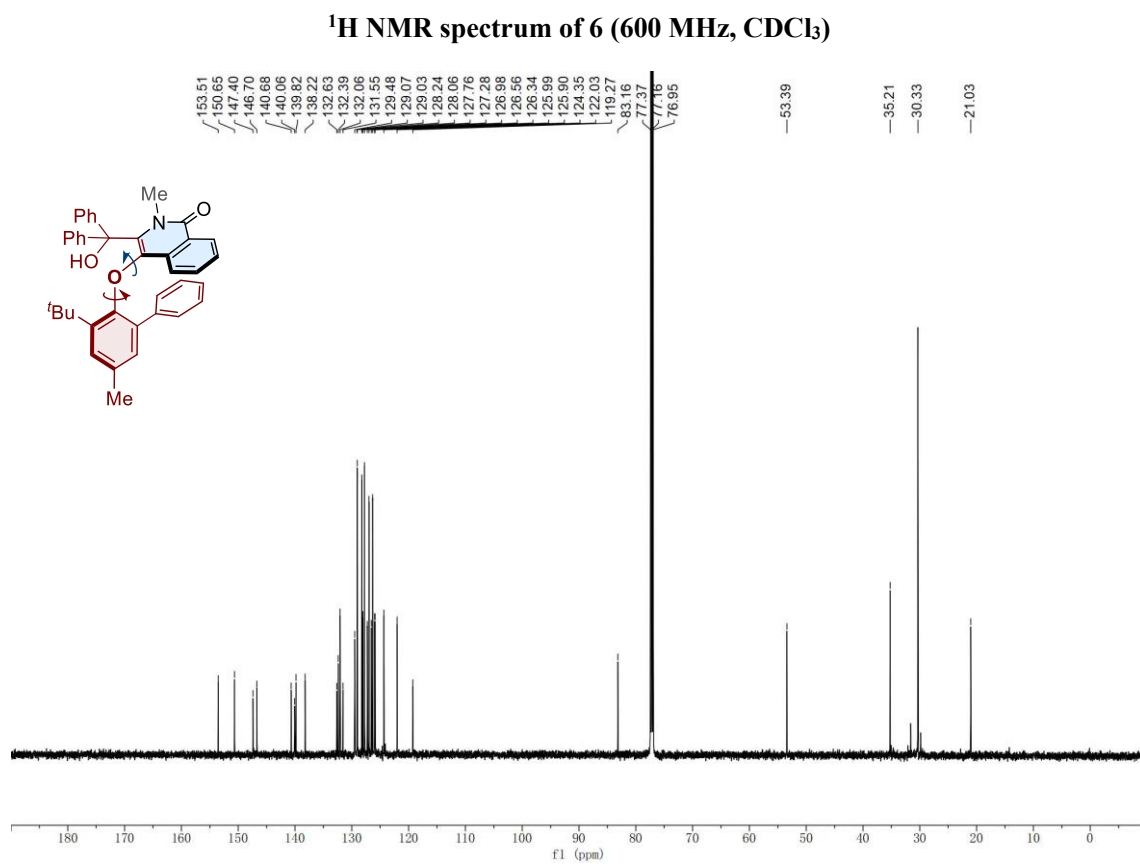

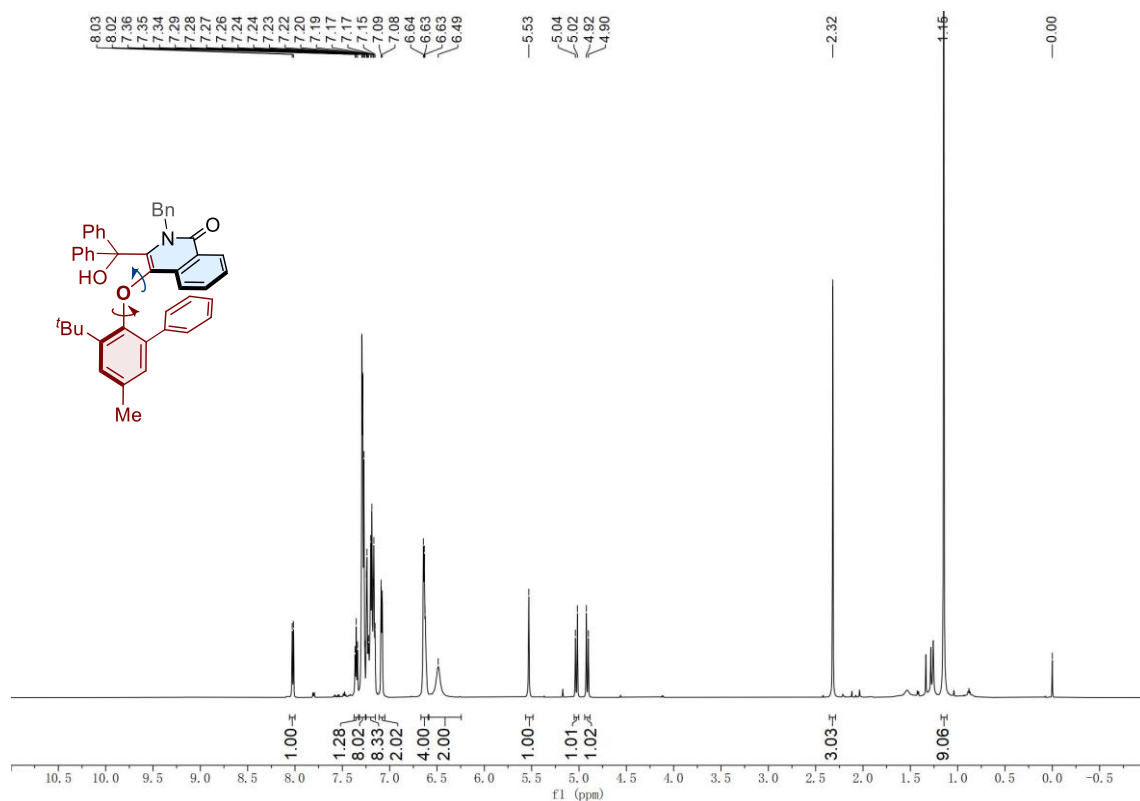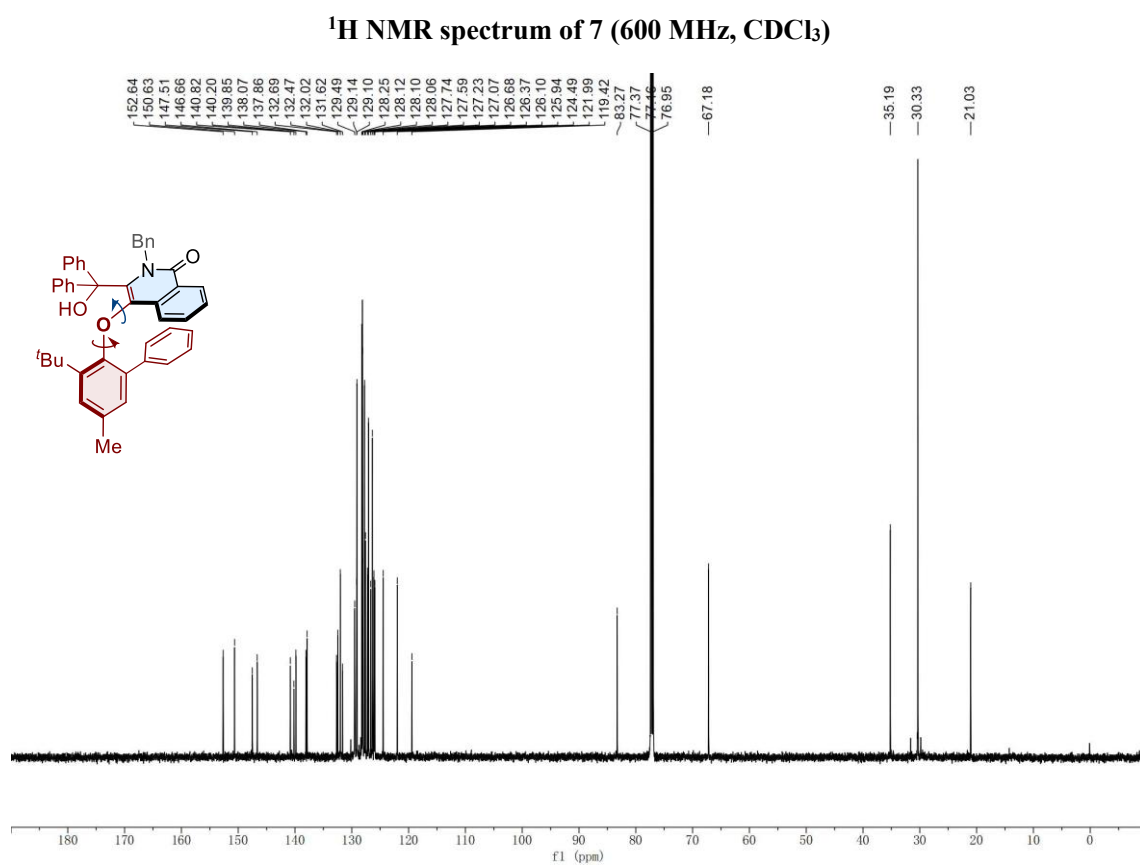

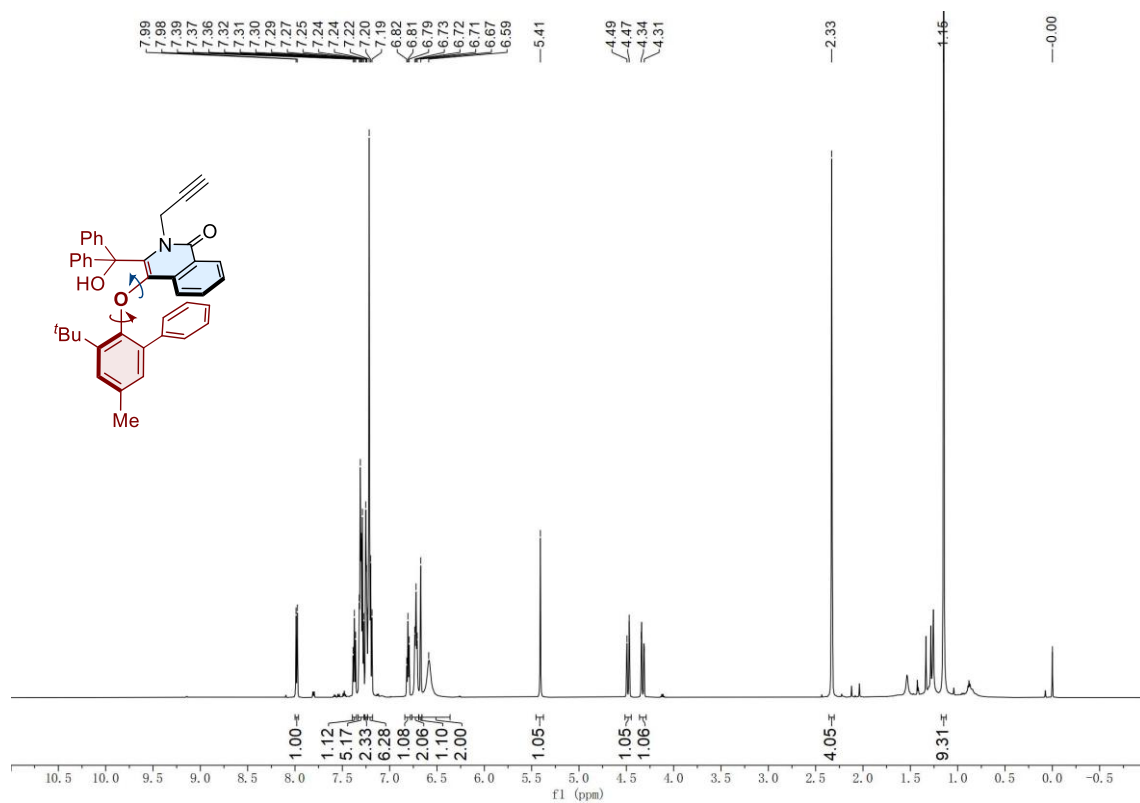

**<sup>1</sup>H NMR spectrum of 8 (600 MHz, CDCl<sub>3</sub>)**

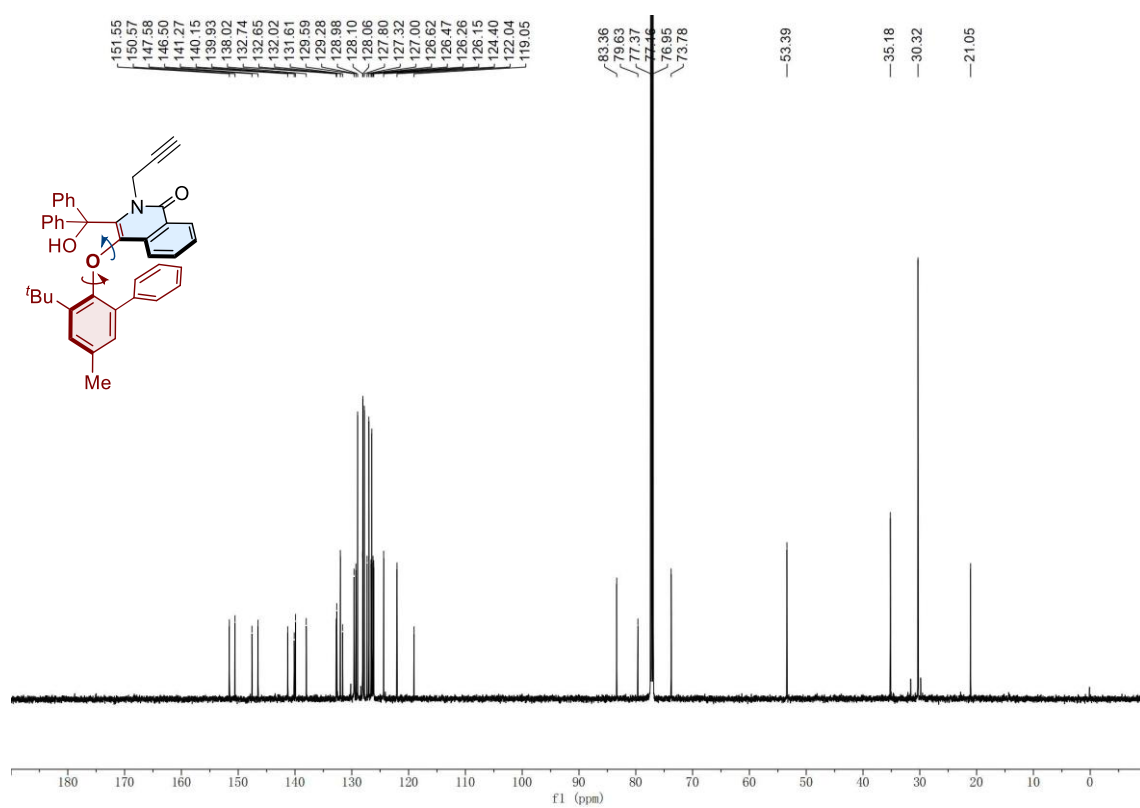

**<sup>13</sup>C NMR spectrum of 8 (151 MHz, CDCl<sub>3</sub>)**

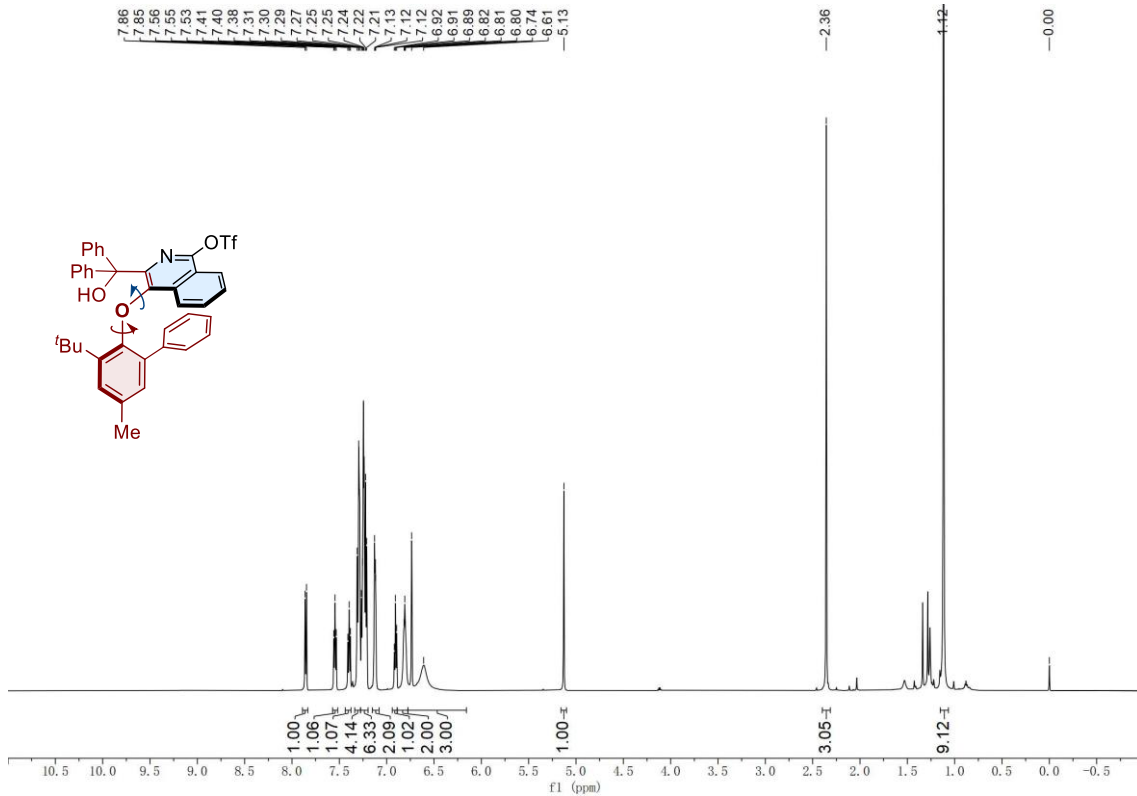

<sup>1</sup>H NMR spectrum of 9 (600 MHz, CDCl<sub>3</sub>)

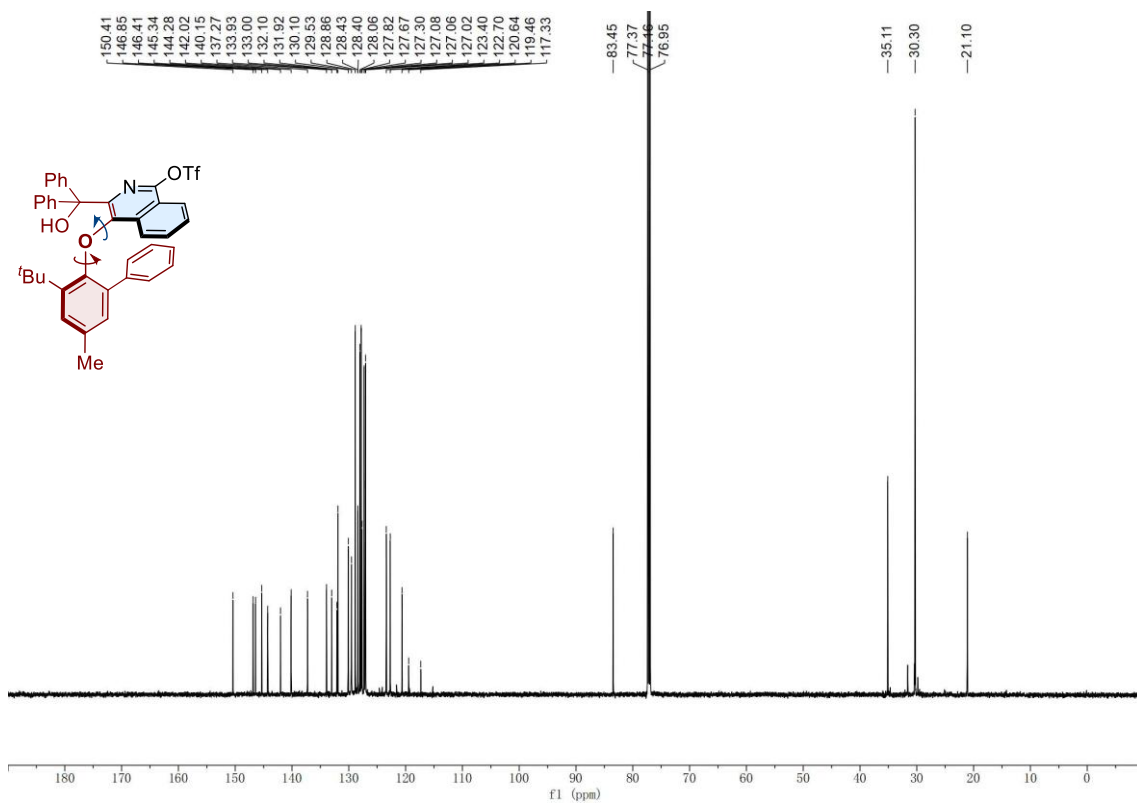

<sup>13</sup>C NMR spectrum of 9 (151 MHz, CDCl<sub>3</sub>)

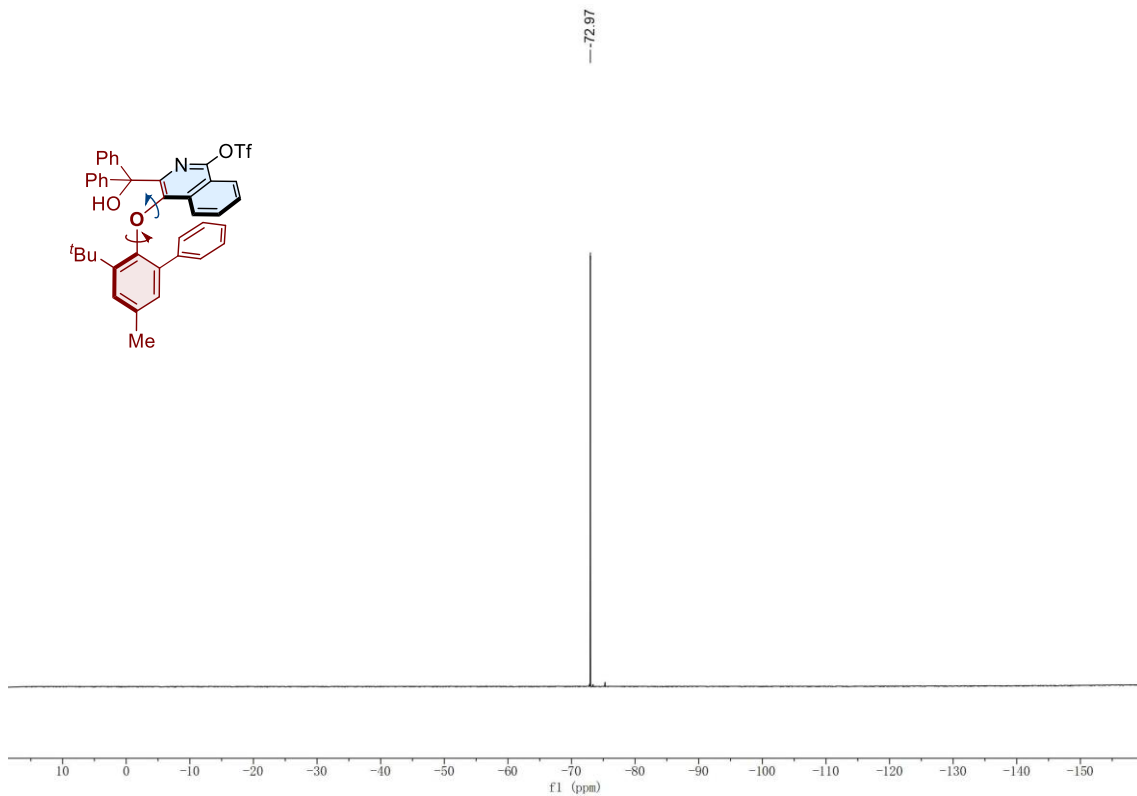

$^{19}\text{F}$  NMR spectrum of 9 (565 MHz,  $\text{CDCl}_3$ )

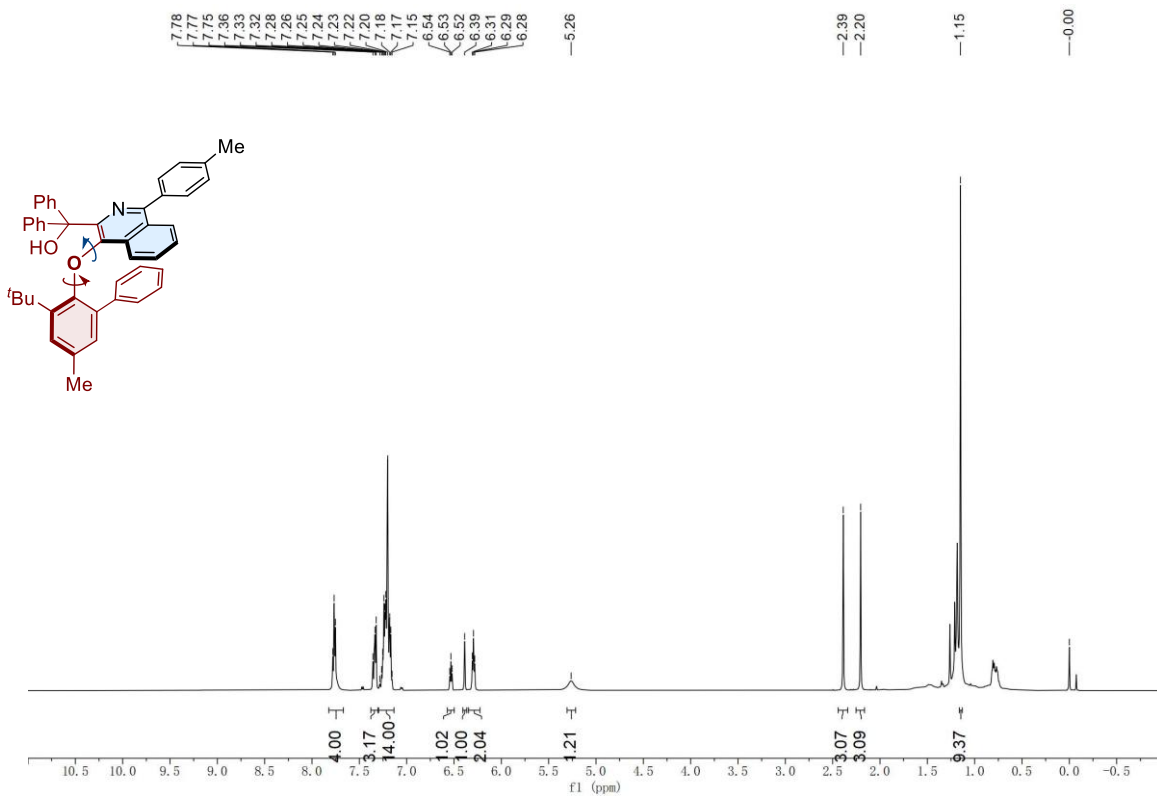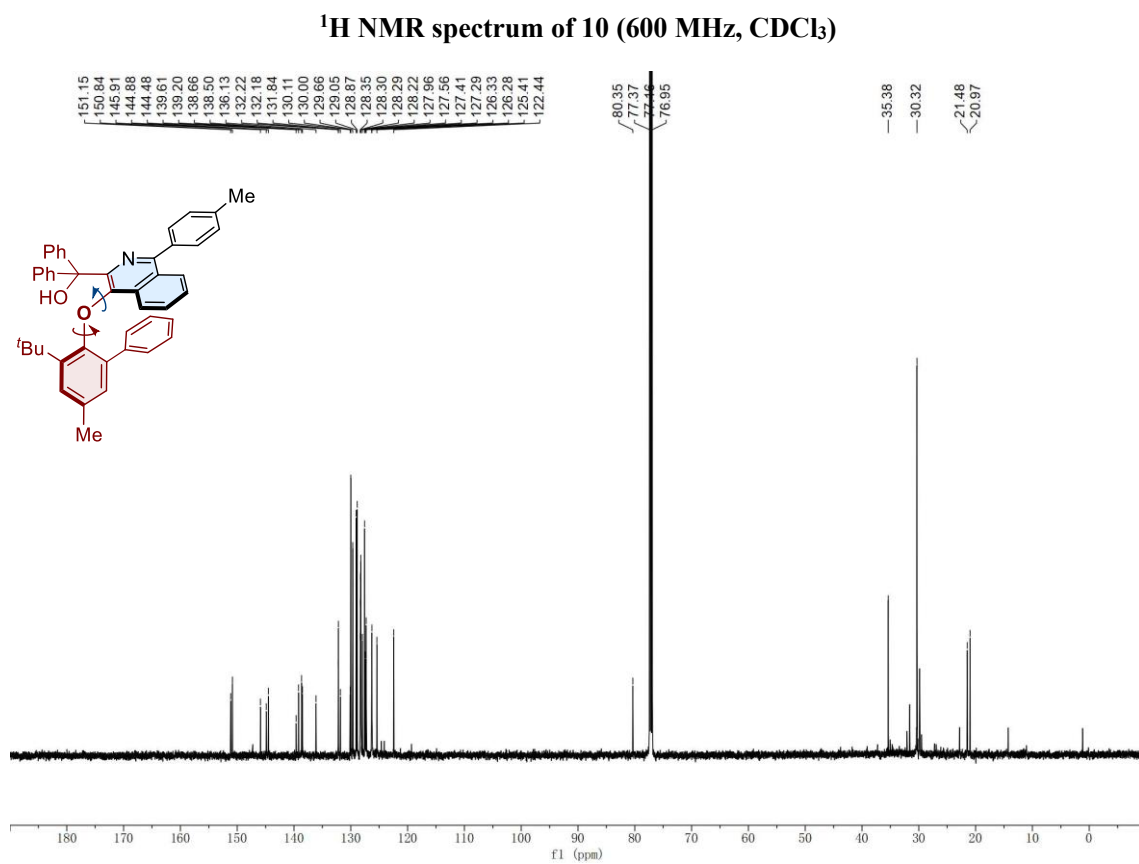

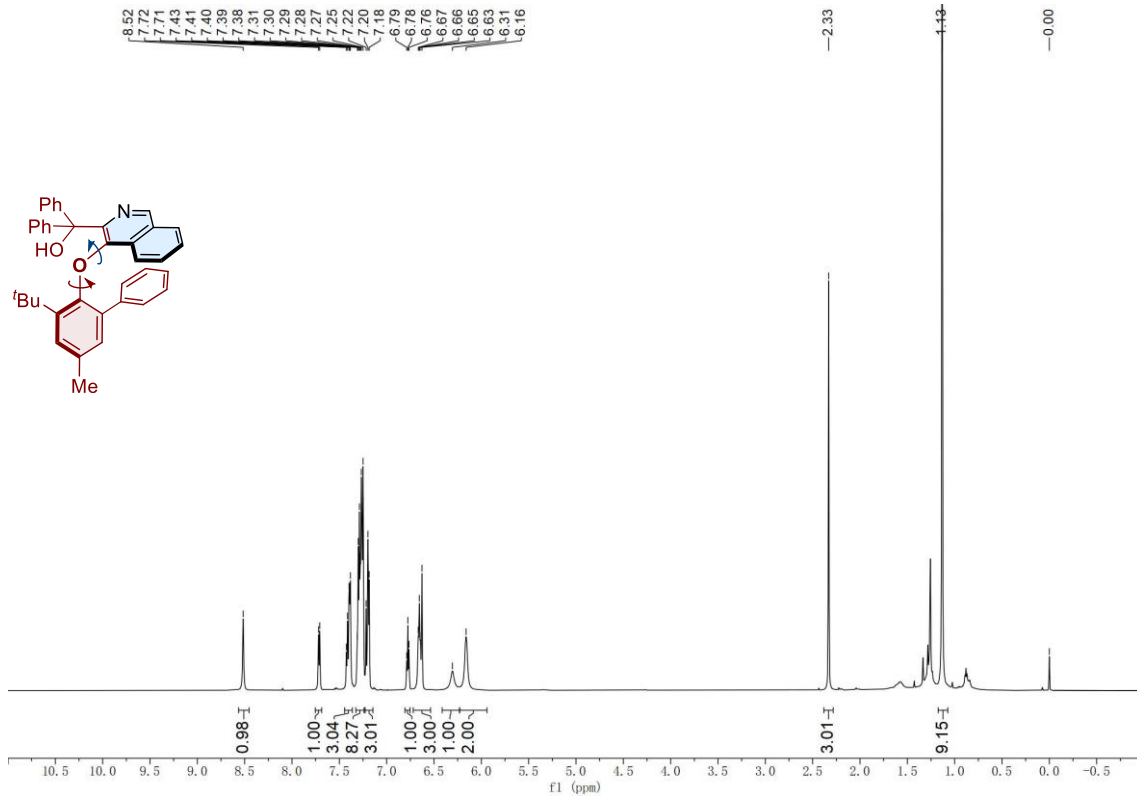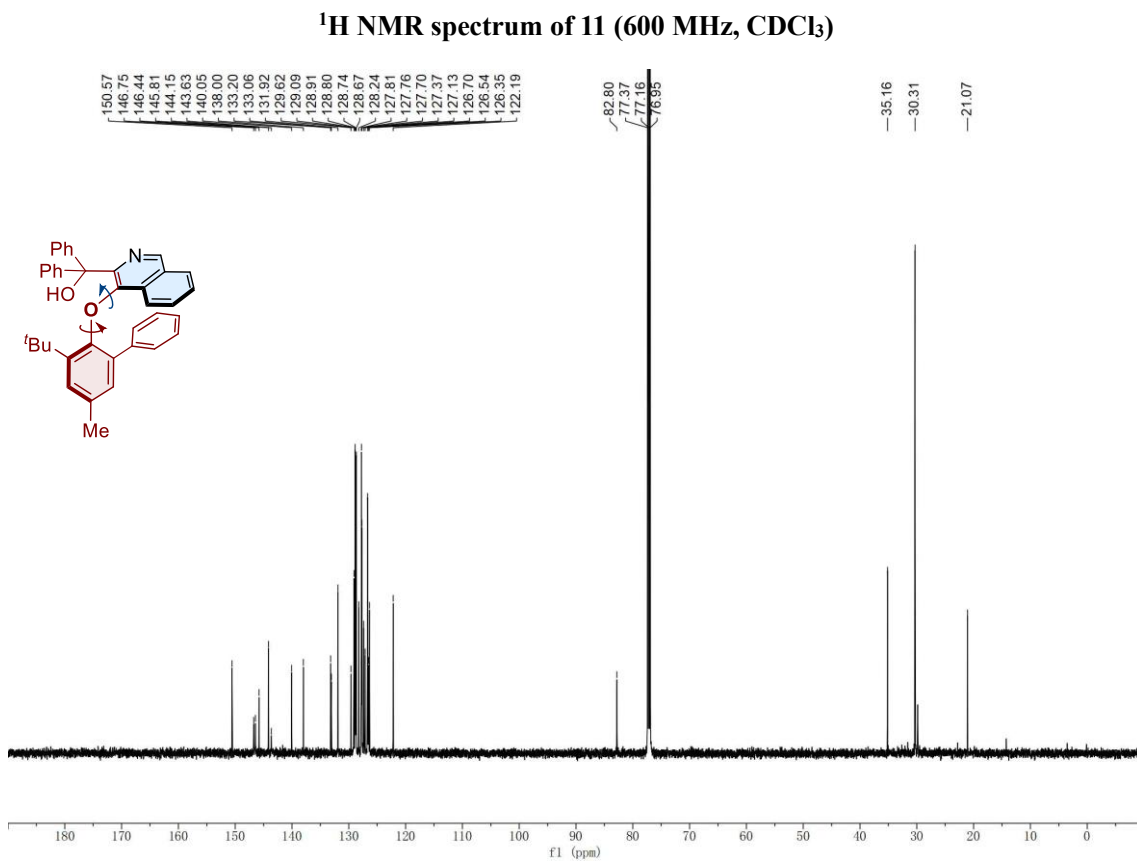

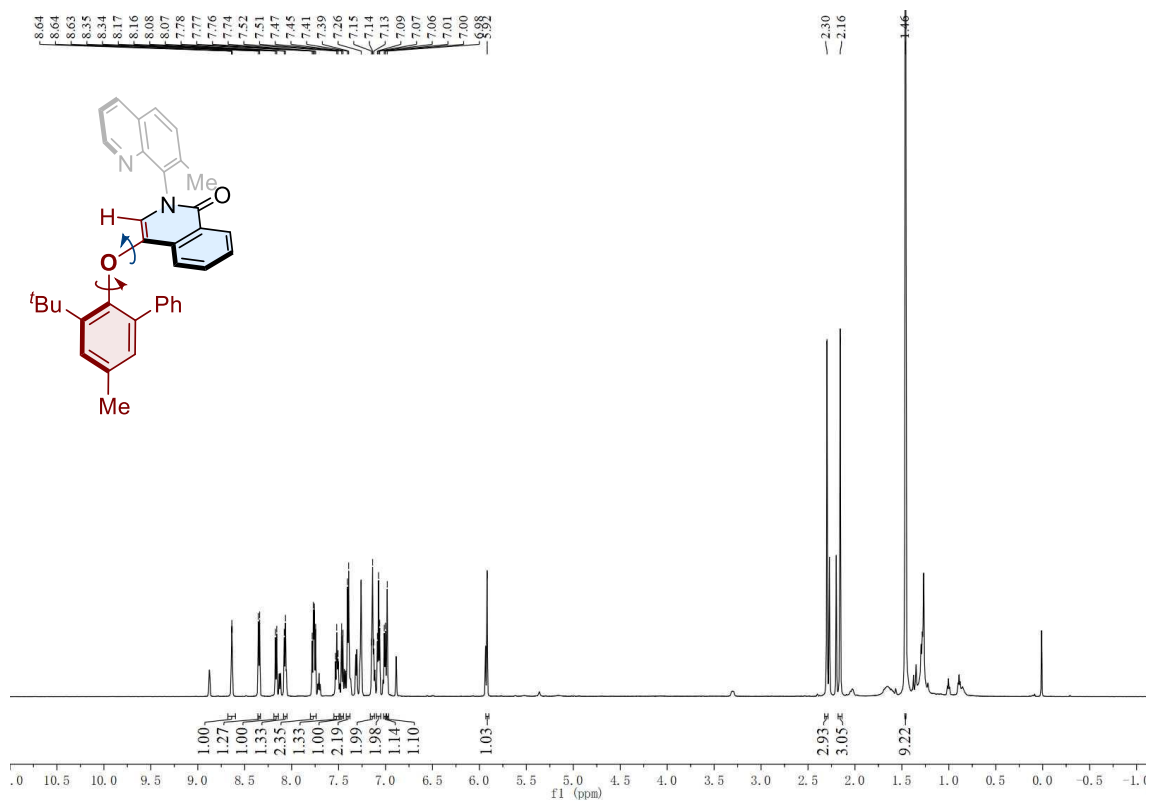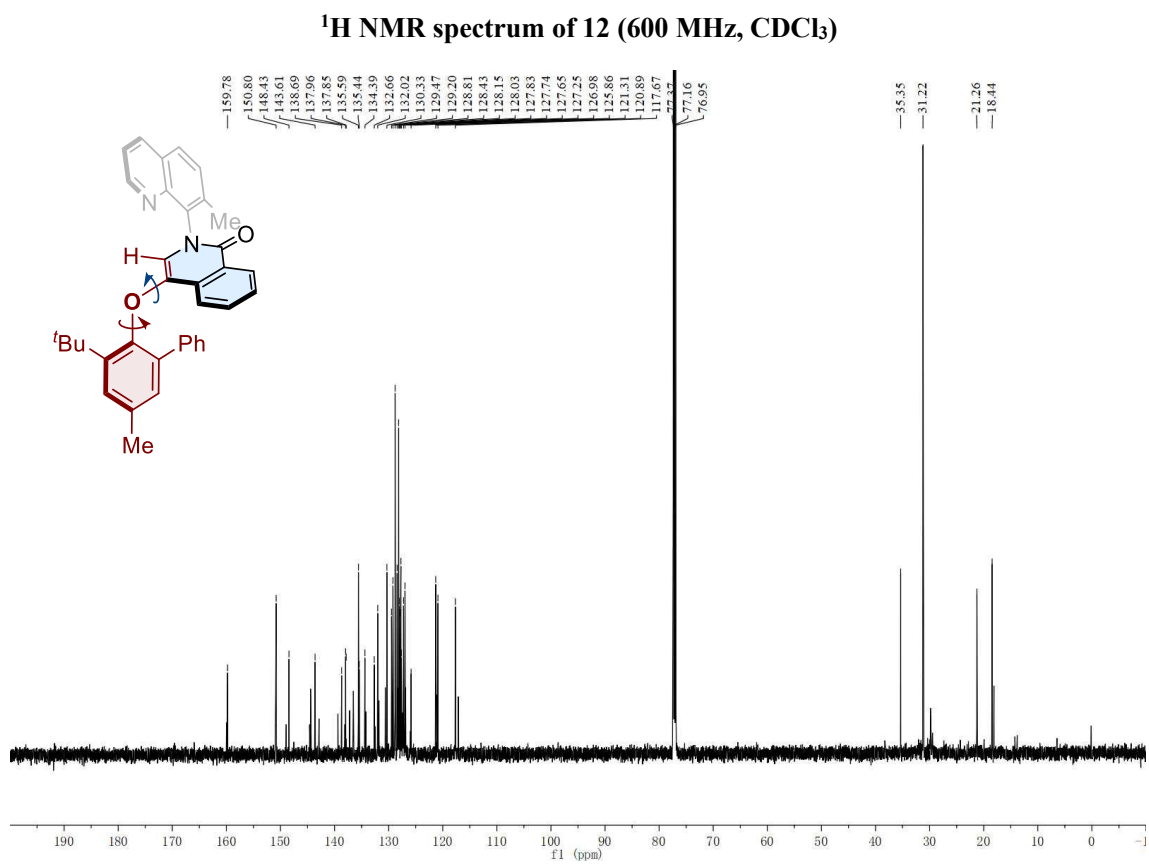

### 13. Supplementary references

1. S. Zhai, S. Qiu, X. Chen, J. Wu, H. Zhao, C. Tao, Y. Li, B. Cheng, H. Wang and H. Zhai, *Chem. Commun.*, 2018, **54**, 98-101.
2. H. Zhai, M. Liu, C. Wang, S. Qiu, J. Wei, H. Yang and Y. Wu, *J. Org. Chem.*, 2021, **86**, 14915-14927.
3. O. Smith, M. -J. Hindson, A. Sreenithya, Jonathan W. Burton and Martin D. Smith, *Nat. Synth.*, 2024, **3**, 58–66.
4. K. Stanek, R. Koller and A. Togni, *J. Org. Chem.*, 2008, **73**, 7678.
5. Y.-Y. Y, J.-W. Li, J.-R. Z and L Z, *Angew. Chem. Int. Ed.*, 2017, **56**, 9217-9221.
6. M. Yasunori, Y. Kotomi and H. Tamejiro, *Angew. Chem. Int. Ed.*, 2013, **125**, 10805 –10809.
7. V. S. Raut, M. Jean, N. Vanthuyne, C. Roussel, T. Constantieux, C. Bressy, X. Bugaut, D. Bonne and J. Rodriguez, *J. Am. Chem. Soc.*, 2017, **139**, 2140-2143.
8. Z.-S. Liu, Y. Hua, Q. Gao, Y. Ma, H. Tang, Y. Shang, H.-G. Cheng and Q. Zhou, *Nat. Catal.*, 2020, **3**, 727-733.
9. Z.-S. Liu, P.-P. Xie, Y. Hua, C. Wu, Y. Ma, J. Chen, H.-G. Chen, X. Hong and Q. Zhou, *Chem*, 2021, **7**, 1917-1932.
10. Y. Zhang, C. Yang, X. Meng, M. Wu, D. Yang, M.-P. Song and J.-L. Niu, *Org. Lett.*, 2025, **27**, 6076-6081.
11. A. Naghim, P. Solai, M. Giorgi, J.-V. Naubron, S. Humbel, R. Gupta, J. Rodriguez, O. Chuzel, G. Chouraqui and D. Bonne, *ChemistryEurope*, 2026, **4**, e70257.
